# Supplementary material for: Spatial transcriptomic atlas of murine neurotoxocariasis reveals region-specific host responses and dysfunction in the brain
Source: Research Square preprint supplement (doi:10.21203/rs.3.rs-6743037/v1), 2025-06-09
Supplement: Supplementary file 1 [file 0f9dce316e9c69d13d34f19c.xlsx]

## Sheet: Table S3
Table S3. Differential analysis of transcription between infective larvae of Toxocara canis treated with sera from Toxocara canis-infected and -uninfected control mice for 24 hours in vitro – employing RNA-seq data.
Gene_id	Transcript_id	Description	Positive_serum_treatment_1	Positive_serum_treatment_2	Positive_serum_treatment_3	Negative_serum_treatment_1	Negative_serum_treatment_2	Negative_serum_treatment_3	p val	q val	Fold change (fc)	log2(fc)	Regulation
Tcan_10828	gnlWGS:JPKZTcan_10828_1s_mrna	Zinc metalloproteinase nas-13 [Toxocara canis]	182.072	158.566	125.807	50.1035	44.7538	39.3168	2.12949e-60	3.69253e-56	3.47642	1.7976	up
Tcan_07701	gnlWGS:JPKZTcan_07701_1s_mrna	hypothetical protein Tcan_07701 [Toxocara canis]	222.836	250.561	438.958	0	0	0	8.6197e-29	7.47328e-25	3.04118e+06	21.5362	up
Tcan_10820	gnlWGS:JPKZTcan_10820_1s_mrna	Zinc metalloproteinase nas-13 [Toxocara canis]	130.853	129.229	110.699	47.1335	43.205	43.5226	1.32469e-23	7.65671e-20	2.76989	1.46983	up
Tcan_16812	gnlWGS:JPKZTcan_16812_1s_mrna	Ancylostoma secreted protein [Toxocara canis]	38.8507	33.9413	28.6692	18.6117	19.5665	15.7843	2.90295e-20	1.25843e-16	1.88022	0.910898	up
Tcan_13535	gnlWGS:JPKZTcan_13535_1s_mrna	hypothetical protein Tcan_13535 [Toxocara canis]	93.7266	98.4814	79.1237	41.2693	40.3085	36.5203	1.51007e-19	5.23693e-16	2.29751	1.20007	up
Tcan_02301	gnlWGS:JPKZTcan_02301_1s_mrna	Insulin-like receptor, partial [Toxocara canis]	20.9	14.1714	16.7085	0	0	0	3.15309e-16	9.11243e-13	172600	17.3971	up
Tcan_18910	gnlWGS:JPKZTcan_18910_1s_mrna	Zinc metalloproteinase nas-13 [Toxocara canis]	681.869	575.777	347.036	235.347	247.223	165.151	4.55511e-15	1.12837e-11	2.47743	1.30884	up
Tcan_07551	gnlWGS:JPKZTcan_07551_1s_mrna	hypothetical protein Tcan_07551 [Toxocara canis]	670.367	581.55	356.989	230.765	241.501	141.71	1.3213e-14	2.86391e-11	2.62047	1.38983	up
Tcan_04905	gnlWGS:JPKZTcan_04905_1s_mrna	Ancylostoma secreted protein [Toxocara canis]	765.752	712.613	508.452	413.687	393.884	346.759	2.29179e-14	4.41551e-11	1.72119	0.783403	up
Tcan_12866	gnlWGS:JPKZTcan_12866_1s_mrna	Low affinity immunoglobulin epsilon Fc receptor [Toxocara canis]	86.2302	83.236	74.1411	48.4336	44.0754	36.6418	1.05832e-13	1.83512e-10	1.88622	0.915501	up
Tcan_11927	gnlWGS:JPKZTcan_11927_1s_mrna	hypothetical protein Tcan_11927 [Toxocara canis]	0	0	0	0	6.1439	0	6.34583e-12	1.00033e-08	4.88289e-05	-14.3219	down
Tcan_05459	gnlWGS:JPKZTcan_05459_1s_mrna	Zinc metalloproteinase nas-15 [Toxocara canis]	1227.57	1208.34	998.859	668.193	675.391	629.376	1.8413e-11	2.66068e-08	1.74092	0.799852	up
Tcan_10130	gnlWGS:JPKZTcan_10130_1s_mrna	Filamin-A, partial [Toxocara canis]	26.993	17.6594	16.1946	10.8557	10.8709	8.21479	4.01414e-11	5.35425e-08	2.0322	1.02304	up
Tcan_12428	gnlWGS:JPKZTcan_12428_1s_mrna	Polypeptide N-acetylgalactosaminyltransferase 5 [Toxocara canis]	110.189	94.7305	70.3585	61.5786	68.1213	52.7964	7.09984e-11	8.79366e-08	1.5084	0.593024	up
Tcan_02573	gnlWGS:JPKZTcan_02573_1s_mrna	Ancylostoma secreted protein [Toxocara canis]	1525.98	1394.75	943.697	893.878	894.261	666.632	4.31477e-10	4.26901e-07	1.57426	0.654669	up
Tcan_18321	gnlWGS:JPKZTcan_18321_1s_mrna	hypothetical protein Tcan_18321 [Toxocara canis]	91.1235	83.9622	67.098	47.6579	42.0288	42.4939	3.87157e-10	4.26901e-07	1.83222	0.873591	up
Tcan_12247	gnlWGS:JPKZTcan_12247_1s_mrna	Serine/threonine-protein kinase SMG1 [Toxocara canis]	14.3696	11.6504	10.0127	7.45791	7.44514	4.66481	4.4315e-10	4.26901e-07	1.84142	0.880821	up
Tcan_13530	gnlWGS:JPKZTcan_13530_1s_mrna	hypothetical protein Tcan_13530 [Toxocara canis]	219.063	0	0	0	0	0	4.13353e-10	4.26901e-07	730210	19.478	up
Tcan_16921	gnlWGS:JPKZTcan_16921_1s_mrna	Putative polypeptide N-acetylgalactosaminyltransferase 10 [Toxocara canis]	55.0441	55.8539	41.851	34.8286	35.9813	30.4045	9.71256e-10	8.86399e-07	1.50916	0.593748	up
Tcan_07204	gnlWGS:JPKZTcan_07204_1s_mrna	Titin [Toxocara canis]	6.01131	5.20643	4.09711	1.70286	2.51147	1.9582	1.05467e-09	9.14397e-07	2.48113	1.311	up
Tcan_03021	gnlWGS:JPKZTcan_03021_1s_mrna	Alpha-mannosidase 2 [Toxocara canis]	27.9148	25.1783	19.8891	18.7753	20.3144	15.5014	2.7052e-09	2.23372e-06	1.33689	0.418879	up
Tcan_00854	gnlWGS:JPKZTcan_00854_1s_mrna	hypothetical protein Tcan_00854, partial [Toxocara canis]	158.351	155.409	129.679	99.2874	93.1964	84.9952	4.15257e-09	3.14158e-06	1.5981	0.676354	up
Tcan_16115	gnlWGS:JPKZTcan_16115_1s_mrna	Ancylostoma secreted protein [Toxocara canis]	14.6682	18.0108	12.9314	7.50512	8.31112	6.50449	4.16703e-09	3.14158e-06	2.04341	1.03098	up
Tcan_08559	gnlWGS:JPKZTcan_08559_1s_mrna	hypothetical protein Tcan_08559 [Toxocara canis]	0	0	0	0	18.4291	0	4.45933e-09	3.22187e-06	1.62786e-05	-15.9067	down
Tcan_06738	gnlWGS:JPKZTcan_06738_1s_mrna	hypothetical protein Tcan_06738 [Toxocara canis]	68.1941	56.6819	39.9308	35.7937	36.5244	30.1193	5.24847e-09	3.64034e-06	1.60885	0.686033	up
Tcan_12854	gnlWGS:JPKZTcan_12854_1s_mrna	Fatty acid synthase [Toxocara canis]	28.0846	22.9887	22.3062	16.3506	17.7586	12.3342	6.86155e-09	4.57613e-06	1.57998	0.659903	up
Tcan_12175	gnlWGS:JPKZTcan_12175_1s_mrna	Prion-like-(Q/N-rich) domain-bearing protein 25 [Toxocara canis]	7.29995	5.48771	5.18101	3.29538	3.05324	3.03997	9.83264e-09	6.14392e-06	1.91388	0.936503	up
Tcan_03041	gnlWGS:JPKZTcan_03041_1s_mrna	hypothetical protein Tcan_03041 [Toxocara canis]	2042.35	1467.13	911.273	740.995	785.321	522.635	9.92099e-09	6.14392e-06	2.15757	1.10941	up
Tcan_16810	gnlWGS:JPKZTcan_16810_1s_mrna	WD repeat-containing protein 62, partial [Toxocara canis]	33.2771	29.3983	28.0146	19.6302	22.193	16.3877	1.29559e-08	7.74675e-06	1.55795	0.639651	up
Tcan_08239	gnlWGS:JPKZTcan_08239_1s_mrna	DmX-like protein 1, partial [Toxocara canis]	0	0	0	0	8.16089	0	1.67139e-08	9.66063e-06	3.67607e-05	-14.7315	down
Tcan_06164	gnlWGS:JPKZTcan_06164_1s_mrna	hypothetical protein Tcan_06164 [Toxocara canis]	0	0	0	0	0	8.48098	2.71522e-08	1.51877e-05	3.53733e-05	-14.787	down
Tcan_17069	gnlWGS:JPKZTcan_17069_1s_mrna	hypothetical protein Tcan_17069 [Toxocara canis]	0	0	0	9.61342	0	0	2.8616e-08	1.55063e-05	3.12064e-05	-14.9678	down
Tcan_14070	gnlWGS:JPKZTcan_14070_1s_mrna	hypothetical protein Tcan_14070 [Toxocara canis]	25.3458	22.1696	20.3688	14.0739	14.0748	11.9949	3.29507e-08	1.73141e-05	1.69104	0.757908	up
Tcan_12701	gnlWGS:JPKZTcan_12701_1s_mrna	putative N-acetylgalactosaminyltransferase 9 [Toxocara canis]	26.4749	24.0266	21.6344	16.6625	18.1356	14.2054	4.10236e-08	2.0922e-05	1.47206	0.557832	up
Tcan_14603	gnlWGS:JPKZTcan_14603_1s_mrna	hypothetical protein Tcan_14603 [Toxocara canis]	0	0	2.63235	0	0	0	4.42986e-08	2.19468e-05	8774.5	13.0991	up
Tcan_02403	gnlWGS:JPKZTcan_02403_1s_mrna	hypothetical protein Tcan_02403 [Toxocara canis]	55.2408	51.5889	39.85	36.5283	37.1345	25.2938	5.09267e-08	2.45297e-05	1.48226	0.567801	up
Tcan_00667	gnlWGS:JPKZTcan_00667_1s_mrna	hypothetical protein Tcan_00667, partial [Toxocara canis]	27.0168	23.2817	16.4972	42.7069	42.7372	40.3507	5.56918e-08	2.60999e-05	0.530989	-0.913245	down
Tcan_16335	gnlWGS:JPKZTcan_16335_1s_mrna	Vacuolar protein sorting-associated protein 13C [Toxocara canis]	16.502	15.1554	14.6645	8.66267	6.25177	5.35655	7.08915e-08	3.23489e-05	2.28514	1.19228	up
Tcan_02098	gnlWGS:JPKZTcan_02098_1s_mrna	hypothetical protein Tcan_02098 [Toxocara canis]	0	14.5047	0	0	0	0	8.02156e-08	3.56651e-05	48349.1	15.5612	up
Tcan_12245	gnlWGS:JPKZTcan_12245_1s_mrna	Isocitrate dehydrogenase [NADP], mitochondrial [Toxocara canis]	179.453	156.839	115.425	109.816	120.68	96.3229	9.67719e-08	4.09274e-05	1.38216	0.466926	up
Tcan_14364	gnlWGS:JPKZTcan_14364_1s_mrna	Aggrecan core protein, partial [Toxocara canis]	14.494	17.4313	14.7082	7.95847	5.86024	6.2327	9.63069e-08	4.09274e-05	2.3257	1.21767	up
Tcan_11050	gnlWGS:JPKZTcan_11050_1s_mrna	hypothetical protein Tcan_11050 [Toxocara canis]	23.2519	22.257	19.3457	13.2669	11.598	11.609	1.0049e-07	4.14882e-05	1.77811	0.830347	up
Tcan_15058	gnlWGS:JPKZTcan_15058_1s_mrna	hypothetical protein Tcan_15058 [Toxocara canis]	0	0	0	2.39073	2.10757	2.86492	1.76839e-07	7.13115e-05	4.0743e-05	-14.5831	down
Tcan_08739	gnlWGS:JPKZTcan_08739_1s_mrna	hypothetical protein Tcan_08739 [Toxocara canis]	14.8658	12.3156	10.6767	9.13516	8.03665	6.15452	2.10653e-07	8.30166e-05	1.62298	0.698645	up
Tcan_03433	gnlWGS:JPKZTcan_03433_1s_mrna	hypothetical protein Tcan_03433 [Toxocara canis]	294.91	300.614	276.206	174.272	163.242	164.35	2.83231e-07	0.000109138	1.73698	0.796584	up
Tcan_17834	gnlWGS:JPKZTcan_17834_1s_mrna	Lipase -like protein [Toxocara canis]	34.5482	41.9668	36.1047	20.2935	22.5177	18.7783	3.03748e-07	0.0001145	1.82855	0.870703	up
Tcan_03789	gnlWGS:JPKZTcan_03789_1s_mrna	hypothetical protein Tcan_03789 [Toxocara canis]	8.65553	8.79586	8.39327	4.2561	4.30685	4.36602	3.16234e-07	0.00011667	1.99897	0.99926	up
Tcan_08180	gnlWGS:JPKZTcan_08180_1s_mrna	hypothetical protein Tcan_08180 [Toxocara canis]	143.656	137.72	116.282	91.034	87.4532	82.3076	3.6434e-07	0.000131618	1.52479	0.608611	up
Tcan_02533	gnlWGS:JPKZTcan_02533_1s_mrna	Alpha-mannosidase 2x [Toxocara canis]	23.3354	21.3533	16.4745	14.8494	15.5872	12.7137	5.22011e-07	0.000184728	1.41744	0.503289	up
Tcan_06787	gnlWGS:JPKZTcan_06787_1s_mrna	Uridine phosphorylase 1 [Toxocara canis]	43.7674	51.4297	46.5467	26.8166	25.4123	24.8211	1.38835e-06	0.000481478	1.83963	0.879418	up
Tcan_15356	gnlWGS:JPKZTcan_15356_1s_mrna	hypothetical protein Tcan_15356 [Toxocara canis]	21.3607	19.0281	18.8163	13.4661	13.7641	10.7816	2.09751e-06	0.000713153	1.55754	0.639273	up
Tcan_01075	gnlWGS:JPKZTcan_01075_1s_mrna	hypothetical protein Tcan_01075, partial [Toxocara canis]	847.201	905.873	1016.87	422.699	402.773	463.227	2.24866e-06	0.000749842	2.14941	1.10394	up
Tcan_08186	gnlWGS:JPKZTcan_08186_1s_mrna	hypothetical protein Tcan_08186 [Toxocara canis]	70.6526	71.7389	55.1663	39.2816	33.5027	38.2627	2.3801e-06	0.000778696	1.77905	0.831104	up
Tcan_06479	gnlWGS:JPKZTcan_06479_1s_mrna	hypothetical protein Tcan_06479 [Toxocara canis]	481.537	427.698	335.774	329.233	339.087	292.194	2.91206e-06	0.000932675	1.29619	0.374277	up
Tcan_13542	gnlWGS:JPKZTcan_13542_1s_mrna	Helix-loop-helix protein 6 [Toxocara canis]	8.38149	5.80431	3.41367	1.84635	2.4556	1.83294	2.95831e-06	0.000932675	2.86876	1.52042	up
Tcan_07961	gnlWGS:JPKZTcan_07961_1s_mrna	Basement membrane proteoglycan [Toxocara canis]	35.6715	32.9718	35.8787	16.5099	17.0067	19.1269	3.25335e-06	0.00100738	1.98547	0.989481	up
Tcan_06256	gnlWGS:JPKZTcan_06256_1s_mrna	hypothetical protein Tcan_06256 [Toxocara canis]	6.89247	6.2904	5.70538	3.49365	3.63185	3.58808	4.74344e-06	0.00141813	1.76302	0.818049	up
Tcan_00454	gnlWGS:JPKZTcan_00454_1s_mrna	Mesocentin, partial [Toxocara canis]	3.50461	2.20037	3.47827	0.711744	0.914469	0.972697	4.7054e-06	0.00141813	3.5335	1.8211	up
Tcan_17459	gnlWGS:JPKZTcan_17459_1s_mrna	hypothetical protein Tcan_17459, partial [Toxocara canis]	0	0	0	0.575512	0.666975	0.743993	5.35193e-06	0.00157292	0.000151021	-12.693	down
Tcan_11990	gnlWGS:JPKZTcan_11990_1s_mrna	Antigen -like protein [Toxocara canis]	25.7494	24.7069	21.3643	18.5494	17.2884	15.3399	6.12902e-06	0.00175293	1.40336	0.488881	up
Tcan_09491	gnlWGS:JPKZTcan_09491_1s_mrna	E3 ubiquitin-protein ligase HUWE1 [Toxocara canis]	13.7279	11.7083	11.6787	8.65576	9.4858	7.65381	6.16658e-06	0.00175293	1.43882	0.524884	up
Tcan_16788	gnlWGS:JPKZTcan_16788_1s_mrna	Lysine-specific demethylase rbr-2 [Toxocara canis]	18.6382	14.9914	13.1668	11.2355	13.3415	9.75757	8.81067e-06	0.00246415	1.36295	0.446734	up
Tcan_16595	gnlWGS:JPKZTcan_16595_1s_mrna	Homeobox protein ceh-26 [Toxocara canis]	25.6604	22.2716	18.2219	18.3871	19.1156	13.2881	9.03288e-06	0.00247544	1.30248	0.381258	up
Tcan_18291	gnlWGS:JPKZTcan_18291_1s_mrna	hypothetical protein Tcan_18291 [Toxocara canis]	84.7352	85.5314	63.6917	63.4608	60.5316	47.6163	9.13656e-06	0.00247544	1.36332	0.447129	up
Tcan_08770	gnlWGS:JPKZTcan_08770_1s_mrna	Unconventional myosin-Va [Toxocara canis]	9.52283	6.29749	6.36461	3.04585	2.69611	3.00383	9.86946e-06	0.00263287	2.53664	1.34292	up
Tcan_09141	gnlWGS:JPKZTcan_09141_1s_mrna	Putative alpha-1,3-mannosyl-glycoprotein 2-beta-N-acetylglucosaminyltransferase [Toxocara canis]	48.8835	49.6231	35.0971	36.1338	37.0616	28.3243	1.01854e-05	0.00267598	1.31604	0.396201	up
Tcan_02123	gnlWGS:JPKZTcan_02123_1s_mrna	unnamed protein product [Toxocara canis]	0.276459	0.560776	0.27221	3.27449	3.21	1.71628	1.1211e-05	0.00290148	0.135286	-2.88592	down
Tcan_00011	gnlWGS:JPKZTcan_00011_1s_mrna	hypothetical protein Tcan_00011 [Toxocara canis]	552.792	478.598	327.027	358.082	354.095	274.16	1.20365e-05	0.00306931	1.37723	0.461773	up
Tcan_14519	gnlWGS:JPKZTcan_14519_1s_mrna	hypothetical protein Tcan_14519 [Toxocara canis]	1774.54	1912.85	2049.82	1026.65	1023.28	1060	1.46474e-05	0.00368097	1.8448	0.883468	up
Tcan_15544	gnlWGS:JPKZTcan_15544_1s_mrna	Group XV phospholipase A2 [Toxocara canis]	22.1307	21.2873	15.7712	33.4225	30.8129	25.7262	1.51711e-05	0.00375809	0.657939	-0.603975	down
Tcan_12549	gnlWGS:JPKZTcan_12549_1s_mrna	Piezo-type mechanosensitive ion channel component 1 [Toxocara canis]	10.8601	9.0417	8.83886	7.53335	7.00213	5.34327	1.60004e-05	0.0039077	1.4458	0.531868	up
Tcan_13298	gnlWGS:JPKZTcan_13298_1s_mrna	Uncharacterized protein C35A5.10 [Toxocara canis]	19.7875	20.41	17.3916	14.4977	12.0666	10.1353	1.80214e-05	0.00434015	1.5692	0.65003	up
Tcan_02883	gnlWGS:JPKZTcan_02883_1s_mrna	hypothetical protein Tcan_02883 [Toxocara canis]	25.9519	22.7909	14.25	11.5275	15.5673	10.5904	2.67429e-05	0.00635236	1.67156	0.741192	up
Tcan_07952	gnlWGS:JPKZTcan_07952_1s_mrna	Basement membrane proteoglycan [Toxocara canis]	51.8768	41.2767	47.6532	27.7351	29.3959	28.0028	3.01091e-05	0.0070553	1.65395	0.725913	up
Tcan_04810	gnlWGS:JPKZTcan_04810_1s_mrna	Cdc42 -like protein [Toxocara canis]	10.0888	9.05565	6.86017	4.89849	6.31378	5.10447	3.43513e-05	0.00794203	1.59374	0.672417	up
Tcan_08280	gnlWGS:JPKZTcan_08280_1s_mrna	hypothetical protein Tcan_08280 [Toxocara canis]	128.219	134.495	200.223	58.1691	57.373	72.7015	3.53765e-05	0.00807142	2.45924	1.29821	up
Tcan_06897	gnlWGS:JPKZTcan_06897_1s_mrna	ER degradation-enhancing alpha-mannosidase-like protein 1 [Toxocara canis]	25.0253	22.0276	21.667	17.7626	17.1873	14.1423	3.8141e-05	0.00858917	1.39981	0.485232	up
Tcan_12384	gnlWGS:JPKZTcan_12384_1s_mrna	WD repeat-containing protein 11 [Toxocara canis]	9.26853	6.50906	7.44381	4.27833	4.87804	3.38203	4.15728e-05	0.00924196	1.85202	0.889102	up
Tcan_06568	gnlWGS:JPKZTcan_06568_1s_mrna	hypothetical protein Tcan_06568 [Toxocara canis]	81.4787	66.2212	32.7802	35.2982	32.8254	23.1071	4.35614e-05	0.00956144	1.97828	0.984248	up
Tcan_14066	gnlWGS:JPKZTcan_14066_1s_mrna	hypothetical protein Tcan_14066 [Toxocara canis]	5.97117	7.8805	6.14245	3.34459	2.98554	3.07948	4.48977e-05	0.00973158	2.12486	1.08737	up
Tcan_07372	gnlWGS:JPKZTcan_07372_1s_mrna	Protein purity of essence [Toxocara canis]	4.95921	4.38547	3.56483	3.30106	3.19922	1.90436	4.61316e-05	0.00987558	1.536	0.619176	up
Tcan_17035	gnlWGS:JPKZTcan_17035_1s_mrna	hypothetical protein Tcan_17035 [Toxocara canis]	19.591	15.9574	16.5341	11.5546	10.5023	10.6676	4.84237e-05	0.0102398	1.59154	0.670427	up
Tcan_15397	gnlWGS:JPKZTcan_15397_1s_mrna	E3 ubiquitin-protein ligase HECTD1 [Toxocara canis]	17.1242	13.816	15.6785	9.91157	10.9357	9.28486	5.05227e-05	0.010555	1.54714	0.629607	up
Tcan_04750	gnlWGS:JPKZTcan_04750_1s_mrna	Spermatogenesis-associated protein 5, partial [Toxocara canis]	2.66424	1.67544	1.47621	4.77791	4.16748	4.40143	5.5156e-05	0.0112518	0.435751	-1.19843	down
Tcan_01822	gnlWGS:JPKZTcan_01822_1s_mrna	hypothetical protein Tcan_01822 [Toxocara canis]	14.9971	10.9031	13.0939	7.82844	7.75129	5.54677	5.50679e-05	0.0112518	1.84574	0.884199	up
Tcan_10901	gnlWGS:JPKZTcan_10901_1s_mrna	hypothetical protein Tcan_10901 [Toxocara canis]	194.267	178.412	140.899	150.273	140.996	118.93	5.9432e-05	0.0119831	1.25202	0.32426	up
Tcan_18698	gnlWGS:JPKZTcan_18698_1s_mrna	WD repeat-containing protein 7 [Toxocara canis]	10.6659	9.06719	7.54201	7.62939	8.32053	6.29779	6.96998e-05	0.013734	1.22597	0.293926	up
Tcan_00008	gnlWGS:JPKZTcan_00008_1s_mrna	hypothetical protein Tcan_00008 [Toxocara canis]	1982.4	1761.73	1292.43	1427.39	1465.46	1202.09	6.92201e-05	0.013734	1.22995	0.298596	up
Tcan_13152	gnlWGS:JPKZTcan_13152_1s_mrna	Insulin-like growth factor-binding protein complex acid labile subunit [Toxocara canis]	16.5716	14.821	12.1695	12.0913	12.6505	10.4132	7.66898e-05	0.0149416	1.23914	0.309345	up
Tcan_09325	gnlWGS:JPKZTcan_09325_1s_mrna	PDZ domain-containing protein 2 [Toxocara canis]	8.86787	7.17481	6.04591	6.16207	5.49626	4.69905	8.57881e-05	0.0165285	1.35037	0.433359	up
Tcan_09979	gnlWGS:JPKZTcan_09979_1s_mrna	Poly(A) RNA polymerase gld-2, partial [Toxocara canis]	0.085335	0.144792	0.063363	0	0	0	8.99643e-05	0.0171427	978.3	9.93413	up
Tcan_18503	gnlWGS:JPKZTcan_18503_1s_mrna	Cystinosin -like protein [Toxocara canis]	62.6125	61.1682	47.9122	45.7291	46.273	41.1697	0.000101778	0.0191829	1.28926	0.366541	up
Tcan_02213	gnlWGS:JPKZTcan_02213_1s_mrna	Hexosaminidase D [Toxocara canis]	42.5226	33.7606	19.6763	19.0886	21.5607	14.9242	0.000112972	0.0210585	1.72671	0.788029	up
Tcan_17640	gnlWGS:JPKZTcan_17640_1s_mrna	Ancylostoma secreted protein [Toxocara canis]	90.9334	104.422	109.981	54.2349	57.9798	59.4406	0.000114158	0.0210585	1.77877	0.830882	up
Tcan_03040	gnlWGS:JPKZTcan_03040_1s_mrna	hypothetical protein Tcan_03040 [Toxocara canis]	34.0066	28.1681	25.7989	17.5323	17.5933	18.0372	0.000129649	0.0236643	1.6548	0.726654	up
Tcan_10878	gnlWGS:JPKZTcan_10878_1s_mrna	Alpha-1,3-mannosyl-glycoprotein 4-beta-N-acetylglucosaminyltransferase A [Toxocara canis]	20.1022	16.9047	13.1613	12.3892	14.7579	11.1715	0.000142696	0.0255088	1.30924	0.388731	up
Tcan_13230	gnlWGS:JPKZTcan_13230_1s_mrna	Uncharacterized protein Tcan_13230 [Toxocara canis]	14.811	16.3966	13.9565	10.2914	6.42484	7.36743	0.000141839	0.0255088	1.8753	0.907124	up
Tcan_04640	gnlWGS:JPKZTcan_04640_1s_mrna	hypothetical protein Tcan_04640 [Toxocara canis]	0	0	0	0.896394	2.12946	1.80992	0.000149102	0.026382	6.20378e-05	-13.9765	down
Tcan_15923	gnlWGS:JPKZTcan_15923_1s_mrna	Eukaryotic translation initiation factor 2-alpha kinase 3 [Toxocara canis]	12.7784	11.075	9.67457	9.84188	9.59469	7.49826	0.000163664	0.0283794	1.24478	0.315894	up
Tcan_03043	gnlWGS:JPKZTcan_03043_1s_mrna	hypothetical protein Tcan_03043 [Toxocara canis]	76.1544	71.4933	62.2326	49.1103	43.2813	47.486	0.00016326	0.0283794	1.50046	0.585402	up
Tcan_03910	gnlWGS:JPKZTcan_03910_1s_mrna	Methyltransferase-like protein 13 [Toxocara canis]	13.9465	13.845	10.4879	9.33206	8.74526	8.6519	0.000181183	0.031106	1.43212	0.518149	up
Tcan_07062	gnlWGS:JPKZTcan_07062_1s_mrna	Sodium/chloride cotransporter 3 [Toxocara canis]	40.903	37.468	25.2324	27.6418	28.9421	23.6426	0.000202585	0.0340417	1.29138	0.368919	up
Tcan_03815	gnlWGS:JPKZTcan_03815_1s_mrna	Threonine--tRNA ligase, cytoplasmic [Toxocara canis]	61.9314	61.9912	52.6812	48.364	47.222	40.7313	0.000202193	0.0340417	1.29553	0.373548	up
Tcan_17237	gnlWGS:JPKZTcan_17237_1s_mrna	Collectin-12 [Toxocara canis]	5.72431	7.47829	6.70216	3.94024	4.20146	2.74951	0.000204172	0.0340417	1.8276	0.869948	up
Tcan_00087	gnlWGS:JPKZTcan_00087_1s_mrna	hypothetical protein Tcan_00087, partial [Toxocara canis]	22.8575	14.161	12.7539	11.0607	12.4925	8.69191	0.00020614	0.0340426	1.54357	0.62627	up
Tcan_16940	gnlWGS:JPKZTcan_16940_1s_mrna	Unconventional myosin-Id [Toxocara canis]	8.12633	7.47771	7.09334	5.10248	5.17708	5.19541	0.000223731	0.0365991	1.46672	0.55259	up
Tcan_11188	gnlWGS:JPKZTcan_11188_1s_mrna	Prominin-1 [Toxocara canis]	2.56741	2.05957	1.37425	1.18031	0.727691	0.963807	0.000226253	0.0366657	2.08971	1.0633	up
Tcan_02780	gnlWGS:JPKZTcan_02780_1s_mrna		10.7249	3.62101	1.95454	1.78313	1.79534	1.1998	0.000235086	0.0377444	3.41138	1.77035	up
Tcan_11004	gnlWGS:JPKZTcan_11004_1s_mrna	Mesocentin [Toxocara canis]	3.62415	3.04904	2.52873	2.27111	2.74479	1.85165	0.000284858	0.0453159	1.33991	0.42214	up
Tcan_13587	gnlWGS:JPKZTcan_13587_1s_mrna	hypothetical protein Tcan_13587 [Toxocara canis]	1.40816	0.936399	0.866007	2.8965	3.65231	4.47523	0.000310951	0.0490171	0.291234	-1.77975	down
Tcan_12162	gnlWGS:JPKZTcan_12162_1s_mrna	Patched domain-containing protein 4 [Toxocara canis]	2.80543	2.46066	2.17081	1.98253	1.82004	1.61267	0.000315908	0.0493499	1.37333	0.457679	up
Tcan_18351	gnlWGS:JPKZTcan_18351_1s_mrna	Major facilitator superfamily domain-containing protein 5 [Toxocara canis]	37.645	36.3124	29.6708	24.8403	27.5933	25.0719	0.000328764	0.0508997	1.33704	0.419046	up
Tcan_15880	gnlWGS:JPKZTcan_15880_1s_mrna	Inverted formin-2 [Toxocara canis]	4.45979	4.06855	3.6254	2.8684	3.36571	1.80396	0.0003331	0.0511147	1.51202	0.59648	up
Tcan_15628	gnlWGS:JPKZTcan_15628_1s_mrna	hypothetical protein Tcan_15628 [Toxocara canis]	43.5539	39.7741	27.1672	59.0584	57.2961	44.7185	0.000346682	0.0527321	0.685995	-0.543731	down
Tcan_12334	gnlWGS:JPKZTcan_12334_1s_mrna	hypothetical protein Tcan_12334 [Toxocara canis]	12.6884	10.0147	6.81875	6.62367	7.15986	5.58698	0.000372884	0.0562244	1.52406	0.607922	up
Tcan_14279	gnlWGS:JPKZTcan_14279_1s_mrna	Vesicular GABA transporter [Toxocara canis]	6.78107	4.78255	3.72064	8.47926	9.12751	7.31988	0.000389405	0.0567418	0.613169	-0.705644	down
Tcan_04635	gnlWGS:JPKZTcan_04635_1s_mrna	Transmembrane protein [Toxocara canis]	14.4195	12.583	10.569	11.0467	11.9183	9.15972	0.000380817	0.0567418	1.16955	0.225953	up
Tcan_05830	gnlWGS:JPKZTcan_05830_1s_mrna	Leucine--tRNA ligase [Toxocara canis]	18.4016	16.2252	12.0397	12.6919	12.8252	10.6437	0.000388302	0.0567418	1.29052	0.367956	up
Tcan_07778	gnlWGS:JPKZTcan_07778_1s_mrna	Collectin-12 [Toxocara canis]	1.63607	1.90911	1.24192	0.540421	0.796736	0.496157	0.000389272	0.0567418	2.61117	1.3847	up
Tcan_05796	gnlWGS:JPKZTcan_05796_1s_mrna	Baculoviral IAP repeat-containing protein 6 [Toxocara canis]	9.16439	6.97461	7.04131	6.06311	6.61974	5.10935	0.000425317	0.0614583	1.30284	0.381655	up
Tcan_18132	gnlWGS:JPKZTcan_18132_1s_mrna	Transmembrane 9 superfamily member 1 [Toxocara canis]	12.1438	12.6027	14.4134	7.79093	8.04066	7.67205	0.000438022	0.0627711	1.66612	0.736493	up
Tcan_11572	gnlWGS:JPKZTcan_11572_1s_mrna	hypothetical protein Tcan_11572 [Toxocara canis]	0	0	0	0.215589	0.225833	0.364361	0.000459508	0.064108	0.000372309	-11.3912	down
Tcan_18419	gnlWGS:JPKZTcan_18419_1s_mrna	hypothetical protein Tcan_18419 [Toxocara canis]	0	0	0	0.236119	0.163055	0.372982	0.000461535	0.064108	0.000388523	-11.3297	down
Tcan_02936	gnlWGS:JPKZTcan_02936_1s_mrna	hypothetical protein Tcan_02936, partial [Toxocara canis]	0	0	0	0.176172	0.315644	0.12394	0.000460575	0.064108	0.000487206	-11.0032	down
Tcan_14637	gnlWGS:JPKZTcan_14637_1s_mrna	Ryanodine receptor 3 [Toxocara canis]	46.9665	28.3511	20.6573	65.7643	65.9201	44.428	0.000463914	0.064108	0.544964	-0.875767	down
Tcan_00455	gnlWGS:JPKZTcan_00455_1s_mrna	Mesocentin, partial [Toxocara canis]	5.31495	4.40048	6.03068	2.02476	2.86237	2.58421	0.000469534	0.064108	2.10753	1.07556	up
Tcan_12333	gnlWGS:JPKZTcan_12333_1s_mrna	putative endochitinase [Toxocara canis]	0.323252	0.119732	0.48059	0	0	0	0.000466353	0.064108	3078.58	11.588	up
Tcan_02998	gnlWGS:JPKZTcan_02998_1s_mrna	Nucleoside-diphosphatase mig-23 [Toxocara canis]	27.1896	25.9892	27.9578	17.8956	17.8322	17.5483	0.000474676	0.0643038	1.52294	0.606862	up
Tcan_10390	gnlWGS:JPKZTcan_10390_1s_mrna	Splicing factor 3B subunit 3, partial [Toxocara canis]	0.200095	0.168739	0.097791	0	0	0	0.000503279	0.0671297	1555.42	10.6031	up
Tcan_09232	gnlWGS:JPKZTcan_09232_1s_mrna	hypothetical protein Tcan_09232 [Toxocara canis]	0.565996	0.472226	0.101888	0	0	0	0.000500988	0.0671297	3800.37	11.8919	up
Tcan_05138	gnlWGS:JPKZTcan_05138_1s_mrna	hypothetical protein Tcan_05138 [Toxocara canis]	0	0	0	0.30498	0.074346	0.121784	0.000512044	0.067264	0.000598671	-10.7059	down
Tcan_10544	gnlWGS:JPKZTcan_10544_1s_mrna	hypothetical protein Tcan_10544 [Toxocara canis]	23.5547	22.7929	15.4481	15.3813	15.6499	13.1151	0.000511628	0.067264	1.39979	0.485213	up
Tcan_08264	gnlWGS:JPKZTcan_08264_1s_mrna	Short-chain dehydrogenase/reductase family 9C member 7 [Toxocara canis]	0.135923	0.283241	0.149996	0	0	0	0.000529758	0.0690678	1897.2	10.8897	up
Tcan_03326	gnlWGS:JPKZTcan_03326_1s_mrna	BTB and MATH domain-containing protein 15 [Toxocara canis]	16.0749	13.8814	10.7975	12.0811	13.0696	9.71578	0.000536802	0.0694638	1.16885	0.225095	up
Tcan_11125	gnlWGS:JPKZTcan_11125_1s_mrna	hypothetical protein Tcan_11125 [Toxocara canis]	39.2318	33.7144	26.3708	27.3844	31.2551	22.2082	0.000547493	0.0703224	1.22844	0.296833	up
Tcan_12144	gnlWGS:JPKZTcan_12144_1s_mrna	hypothetical protein Tcan_12144 [Toxocara canis]	2.96774	2.57181	2.80827	1.68318	1.35569	1.43978	0.000558527	0.0712122	1.86392	0.898337	up
Tcan_14600	gnlWGS:JPKZTcan_14600_1s_mrna	Isobutyryl-CoA dehydrogenase, mitochondrial [Toxocara canis]	42.8725	38.3816	30.9497	51.531	54.2047	41.9086	0.000567575	0.0718375	0.75996	-0.396004	down
Tcan_02508	gnlWGS:JPKZTcan_02508_1s_mrna	hypothetical protein Tcan_02508 [Toxocara canis]	13.7379	10.6894	9.8382	7.34304	7.01555	6.46793	0.000606783	0.0762435	1.64529	0.718338	up
Tcan_07151	gnlWGS:JPKZTcan_07151_1s_mrna	hypothetical protein Tcan_07151 [Toxocara canis]	2335.28	1981.15	1487.43	1739.72	1765.52	1389.94	0.000614784	0.0765992	1.18563	0.24565	up
Tcan_02531	gnlWGS:JPKZTcan_02531_1s_mrna	Copper-transporting ATPase 1 [Toxocara canis]	38.9759	30.698	23.4339	26.0186	26.6502	18.7125	0.000618448	0.0765992	1.30437	0.383358	up
Tcan_09896	gnlWGS:JPKZTcan_09896_1s_mrna	Vesicular glutamate transporter 2 [Toxocara canis]	39.3292	40.272	37.7732	30.1035	30.3418	26.2281	0.000635916	0.0782041	1.35421	0.437456	up
Tcan_02920	gnlWGS:JPKZTcan_02920_1s_mrna	NFX1-type zinc finger-containing protein 1 [Toxocara canis]	3.3211	3.29119	2.14976	4.75867	5.97192	4.108	0.000665597	0.0812779	0.59049	-0.760016	down
Tcan_02735	gnlWGS:JPKZTcan_02735_1s_mrna	Uncharacterized protein C03F11.1 [Toxocara canis]	3.35793	2.94172	2.21269	4.84016	5.18205	3.53201	0.000675384	0.0818962	0.628021	-0.671116	down
Tcan_10122	gnlWGS:JPKZTcan_10122_1s_mrna	hypothetical protein Tcan_10122 [Toxocara canis]	0.395796	0.164372	0.160891	0	0	0	0.000680734	0.0819717	2403.53	11.2309	up
Tcan_11884	gnlWGS:JPKZTcan_11884_1s_mrna	Glycogen debranching enzyme [Toxocara canis]	25.5748	21.4498	17.0838	19.1802	18.7179	15.6272	0.000691794	0.0824243	1.19772	0.260293	up
Tcan_17655	gnlWGS:JPKZTcan_17655_1s_mrna	Actin-binding LIM protein 1 [Toxocara canis]	26.7355	24.949	20.1206	15.9345	17.8232	17.3126	0.000694	0.0824243	1.40601	0.491602	up
Tcan_05410	gnlWGS:JPKZTcan_05410_1s_mrna	nuclease domain-containing protein [Toxocara canis]	47.9468	42.3107	39.4651	32.7826	32.7686	31.6169	0.000724523	0.0854642	1.33503	0.416876	up
Tcan_17231	gnlWGS:JPKZTcan_17231_1s_mrna	Ras-related protein Rab-30 [Toxocara canis]	21.3063	18.9222	19.2872	10.5893	12.9528	13.1895	0.000737371	0.0863919	1.62028	0.696247	up
Tcan_06696	gnlWGS:JPKZTcan_06696_1s_mrna	Twitchin [Toxocara canis]	18.0533	12.012	14.4645	10.7293	11.5196	8.9047	0.000786517	0.0915315	1.42936	0.515371	up
Tcan_12457	gnlWGS:JPKZTcan_12457_1s_mrna	Glycine receptor subunit beta-type 4 [Toxocara canis]	22.4658	22.0685	17.6671	17.7271	19.3378	15.0014	0.000808433	0.0934548	1.19466	0.256598	up
Tcan_00342	gnlWGS:JPKZTcan_00342_1s_mrna	Protein FAM3C, partial [Toxocara canis]	17.3318	12.7472	12.6687	9.19246	10.8365	9.01615	0.000829085	0.0952075	1.47177	0.557552	up
Tcan_13293	gnlWGS:JPKZTcan_13293_1s_mrna	Zinc metalloproteinase nas-37 [Toxocara canis]	0	0	0	0.133573	0.616831	0.039522	0.000888763	0.101389	0.000379782	-11.3625	down
Tcan_00421	gnlWGS:JPKZTcan_00421_1s_mrna	CAD protein, partial [Toxocara canis]	9.76978	8.79135	6.29729	7.43811	7.30183	5.50257	0.000900129	0.102015	1.22803	0.296347	up
Tcan_08630	gnlWGS:JPKZTcan_08630_1s_mrna	Nuclear anchorage protein 1 [Toxocara canis]	67.3853	46.8927	43.9253	84.4055	85.6603	63.831	0.000915373	0.103069	0.676381	-0.564092	down
Tcan_05220	gnlWGS:JPKZTcan_05220_1s_mrna	Leucine-rich repeat serine/threonine-protein kinase 1 [Toxocara canis]	8.35958	6.63428	6.10914	6.03056	5.88934	3.84371	0.00092593	0.103585	1.33872	0.42085	up
Tcan_10123	gnlWGS:JPKZTcan_10123_1s_mrna	hypothetical protein Tcan_10123 [Toxocara canis]	38.0598	38.3278	19.7857	23.4045	22.7125	12.9692	0.000938981	0.104371	1.62768	0.702817	up
Tcan_00010	gnlWGS:JPKZTcan_00010_1s_mrna	hypothetical protein Tcan_00010 [Toxocara canis]	492.806	440.469	292.638	346.067	352.301	231.515	0.000961794	0.106226	1.31835	0.398735	up
Tcan_02371	gnlWGS:JPKZTcan_02371_1s_mrna	Mediator of RNA polymerase II transcription subunit 13 [Toxocara canis]	14.0369	14.7366	9.68906	10.0743	9.62892	6.32377	0.000989061	0.108546	1.47779	0.563445	up
Tcan_18311	gnlWGS:JPKZTcan_18311_1s_mrna	unnamed protein product [Toxocara canis]	0.164675	0.15414	0.214869	0.796308	1.7318	1.81073	0.00102168	0.111421	0.123002	-3.02325	down
Tcan_09672	gnlWGS:JPKZTcan_09672_1s_mrna	hypothetical protein Tcan_09672 [Toxocara canis]	18.9139	15.3061	14.6384	13.8789	14.4415	11.0604	0.00104527	0.113281	1.24067	0.311116	up
Tcan_18999	gnlWGS:JPKZTcan_18999_1s_mrna	26 kDa secreted antigen, partial [Toxocara canis]	1672.39	1895.29	2528.93	927.321	1005.59	1220.24	0.00106053	0.114221	1.9335	0.951216	up
Tcan_15949	gnlWGS:JPKZTcan_15949_1s_mrna	Serine/threonine-protein kinase par-1 [Toxocara canis]	64.0464	50.6607	52.0431	44.6308	44.9241	38.6868	0.00110405	0.11806	1.30028	0.378822	up
Tcan_00850	gnlWGS:JPKZTcan_00850_1s_mrna	hypothetical protein Tcan_00850, partial [Toxocara canis]	595.575	666.979	774.42	418.836	427.714	412.561	0.00111311	0.11806	1.61779	0.694023	up
Tcan_14063	gnlWGS:JPKZTcan_14063_1s_mrna	hypothetical protein Tcan_14063 [Toxocara canis]	1.74821	1.86774	2.91294	0.666208	0.557912	1.03276	0.0011166	0.11806	2.89288	1.53251	up
Tcan_08067	gnlWGS:JPKZTcan_08067_1s_mrna	Mannose-1-phosphate guanyltransferase beta [Toxocara canis]	29.573	32.3466	37.1421	20.7883	18.7955	20.0064	0.00115107	0.120967	1.66238	0.733253	up
Tcan_02623	gnlWGS:JPKZTcan_02623_1s_mrna	Zinc metalloproteinase nas-34 [Toxocara canis]	0	0	0	0.591401	0.23677	0.147249	0.00117109	0.122329	0.00030756	-11.6668	down
Tcan_03317	gnlWGS:JPKZTcan_03317_1s_mrna	Thioredoxin domain-containing protein 11 [Toxocara canis]	14.3781	11.8877	11.1408	10.9176	10.0863	8.56659	0.00121282	0.12593	1.265	0.339132	up
Tcan_18885	gnlWGS:JPKZTcan_18885_1s_mrna	Nanos -like protein 2 [Toxocara canis]	2.67888	1.89856	1.70403	0.92147	1.47862	1.21788	0.00125529	0.129564	1.73619	0.795922	up
Tcan_00443	gnlWGS:JPKZTcan_00443_1s_mrna	putative E3 ubiquitin-protein ligase HERC4, partial [Toxocara canis]	1.18963	0.179122	0.601192	0	0	0	0.00132624	0.136077	6566.48	12.6809	up
Tcan_08918	gnlWGS:JPKZTcan_08918_1s_mrna	hypothetical protein Tcan_08918 [Toxocara canis]	26.6191	26.409	20.3239	20.1903	17.5415	16.9639	0.00134524	0.137214	1.3411	0.423412	up
Tcan_02561	gnlWGS:JPKZTcan_02561_1s_mrna	Mannose-1-phosphate guanyltransferase beta [Toxocara canis]	63.0285	65.3534	75.7936	45.6282	45.6405	41.4111	0.00135563	0.137465	1.53886	0.621861	up
Tcan_02008	gnlWGS:JPKZTcan_02008_1s_mrna	Aldose 1-epimerase [Toxocara canis]	0.214861	0	0	1.17669	0.892637	0.971756	0.00136784	0.137897	0.0706528	-3.82311	down
Tcan_12782	gnlWGS:JPKZTcan_12782_1s_mrna	F-box protein SKP2A [Toxocara canis]	6.79935	6.74174	4.33484	9.53721	9.41044	7.85364	0.00141971	0.142299	0.66698	-0.584285	down
Tcan_14271	gnlWGS:JPKZTcan_14271_1s_mrna	Putative cuticle collagen [Toxocara canis]	0.17647	0.214231	0.885489	0	0	0.047014	0.00142831	0.142338	27.1449	4.76261	up
Tcan_15250	gnlWGS:JPKZTcan_15250_1s_mrna	unnamed protein product [Toxocara canis]	373.63	339.653	267.961	444.747	451.364	377.719	0.00149048	0.146818	0.770309	-0.37649	down
Tcan_13558	gnlWGS:JPKZTcan_13558_1s_mrna	Mucin-like protein Glc1.8b [Toxocara canis]	892.156	765.803	815.549	477.192	452.019	588.617	0.00149866	0.146818	1.62964	0.704551	up
Tcan_09305	gnlWGS:JPKZTcan_09305_1s_mrna	PDZ domain-containing protein 2 [Toxocara canis]	2.94162	2.17075	2.19747	1.64441	1.62973	1.04875	0.00149081	0.146818	1.69096	0.757846	up
Tcan_18939	gnlWGS:JPKZTcan_18939_1s_mrna	E3 ubiquitin-protein ligase UBR5 [Toxocara canis]	8.04883	7.14885	6.8997	6.24867	5.5155	5.06447	0.00156026	0.151993	1.31308	0.392957	up
Tcan_00851	gnlWGS:JPKZTcan_00851_1s_mrna	hypothetical protein Tcan_00850, partial [Toxocara canis]	586.359	664.414	756.743	421.121	423.062	418.057	0.00157195	0.152277	1.59044	0.669425	up
Tcan_15948	gnlWGS:JPKZTcan_15948_1s_mrna	hypothetical protein Tcan_15948 [Toxocara canis]	37.34	33.8836	27.2	28.9	26.5197	23.8275	0.00163037	0.157059	1.24198	0.312642	up
Tcan_05758	gnlWGS:JPKZTcan_05758_1s_mrna	R3H and coiled-coil domain-containing protein 1-like, partial [Toxocara canis]	45.1569	41.1531	36.0489	35.123	34.5115	30.8675	0.00167961	0.160324	1.21748	0.283896	up
Tcan_17522	gnlWGS:JPKZTcan_17522_1s_mrna	hypothetical protein Tcan_17522 [Toxocara canis]	15.8928	13.7815	11.091	11.3646	12.8715	9.1952	0.00168276	0.160324	1.21938	0.286147	up
Tcan_14345	gnlWGS:JPKZTcan_14345_1s_mrna	Lipid phosphate phosphohydrolase 3 [Toxocara canis]	5.3736	3.96041	3.29552	7.39237	6.83765	6.22747	0.00170337	0.161401	0.617355	-0.695828	down
Tcan_00693	gnlWGS:JPKZTcan_00693_1s_mrna	hypothetical protein Tcan_00693, partial [Toxocara canis]	0	0	0	0.88587	0.230655	0.586257	0.00174786	0.162946	0.000176182	-12.4706	down
Tcan_17797	gnlWGS:JPKZTcan_17797_1s_mrna	Vacuolar amino acid transporter 4 [Toxocara canis]	14.8442	16.0624	14.8714	9.00142	10.133	10.564	0.0017423	0.162946	1.54143	0.624271	up
Tcan_15456	gnlWGS:JPKZTcan_15456_1s_mrna	hypothetical protein Tcan_15456 [Toxocara canis]	2.26106	0	4.75136	0	0	0	0.00173188	0.162946	23374.7	14.5127	up
Tcan_15989	gnlWGS:JPKZTcan_15989_1s_mrna	LMBR1 domain-containing protein 2 -like protein [Toxocara canis]	8.11072	8.01437	6.71953	6.65682	6.87159	5.16709	0.00176694	0.163843	1.22193	0.289165	up
Tcan_04435	gnlWGS:JPKZTcan_04435_1s_mrna	Protein maternal effect lethal 26 [Toxocara canis]	10.3243	8.08092	7.38957	7.10514	6.92455	5.44539	0.00181289	0.16721	1.3245	0.405452	up
Tcan_08095	gnlWGS:JPKZTcan_08095_1s_mrna	Protein patched -like protein 1 [Toxocara canis]	17.5728	14.3926	12.7022	11.2395	12.7231	8.59304	0.00185339	0.170041	1.37204	0.45632	up
Tcan_02921	gnlWGS:JPKZTcan_02921_1s_mrna	Beta-1,4-N-acetylgalactosaminyltransferase bre-4 [Toxocara canis]	25.7796	21.9352	20.5409	19.3517	20.3289	13.809	0.00186547	0.170249	1.27606	0.351691	up
Tcan_12262	gnlWGS:JPKZTcan_12262_1s_mrna	Very low-density lipoprotein receptor [Toxocara canis]	41.7885	38.6919	37.7893	26.9939	29.1274	29.0255	0.001954	0.176648	1.38901	0.474056	up
Tcan_15153	gnlWGS:JPKZTcan_15153_1s_mrna	WD repeat and FYVE domain-containing protein 3 [Toxocara canis]	13.3505	10.3121	10.0872	8.40058	6.10133	7.41746	0.00195597	0.176648	1.53972	0.622672	up
Tcan_14970	gnlWGS:JPKZTcan_14970_1s_mrna	Zinc finger and SCAN domain-containing protein 12 [Toxocara canis]	1.17051	0.900021	0.800312	1.8579	2.01693	1.23564	0.00200326	0.179982	0.561758	-0.831978	down
Tcan_12915	gnlWGS:JPKZTcan_12915_1s_mrna	Protein phosphatase [Toxocara canis]	21.5838	18.424	15.0657	16.3587	17.6076	11.7702	0.00205757	0.182309	1.20414	0.268008	up
Tcan_04783	gnlWGS:JPKZTcan_04783_1s_mrna	Eukaryotic translation initiation factor 4E transporter [Toxocara canis]	7.246	5.72174	5.24702	4.9032	5.27072	4.19798	0.00204376	0.182309	1.26739	0.341857	up
Tcan_17238	gnlWGS:JPKZTcan_17238_1s_mrna	Collectin-12 [Toxocara canis]	5.00617	6.1228	4.32378	3.59457	3.19954	1.99302	0.0020607	0.182309	1.75857	0.814399	up
Tcan_13549	gnlWGS:JPKZTcan_13549_1s_mrna	Ryanodine receptor 44F [Toxocara canis]	7.42351	3.93647	3.50463	3.41193	3.01775	2.46016	0.00217686	0.19064	1.67209	0.741654	up
Tcan_06699	gnlWGS:JPKZTcan_06699_1s_mrna	Twitchin [Toxocara canis]	7.76317	7.10121	9.81849	3.45569	4.58361	5.13377	0.002174	0.19064	1.87374	0.905918	up
Tcan_05398	gnlWGS:JPKZTcan_05398_1s_mrna	hypothetical protein Tcan_05398 [Toxocara canis]	16.678	14.946	9.06133	22.658	23.3797	16.8258	0.00223897	0.194965	0.647201	-0.627715	down
Tcan_02358	gnlWGS:JPKZTcan_02358_1s_mrna	hypothetical protein Tcan_02358 [Toxocara canis]	2.55488	1.05564	0	0	0	0	0.00224873	0.194965	12035.1	13.555	up
Tcan_08952	gnlWGS:JPKZTcan_08952_1s_mrna	Mannose-1-phosphate guanyltransferase alpha-A [Toxocara canis]	31.2528	29.8171	28.4488	21.2037	23.8782	21.672	0.00228754	0.197343	1.34103	0.423337	up
Tcan_14791	gnlWGS:JPKZTcan_14791_1s_mrna	RGM domain family member B [Toxocara canis]	7.5951	7.83202	6.00202	5.29224	5.47999	5.12961	0.00245128	0.210422	1.34759	0.43038	up
Tcan_14725	gnlWGS:JPKZTcan_14725_1s_mrna	putative G-protein coupled receptor [Toxocara canis]	15.6345	12.1333	9.83266	17.7474	19.8795	15.2233	0.00246559	0.210608	0.711455	-0.491156	down
Tcan_10447	gnlWGS:JPKZTcan_10447_1s_mrna	60 kDa SS-A/Ro ribonucleo-like protein [Toxocara canis]	26.7138	25.5421	22.1003	21.537	21.0912	18.475	0.00251185	0.213507	1.2169	0.283206	up
Tcan_00614	gnlWGS:JPKZTcan_00614_1s_mrna	hypothetical protein Tcan_00614, partial [Toxocara canis]	10.7508	7.99058	7.57137	6.27944	6.64172	6.0233	0.00252586	0.213651	1.38894	0.473985	up
Tcan_11889	gnlWGS:JPKZTcan_11889_1s_mrna	hypothetical protein Tcan_11889 [Toxocara canis]	2.49513	1.90006	2.05731	4.26141	5.29201	2.87337	0.00267461	0.220102	0.519242	-0.945522	down
Tcan_05115	gnlWGS:JPKZTcan_05115_1s_mrna	putative S-adenosylmethionine synthase 4 [Toxocara canis]	308.06	259.752	204.303	232.175	255.917	191.888	0.00267829	0.220102	1.1355	0.183324	up
Tcan_15865	gnlWGS:JPKZTcan_15865_1s_mrna	hypothetical protein Tcan_15865 [Toxocara canis]	49.5074	46.2609	34.5973	38.7692	36.8471	31.3079	0.00263972	0.220102	1.21923	0.285975	up
Tcan_03079	gnlWGS:JPKZTcan_03079_1s_mrna	Valine--tRNA ligase [Toxocara canis]	24.0325	24.6065	19.2403	19.1062	18.4673	15.2379	0.00266056	0.220102	1.28532	0.362124	up
Tcan_04799	gnlWGS:JPKZTcan_04799_1s_mrna	5'-3' exoribonuclease 1 [Toxocara canis]	6.00563	4.86556	3.59392	4.04364	3.5693	2.3581	0.00265553	0.220102	1.45071	0.53676	up
Tcan_07951	gnlWGS:JPKZTcan_07951_1s_mrna	hypothetical protein Tcan_07951 [Toxocara canis]	2.73175	0	2.5726	0	0	0	0.00262707	0.220102	17681.1	14.1099	up
Tcan_17255	gnlWGS:JPKZTcan_17255_1s_mrna	putative V-type proton ATPase subunit [Toxocara canis]	26.0547	21.7624	20.3055	16.986	17.9547	15.1038	0.00276951	0.226525	1.36124	0.444921	up
Tcan_04808	gnlWGS:JPKZTcan_04808_1s_mrna	hypothetical protein Tcan_04808 [Toxocara canis]	7.68126	7.09314	5.76716	5.76992	6.08861	4.09699	0.00286807	0.233485	1.28743	0.36449	up
Tcan_05246	gnlWGS:JPKZTcan_05246_1s_mrna	hypothetical protein Tcan_05246 [Toxocara canis]	3.18147	3.28067	2.35397	5.53584	5.28548	3.71231	0.00299057	0.24232	0.6066	-0.721182	down
Tcan_03919	gnlWGS:JPKZTcan_03919_1s_mrna	Histone-lysine N-methyltransferase 2E [Toxocara canis]	16.6613	12.6439	11.8923	12.0163	11.0514	6.32652	0.00306974	0.246053	1.40155	0.487024	up
Tcan_15442	gnlWGS:JPKZTcan_15442_1s_mrna	Hyaluronidase-4 [Toxocara canis]	17.5575	17.9121	7.35236	8.92516	8.87854	7.22431	0.00307921	0.246053	1.71096	0.774808	up
Tcan_01995	gnlWGS:JPKZTcan_01995_1s_mrna	CUB and sushi domain-containing protein 3 [Toxocara canis]	202.492	218.811	276.817	132.463	115.918	152.42	0.00305851	0.246053	1.74181	0.80059	up
Tcan_03684	gnlWGS:JPKZTcan_03684_1s_mrna	unnamed protein product [Toxocara canis]	0.959739	0.633272	0.741959	1.7801	2.12263	1.47251	0.00314572	0.24609	0.434395	-1.20292	down
Tcan_13084	gnlWGS:JPKZTcan_13084_1s_mrna	Cytochrome P450 3A31 [Toxocara canis]	0.430705	0.241918	0.303189	0.792026	0.80666	0.625722	0.00315064	0.24609	0.438684	-1.18875	down
Tcan_05436	gnlWGS:JPKZTcan_05436_1s_mrna	unnamed protein product [Toxocara canis]	39.1698	33.3901	30.0161	48.1258	50.6141	39.6042	0.00309845	0.24609	0.741455	-0.431568	down
Tcan_05267	gnlWGS:JPKZTcan_05267_1s_mrna	Serine/arginine repetitive matrix protein 2 [Toxocara canis]	27.8751	23.3126	20.3239	22.3586	21.8042	17.728	0.00314333	0.24609	1.15545	0.208456	up
Tcan_11021	gnlWGS:JPKZTcan_11021_1s_mrna	Mesocentin [Toxocara canis]	2.15954	1.73065	2.38157	1.35376	1.10465	1.34929	0.00310944	0.24609	1.64713	0.719955	up
Tcan_02779	gnlWGS:JPKZTcan_02779_1s_mrna	hypothetical protein Tcan_02779 [Toxocara canis]	92.8248	68.3092	45.6113	51.9134	49.649	45.1245	0.00317393	0.246798	1.40943	0.495114	up
Tcan_02749	gnlWGS:JPKZTcan_02749_1s_mrna	Heparan sulfate glucosamine 3-O-sulfotransferase 5 [Toxocara canis]	9.99407	7.49678	6.44041	11.5176	12.9168	11.0282	0.00318914	0.246874	0.674832	-0.567401	down
Tcan_17850	gnlWGS:JPKZTcan_17850_1s_mrna	Protein angel -like protein 2, partial [Toxocara canis]	5.50942	4.98691	3.03811	10.1453	8.27948	6.44335	0.00327117	0.24734	0.544248	-0.877664	down
Tcan_10136	gnlWGS:JPKZTcan_10136_1s_mrna	Fibronectin type-III domain-containing protein 3a [Toxocara canis]	29.9681	26.1535	20.8595	24.3888	23.5592	19.6369	0.00321602	0.24734	1.13903	0.187803	up
Tcan_05964	gnlWGS:JPKZTcan_05964_1s_mrna	Filamin-C [Toxocara canis]	12.5483	10.2553	9.13636	9.38427	10.0972	7.76801	0.00328075	0.24734	1.17213	0.229135	up
Tcan_16844	gnlWGS:JPKZTcan_16844_1s_mrna	AT-rich interactive domain-containing protein cfi-1 [Toxocara canis]	14.0816	11.9938	8.77785	9.72282	9.92178	7.3399	0.00326811	0.24734	1.2916	0.369159	up
Tcan_13267	gnlWGS:JPKZTcan_13267_1s_mrna	Guanine nucleotide-binding proteinG(i) subunit alpha [Toxocara canis]	40.8158	38.1594	37.5399	29.2601	31.5192	28.3068	0.00326689	0.24734	1.3079	0.387247	up
Tcan_01763	gnlWGS:JPKZTcan_01763_1s_mrna	hypothetical protein Tcan_01763, partial [Toxocara canis]	1.55573	0	1.4514	0	0	0	0.003236	0.24734	10023.8	13.2911	up
Tcan_11630	gnlWGS:JPKZTcan_11630_1s_mrna	RNA-binding protein Musashi -like protein Rbp6 [Toxocara canis]	50.2417	45.1335	35.6789	41.5927	42.2552	31.3519	0.00339228	0.249663	1.13762	0.186024	up
Tcan_03992	gnlWGS:JPKZTcan_03992_1s_mrna	Neuroglian [Toxocara canis]	54.4122	42.6223	36.9358	40.9625	42.0493	32.4654	0.00334305	0.249663	1.16015	0.214306	up
Tcan_18802	gnlWGS:JPKZTcan_18802_1s_mrna	hypothetical protein Tcan_18802 [Toxocara canis]	33.9782	27.728	21.2678	23.4301	26.8004	19.9051	0.00341128	0.249663	1.18305	0.242511	up
Tcan_06948	gnlWGS:JPKZTcan_06948_1s_mrna	Protein cbp-1 [Toxocara canis]	20.935	16.6346	13.2949	14.8727	16.1007	11.9968	0.00338194	0.249663	1.18372	0.243327	up
Tcan_14857	gnlWGS:JPKZTcan_14857_1s_mrna	Homeobox protein ceh-38 [Toxocara canis]	12.9097	10.5385	11.0343	9.70537	9.45022	7.79575	0.00335795	0.249663	1.27944	0.355508	up
Tcan_16360	gnlWGS:JPKZTcan_16360_1s_mrna	B-box type zinc finger protein ncl-1 [Toxocara canis]	85.7923	79.2484	78.1387	60.5795	63.8325	60.5461	0.00341235	0.249663	1.31478	0.394822	up
Tcan_04772	gnlWGS:JPKZTcan_04772_1s_mrna	Phospholipase B1, membrane-associated [Toxocara canis]	2.49804	2.80235	2.37068	2.11959	2.02198	1.59574	0.00339541	0.249663	1.33705	0.419055	up
Tcan_05823	gnlWGS:JPKZTcan_05823_1s_mrna	hypothetical protein Tcan_05823 [Toxocara canis]	28.1784	22.0128	16.5093	35.7403	34.6564	26.0778	0.00353599	0.257511	0.69138	-0.53245	down
Tcan_18758	gnlWGS:JPKZTcan_18758_1s_mrna	Wiskott-Aldrich syndrome protein [Toxocara canis]	15.1388	11.6491	8.9377	9.66802	8.68369	7.61997	0.00354932	0.257511	1.37556	0.460017	up
Tcan_07239	gnlWGS:JPKZTcan_07239_1s_mrna	Putative cysteine proteinase [Toxocara canis]	32.1918	30.6847	19.1173	42.8257	41.4225	37.2158	0.00359456	0.259707	0.675046	-0.566941	down
Tcan_07580	gnlWGS:JPKZTcan_07580_1s_mrna	Nucleolysin TIAR [Toxocara canis]	51.6182	48.9464	46.8813	30.6439	31.0726	37.0828	0.00361018	0.259753	1.49238	0.577612	up
Tcan_13001	gnlWGS:JPKZTcan_13001_1s_mrna	hypothetical protein Tcan_13001 [Toxocara canis]	0.524048	0.210204	0.278119	0	0	0	0.00363177	0.260227	3374.57	11.7205	up
Tcan_10746	gnlWGS:JPKZTcan_10746_1s_mrna	hypothetical protein Tcan_10746 [Toxocara canis]	36.6206	33.7357	29.7956	29.4302	30.2519	25.5069	0.00366159	0.261284	1.17564	0.233449	up
Tcan_02137	gnlWGS:JPKZTcan_02137_1s_mrna	Cytosolic non-specific dipeptidase, partial [Toxocara canis]	82.625	74.9638	59.5994	98.4048	104.202	80.6693	0.0037361	0.265508	0.766701	-0.383264	down
Tcan_12528	gnlWGS:JPKZTcan_12528_1s_mrna	Mitochondrial sodium/hydrogen exchanger 9B2 [Toxocara canis]	21.4107	15.8302	12.1783	13.6317	14.6634	9.6967	0.00378597	0.267954	1.30079	0.379386	up
Tcan_06037	gnlWGS:JPKZTcan_06037_1s_mrna	hypothetical protein Tcan_06037 [Toxocara canis]	15.5005	12.2973	10.9112	20.1478	20.8354	14.212	0.00385124	0.271466	0.70131	-0.511876	down
Tcan_06822	gnlWGS:JPKZTcan_06822_1s_mrna	Putative alpha-1,3-mannosyl-glycoprotein 2-beta-N-acetylglucosaminyltransferase [Toxocara canis]	16.6924	16.1343	13.0318	12.6426	11.7496	11.5292	0.00393836	0.275757	1.27663	0.352339	up
Tcan_02501	gnlWGS:JPKZTcan_02501_1s_mrna	Dihydropyrimidine dehydrogenase [NADP(+)] [Toxocara canis]	44.4758	42.3913	41.111	31.2935	35.3172	30.9971	0.00394392	0.275757	1.31115	0.390829	up
Tcan_00918	gnlWGS:JPKZTcan_00918_1s_mrna	hypothetical protein Tcan_00918, partial [Toxocara canis]	10.6509	8.89717	7.03578	16.4865	15.0106	11.0348	0.00400427	0.278852	0.625032	-0.677998	down
Tcan_00931	gnlWGS:JPKZTcan_00931_1s_mrna	hypothetical protein Tcan_00931, partial [Toxocara canis]	152.084	132.404	118.002	185.205	202.36	148.824	0.00408988	0.283309	0.75037	-0.414326	down
Tcan_17024	gnlWGS:JPKZTcan_17024_1s_mrna	Uncharacterized protein Tcan_17024 [Toxocara canis]	11.9787	11.6406	9.97822	8.85305	8.83474	8.55024	0.00410095	0.283309	1.28049	0.356694	up
Tcan_02955	gnlWGS:JPKZTcan_02955_1s_mrna	Cyclin-B1-2 [Toxocara canis]	0	0	0	0.063893	0.170597	0.15821	0.00418107	0.287697	0.000763942	-10.3542	down
Tcan_07830	gnlWGS:JPKZTcan_07830_1s_mrna	Uncharacterized protein F54F2.2, isoform a [Toxocara canis]	26.6093	22.1951	19.5686	16.651	20.0072	17.0656	0.00425297	0.29043	1.27267	0.347863	up
Tcan_06735	gnlWGS:JPKZTcan_06735_1s_mrna	TBC1 domain family member 2B [Toxocara canis]	9.43315	7.21394	3.56459	4.61848	4.55892	2.37782	0.00425427	0.29043	1.74914	0.806645	up
Tcan_07124	gnlWGS:JPKZTcan_07124_1s_mrna	hypothetical protein Tcan_07124 [Toxocara canis]	5.58793	3.99009	3.88444	8.99088	7.46481	6.18965	0.00430268	0.291439	0.594492	-0.750271	down
Tcan_14628	gnlWGS:JPKZTcan_14628_1s_mrna	B-cell lymphoma/leukemia 11B, partial [Toxocara canis]	17.2095	16.7371	13.7768	13.524	15.2702	11.7846	0.0042967	0.291439	1.17607	0.233969	up
Tcan_17017	gnlWGS:JPKZTcan_17017_1s_mrna	La-related protein 1 [Toxocara canis]	36.3723	32.642	31.2066	25.3912	27.7423	25.5336	0.0044156	0.297924	1.27399	0.34935	up
Tcan_02586	gnlWGS:JPKZTcan_02586_1s_mrna	Aspartyl protease inhibitor, partial [Toxocara canis]	41.5439	31.9537	22.2807	51.3036	51.0216	37.3367	0.00445296	0.29928	0.685788	-0.544166	down
Tcan_14992	gnlWGS:JPKZTcan_14992_1s_mrna	Feeding circuit activating protein [Toxocara canis]	7.30774	6.43917	6.17573	5.64629	5.57129	4.84977	0.00448899	0.300537	1.23995	0.310277	up
Tcan_10138	gnlWGS:JPKZTcan_10138_1s_mrna	putative G-protein coupled receptor C02B8.5 [Toxocara canis]	1.62746	1.50361	0.924439	2.12301	3.86127	2.24002	0.00450926	0.300733	0.493113	-1.02001	down
Tcan_08065	gnlWGS:JPKZTcan_08065_1s_mrna	Vigilin [Toxocara canis]	54.0248	44.7423	30.5395	37.858	37.8945	28.9772	0.00457567	0.303771	1.23467	0.304125	up
Tcan_02741	gnlWGS:JPKZTcan_02741_1s_mrna	Papilin [Toxocara canis]	22.4651	15.9071	11.4891	13.2876	14.0882	9.04995	0.00458985	0.303771	1.36885	0.452963	up
Tcan_15157	gnlWGS:JPKZTcan_15157_1s_mrna	WD repeat and FYVE domain-containing protein 3 [Toxocara canis]	10.5805	8.81273	8.31555	7.31053	7.47372	7.10623	0.00476675	0.314279	1.26579	0.340041	up
Tcan_07261	gnlWGS:JPKZTcan_07261_1s_mrna	JNK1/MAPK8-associated membrane protein [Toxocara canis]	13.9532	11.7205	11.0295	10.4676	11.3081	7.61689	0.00480019	0.315285	1.24872	0.320454	up
Tcan_18582	gnlWGS:JPKZTcan_18582_1s_mrna	hypothetical protein Tcan_18582 [Toxocara canis]	4.18153	2.84516	2.05137	2.06435	2.0327	1.05195	0.00485363	0.317592	1.76307	0.818091	up
Tcan_13786	gnlWGS:JPKZTcan_13786_1s_mrna	SWI/SNF-related matrix-associated actin-dependent regulator of chromatin subfamily D member 1 [Toxocara canis]	17.1125	15.3867	13.8125	13.3876	13.2046	11.5988	0.00487952	0.318086	1.21264	0.278146	up
Tcan_07194	gnlWGS:JPKZTcan_07194_1s_mrna	Titin [Toxocara canis]	1.17137	1.1744	1.58779	0.566873	0.565541	0.75192	0.00495487	0.321788	2.08751	1.06178	up
Tcan_18819	gnlWGS:JPKZTcan_18819_1s_mrna	hypothetical protein Tcan_18819 [Toxocara canis]	6.39094	5.55093	3.87052	4.41134	4.31388	2.72963	0.0050357	0.3257	1.38041	0.465097	up
Tcan_02505	gnlWGS:JPKZTcan_02505_1s_mrna	E3 ubiquitin-protein ligase HECTD1 [Toxocara canis]	22.4977	21.9711	23.3025	16.4647	16.5145	15.6747	0.00505267	0.3257	1.39293	0.47812	up
Tcan_06744	gnlWGS:JPKZTcan_06744_1s_mrna	S-phase kinase-associated protein 2 [Toxocara canis]	2.86369	3.19022	1.8419	4.43046	4.30828	3.88507	0.00509723	0.327355	0.62547	-0.676987	down
Tcan_05390	gnlWGS:JPKZTcan_05390_1s_mrna	UPF0046 protein T07D4.2 [Toxocara canis]	124.8	105.09	78.9016	141.334	147.434	111.055	0.00512816	0.328126	0.77232	-0.37273	down
Tcan_18534	gnlWGS:JPKZTcan_18534_1s_mrna	Dihydropyrimidine dehydrogenase [NADP(+)] [Toxocara canis]	92.3566	92.4732	74.2328	121.15	123.053	112.29	0.00519384	0.330816	0.726699	-0.46057	down
Tcan_15324	gnlWGS:JPKZTcan_15324_1s_mrna	Phosphatidylinositol phosphatase PTPRQ [Toxocara canis]	17.6504	12.6565	10.9701	11.9077	12.5238	7.59918	0.00520835	0.330816	1.28867	0.365883	up
Tcan_07241	gnlWGS:JPKZTcan_07241_1s_mrna	hypothetical protein Tcan_07241 [Toxocara canis]	12.838	9.72492	5.46001	16.7065	16.8459	12.7896	0.00534248	0.337398	0.604697	-0.725715	down
Tcan_09158	gnlWGS:JPKZTcan_09158_1s_mrna	Vacuolar protein sorting-associated protein 52 -like protein [Toxocara canis]	33.3226	29.1459	17.5439	22.6105	22.097	15.8459	0.00535089	0.337398	1.32135	0.402015	up
Tcan_14375	gnlWGS:JPKZTcan_14375_1s_mrna	Insulin-like receptor [Toxocara canis]	14.1782	13.2687	13.173	10.1011	9.98509	9.82896	0.00548599	0.344663	1.35784	0.44131	up
Tcan_06790	gnlWGS:JPKZTcan_06790_1s_mrna	Glycoprotein-N-acetylgalactosamine 3-beta-galactosyltransferase 1 [Toxocara canis]	39.3984	43.2449	32.1986	32.193	28.8607	28.4415	0.00558614	0.349688	1.28322	0.359766	up
Tcan_04763	gnlWGS:JPKZTcan_04763_1s_mrna	putative methylenetetrahydrofolate reductase [Toxocara canis]	60.1893	61.1456	54.9411	46.2837	46.7019	44.8861	0.00563231	0.350221	1.27855	0.35451	up
Tcan_08230	gnlWGS:JPKZTcan_08230_1s_mrna	hypothetical protein Tcan_08230 [Toxocara canis]	9.37457	7.41261	7.3071	5.67704	7.06796	4.67985	0.00563504	0.350221	1.38275	0.467545	up
Tcan_03717	gnlWGS:JPKZTcan_03717_1s_mrna	N-alpha-acetyltransferase 30 [Toxocara canis]	31.8041	27.5757	24.6803	24.9554	27.2322	19.1914	0.00566394	0.35076	1.17766	0.235922	up
Tcan_16340	gnlWGS:JPKZTcan_16340_1s_mrna	hypothetical protein Tcan_16340 [Toxocara canis]	8.55904	8.11164	6.63679	6.11947	6.6121	3.79717	0.00570806	0.352234	1.41012	0.495815	up
Tcan_05493	gnlWGS:JPKZTcan_05493_1s_mrna	Polypeptide N-acetylgalactosaminyltransferase 5 [Toxocara canis]	50.0264	43.2183	32.402	33.9384	38.935	30.6565	0.00576372	0.354407	1.21363	0.279324	up
Tcan_09606	gnlWGS:JPKZTcan_09606_1s_mrna	Cholecystokinin receptor type A [Toxocara canis]	9.50999	7.55543	6.01672	11.0055	12.125	9.27489	0.00581768	0.355206	0.712293	-0.489457	down
Tcan_18202	gnlWGS:JPKZTcan_18202_1s_mrna	Uncharacterized protein Tcan_18202 [Toxocara canis]	21.8431	18.2104	16.9544	16.3183	18.37	14.221	0.0058131	0.355206	1.16559	0.221056	up
Tcan_01159	gnlWGS:JPKZTcan_01159_1s_mrna	hypothetical protein Tcan_01159, partial [Toxocara canis]	15.949	13.0803	10.1159	18.1744	20.5799	17.2394	0.00588604	0.358119	0.699099	-0.516431	down
Tcan_12243	gnlWGS:JPKZTcan_12243_1s_mrna	Serine/threonine-protein kinase smg-1 [Toxocara canis]	23.5647	20.3369	18.31	18.3014	18.723	16.2308	0.00595404	0.359732	1.16818	0.224261	up
Tcan_02822	gnlWGS:JPKZTcan_02822_1s_mrna	hypothetical protein Tcan_02822 [Toxocara canis]	43.7752	39.5984	25.3139	31.1952	28.1738	19.1169	0.00595355	0.359732	1.3848	0.469682	up
Tcan_18287	gnlWGS:JPKZTcan_18287_1s_mrna	hypothetical protein Tcan_18287 [Toxocara canis]	146.226	151.339	120.882	121.517	121.16	107.796	0.00599729	0.361087	1.19395	0.255738	up
Tcan_11308	gnlWGS:JPKZTcan_11308_1s_mrna	Zinc finger SWIM domain-containing protein 8 [Toxocara canis]	20.3733	17.7345	16.2742	15.9193	17.8203	13.4216	0.00607587	0.364552	1.15311	0.205528	up
Tcan_16874	gnlWGS:JPKZTcan_16874_1s_mrna	Ataxin-2-like protein [Toxocara canis]	17.0434	15.6647	14.5601	13.1358	14.3739	11.9072	0.00618571	0.36728	1.19919	0.262054	up
Tcan_07950	gnlWGS:JPKZTcan_07950_1s_mrna	Low-density lipoprotein receptor-related protein 1B [Toxocara canis]	5.76222	5.88403	4.60345	4.49282	4.77688	3.61205	0.00619492	0.36728	1.26145	0.335084	up
Tcan_17168	gnlWGS:JPKZTcan_17168_1s_mrna	hypothetical protein Tcan_17168 [Toxocara canis]	14.2961	14.5185	15.6417	10.84	11.6986	9.53125	0.00620605	0.36728	1.38623	0.471172	up
Tcan_02127	gnlWGS:JPKZTcan_02127_1s_mrna	Transmembrane protein [Toxocara canis]	9.53051	8.15004	5.0391	5.12752	5.082	2.53225	0.00615695	0.36728	1.78308	0.834375	up
Tcan_11446	gnlWGS:JPKZTcan_11446_1s_mrna	hypothetical protein Tcan_11446 [Toxocara canis]	10.7584	8.92394	8.19807	7.21061	8.51672	6.62551	0.00636775	0.375567	1.24729	0.318794	up
Tcan_05776	gnlWGS:JPKZTcan_05776_1s_mrna	Band 4.1-like protein 1 [Toxocara canis]	27.2429	20.6135	18.637	16.49	20.7497	14.5922	0.00641043	0.376803	1.28287	0.35937	up
Tcan_12764	gnlWGS:JPKZTcan_12764_1s_mrna	putative coatomer subunit beta' [Toxocara canis]	33.4725	29.3765	35.1274	21.8484	21.7908	23.8453	0.00677004	0.396597	1.45184	0.537881	up
Tcan_03977	gnlWGS:JPKZTcan_03977_1s_mrna	Defective pharyngeal development protein 4 [Toxocara canis]	15.9916	13.1467	9.32757	10.8486	10.9533	9.18041	0.00686104	0.400574	1.24154	0.312135	up
Tcan_08463	gnlWGS:JPKZTcan_08463_1s_mrna	Putative neutral sphingomyelinase [Toxocara canis]	21.0674	21.3869	16.358	17.835	18.5677	14.0361	0.00695657	0.403435	1.16601	0.221583	up
Tcan_04578	gnlWGS:JPKZTcan_04578_1s_mrna	Sodium-dependent glucose transporter 1 [Toxocara canis]	15.4389	13.0219	12.2515	11.5214	13.0067	9.94343	0.00695592	0.403435	1.18104	0.240056	up
Tcan_09320	gnlWGS:JPKZTcan_09320_1s_mrna	RNA-binding protein sym-2 [Toxocara canis]	33.9564	37.2015	36.5104	25.9477	22.0622	26.046	0.00700777	0.405049	1.45388	0.539906	up
Tcan_13333	gnlWGS:JPKZTcan_13333_1s_mrna	unnamed protein product [Toxocara canis]	8.62358	6.73198	5.24063	9.24636	11.9897	9.51998	0.00708207	0.406633	0.669663	-0.578493	down
Tcan_07479	gnlWGS:JPKZTcan_07479_1s_mrna	E3 ubiquitin-protein ligase UBR3 [Toxocara canis]	3.73492	2.34697	2.42786	1.39563	2.21666	1.52185	0.00707157	0.406633	1.65748	0.728994	up
Tcan_08258	gnlWGS:JPKZTcan_08258_1s_mrna	Gonadotropin-releasing hormone II receptor [Toxocara canis]	2.74971	2.76644	1.92853	4.12003	5.13774	3.13576	0.00723465	0.412234	0.600691	-0.735304	down
Tcan_07244	gnlWGS:JPKZTcan_07244_1s_mrna	hypothetical protein Tcan_07244 [Toxocara canis]	4.94842	4.08214	2.64713	6.24681	6.7964	4.87525	0.00725095	0.412234	0.651713	-0.617691	down
Tcan_10322	gnlWGS:JPKZTcan_10322_1s_mrna	Exportin-5 [Toxocara canis]	7.91186	7.31898	6.02189	6.1386	6.45871	3.73149	0.0072443	0.412234	1.30155	0.380229	up
Tcan_15354	gnlWGS:JPKZTcan_15354_1s_mrna	KH domain-containing protein C56G2.1 [Toxocara canis]	52.6986	47.4926	44.4002	43.5232	40.8863	36.143	0.00751418	0.425804	1.19941	0.262321	up
Tcan_09645	gnlWGS:JPKZTcan_09645_1s_mrna	Endoplasmic reticulum lectin 1 [Toxocara canis]	20.2788	21.3633	17.9767	16.0929	16.3885	15.1365	0.00757257	0.427004	1.25203	0.324266	up
Tcan_03338	gnlWGS:JPKZTcan_03338_1s_mrna	hypothetical protein Tcan_03338 [Toxocara canis]	7.23142	3.74689	2.91583	2.4129	2.83204	1.64799	0.00758461	0.427004	2.01571	1.01129	up
Tcan_11215	gnlWGS:JPKZTcan_11215_1s_mrna	Multidrug resistance protein pgp-3 [Toxocara canis]	15.3802	14.0713	11.9204	12.8854	13.6526	9.09298	0.00762778	0.427409	1.16112	0.215523	up
Tcan_04213	gnlWGS:JPKZTcan_04213_1s_mrna	putative tyrosine-protein phosphatase cdc-14 [Toxocara canis]	9.2701	7.8681	7.00481	6.7823	7.69989	5.83869	0.0076411	0.427409	1.18809	0.248643	up
Tcan_17030	gnlWGS:JPKZTcan_17030_1s_mrna	Polypeptide N-acetylgalactosaminyltransferase 3 [Toxocara canis]	11.1607	11.9883	11.5629	9.15817	9.12037	8.11583	0.00774567	0.430481	1.31513	0.3952	up
Tcan_00598	gnlWGS:JPKZTcan_00598_1s_mrna	hypothetical protein Tcan_00598, partial [Toxocara canis]	9.16584	9.24136	8.16226	6.58727	7.75349	4.39781	0.00773385	0.430481	1.4179	0.503758	up
Tcan_09665	gnlWGS:JPKZTcan_09665_1s_mrna	hypothetical protein Tcan_09665 [Toxocara canis]	1.32836	1.25629	0.571744	2.16153	2.37986	1.3079	0.00780419	0.431091	0.539619	-0.889987	down
Tcan_14170	gnlWGS:JPKZTcan_14170_1s_mrna	hypothetical protein Tcan_14170 [Toxocara canis]	29.0643	24.4565	17.2663	19.5035	16.9949	16.2805	0.00780638	0.431091	1.3412	0.423529	up
Tcan_07340	gnlWGS:JPKZTcan_07340_1s_mrna	Ig-like and fibronectin type-III domain-containing protein C25G4.10 [Toxocara canis]	18.7369	15.9264	13.5091	15.1038	14.187	11.3148	0.00802162	0.441571	1.18635	0.246531	up
Tcan_08342	gnlWGS:JPKZTcan_08342_1s_mrna	Ankyrin repeat domain-containing protein 50 [Toxocara canis]	2.66869	2.05858	2.92534	6.96461	5.81474	3.34958	0.00814264	0.446814	0.474464	-1.07563	down
Tcan_12898	gnlWGS:JPKZTcan_12898_1s_mrna	Wings apart-like -like protein [Toxocara canis]	11.3182	10.3698	7.73052	8.38983	9.22216	6.56867	0.00822093	0.449687	1.21661	0.282872	up
Tcan_10132	gnlWGS:JPKZTcan_10132_1s_mrna	Cuticlin-1 [Toxocara canis]	0.546371	0.26057	0	0	0	0	0.00827022	0.450961	2689.8	11.3933	up
Tcan_05907	gnlWGS:JPKZTcan_05907_1s_mrna	PCTP-like protein [Toxocara canis]	18.4095	16.3427	10.9833	12.7974	12.8652	10.854	0.00834029	0.453356	1.25246	0.324768	up
Tcan_00630	gnlWGS:JPKZTcan_00630_1s_mrna	Uncharacterized protein K02A2.6, partial [Toxocara canis]	12.112	12.5208	12.9084	10.8624	7.90246	6.82478	0.00836907	0.453499	1.46705	0.552918	up
Tcan_17532	gnlWGS:JPKZTcan_17532_1s_mrna	Hemicentin-1 [Toxocara canis]	1.91777	1.59	1.55773	1.37106	1.45369	1.12032	0.00863293	0.466339	1.28401	0.360656	up
Tcan_18541	gnlWGS:JPKZTcan_18541_1s_mrna	Cell division control protein 2 -like protein D [Toxocara canis]	0	0	0	0	0.448153	0.135649	0.00867748	0.46729	0.000513873	-10.9263	down
Tcan_09366	gnlWGS:JPKZTcan_09366_1s_mrna	Vacuolar protein sorting-associated protein 13C [Toxocara canis]	0	0.036881	0	0.179273	0.190301	0.083528	0.0087975	0.469864	0.0813967	-3.61889	down
Tcan_05778	gnlWGS:JPKZTcan_05778_1s_mrna	Protein 4.1 -like protein [Toxocara canis]	83.0191	54.0027	43.9298	93.8437	99.3046	69.2786	0.00882603	0.469864	0.689532	-0.536311	down
Tcan_16064	gnlWGS:JPKZTcan_16064_1s_mrna	Signal peptide peptidase-like 2B [Toxocara canis]	25.2075	24.1489	20.8463	21.8507	22.7455	16.7655	0.00883897	0.469864	1.14408	0.194186	up
Tcan_18286	gnlWGS:JPKZTcan_18286_1s_mrna	hypothetical protein Tcan_18286 [Toxocara canis]	11.7046	11.7338	11.6786	8.04682	9.75773	8.47481	0.00886076	0.469864	1.3363	0.418242	up
Tcan_04487	gnlWGS:JPKZTcan_04487_1s_mrna	Diencephalon/mesencephalon homeobox protein 1-B [Toxocara canis]	8.24608	6.17484	7.85282	5.58116	5.65423	3.18519	0.0088159	0.469864	1.54458	0.627214	up
Tcan_11897	gnlWGS:JPKZTcan_11897_1s_mrna	unnamed protein product [Toxocara canis]	40.4707	42.254	29.8661	54.873	52.9198	44.3455	0.0089649	0.473937	0.740056	-0.434294	down
Tcan_02947	gnlWGS:JPKZTcan_02947_1s_mrna	hypothetical protein Tcan_02947, partial [Toxocara canis]	0.218845	0.302069	0	0.732555	1.10913	1.07585	0.00904161	0.47654	0.178546	-2.48563	down
Tcan_04862	gnlWGS:JPKZTcan_04862_1s_mrna	putative phospholipid-transporting ATPase VD [Toxocara canis]	10.8827	9.49215	7.69802	8.77981	9.2448	7.0495	0.00909205	0.476959	1.1196	0.16298	up
Tcan_10510	gnlWGS:JPKZTcan_10510_1s_mrna	Rhotekin, partial [Toxocara canis]	14.8108	12.3438	11.8498	10.0936	12.5891	9.18816	0.00910459	0.476959	1.22383	0.291399	up
Tcan_15852	gnlWGS:JPKZTcan_15852_1s_mrna	unnamed protein product [Toxocara canis]	7.07968	4.73141	3.74208	8.23111	10.0664	7.22673	0.00933322	0.486	0.60935	-0.714657	down
Tcan_13246	gnlWGS:JPKZTcan_13246_1s_mrna	Nuclear factor 1 C-type [Toxocara canis]	14.0612	12.8326	11.7661	11.9052	11.329	9.05149	0.00932133	0.486	1.19743	0.259945	up
Tcan_02559	gnlWGS:JPKZTcan_02559_1s_mrna	5'-3' exoribonuclease 1 [Toxocara canis]	6.83868	5.20619	4.33323	3.92705	3.77615	3.9245	0.00938922	0.487453	1.40854	0.494203	up
Tcan_04718	gnlWGS:JPKZTcan_04718_1s_mrna	hypothetical protein Tcan_04718 [Toxocara canis]	535.551	492.886	351.817	624.775	621.455	514.875	0.00946445	0.488936	0.783743	-0.351547	down
Tcan_18892	gnlWGS:JPKZTcan_18892_1s_mrna	Aspartyl protease inhibitor [Toxocara canis]	142.879	113.296	74.1216	96.777	92.4927	64.4703	0.00947419	0.488936	1.30171	0.38041	up
Tcan_02409	gnlWGS:JPKZTcan_02409_1s_mrna	hypothetical protein Tcan_02409 [Toxocara canis]	7.04565	7.91992	4.8299	5.19743	4.0845	2.65532	0.00957178	0.492506	1.65829	0.7297	up
Tcan_02846	gnlWGS:JPKZTcan_02846_1s_mrna	Thioredoxin reductase 1 [Toxocara canis]	39.6431	39.3513	33.1429	30.5383	33.1546	29.6178	0.00960093	0.492545	1.20176	0.265152	up
Tcan_16521	gnlWGS:JPKZTcan_16521_1s_mrna	hypothetical protein Tcan_16521 [Toxocara canis]	42.7255	41.6328	35.5865	54.7846	58.5297	47.0683	0.00970567	0.496449	0.747866	-0.419147	down
Tcan_02536	gnlWGS:JPKZTcan_02536_1s_mrna	Vacuolar protein sorting-associated protein 11 -like protein [Toxocara canis]	6.01274	4.41132	4.04262	7.91815	8.07656	6.11029	0.00992963	0.500523	0.654453	-0.611638	down
Tcan_14592	gnlWGS:JPKZTcan_14592_1s_mrna	GPI ethanolamine phosphate transferase 1 [Toxocara canis]	14.2985	12.7199	10.3932	11.5737	12.7523	9.46592	0.00991803	0.500523	1.10712	0.146807	up
Tcan_08510	gnlWGS:JPKZTcan_08510_1s_mrna	HEAT repeat-containing protein 5B [Toxocara canis]	15.0075	13.96	12.0047	12.5701	13.585	10.4996	0.00982422	0.500523	1.11779	0.160648	up
Tcan_15964	gnlWGS:JPKZTcan_15964_1s_mrna	AP2-associated protein kinase 1 [Toxocara canis]	13.2256	8.87412	8.48424	8.58976	9.06121	6.76576	0.00989728	0.500523	1.25258	0.324903	up
Tcan_03119	gnlWGS:JPKZTcan_03119_1s_mrna	E3 ubiquitin-protein ligase ubr-1 [Toxocara canis]	5.03949	4.50079	3.7544	2.04234	3.37367	2.82578	0.00992711	0.500523	1.61308	0.68982	up
Tcan_10015	gnlWGS:JPKZTcan_10015_1s_mrna	hypothetical protein Tcan_10015 [Toxocara canis]	0.861882	0.40199	0.463054	1.61119	1.22715	1.08073	0.0100433	0.504557	0.440647	-1.1823	down
Tcan_12872	gnlWGS:JPKZTcan_12872_1s_mrna	Chromatin assembly factor 1 subunit B [Toxocara canis]	1.18185	1.66541	1.12308	0.76703	0.97942	0.693475	0.0100679	0.504557	1.62724	0.702425	up
Tcan_10538	gnlWGS:JPKZTcan_10538_1s_mrna	Metabotropic glutamate receptor 7 [Toxocara canis]	55.1537	52.8573	47.5952	38.9045	41.8698	41.5493	0.0101274	0.504623	1.27209	0.347196	up
Tcan_00321	gnlWGS:JPKZTcan_00321_1s_mrna	hypothetical protein Tcan_00321, partial [Toxocara canis]	5.68625	6.99369	5.2856	3.53667	4.91825	2.58277	0.0101256	0.504623	1.62765	0.702793	up
Tcan_17984	gnlWGS:JPKZTcan_17984_1s_mrna	Prion-like-(Q/N-rich) domain-bearing protein 96 [Toxocara canis]	23.6265	25.1929	21.8572	19.6265	19.9588	17.611	0.0101826	0.505921	1.23569	0.305312	up
Tcan_15375	gnlWGS:JPKZTcan_15375_1s_mrna	Ubiquitin-like modifier-activating enzyme 1 [Toxocara canis]	25.403	23.8952	18.7355	21.8397	22.8079	17.6306	0.0103333	0.51194	1.09241	0.12752	up
Tcan_15854	gnlWGS:JPKZTcan_15854_1s_mrna	hypothetical protein Tcan_15854, partial [Toxocara canis]	28.8723	24.2976	17.034	34.354	33.0535	28.7087	0.0105248	0.519944	0.730407	-0.453228	down
Tcan_07297	gnlWGS:JPKZTcan_07297_1s_mrna	Putative cuticle collagen [Toxocara canis]	0	0	0	0.132708	0.072184	0.171165	0.0107783	0.524692	0.000797751	-10.2918	down
Tcan_16942	gnlWGS:JPKZTcan_16942_1s_mrna	Breast carcinoma-amplified sequence 3 [Toxocara canis]	9.74492	9.61556	8.44757	8.66326	8.30813	6.59322	0.0107038	0.524692	1.18008	0.238881	up
Tcan_09257	gnlWGS:JPKZTcan_09257_1s_mrna	Histone-lysine N-methyltransferase 2C [Toxocara canis]	9.28202	6.31024	5.58716	5.37965	6.73332	4.30328	0.0106971	0.524692	1.29015	0.367539	up
Tcan_02430	gnlWGS:JPKZTcan_02430_1s_mrna	Insulin-like receptor [Toxocara canis]	16.0567	15.7307	12.1437	10.8806	11.6067	10.8763	0.010773	0.524692	1.31673	0.396965	up
Tcan_02899	gnlWGS:JPKZTcan_02899_1s_mrna	MAP kinase-interacting serine/threonine-protein kinase 1 [Toxocara canis]	115.508	112.077	118.042	84.3055	85.3352	88.0801	0.0107959	0.524692	1.34109	0.423408	up
Tcan_13115	gnlWGS:JPKZTcan_13115_1s_mrna	hypothetical protein Tcan_13115 [Toxocara canis]	16.6148	12.8088	10.3549	7.34776	12.0606	7.53687	0.0108025	0.524692	1.47627	0.561957	up
Tcan_02228	gnlWGS:JPKZTcan_02228_1s_mrna	Alanine--tRNA ligase, cytoplasmic [Toxocara canis]	36.1547	36.2534	39.4824	25.0059	28.1381	27.3729	0.0108923	0.527575	1.38965	0.474724	up
Tcan_12950	gnlWGS:JPKZTcan_12950_1s_mrna	26S proteasome non-ATPase regulatory subunit 1 [Toxocara canis]	82.5901	77.2889	57.6391	98.4007	96.6658	85.513	0.0109242	0.527647	0.775246	-0.367274	down
Tcan_09233	gnlWGS:JPKZTcan_09233_1s_mrna	OV-17 antigen [Toxocara canis]	933.421	809.619	593.452	1052.87	1056.74	841.163	0.0109804	0.528892	0.791824	-0.336747	down
Tcan_03184	gnlWGS:JPKZTcan_03184_1s_mrna	hypothetical protein Tcan_03184 [Toxocara canis]	45.9393	35.5764	29.1107	52.4957	58.1774	39.245	0.011147	0.532951	0.737912	-0.43848	down
Tcan_04852	gnlWGS:JPKZTcan_04852_1s_mrna	Uncharacterized protein F44E2.4 [Toxocara canis]	4.22591	4.64521	3.47964	3.28765	3.32517	3.16858	0.0111569	0.532951	1.26268	0.336488	up
Tcan_08811	gnlWGS:JPKZTcan_08811_1s_mrna	Endoprotease bli-4 [Toxocara canis]	13.341	10.0232	10.8301	7.83055	9.37997	8.58075	0.0111186	0.532951	1.32581	0.406871	up
Tcan_16320	gnlWGS:JPKZTcan_16320_1s_mrna	hypothetical protein Tcan_16320 [Toxocara canis]	206.278	187.395	147.165	236.273	243.659	206.521	0.0112204	0.534508	0.787873	-0.343964	down
Tcan_08158	gnlWGS:JPKZTcan_08158_1s_mrna	Serpentine receptor class alpha/beta-14 [Toxocara canis]	3.98545	2.65685	2.38194	5.13611	4.79312	4.03843	0.0112704	0.535421	0.64608	-0.630214	down
Tcan_05414	gnlWGS:JPKZTcan_05414_1s_mrna	USP6 N-terminal-like protein [Toxocara canis]	7.50158	5.50315	4.59011	4.9665	5.44473	3.42247	0.0113811	0.539204	1.27188	0.346965	up
Tcan_18064	gnlWGS:JPKZTcan_18064_1s_mrna	hypothetical protein Tcan_18064, partial [Toxocara canis]	8.25555	8.3329	5.20301	12.0675	14.3056	7.65424	0.011447	0.540846	0.64041	-0.642932	down
Tcan_18989	gnlWGS:JPKZTcan_18989_1s_mrna	Ski oncogene [Toxocara canis]	25.5057	22.035	16.2981	18.3828	19.5277	16.139	0.0114928	0.541534	1.18112	0.240154	up
Tcan_07769	gnlWGS:JPKZTcan_07769_1s_mrna	Guanylate cyclase receptor-type gcy-1 [Toxocara canis]	24.9376	19.8048	15.7608	32.3914	39.2108	20.3842	0.0118395	0.556363	0.657741	-0.604409	down
Tcan_13065	gnlWGS:JPKZTcan_13065_1s_mrna	MMACHC-like protein [Toxocara canis]	6.29685	6.04721	3.86049	7.7884	8.69513	7.33506	0.0120763	0.559138	0.680332	-0.555688	down
Tcan_09952	gnlWGS:JPKZTcan_09952_1s_mrna	hypothetical protein Tcan_09952 [Toxocara canis]	133.235	96.9812	64.4589	157.375	160.23	111.266	0.0119533	0.559138	0.687094	-0.54142	down
Tcan_15334	gnlWGS:JPKZTcan_15334_1s_mrna	hypothetical protein Tcan_15334, partial [Toxocara canis]	83.6475	76.5061	67.0174	103.398	103.354	91.9493	0.0121566	0.559138	0.760529	-0.394925	down
Tcan_03418	gnlWGS:JPKZTcan_03418_1s_mrna	Zinc transporter ZIP3 [Toxocara canis]	18.7294	17.0708	12.3638	21.8946	22.4003	18.6955	0.0121418	0.559138	0.764624	-0.387178	down
Tcan_10409	gnlWGS:JPKZTcan_10409_1s_mrna	Piezo-type mechanosensitive ion channel component 2 [Toxocara canis]	6.41712	5.40108	4.20619	4.62457	5.12391	3.92341	0.0120838	0.559138	1.17207	0.229056	up
Tcan_08655	gnlWGS:JPKZTcan_08655_1s_mrna	putative 3',5'-cyclic phosphodiesterase pde-3 [Toxocara canis]	16.648	14.1352	12.2798	13.5188	12.6433	9.99255	0.012107	0.559138	1.19108	0.25227	up
Tcan_14036	gnlWGS:JPKZTcan_14036_1s_mrna	Complement C3 [Toxocara canis]	9.9996	8.94143	8.58458	8.47021	6.62138	5.78599	0.0119753	0.559138	1.31843	0.39882	up
Tcan_02319	gnlWGS:JPKZTcan_02319_1s_mrna	Eukaryotic translation initiation factor 3 subunit A [Toxocara canis]	30.2475	28.351	20.6581	20.5829	18.7081	20.375	0.0121349	0.559138	1.32834	0.409621	up
Tcan_17647	gnlWGS:JPKZTcan_17647_1s_mrna	Actin-binding LIM protein 1 [Toxocara canis]	32.7394	30.2433	28.2125	26.713	24.9134	22.0811	0.0122628	0.562533	1.23726	0.307146	up
Tcan_04288	gnlWGS:JPKZTcan_04288_1s_mrna	unnamed protein product [Toxocara canis]	6.7713	5.34721	3.67846	9.45892	9.41599	7.47707	0.0123464	0.563386	0.59946	-0.738264	down
Tcan_18316	gnlWGS:JPKZTcan_18316_1s_mrna	Nose resistant to fluoxetine protein 6 [Toxocara canis]	15.4157	15.4016	11.8516	18.9812	20.1669	15.977	0.0123362	0.563386	0.774036	-0.369527	down
Tcan_13993	gnlWGS:JPKZTcan_13993_1s_mrna	hypothetical protein Tcan_13993 [Toxocara canis]	0	0	0	1.39439	1.08587	0	0.0124016	0.564419	0.000120955	-13.0132	down
Tcan_18974	gnlWGS:JPKZTcan_18974_1s_mrna	Uncharacterized protein Tcan_18974 [Toxocara canis]	14.1905	13.2764	13.3659	11.2266	10.6853	10.3206	0.0124483	0.565059	1.26682	0.341214	up
Tcan_09225	gnlWGS:JPKZTcan_09225_1s_mrna	Uncharacterized protein F52H3.2 [Toxocara canis]	9.27985	6.71553	5.32631	5.58019	6.71802	4.49587	0.0125407	0.567767	1.2696	0.344369	up
Tcan_17337	gnlWGS:JPKZTcan_17337_1s_mrna	Transmembrane protein [Toxocara canis]	2.32827	2.36098	0.983077	3.44248	4.45624	3.03333	0.0126627	0.569152	0.518871	-0.946553	down
Tcan_14427	gnlWGS:JPKZTcan_14427_1s_mrna	5'-nucleotidase domain-containing protein 2 [Toxocara canis]	8.85654	7.16145	5.10984	6.42304	5.82682	4.39984	0.0126697	0.569152	1.26896	0.343649	up
Tcan_18227	gnlWGS:JPKZTcan_18227_1s_mrna	hypothetical protein Tcan_18227 [Toxocara canis]	0.215633	0.460425	0.812106	0.090796	0.073299	0	0.0126431	0.569152	9.06892	3.18093	up
Tcan_02819	gnlWGS:JPKZTcan_02819_1s_mrna	hypothetical protein Tcan_02819 [Toxocara canis]	109.867	96.0168	60.0742	80.5142	77.0368	54.5456	0.0127855	0.572871	1.25395	0.326475	up
Tcan_00417	gnlWGS:JPKZTcan_00417_1s_mrna	hypothetical protein Tcan_00417, partial [Toxocara canis]	18.8235	15.5088	10.791	23.3359	21.8971	18.6385	0.0128259	0.5732	0.706469	-0.501301	down
Tcan_09815	gnlWGS:JPKZTcan_09815_1s_mrna	putative anion transporter 2, chloroplastic [Toxocara canis]	6.42938	6.62454	5.65149	4.61722	4.23048	4.77095	0.0129927	0.579161	1.37351	0.457872	up
Tcan_08764	gnlWGS:JPKZTcan_08764_1s_mrna	Dual specificity protein phosphatase 14 [Toxocara canis]	45.6265	36.5367	29.271	51.3037	52.213	41.2726	0.0130317	0.579411	0.76963	-0.377763	down
Tcan_07501	gnlWGS:JPKZTcan_07501_1s_mrna	Prolyl carboxy peptidase like protein 5, partial [Toxocara canis]	18.2057	15.4562	12.2681	21.7824	20.4882	17.206	0.0131496	0.58167	0.772234	-0.372889	down
Tcan_01035	gnlWGS:JPKZTcan_01035_1s_mrna	hypothetical protein Tcan_01035, partial [Toxocara canis]	1.23085	2.04833	1.78095	0.717675	0.70316	0.581445	0.0131412	0.58167	2.52718	1.33753	up
Tcan_09582	gnlWGS:JPKZTcan_09582_1s_mrna	TWiK family of potassium channels protein 7 [Toxocara canis]	2.82474	2.10901	1.4941	3.42865	4.84471	2.45915	0.0132588	0.585006	0.598915	-0.739578	down
Tcan_15649	gnlWGS:JPKZTcan_15649_1s_mrna	Protein Smaug -like protein 1 [Toxocara canis]	13.4409	11.555	10.3485	9.72897	10.7741	9.31687	0.0134842	0.592091	1.18526	0.245207	up
Tcan_05744	gnlWGS:JPKZTcan_05744_1s_mrna	Peptidase inhibitor 16 [Toxocara canis]	1.46608	1.40648	1.41064	0.936509	0.956198	0.800367	0.0134876	0.592091	1.59045	0.669434	up
Tcan_09843	gnlWGS:JPKZTcan_09843_1s_mrna	D-2-hydroxyglutarate dehydrogenase, mitochondrial [Toxocara canis]	13.556	11.2363	7.87316	17.261	16.6114	11.6625	0.0135715	0.594266	0.717375	-0.479202	down
Tcan_09479	gnlWGS:JPKZTcan_09479_1s_mrna	Cat eye syndrome critical region protein 5 [Toxocara canis]	19.981	17.8026	13.8283	22.6332	24.1174	21.6658	0.0138479	0.603462	0.75438	-0.406637	down
Tcan_08145	gnlWGS:JPKZTcan_08145_1s_mrna	Cell death-related nuclease 6 [Toxocara canis]	12.9722	10.3891	7.40508	9.51418	7.91996	6.24037	0.0138511	0.603462	1.29955	0.378018	up
Tcan_05397	gnlWGS:JPKZTcan_05397_1s_mrna	Putative ferric-chelate reductase 1 [Toxocara canis]	13.5387	13.122	11.9766	10.5674	12.2669	9.30148	0.0139197	0.604165	1.20231	0.265812	up
Tcan_12672	gnlWGS:JPKZTcan_12672_1s_mrna	Ras-related protein Rab-33 [Toxocara canis]	14.2466	15.4847	9.76817	10.4378	12.1254	9.05983	0.0139369	0.604165	1.24907	0.320853	up
Tcan_17506	gnlWGS:JPKZTcan_17506_1s_mrna	hypothetical protein Tcan_17506 [Toxocara canis]	11.497	12.1745	10.3588	8.0907	4.70629	6.97476	0.0140969	0.609576	1.72116	0.78338	up
Tcan_17113	gnlWGS:JPKZTcan_17113_1s_mrna	hypothetical protein Tcan_17113 [Toxocara canis]	21.753	20.9842	14.3351	17.4844	17.484	11.8068	0.0142088	0.612887	1.22014	0.287048	up
Tcan_09600	gnlWGS:JPKZTcan_09600_1s_mrna	C-X-C chemokine receptor type 1 [Toxocara canis]	5.58219	5.52978	3.38623	10.3551	8.3204	7.22681	0.0143108	0.613501	0.559726	-0.837207	down
Tcan_07246	gnlWGS:JPKZTcan_07246_1s_mrna	UPF0046 protein C25E10.12 [Toxocara canis]	10.5923	9.34366	8.22649	13.8828	13.5821	11.0232	0.0143646	0.613501	0.731718	-0.45064	down
Tcan_18140	gnlWGS:JPKZTcan_18140_1s_mrna	DNA-directed RNA polymerase II subunit RPB1 [Toxocara canis]	21.1887	18.3048	14.3565	17.0357	16.7458	14.4141	0.0143478	0.613501	1.11732	0.160046	up
Tcan_16518	gnlWGS:JPKZTcan_16518_1s_mrna	Ankyrin repeat domain-containing protein, chloroplastic, partial [Toxocara canis]	4.64794	3.17669	3.02183	3.11127	3.29781	2.1081	0.0143444	0.613501	1.27348	0.348776	up
Tcan_08075	gnlWGS:JPKZTcan_08075_1s_mrna	Warthog protein 6 [Toxocara canis]	0.319837	0.172251	0.179115	0.775754	0.518122	0.386007	0.0144745	0.615167	0.399553	-1.32354	down
Tcan_03674	gnlWGS:JPKZTcan_03674_1s_mrna	Anaphase-promoting complex subunit 1, partial [Toxocara canis]	6.15706	5.2339	4.39228	4.99217	5.13336	3.91701	0.0144483	0.615167	1.12396	0.16859	up
Tcan_10491	gnlWGS:JPKZTcan_10491_1s_mrna	Copper-transporting ATPase 1 [Toxocara canis]	41.332	37.905	27.0308	33.7311	35.1191	23.9977	0.0145179	0.615502	1.14454	0.194765	up
Tcan_14772	gnlWGS:JPKZTcan_14772_1s_mrna	hypothetical protein Tcan_14772 [Toxocara canis]	0	0	0	0.600278	0.641908	0.096828	0.0146496	0.619572	0.000224045	-12.1239	down
Tcan_12663	gnlWGS:JPKZTcan_12663_1s_mrna	Tryptophan 5-hydroxylase 1 [Toxocara canis]	0.906676	0.817072	0.634736	1.64399	1.35746	0.903862	0.0148106	0.624854	0.603917	-0.727578	down
Tcan_08979	gnlWGS:JPKZTcan_08979_1s_mrna	ETS homologous factor [Toxocara canis]	17.4676	18.0531	12.6177	14.4233	15.4721	12.0728	0.0148904	0.626697	1.14702	0.197888	up
Tcan_14099	gnlWGS:JPKZTcan_14099_1s_mrna	MAP kinase-activating death domain protein [Toxocara canis]	22.2446	17.5718	15.6069	16.6558	17.8481	14.4226	0.014983	0.628902	1.13279	0.179879	up
Tcan_11911	gnlWGS:JPKZTcan_11911_1s_mrna	Chitin synthase 2 [Toxocara canis]	0.178669	0.062894	0.149877	0	0.044174	0	0.0150153	0.628902	8.86132	3.14752	up
Tcan_07674	gnlWGS:JPKZTcan_07674_1s_mrna	hypothetical protein Tcan_07674 [Toxocara canis]	1.57925	1.13582	0.969426	1.79802	3.06315	2.1787	0.0151872	0.629717	0.523376	-0.93408	down
Tcan_02835	gnlWGS:JPKZTcan_02835_1s_mrna	Patched-related protein 9 [Toxocara canis]	2.37529	1.68329	0.912826	3.51765	3.52713	1.85864	0.0150719	0.629717	0.55837	-0.840707	down
Tcan_00644	gnlWGS:JPKZTcan_00644_1s_mrna	hypothetical protein Tcan_00644, partial [Toxocara canis]	38.1936	30.6706	20.1882	47.8953	45.5176	32.7433	0.0152527	0.629717	0.70589	-0.502484	down
Tcan_15396	gnlWGS:JPKZTcan_15396_1s_mrna	E3 ubiquitin-protein ligase HUWE1 [Toxocara canis]	30.2833	26.3288	24.7009	39.054	37.5311	33.4809	0.0152373	0.629717	0.738765	-0.436812	down
Tcan_18764	gnlWGS:JPKZTcan_18764_1s_mrna	hypothetical protein Tcan_18764 [Toxocara canis]	13.3826	11.9305	5.74631	7.56456	5.03142	4.99532	0.0151199	0.629717	1.76561	0.820167	up
Tcan_08503	gnlWGS:JPKZTcan_08503_1s_mrna	hypothetical protein Tcan_08503 [Toxocara canis]	7.41581	2.83326	4.30545	1.7321	0	0.853445	0.0151956	0.629717	5.6292	2.49293	up
Tcan_16204	gnlWGS:JPKZTcan_16204_1s_mrna	hypothetical protein Tcan_16204 [Toxocara canis]	0.38788	0.543673	0.400475	0	0	0	0.0153388	0.631769	4440.09	12.1164	up
Tcan_17300	gnlWGS:JPKZTcan_17300_1s_mrna	Cullin-1 [Toxocara canis]	18.1265	18.2348	13.089	15.4305	15.521	12.6929	0.0154493	0.631817	1.13303	0.180182	up
Tcan_16158	gnlWGS:JPKZTcan_16158_1s_mrna	Major facilitator superfamily domain-containing protein 8 [Toxocara canis]	25.1668	22.9957	21.7195	18.6772	19.6599	18.538	0.0153952	0.631817	1.22869	0.297126	up
Tcan_09958	gnlWGS:JPKZTcan_09958_1s_mrna	Brefeldin A-inhibited guanine nucleotide-exchange protein 1 [Toxocara canis]	4.24818	3.20791	2.9375	2.5107	2.79976	1.65956	0.0154137	0.631817	1.49119	0.576461	up
Tcan_05798	gnlWGS:JPKZTcan_05798_1s_mrna	Baculoviral IAP repeat-containing protein 6 [Toxocara canis]	7.94267	5.44377	6.03823	3.41424	5.65498	4.27593	0.0155546	0.634627	1.45556	0.541574	up
Tcan_10484	gnlWGS:JPKZTcan_10484_1s_mrna	hypothetical protein Tcan_10484 [Toxocara canis]	4.00515	3.12497	3.61285	2.03572	1.09014	2.35008	0.0156323	0.636301	1.96185	0.972214	up
Tcan_18630	gnlWGS:JPKZTcan_18630_1s_mrna	Major facilitator superfamily domain-containing protein 8 [Toxocara canis]	0.543259	0.517733	0.286142	0.676855	1.17496	0.805907	0.0159556	0.638394	0.506876	-0.980295	down
Tcan_08649	gnlWGS:JPKZTcan_08649_1s_mrna	Alkylglycerol monooxygenase -like protein [Toxocara canis]	2.89696	3.30961	1.97348	5.90587	4.31473	4.35733	0.015908	0.638394	0.561126	-0.833603	down
Tcan_12680	gnlWGS:JPKZTcan_12680_1s_mrna	Protein disabled [Toxocara canis]	25.9471	22.4625	18.8075	21.6	21.974	17.2743	0.0159783	0.638394	1.10466	0.143609	up
Tcan_12436	gnlWGS:JPKZTcan_12436_1s_mrna	Protein CLASP-1 [Toxocara canis]	24.6885	18.4339	18.5769	15.6356	18.3618	15.3501	0.0158628	0.638394	1.2503	0.322275	up
Tcan_16985	gnlWGS:JPKZTcan_16985_1s_mrna	hypothetical protein Tcan_16985 [Toxocara canis]	14.6926	19.0902	15.7175	12.3947	13.8614	10.9622	0.0158779	0.638394	1.33	0.411427	up
Tcan_03716	gnlWGS:JPKZTcan_03716_1s_mrna	hypothetical protein Tcan_03716 [Toxocara canis]	30.1594	25.3354	28.0573	17.7268	19.7918	21.8096	0.0159766	0.638394	1.4083	0.493956	up
Tcan_14612	gnlWGS:JPKZTcan_14612_1s_mrna	Cadherin-related hmr-1 [Toxocara canis]	6.8521	5.49115	5.20693	4.56892	5.20929	2.41561	0.0158711	0.638394	1.43927	0.525335	up
Tcan_00034	gnlWGS:JPKZTcan_00034_1s_mrna	hypothetical protein Tcan_00034, partial [Toxocara canis]	2.41097	2.64357	2.17809	1.74744	1.5489	0.799246	0.0157728	0.638394	1.76596	0.820453	up
Tcan_16726	gnlWGS:JPKZTcan_16726_1s_mrna	Ecotropic viral integration site 5 -like protein [Toxocara canis]	26.6455	24.0366	15.741	20.0367	20.136	15.2638	0.0160877	0.641288	1.19818	0.260849	up
Tcan_11078	gnlWGS:JPKZTcan_11078_1s_mrna	Tyrosine-protein phosphatase 1 [Toxocara canis]	65.5474	58.781	38.8082	72.6348	80.9817	60.7124	0.0162084	0.643251	0.761151	-0.393746	down
Tcan_16363	gnlWGS:JPKZTcan_16363_1s_mrna	hypothetical protein Tcan_16363 [Toxocara canis]	19.0835	19.9237	14.8353	17.2982	16.7618	12.4152	0.0162111	0.643251	1.15852	0.212283	up
Tcan_17399	gnlWGS:JPKZTcan_17399_1s_mrna	Neuronal PAS domain-containing protein 1 [Toxocara canis]	3.23417	4.54487	3.00188	2.94075	1.91039	1.72186	0.0162673	0.644008	1.64018	0.713856	up
Tcan_02025	gnlWGS:JPKZTcan_02025_1s_mrna	hypothetical protein Tcan_02025 [Toxocara canis]	8.82964	8.02724	6.94269	6.73725	7.16484	5.56564	0.0163579	0.645241	1.22251	0.28985	up
Tcan_12263	gnlWGS:JPKZTcan_12263_1s_mrna	hypothetical protein Tcan_12263 [Toxocara canis]	1.3509	1.31519	0	0	0	0	0.0163729	0.645241	8886.98	13.1175	up
Tcan_07729	gnlWGS:JPKZTcan_07729_1s_mrna	Rhomboid-related protein 2 [Toxocara canis]	2.60207	1.9349	1.55445	3.1768	4.72676	2.46591	0.0164137	0.645383	0.587439	-0.76749	down
Tcan_13187	gnlWGS:JPKZTcan_13187_1s_mrna	Extracellular superoxide dismutase [Cu-Zn] [Toxocara canis]	60.0531	52.6214	47.3973	68.1719	81.087	65.2897	0.0165895	0.650818	0.746087	-0.422585	down
Tcan_02760	gnlWGS:JPKZTcan_02760_1s_mrna	Integrator complex subunit 8 [Toxocara canis]	6.64616	5.88072	2.83414	11.6128	8.87838	7.1149	0.016753	0.651838	0.556435	-0.845715	down
Tcan_11110	gnlWGS:JPKZTcan_11110_1s_mrna	hypothetical protein Tcan_11110 [Toxocara canis]	3.57124	2.56258	1.89259	4.19177	4.79163	3.54335	0.0168034	0.651838	0.640742	-0.642184	down
Tcan_05238	gnlWGS:JPKZTcan_05238_1s_mrna	D-amino-acid oxidase 2 [Toxocara canis]	7.01883	5.14068	4.79314	9.83164	9.19202	6.1598	0.0167404	0.651838	0.673166	-0.570966	down
Tcan_17086	gnlWGS:JPKZTcan_17086_1s_mrna	hypothetical protein Tcan_17086 [Toxocara canis]	6.85317	5.53231	4.64905	7.86915	8.54987	6.41836	0.0167956	0.651838	0.745905	-0.422936	down
Tcan_05447	gnlWGS:JPKZTcan_05447_1s_mrna	Annexin A7 [Toxocara canis]	28.5799	27.7546	18.4505	22.2482	21.8229	18.8906	0.0166921	0.651838	1.18779	0.248275	up
Tcan_10254	gnlWGS:JPKZTcan_10254_1s_mrna	hypothetical protein Tcan_10254 [Toxocara canis]	52.3582	53.491	37.7842	37.0114	41.5175	38.4627	0.0169767	0.655627	1.22772	0.295986	up
Tcan_09548	gnlWGS:JPKZTcan_09548_1s_mrna	hypothetical protein Tcan_09548 [Toxocara canis]	44.1868	40.7151	29.9414	28.1324	30.2121	31.3212	0.0169548	0.655627	1.28079	0.357038	up
Tcan_00307	gnlWGS:JPKZTcan_00307_1s_mrna	hypothetical protein Tcan_00307, partial [Toxocara canis]	15.3028	7.5751	3.83521	19.5486	25.5026	11.1079	0.0170883	0.658468	0.475668	-1.07197	down
Tcan_03650	gnlWGS:JPKZTcan_03650_1s_mrna	hypothetical protein Tcan_03650 [Toxocara canis]	0	0	0	2.94434	0	1.40315	0.0172043	0.660006	6.90053e-05	-13.8229	down
Tcan_14392	gnlWGS:JPKZTcan_14392_1s_mrna	Serpentine receptor class alpha/beta-14 [Toxocara canis]	1.50171	1.38156	0.518717	2.15322	2.82613	1.69704	0.0171924	0.660006	0.509555	-0.972691	down
Tcan_18988	gnlWGS:JPKZTcan_18988_1s_mrna	hypothetical protein Tcan_18988 [Toxocara canis]	32.1522	31.8211	25.8572	28.6431	26.2489	22.2421	0.0172911	0.660412	1.1646	0.219834	up
Tcan_07642	gnlWGS:JPKZTcan_07642_1s_mrna	Ankyrin repeat domain-containing protein 17 [Toxocara canis]	9.57	8.73898	8.84522	7.599	7.07518	7.04379	0.0172621	0.660412	1.25031	0.322286	up
Tcan_00015	gnlWGS:JPKZTcan_00015_1s_mrna	Polyprotein ABA-1, partial [Toxocara canis]	32.7464	18.675	7.72558	55.8982	60.1754	18.538	0.0173653	0.66057	0.43939	-1.18642	down
Tcan_11284	gnlWGS:JPKZTcan_11284_1s_mrna	Maestro heat-like repeat-containing protein family member 1 [Toxocara canis]	7.42384	6.92485	5.49787	5.73491	6.099	5.40245	0.0174476	0.66057	1.15144	0.203434	up
Tcan_05853	gnlWGS:JPKZTcan_05853_1s_mrna	hypothetical protein Tcan_05853 [Toxocara canis]	17.3931	12.8743	9.16158	10.8184	12.2818	7.88069	0.0174176	0.66057	1.27269	0.347878	up
Tcan_05412	gnlWGS:JPKZTcan_05412_1s_mrna	Solute carrier family 35 member E1 -like protein [Toxocara canis]	27.6785	28.3471	33.5685	22.1609	23.0826	20.8328	0.0173753	0.66057	1.35592	0.439271	up
Tcan_16420	gnlWGS:JPKZTcan_16420_1s_mrna	hypothetical protein Tcan_16420 [Toxocara canis]	102.332	85.2259	81.6108	79.7291	79.2883	70.1252	0.0176608	0.661492	1.17468	0.232266	up
Tcan_07945	gnlWGS:JPKZTcan_07945_1s_mrna	Eukaryotic translation initiation factor 2-alpha kinase [Toxocara canis]	54.9995	44.3515	44.7191	43.8846	46.4386	31.8629	0.0175917	0.661492	1.1791	0.237691	up
Tcan_18954	gnlWGS:JPKZTcan_18954_1s_mrna	hypothetical protein Tcan_18954 [Toxocara canis]	62.9058	58.0523	44.0796	47.8436	56.3377	34.9846	0.0176627	0.661492	1.18591	0.245989	up
Tcan_12977	gnlWGS:JPKZTcan_12977_1s_mrna	Tyrosine-protein phosphatase 10D [Toxocara canis]	2.29247	1.88788	1.72127	1.74299	1.76984	1.30969	0.0175104	0.661492	1.22376	0.291323	up
Tcan_00035	gnlWGS:JPKZTcan_00035_1s_mrna	hypothetical protein Tcan_00035, partial [Toxocara canis]	10.2678	10.2051	8.26533	5.5297	8.12216	6.36812	0.0176244	0.661492	1.43548	0.521534	up
Tcan_07237	gnlWGS:JPKZTcan_07237_1s_mrna	hypothetical protein Tcan_07237 [Toxocara canis]	4.75791	4.44361	2.97071	6.8913	8.63541	4.44696	0.0178355	0.663481	0.609414	-0.714505	down
Tcan_13300	gnlWGS:JPKZTcan_13300_1s_mrna	TBC1 domain family member 13 [Toxocara canis]	4.97655	3.85499	3.67665	6.65092	6.12941	4.98218	0.0179336	0.663481	0.70419	-0.505962	down
Tcan_08724	gnlWGS:JPKZTcan_08724_1s_mrna	putative E3 ubiquitin-protein ligase ARI1 [Toxocara canis]	6.08048	4.581	3.30134	6.655	8.0765	5.07938	0.0179634	0.663481	0.704805	-0.504703	down
Tcan_16467	gnlWGS:JPKZTcan_16467_1s_mrna	Phosphoserine aminotransferase [Toxocara canis]	32.351	24.75	21.616	37.3682	40.0944	28.6243	0.0178795	0.663481	0.742005	-0.430499	down
Tcan_11312	gnlWGS:JPKZTcan_11312_1s_mrna	hypothetical protein Tcan_11312 [Toxocara canis]	85.5206	79.6833	59.5435	71.1265	76.198	52.8526	0.0179836	0.663481	1.12274	0.167028	up
Tcan_08920	gnlWGS:JPKZTcan_08920_1s_mrna	Glutamate synthase 2 [NADH], chloroplastic [Toxocara canis]	9.38733	8.19717	6.13562	6.73488	6.85688	5.44566	0.0179284	0.663481	1.24597	0.317274	up
Tcan_03924	gnlWGS:JPKZTcan_03924_1s_mrna	Tumor suppressor p53-binding protein 1, partial [Toxocara canis]	0.140431	0.083632	0.144847	0	0.045087	0	0.0178499	0.663481	8.18218	3.03249	up
Tcan_13883	gnlWGS:JPKZTcan_13883_1s_mrna	Uncharacterized protein C30C11.4 [Toxocara canis]	63.3448	55.3235	49.0193	50.1963	50.1792	45.5684	0.0181419	0.667898	1.14899	0.200362	up
Tcan_17896	gnlWGS:JPKZTcan_17896_1s_mrna	BSD domain-containing protein 1 [Toxocara canis]	57.2613	55.2319	39.7075	45.7681	51.0976	38.8045	0.0182304	0.668363	1.12184	0.165871	up
Tcan_08585	gnlWGS:JPKZTcan_08585_1s_mrna	Mediator of RNA polymerase II transcription subunit 14 [Toxocara canis]	5.5608	4.89449	4.65068	3.83967	4.85865	3.57424	0.0182316	0.668363	1.23087	0.299683	up
Tcan_13499	gnlWGS:JPKZTcan_13499_1s_mrna	hypothetical protein Tcan_13498 [Toxocara canis]	4.26629	3.47556	1.5352	7.03558	7.52593	3.85741	0.01846	0.670658	0.503669	-0.989452	down
Tcan_17309	gnlWGS:JPKZTcan_17309_1s_mrna	hypothetical protein Tcan_17309, partial [Toxocara canis]	1.87821	1.32779	0.808672	2.25379	2.40565	1.97178	0.0184526	0.670658	0.605418	-0.723996	down
Tcan_12324	gnlWGS:JPKZTcan_12324_1s_mrna	DNA-directed RNA polymerase III subunit RPC2 [Toxocara canis]	10.3909	8.52343	7.21585	7.83232	8.00884	6.91992	0.0184536	0.670658	1.14802	0.199148	up
Tcan_07344	gnlWGS:JPKZTcan_07344_1s_mrna	hypothetical protein Tcan_07344 [Toxocara canis]	8.30009	6.88079	6.65608	4.81099	6.58858	3.62752	0.0183621	0.670658	1.45317	0.539206	up
Tcan_05287	gnlWGS:JPKZTcan_05287_1s_mrna	Bestrophin-1 [Toxocara canis]	2.678	1.94231	1.52813	1.05351	1.93988	0.744072	0.0184876	0.670658	1.64508	0.718162	up
Tcan_17700	gnlWGS:JPKZTcan_17700_1s_mrna	hypothetical protein Tcan_17700 [Toxocara canis]	2.0914	2.12172	2.44435	1.68267	1.47566	1.02438	0.0185622	0.671958	1.59166	0.670535	up
Tcan_12767	gnlWGS:JPKZTcan_12767_1s_mrna	Copine family protein 2 [Toxocara canis]	16.7641	8.37166	5.81074	21.2673	28.4771	11.0632	0.018648	0.67226	0.508926	-0.974473	down
Tcan_12622	gnlWGS:JPKZTcan_12622_1s_mrna	Cyclin-dependent kinase-like 4 [Toxocara canis]	9.01194	9.02893	5.74014	13.7503	12.689	9.03578	0.0186357	0.67226	0.670358	-0.576997	down
Tcan_07371	gnlWGS:JPKZTcan_07371_1s_mrna	hypothetical protein Tcan_07371 [Toxocara canis]	3.26198	3.87202	2.67693	5.28421	7.32964	4.83322	0.0187675	0.673501	0.562325	-0.830523	down
Tcan_12779	gnlWGS:JPKZTcan_12779_1s_mrna	Sodium/potassium-transporting ATPase subunit alpha [Toxocara canis]	36.6531	31.7068	22.6125	41.1358	43.2227	31.6499	0.0188378	0.673501	0.784188	-0.350729	down
Tcan_06670	gnlWGS:JPKZTcan_06670_1s_mrna	unnamed protein product [Toxocara canis]	8.41388	9.02753	6.9523	6.71699	7.4937	6.06442	0.0187436	0.673501	1.20314	0.2668	up
Tcan_14388	gnlWGS:JPKZTcan_14388_1s_mrna	Golgi to ER traffic protein 4 -like protein [Toxocara canis]	10.9724	10.1604	10.501	8.73306	9.10891	7.56209	0.0188087	0.673501	1.24523	0.316409	up
Tcan_15480	gnlWGS:JPKZTcan_15480_1s_mrna	Uncharacterized protein R07B1.3 [Toxocara canis]	1.11598	1.31638	1.13066	1.93448	2.07735	1.77187	0.019121	0.679421	0.616047	-0.698889	down
Tcan_13121	gnlWGS:JPKZTcan_13121_1s_mrna	Netrin receptor DCC [Toxocara canis]	19.2632	14.4857	10.8291	11.9616	14.3721	9.38846	0.0190697	0.679421	1.24791	0.31951	up
Tcan_05483	gnlWGS:JPKZTcan_05483_1s_mrna	Valine--tRNA ligase [Toxocara canis]	12.5908	12.4578	11.5244	9.34722	8.85847	9.76832	0.0191006	0.679421	1.30739	0.386692	up
Tcan_11167	gnlWGS:JPKZTcan_11167_1s_mrna	hypothetical protein Tcan_11167 [Toxocara canis]	10.1124	10.2401	7.41291	7.85243	7.54842	7.20137	0.019214	0.68133	1.22844	0.296826	up
Tcan_16541	gnlWGS:JPKZTcan_16541_1s_mrna	85/88 kDa calcium-independent phospholipase A2 [Toxocara canis]	10.069	9.05451	6.98806	8.21474	8.03488	6.90035	0.0193715	0.685513	1.12793	0.173677	up
Tcan_07197	gnlWGS:JPKZTcan_07197_1s_mrna	Titin [Toxocara canis]	11.1977	6.3375	3.33076	16.2186	18.1222	6.67501	0.0196515	0.687008	0.508729	-0.975031	down
Tcan_06841	gnlWGS:JPKZTcan_06841_1s_mrna	Ligand-gated ion channel 50 [Toxocara canis]	8.00941	8.23902	5.30516	12.0516	9.71679	9.3855	0.0196104	0.687008	0.691843	-0.531484	down
Tcan_00531	gnlWGS:JPKZTcan_00531_1s_mrna	hypothetical protein Tcan_00531, partial [Toxocara canis]	40.7343	32.1849	31.6533	48.1366	52.2207	41.0176	0.0196277	0.687008	0.739682	-0.435023	down
Tcan_15414	gnlWGS:JPKZTcan_15414_1s_mrna	Membrane-associated phosphatidylinositol transfer protein 1 [Toxocara canis]	12.7134	11.4797	9.48875	14.82	17.0913	11.916	0.0195766	0.687008	0.768513	-0.379858	down
Tcan_11939	gnlWGS:JPKZTcan_11939_1s_mrna	hypothetical protein Tcan_11939 [Toxocara canis]	28.0102	24.3279	18.9671	21.6318	23.5084	14.3485	0.0195434	0.687008	1.19863	0.261392	up
Tcan_09923	gnlWGS:JPKZTcan_09923_1s_mrna	unnamed protein product [Toxocara canis]	7.42014	8.42825	7.07418	6.77417	3.70058	3.71534	0.0194944	0.687008	1.61539	0.691885	up
Tcan_06114	gnlWGS:JPKZTcan_06114_1s_mrna	Putative nudix hydrolase 2 [Toxocara canis]	2.13431	1.27121	1.04285	3.60365	2.97947	1.97037	0.0197605	0.689431	0.520065	-0.943237	down
Tcan_09738	gnlWGS:JPKZTcan_09738_1s_mrna	hypothetical protein Tcan_09738 [Toxocara canis]	44.0837	45.047	44.2598	35.698	36.0496	34.322	0.0198681	0.690408	1.25758	0.330646	up
Tcan_07963	gnlWGS:JPKZTcan_07963_1s_mrna	Basement membrane-specific heparan sulfate proteoglycan core protein [Toxocara canis]	6.93024	4.62818	5.7793	3.35304	3.47718	4.37369	0.0198582	0.690408	1.54747	0.629911	up
Tcan_02420	gnlWGS:JPKZTcan_02420_1s_mrna	hypothetical protein Tcan_02420 [Toxocara canis]	10.4057	8.1131	5.81774	11.4922	17.4505	11.8364	0.0201413	0.695216	0.596791	-0.744702	down
Tcan_04565	gnlWGS:JPKZTcan_04565_1s_mrna	3-demethylubiquinone-9 3-methyltransferase [Toxocara canis]	88.3398	76.5125	63.0512	100.651	102.779	77.6775	0.0200975	0.695216	0.810736	-0.302696	down
Tcan_03532	gnlWGS:JPKZTcan_03532_1s_mrna	hypothetical protein Tcan_03532 [Toxocara canis]	35.7958	35.2218	25.184	29.5962	29.7127	25.2118	0.0201196	0.695216	1.1382	0.186754	up
Tcan_06063	gnlWGS:JPKZTcan_06063_1s_mrna	Ras-related protein Rab-5C [Toxocara canis]	6.92342	6.1059	5.08377	5.61966	3.7555	3.42078	0.0201669	0.695216	1.41553	0.501347	up
Tcan_02112	gnlWGS:JPKZTcan_02112_1s_mrna	putative V-type proton ATPase subunit [Toxocara canis]	0	0	0	7.41357	8.45498	0	0.0202969	0.69555	1.89053e-05	-15.6908	down
Tcan_00490	gnlWGS:JPKZTcan_00490_1s_mrna	hypothetical protein Tcan_00490, partial [Toxocara canis]	5.5825	6.38366	6.22921	5.17303	3.96495	2.88111	0.0202648	0.69555	1.51387	0.598244	up
Tcan_06499	gnlWGS:JPKZTcan_06499_1s_mrna	Cyclin-dependent kinase 1 [Toxocara canis]	0.750648	0.725574	1.27921	0.612471	0.302875	0.134732	0.0202356	0.69555	2.62403	1.39178	up
Tcan_07010	gnlWGS:JPKZTcan_07010_1s_mrna	putative trans-2-enoyl-CoA reductase 2, mitochondrial [Toxocara canis]	1.57679	1.23314	1.54476	2.41231	2.75848	2.21384	0.0204517	0.698688	0.589696	-0.761958	down
Tcan_07602	gnlWGS:JPKZTcan_07602_1s_mrna	C-terminal-binding protein 2 [Toxocara canis]	22.3391	19.5174	18.2833	13.0314	14.5124	16.3848	0.0205094	0.698688	1.36903	0.453156	up
Tcan_00367	gnlWGS:JPKZTcan_00367_1s_mrna	Intramembrane protease 2, partial [Toxocara canis]	21.2094	21.1509	24.3464	15.4434	12.8452	16.4645	0.0204723	0.698688	1.49055	0.575843	up
Tcan_12072	gnlWGS:JPKZTcan_12072_1s_mrna	hypothetical protein Tcan_12072 [Toxocara canis]	0	0	0	1.92009	0	1.76386	0.0206449	0.701926	8.14342e-05	-13.584	down
Tcan_03007	gnlWGS:JPKZTcan_03007_1s_mrna	hypothetical protein Tcan_03007 [Toxocara canis]	7.37634	7.94619	5.96174	5.71572	5.39671	2.97665	0.0206902	0.702091	1.51069	0.59521	up
Tcan_06496	gnlWGS:JPKZTcan_06496_1s_mrna	Gut esterase 1 [Toxocara canis]	5.84288	4.90347	4.73632	7.90265	7.80147	5.74263	0.0209741	0.708949	0.721912	-0.470104	down
Tcan_11462	gnlWGS:JPKZTcan_11462_1s_mrna	Guanine nucleotide-binding proteinG(q) subunit alpha [Toxocara canis]	31.9317	29.8407	22.699	24.8514	22.2227	21.2825	0.0209447	0.708949	1.23575	0.305382	up
Tcan_02281	gnlWGS:JPKZTcan_02281_1s_mrna	putative beta-mannosidase [Toxocara canis]	6.10979	3.5932	3.34687	7.76384	8.51542	5.72185	0.0210629	0.710567	0.593146	-0.753541	down
Tcan_03145	gnlWGS:JPKZTcan_03145_1s_mrna	Nuclear hormone receptor family member nhr-47 [Toxocara canis]	11.1535	11.2231	8.44986	9.77868	9.67569	7.30453	0.0213952	0.71898	1.15201	0.20415	up
Tcan_05986	gnlWGS:JPKZTcan_05986_1s_mrna	Protein transport protein Sec23B [Toxocara canis]	29.7113	24.4537	28.7812	21.1013	19.4174	20.9362	0.0213953	0.71898	1.34971	0.432651	up
Tcan_02670	gnlWGS:JPKZTcan_02670_1s_mrna	hypothetical protein Tcan_02670 [Toxocara canis]	0	0.070926	0	0.119178	0.32862	0.434	0.0216642	0.719651	0.0804334	-3.63606	down
Tcan_02896	gnlWGS:JPKZTcan_02896_1s_mrna	Calpain-7 [Toxocara canis]	0.737868	0	0.27319	3.22787	3.02598	0.43203	0.0216387	0.719651	0.151223	-2.72525	down
Tcan_09309	gnlWGS:JPKZTcan_09309_1s_mrna	hypothetical protein Tcan_09309 [Toxocara canis]	3.64021	2.87752	2.05754	4.82163	4.74184	3.29964	0.0215858	0.719651	0.666656	-0.584986	down
Tcan_12739	gnlWGS:JPKZTcan_12739_1s_mrna	hypothetical protein Tcan_12739 [Toxocara canis]	12.027	11.9501	10.1578	16.2223	16.485	14.6	0.021588	0.719651	0.721557	-0.470814	down
Tcan_09744	gnlWGS:JPKZTcan_09744_1s_mrna	Putative transcription factor SOX-14 [Toxocara canis]	5.13961	4.41374	3.89925	3.99365	3.47824	3.31149	0.0215532	0.719651	1.24753	0.319076	up
Tcan_16912	gnlWGS:JPKZTcan_16912_1s_mrna	Carboxypeptidase A1 [Toxocara canis]	7.09639	4.90304	3.57838	4.49383	3.6888	1.73625	0.0215618	0.719651	1.57052	0.651244	up
Tcan_16957	gnlWGS:JPKZTcan_16957_1s_mrna	putative serine/threonine-protein kinase [Toxocara canis]	0.23001	0.171521	0.125951	0.502034	0.642689	0.233434	0.0217143	0.719935	0.382744	-1.38555	down
Tcan_03912	gnlWGS:JPKZTcan_03912_1s_mrna	Methyltransferase-like protein 13 [Toxocara canis]	42.6935	36.6381	21.7924	29.8331	27.4438	22.2831	0.021864	0.723514	1.27104	0.346008	up
Tcan_09371	gnlWGS:JPKZTcan_09371_1s_mrna	hypothetical protein Tcan_09371 [Toxocara canis]	11.1912	9.18807	8.29469	8.30294	8.16794	7.69422	0.0219408	0.723913	1.18659	0.246818	up
Tcan_15500	gnlWGS:JPKZTcan_15500_1s_mrna	TBC1 domain family member 8B [Toxocara canis]	7.2388	6.78084	5.33695	5.09689	5.59177	3.6558	0.0219595	0.723913	1.34941	0.432331	up
Tcan_13040	gnlWGS:JPKZTcan_13040_1s_mrna	hypothetical protein Tcan_13040 [Toxocara canis]	16.4557	12.3113	9.5961	19.691	23.524	13.7265	0.0220625	0.724296	0.673728	-0.569762	down
Tcan_12211	gnlWGS:JPKZTcan_12211_1s_mrna	hypothetical protein Tcan_12211 [Toxocara canis]	11.2446	10.3607	7.82228	15.2389	15.7407	10.5389	0.0221722	0.724296	0.708783	-0.496585	down
Tcan_04515	gnlWGS:JPKZTcan_04515_1s_mrna	Multiple epidermal growth factor-like domains protein 10 [Toxocara canis]	9.25619	7.49285	6.33777	7.40955	7.2978	5.82486	0.0220899	0.724296	1.12442	0.16918	up
Tcan_06767	gnlWGS:JPKZTcan_06767_1s_mrna	Metal transporter CNNM4 [Toxocara canis]	17.4224	14.6609	15.0584	14.9694	13.9376	10.673	0.02218	0.724296	1.19105	0.252234	up
Tcan_03568	gnlWGS:JPKZTcan_03568_1s_mrna	hypothetical protein Tcan_03568 [Toxocara canis]	0.172032	0.123811	0.244786	0	0	0	0.0221512	0.724296	1802.1	10.8155	up
Tcan_06312	gnlWGS:JPKZTcan_06312_1s_mrna	T-complex protein 1 subunit epsilon, partial [Toxocara canis]	63.0876	61.6427	58.9323	49.6137	51.6842	48.4924	0.0222603	0.725552	1.22613	0.294114	up
Tcan_02439	gnlWGS:JPKZTcan_02439_1s_mrna	Nucleosome-remodeling factor subunit, partial [Toxocara canis]	1.3315	0.68952	0.276398	0.28134	0.168238	0	0.0223267	0.726352	5.11016	2.35337	up
Tcan_14538	gnlWGS:JPKZTcan_14538_1s_mrna	Tyrosine-protein phosphatase 69D [Toxocara canis]	0	0	0	0.166543	0.230158	0	0.0224932	0.730398	0.000756237	-10.3689	down
Tcan_08720	gnlWGS:JPKZTcan_08720_1s_mrna	Peptidyl-prolyl cis-trans isomerase [Toxocara canis]	37.9424	37.3774	32.6554	51.2383	51.9272	39.9725	0.0227641	0.7358	0.754344	-0.406706	down
Tcan_12572	gnlWGS:JPKZTcan_12572_1s_mrna	ER degradation-enhancing alpha-mannosidase-like protein 2 [Toxocara canis]	21.56	21.1221	14.568	16.4489	19.1766	14.3529	0.0227869	0.7358	1.14549	0.19597	up
Tcan_12210	gnlWGS:JPKZTcan_12210_1s_mrna	hypothetical protein Tcan_12210 [Toxocara canis]	1.18859	0.892092	0.497384	0.495936	0.442506	0.339068	0.022747	0.7358	2.01804	1.01295	up
Tcan_00174	gnlWGS:JPKZTcan_00174_1s_mrna	hypothetical protein Tcan_00174, partial [Toxocara canis]	1226.56	980.02	620.667	825.065	868.123	548.932	0.0230183	0.741892	1.26097	0.334536	up
Tcan_09013	gnlWGS:JPKZTcan_09013_1s_mrna	5-hydroxytryptamine receptor 1 [Toxocara canis]	3.10563	3.67333	4.29566	2.42552	2.35114	2.46134	0.0230838	0.742622	1.53007	0.613595	up
Tcan_16084	gnlWGS:JPKZTcan_16084_1s_mrna	hypothetical protein Tcan_16084 [Toxocara canis]	4.49459	4.29839	2.26904	2.48665	3.37316	1.7794	0.0231448	0.743207	1.44806	0.534121	up
Tcan_15262	gnlWGS:JPKZTcan_15262_1s_mrna	hypothetical protein Tcan_15262 [Toxocara canis]	21.3817	17.9117	16.1076	24.1237	28.3107	23.324	0.0232447	0.743687	0.731286	-0.451493	down
Tcan_14446	gnlWGS:JPKZTcan_14446_1s_mrna	ADP-ribosylation factor 6 [Toxocara canis]	28.2987	24.5674	27.5622	19.1597	21.4638	20.7569	0.0232456	0.743687	1.31032	0.389922	up
Tcan_03884	gnlWGS:JPKZTcan_03884_1s_mrna	FMRFamide receptor [Toxocara canis]	1.39764	0.747658	0.843062	2.13383	1.73425	1.80554	0.0233191	0.744666	0.526713	-0.924911	down
Tcan_17472	gnlWGS:JPKZTcan_17472_1s_mrna	hypothetical protein Tcan_17472 [Toxocara canis]	15.3192	15.35	11.8631	12.1472	14.731	8.75194	0.0233765	0.745126	1.19372	0.255465	up
Tcan_17332	gnlWGS:JPKZTcan_17332_1s_mrna	Pyrophosphatase PpaX [Toxocara canis]	145.597	142.197	108.31	123.923	132.242	106.785	0.0234607	0.746437	1.09135	0.126109	up
Tcan_07523	gnlWGS:JPKZTcan_07523_1s_mrna	hypothetical protein Tcan_07523 [Toxocara canis]	50.3599	46.0134	36.2565	56.9685	62.2194	45.3746	0.0235093	0.746613	0.805954	-0.311231	down
Tcan_03478	gnlWGS:JPKZTcan_03478_1s_mrna	hypothetical protein Tcan_03478 [Toxocara canis]	0	0.057493	0	0	1.23902	0.878974	0.0235802	0.747497	0.027145	-5.20317	down
Tcan_02692	gnlWGS:JPKZTcan_02692_1s_mrna	hypothetical protein Tcan_02692 [Toxocara canis]	0	0	0	7.94565	0	0	0.0238319	0.74937	3.77565e-05	-14.6929	down
Tcan_03488	gnlWGS:JPKZTcan_03488_1s_mrna	hypothetical protein Tcan_03488 [Toxocara canis]	2.30115	1.40318	1.4357	2.17187	5.90643	2.98959	0.0238554	0.74937	0.464409	-1.10653	down
Tcan_05792	gnlWGS:JPKZTcan_05792_1s_mrna	Band 4.1-like protein 1 [Toxocara canis]	35.3381	23.4794	22.4648	22.6655	25.7482	18.4004	0.0238132	0.74937	1.21654	0.282789	up
Tcan_13924	gnlWGS:JPKZTcan_13924_1s_mrna	hypothetical protein Tcan_13924 [Toxocara canis]	11.1234	12.7502	10.2359	9.36334	10.2535	8.29672	0.0237328	0.74937	1.22197	0.28921	up
Tcan_03072	gnlWGS:JPKZTcan_03072_1s_mrna	PAS domain-containing serine/threonine-protein kinase [Toxocara canis]	10.5714	9.04707	6.67769	7.0987	8.78417	4.76869	0.0237051	0.74937	1.27332	0.348601	up
Tcan_04112	gnlWGS:JPKZTcan_04112_1s_mrna	hypothetical protein Tcan_04112 [Toxocara canis]	2.16718	2.40375	1.727	3.49914	3.49816	3.13461	0.0239991	0.751162	0.621593	-0.685957	down
Tcan_15700	gnlWGS:JPKZTcan_15700_1s_mrna	Serine/threonine-protein phosphatase 4 regulatory subunit 3 [Toxocara canis]	57.457	51.3616	41.4856	43.6713	48.6188	40.4087	0.0239625	0.751162	1.13267	0.179729	up
Tcan_12523	gnlWGS:JPKZTcan_12523_1s_mrna	RNA-binding protein 47 [Toxocara canis]	9.18912	8.60865	7.91746	12.2158	12.5303	10.5415	0.0241269	0.753083	0.728732	-0.45654	down
Tcan_05010	gnlWGS:JPKZTcan_05010_1s_mrna	Adducin-related protein 1 [Toxocara canis]	40.5634	35.8691	29.716	35.4163	35.3868	27.9276	0.0241473	0.753083	1.07513	0.104513	up
Tcan_02989	gnlWGS:JPKZTcan_02989_1s_mrna	Serine/threonine-protein kinase ULK3 [Toxocara canis]	9.13281	8.51844	8.2344	6.81323	7.95329	6.65336	0.0242125	0.753761	1.20849	0.273202	up
Tcan_10384	gnlWGS:JPKZTcan_10384_1s_mrna	hypothetical protein Tcan_10384 [Toxocara canis]	8.07224	10.0051	6.63798	12.3995	13.0203	9.69161	0.024396	0.758113	0.70391	-0.506537	down
Tcan_17066	gnlWGS:JPKZTcan_17066_1s_mrna	Calmodulin-lysine N-methyltransferase [Toxocara canis]	4.0355	3.36222	2.23151	1.85863	2.22863	2.35462	0.0245013	0.760023	1.49479	0.579939	up
Tcan_14131	gnlWGS:JPKZTcan_14131_1s_mrna	putative 28S ribosomal protein S16, mitochondrial [Toxocara canis]	24.2206	25.3555	14.186	18.9577	18.1688	12.5564	0.0246751	0.764048	1.28338	0.35995	up
Tcan_07694	gnlWGS:JPKZTcan_07694_1s_mrna	Bardet-Biedl syndrome 7 -like protein [Toxocara canis]	9.69989	9.52023	7.33348	13.6445	12.2235	10.768	0.0249756	0.767868	0.724796	-0.464353	down
Tcan_12102	gnlWGS:JPKZTcan_12102_1s_mrna	F-box/WD repeat-containing protein 1A [Toxocara canis]	12.8616	11.2757	9.12816	8.75771	11.1887	8.53288	0.024911	0.767868	1.16806	0.224116	up
Tcan_17654	gnlWGS:JPKZTcan_17654_1s_mrna	hypothetical protein Tcan_17654 [Toxocara canis]	23.082	20.2339	22.0375	18.0259	18.71	16.6373	0.0248485	0.767868	1.22446	0.292147	up
Tcan_11886	gnlWGS:JPKZTcan_11886_1s_mrna	Serine palmitoyltransferase 1 [Toxocara canis]	16.3645	12.9573	8.89815	9.61824	11.1424	9.07429	0.0249586	0.767868	1.28105	0.357323	up
Tcan_11796	gnlWGS:JPKZTcan_11796_1s_mrna	hypothetical protein Tcan_11796 [Toxocara canis]	0	0.079022	0	0.459575	0.083747	0.372232	0.025028	0.768115	0.0863106	-3.53432	down
Tcan_14077	gnlWGS:JPKZTcan_14077_1s_mrna	hypothetical protein Tcan_14077 [Toxocara canis]	2343.67	2374.71	2418.84	1881.4	1693.8	1899.06	0.0251022	0.769032	1.30378	0.3827	up
Tcan_02481	gnlWGS:JPKZTcan_02481_1s_mrna	unnamed protein product [Toxocara canis]	69.0883	46.2737	37.0637	72.9362	86.0868	55.6333	0.0252009	0.770696	0.710092	-0.493923	down
Tcan_12758	gnlWGS:JPKZTcan_12758_1s_mrna	GTP-binding protein GEM [Toxocara canis]	4.71865	3.46754	2.47443	5.25682	5.42584	4.72639	0.0253223	0.771728	0.691841	-0.531487	down
Tcan_11494	gnlWGS:JPKZTcan_11494_1s_mrna	unnamed protein product [Toxocara canis]	23.7789	22.3987	24.7962	18.8657	21.3928	16.7196	0.0253237	0.771728	1.24563	0.316876	up
Tcan_03521	gnlWGS:JPKZTcan_03521_1s_mrna	hypothetical protein Tcan_03521 [Toxocara canis]	22.9782	24.0515	14.0825	28.1997	33.0753	24.9963	0.0253761	0.771967	0.708372	-0.49742	down
Tcan_11713	gnlWGS:JPKZTcan_11713_1s_mrna	Neuropeptide FF receptor 2 [Toxocara canis]	3.89655	3.6761	2.0337	5.06588	5.45876	4.04196	0.025437	0.772465	0.659477	-0.600605	down
Tcan_06736	gnlWGS:JPKZTcan_06736_1s_mrna	hypothetical protein Tcan_06736 [Toxocara canis]	19.5371	16.2166	11.4357	22.4279	29.0065	18.2651	0.0255104	0.773338	0.677041	-0.562686	down
Tcan_07328	gnlWGS:JPKZTcan_07328_1s_mrna	hypothetical protein Tcan_07328 [Toxocara canis]	0	0	0	9.74367	0	0	0.0256225	0.774033	3.07892e-05	-14.9872	down
Tcan_03582	gnlWGS:JPKZTcan_03582_1s_mrna	hypothetical protein Tcan_03582 [Toxocara canis]	15.1648	14.3351	11.1749	12.3288	11.4932	8.58234	0.0256071	0.774033	1.25522	0.327945	up
Tcan_17802	gnlWGS:JPKZTcan_17802_1s_mrna	Transthyretin-like protein 15 [Toxocara canis]	0	0	0	0.079577	0.555063	0	0.0258729	0.77427	0.000472709	-11.0468	down
Tcan_15609	gnlWGS:JPKZTcan_15609_1s_mrna	hypothetical protein Tcan_15609 [Toxocara canis]	0	0.111818	0.137234	0.604718	0.698071	0.359634	0.0257012	0.77427	0.149813	-2.73877	down
Tcan_11797	gnlWGS:JPKZTcan_11797_1s_mrna	putative vesicular glutamate transporter vglu-3 [Toxocara canis]	21.1107	18.2374	13.3713	24.4517	24.396	18.2031	0.0257346	0.77427	0.78626	-0.346922	down
Tcan_18816	gnlWGS:JPKZTcan_18816_1s_mrna	Mechanosensory protein 2 [Toxocara canis]	39.4546	34.6381	28.2683	42.5343	47.0944	37.5345	0.025797	0.77427	0.804958	-0.313015	down
Tcan_04619	gnlWGS:JPKZTcan_04619_1s_mrna	Alpha-N-acetylgalactosaminidase [Toxocara canis]	41.0596	42.5394	34.0198	34.1021	32.274	31.9814	0.0258456	0.77427	1.19583	0.258011	up
Tcan_14597	gnlWGS:JPKZTcan_14597_1s_mrna	Polycomb group RING finger protein 2 [Toxocara canis]	3.65692	4.78191	3.44235	3.18266	2.81161	2.42476	0.0258983	0.77427	1.41123	0.496953	up
Tcan_13307	gnlWGS:JPKZTcan_13307_1s_mrna	hypothetical protein Tcan_13307 [Toxocara canis]	0	0	0	0.087407	0.413359	0	0.0260288	0.77427	0.000599082	-10.705	down
Tcan_16684	gnlWGS:JPKZTcan_16684_1s_mrna	hypothetical protein Tcan_16684 [Toxocara canis]	45.6981	36.436	22.653	54.3716	55.6446	37.7386	0.0260769	0.77427	0.709195	-0.495745	down
Tcan_16311	gnlWGS:JPKZTcan_16311_1s_mrna	hypothetical protein Tcan_16311 [Toxocara canis]	68.5225	67.4746	46.6959	76.4991	90.8236	76.7749	0.0260276	0.77427	0.748443	-0.418036	down
Tcan_07696	gnlWGS:JPKZTcan_07696_1s_mrna	Myosin-7 [Toxocara canis]	19.4653	16.3246	12.1493	21.3885	23.674	16.2491	0.0260567	0.77427	0.781894	-0.354955	down
Tcan_16213	gnlWGS:JPKZTcan_16213_1s_mrna	putative serine carboxypeptidase F41C3.5 [Toxocara canis]	115.517	109.215	86.0632	130.85	138.993	119.139	0.0262253	0.774698	0.798994	-0.323743	down
Tcan_17246	gnlWGS:JPKZTcan_17246_1s_mrna	DmX-like protein 1 [Toxocara canis]	10.6275	7.39527	7.32201	7.87183	7.78183	4.48811	0.0262103	0.774698	1.25832	0.3315	up
Tcan_15679	gnlWGS:JPKZTcan_15679_1s_mrna	Sushi, von Willebrand factor type A, EGF and pentraxin domain-containing protein 1 [Toxocara canis]	0.890473	0.740875	0.633376	0.517544	0.756056	0.301787	0.0261829	0.774698	1.43757	0.523629	up
Tcan_11517	gnlWGS:JPKZTcan_11517_1s_mrna	Bardet-Biedl syndrome 2 -like protein [Toxocara canis]	5.4683	1.77193	1.36249	8.07808	5.97494	5.7724	0.0263591	0.777324	0.433924	-1.20449	down
Tcan_12084	gnlWGS:JPKZTcan_12084_1s_mrna	Protein unc-1 [Toxocara canis]	24.8644	22.7708	17.4428	30.9891	30.0798	22.1405	0.0264671	0.777892	0.782099	-0.354577	down
Tcan_11647	gnlWGS:JPKZTcan_11647_1s_mrna	Uncharacterized protein Tcan_11647 [Toxocara canis]	6.64543	7.23951	3.90492	4.27316	5.163	4.11263	0.0264681	0.777892	1.31302	0.39289	up
Tcan_17106	gnlWGS:JPKZTcan_17106_1s_mrna	hypothetical protein Tcan_17106 [Toxocara canis]	7.3289	7.75786	5.71474	5.68852	4.446	4.68326	0.0265247	0.778239	1.40382	0.489358	up
Tcan_14625	gnlWGS:JPKZTcan_14625_1s_mrna	Homeobox protein SIX4 [Toxocara canis]	0	0	0	0.058886	0.067506	0.098977	0.0267398	0.782145	0.00133115	-9.55311	down
Tcan_09992	gnlWGS:JPKZTcan_09992_1s_mrna	hypothetical protein Tcan_09992 [Toxocara canis]	5.89833	4.6859	4.47306	9.12053	8.95435	5.10796	0.026825	0.782145	0.649502	-0.622595	down
Tcan_11529	gnlWGS:JPKZTcan_11529_1s_mrna	Histone H1.5 [Toxocara canis]	1006.4	917.41	612.078	1175.86	1223.02	869.786	0.0267798	0.782145	0.775818	-0.36621	down
Tcan_10245	gnlWGS:JPKZTcan_10245_1s_mrna	Cathepsin Z [Toxocara canis]	242.525	206.075	150.855	268.042	264.242	216.707	0.0268834	0.782145	0.800351	-0.321295	down
Tcan_04735	gnlWGS:JPKZTcan_04735_1s_mrna	Golgi-specific brefeldin A-resistance guanine nucleotide exchange factor 1 [Toxocara canis]	10.4648	8.67793	9.82549	7.82372	7.61649	7.46198	0.0268704	0.782145	1.26487	0.338984	up
Tcan_15471	gnlWGS:JPKZTcan_15471_1s_mrna	Aggrecan core protein [Toxocara canis]	16.7482	16.7376	16.5457	12.4238	13.247	13.078	0.0269514	0.782808	1.29118	0.36869	up
Tcan_02080	gnlWGS:JPKZTcan_02080_1s_mrna	Myosin-IA [Toxocara canis]	8.18465	5.92077	4.12479	4.08119	3.50459	3.89588	0.0270169	0.783399	1.58777	0.667	up
Tcan_13203	gnlWGS:JPKZTcan_13203_1s_mrna	unnamed protein product [Toxocara canis]	20.9284	17.0382	13.2154	13.968	16.6533	11.6407	0.0271802	0.785509	1.21106	0.276276	up
Tcan_13834	gnlWGS:JPKZTcan_13834_1s_mrna	Leucine-rich repeat serine/threonine-protein kinase 1 [Toxocara canis]	5.93444	4.80459	5.27229	4.51061	4.63697	3.04579	0.0271389	0.785509	1.31312	0.392994	up
Tcan_15677	gnlWGS:JPKZTcan_15677_1s_mrna	Fibropellin-1 [Toxocara canis]	5.41147	4.72572	2.95105	6.18079	7.48037	4.65218	0.027354	0.789217	0.714683	-0.484624	down
Tcan_00790	gnlWGS:JPKZTcan_00790_1s_mrna	unnamed protein product [Toxocara canis]	4.83097	4.06958	3.27458	2.53587	3.75068	1.90798	0.0274585	0.790915	1.48576	0.571205	up
Tcan_00621	gnlWGS:JPKZTcan_00621_1s_mrna	hypothetical protein Tcan_00621, partial [Toxocara canis]	4.16702	4.28798	3.13342	3.02976	2.89913	2.70125	0.0275492	0.792212	1.34279	0.425229	up
Tcan_05091	gnlWGS:JPKZTcan_05091_1s_mrna	Metastasis-associated protein MTA3 [Toxocara canis]	21.7858	17.8569	15.6274	17.8918	16.9003	14.5671	0.0276547	0.792649	1.11975	0.163177	up
Tcan_17165	gnlWGS:JPKZTcan_17165_1s_mrna	hypothetical protein Tcan_17165 [Toxocara canis]	13.0963	12.8134	13.2783	10.4042	10.9132	9.76343	0.0276559	0.792649	1.26084	0.334391	up
Tcan_13502	gnlWGS:JPKZTcan_13502_1s_mrna	Guanylate cyclase receptor-type gcy-1 [Toxocara canis]	5.43225	2.89372	1.42814	8.99967	13.9292	3.27225	0.027765	0.794465	0.372278	-1.42555	down
Tcan_02649	gnlWGS:JPKZTcan_02649_1s_mrna	hypothetical protein Tcan_02649 [Toxocara canis]	0	0	2.13422	0	0	0	0.0278358	0.795179	7114.08	12.7965	up
Tcan_12781	gnlWGS:JPKZTcan_12781_1s_mrna	Mitochondrial import receptor subunit TOM70 [Toxocara canis]	10.4469	10.9709	9.12635	9.25025	9.27163	7.76054	0.0279155	0.796142	1.16215	0.216799	up
Tcan_16354	gnlWGS:JPKZTcan_16354_1s_mrna	Protein patched -like protein 1 [Toxocara canis]	26.6639	22.3385	18.8535	21.663	23.8031	17.3783	0.0280939	0.799916	1.07974	0.11069	up
Tcan_12651	gnlWGS:JPKZTcan_12651_1s_mrna	hypothetical protein Tcan_12651 [Toxocara canis]	3.67506	1.7251	0.832902	7.8879	5.84878	2.14665	0.0283498	0.801934	0.392428	-1.3495	down
Tcan_14959	gnlWGS:JPKZTcan_14959_1s_mrna	MTSS1-like protein [Toxocara canis]	4.34866	3.73582	2.55755	5.51684	5.82347	3.90536	0.0283295	0.801934	0.698036	-0.518626	down
Tcan_15902	gnlWGS:JPKZTcan_15902_1s_mrna	hypothetical protein Tcan_15902 [Toxocara canis]	72.2446	65.1073	58.578	85.5616	89.8764	77.8982	0.0283192	0.801934	0.773399	-0.370716	down
Tcan_17248	gnlWGS:JPKZTcan_17248_1s_mrna	hypothetical protein Tcan_17248 [Toxocara canis]	56.7362	51.8074	46.0785	44.0844	52.2537	40.5558	0.0283359	0.801934	1.1295	0.175688	up
Tcan_17796	gnlWGS:JPKZTcan_17796_1s_mrna	hypothetical protein Tcan_17796 [Toxocara canis]	10.7713	11.588	8.18697	7.89068	8.7622	8.24884	0.0283964	0.801943	1.22667	0.294752	up
Tcan_04027	gnlWGS:JPKZTcan_04027_1s_mrna	Sialin [Toxocara canis]	14.3142	14.1705	12.8984	11.7788	11.4012	11.0472	0.0285974	0.804999	1.20907	0.273898	up
Tcan_00612	gnlWGS:JPKZTcan_00612_1s_mrna	hypothetical protein Tcan_00612, partial [Toxocara canis]	2.58219	2.15643	2.28135	1.03268	1.27225	1.59879	0.0285693	0.804999	1.79828	0.846615	up
Tcan_11117	gnlWGS:JPKZTcan_11117_1s_mrna	Acetylcholine receptor-like protein cup-4 [Toxocara canis]	9.22872	10.1867	5.96446	4.68524	5.68198	6.56337	0.0286563	0.80535	1.49906	0.584054	up
Tcan_05468	gnlWGS:JPKZTcan_05468_1s_mrna	hypothetical protein Tcan_05468 [Toxocara canis]	0	0	0	0.054102	0.133982	0.100374	0.0287925	0.806561	0.00104001	-9.90918	down
Tcan_02459	gnlWGS:JPKZTcan_02459_1s_mrna	unnamed protein product [Toxocara canis]	0.399822	0.539384	0.89942	0	0	0.19061	0.0287641	0.806561	9.64601	3.26993	up
Tcan_00501	gnlWGS:JPKZTcan_00501_1s_mrna	hypothetical protein Tcan_00501, partial [Toxocara canis]	0.180924	0.688503	0.597014	0.648795	2.55535	2.73453	0.0289032	0.807055	0.246931	-2.01782	down
Tcan_11716	gnlWGS:JPKZTcan_11716_1s_mrna	Uncharacterized protein R07B1.8 [Toxocara canis]	4.31633	4.82049	3.06197	3.15205	3.69379	2.75191	0.028886	0.807055	1.271	0.345969	up
Tcan_16475	gnlWGS:JPKZTcan_16475_1s_mrna	DnaJ -like protein subfamily C member 10 [Toxocara canis]	17.992	18.8669	16.6857	14.0292	15.7577	14.4075	0.0289795	0.807884	1.21157	0.27688	up
Tcan_15683	gnlWGS:JPKZTcan_15683_1s_mrna	Protein O-linked-mannose beta-1,2-N-acetylglucosaminyltransferase 1 [Toxocara canis]	14.994	14.8259	11.2091	12.2308	13.0827	11.0985	0.0290331	0.808081	1.1268	0.172233	up
Tcan_07905	gnlWGS:JPKZTcan_07905_1s_mrna	Guanine nucleotide-binding proteinG(o) subunit alpha [Toxocara canis]	38.3555	38.6556	34.0217	32.1178	37.1836	27.7526	0.029258	0.813035	1.14403	0.194127	up
Tcan_01997	gnlWGS:JPKZTcan_01997_1s_mrna	hypothetical protein Tcan_01997 [Toxocara canis]	66.6323	56.5642	33.4503	90.9276	88.3215	53.3938	0.0296323	0.815595	0.673336	-0.570602	down
Tcan_10124	gnlWGS:JPKZTcan_10124_1s_mrna	hypothetical protein Tcan_10124 [Toxocara canis]	329.878	300.198	227.685	288.523	277.824	227.237	0.0294699	0.815595	1.08087	0.112192	up
Tcan_06054	gnlWGS:JPKZTcan_06054_1s_mrna	hypothetical protein Tcan_06054 [Toxocara canis]	52.538	39.698	33.3864	38.6781	42.0583	30.4113	0.0296097	0.815595	1.13023	0.176616	up
Tcan_12221	gnlWGS:JPKZTcan_12221_1s_mrna	Nose resistant to fluoxetine protein 6 [Toxocara canis]	10.1409	9.38481	8.70806	7.44272	9.58325	6.42504	0.0295095	0.815595	1.20395	0.267772	up
Tcan_08080	gnlWGS:JPKZTcan_08080_1s_mrna	RB1-inducible coiled-coil protein 1 [Toxocara canis]	9.84014	8.95084	5.94506	7.83916	6.86719	3.85663	0.0295697	0.815595	1.33255	0.414186	up
Tcan_05367	gnlWGS:JPKZTcan_05367_1s_mrna	hypothetical protein Tcan_05367 [Toxocara canis]	0.294033	0.620476	0.453439	0	0.084084	0.14493	0.0294086	0.815595	5.97321	2.57851	up
Tcan_07347	gnlWGS:JPKZTcan_07347_1s_mrna	Teneurin-2 [Toxocara canis]	0.311147	0.098274	0.124714	0.506976	0.832772	0.324942	0.0297897	0.815769	0.320862	-1.63998	down
Tcan_08935	gnlWGS:JPKZTcan_08935_1s_mrna	putative DNA replication complex GINS protein PSF2 [Toxocara canis]	8.52895	5.27507	3.70681	11.0957	10.9227	6.52635	0.0297561	0.815769	0.613452	-0.704977	down
Tcan_03016	gnlWGS:JPKZTcan_03016_1s_mrna	hypothetical protein Tcan_03016 [Toxocara canis]	38.9339	39.3339	29.0282	33.9174	35.2331	28.3633	0.029921	0.815769	1.10032	0.137918	up
Tcan_11408	gnlWGS:JPKZTcan_11408_1s_mrna	Sulfhydryl oxidase 1 [Toxocara canis]	37.7602	37.5055	29.8966	30.6142	32.7232	29.153	0.0298234	0.815769	1.13701	0.18524	up
Tcan_07279	gnlWGS:JPKZTcan_07279_1s_mrna	Host cell factor 1 [Toxocara canis]	8.54344	8.54403	9.05671	6.83899	7.14735	6.71897	0.0299111	0.815769	1.26268	0.336488	up
Tcan_16458	gnlWGS:JPKZTcan_16458_1s_mrna	Cyclin-dependent kinase 2-associated protein 2 [Toxocara canis]	43.9807	48.0195	49.6788	31.752	39.3493	35.3973	0.0298738	0.815769	1.33034	0.411791	up
Tcan_16983	gnlWGS:JPKZTcan_16983_1s_mrna	hypothetical protein Tcan_16983 [Toxocara canis]	0.054026	0	0	0.200475	0.208636	0.148855	0.0300277	0.817395	0.0968267	-3.36845	down
Tcan_14365	gnlWGS:JPKZTcan_14365_1s_mrna	E3 ubiquitin-protein ligase RING2 [Toxocara canis]	6.06704	5.07649	4.95393	4.69387	5.36884	3.4506	0.0301483	0.819392	1.19123	0.252452	up
Tcan_15957	gnlWGS:JPKZTcan_15957_1s_mrna	unnamed protein product [Toxocara canis]	12.0701	11.8038	8.15621	16.0215	16.1193	10.9623	0.030271	0.820156	0.743105	-0.428363	down
Tcan_14670	gnlWGS:JPKZTcan_14670_1s_mrna	Autophagy-related protein 13 -like protein [Toxocara canis]	13.4726	14.3386	15.1505	10.6523	10.8583	10.5812	0.030232	0.820156	1.33871	0.420848	up
Tcan_17853	gnlWGS:JPKZTcan_17853_1s_mrna	hypothetical protein Tcan_17853 [Toxocara canis]	2.14479	1.97141	1.48365	2.99918	3.00813	2.50134	0.0304372	0.823371	0.658137	-0.603541	down
Tcan_13927	gnlWGS:JPKZTcan_13927_1s_mrna	putative 39S ribosomal protein L19, mitochondrial [Toxocara canis]	52.5532	53.0791	46.2649	44.6537	45.8912	40.6997	0.0305846	0.82607	1.15736	0.210839	up
Tcan_12689	gnlWGS:JPKZTcan_12689_1s_mrna	Alkaline ceramidase [Toxocara canis]	45.1779	39.6877	34.3191	37.1455	42.4291	28.6417	0.0307244	0.828556	1.10136	0.13928	up
Tcan_17607	gnlWGS:JPKZTcan_17607_1s_mrna	Alkyldihydroxyacetonephosphate synthase [Toxocara canis]	39.6927	38.1153	38.5081	29.6601	32.2886	31.3461	0.0307835	0.828859	1.24676	0.318182	up
Tcan_14964	gnlWGS:JPKZTcan_14964_1s_mrna	Zinc metalloproteinase nas-30 [Toxocara canis]	0.152772	0.109263	0.068745	0.042693	0	0	0.0309314	0.831552	7.74787	2.9538	up
Tcan_09841	gnlWGS:JPKZTcan_09841_1s_mrna	General transcription factor IIE subunit 2 [Toxocara canis]	7.19552	6.18516	5.27551	10.5062	8.77452	7.20525	0.0311752	0.836809	0.704381	-0.505572	down
Tcan_11498	gnlWGS:JPKZTcan_11498_1s_mrna	Guanine nucleotide-binding proteinG(q) subunit alpha [Toxocara canis]	65.6366	60.9841	54.1962	49.8984	53.4827	50.1712	0.0312287	0.836947	1.17756	0.2358	up
Tcan_07026	gnlWGS:JPKZTcan_07026_1s_mrna	RNA polymerase II elongation factor ELL [Toxocara canis]	39.4439	40.7203	35.8406	34.9441	37.2544	29.6859	0.0312914	0.837334	1.13859	0.18725	up
Tcan_11396	gnlWGS:JPKZTcan_11396_1s_mrna	ATP-dependent RNA helicase DDX3Y [Toxocara canis]	57.1191	55.6989	55.7924	45.6106	47.3476	45.1682	0.0315312	0.842452	1.2207	0.287706	up
Tcan_01154	gnlWGS:JPKZTcan_01154_1s_mrna	hypothetical protein Tcan_01154, partial [Toxocara canis]	17.3277	20.9625	17.2672	25.5097	28.9855	32.6623	0.0316385	0.842987	0.637437	-0.649645	down
Tcan_03709	gnlWGS:JPKZTcan_03709_1s_mrna	Peroxisomal carnitine O-octanoyltransferase [Toxocara canis]	3.7494	2.35972	2.37677	4.78278	3.89913	4.38224	0.0321346	0.842987	0.649556	-0.622474	down
Tcan_14601	gnlWGS:JPKZTcan_14601_1s_mrna	Cathepsin B-like cysteine proteinase 6 [Toxocara canis]	7.87727	6.91907	3.45712	9.49786	10.3731	7.26622	0.0319891	0.842987	0.672636	-0.572103	down
Tcan_11619	gnlWGS:JPKZTcan_11619_1s_mrna	DNA mismatch repair protein Mlh1 [Toxocara canis]	5.0692	4.78011	3.46392	7.30568	7.1909	4.33082	0.0319784	0.842987	0.70712	-0.499974	down
Tcan_03096	gnlWGS:JPKZTcan_03096_1s_mrna	Peroxidase mlt-7 [Toxocara canis]	29.1568	25.1631	18.9381	22.544	24.7017	19.2991	0.0320897	0.842987	1.10088	0.138662	up
Tcan_02567	gnlWGS:JPKZTcan_02567_1s_mrna	Monocarboxylate transporter 12 [Toxocara canis]	9.54248	8.66243	7.54476	7.4422	7.52176	6.84394	0.0318062	0.842987	1.18075	0.239703	up
Tcan_08860	gnlWGS:JPKZTcan_08860_1s_mrna	GDP-mannose 4,6 dehydratase 1, partial [Toxocara canis]	85.676	84.6339	76.3758	74.6364	65.1772	65.781	0.0316637	0.842987	1.19986	0.262872	up
Tcan_02967	gnlWGS:JPKZTcan_02967_1s_mrna	WD repeat-containing protein 26 -like protein [Toxocara canis]	17.6988	18.0946	17.9572	14.6774	16.9319	13.1634	0.0317239	0.842987	1.20052	0.263663	up
Tcan_11156	gnlWGS:JPKZTcan_11156_1s_mrna	hypothetical protein Tcan_11156 [Toxocara canis]	6.71631	4.6347	4.68123	4.13871	3.80307	3.72076	0.0320298	0.842987	1.37468	0.459093	up
Tcan_08220	gnlWGS:JPKZTcan_08220_1s_mrna	Nuclear pore membrane glycoprotein-like [Toxocara canis]	4.8175	4.23515	4.16972	3.67855	3.91706	1.78054	0.032037	0.842987	1.41021	0.495913	up
Tcan_00363	gnlWGS:JPKZTcan_00363_1s_mrna	hypothetical protein Tcan_00363 [Toxocara canis]	0.584044	1.00263	0.624328	0.250695	0.471855	0.233604	0.0320788	0.842987	2.3124	1.20939	up
Tcan_03904	gnlWGS:JPKZTcan_03904_1s_mrna	Krueppel-like factor 7, partial [Toxocara canis]	0.199134	0.641924	0.163687	0	0	0	0.0317812	0.842987	3349.15	11.7096	up
Tcan_13985	gnlWGS:JPKZTcan_13985_1s_mrna	hypothetical protein Tcan_13985 [Toxocara canis]	5.27278	0	0	0	0	0	0.0322273	0.844141	17575.9	14.1013	up
Tcan_16927	gnlWGS:JPKZTcan_16927_1s_mrna	Uncharacterized protein F52C9.5 [Toxocara canis]	0.179725	0.206745	0.138369	0.516927	0.895448	0.159485	0.0324585	0.848915	0.333897	-1.58253	down
Tcan_02424	gnlWGS:JPKZTcan_02424_1s_mrna	hypothetical protein Tcan_02424 [Toxocara canis]	5.82879	4.39601	2.91156	8.25964	8.4143	4.59795	0.0326049	0.85146	0.617545	-0.695383	down
Tcan_13498	gnlWGS:JPKZTcan_13498_1s_mrna	hypothetical protein Tcan_13498 [Toxocara canis]	4.31173	3.83359	1.59559	7.69956	7.48357	3.66016	0.0327694	0.851906	0.516944	-0.951921	down
Tcan_14504	gnlWGS:JPKZTcan_14504_1s_mrna	hypothetical protein Tcan_14504 [Toxocara canis]	0.753172	0.661588	0.431847	0.84755	1.46718	1.17947	0.0326922	0.851906	0.528478	-0.920086	down
Tcan_00024	gnlWGS:JPKZTcan_00024_1s_mrna	Ancylostoma secreted protein, partial [Toxocara canis]	94.0189	94.102	85.6333	83.05	80.7483	72.5664	0.0327465	0.851906	1.15819	0.211867	up
Tcan_07008	gnlWGS:JPKZTcan_07008_1s_mrna	Homeobox protein ceh-19 [Toxocara canis]	2.42686	1.80354	1.55932	3.82887	2.90146	2.93799	0.032981	0.852395	0.598833	-0.739775	down
Tcan_11318	gnlWGS:JPKZTcan_11318_1s_mrna	Transmembrane protein [Toxocara canis]	10.7546	10.8857	9.0341	8.6682	7.90543	8.19596	0.0329639	0.852395	1.23839	0.308463	up
Tcan_06575	gnlWGS:JPKZTcan_06575_1s_mrna	Hexosaminidase D [Toxocara canis]	63.7869	51.8444	30.1651	43.3309	38.9403	28.4375	0.0329848	0.852395	1.31694	0.397186	up
Tcan_13768	gnlWGS:JPKZTcan_13768_1s_mrna	unnamed protein product [Toxocara canis]	4.4165	4.8779	8.04517	4.65103	3.02921	2.76497	0.0329681	0.852395	1.66005	0.731227	up
Tcan_09016	gnlWGS:JPKZTcan_09016_1s_mrna	hypothetical protein Tcan_09016, partial [Toxocara canis]	0	0	0	5.81372	0	0	0.0330657	0.853214	5.16021e-05	-14.2422	down
Tcan_11773	gnlWGS:JPKZTcan_11773_1s_mrna	hypothetical protein Tcan_11773 [Toxocara canis]	6.53014	5.27218	5.51236	4.4462	5.50461	3.91014	0.0331229	0.853418	1.24917	0.32097	up
Tcan_07412	gnlWGS:JPKZTcan_07412_1s_mrna	Aspartic protease 6 [Toxocara canis]	2.30029	1.81912	2.18268	3.36338	3.68041	2.90933	0.0334594	0.855967	0.633177	-0.659319	down
Tcan_15270	gnlWGS:JPKZTcan_15270_1s_mrna	ATP-dependent RNA helicase DDX19A [Toxocara canis]	15.1217	13.712	11.1605	13.094	13.4924	10.0867	0.0333661	0.855967	1.09056	0.125072	up
Tcan_03755	gnlWGS:JPKZTcan_03755_1s_mrna	Uncharacterized protein R08C7.12 [Toxocara canis]	21.177	17.4716	14.599	16.1783	14.4446	14.1684	0.0334076	0.855967	1.18879	0.249498	up
Tcan_17781	gnlWGS:JPKZTcan_17781_1s_mrna	Dual specificity protein phosphatase 14 [Toxocara canis]	49.09	42.9078	38.7124	33.5308	36.6954	36.1212	0.0334046	0.855967	1.22909	0.297587	up
Tcan_05614	gnlWGS:JPKZTcan_05614_1s_mrna	Transmembrane 9 superfamily member 3 [Toxocara canis]	66.9717	68.3974	71.9856	50.3783	54.1197	56.0272	0.0334686	0.855967	1.29173	0.369301	up
Tcan_17184	gnlWGS:JPKZTcan_17184_1s_mrna	hypothetical protein Tcan_17184 [Toxocara canis]	0.796908	1.425	1.02765	1.70257	2.02793	3.05446	0.0335393	0.856511	0.478936	-1.0621	down
Tcan_04046	gnlWGS:JPKZTcan_04046_1s_mrna	Vesicle-fusing ATPase [Toxocara canis]	26.3424	25.1176	20.7467	20.0187	23.0003	19.9995	0.0336562	0.858232	1.1458	0.196357	up
Tcan_09261	gnlWGS:JPKZTcan_09261_1s_mrna	hypothetical protein Tcan_09261 [Toxocara canis]	0	0	0	0.534417	0.697259	0	0.0337548	0.859484	0.000243571	-12.0034	down
Tcan_14560	gnlWGS:JPKZTcan_14560_1s_mrna	hypothetical protein Tcan_14560 [Toxocara canis]	0	0	0	2.5092	0	0	0.033968	0.859493	0.00011956	-13.03	down
Tcan_02364	gnlWGS:JPKZTcan_02364_1s_mrna	hypothetical protein Tcan_02364 [Toxocara canis]	2.09045	1.7196	0.939779	2.98157	4.42728	1.93588	0.0338596	0.859493	0.50829	-0.976278	down
Tcan_03247	gnlWGS:JPKZTcan_03247_1s_mrna	Protein PRRC2A [Toxocara canis]	53.3451	48.943	45.7423	38.617	40.8186	41.8816	0.0339086	0.859493	1.22019	0.287109	up
Tcan_01988	gnlWGS:JPKZTcan_01988_1s_mrna	hypothetical protein Tcan_01988 [Toxocara canis]	6.97214	8.08339	5.46808	5.65521	6.26478	3.88397	0.034003	0.859493	1.29864	0.376998	up
Tcan_02327	gnlWGS:JPKZTcan_02327_1s_mrna	hypothetical protein Tcan_02327, partial [Toxocara canis]	9.12806	7.85276	7.70191	6.28676	6.97093	5.24704	0.0338536	0.859493	1.33386	0.415607	up
Tcan_00506	gnlWGS:JPKZTcan_00506_1s_mrna	hypothetical protein Tcan_00506, partial [Toxocara canis]	0.799453	1.66717	0.592636	3.45414	4.27716	1.1132	0.0342595	0.860367	0.345894	-1.5316	down
Tcan_05133	gnlWGS:JPKZTcan_05133_1s_mrna	Putative UDP-glucuronosyltransferase ugt-47 [Toxocara canis]	4.98933	3.51409	1.80414	6.33017	6.904	3.75825	0.034306	0.860367	0.606598	-0.721188	down
Tcan_02693	gnlWGS:JPKZTcan_02693_1s_mrna	Solute carrier family 22 member 6 [Toxocara canis]	18.6164	14.5397	10.2403	20.8605	19.4981	17.2259	0.0342931	0.860367	0.753613	-0.408105	down
Tcan_10767	gnlWGS:JPKZTcan_10767_1s_mrna	WD repeat-containing protein 75 [Toxocara canis]	8.60846	7.0992	5.85408	6.70024	7.3345	4.63329	0.0343337	0.860367	1.15501	0.207904	up
Tcan_01885	gnlWGS:JPKZTcan_01885_1s_mrna	hypothetical protein Tcan_01885 [Toxocara canis]	56.364	57.85	49.5158	40.4804	46.8252	43.9173	0.0343353	0.860367	1.24772	0.319297	up
Tcan_16582	gnlWGS:JPKZTcan_16582_1s_mrna	Serine/threonine-protein kinase WNK1 [Toxocara canis]	16.038	13.7605	8.79563	10.8996	12.2783	6.51292	0.0343264	0.860367	1.29987	0.378368	up
Tcan_17296	gnlWGS:JPKZTcan_17296_1s_mrna	Succinate dehydrogenase [ubiquinone] flavoprotein subunit, mitochondrial, partial [Toxocara canis]	0.682401	0.463214	0.274166	0.731134	1.45501	1.52101	0.0344632	0.862277	0.382984	-1.38464	down
Tcan_13793	gnlWGS:JPKZTcan_13793_1s_mrna	General transcription factor IIH subunit 3 [Toxocara canis]	13.0115	11.8225	10.0094	11.2665	10.0292	8.51326	0.034511	0.862277	1.1689	0.225146	up
Tcan_05519	gnlWGS:JPKZTcan_05519_1s_mrna	Sulfate permease family protein 3 [Toxocara canis]	10.8858	8.40257	7.35131	8.46283	8.64319	6.43981	0.0345711	0.862537	1.1314	0.178108	up
Tcan_17835	gnlWGS:JPKZTcan_17835_1s_mrna	putative G-protein coupled receptor [Toxocara canis]	2.01746	1.41384	0.889196	2.40936	2.48732	1.90523	0.0347434	0.864013	0.635188	-0.654744	down
Tcan_15077	gnlWGS:JPKZTcan_15077_1s_mrna	Threonylcarbamoyladenosine tRNA methylthiotransferase [Toxocara canis]	15.9691	14.6455	11.6879	19.5671	18.8546	14.5601	0.034776	0.864013	0.798433	-0.324757	down
Tcan_05633	gnlWGS:JPKZTcan_05633_1s_mrna	Isocitrate dehydrogenase [NAD] subunit gamma 1, mitochondrial [Toxocara canis]	69.6518	64.1514	54.537	83.3637	81.5601	69.9095	0.0347798	0.864013	0.802017	-0.318296	down
Tcan_02229	gnlWGS:JPKZTcan_02229_1s_mrna	unnamed protein product [Toxocara canis]	24.5388	16.4323	6.04209	33.8262	38.8794	18.1479	0.0350014	0.867452	0.517463	-0.950474	down
Tcan_11400	gnlWGS:JPKZTcan_11400_1s_mrna	hypothetical protein Tcan_11400 [Toxocara canis]	49.0915	47.7075	55.9272	35.3014	38.4964	40.293	0.0350182	0.867452	1.33864	0.420766	up
Tcan_18941	gnlWGS:JPKZTcan_18941_1s_mrna	Collagen alpha-1(IV) chain [Toxocara canis]	0	0	0	0.009032	0.018792	0.021794	0.0354798	0.867728	0.00604619	-7.36976	down
Tcan_04419	gnlWGS:JPKZTcan_04419_1s_mrna	Versican core protein [Toxocara canis]	7.45186	6.17432	3.0082	9.25354	16.664	6.2633	0.0354741	0.867728	0.516904	-0.952032	down
Tcan_13049	gnlWGS:JPKZTcan_13049_1s_mrna	hypothetical protein Tcan_13049 [Toxocara canis]	5.60825	4.01856	3.18303	6.19259	8.21065	4.89932	0.0354415	0.867728	0.663634	-0.591539	down
Tcan_00889	gnlWGS:JPKZTcan_00889_1s_mrna	hypothetical protein Tcan_00889, partial [Toxocara canis]	16.3553	14.9497	13.7962	19.3219	24.2611	21.8147	0.0351957	0.867728	0.689645	-0.536075	down
Tcan_05802	gnlWGS:JPKZTcan_05802_1s_mrna	hypothetical protein Tcan_05802 [Toxocara canis]	10.7969	9.27658	8.0292	13.3273	13.2134	10.8161	0.0352343	0.867728	0.752278	-0.410663	down
Tcan_10481	gnlWGS:JPKZTcan_10481_1s_mrna	NADH dehydrogenase [ubiquinone] complex I, assembly factor 7 -like protein [Toxocara canis]	37.3436	33.6098	25.2164	41.8845	42.1858	33.6286	0.0353817	0.867728	0.817084	-0.291444	down
Tcan_04967	gnlWGS:JPKZTcan_04967_1s_mrna	Putative glycosyltransferase C06E1.7 [Toxocara canis]	292.867	276.927	232.715	252.722	248.72	222.279	0.0351415	0.867728	1.10886	0.149082	up
Tcan_00221	gnlWGS:JPKZTcan_00221_1s_mrna	Ethanolaminephosphotransferase 1, partial [Toxocara canis]	19.487	16.925	14.5773	17.073	14.2598	11.6247	0.0353997	0.867728	1.18697	0.247282	up
Tcan_17376	gnlWGS:JPKZTcan_17376_1s_mrna	Alpha-1,6-mannosyl-glycoprotein 2-beta-N-acetylglucosaminyltransferase [Toxocara canis]	88.7981	97.8061	94.7834	73.2112	70.0819	76.2558	0.0354492	0.867728	1.28166	0.358017	up
Tcan_17339	gnlWGS:JPKZTcan_17339_1s_mrna	putative G-protein coupled receptor C02B8.5 [Toxocara canis]	2.4278	2.06678	1.17367	2.71984	2.94035	2.77047	0.0356484	0.869188	0.672338	-0.572741	down
Tcan_09817	gnlWGS:JPKZTcan_09817_1s_mrna	hypothetical protein Tcan_09817 [Toxocara canis]	28.1933	21.4436	19.9719	21.5067	21.2111	17.5189	0.0357622	0.869188	1.15559	0.208627	up
Tcan_14866	gnlWGS:JPKZTcan_14866_1s_mrna	ER degradation-enhancing alpha-mannosidase-like protein 3 [Toxocara canis]	28.1313	29.5692	27.6367	22.4042	24.3013	23.2076	0.0357901	0.869188	1.22062	0.287612	up
Tcan_14140	gnlWGS:JPKZTcan_14140_1s_mrna	Substance-P receptor [Toxocara canis]	18.0127	18.4852	15.0118	11.8668	17.5486	12.2986	0.0357868	0.869188	1.23483	0.304312	up
Tcan_03391	gnlWGS:JPKZTcan_03391_1s_mrna	Hexokinase-2 [Toxocara canis]	0.168478	0	0.351212	0	0	0	0.0357613	0.869188	1732.3	10.7585	up
Tcan_10391	gnlWGS:JPKZTcan_10391_1s_mrna	hypothetical protein Tcan_10391 [Toxocara canis]	0	0.330233	0	0.972609	0.481792	1.23945	0.0359543	0.870736	0.122588	-3.02811	down
Tcan_13185	gnlWGS:JPKZTcan_13185_1s_mrna	Retinol dehydrogenase 13 [Toxocara canis]	14.0632	13.9535	10.9812	11.621	12.4524	10.3615	0.0359173	0.870736	1.13251	0.179524	up
Tcan_15666	gnlWGS:JPKZTcan_15666_1s_mrna	Chondroadherin-like protein [Toxocara canis]	6.39848	5.96298	4.85702	7.44391	9.34749	6.14074	0.0361048	0.871945	0.750845	-0.413413	down
Tcan_11582	gnlWGS:JPKZTcan_11582_1s_mrna	hypothetical protein Tcan_11582 [Toxocara canis]	7.55812	7.53052	7.89703	5.49144	4.34832	5.75155	0.0361037	0.871945	1.47426	0.559992	up
Tcan_11708	gnlWGS:JPKZTcan_11708_1s_mrna	hypothetical protein Tcan_11708 [Toxocara canis]	26.0978	22.7308	16.0345	17.959	19.7057	17.2585	0.036275	0.874839	1.18098	0.239981	up
Tcan_07350	gnlWGS:JPKZTcan_07350_1s_mrna	hypothetical protein Tcan_07350 [Toxocara canis]	0	0	0	1.18407	0.993326	0	0.0364144	0.87698	0.000137779	-12.8254	down
Tcan_00033	gnlWGS:JPKZTcan_00033_1s_mrna	hypothetical protein Tcan_00033, partial [Toxocara canis]	0	0	0.05881	0.373985	0.364025	0.159466	0.0366103	0.877098	0.0655282	-3.93174	down
Tcan_16764	gnlWGS:JPKZTcan_16764_1s_mrna	Serpentine receptor class alpha/beta-14 [Toxocara canis]	11.5987	9.09889	4.93281	13.0304	15.5294	9.83198	0.0366216	0.877098	0.6676	-0.582944	down
Tcan_02789	gnlWGS:JPKZTcan_02789_1s_mrna	Multidrug resistance protein pgp-3 [Toxocara canis]	9.02248	7.79505	4.56118	5.93815	6.57111	4.73635	0.0365264	0.877098	1.23966	0.309945	up
Tcan_12553	gnlWGS:JPKZTcan_12553_1s_mrna	Ubiquitin carboxyl-terminal hydrolase 33 [Toxocara canis]	13.7758	11.7497	8.95191	9.87006	8.80979	8.81987	0.0364998	0.877098	1.25374	0.326235	up
Tcan_12123	gnlWGS:JPKZTcan_12123_1s_mrna	Amidophosphoribosyltransferase [Toxocara canis]	8.21955	7.85334	6.36963	7.28047	7.15452	5.35294	0.036887	0.882236	1.13415	0.181614	up
Tcan_05342	gnlWGS:JPKZTcan_05342_1s_mrna	hypothetical protein Tcan_05342 [Toxocara canis]	499.323	461.774	306.365	408.284	396.167	317.072	0.0369701	0.883006	1.13013	0.176485	up
Tcan_01189	gnlWGS:JPKZTcan_01189_1s_mrna	hypothetical protein Tcan_01189, partial [Toxocara canis]	0.185452	0.404058	0.173618	1.01636	0.850456	0.617272	0.0370289	0.883194	0.307207	-1.70272	down
Tcan_13058	gnlWGS:JPKZTcan_13058_1s_mrna	Uncharacterized protein F42A8.1, partial [Toxocara canis]	0	0	0	0	0.137912	0.062799	0.0373644	0.883681	0.00149469	-9.38594	down
Tcan_09627	gnlWGS:JPKZTcan_09627_1s_mrna	putative transporter [Toxocara canis]	0.241942	0.058154	0.147726	0.457772	0.445708	0.30712	0.0371795	0.883681	0.369917	-1.43472	down
Tcan_12823	gnlWGS:JPKZTcan_12823_1s_mrna	Mitochondrial 2-oxodicarboxylate carrier [Toxocara canis]	0.646579	0.368744	0.529356	1.29138	1.48701	0.657553	0.0374613	0.883681	0.449564	-1.1534	down
Tcan_15060	gnlWGS:JPKZTcan_15060_1s_mrna	DNA-(apurinic or apyrimidinic site) lyase 2 [Toxocara canis]	3.51476	2.00574	1.03924	4.04175	5.96558	2.42852	0.037922	0.883681	0.527487	-0.922793	down
Tcan_15845	gnlWGS:JPKZTcan_15845_1s_mrna	Piezo-type mechanosensitive ion channel component 2 [Toxocara canis]	8.07049	4.68441	3.63808	10.7995	7.6198	7.36107	0.0380006	0.883681	0.63587	-0.653196	down
Tcan_00969	gnlWGS:JPKZTcan_00969_1s_mrna	hypothetical protein Tcan_00969, partial [Toxocara canis]	4.77866	4.30612	2.83721	6.4195	6.84152	5.44384	0.0377305	0.883681	0.637374	-0.649787	down
Tcan_09069	gnlWGS:JPKZTcan_09069_1s_mrna	TWiK family of potassium channels protein 7 [Toxocara canis]	5.78591	4.95091	2.7671	8.30472	7.91287	4.70207	0.0381705	0.883681	0.645514	-0.63148	down
Tcan_01596	gnlWGS:JPKZTcan_01596_1s_mrna	hypothetical protein Tcan_01596, partial [Toxocara canis]	45.6394	37.4037	35.6665	54.0893	53.6556	55.058	0.0379687	0.883681	0.729162	-0.45569	down
Tcan_09072	gnlWGS:JPKZTcan_09072_1s_mrna	hypothetical protein Tcan_09072 [Toxocara canis]	17.616	16.6708	13.2421	19.8584	22.8184	17.1385	0.0379232	0.883681	0.794593	-0.331712	down
Tcan_07864	gnlWGS:JPKZTcan_07864_1s_mrna	Lysine histidine transporter 1 [Toxocara canis]	184.529	171.845	121.121	153.869	161.454	124.234	0.0374959	0.883681	1.08631	0.119434	up
Tcan_11458	gnlWGS:JPKZTcan_11458_1s_mrna	Coatomer subunit alpha [Toxocara canis]	57.4034	52.2609	42.1538	48.2998	48.6255	42.5705	0.0381004	0.883681	1.08833	0.122122	up
Tcan_04896	gnlWGS:JPKZTcan_04896_1s_mrna	putative helicase C28H8.3 [Toxocara canis]	22.7618	20.3429	14.5509	19.0765	19.2384	13.7812	0.0381537	0.883681	1.10672	0.146287	up
Tcan_05650	gnlWGS:JPKZTcan_05650_1s_mrna	Ras association domain-containing protein 1 [Toxocara canis]	22.5731	19.5357	13.6685	17.5078	18.4262	13.2392	0.0377102	0.883681	1.1343	0.181808	up
Tcan_11751	gnlWGS:JPKZTcan_11751_1s_mrna	5'-AMP-activated protein kinase subunit gamma-1 [Toxocara canis]	38.1284	35.0436	30.2926	30.6719	29.3951	28.9407	0.0381231	0.883681	1.16242	0.217136	up
Tcan_17334	gnlWGS:JPKZTcan_17334_1s_mrna	Dual specificity mitogen-activated protein kinase kinase 6 [Toxocara canis]	16.8711	13.6661	10.3165	13.3372	12.7455	8.78711	0.0375117	0.883681	1.17161	0.228487	up
Tcan_10115	gnlWGS:JPKZTcan_10115_1s_mrna	JmjC domain-containing protein 8 [Toxocara canis]	8.21427	7.67558	6.85872	7.29034	6.56856	5.01581	0.0373459	0.883681	1.20524	0.269321	up
Tcan_03347	gnlWGS:JPKZTcan_03347_1s_mrna	Serine/threonine-protein phosphatase 2B catalytic subunit 2 [Toxocara canis]	58.6472	60.9017	55.0991	49.1162	47.5658	47.9668	0.0379733	0.883681	1.20739	0.271896	up
Tcan_00674	gnlWGS:JPKZTcan_00674_1s_mrna	hypothetical protein Tcan_00674, partial [Toxocara canis]	10.2014	10.3093	9.44576	9.11471	8.77359	6.22068	0.0373431	0.883681	1.24254	0.313296	up
Tcan_12219	gnlWGS:JPKZTcan_12219_1s_mrna	Chloride channel protein 2 [Toxocara canis]	16.2052	12.1312	7.99787	10.3086	11.6201	7.0287	0.0374163	0.883681	1.25475	0.327395	up
Tcan_10178	gnlWGS:JPKZTcan_10178_1s_mrna	Golgi apparatus protein 1 -like protein [Toxocara canis]	38.9438	38.4106	40.5711	31.0503	30.4917	31.9694	0.0381412	0.883681	1.26108	0.334662	up
Tcan_12337	gnlWGS:JPKZTcan_12337_1s_mrna	hypothetical protein Tcan_12337 [Toxocara canis]	56.6523	45.1112	25.1251	36.5797	35.9425	24.1927	0.0380869	0.883681	1.31199	0.391752	up
Tcan_11138	gnlWGS:JPKZTcan_11138_1s_mrna	Disco-interacting protein 2 -like protein B-A [Toxocara canis]	5.79333	4.53523	6.15875	4.19752	4.64444	3.4017	0.0375134	0.883681	1.3466	0.429321	up
Tcan_01155	gnlWGS:JPKZTcan_01155_1s_mrna	hypothetical protein Tcan_01155, partial [Toxocara canis]	3.19133	5.72491	4.80578	10.6413	8.67287	6.73409	0.0383198	0.884066	0.526793	-0.924692	down
Tcan_14582	gnlWGS:JPKZTcan_14582_1s_mrna	unnamed protein product [Toxocara canis]	16.7363	16.9225	10.6827	23.5055	21.4568	16.5467	0.0383138	0.884066	0.720897	-0.472136	down
Tcan_10300	gnlWGS:JPKZTcan_10300_1s_mrna	putative 3-hydroxyacyl-CoA dehydrogenase [Toxocara canis]	16.8913	18.1373	12.5585	22.8116	20.7312	20.7987	0.0383401	0.884066	0.739602	-0.435179	down
Tcan_01102	gnlWGS:JPKZTcan_01102_1s_mrna	hypothetical protein Tcan_01102, partial [Toxocara canis]	12.6264	5.64904	3.59754	15.3496	15.1319	9.70374	0.0385146	0.88691	0.544304	-0.877516	down
Tcan_07442	gnlWGS:JPKZTcan_07442_1s_mrna	Anoctamin-7 [Toxocara canis]	4.1458	3.35675	2.53665	5.10809	5.49104	3.30471	0.0385872	0.886929	0.722045	-0.46984	down
Tcan_13193	gnlWGS:JPKZTcan_13193_1s_mrna	putative N-acetylgalactosaminyltransferase 7 [Toxocara canis]	25.643	22.8066	16.7931	18.3772	23.0003	16.3134	0.0386689	0.886929	1.1309	0.177472	up
Tcan_15641	gnlWGS:JPKZTcan_15641_1s_mrna	hypothetical protein Tcan_15641 [Toxocara canis]	5.91898	4.0688	3.26748	3.25013	2.61643	3.33339	0.0386364	0.886929	1.4408	0.526868	up
Tcan_15715	gnlWGS:JPKZTcan_15715_1s_mrna	Calmodulin [Toxocara canis]	3.43274	1.5438	1.80616	4.53496	3.83961	3.76402	0.0392207	0.891333	0.558772	-0.839669	down
Tcan_13272	gnlWGS:JPKZTcan_13272_1s_mrna	hypothetical protein Tcan_13272 [Toxocara canis]	1.15146	1.35025	1.04646	2.12812	2.72859	1.3629	0.038914	0.891333	0.570482	-0.809746	down
Tcan_17293	gnlWGS:JPKZTcan_17293_1s_mrna	hypothetical protein Tcan_17293 [Toxocara canis]	4.43632	4.86763	3.65752	7.58891	8.16468	4.3036	0.0391358	0.891333	0.646226	-0.62989	down
Tcan_07609	gnlWGS:JPKZTcan_07609_1s_mrna	Golgi-associated plant pathogenesis-related protein 1 [Toxocara canis]	33.0124	29.3981	19.8407	37.4084	42.9733	27.6548	0.0391867	0.891333	0.761328	-0.39341	down
Tcan_11416	gnlWGS:JPKZTcan_11416_1s_mrna	Cholinesterase [Toxocara canis]	8.65692	7.27237	6.25022	9.67975	10.2635	8.01779	0.0390696	0.891333	0.793229	-0.334191	down
Tcan_09832	gnlWGS:JPKZTcan_09832_1s_mrna	Early embryogenesis protein zyg-11 [Toxocara canis]	8.56367	7.50191	5.59274	7.04967	7.14979	5.09974	0.0390666	0.891333	1.12224	0.16638	up
Tcan_12076	gnlWGS:JPKZTcan_12076_1s_mrna	hypothetical protein Tcan_12076 [Toxocara canis]	55.0988	53.9371	51.9103	46.2013	48.6871	42.6497	0.0390659	0.891333	1.17019	0.226747	up
Tcan_02608	gnlWGS:JPKZTcan_02608_1s_mrna	putative WD repeat-containing protein C25H1.08c [Toxocara canis]	5.2016	4.83851	5.04856	7.11285	7.68328	6.98393	0.0393389	0.89276	0.692775	-0.529542	down
Tcan_16755	gnlWGS:JPKZTcan_16755_1s_mrna	EH domain-containing protein 1 [Toxocara canis]	127.286	115.607	97.7534	93.4196	105.726	96.3313	0.0393909	0.89276	1.15287	0.205229	up
Tcan_06260	gnlWGS:JPKZTcan_06260_1s_mrna	Tubulin alpha-3 chain [Toxocara canis]	0.238216	0	0.315223	0	0	0	0.039438	0.89276	1844.8	10.8492	up
Tcan_16301	gnlWGS:JPKZTcan_16301_1s_mrna	hypothetical protein Tcan_16301 [Toxocara canis]	8.21144	8.59173	7.23391	11.6126	13.5905	9.68993	0.0394904	0.892783	0.688879	-0.537677	down
Tcan_04038	gnlWGS:JPKZTcan_04038_1s_mrna	Octopamine receptor 1 [Toxocara canis]	16.123	11.8137	8.03889	17.3819	18.2254	13.201	0.0396766	0.895822	0.737079	-0.440108	down
Tcan_07320	gnlWGS:JPKZTcan_07320_1s_mrna	Guanine nucleotide-binding proteinalpha-13 subunit [Toxocara canis]	16.9614	14.0727	9.76039	22.2762	21.8611	13.1007	0.0399384	0.899393	0.712716	-0.488601	down
Tcan_10498	gnlWGS:JPKZTcan_10498_1s_mrna	Long-chain-fatty-acid--CoA ligase 5 [Toxocara canis]	0.531236	0.203215	0.210818	0.190363	0.151541	0.158074	0.0399256	0.899393	1.89062	0.91886	up
Tcan_15963	gnlWGS:JPKZTcan_15963_1s_mrna	Sortilin-related receptor [Toxocara canis]	0.398452	0.197861	0.149155	0.461672	0.956141	0.59302	0.0406759	0.900792	0.370726	-1.43157	down
Tcan_12399	gnlWGS:JPKZTcan_12399_1s_mrna	hypothetical protein Tcan_12399 [Toxocara canis]	1.47282	1.41677	1.09251	3.08218	2.5242	1.74029	0.0406755	0.900792	0.542028	-0.883561	down
Tcan_04944	gnlWGS:JPKZTcan_04944_1s_mrna	Gut esterase 1 [Toxocara canis]	3.30947	4.34123	3.29282	4.91665	6.7193	6.14327	0.0401876	0.900792	0.615523	-0.700116	down
Tcan_00459	gnlWGS:JPKZTcan_00459_1s_mrna	Cathepsin B-like cysteine proteinase 4, partial [Toxocara canis]	20.943	15.5936	9.63859	23.5912	26.528	17.8285	0.04059	0.900792	0.679569	-0.557309	down
Tcan_16135	gnlWGS:JPKZTcan_16135_1s_mrna	Calpain clp-1 [Toxocara canis]	129.953	119.62	108.618	159.609	159.758	152	0.0405858	0.900792	0.759898	-0.396122	down
Tcan_07331	gnlWGS:JPKZTcan_07331_1s_mrna	hypothetical protein Tcan_07331 [Toxocara canis]	36.7898	32.3998	24.5385	39.328	43.8512	35.7147	0.0402148	0.900792	0.788334	-0.34312	down
Tcan_07485	gnlWGS:JPKZTcan_07485_1s_mrna	Ligand-gated ion channel 50 [Toxocara canis]	20.7289	20.0596	16.2381	25.0594	25.8718	21.3761	0.0405734	0.900792	0.788672	-0.342503	down
Tcan_11309	gnlWGS:JPKZTcan_11309_1s_mrna	Sugar transporter SWEET1 [Toxocara canis]	62.6678	56.617	43.5483	54.7199	55.6853	42.4605	0.040548	0.900792	1.0652	0.0911288	up
Tcan_03101	gnlWGS:JPKZTcan_03101_1s_mrna	GILT-like protein C02D5.2, partial [Toxocara canis]	30.0375	28.467	21.8967	24.3772	23.7257	21.9088	0.0406505	0.900792	1.1484	0.19962	up
Tcan_11563	gnlWGS:JPKZTcan_11563_1s_mrna	Nucleosome-remodeling factor subunit [Toxocara canis]	6.60538	5.45992	5.13581	5.35594	5.2765	4.18897	0.0402694	0.900792	1.16056	0.214819	up
Tcan_16208	gnlWGS:JPKZTcan_16208_1s_mrna	PERQ amino acid-rich with GYF domain-containing protein 2 [Toxocara canis]	8.95219	6.90206	6.9224	7.41211	6.64677	5.56062	0.0403614	0.900792	1.16092	0.215267	up
Tcan_03683	gnlWGS:JPKZTcan_03683_1s_mrna	Anaphase-promoting complex subunit 1 [Toxocara canis]	7.18763	6.92918	6.75151	6.6726	4.80884	4.41027	0.0402624	0.900792	1.31316	0.39304	up
Tcan_08804	gnlWGS:JPKZTcan_08804_1s_mrna	Alanine--tRNA ligase, cytoplasmic [Toxocara canis]	28.9552	25.6963	30.4224	19.8129	19.499	23.2885	0.040239	0.900792	1.359	0.442546	up
Tcan_09784	gnlWGS:JPKZTcan_09784_1s_mrna	Tau-tubulin kinase 1 [Toxocara canis]	0	0	0	0.181505	0.290144	0	0.0407498	0.901278	0.000636066	-10.6185	down
Tcan_06749	gnlWGS:JPKZTcan_06749_1s_mrna	Importin subunit beta-1 [Toxocara canis]	6.25127	6.30894	5.66725	5.2437	5.69798	4.75783	0.0408379	0.901786	1.16102	0.215394	up
Tcan_06866	gnlWGS:JPKZTcan_06866_1s_mrna	WW domain-containing protein [Toxocara canis]	4.54413	3.95373	4.61483	4.02111	3.77094	2.58295	0.0408768	0.901786	1.26387	0.337852	up
Tcan_05030	gnlWGS:JPKZTcan_05030_1s_mrna	Protein N-terminal glutamine amidohydrolase, partial [Toxocara canis]	13.9101	18.7711	11.0916	23.8193	24.5006	16.4703	0.0410653	0.903301	0.675609	-0.565739	down
Tcan_04319	gnlWGS:JPKZTcan_04319_1s_mrna	Low-density lipoprotein receptor-related protein 1B [Toxocara canis]	7.47594	5.95448	5.03707	4.58224	6.59083	3.89245	0.0411017	0.903301	1.22581	0.293738	up
Tcan_07670	gnlWGS:JPKZTcan_07670_1s_mrna	hypothetical protein Tcan_07670 [Toxocara canis]	10.0807	11.2721	8.66512	7.55331	8.37399	7.98999	0.041011	0.903301	1.25507	0.327768	up
Tcan_02011	gnlWGS:JPKZTcan_02011_1s_mrna	hypothetical protein Tcan_02011 [Toxocara canis]	0	0	0	4.03681	0	0	0.041358	0.905385	7.43161e-05	-13.716	down
Tcan_04368	gnlWGS:JPKZTcan_04368_1s_mrna	hypothetical protein Tcan_04368 [Toxocara canis]	1.53582	1.37587	0.587455	1.96029	2.13451	1.679	0.0417041	0.905385	0.606038	-0.722519	down
Tcan_18844	gnlWGS:JPKZTcan_18844_1s_mrna	Putative RNA polymerase II subunit B1 CTD phosphatase R08D7.2 [Toxocara canis]	3.23798	2.18727	1.58165	4.77494	4.48476	2.19929	0.041771	0.905385	0.611476	-0.709631	down
Tcan_15191	gnlWGS:JPKZTcan_15191_1s_mrna	hypothetical protein Tcan_15191 [Toxocara canis]	6.45024	4.63203	3.29477	6.73813	8.60789	6.15464	0.0417485	0.905385	0.668679	-0.580615	down
Tcan_01334	gnlWGS:JPKZTcan_01334_1s_mrna	hypothetical protein Tcan_01334, partial [Toxocara canis]	6.35157	4.63374	4.15944	7.50579	8.43693	6.50675	0.0413758	0.905385	0.674614	-0.567865	down
Tcan_15956	gnlWGS:JPKZTcan_15956_1s_mrna	Polyubiquitin-A [Toxocara canis]	189.259	170.548	124.394	204.095	212.417	170.835	0.0416558	0.905385	0.824387	-0.278607	down
Tcan_08429	gnlWGS:JPKZTcan_08429_1s_mrna	Sodium-dependent neutral amino acid transporter B(0)AT1 [Toxocara canis]	70.2954	63.0582	56.4607	58.542	66.7328	49.1758	0.0415536	0.905385	1.08807	0.121771	up
Tcan_12707	gnlWGS:JPKZTcan_12707_1s_mrna	GDP-L-fucose synthase [Toxocara canis]	69.8206	73.2216	64.9641	60.3227	52.6132	56.9893	0.0415944	0.905385	1.22411	0.291728	up
Tcan_14607	gnlWGS:JPKZTcan_14607_1s_mrna	Cadherin-related hmr-1, partial [Toxocara canis]	34.3898	21.9983	24.1442	23.9737	20.6674	18.4685	0.0414186	0.905385	1.27607	0.35171	up
Tcan_12320	gnlWGS:JPKZTcan_12320_1s_mrna	Translocating chain-associated membrane protein 1 [Toxocara canis]	57.4123	69.933	62.5882	47.6672	44.5434	51.8793	0.0415573	0.905385	1.31816	0.398526	up
Tcan_02387	gnlWGS:JPKZTcan_02387_1s_mrna	unnamed protein product [Toxocara canis]	2.97789	3.56291	3.65362	2.61385	2.25489	1.20775	0.0416199	0.905385	1.67768	0.746472	up
Tcan_14372	gnlWGS:JPKZTcan_14372_1s_mrna	hypothetical protein Tcan_14372 [Toxocara canis]	5.04906	4.42717	2.74436	8.78616	6.2324	5.00442	0.0418702	0.906403	0.610328	-0.712342	down
Tcan_06571	gnlWGS:JPKZTcan_06571_1s_mrna	hypothetical protein Tcan_06571 [Toxocara canis]	0.499819	0.345352	0	0	0	0	0.0420721	0.909639	2817.24	11.4601	up
Tcan_02325	gnlWGS:JPKZTcan_02325_1s_mrna	hypothetical protein Tcan_02325, partial [Toxocara canis]	7.36048	5.60081	3.37762	4.31293	4.49646	2.48018	0.0421805	0.910846	1.44726	0.533323	up
Tcan_10102	gnlWGS:JPKZTcan_10102_1s_mrna	hypothetical protein Tcan_10102 [Toxocara canis]	0.254574	0.252621	0	0.980792	0.666343	0.56204	0.0425099	0.913459	0.229586	-2.1229	down
Tcan_11235	gnlWGS:JPKZTcan_11235_1s_mrna	hypothetical protein Tcan_11235 [Toxocara canis]	3.53838	3.56116	2.8973	5.36542	4.54866	6.14848	0.0424438	0.913459	0.622369	-0.684158	down
Tcan_03860	gnlWGS:JPKZTcan_03860_1s_mrna	Ligand-gated ion channel 50 [Toxocara canis]	33.8569	29.245	21.8785	36.9369	38.2232	29.2755	0.0425122	0.913459	0.813712	-0.29741	down
Tcan_08863	gnlWGS:JPKZTcan_08863_1s_mrna	GDP-mannose 4,6 dehydratase 1 [Toxocara canis]	158.594	163.018	141.96	123.69	121.951	131.816	0.042406	0.913459	1.22814	0.296477	up
Tcan_02651	gnlWGS:JPKZTcan_02651_1s_mrna	hypothetical protein Tcan_02651 [Toxocara canis]	0	4.19356	3.19443	0	0	0	0.0425655	0.913473	24626.6	14.5879	up
Tcan_18495	gnlWGS:JPKZTcan_18495_1s_mrna	hypothetical protein Tcan_18495 [Toxocara canis]	13.0646	11.8126	9.98391	10.8233	12.2297	8.9751	0.0427001	0.914099	1.08845	0.12228	up
Tcan_06530	gnlWGS:JPKZTcan_06530_1s_mrna	Superoxide dismutase [Cu-Zn] [Toxocara canis]	365.604	383.767	427.949	296.923	277.748	318.894	0.0426601	0.914099	1.31755	0.397861	up
Tcan_11413	gnlWGS:JPKZTcan_11413_1s_mrna	E3 ubiquitin-protein ligase TRIP12 [Toxocara canis]	34.2276	29.2881	26.7276	28.4962	27.8747	24.7256	0.0427895	0.914883	1.11279	0.154181	up
Tcan_12771	gnlWGS:JPKZTcan_12771_1s_mrna	hypothetical protein Tcan_12771, partial [Toxocara canis]	0.603684	0.697023	0.197314	1.5148	1.3229	1.05996	0.0429663	0.916403	0.384338	-1.37955	down
Tcan_06548	gnlWGS:JPKZTcan_06548_1s_mrna	Protein disulfide-isomerase A3 [Toxocara canis]	442.842	451.482	507.268	349.669	340.793	382.093	0.0429599	0.916403	1.30678	0.386015	up
Tcan_16508	gnlWGS:JPKZTcan_16508_1s_mrna	putative tyrosine-protein kinase kin-31, partial [Toxocara canis]	0	0	0	0.155609	0.152811	0	0.0434424	0.916941	0.0009727	-10.0057	down
Tcan_09857	gnlWGS:JPKZTcan_09857_1s_mrna	hypothetical protein Tcan_09857, partial [Toxocara canis]	0.266721	0.139219	0.241803	0.324297	0.715025	0.538692	0.043212	0.916941	0.41048	-1.28462	down
Tcan_18966	gnlWGS:JPKZTcan_18966_1s_mrna	Putative nudix hydrolase 7 [Toxocara canis]	2.11926	3.08787	1.82269	3.95169	3.66486	3.64431	0.043327	0.916941	0.62427	-0.679757	down
Tcan_09297	gnlWGS:JPKZTcan_09297_1s_mrna	Serine/threonine-protein kinase spk-1 [Toxocara canis]	37.4447	34.8195	28.2541	32.9621	33.7133	27.7305	0.0433992	0.916941	1.06475	0.0905086	up
Tcan_16007	gnlWGS:JPKZTcan_16007_1s_mrna	Serine/threonine-protein kinase OSR1 [Toxocara canis]	27.218	23.6829	17.7915	21.6865	23.4523	18.316	0.0434374	0.916941	1.08254	0.114419	up
Tcan_14548	gnlWGS:JPKZTcan_14548_1s_mrna	hypothetical protein Tcan_14548 [Toxocara canis]	20.1121	18.0324	12.1107	15.3619	15.6202	11.928	0.0430855	0.916941	1.17118	0.227958	up
Tcan_14660	gnlWGS:JPKZTcan_14660_1s_mrna	Mitogen-activated protein kinase kinase kinase kinase 3 [Toxocara canis]	9.83017	6.71048	6.81341	4.9078	5.01968	6.24352	0.0434674	0.916941	1.44419	0.530265	up
Tcan_10839	gnlWGS:JPKZTcan_10839_1s_mrna	TRIO and F-actin-binding protein, partial [Toxocara canis]	6.19045	7.94086	3.80723	3.6083	5.34505	2.83774	0.0432937	0.916941	1.52136	0.605366	up
Tcan_02131	gnlWGS:JPKZTcan_02131_1s_mrna	hypothetical protein Tcan_02131 [Toxocara canis]	1.33378	0.722818	0.56656	0.34798	0	0.199425	0.0431323	0.916941	4.79199	2.26062	up
Tcan_12212	gnlWGS:JPKZTcan_12212_1s_mrna	hypothetical protein Tcan_12212 [Toxocara canis]	0.43773	0.326975	0.2265	0	0	0.104107	0.043545	0.917462	9.52102	3.25112	up
Tcan_01768	gnlWGS:JPKZTcan_01768_1s_mrna	putative RNA-directed DNA polymerase from transposon X-element [Toxocara canis]	0.383133	0.35677	0.238258	0.699219	0.779468	0.496099	0.0436258	0.918048	0.495325	-1.01355	down
Tcan_18935	gnlWGS:JPKZTcan_18935_1s_mrna	Carbonic anhydrase [Toxocara canis]	13.4474	14.712	8.19479	18.0395	20.423	12.904	0.0437565	0.918568	0.707743	-0.498703	down
Tcan_05516	gnlWGS:JPKZTcan_05516_1s_mrna	hypothetical protein Tcan_05516 [Toxocara canis]	20.2768	17.1712	14.8515	14.8923	17.1988	13.5007	0.0437314	0.918568	1.14712	0.198021	up
Tcan_00153	gnlWGS:JPKZTcan_00153_1s_mrna	hypothetical protein Tcan_00153 [Toxocara canis]	2.46922	2.16416	0.831879	4.116	3.16849	2.83803	0.0438355	0.919114	0.539911	-0.889206	down
Tcan_06902	gnlWGS:JPKZTcan_06902_1s_mrna	OV-16 antigen [Toxocara canis]	465.025	361.689	270.92	509.874	512.63	374.611	0.0439927	0.92071	0.785643	-0.348055	down
Tcan_12850	gnlWGS:JPKZTcan_12850_1s_mrna	Fatty acid synthase [Toxocara canis]	51.71	43.2658	37.4713	42.1052	46.0346	35.8692	0.0440178	0.92071	1.06804	0.0949713	up
Tcan_05775	gnlWGS:JPKZTcan_05775_1s_mrna	Collectin-12 [Toxocara canis]	0	0	0	0.18046	0.166465	0.158035	0.0441159	0.921651	0.000594106	-10.717	down
Tcan_01931	gnlWGS:JPKZTcan_01931_1s_mrna	Endoplasmic reticulum-Golgi intermediate compartment protein 1 [Toxocara canis]	52.3663	54.8923	47.6517	45.4232	45.0661	42.1803	0.0442267	0.922853	1.16764	0.223595	up
Tcan_18645	gnlWGS:JPKZTcan_18645_1s_mrna	hypothetical protein Tcan_18645 [Toxocara canis]	11.1359	8.81646	6.47248	12.4993	12.8675	9.2975	0.0444155	0.923591	0.762307	-0.391555	down
Tcan_18370	gnlWGS:JPKZTcan_18370_1s_mrna	hypothetical protein Tcan_18370 [Toxocara canis]	38.8816	32.6423	23.2837	28.1577	31.7897	22.9865	0.0443284	0.923591	1.14317	0.193041	up
Tcan_03225	gnlWGS:JPKZTcan_03225_1s_mrna	Target of rapamycin -like protein [Toxocara canis]	11.186	9.62641	7.35765	9.59417	8.62621	6.23874	0.0444552	0.923591	1.15172	0.203792	up
Tcan_00164	gnlWGS:JPKZTcan_00164_1s_mrna	hypothetical protein Tcan_00164 [Toxocara canis]	2.07139	2.79597	2.50758	0.663701	1.75452	1.15672	0.0444751	0.923591	2.06295	1.04471	up
Tcan_00203	gnlWGS:JPKZTcan_00203_1s_mrna	hypothetical protein Tcan_00203 [Toxocara canis]	5.23755	4.6179	2.56057	6.23747	7.81505	4.51995	0.0445518	0.924076	0.668517	-0.580963	down
Tcan_10972	gnlWGS:JPKZTcan_10972_1s_mrna	hypothetical protein Tcan_10972 [Toxocara canis]	2.74352	2.48093	2.91331	6.00583	4.60464	3.97898	0.0449813	0.927878	0.557783	-0.842223	down
Tcan_02737	gnlWGS:JPKZTcan_02737_1s_mrna	Papilin [Toxocara canis]	16.3331	14.1044	9.93975	16.9424	18.4786	15.4811	0.0449089	0.927878	0.793235	-0.33418	down
Tcan_18195	gnlWGS:JPKZTcan_18195_1s_mrna	Ral guanine nucleotide dissociation stimulator-like 1 [Toxocara canis]	14.1253	13.0612	11.5266	11.314	11.6512	10.8673	0.0450026	0.927878	1.14426	0.194414	up
Tcan_18315	gnlWGS:JPKZTcan_18315_1s_mrna	Dolichyl-diphosphooligosaccharide--protein glycosyltransferase subunit STT3 [Toxocara canis]	23.1295	26.3947	25.373	19.396	18.8684	20.4866	0.044954	0.927878	1.27482	0.350299	up
Tcan_02322	gnlWGS:JPKZTcan_02322_1s_mrna	GTP-binding protein Di-Ras2 [Toxocara canis]	0	6.12085	0	0	0	0	0.0449964	0.927878	20402.8	14.3165	up
Tcan_14550	gnlWGS:JPKZTcan_14550_1s_mrna	Serine/threonine-protein kinase WNK1, partial [Toxocara canis]	22.6234	20.3954	14.662	18.5939	20.1256	13.9718	0.045059	0.927938	1.0947	0.130529	up
Tcan_01971	gnlWGS:JPKZTcan_01971_1s_mrna	hypothetical protein Tcan_01971 [Toxocara canis]	0	0	0	0	0	5.65721	0.0457242	0.92964	5.30297e-05	-14.2028	down
Tcan_01191	gnlWGS:JPKZTcan_01191_1s_mrna	hypothetical protein Tcan_01191, partial [Toxocara canis]	14.8826	16.0949	12.299	20.2001	21.1863	18.301	0.0455331	0.92964	0.725054	-0.463839	down
Tcan_06126	gnlWGS:JPKZTcan_06126_1s_mrna	Juxtamembrane domain-associated catenin [Toxocara canis]	16.0479	14.191	13.3683	12.4964	13.5273	11.9818	0.0456688	0.92964	1.14739	0.198359	up
Tcan_01966	gnlWGS:JPKZTcan_01966_1s_mrna	hypothetical protein Tcan_01966 [Toxocara canis]	21.1958	21.582	18.7135	17.9247	18.3437	16.5039	0.0457289	0.92964	1.16522	0.220603	up
Tcan_12482	gnlWGS:JPKZTcan_12482_1s_mrna	High mobility group protein 1.2 [Toxocara canis]	49.5762	49.9786	50.0674	39.4359	43.5267	40.2898	0.0457218	0.92964	1.21395	0.279709	up
Tcan_16984	gnlWGS:JPKZTcan_16984_1s_mrna	Membralin [Toxocara canis]	13.2071	15.265	11.7948	11.2623	10.6746	10.9245	0.0453554	0.92964	1.22536	0.293201	up
Tcan_04849	gnlWGS:JPKZTcan_04849_1s_mrna	Ectopic P granules protein 3 [Toxocara canis]	37.3082	34.3671	37.9321	27.5045	29.9491	29.9531	0.0456876	0.92964	1.25399	0.32653	up
Tcan_10684	gnlWGS:JPKZTcan_10684_1s_mrna	Calpain-D [Toxocara canis]	3.4908	2.64262	2.13102	2.75285	1.97323	1.4364	0.0454047	0.92964	1.34109	0.423404	up
Tcan_12013	gnlWGS:JPKZTcan_12013_1s_mrna	hypothetical protein Tcan_12013 [Toxocara canis]	3.93972	0	0	0	0	0	0.0457314	0.92964	13132.4	13.6808	up
Tcan_05054	gnlWGS:JPKZTcan_05054_1s_mrna	hypothetical protein Tcan_05054 [Toxocara canis]	0	0	5.47435	0	0	0	0.0457118	0.92964	18247.8	14.1554	up
Tcan_03666	gnlWGS:JPKZTcan_03666_1s_mrna	hypothetical protein Tcan_03666 [Toxocara canis]	0	4.04241	4.14379	0	0	0	0.0452079	0.92964	27287.3	14.7359	up
Tcan_11679	gnlWGS:JPKZTcan_11679_1s_mrna	hypothetical protein Tcan_11679 [Toxocara canis]	9.728	9.6575	5.32692	12.3565	12.3594	9.95696	0.0458809	0.930046	0.712731	-0.48857	down
Tcan_09092	gnlWGS:JPKZTcan_09092_1s_mrna	RRP12-like protein [Toxocara canis]	21.9184	19.3121	19.077	18.0363	18.3684	16.3258	0.0459123	0.930046	1.14369	0.193702	up
Tcan_07202	gnlWGS:JPKZTcan_07202_1s_mrna	Microtubule-associated protein RP/EB family member 3 [Toxocara canis]	47.9643	44.5427	45.1074	34.3193	37.0964	38.8225	0.0459023	0.930046	1.24834	0.320008	up
Tcan_08424	gnlWGS:JPKZTcan_08424_1s_mrna	hypothetical protein Tcan_08424 [Toxocara canis]	0.596301	0.716942	0.342263	1.30219	0.857703	1.04046	0.0460736	0.932224	0.517288	-0.95096	down
Tcan_04111	gnlWGS:JPKZTcan_04111_1s_mrna	hypothetical protein Tcan_04111 [Toxocara canis]	129.089	124.481	121.108	99.1167	105.933	105.038	0.0461353	0.932384	1.2083	0.272975	up
Tcan_09207	gnlWGS:JPKZTcan_09207_1s_mrna	ATP-dependent RNA helicase DDX1 [Toxocara canis]	20.8879	19.1644	14.1134	16.8826	18.8236	14.2419	0.0462094	0.932795	1.08444	0.116946	up
Tcan_11904	gnlWGS:JPKZTcan_11904_1s_mrna	hypothetical protein Tcan_11904 [Toxocara canis]	3.56051	3.18981	1.97066	6.43906	5.58739	2.88027	0.0465459	0.934628	0.585036	-0.773402	down
Tcan_02266	gnlWGS:JPKZTcan_02266_1s_mrna	hypothetical protein Tcan_02266 [Toxocara canis]	5.67155	5.19103	3.25168	7.34047	8.19156	7.11993	0.0463962	0.934628	0.623092	-0.682483	down
Tcan_18152	gnlWGS:JPKZTcan_18152_1s_mrna	ATP synthase mitochondrial F1 complex assembly factor 2 [Toxocara canis]	21.335	17.0888	16.0114	24.0441	26.1487	20.0767	0.0465697	0.934628	0.774664	-0.368357	down
Tcan_12378	gnlWGS:JPKZTcan_12378_1s_mrna	Fizzy-related -like protein [Toxocara canis]	12.8723	9.67985	8.85167	8.35311	9.12407	8.63004	0.0465497	0.934628	1.20288	0.266492	up
Tcan_08844	gnlWGS:JPKZTcan_08844_1s_mrna	Alanine--tRNA ligase, cytoplasmic [Toxocara canis]	15.6478	13.1412	16.3199	10.5598	10.3123	12.064	0.0465018	0.934628	1.36959	0.453739	up
Tcan_15526	gnlWGS:JPKZTcan_15526_1s_mrna	Pyruvate carboxylase 1 [Toxocara canis]	91.6416	78.6989	54.319	70.0589	76.0471	54.8451	0.0466254	0.934663	1.11798	0.160896	up
Tcan_01132	gnlWGS:JPKZTcan_01132_1s_mrna	hypothetical protein Tcan_01132, partial [Toxocara canis]	3.98985	3.38103	2.80111	5.21416	8.02216	4.04219	0.0467367	0.935814	0.588708	-0.764377	down
Tcan_05286	gnlWGS:JPKZTcan_05286_1s_mrna	Putative tyrosinase-like protein tyr-3 [Toxocara canis]	0.753823	0.545799	0.666389	0.498895	0.47717	0.341464	0.0469137	0.938274	1.4922	0.577437	up
Tcan_01244	gnlWGS:JPKZTcan_01244_1s_mrna	Craniofacial development protein 2, partial [Toxocara canis]	0	0	0	0.249874	0.31128	0.162627	0.0472371	0.940601	0.00041449	-11.2364	down
Tcan_06698	gnlWGS:JPKZTcan_06698_1s_mrna	Twitchin [Toxocara canis]	40.5789	27.9318	22.8793	45.3191	49.0159	29.9788	0.0472169	0.940601	0.735155	-0.44388	down
Tcan_08729	gnlWGS:JPKZTcan_08729_1s_mrna	Nuclear hormone receptor family member nhr-48 [Toxocara canis]	70.4674	60.821	49.8439	61.1829	62.2462	48.9501	0.047247	0.940601	1.05078	0.0714592	up
Tcan_05306	gnlWGS:JPKZTcan_05306_1s_mrna	hypothetical protein Tcan_05306 [Toxocara canis]	2.06917	2.14156	1.80328	1.65714	0.541392	0.491335	0.0471916	0.940601	2.2358	1.16079	up
Tcan_05946	gnlWGS:JPKZTcan_05946_1s_mrna	Globin-like protein 9 [Toxocara canis]	1.72081	0.961465	0.850394	2.28728	1.94447	1.64841	0.0473082	0.940738	0.600777	-0.735098	down
Tcan_01610	gnlWGS:JPKZTcan_01610_1s_mrna	hypothetical protein Tcan_01610, partial [Toxocara canis]	5.19294	6.25291	3.02998	3.4935	3.57282	2.7566	0.04738	0.941087	1.47368	0.559421	up
Tcan_09708	gnlWGS:JPKZTcan_09708_1s_mrna	Transmembrane 9 superfamily member 4 [Toxocara canis]	39.9778	43.9223	43.0473	34.9102	31.6225	34.2772	0.0474383	0.941167	1.25927	0.332593	up
Tcan_18384	gnlWGS:JPKZTcan_18384_1s_mrna	Cyclic AMP-responsive element-binding protein 3-like protein 1 [Toxocara canis]	9.94176	8.51542	5.94026	6.49255	8.07765	5.89749	0.0476436	0.943082	1.192	0.253382	up
Tcan_18763	gnlWGS:JPKZTcan_18763_1s_mrna	hypothetical protein Tcan_18763 [Toxocara canis]	0.8768	1.0894	0.632958	0.408575	0.652138	0.525042	0.0476278	0.943082	1.63907	0.712874	up
Tcan_15318	gnlWGS:JPKZTcan_15318_1s_mrna	putative E3 ubiquitin-protein ligase makorin-2 [Toxocara canis]	10.1225	9.10225	7.32806	7.85507	9.2578	6.39598	0.0478937	0.946226	1.12948	0.17566	up
Tcan_08514	gnlWGS:JPKZTcan_08514_1s_mrna	hypothetical protein Tcan_08514 [Toxocara canis]	0	4.21079	2.63489	0	0	0	0.0479115	0.946226	22818.9	14.4779	up
Tcan_13371	gnlWGS:JPKZTcan_13371_1s_mrna	Acyl-coenzyme A thioesterase 8 [Toxocara canis]	8.6989	6.06879	4.46492	9.12621	13.1432	6.6792	0.0481037	0.94837	0.664371	-0.589938	down
Tcan_12073	gnlWGS:JPKZTcan_12073_1s_mrna	26 kDa secreted antigen [Toxocara canis]	6963.88	8167.55	10429.1	5441.44	5329.29	6949.58	0.0481295	0.94837	1.44244	0.528516	up
Tcan_11210	gnlWGS:JPKZTcan_11210_1s_mrna	Cuticlin-1 [Toxocara canis]	0.156078	0	0	0.099573	0.556437	0.943015	0.0482268	0.94862	0.0976082	-3.35685	down
Tcan_03633	gnlWGS:JPKZTcan_03633_1s_mrna	hypothetical protein Tcan_03633 [Toxocara canis]	3.17074	2.22092	1.89065	4.12202	5.32047	2.64161	0.0483367	0.94862	0.602635	-0.730644	down
Tcan_15365	gnlWGS:JPKZTcan_15365_1s_mrna	Gut esterase 1 [Toxocara canis]	5.53341	4.37084	3.58939	5.81126	7.11636	5.28871	0.048361	0.94862	0.740744	-0.432954	down
Tcan_03798	gnlWGS:JPKZTcan_03798_1s_mrna	GTP-binding protein YPT6 [Toxocara canis]	10.6828	9.762	9.25378	9.65607	5.2701	4.79336	0.0483279	0.94862	1.50605	0.59077	up
Tcan_16664	gnlWGS:JPKZTcan_16664_1s_mrna	Cuticle collagen sqt-1 [Toxocara canis]	0.555998	0.854524	0.271602	1.6637	0.7303	1.6482	0.0484533	0.949356	0.41614	-1.26486	down
Tcan_14278	gnlWGS:JPKZTcan_14278_1s_mrna	Acetylcholine receptor-like protein cup-4 [Toxocara canis]	4.51674	3.18886	2.33285	2.91165	2.67827	2.14403	0.0486698	0.951641	1.29797	0.376259	up
Tcan_17118	gnlWGS:JPKZTcan_17118_1s_mrna	Importin subunit alpha-3 [Toxocara canis]	28.3368	25.719	35.0281	19.7062	20.6491	24.0904	0.0486797	0.951641	1.38231	0.467079	up
Tcan_09252	gnlWGS:JPKZTcan_09252_1s_mrna	INO80 complex subunit D [Toxocara canis]	11.1038	8.95146	7.92834	8.79135	8.54883	7.51508	0.0487523	0.951988	1.12586	0.171032	up
Tcan_11016	gnlWGS:JPKZTcan_11016_1s_mrna	Vesicle-associated membrane protein 1 [Toxocara canis]	0	0	0	0.456656	0.744726	0	0.0489785	0.953183	0.000249712	-11.9674	down
Tcan_13253	gnlWGS:JPKZTcan_13253_1s_mrna	hypothetical protein Tcan_13253 [Toxocara canis]	235.463	200.244	164.79	250.033	261.879	213.599	0.0488965	0.953183	0.827687	-0.272843	down
Tcan_14578	gnlWGS:JPKZTcan_14578_1s_mrna	hypothetical protein Tcan_14578 [Toxocara canis]	10.9454	9.38313	8.37255	8.33489	9.51123	7.92213	0.0489761	0.953183	1.11382	0.155511	up
Tcan_03723	gnlWGS:JPKZTcan_03723_1s_mrna	hypothetical protein Tcan_03723 [Toxocara canis]	0.212398	0.215733	0	0	0	0	0.0490544	0.953591	1427.1	10.4789	up
Tcan_17091	gnlWGS:JPKZTcan_17091_1s_mrna	5'-3' exoribonuclease 2 -like protein [Toxocara canis]	29.3408	27.0942	21.4219	25.2919	26.7786	21.0958	0.0492541	0.956401	1.06411	0.0896462	up
Tcan_11116	gnlWGS:JPKZTcan_11116_1s_mrna	IgGFc-binding protein [Toxocara canis]	0.377056	0.366344	0.282731	0.200369	0.097665	0.22845	0.049325	0.956706	1.94903	0.962753	up
Tcan_02728	gnlWGS:JPKZTcan_02728_1s_mrna	COMM domain-containing protein 10 [Toxocara canis]	14.3837	11.3278	11.4011	17.9802	19.8639	13.1376	0.0497204	0.963298	0.727961	-0.458068	down
Tcan_00730	gnlWGS:JPKZTcan_00730_1s_mrna	hypothetical protein Tcan_00730, partial [Toxocara canis]	0.680546	0.671802	1.31274	2.45058	2.44768	1.93449	0.0499483	0.965466	0.390046	-1.35828	down
Tcan_03263	gnlWGS:JPKZTcan_03263_1s_mrna	hypothetical protein Tcan_03263 [Toxocara canis]	3.12111	2.99384	1.59108	3.87113	4.12731	3.41892	0.0499993	0.965466	0.67494	-0.567168	down
Tcan_06990	gnlWGS:JPKZTcan_06990_1s_mrna	Transthyretin-like protein 15 [Toxocara canis]	230.803	212.413	154.785	266.44	249.101	232.5	0.0499345	0.965466	0.799424	-0.322967	down
Tcan_07960	gnlWGS:JPKZTcan_07960_1s_mrna	unnamed protein product [Toxocara canis]	6.25317	3.91195	3.08438	8.96736	7.11474	5.78262	0.0501154	0.965751	0.605976	-0.722667	down
Tcan_15429	gnlWGS:JPKZTcan_15429_1s_mrna	hypothetical protein Tcan_15429 [Toxocara canis]	1.52067	1.12162	0.828268	1.70832	2.04149	1.58249	0.0501255	0.965751	0.650857	-0.619588	down
Tcan_00498	gnlWGS:JPKZTcan_00498_1s_mrna	hypothetical protein Tcan_00498, partial [Toxocara canis]	4.06008	3.71151	2.87579	4.92868	7.73683	4.56588	0.0502843	0.967735	0.617906	-0.69454	down
Tcan_11306	gnlWGS:JPKZTcan_11306_1s_mrna	Acid-sensing ion channel 1 [Toxocara canis]	0.73381	0.429772	0.278731	1.09432	1.37135	0.456914	0.0503784	0.968472	0.493506	-1.01886	down
Tcan_00347	gnlWGS:JPKZTcan_00347_1s_mrna	hypothetical protein Tcan_00347 [Toxocara canis]	0.177009	0.258016	0.352703	0.686027	1.04262	0.743757	0.0504433	0.968646	0.318609	-1.65014	down
Tcan_03345	gnlWGS:JPKZTcan_03345_1s_mrna	Casein kinase I isoform delta [Toxocara canis]	40.3471	37.641	38.2183	28.9179	29.7644	33.3007	0.0505086	0.968827	1.26335	0.33725	up
Tcan_11974	gnlWGS:JPKZTcan_11974_1s_mrna	Cuticle collagen dpy-5 [Toxocara canis]	1.92925	1.6278	2.08696	2.72719	3.62507	3.0031	0.0506532	0.970526	0.603292	-0.729071	down
Tcan_12559	gnlWGS:JPKZTcan_12559_1s_mrna	Uncharacterized protein Tcan_12559 [Toxocara canis]	6.48628	6.4436	5.68781	7.96436	9.31662	7.34598	0.0507936	0.972142	0.755988	-0.403564	down
Tcan_10357	gnlWGS:JPKZTcan_10357_1s_mrna	putative RNA-dependent RNA polymerase 1 [Toxocara canis]	3.51847	2.59471	1.6194	4.47366	3.97537	2.8046	0.0511106	0.97391	0.687119	-0.541367	down
Tcan_02984	gnlWGS:JPKZTcan_02984_1s_mrna	Protein neuralized [Toxocara canis]	28.9651	26.7218	18.3774	22.7403	25.5315	15.6272	0.0510268	0.97391	1.15908	0.212984	up
Tcan_14884	gnlWGS:JPKZTcan_14884_1s_mrna	Small heat shock protein OV25-1 [Toxocara canis]	1.86075	2.32123	3.15802	1.35034	1.34944	1.51875	0.0510681	0.97391	1.73994	0.799042	up
Tcan_13973	gnlWGS:JPKZTcan_13973_1s_mrna	hypothetical protein Tcan_13973 [Toxocara canis]	0.12581	0.270416	1.15416	0.141198	0.182543	0.017125	0.0510762	0.97391	4.54838	2.18535	up
Tcan_17537	gnlWGS:JPKZTcan_17537_1s_mrna	WD repeat-containing protein 89 [Toxocara canis]	12.7462	11.4802	8.22275	13.906	17.4441	11.4669	0.0512141	0.974769	0.757854	-0.400007	down
Tcan_17690	gnlWGS:JPKZTcan_17690_1s_mrna	RalBP1-associated Eps domain-containing protein 1 [Toxocara canis]	9.67001	8.79936	6.60905	6.71216	8.49761	6.64021	0.0512681	0.974769	1.14775	0.198813	up
Tcan_02750	gnlWGS:JPKZTcan_02750_1s_mrna	Transmembrane protein -like protein [Toxocara canis]	4.00111	3.3181	3.254	5.01041	4.77144	5.26696	0.0513841	0.974836	0.702595	-0.509236	down
Tcan_15014	gnlWGS:JPKZTcan_15014_1s_mrna	Exonuclease 3'-5' domain-containing protein 1 [Toxocara canis]	142.363	128.394	94.6678	120.635	128.678	93.3387	0.0513655	0.974836	1.06646	0.0928343	up
Tcan_05288	gnlWGS:JPKZTcan_05288_1s_mrna	3'(2'),5'-bisphosphate nucleotidase 1 [Toxocara canis]	300.021	287.067	236.813	271.383	275.431	226.425	0.0515127	0.975849	1.06552	0.0915553	up
Tcan_09596	gnlWGS:JPKZTcan_09596_1s_mrna	hypothetical protein Tcan_09596 [Toxocara canis]	1.81481	1.12405	1.53655	0.680605	0.908693	0.97416	0.0516063	0.975849	1.74585	0.803926	up
Tcan_12988	gnlWGS:JPKZTcan_12988_1s_mrna	hypothetical protein Tcan_12988 [Toxocara canis]	0	3.43121	0	0	0	0	0.051602	0.975849	11437.4	13.4815	up
Tcan_03897	gnlWGS:JPKZTcan_03897_1s_mrna	Arf-GAP with SH3 domain, ANK repeat and PH domain-containing protein 1 [Toxocara canis]	7.90155	6.73106	5.47948	6.39027	6.10089	5.53515	0.0517599	0.977687	1.11571	0.15796	up
Tcan_07449	gnlWGS:JPKZTcan_07449_1s_mrna	JmjC domain-containing protein 4 [Toxocara canis]	4.61112	5.27387	2.87063	6.74525	6.87619	4.63523	0.052279	0.978962	0.698683	-0.517291	down
Tcan_14651	gnlWGS:JPKZTcan_14651_1s_mrna	Sugar phosphate exchanger 3 [Toxocara canis]	7.36461	9.02323	5.88107	10.7842	12.5846	7.82425	0.0522216	0.978962	0.713904	-0.486198	down
Tcan_08208	gnlWGS:JPKZTcan_08208_1s_mrna	unnamed protein product [Toxocara canis]	4.88559	3.92668	3.67409	5.34327	6.71876	5.27455	0.0519212	0.978962	0.720232	-0.473465	down
Tcan_06913	gnlWGS:JPKZTcan_06913_1s_mrna	Alkylglycerol monooxygenase -like protein [Toxocara canis]	22.8332	18.3633	12.6785	26.6934	28.2792	17.4555	0.0522103	0.978962	0.743841	-0.426934	down
Tcan_01726	gnlWGS:JPKZTcan_01726_1s_mrna	26 kDa secreted antigen [Toxocara canis]	83.6194	76.159	67.9655	97.605	102.335	92.8878	0.0522463	0.978962	0.777741	-0.362638	down
Tcan_07770	gnlWGS:JPKZTcan_07770_1s_mrna	Guanylate cyclase receptor-type gcy-1 [Toxocara canis]	5.93137	5.29639	3.70896	6.83437	6.65155	5.59361	0.0520451	0.978962	0.782866	-0.353162	down
Tcan_06576	gnlWGS:JPKZTcan_06576_1s_mrna	Putative aminopeptidase W07G4.4, partial [Toxocara canis]	30.9745	28.0324	23.5937	25.997	27.5033	22.6326	0.0522314	0.978962	1.08495	0.117631	up
Tcan_16981	gnlWGS:JPKZTcan_16981_1s_mrna	Pyruvate kinase PKM [Toxocara canis]	0.690265	0.670223	0.586323	0.54121	0.392124	0.374998	0.0520381	0.978962	1.48801	0.573384	up
Tcan_13373	gnlWGS:JPKZTcan_13373_1s_mrna	hypothetical protein Tcan_13373 [Toxocara canis]	0	0	0	0.449474	0.34145	0	0.052424	0.979219	0.000379303	-11.3644	down
Tcan_04456	gnlWGS:JPKZTcan_04456_1s_mrna	hypothetical protein Tcan_04456 [Toxocara canis]	3.95627	3.27617	2.95978	5.63936	5.67295	3.39834	0.0523878	0.979219	0.692847	-0.529392	down
Tcan_04287	gnlWGS:JPKZTcan_04287_1s_mrna	Phosphorylase b kinase gamma catalytic chain, liver/testis isoform, partial [Toxocara canis]	13.8444	14.8386	12.8771	11.3231	10.2727	11.6635	0.0524622	0.979219	1.24958	0.321443	up
Tcan_10850	gnlWGS:JPKZTcan_10850_1s_mrna	Ephrin type-B receptor 1 [Toxocara canis]	23.8739	23.5443	19.6484	30.2455	29.2978	26.0262	0.0526825	0.981338	0.783767	-0.351504	down
Tcan_17214	gnlWGS:JPKZTcan_17214_1s_mrna	Acyl-CoA desaturase [Toxocara canis]	191.492	173.125	127.379	207.816	222.143	164.089	0.0526889	0.981338	0.828211	-0.271929	down
Tcan_18863	gnlWGS:JPKZTcan_18863_1s_mrna	putative protein phosphatase 2C T23F11.1 [Toxocara canis]	16.5751	16.6096	17.2757	13.6416	13.6806	13.593	0.0527978	0.982312	1.23329	0.302517	up
Tcan_13774	gnlWGS:JPKZTcan_13774_1s_mrna	Solute carrier family 22 member 16 [Toxocara canis]	3.73036	2.7989	1.94721	4.45639	4.1799	3.10139	0.0529009	0.983173	0.722159	-0.469612	down
Tcan_08745	gnlWGS:JPKZTcan_08745_1s_mrna	26S proteasome non-ATPase regulatory subunit 2 [Toxocara canis]	12.4617	12.8856	12.7629	10.1792	9.75496	10.4107	0.0531608	0.986127	1.2559	0.328725	up
Tcan_07657	gnlWGS:JPKZTcan_07657_1s_mrna	Chromodomain-helicase-DNA-binding protein 2 [Toxocara canis]	0.27296	0.671171	1.18343	0	0.317	0	0.0531735	0.986127	6.71155	2.74665	up
Tcan_06193	gnlWGS:JPKZTcan_06193_1s_mrna	Golgi reassembly-stacking protein 2 [Toxocara canis]	46.1006	46.5325	52.1621	35.2612	36.0889	40.357	0.0533186	0.987762	1.2962	0.374292	up
Tcan_11737	gnlWGS:JPKZTcan_11737_1s_mrna	Abnormal pharyngeal pumping eat-20 [Toxocara canis]	68.7484	67.5841	49.122	60.5688	63.6009	49.7162	0.0534129	0.988452	1.06653	0.0929246	up
Tcan_02575	gnlWGS:JPKZTcan_02575_1s_mrna	hypothetical protein Tcan_02575 [Toxocara canis]	15.5533	13.8438	14.4999	11.9302	10.9705	11.3483	0.0535509	0.98995	1.2817	0.358061	up
Tcan_08333	gnlWGS:JPKZTcan_08333_1s_mrna	Histone-lysine N-methyltransferase, H3 lysine-79 specific [Toxocara canis]	12.5333	10.6789	9.25819	11.1037	10.7556	8.47047	0.0536978	0.991043	1.07058	0.0983871	up
Tcan_13706	gnlWGS:JPKZTcan_13706_1s_mrna	Rab GTPase-activating protein 1-like [Toxocara canis]	10.5271	9.85174	7.03818	7.94959	9.80141	5.73054	0.0537244	0.991043	1.1676	0.223545	up
Tcan_16631	gnlWGS:JPKZTcan_16631_1s_mrna	Ligand-gated ion channel 50 [Toxocara canis]	3.55004	3.35036	2.52605	4.26062	5.76385	3.30859	0.0538783	0.991772	0.706998	-0.500222	down
Tcan_07150	gnlWGS:JPKZTcan_07150_1s_mrna	Zinc transporter ZIP12 [Toxocara canis]	4.49867	3.70037	3.05243	2.91308	3.6346	2.69429	0.0538679	0.991772	1.21743	0.283842	up
Tcan_14761	gnlWGS:JPKZTcan_14761_1s_mrna	hypothetical protein Tcan_14761 [Toxocara canis]	1.58041	1.78961	0.641721	2.48234	2.64602	1.8827	0.0540873	0.992459	0.572201	-0.805406	down
Tcan_04649	gnlWGS:JPKZTcan_04649_1s_mrna	hypothetical protein Tcan_04649 [Toxocara canis]	9.29586	7.65943	6.51516	9.55339	11.5303	8.81778	0.0539745	0.992459	0.784928	-0.349369	down
Tcan_09041	gnlWGS:JPKZTcan_09041_1s_mrna	hypothetical protein Tcan_09041 [Toxocara canis]	6.46042	3.72364	3.22379	3.76975	4.0983	2.19304	0.0540757	0.992459	1.33264	0.414292	up
Tcan_02509	gnlWGS:JPKZTcan_02509_1s_mrna	unnamed protein product [Toxocara canis]	7.26172	4.28635	5.38725	4.98993	4.15515	1.59005	0.054163	0.992797	1.57756	0.657696	up
Tcan_01538	gnlWGS:JPKZTcan_01538_1s_mrna	hypothetical protein Tcan_01538, partial [Toxocara canis]	0	0	0	2.61684	0	2.64826	0.0542778	0.99385	5.6979e-05	-14.0992	down
Tcan_06250	gnlWGS:JPKZTcan_06250_1s_mrna	Protein tweety -like protein 1 [Toxocara canis]	37.9131	31.0047	25.3383	31.4059	31.7517	24.4982	0.054361	0.994324	1.0753	0.104738	up
Tcan_12202	gnlWGS:JPKZTcan_12202_1s_mrna	Serine/threonine-protein kinase pink-1, mitochondrial [Toxocara canis]	10.6786	10.7635	7.34472	12.6985	13.5649	10.132	0.0544426	0.994767	0.790946	-0.338349	down
Tcan_12544	gnlWGS:JPKZTcan_12544_1s_mrna	Major facilitator superfamily domain-containing protein 12 [Toxocara canis]	4.52124	4.40209	3.31137	5.38659	5.78841	4.80033	0.054723	0.996741	0.76585	-0.384867	down
Tcan_12466	gnlWGS:JPKZTcan_12466_1s_mrna	TWiK family of potassium channels protein 7 [Toxocara canis]	10.1874	9.64285	7.97607	11.9791	12.3564	10.3087	0.0546676	0.996741	0.802628	-0.317196	down
Tcan_07105	gnlWGS:JPKZTcan_07105_1s_mrna	putative GMP synthase [glutamine-hydrolyzing] [Toxocara canis]	10.6671	7.63014	7.72567	7.22228	8.4253	6.366	0.0546193	0.996741	1.18213	0.241388	up
Tcan_05203	gnlWGS:JPKZTcan_05203_1s_mrna	hypothetical protein Tcan_05203 [Toxocara canis]	0.273163	0.091704	0	0.394848	0.672328	0.855777	0.0550044	0.997842	0.189743	-2.39788	down
Tcan_12841	gnlWGS:JPKZTcan_12841_1s_mrna	hypothetical protein Tcan_12841 [Toxocara canis]	3.10949	2.10603	1.07324	3.84861	7.75099	1.81794	0.0548549	0.997842	0.468697	-1.09327	down
Tcan_08875	gnlWGS:JPKZTcan_08875_1s_mrna	Phthiotriol/phenolphthiotriol dimycocerosates methyltransferase [Toxocara canis]	3.29551	2.69217	3.27169	4.95484	5.11035	4.10243	0.0550489	0.997842	0.653559	-0.613611	down
Tcan_08940	gnlWGS:JPKZTcan_08940_1s_mrna	hypothetical protein Tcan_08940 [Toxocara canis]	25.9753	19.2789	13.4493	27.3811	28.3754	21.8259	0.0548987	0.997842	0.75666	-0.402282	down
Tcan_11202	gnlWGS:JPKZTcan_11202_1s_mrna	Single-stranded DNA-binding protein 3 [Toxocara canis]	22.6876	20.977	23.5827	17.7588	18.3649	18.2201	0.0550712	0.997842	1.23744	0.307362	up
Tcan_07909	gnlWGS:JPKZTcan_07909_1s_mrna	putative phosphorylase b kinase regulatory subunit alpha [Toxocara canis]	4.9823	4.24935	2.66088	5.88595	8.96118	4.49076	0.0552802	0.998544	0.614986	-0.701375	down
Tcan_14572	gnlWGS:JPKZTcan_14572_1s_mrna	Uncharacterized protein F44B9.2 [Toxocara canis]	5.30535	3.6611	2.91902	5.51211	6.9384	4.39638	0.0552827	0.998544	0.7055	-0.503283	down
Tcan_02411	gnlWGS:JPKZTcan_02411_1s_mrna	Translocating chain-associated membrane protein 1-like 1, partial [Toxocara canis]	103.267	112.677	111.736	85.843	77.3018	92.0705	0.0552252	0.998544	1.28394	0.360576	up
Tcan_07876	gnlWGS:JPKZTcan_07876_1s_mrna	Tau-tubulin kinase 1 [Toxocara canis]	1.52771	1.13893	1.08707	2.08282	2.96471	1.35674	0.0553928	0.999491	0.586125	-0.770719	down
Tcan_18970	gnlWGS:JPKZTcan_18970_1s_mrna	hypothetical protein Tcan_18970 [Toxocara canis]	0	0	0	0	3.02075	0	0.111975	0.999592	9.93132e-05	-13.2977	down
Tcan_02300	gnlWGS:JPKZTcan_02300_1s_mrna	hypothetical protein Tcan_02300 [Toxocara canis]	0	0	0	2.5614	0	0	0.111613	0.999592	0.000117123	-13.0597	down
Tcan_07483	gnlWGS:JPKZTcan_07483_1s_mrna	hypothetical protein Tcan_07483 [Toxocara canis]	0	0	0	0	0	2.55308	0.131065	0.999592	0.000117505	-13.055	down
Tcan_08949	gnlWGS:JPKZTcan_08949_1s_mrna	hypothetical protein Tcan_08949 [Toxocara canis]	0	0	0	0	2.2725	0	0.187938	0.999592	0.000132013	-12.887	down
Tcan_02275	gnlWGS:JPKZTcan_02275_1s_mrna	hypothetical protein Tcan_02275 [Toxocara canis]	0	0	0	0	2.13675	0	0.122074	0.999592	0.0001404	-12.7982	down
Tcan_08481	gnlWGS:JPKZTcan_08481_1s_mrna	hypothetical protein Tcan_08481 [Toxocara canis]	0	0	0	0	0	1.83624	0.117146	0.999592	0.000163377	-12.5795	down
Tcan_12443	gnlWGS:JPKZTcan_12443_1s_mrna	hypothetical protein Tcan_12443 [Toxocara canis]	0	0	0	1.77612	0	0	0.122014	0.999592	0.000168907	-12.5315	down
Tcan_00416	gnlWGS:JPKZTcan_00416_1s_mrna	hypothetical protein Tcan_00416, partial [Toxocara canis]	0	0	0	1.6452	0	0	0.2258	0.999592	0.000182348	-12.421	down
Tcan_07902	gnlWGS:JPKZTcan_07902_1s_mrna	hypothetical protein Tcan_00494, partial [Toxocara canis]	0	0	0	0	0.767564	0.558797	0.106446	0.999592	0.000226183	-12.1102	down
Tcan_05523	gnlWGS:JPKZTcan_05523_1s_mrna	hypothetical protein Tcan_05523 [Toxocara canis]	0	0	0	0.781476	0	0.51411	0.103654	0.999592	0.000231555	-12.0764	down
Tcan_05963	gnlWGS:JPKZTcan_05963_1s_mrna	hypothetical protein Tcan_05963 [Toxocara canis]	0	0	0	0	1.18164	0	0.178725	0.999592	0.000253884	-11.9435	down
Tcan_02206	gnlWGS:JPKZTcan_02206_1s_mrna	hypothetical protein Tcan_02206 [Toxocara canis]	0	0	0	0.99829	0.148325	0	0.148978	0.999592	0.00026164	-11.9001	down
Tcan_09742	gnlWGS:JPKZTcan_09742_1s_mrna	hypothetical protein Tcan_09742 [Toxocara canis]	0	0	0	0	0	0.995539	0.195303	0.999592	0.000301344	-11.6963	down
Tcan_01215	gnlWGS:JPKZTcan_01215_1s_mrna	hypothetical protein Tcan_01215, partial [Toxocara canis]	0	0	0	0.563149	0	0.42207	0.115419	0.999592	0.000304501	-11.6813	down
Tcan_18361	gnlWGS:JPKZTcan_18361_1s_mrna	hypothetical protein Tcan_18361 [Toxocara canis]	0	0	0	0.589825	0.389693	0	0.15268	0.999592	0.000306273	-11.6729	down
Tcan_08564	gnlWGS:JPKZTcan_08564_1s_mrna	Basic helix-loop-helix neural transcription factor TAP [Toxocara canis]	0	0	0	0	0.964433	0	0.178725	0.999592	0.000311064	-11.6505	down
Tcan_06011	gnlWGS:JPKZTcan_06011_1s_mrna	hypothetical protein Tcan_06011 [Toxocara canis]	0	0	0	0	0.96442	0	0.240337	0.999592	0.000311068	-11.6505	down
Tcan_06688	gnlWGS:JPKZTcan_06688_1s_mrna	hypothetical protein Tcan_06688 [Toxocara canis]	0	0	0	0	0.934264	0	0.262361	0.999592	0.000321108	-11.6047	down
Tcan_07908	gnlWGS:JPKZTcan_07908_1s_mrna	hypothetical protein Tcan_07908, partial [Toxocara canis]	0	0	0	0.917577	0	0	0.318947	0.999592	0.000326948	-11.5787	down
Tcan_00187	gnlWGS:JPKZTcan_00187_1s_mrna	hypothetical protein Tcan_00187 [Toxocara canis]	0	0	0	0	0.849724	0	0.230846	0.999592	0.000353056	-11.4678	down
Tcan_11727	gnlWGS:JPKZTcan_11727_1s_mrna	hypothetical protein Tcan_11727 [Toxocara canis]	0	0	0	0.523542	0.318211	0	0.0869504	0.999592	0.000356399	-11.4542	down
Tcan_10931	gnlWGS:JPKZTcan_10931_1s_mrna	hypothetical protein Tcan_10931 [Toxocara canis]	0	0	0	0	0	0.841249	0.235054	0.999592	0.000356613	-11.4534	down
Tcan_00076	gnlWGS:JPKZTcan_00076_1s_mrna	hypothetical protein Tcan_00076 [Toxocara canis]	0	0	0	0	0.834958	0	0.222179	0.999592	0.0003593	-11.4425	down
Tcan_14223	gnlWGS:JPKZTcan_14223_1s_mrna	putative serine/threonine-protein kinase [Toxocara canis]	0	0	0	0.445351	0.364885	0	0.0576035	0.999592	0.000370262	-11.3992	down
Tcan_00090	gnlWGS:JPKZTcan_00090_1s_mrna	Meiotic recombination protein DMC1/LIM15 -like protein, partial [Toxocara canis]	0	0	0	0.540064	0.262762	0	0.10972	0.999592	0.00037368	-11.3859	down
Tcan_12604	gnlWGS:JPKZTcan_12604_1s_mrna	Hemoglobin and hemoglobin-haptoglobin-binding protein A, partial [Toxocara canis]	0	0	0	0.206213	0.552821	0	0.127163	0.999592	0.000395239	-11.305	down
Tcan_17912	gnlWGS:JPKZTcan_17912_1s_mrna	hypothetical protein Tcan_17912 [Toxocara canis]	0	0	0	0	0.735758	0	0.347334	0.999592	0.000407743	-11.2601	down
Tcan_05518	gnlWGS:JPKZTcan_05518_1s_mrna	hypothetical protein Tcan_05518 [Toxocara canis]	0	0	0	0.290712	0.271054	0.165853	0.104244	0.999592	0.000412304	-11.244	down
Tcan_12975	gnlWGS:JPKZTcan_12975_1s_mrna	hypothetical protein Tcan_12975 [Toxocara canis]	0	0	0	0.724745	0	0	0.30022	0.999592	0.000413939	-11.2383	down
Tcan_12686	gnlWGS:JPKZTcan_12686_1s_mrna	hypothetical protein Tcan_12686 [Toxocara canis]	0	0	0	0.465156	0.250669	0	0.136141	0.999592	0.000419097	-11.2204	down
Tcan_02458	gnlWGS:JPKZTcan_02458_1s_mrna	hypothetical protein Tcan_02458 [Toxocara canis]	0	0	0	0.526845	0	0.183525	0.124668	0.999592	0.000422315	-11.2094	down
Tcan_06314	gnlWGS:JPKZTcan_06314_1s_mrna	BTB and MATH domain-containing protein 42 [Toxocara canis]	0	0	0	0	0.702021	0	0.289802	0.999592	0.000427338	-11.1923	down
Tcan_11447	gnlWGS:JPKZTcan_11447_1s_mrna	hypothetical protein Tcan_11447 [Toxocara canis]	0	0	0	0.189139	0	0.500545	0.109495	0.999592	0.000434982	-11.1668	down
Tcan_16083	gnlWGS:JPKZTcan_16083_1s_mrna	hypothetical protein Tcan_16083 [Toxocara canis]	0	0	0	0	0.410261	0.271083	0.106446	0.999592	0.000440306	-11.1492	down
Tcan_14638	gnlWGS:JPKZTcan_14638_1s_mrna	hypothetical protein Tcan_14638 [Toxocara canis]	0	0	0	0.557263	0	0.12352	0.173696	0.999592	0.000440669	-11.148	down
Tcan_04632	gnlWGS:JPKZTcan_04632_1s_mrna	hypothetical protein Tcan_04632 [Toxocara canis]	0	0	0	0	0.552292	0.12718	0.199718	0.999592	0.000441519	-11.1452	down
Tcan_03405	gnlWGS:JPKZTcan_03405_1s_mrna	Ligand-gated ion channel 50 [Toxocara canis]	0	0	0	0	0.238191	0.436585	0.142783	0.999592	0.000444592	-11.1352	down
Tcan_10198	gnlWGS:JPKZTcan_10198_1s_mrna	hypothetical protein Tcan_10198 [Toxocara canis]	0	0	0	0	0.671389	0	0.347334	0.999592	0.000446835	-11.128	down
Tcan_13705	gnlWGS:JPKZTcan_13705_1s_mrna	hypothetical protein Tcan_13705 [Toxocara canis]	0	0	0	0.669472	0	0	0.202219	0.999592	0.000448114	-11.1238	down
Tcan_09789	gnlWGS:JPKZTcan_09789_1s_mrna	hypothetical protein Tcan_09789 [Toxocara canis]	0	0	0	0.656035	0	0	0.28393	0.999592	0.000457293	-11.0946	down
Tcan_11023	gnlWGS:JPKZTcan_11023_1s_mrna	hypothetical protein Tcan_11023 [Toxocara canis]	0	0	0	0	0.65009	0	0.325256	0.999592	0.000461475	-11.0815	down
Tcan_18207	gnlWGS:JPKZTcan_18207_1s_mrna	hypothetical protein Tcan_18207 [Toxocara canis]	0	0	0	0.206183	0.443292	0	0.137946	0.999592	0.000461912	-11.0801	down
Tcan_02320	gnlWGS:JPKZTcan_02320_1s_mrna	hypothetical protein Tcan_02320 [Toxocara canis]	0	0	0	0.45112	0.197844	0	0.255287	0.999592	0.000462275	-11.079	down
Tcan_16742	gnlWGS:JPKZTcan_16742_1s_mrna	hypothetical protein Tcan_16742 [Toxocara canis]	0	0	0	0.612576	0	0	0.235149	0.999592	0.000489735	-10.9957	down
Tcan_12346	gnlWGS:JPKZTcan_12346_1s_mrna	Multidrug resistance protein 1 [Toxocara canis]	0	0	0	0.275285	0.334861	0	0.120572	0.999592	0.000491686	-10.99	down
Tcan_04521	gnlWGS:JPKZTcan_04521_1s_mrna	hypothetical protein Tcan_04521 [Toxocara canis]	0	0	0	0.139383	0	0.468003	0.288611	0.999592	0.00049392	-10.9834	down
Tcan_13897	gnlWGS:JPKZTcan_13897_1s_mrna	hypothetical protein Tcan_13897 [Toxocara canis]	0	0	0	0.605714	0	0	0.245446	0.999592	0.000495283	-10.9795	down
Tcan_07231	gnlWGS:JPKZTcan_07231_1s_mrna	hypothetical protein Tcan_07231 [Toxocara canis]	0	0	0	0	0.594859	0	0.289802	0.999592	0.000504321	-10.9534	down
Tcan_09105	gnlWGS:JPKZTcan_09105_1s_mrna	Alpha/beta hydrolase domain-containing protein 17A [Toxocara canis]	0	0	0	0	0.583324	0	0.306302	0.999592	0.000514294	-10.9251	down
Tcan_02375	gnlWGS:JPKZTcan_02375_1s_mrna	Serine/threonine-protein phosphatase 4 catalytic subunit [Toxocara canis]	0	0	0	0	0	0.569506	0.300532	0.999592	0.000526772	-10.8905	down
Tcan_17646	gnlWGS:JPKZTcan_17646_1s_mrna	hypothetical protein Tcan_17646 [Toxocara canis]	0	0	0	0.275713	0.257322	0.029596	0.10098	0.999592	0.000533209	-10.873	down
Tcan_16543	gnlWGS:JPKZTcan_16543_1s_mrna	hypothetical protein Tcan_16543 [Toxocara canis]	0	0	0	0.555283	0	0	0.30022	0.999592	0.000540265	-10.854	down
Tcan_09811	gnlWGS:JPKZTcan_09811_1s_mrna	hypothetical protein Tcan_09811 [Toxocara canis]	0	0	0	0.523672	0	0	0.36666	0.999592	0.000572878	-10.7695	down
Tcan_12272	gnlWGS:JPKZTcan_12272_1s_mrna	hypothetical protein Tcan_12272 [Toxocara canis]	0	0	0	0	0	0.51951	0.353947	0.999592	0.000577467	-10.758	down
Tcan_14516	gnlWGS:JPKZTcan_14516_1s_mrna	hypothetical protein Tcan_14516 [Toxocara canis]	0	0	0	0.33465	0.182887	0	0.255287	0.999592	0.000579669	-10.7525	down
Tcan_07681	gnlWGS:JPKZTcan_07681_1s_mrna	hypothetical protein Tcan_07681 [Toxocara canis]	0	0	0	0.186962	0.322572	0	0.198015	0.999592	0.000588773	-10.73	down
Tcan_00249	gnlWGS:JPKZTcan_00249_1s_mrna	hypothetical protein Tcan_00249, partial [Toxocara canis]	0	0	0	0.292971	0.213653	0	0.172019	0.999592	0.000592155	-10.7217	down
Tcan_08957	gnlWGS:JPKZTcan_08957_1s_mrna	hypothetical protein Tcan_08957 [Toxocara canis]	0	0	0	0.196865	0.306142	0	0.121774	0.999592	0.000596413	-10.7114	down
Tcan_01670	gnlWGS:JPKZTcan_01670_1s_mrna	hypothetical protein Tcan_01670, partial [Toxocara canis]	0	0	0	0	0.143997	0.355656	0.125378	0.999592	0.000600417	-10.7017	down
Tcan_04797	gnlWGS:JPKZTcan_04797_1s_mrna	hypothetical protein Tcan_04797 [Toxocara canis]	0	0	0	0.153186	0.335476	0	0.0813905	0.999592	0.000613921	-10.6697	down
Tcan_03967	gnlWGS:JPKZTcan_03967_1s_mrna	hypothetical protein Tcan_03967 [Toxocara canis]	0	0	0	0.487154	0	0	0.398028	0.999592	0.000615822	-10.6652	down
Tcan_14458	gnlWGS:JPKZTcan_14458_1s_mrna	hypothetical protein Tcan_14458 [Toxocara canis]	0	0	0	0.330362	0.155361	0	0.0650112	0.999592	0.000617636	-10.661	down
Tcan_13273	gnlWGS:JPKZTcan_13273_1s_mrna	hypothetical protein Tcan_13273 [Toxocara canis]	0	0	0	0	0.459735	0	0.250786	0.999592	0.00065255	-10.5816	down
Tcan_01646	gnlWGS:JPKZTcan_01646_1s_mrna	hypothetical protein Tcan_01646, partial [Toxocara canis]	0	0	0	0	0	0.443803	0.213082	0.999592	0.000675976	-10.5307	down
Tcan_03211	gnlWGS:JPKZTcan_03211_1s_mrna	hypothetical protein Tcan_03211 [Toxocara canis]	0	0	0	0.263112	0.180606	0	0.440093	0.999592	0.000676105	-10.5305	down
Tcan_17120	gnlWGS:JPKZTcan_17120_1s_mrna	Uncharacterized protein Tcan_17120 [Toxocara canis]	0	0	0	0	0.257594	0.183465	0.227162	0.999592	0.000680181	-10.5218	down
Tcan_06403	gnlWGS:JPKZTcan_06403_1s_mrna	hypothetical protein Tcan_06403 [Toxocara canis]	0	0	0	0	0	0.430504	0.353947	0.999592	0.000696858	-10.4868	down
Tcan_10695	gnlWGS:JPKZTcan_10695_1s_mrna	Histone H2A [Toxocara canis]	0	0	0	0	0	0.42509	0.300532	0.999592	0.000705733	-10.4686	down
Tcan_00265	gnlWGS:JPKZTcan_00265_1s_mrna	hypothetical protein Tcan_00265 [Toxocara canis]	0	0	0	0	0.424975	0	0.347334	0.999592	0.000705924	-10.4682	down
Tcan_08477	gnlWGS:JPKZTcan_08477_1s_mrna	hypothetical protein Tcan_08477 [Toxocara canis]	0	0	0	0	0	0.422281	0.3246	0.999592	0.000710427	-10.459	down
Tcan_02226	gnlWGS:JPKZTcan_02226_1s_mrna	Putative carbonic anhydrase 5, partial [Toxocara canis]	0	0	0	0	0	0.405499	0.3246	0.999592	0.000739829	-10.4005	down
Tcan_06627	gnlWGS:JPKZTcan_06627_1s_mrna	unnamed protein product [Toxocara canis]	0	0	0	0.403391	0	0	0.340776	0.999592	0.000743695	-10.393	down
Tcan_10020	gnlWGS:JPKZTcan_10020_1s_mrna	Transcription factor HES-1 [Toxocara canis]	0	0	0	0.323076	0	0.072465	0.108247	0.999592	0.000758455	-10.3646	down
Tcan_09433	gnlWGS:JPKZTcan_09433_1s_mrna	hypothetical protein Tcan_09433 [Toxocara canis]	0	0	0	0.386987	0	0	0.28393	0.999592	0.00077522	-10.3331	down
Tcan_13732	gnlWGS:JPKZTcan_13732_1s_mrna	hypothetical protein Tcan_13732 [Toxocara canis]	0	0	0	0	0.376937	0	0.347334	0.999592	0.000795889	-10.2951	down
Tcan_13836	gnlWGS:JPKZTcan_13836_1s_mrna	hypothetical protein Tcan_13836 [Toxocara canis]	0	0	0	0.131111	0.235078	0	0.337545	0.999592	0.000819249	-10.2534	down
Tcan_13516	gnlWGS:JPKZTcan_13516_1s_mrna	hypothetical protein Tcan_13516, partial [Toxocara canis]	0	0	0	0.221565	0	0.130646	0.362539	0.999592	0.000851762	-10.1973	down
Tcan_07988	gnlWGS:JPKZTcan_07988_1s_mrna	hypothetical protein Tcan_07988 [Toxocara canis]	0	0	0	0.228082	0	0.113638	0.362539	0.999592	0.000877912	-10.1536	down
Tcan_03539	gnlWGS:JPKZTcan_03539_1s_mrna	hypothetical protein Tcan_03539 [Toxocara canis]	0	0	0	0.336343	0	0	0.36666	0.999592	0.000891947	-10.1308	down
Tcan_06133	gnlWGS:JPKZTcan_06133_1s_mrna	hypothetical protein Tcan_06133 [Toxocara canis]	0	0	0	0	0.334287	0	0.444605	0.999592	0.000897432	-10.1219	down
Tcan_18542	gnlWGS:JPKZTcan_18542_1s_mrna	Homeobox protein ceh-36 [Toxocara canis]	0	0	0	0.275992	0.057535	0	0.230392	0.999592	0.000899477	-10.1186	down
Tcan_16103	gnlWGS:JPKZTcan_16103_1s_mrna	Sodium-dependent high-affinity dicarboxylate transporter 3 [Toxocara canis]	0	0	0	0.171745	0.157608	0	0.22217	0.999592	0.000910877	-10.1005	down
Tcan_18740	gnlWGS:JPKZTcan_18740_1s_mrna	hypothetical protein Tcan_18740, partial [Toxocara canis]	0	0	0	0.170934	0.156127	0	0.171958	0.999592	0.00091726	-10.0904	down
Tcan_18228	gnlWGS:JPKZTcan_18228_1s_mrna	hypothetical protein Tcan_18228 [Toxocara canis]	0	0	0	0.324587	0	0	0.437143	0.999592	0.000924251	-10.0794	down
Tcan_17995	gnlWGS:JPKZTcan_17995_1s_mrna		0	0	0	0	0.323455	0	0.405162	0.999592	0.000927486	-10.0744	down
Tcan_13938	gnlWGS:JPKZTcan_13938_1s_mrna	hypothetical protein Tcan_13938 [Toxocara canis]	0	0	0	0.321273	0	0	0.28393	0.999592	0.000933785	-10.0646	down
Tcan_06213	gnlWGS:JPKZTcan_06213_1s_mrna	hypothetical protein Tcan_06213 [Toxocara canis]	0	0	0	0	0.315042	0	0.495677	0.999592	0.000952254	-10.0364	down
Tcan_18724	gnlWGS:JPKZTcan_18724_1s_mrna		0	0	0	0.314918	0	0	0.398028	0.999592	0.000952629	-10.0358	down
Tcan_15410	gnlWGS:JPKZTcan_15410_1s_mrna	Histone H4 [Toxocara canis]	0	0	0	0	0.134894	0.179938	0.296615	0.999592	0.000952889	-10.0354	down
Tcan_12676	gnlWGS:JPKZTcan_12676_1s_mrna	hypothetical protein Tcan_12676, partial [Toxocara canis]	0	0	0	0	0.314539	0	0.306302	0.999592	0.000953777	-10.0341	down
Tcan_01704	gnlWGS:JPKZTcan_01704_1s_mrna	putative DNA repair protein RAD50 [Toxocara canis]	0	0	0	0	0.31406	0	0.373493	0.999592	0.000955231	-10.0319	down
Tcan_06757	gnlWGS:JPKZTcan_06757_1s_mrna	TNF receptor-associated factor 1 [Toxocara canis]	0	0	0	0	0.311876	0	0.250786	0.999592	0.000961921	-10.0218	down
Tcan_13431	gnlWGS:JPKZTcan_13431_1s_mrna	Plexin-2 [Toxocara canis]	0	0	0	0.138877	0	0.171883	0.163888	0.999592	0.000965375	-10.0166	down
Tcan_06916	gnlWGS:JPKZTcan_06916_1s_mrna	Far upstream element-binding protein 1 [Toxocara canis]	0	0	0	0	0	0.309131	0.213082	0.999592	0.000970462	-10.009	down
Tcan_05098	gnlWGS:JPKZTcan_05098_1s_mrna	hypothetical protein Tcan_05098 [Toxocara canis]	0	0	0	0	0.296766	0	0.405162	0.999592	0.0010109	-9.95015	down
Tcan_01315	gnlWGS:JPKZTcan_01315_1s_mrna	hypothetical protein Tcan_01214, partial [Toxocara canis]	0	0	0	0.086798	0.208921	0	0.258388	0.999592	0.00101448	-9.94505	down
Tcan_13434	gnlWGS:JPKZTcan_13434_1s_mrna	Suppressor of presenilin protein 4 [Toxocara canis]	0	0	0	0.136386	0.158741	0	0.09646	0.999592	0.00101651	-9.94216	down
Tcan_16019	gnlWGS:JPKZTcan_16019_1s_mrna	hypothetical protein Tcan_16019 [Toxocara canis]	0	0	0	0	0.294094	0	0.444605	0.999592	0.00102008	-9.9371	down
Tcan_05691	gnlWGS:JPKZTcan_05691_1s_mrna	hypothetical protein Tcan_05691 [Toxocara canis]	0	0	0	0.259182	0.028506	0	0.16501	0.999592	0.0010428	-9.90533	down
Tcan_15294	gnlWGS:JPKZTcan_15294_1s_mrna	hypothetical protein Tcan_15294 [Toxocara canis]	0	0	0	0	0	0.287421	0.390819	0.999592	0.00104377	-9.90399	down
Tcan_12446	gnlWGS:JPKZTcan_12446_1s_mrna	hypothetical protein Tcan_12446 [Toxocara canis]	0	0	0	0	0.189872	0.09736	0.544196	0.999592	0.00104445	-9.90304	down
Tcan_16879	gnlWGS:JPKZTcan_16879_1s_mrna	hypothetical protein Tcan_16879 [Toxocara canis]	0	0	0	0	0.106202	0.174261	0.409726	0.999592	0.00106966	-9.86863	down
Tcan_07084	gnlWGS:JPKZTcan_07084_1s_mrna	hypothetical protein Tcan_07084 [Toxocara canis]	0	0	0	0.280284	0	0	0.28393	0.999592	0.00107034	-9.86771	down
Tcan_18511	gnlWGS:JPKZTcan_18511_1s_mrna	hypothetical protein Tcan_18511 [Toxocara canis]	0	0	0	0.091885	0	0.178564	0.161511	0.999592	0.00110927	-9.81618	down
Tcan_00233	gnlWGS:JPKZTcan_00233_1s_mrna	hypothetical protein Tcan_00233, partial [Toxocara canis]	0	0	0	0.269821	0	0	0.437143	0.999592	0.00111185	-9.81282	down
Tcan_05090	gnlWGS:JPKZTcan_05090_1s_mrna	putative endochitinase [Toxocara canis]	0	0	0	0	0.182373	0.087075	0.0723832	0.999592	0.00111339	-9.81083	down
Tcan_13513	gnlWGS:JPKZTcan_13513_1s_mrna	hypothetical protein Tcan_13513, partial [Toxocara canis]	0	0	0	0	0.267482	0	0.306302	0.999592	0.00112157	-9.80026	down
Tcan_11014	gnlWGS:JPKZTcan_11014_1s_mrna	hypothetical protein Tcan_11014 [Toxocara canis]	0	0	0	0	0.164442	0.098345	0.421142	0.999592	0.00114161	-9.77472	down
Tcan_05756	gnlWGS:JPKZTcan_05756_1s_mrna	hypothetical protein Tcan_05756 [Toxocara canis]	0	0	0	0	0	0.260302	0.300532	0.999592	0.00115251	-9.76101	down
Tcan_00742	gnlWGS:JPKZTcan_00742_1s_mrna	hypothetical protein Tcan_00742, partial [Toxocara canis]	0	0	0	0.259421	0	0	0.437143	0.999592	0.00115642	-9.75612	down
Tcan_12513	gnlWGS:JPKZTcan_12513_1s_mrna	hypothetical protein Tcan_12513 [Toxocara canis]	0	0	0	0.255246	0	0	0.398028	0.999592	0.00117534	-9.73271	down
Tcan_04977	gnlWGS:JPKZTcan_04977_1s_mrna	Transmembrane protease serine 6, partial [Toxocara canis]	0	0	0	0.255042	0	0	0.256857	0.999592	0.00117628	-9.73156	down
Tcan_14940	gnlWGS:JPKZTcan_14940_1s_mrna	hypothetical protein Tcan_14940 [Toxocara canis]	0	0	0	0	0.254894	0	0.565685	0.999592	0.00117696	-9.73072	down
Tcan_02257	gnlWGS:JPKZTcan_02257_1s_mrna	hypothetical protein Tcan_02257, partial [Toxocara canis]	0	0	0	0.2525	0	0	0.487868	0.999592	0.00118812	-9.71711	down
Tcan_03195	gnlWGS:JPKZTcan_03195_1s_mrna	Tau-tubulin kinase 2 [Toxocara canis]	0	0	0	0	0	0.252383	0.263098	0.999592	0.00118867	-9.71644	down
Tcan_06855	gnlWGS:JPKZTcan_06855_1s_mrna	hypothetical protein Tcan_06855 [Toxocara canis]	0	0	0	0	0.249803	0	0.495677	0.999592	0.00120095	-9.70161	down
Tcan_05659	gnlWGS:JPKZTcan_05659_1s_mrna	hypothetical protein Tcan_05659 [Toxocara canis]	0	0	0	0.126942	0	0.121511	0.462008	0.999592	0.00120747	-9.69379	down
Tcan_13937	gnlWGS:JPKZTcan_13937_1s_mrna	hypothetical protein Tcan_13937 [Toxocara canis]	0	0	0	0.247474	0	0	0.487868	0.999592	0.00121225	-9.6881	down
Tcan_02378	gnlWGS:JPKZTcan_02378_1s_mrna	Transcription termination factor 2 [Toxocara canis]	0	0	0	0	0.243606	0	0.565685	0.999592	0.0012315	-9.66537	down
Tcan_02280	gnlWGS:JPKZTcan_02280_1s_mrna	hypothetical protein Tcan_02280 [Toxocara canis]	0	0	0	0.24344	0	0	0.487868	0.999592	0.00123234	-9.66439	down
Tcan_05293	gnlWGS:JPKZTcan_05293_1s_mrna	Lipase -like protein [Toxocara canis]	0	0	0	0.243432	0	0	0.318947	0.999592	0.00123238	-9.66434	down
Tcan_06009	gnlWGS:JPKZTcan_06009_1s_mrna	hypothetical protein Tcan_06009, partial [Toxocara canis]	0	0	0	0	0.2426	0	0.444605	0.999592	0.0012366	-9.6594	down
Tcan_05497	gnlWGS:JPKZTcan_05497_1s_mrna	Chondroitin proteoglycan 3 [Toxocara canis]	0	0	0	0	0.103044	0.138703	0.296615	0.999592	0.00124097	-9.65432	down
Tcan_10600	gnlWGS:JPKZTcan_10600_1s_mrna	hypothetical protein Tcan_10600 [Toxocara canis]	0	0	0	0	0	0.239564	0.353947	0.999592	0.00125227	-9.64123	down
Tcan_00820	gnlWGS:JPKZTcan_00820_1s_mrna	hypothetical protein Tcan_00820, partial [Toxocara canis]	0	0	0	0.204871	0.034652	0	0.438612	0.999592	0.00125249	-9.64099	down
Tcan_01065	gnlWGS:JPKZTcan_01065_1s_mrna	hypothetical protein Tcan_01065, partial [Toxocara canis]	0	0	0	0	0.239276	0	0.495677	0.999592	0.00125378	-9.6395	down
Tcan_18779	gnlWGS:JPKZTcan_18779_1s_mrna	hypothetical protein Tcan_18779 [Toxocara canis]	0	0	0	0	0	0.232574	0.506273	0.999592	0.00128991	-9.59851	down
Tcan_00626	gnlWGS:JPKZTcan_00626_1s_mrna	hypothetical protein Tcan_00626, partial [Toxocara canis]	0	0	0	0	0	0.22921	0.439095	0.999592	0.00130884	-9.57749	down
Tcan_18062	gnlWGS:JPKZTcan_18062_1s_mrna	putative serine/threonine-protein kinase [Toxocara canis]	0	0	0	0.116129	0	0.112573	0.100736	0.999592	0.00131175	-9.57429	down
Tcan_05093	gnlWGS:JPKZTcan_05093_1s_mrna	hypothetical protein Tcan_05093 [Toxocara canis]	0	0	0	0	0.1512	0.073659	0.480004	0.999592	0.00133417	-9.54984	down
Tcan_00406	gnlWGS:JPKZTcan_00406_1s_mrna	hypothetical protein Tcan_00406, partial [Toxocara canis]	0	0	0	0	0	0.224836	0.439095	0.999592	0.00133431	-9.54969	down
Tcan_09574	gnlWGS:JPKZTcan_09574_1s_mrna	hypothetical protein Tcan_09574 [Toxocara canis]	0	0	0	0	0.22367	0	0.495677	0.999592	0.00134126	-9.54219	down
Tcan_12943	gnlWGS:JPKZTcan_12943_1s_mrna	hypothetical protein Tcan_12943 [Toxocara canis]	0	0	0	0	0.165904	0.05349	0.105492	0.999592	0.0013674	-9.51435	down
Tcan_06203	gnlWGS:JPKZTcan_06203_1s_mrna	Protein 4.1 -like protein [Toxocara canis]	0	0	0	0	0.218399	0	0.495677	0.999592	0.00137363	-9.50779	down
Tcan_09010	gnlWGS:JPKZTcan_09010_1s_mrna	hypothetical protein Tcan_09010 [Toxocara canis]	0	0	0	0	0	0.218388	0.506273	0.999592	0.0013737	-9.50772	down
Tcan_03963	gnlWGS:JPKZTcan_03963_1s_mrna	hypothetical protein Tcan_03963 [Toxocara canis]	0	0	0	0	0.218266	0	0.495677	0.999592	0.00137447	-9.50691	down
Tcan_10184	gnlWGS:JPKZTcan_10184_1s_mrna	hypothetical protein Tcan_10184 [Toxocara canis]	0	0	0	0.217225	0	0	0.318947	0.999592	0.00138106	-9.50001	down
Tcan_02800	gnlWGS:JPKZTcan_02800_1s_mrna	Wiskott-Aldrich syndrome protein, partial [Toxocara canis]	0	0	0	0	0.217146	0	0.347334	0.999592	0.00138156	-9.49949	down
Tcan_11457	gnlWGS:JPKZTcan_11457_1s_mrna	hypothetical protein Tcan_11457 [Toxocara canis]	0	0	0	0	0.21612	0	0.347334	0.999592	0.00138812	-9.49265	down
Tcan_05081	gnlWGS:JPKZTcan_05081_1s_mrna	hypothetical protein Tcan_05081 [Toxocara canis]	0	0	0	0	0	0.21402	0.439095	0.999592	0.00140174	-9.47857	down
Tcan_14248	gnlWGS:JPKZTcan_14248_1s_mrna	Tyrosine-protein kinase Fps85D [Toxocara canis]	0	0	0	0.084484	0.128811	0	0.154259	0.999592	0.0014065	-9.47367	down
Tcan_00954	gnlWGS:JPKZTcan_00954_1s_mrna	hypothetical protein Tcan_00954, partial [Toxocara canis]	0	0	0	0	0	0.212829	0.439095	0.999592	0.00140958	-9.47052	down
Tcan_01167	gnlWGS:JPKZTcan_01167_1s_mrna	hypothetical protein Tcan_01167, partial [Toxocara canis]	0	0	0	0	0	0.212524	0.439095	0.999592	0.00141161	-9.46845	down
Tcan_16042	gnlWGS:JPKZTcan_16042_1s_mrna	hypothetical protein Tcan_16042 [Toxocara canis]	0	0	0	0	0	0.212461	0.439095	0.999592	0.00141202	-9.46802	down
Tcan_18082	gnlWGS:JPKZTcan_18082_1s_mrna	Alkylglycerol monooxygenase -like protein [Toxocara canis]	0	0	0	0	0.211994	0	0.275275	0.999592	0.00141513	-9.46485	down
Tcan_16230	gnlWGS:JPKZTcan_16230_1s_mrna	hypothetical protein Tcan_16230 [Toxocara canis]	0	0	0	0.211936	0	0	0.437143	0.999592	0.00141552	-9.46445	down
Tcan_03129	gnlWGS:JPKZTcan_03129_1s_mrna	hypothetical protein Tcan_03129 [Toxocara canis]	0	0	0	0	0.163061	0.047373	0.167665	0.999592	0.00142563	-9.45419	down
Tcan_03305	gnlWGS:JPKZTcan_03305_1s_mrna	hypothetical protein Tcan_03305 [Toxocara canis]	0	0	0	0.208763	0	0	0.340776	0.999592	0.00143704	-9.44269	down
Tcan_16188	gnlWGS:JPKZTcan_16188_1s_mrna	Tau-tubulin kinase 1 [Toxocara canis]	0	0	0	0.039234	0.167011	0	0.235649	0.999592	0.00145458	-9.42518	down
Tcan_17738	gnlWGS:JPKZTcan_17738_1s_mrna	hypothetical protein Tcan_17738 [Toxocara canis]	0	0	0	0	0.205723	0	0.289802	0.999592	0.00145827	-9.42152	down
Tcan_09521	gnlWGS:JPKZTcan_09521_1s_mrna	hypothetical protein Tcan_09521 [Toxocara canis]	0	0	0	0.20129	0	0	0.487868	0.999592	0.00149039	-9.3901	down
Tcan_04062	gnlWGS:JPKZTcan_04062_1s_mrna	Cyclin N-terminal domain-containing protein 1 [Toxocara canis]	0	0	0	0.103122	0.097593	0	0.171958	0.999592	0.00149466	-9.38597	down
Tcan_01320	gnlWGS:JPKZTcan_01320_1s_mrna		0	0	0	0.038362	0	0.159556	0.450215	0.999592	0.00151578	-9.36572	down
Tcan_10253	gnlWGS:JPKZTcan_10253_1s_mrna	hypothetical protein Tcan_10253 [Toxocara canis]	0	0	0	0	0	0.197632	0.506273	0.999592	0.00151797	-9.36364	down
Tcan_14908	gnlWGS:JPKZTcan_14908_1s_mrna	hypothetical protein Tcan_14908 [Toxocara canis]	0	0	0	0.106203	0.03164	0.059597	0.182848	0.999592	0.00151945	-9.36224	down
Tcan_10775	gnlWGS:JPKZTcan_10775_1s_mrna	hypothetical protein Tcan_10775, partial [Toxocara canis]	0	0	0	0	0	0.187633	0.439095	0.999592	0.00159887	-9.28874	down
Tcan_00957	gnlWGS:JPKZTcan_00957_1s_mrna	Putative uncharacterized transposon-derived protein F52C9.6, partial [Toxocara canis]	0	0	0	0	0.187053	0	0.444605	0.999592	0.00160382	-9.28427	down
Tcan_10857	gnlWGS:JPKZTcan_10857_1s_mrna	Testis-specific serine/threonine-protein kinase 4 [Toxocara canis]	0	0	0	0	0.186992	0	0.306302	0.999592	0.00160435	-9.2838	down
Tcan_12145	gnlWGS:JPKZTcan_12145_1s_mrna	hypothetical protein Tcan_12145 [Toxocara canis]	0	0	0	0	0.184602	0	0.275275	0.999592	0.00162512	-9.26524	down
Tcan_06721	gnlWGS:JPKZTcan_06721_1s_mrna	26S protease regulatory subunit 7 [Toxocara canis]	0	0	0	0.129916	0.053619	0	0.138412	0.999592	0.00163457	-9.25688	down
Tcan_02249	gnlWGS:JPKZTcan_02249_1s_mrna	Receptor-type tyrosine-protein phosphatase beta [Toxocara canis]	0	0	0	0.182844	0	0	0.487868	0.999592	0.00164074	-9.25144	down
Tcan_05272	gnlWGS:JPKZTcan_05272_1s_mrna	Deoxyribonuclease-2 [Toxocara canis]	0	0	0	0.066112	0.115517	0	0.198015	0.999592	0.00165172	-9.24182	down
Tcan_01210	gnlWGS:JPKZTcan_01210_1s_mrna		0	0	0	0.181425	0	0	0.557544	0.999592	0.00165358	-9.2402	down
Tcan_00413	gnlWGS:JPKZTcan_00413_1s_mrna	unnamed protein product [Toxocara canis]	0	0	0	0	0.180466	0	0.670946	0.999592	0.00166236	-9.23255	down
Tcan_07613	gnlWGS:JPKZTcan_07613_1s_mrna	Clotting factor B [Toxocara canis]	0	0	0	0.153094	0	0.026371	0.337695	0.999592	0.00167164	-9.22452	down
Tcan_15349	gnlWGS:JPKZTcan_15349_1s_mrna	Cyclin-dependent kinase 1 [Toxocara canis]	0	0	0	0.179339	0	0	0.318947	0.999592	0.00167281	-9.22351	down
Tcan_09393	gnlWGS:JPKZTcan_09393_1s_mrna	hypothetical protein Tcan_09393 [Toxocara canis]	0	0	0	0.088968	0.089929	0	0.666759	0.999592	0.00167694	-9.21995	down
Tcan_02885	gnlWGS:JPKZTcan_02885_1s_mrna	hypothetical protein Tcan_02885 [Toxocara canis]	0	0	0	0	0.118303	0.060549	0.369068	0.999592	0.00167736	-9.21959	down
Tcan_09802	gnlWGS:JPKZTcan_09802_1s_mrna	TWiK family of potassium channels protein 18 [Toxocara canis]	0	0	0	0	0.178202	0	0.240337	0.999592	0.00168348	-9.21434	down
Tcan_15131	gnlWGS:JPKZTcan_15131_1s_mrna	hypothetical protein Tcan_15131 [Toxocara canis]	0	0	0	0	0.178118	0	0.325256	0.999592	0.00168428	-9.21366	down
Tcan_04979	gnlWGS:JPKZTcan_04979_1s_mrna	Ovochymase-2 [Toxocara canis]	0	0	0	0	0	0.177859	0.280342	0.999592	0.00168673	-9.21156	down
Tcan_18035	gnlWGS:JPKZTcan_18035_1s_mrna	hypothetical protein Tcan_18035 [Toxocara canis]	0	0	0	0	0.176957	0	0.670946	0.999592	0.00169533	-9.20422	down
Tcan_00575	gnlWGS:JPKZTcan_00575_1s_mrna	hypothetical protein Tcan_00575, partial [Toxocara canis]	0	0	0	0.017299	0.158625	0	0.443089	0.999592	0.00170528	-9.19577	down
Tcan_06003	gnlWGS:JPKZTcan_06003_1s_mrna	Phospholipase A2-like protein Y52B11A.8 [Toxocara canis]	0	0	0	0.175574	0	0	0.269594	0.999592	0.00170868	-9.1929	down
Tcan_08039	gnlWGS:JPKZTcan_08039_1s_mrna	hypothetical protein Tcan_08039 [Toxocara canis]	0	0	0	0	0.175557	0	0.405162	0.999592	0.00170885	-9.19276	down
Tcan_00371	gnlWGS:JPKZTcan_00371_1s_mrna	hypothetical protein Tcan_00371 [Toxocara canis]	0	0	0	0.174772	0	0	0.487868	0.999592	0.00171652	-9.1863	down
Tcan_00994	gnlWGS:JPKZTcan_00994_1s_mrna	unnamed protein product [Toxocara canis]	0	0	0	0	0.174426	0	0.495677	0.999592	0.00171993	-9.18344	down
Tcan_01430	gnlWGS:JPKZTcan_01430_1s_mrna	hypothetical protein Tcan_01430 [Toxocara canis]	0	0	0	0	0.174315	0	0.495677	0.999592	0.00172102	-9.18252	down
Tcan_02042	gnlWGS:JPKZTcan_02042_1s_mrna	hypothetical protein Tcan_02042 [Toxocara canis]	0	0	0	0	0.174118	0	0.565685	0.999592	0.00172297	-9.18089	down
Tcan_00080	gnlWGS:JPKZTcan_00080_1s_mrna	hypothetical protein Tcan_00080 [Toxocara canis]	0	0	0	0	0	0.173127	0.439095	0.999592	0.00173283	-9.17265	down
Tcan_12136	gnlWGS:JPKZTcan_12136_1s_mrna	hypothetical protein Tcan_12136 [Toxocara canis]	0	0	0	0	0.169654	0	0.495677	0.999592	0.0017683	-9.14342	down
Tcan_10089	gnlWGS:JPKZTcan_10089_1s_mrna	hypothetical protein Tcan_10089 [Toxocara canis]	0	0	0	0	0	0.167953	0.439095	0.999592	0.00178621	-9.12888	down
Tcan_04740	gnlWGS:JPKZTcan_04740_1s_mrna	Putative serine/threonine-protein kinase [Toxocara canis]	0	0	0	0.072991	0.094349	0	0.136003	0.999592	0.00179276	-9.1236	down
Tcan_09798	gnlWGS:JPKZTcan_09798_1s_mrna	Mitogen-activated protein kinase Hog1 [Toxocara canis]	0	0	0	0.167152	0	0	0.487868	0.999592	0.00179477	-9.12198	down
Tcan_12475	gnlWGS:JPKZTcan_12475_1s_mrna	UPF0392 protein F13G3.3 [Toxocara canis]	0	0	0	0.164591	0	0	0.28393	0.999592	0.0018227	-9.09971	down
Tcan_05016	gnlWGS:JPKZTcan_05016_1s_mrna	Putative carbonic anhydrase 5 [Toxocara canis]	0	0	0	0	0	0.162258	0.506273	0.999592	0.00184891	-9.07911	down
Tcan_05104	gnlWGS:JPKZTcan_05104_1s_mrna	hypothetical protein Tcan_05104 [Toxocara canis]	0	0	0	0	0.161872	0	0.565685	0.999592	0.00185332	-9.07568	down
Tcan_12116	gnlWGS:JPKZTcan_12116_1s_mrna	hypothetical protein Tcan_12116 [Toxocara canis]	0	0	0	0	0	0.16111	0.439095	0.999592	0.00186208	-9.06887	down
Tcan_03922	gnlWGS:JPKZTcan_03922_1s_mrna	hypothetical protein Tcan_03922 [Toxocara canis]	0	0	0	0.158069	0	0	0.557544	0.999592	0.00189791	-9.04138	down
Tcan_15595	gnlWGS:JPKZTcan_15595_1s_mrna	hypothetical protein Tcan_15595 [Toxocara canis]	0	0	0	0.157701	0	0	0.557544	0.999592	0.00190233	-9.03801	down
Tcan_03612	gnlWGS:JPKZTcan_03612_1s_mrna	hypothetical protein Tcan_03612 [Toxocara canis]	0	0	0	0.157454	0	0	0.487868	0.999592	0.00190532	-9.03575	down
Tcan_12644	gnlWGS:JPKZTcan_12644_1s_mrna	hypothetical protein Tcan_12644 [Toxocara canis]	0	0	0	0	0	0.154233	0.439095	0.999592	0.00194511	-9.00593	down
Tcan_15780	gnlWGS:JPKZTcan_15780_1s_mrna	hypothetical protein Tcan_15780 [Toxocara canis]	0	0	0	0	0	0.153777	0.609576	0.999592	0.00195088	-9.00166	down
Tcan_03173	gnlWGS:JPKZTcan_03173_1s_mrna	hypothetical protein Tcan_03173 [Toxocara canis]	0	0	0	0	0.153045	0	0.306302	0.999592	0.00196021	-8.99478	down
Tcan_13894	gnlWGS:JPKZTcan_13894_1s_mrna	hypothetical protein Tcan_13894 [Toxocara canis]	0	0	0	0	0	0.152869	0.439095	0.999592	0.00196246	-8.99312	down
Tcan_10666	gnlWGS:JPKZTcan_10666_1s_mrna	hypothetical protein Tcan_10666 [Toxocara canis]	0	0	0	0.152672	0	0	0.398028	0.999592	0.001965	-8.99126	down
Tcan_12059	gnlWGS:JPKZTcan_12059_1s_mrna	hypothetical protein Tcan_12059 [Toxocara canis]	0	0	0	0	0	0.152646	0.506273	0.999592	0.00196533	-8.99101	down
Tcan_15952	gnlWGS:JPKZTcan_15952_1s_mrna	hypothetical protein Tcan_15952 [Toxocara canis]	0	0	0	0.152517	0	0	0.437143	0.999592	0.00196699	-8.98979	down
Tcan_07263	gnlWGS:JPKZTcan_07263_1s_mrna	Putative cuticle collagen [Toxocara canis]	0	0	0	0.150904	0	0	0.398028	0.999592	0.00198802	-8.97445	down
Tcan_07763	gnlWGS:JPKZTcan_07763_1s_mrna	hypothetical protein Tcan_07763 [Toxocara canis]	0	0	0	0	0.150107	0	0.565685	0.999592	0.00199857	-8.96681	down
Tcan_09590	gnlWGS:JPKZTcan_09590_1s_mrna	hypothetical protein Tcan_09590 [Toxocara canis]	0	0	0	0	0.071352	0.078674	0.353121	0.999592	0.00199965	-8.96603	down
Tcan_14796	gnlWGS:JPKZTcan_14796_1s_mrna	Sodium/hydrogen exchanger 9B1 [Toxocara canis]	0	0	0	0	0.147844	0	0.262361	0.999592	0.00202917	-8.9449	down
Tcan_02143	gnlWGS:JPKZTcan_02143_1s_mrna	hypothetical protein Tcan_02143, partial [Toxocara canis]	0	0	0	0	0.144628	0	0.565685	0.999592	0.00207429	-8.91317	down
Tcan_06357	gnlWGS:JPKZTcan_06357_1s_mrna	hypothetical protein Tcan_06357 [Toxocara canis]	0	0	0	0	0.144412	0	0.405162	0.999592	0.00207739	-8.91101	down
Tcan_11098	gnlWGS:JPKZTcan_11098_1s_mrna	CCR4-NOT transcription complex subunit 6 [Toxocara canis]	0	0	0	0	0.127733	0.016122	0.0793385	0.999592	0.00208543	-8.90544	down
Tcan_02007	gnlWGS:JPKZTcan_02007_1s_mrna	unnamed protein product [Toxocara canis]	0	0	0	0.101658	0.041103	0	0.489793	0.999592	0.00210141	-8.89442	down
Tcan_01476	gnlWGS:JPKZTcan_01476_1s_mrna	hypothetical protein Tcan_01476 [Toxocara canis]	0	0	0	0.142217	0	0	0.398028	0.999592	0.00210945	-8.88892	down
Tcan_10586	gnlWGS:JPKZTcan_10586_1s_mrna	Serine/arginine-rich splicing factor 4 [Toxocara canis]	0	0	0	0	0.136289	0	0.405162	0.999592	0.0022012	-8.82749	down
Tcan_09846	gnlWGS:JPKZTcan_09846_1s_mrna	hypothetical protein Tcan_09846 [Toxocara canis]	0	0	0	0	0.134561	0	0.565685	0.999592	0.00222947	-8.80908	down
Tcan_15436	gnlWGS:JPKZTcan_15436_1s_mrna	hypothetical protein Tcan_15436 [Toxocara canis]	0	0	0	0	0.13438	0	0.373493	0.999592	0.00223248	-8.80714	down
Tcan_01464	gnlWGS:JPKZTcan_01464_1s_mrna	hypothetical protein Tcan_01464, partial [Toxocara canis]	0	0	0	0	0.132752	0	0.444605	0.999592	0.00225985	-8.78956	down
Tcan_17088	gnlWGS:JPKZTcan_17088_1s_mrna	hypothetical protein Tcan_17088 [Toxocara canis]	0	0	0	0.132292	0	0	0.557544	0.999592	0.00226771	-8.78455	down
Tcan_15792	gnlWGS:JPKZTcan_15792_1s_mrna	hypothetical protein Tcan_15792 [Toxocara canis]	0	0	0	0.131244	0	0	0.557544	0.999592	0.00228582	-8.77307	down
Tcan_10560	gnlWGS:JPKZTcan_10560_1s_mrna	ETS domain-containing protein Elk-1 [Toxocara canis]	0	0	0	0.130818	0	0	0.398028	0.999592	0.00229326	-8.76838	down
Tcan_04473	gnlWGS:JPKZTcan_04473_1s_mrna	hypothetical protein Tcan_04473 [Toxocara canis]	0	0	0	0	0	0.129793	0.353947	0.999592	0.00231137	-8.75703	down
Tcan_07624	gnlWGS:JPKZTcan_07624_1s_mrna	F-box/WD repeat-containing protein 7 [Toxocara canis]	0	0	0	0.129584	0	0	0.487868	0.999592	0.0023151	-8.75471	down
Tcan_08638	gnlWGS:JPKZTcan_08638_1s_mrna	hypothetical protein Tcan_08638 [Toxocara canis]	0	0	0	0	0.128881	0	0.373493	0.999592	0.00232773	-8.74686	down
Tcan_01460	gnlWGS:JPKZTcan_01460_1s_mrna		0	0	0	0.128459	0	0	0.487868	0.999592	0.00233538	-8.74213	down
Tcan_01857	gnlWGS:JPKZTcan_01857_1s_mrna	hypothetical protein Tcan_01857 [Toxocara canis]	0	0	0	0	0	0.128007	0.439095	0.999592	0.00234362	-8.73704	down
Tcan_10313	gnlWGS:JPKZTcan_10313_1s_mrna	hypothetical protein Tcan_10313 [Toxocara canis]	0	0	0	0	0.127794	0	0.565685	0.999592	0.00234753	-8.73464	down
Tcan_06305	gnlWGS:JPKZTcan_06305_1s_mrna	Zinc finger protein [Toxocara canis]	0	0	0	0	0	0.127642	0.300532	0.999592	0.00235032	-8.73292	down
Tcan_03396	gnlWGS:JPKZTcan_03396_1s_mrna	hypothetical protein Tcan_03396 [Toxocara canis]	0	0	0	0.127411	0	0	0.662628	0.999592	0.00235458	-8.73031	down
Tcan_12227	gnlWGS:JPKZTcan_12227_1s_mrna	hypothetical protein Tcan_12227 [Toxocara canis]	0	0	0	0	0	0.127042	0.353947	0.999592	0.00236142	-8.72613	down
Tcan_03820	gnlWGS:JPKZTcan_03820_1s_mrna	Putative cuticle collagen [Toxocara canis]	0	0	0	0	0	0.125999	0.353947	0.999592	0.00238097	-8.71423	down
Tcan_08011	gnlWGS:JPKZTcan_08011_1s_mrna	hypothetical protein Tcan_08011 [Toxocara canis]	0	0	0	0	0.125861	0	0.565685	0.999592	0.00238358	-8.71265	down
Tcan_00523	gnlWGS:JPKZTcan_00523_1s_mrna	hypothetical protein Tcan_00523, partial [Toxocara canis]	0	0	0	0.124555	0	0	0.557544	0.999592	0.00240857	-8.6976	down
Tcan_10686	gnlWGS:JPKZTcan_10686_1s_mrna	hypothetical protein Tcan_10686, partial [Toxocara canis]	0	0	0	0	0.12358	0	0.405162	0.999592	0.00242758	-8.68627	down
Tcan_00551	gnlWGS:JPKZTcan_00551_1s_mrna	hypothetical protein Tcan_00551, partial [Toxocara canis]	0	0	0	0.123338	0	0	0.557544	0.999592	0.00243234	-8.68344	down
Tcan_06621	gnlWGS:JPKZTcan_06621_1s_mrna	hypothetical protein Tcan_06621 [Toxocara canis]	0	0	0	0.12107	0	0	0.662628	0.999592	0.00247791	-8.65666	down
Tcan_00195	gnlWGS:JPKZTcan_00195_1s_mrna	hypothetical protein Tcan_00195, partial [Toxocara canis]	0	0	0	0.120511	0	0	0.662628	0.999592	0.0024894	-8.64999	down
Tcan_17072	gnlWGS:JPKZTcan_17072_1s_mrna	L-asparaginase [Toxocara canis]	0	0	0	0	0	0.119448	0.3246	0.999592	0.00251155	-8.6372	down
Tcan_07896	gnlWGS:JPKZTcan_07896_1s_mrna	hypothetical protein Tcan_07896 [Toxocara canis]	0	0	0	0	0.119281	0	0.565685	0.999592	0.00251507	-8.63519	down
Tcan_18839	gnlWGS:JPKZTcan_18839_1s_mrna	hypothetical protein Tcan_18839 [Toxocara canis]	0	0	0	0.117883	0	0	0.557544	0.999592	0.0025449	-8.61818	down
Tcan_05051	gnlWGS:JPKZTcan_05051_1s_mrna	hypothetical protein Tcan_05051 [Toxocara canis]	0	0	0	0.117312	0	0	0.662628	0.999592	0.00255728	-8.61117	down
Tcan_17786	gnlWGS:JPKZTcan_17786_1s_mrna	hypothetical protein Tcan_17786 [Toxocara canis]	0	0	0	0	0.116641	0	0.495677	0.999592	0.00257199	-8.6029	down
Tcan_01276	gnlWGS:JPKZTcan_01276_1s_mrna	hypothetical protein Tcan_01276, partial [Toxocara canis]	0	0	0	0.112206	0	0	0.557544	0.999592	0.00267365	-8.54697	down
Tcan_08900	gnlWGS:JPKZTcan_08900_1s_mrna	hypothetical protein Tcan_08900 [Toxocara canis]	0	0	0	0	0.111759	0	0.565685	0.999592	0.00268435	-8.54121	down
Tcan_00375	gnlWGS:JPKZTcan_00375_1s_mrna	hypothetical protein Tcan_00375, partial [Toxocara canis]	0	0	0	0.111449	0	0	0.487868	0.999592	0.00269181	-8.53721	down
Tcan_00439	gnlWGS:JPKZTcan_00439_1s_mrna	hypothetical protein Tcan_00439, partial [Toxocara canis]	0	0	0	0.061427	0.048375	0	0.666759	0.999592	0.00273219	-8.51573	down
Tcan_08349	gnlWGS:JPKZTcan_08349_1s_mrna	hypothetical protein Tcan_08349 [Toxocara canis]	0	0	0	0	0.10967	0	0.565685	0.999592	0.00273548	-8.51399	down
Tcan_14064	gnlWGS:JPKZTcan_14064_1s_mrna	Putative cuticle collagen [Toxocara canis]	0	0	0	0	0.108939	0	0.495677	0.999592	0.00275383	-8.50434	down
Tcan_04533	gnlWGS:JPKZTcan_04533_1s_mrna	hypothetical protein Tcan_04533 [Toxocara canis]	0	0	0	0.108204	0	0	0.662628	0.999592	0.00277254	-8.49458	down
Tcan_11701	gnlWGS:JPKZTcan_11701_1s_mrna	hypothetical protein Tcan_11701 [Toxocara canis]	0	0	0	0.107966	0	0	0.487868	0.999592	0.00277865	-8.4914	down
Tcan_12335	gnlWGS:JPKZTcan_12335_1s_mrna	hypothetical protein Tcan_12335 [Toxocara canis]	0	0	0	0	0.107265	0	0.670946	0.999592	0.00279681	-8.482	down
Tcan_08932	gnlWGS:JPKZTcan_08932_1s_mrna	hypothetical protein Tcan_08932 [Toxocara canis]	0	0	0	0	0.106825	0	0.565685	0.999592	0.00280833	-8.47607	down
Tcan_10981	gnlWGS:JPKZTcan_10981_1s_mrna	hypothetical protein Tcan_10981 [Toxocara canis]	0	0	0	0	0.106495	0	0.670946	0.999592	0.00281703	-8.47161	down
Tcan_01017	gnlWGS:JPKZTcan_01017_1s_mrna	hypothetical protein Tcan_01017, partial [Toxocara canis]	0	0	0	0	0.103872	0	0.670946	0.999592	0.00288817	-8.43563	down
Tcan_02796	gnlWGS:JPKZTcan_02796_1s_mrna	Tyrosine-protein kinase Fer [Toxocara canis]	0	0	0	0.103765	0	0	0.340776	0.999592	0.00289115	-8.43414	down
Tcan_09047	gnlWGS:JPKZTcan_09047_1s_mrna	hypothetical protein Tcan_09047 [Toxocara canis]	0	0	0	0.103194	0	0	0.487868	0.999592	0.00290715	-8.42618	down
Tcan_05746	gnlWGS:JPKZTcan_05746_1s_mrna	hypothetical protein Tcan_05746 [Toxocara canis]	0	0	0	0	0	0.102417	0.609576	0.999592	0.0029292	-8.41528	down
Tcan_15361	gnlWGS:JPKZTcan_15361_1s_mrna	hypothetical protein Tcan_15361 [Toxocara canis]	0	0	0	0	0	0.102118	0.439095	0.999592	0.00293778	-8.41106	down
Tcan_11296	gnlWGS:JPKZTcan_11296_1s_mrna	Tyrosine 3-monooxygenase [Toxocara canis]	0	0	0	0	0.10202	0	0.670946	0.999592	0.0029406	-8.40967	down
Tcan_04704	gnlWGS:JPKZTcan_04704_1s_mrna	Vesicle-associated membrane protein/synaptobrevin-binding protein [Toxocara canis]	0	0	0	0	0	0.100523	0.506273	0.999592	0.00298439	-8.38835	down
Tcan_14197	gnlWGS:JPKZTcan_14197_1s_mrna	Receptor-type tyrosine-protein phosphatase C [Toxocara canis]	0	0	0	0.019455	0.080506	0	0.300991	0.999592	0.00300117	-8.38026	down
Tcan_17208	gnlWGS:JPKZTcan_17208_1s_mrna	Hexokinase-2 [Toxocara canis]	0	0	0	0	0	0.097835	0.300532	0.999592	0.00306639	-8.34924	down
Tcan_18668	gnlWGS:JPKZTcan_18668_1s_mrna	hypothetical protein Tcan_18668 [Toxocara canis]	0	0	0	0.097702	0	0	0.557544	0.999592	0.00307056	-8.34728	down
Tcan_08925	gnlWGS:JPKZTcan_08925_1s_mrna	hypothetical protein Tcan_08925, partial [Toxocara canis]	0	0	0	0	0.09473	0	0.495677	0.999592	0.0031669	-8.30272	down
Tcan_11280	gnlWGS:JPKZTcan_11280_1s_mrna	hypothetical protein Tcan_11280, partial [Toxocara canis]	0	0	0	0	0.093939	0	0.565685	0.999592	0.00319356	-8.29062	down
Tcan_10273	gnlWGS:JPKZTcan_10273_1s_mrna	hypothetical protein Tcan_10273 [Toxocara canis]	0	0	0	0.092547	0	0	0.36666	0.999592	0.0032416	-8.26908	down
Tcan_10608	gnlWGS:JPKZTcan_10608_1s_mrna	hypothetical protein Tcan_10608 [Toxocara canis]	0	0	0	0	0.091764	0	0.495677	0.999592	0.00326926	-8.25682	down
Tcan_09384	gnlWGS:JPKZTcan_09384_1s_mrna	Tyrosine-protein kinase Fps85D [Toxocara canis]	0	0	0	0	0.091579	0	0.347334	0.999592	0.00327586	-8.25391	down
Tcan_02926	gnlWGS:JPKZTcan_02926_1s_mrna	Receptor-type tyrosine-protein phosphatase S [Toxocara canis]	0	0	0	0	0.091464	0	0.347334	0.999592	0.00327998	-8.2521	down
Tcan_13329	gnlWGS:JPKZTcan_13329_1s_mrna	hypothetical protein Tcan_13329 [Toxocara canis]	0	0	0	0	0.090296	0	0.495677	0.999592	0.00332241	-8.23356	down
Tcan_09167	gnlWGS:JPKZTcan_09167_1s_mrna	Protein LSM14 -like protein A [Toxocara canis]	0	0	0	0	0	0.089727	0.506273	0.999592	0.00334348	-8.22444	down
Tcan_08010	gnlWGS:JPKZTcan_08010_1s_mrna	hypothetical protein Tcan_08010 [Toxocara canis]	0	0	0	0	0.082273	0.00549	0.480004	0.999592	0.0034183	-8.19251	down
Tcan_15346	gnlWGS:JPKZTcan_15346_1s_mrna	Neprilysin-2 [Toxocara canis]	0	0	0	0.059845	0.025397	0	0.224742	0.999592	0.00351939	-8.15046	down
Tcan_14892	gnlWGS:JPKZTcan_14892_1s_mrna	hypothetical protein Tcan_14892 [Toxocara canis]	0	0	0	0	0.02079	0.064446	0.524453	0.999592	0.00351964	-8.15036	down
Tcan_04729	gnlWGS:JPKZTcan_04729_1s_mrna	hypothetical protein Tcan_04729 [Toxocara canis]	0	0	0	0	0.083357	0	0.495677	0.999592	0.00359898	-8.1182	down
Tcan_18717	gnlWGS:JPKZTcan_18717_1s_mrna	hypothetical protein Tcan_18717 [Toxocara canis]	0	0	0	0	0	0.08202	0.3246	0.999592	0.00365764	-8.09487	down
Tcan_10035	gnlWGS:JPKZTcan_10035_1s_mrna	hypothetical protein Tcan_10035, partial [Toxocara canis]	0	0	0	0	0	0.079273	0.609576	0.999592	0.00378439	-8.04572	down
Tcan_06860	gnlWGS:JPKZTcan_06860_1s_mrna	hypothetical protein Tcan_06860 [Toxocara canis]	0	0	0	0	0.077407	0	0.816155	0.999592	0.00387562	-8.01136	down
Tcan_14985	gnlWGS:JPKZTcan_14985_1s_mrna	hypothetical protein Tcan_06860 [Toxocara canis]	0	0	0	0	0.077407	0	0.816155	0.999592	0.00387562	-8.01136	down
Tcan_13164	gnlWGS:JPKZTcan_13164_1s_mrna	hypothetical protein Tcan_13164 [Toxocara canis]	0	0	0	0	0	0.075892	0.506273	0.999592	0.00395299	-7.98284	down
Tcan_02406	gnlWGS:JPKZTcan_02406_1s_mrna	hypothetical protein Tcan_02406 [Toxocara canis]	0	0	0	0	0	0.074917	0.609576	0.999592	0.00400443	-7.96419	down
Tcan_17141	gnlWGS:JPKZTcan_17141_1s_mrna	Tau-tubulin kinase 2 [Toxocara canis]	0	0	0	0	0.074569	0	0.495677	0.999592	0.00402312	-7.95747	down
Tcan_14924	gnlWGS:JPKZTcan_14924_1s_mrna	hypothetical protein Tcan_14924 [Toxocara canis]	0	0	0	0	0	0.072158	0.609576	0.999592	0.00415754	-7.91005	down
Tcan_06267	gnlWGS:JPKZTcan_06267_1s_mrna	hypothetical protein Tcan_06267 [Toxocara canis]	0	0	0	0	0	0.071199	0.506273	0.999592	0.00421354	-7.89075	down
Tcan_02497	gnlWGS:JPKZTcan_02497_1s_mrna	Cuticle collagen sqt-1 [Toxocara canis]	0	0	0	0	0.070897	0	0.495677	0.999592	0.00423149	-7.88462	down
Tcan_05868	gnlWGS:JPKZTcan_05868_1s_mrna	Tyrosine-protein kinase Fps85D [Toxocara canis]	0	0	0	0	0.070546	0	0.405162	0.999592	0.00425254	-7.87746	down
Tcan_06518	gnlWGS:JPKZTcan_06518_1s_mrna	hypothetical protein Tcan_06518 [Toxocara canis]	0	0	0	0.069138	0	0	0.662628	0.999592	0.00433915	-7.84837	down
Tcan_10580	gnlWGS:JPKZTcan_10580_1s_mrna	Ubiquitin-conjugating enzyme E2 2 [Toxocara canis]	0	0	0	0.067684	0	0	0.437143	0.999592	0.00443236	-7.81771	down
Tcan_11388	gnlWGS:JPKZTcan_11388_1s_mrna	Trehalase [Toxocara canis]	0	0	0	0.066263	0	0	0.662628	0.999592	0.00452741	-7.7871	down
Tcan_06462	gnlWGS:JPKZTcan_06462_1s_mrna	26S proteasome non-ATPase regulatory subunit 12 [Toxocara canis]	0	0	0	0	0.065459	0	0.444605	0.999592	0.00458302	-7.76949	down
Tcan_01486	gnlWGS:JPKZTcan_01486_1s_mrna	hypothetical protein Tcan_01486 [Toxocara canis]	0	0	0	0	0.064235	0	0.670946	0.999592	0.00467035	-7.74225	down
Tcan_11200	gnlWGS:JPKZTcan_11200_1s_mrna	Cuticlin-1 [Toxocara canis]	0	0	0	0	0.062743	0	0.495677	0.999592	0.00478141	-7.70835	down
Tcan_03395	gnlWGS:JPKZTcan_03395_1s_mrna	hypothetical protein Tcan_03395 [Toxocara canis]	0	0	0	0.061733	0	0	0.487868	0.999592	0.00485964	-7.68494	down
Tcan_14035	gnlWGS:JPKZTcan_14035_1s_mrna	hypothetical protein Tcan_14035 [Toxocara canis]	0	0	0	0	0	0.060445	0.439095	0.999592	0.00496319	-7.65452	down
Tcan_05699	gnlWGS:JPKZTcan_05699_1s_mrna	Inhibin beta E chain [Toxocara canis]	0	0	0	0	0.057812	0	0.565685	0.999592	0.00518923	-7.59026	down
Tcan_01854	gnlWGS:JPKZTcan_01854_1s_mrna	hypothetical protein Tcan_01854 [Toxocara canis]	0	0	0	0.057311	0	0	0.662628	0.999592	0.0052346	-7.57771	down
Tcan_12748	gnlWGS:JPKZTcan_12748_1s_mrna	hypothetical protein Tcan_12748 [Toxocara canis]	0	0	0	0.057311	0	0	0.662628	0.999592	0.0052346	-7.57771	down
Tcan_01105	gnlWGS:JPKZTcan_01105_1s_mrna	hypothetical protein Tcan_01105, partial [Toxocara canis]	0	0	0	0	0	0.055004	0.439095	0.999592	0.00545415	-7.51843	down
Tcan_05464	gnlWGS:JPKZTcan_05464_1s_mrna	hypothetical protein Tcan_05464 [Toxocara canis]	0	0	0	0	0.054804	0	0.495677	0.999592	0.00547405	-7.51317	down
Tcan_01804	gnlWGS:JPKZTcan_01804_1s_mrna	hypothetical protein Tcan_01804, partial [Toxocara canis]	0	0	0	0	0	0.054349	0.816155	0.999592	0.00551988	-7.50115	down
Tcan_08296	gnlWGS:JPKZTcan_08296_1s_mrna	hypothetical protein Tcan_08296 [Toxocara canis]	0	0	0	0	0.054199	0	0.816155	0.999592	0.00553516	-7.49716	down
Tcan_09266	gnlWGS:JPKZTcan_09266_1s_mrna	MOG interacting and ectopic P-granules protein 1 [Toxocara canis]	0	0	0	0.053904	0	0	0.662628	0.999592	0.00556545	-7.48929	down
Tcan_07165	gnlWGS:JPKZTcan_07165_1s_mrna	hypothetical protein Tcan_07165 [Toxocara canis]	0	0	0	0	0	0.053868	0.506273	0.999592	0.00556917	-7.48832	down
Tcan_16436	gnlWGS:JPKZTcan_16436_1s_mrna		0	0	0	0.004424	0.04099	0.008257	0.309753	0.999592	0.00558961	-7.48304	down
Tcan_02930	gnlWGS:JPKZTcan_02930_1s_mrna	Hemicentin-2 [Toxocara canis]	0	0	0	0	0.053119	0	0.495677	0.999592	0.0056477	-7.46812	down
Tcan_03881	gnlWGS:JPKZTcan_03881_1s_mrna	hypothetical protein Tcan_03881 [Toxocara canis]	0	0	0	0.052669	0	0	0.816155	0.999592	0.00569595	-7.45585	down
Tcan_04415	gnlWGS:JPKZTcan_04415_1s_mrna	hypothetical protein Tcan_04415 [Toxocara canis]	0	0	0	0	0.05239	0	0.495677	0.999592	0.00572628	-7.44819	down
Tcan_18099	gnlWGS:JPKZTcan_18099_1s_mrna	Tyrosine-protein kinase Fer [Toxocara canis]	0	0	0	0.051213	0	0	0.487868	0.999592	0.00585789	-7.4154	down
Tcan_00218	gnlWGS:JPKZTcan_00218_1s_mrna	Retrovirus-related Pol polyprotein from type-1 retrotransposable element R2 [Toxocara canis]	0	0	0	0	0	0.049121	0.609576	0.999592	0.00610737	-7.35523	down
Tcan_13450	gnlWGS:JPKZTcan_13450_1s_mrna	Ovochymase-1 [Toxocara canis]	0	0	0	0.048749	0	0	0.487868	0.999592	0.00615397	-7.34427	down
Tcan_10951	gnlWGS:JPKZTcan_10951_1s_mrna	hypothetical protein Tcan_10951 [Toxocara canis]	0	0	0	0	0.046824	0	0.816155	0.999592	0.00640697	-7.28614	down
Tcan_01534	gnlWGS:JPKZTcan_01534_1s_mrna	Presenilin -like protein, partial [Toxocara canis]	0	0	0	0	0	0.045653	0.816155	0.999592	0.00657131	-7.2496	down
Tcan_10413	gnlWGS:JPKZTcan_10413_1s_mrna	hypothetical protein Tcan_10413 [Toxocara canis]	0	0	0	0	0	0.045509	0.439095	0.999592	0.0065921	-7.24505	down
Tcan_11504	gnlWGS:JPKZTcan_11504_1s_mrna	hypothetical protein Tcan_11504 [Toxocara canis]	0	0	0	0.043517	0	0	0.816155	0.999592	0.00689386	-7.18047	down
Tcan_09239	gnlWGS:JPKZTcan_09239_1s_mrna	hypothetical protein Tcan_09239 [Toxocara canis]	0	0	0	0	0	0.043059	0.506273	0.999592	0.00696718	-7.16521	down
Tcan_11742	gnlWGS:JPKZTcan_11742_1s_mrna	Tyrosine-protein phosphatase Lar-like [Toxocara canis]	0	0	0	0	0.041059	0	0.565685	0.999592	0.00730656	-7.09659	down
Tcan_06755	gnlWGS:JPKZTcan_06755_1s_mrna	hypothetical protein Tcan_06755 [Toxocara canis]	0	0	0	0.040897	0	0	0.816155	0.999592	0.0073355	-7.09089	down
Tcan_13025	gnlWGS:JPKZTcan_13025_1s_mrna	Uncharacterized protein Tcan_13025 [Toxocara canis]	0	0	0	0.039203	0	0	0.28393	0.999592	0.00765248	-7.02986	down
Tcan_03404	gnlWGS:JPKZTcan_03404_1s_mrna	Ephrin type-A receptor 3 [Toxocara canis]	0	0	0	0.038794	0	0	0.557544	0.999592	0.00773315	-7.01473	down
Tcan_13176	gnlWGS:JPKZTcan_13176_1s_mrna	hypothetical protein Tcan_13176 [Toxocara canis]	0	0	0	0	0	0.037248	0.609576	0.999592	0.00805412	-6.95606	down
Tcan_04359	gnlWGS:JPKZTcan_04359_1s_mrna	Doublesex- and mab-3-related transcription factor 3 [Toxocara canis]	0	0	0	0	0.036262	0	0.565685	0.999592	0.00827312	-6.91735	down
Tcan_06827	gnlWGS:JPKZTcan_06827_1s_mrna	Tau-tubulin kinase 2 [Toxocara canis]	0	0	0	0	0.035707	0	0.670946	0.999592	0.00840171	-6.8951	down
Tcan_13116	gnlWGS:JPKZTcan_13116_1s_mrna	hypothetical protein Tcan_13116 [Toxocara canis]	0	0	0	0.033375	0	0	0.816155	0.999592	0.00898876	-6.79766	down
Tcan_09390	gnlWGS:JPKZTcan_09390_1s_mrna	hypothetical protein Tcan_09390 [Toxocara canis]	0	0	0	0.033106	0	0	0.36666	0.999592	0.0090618	-6.78599	down
Tcan_13014	gnlWGS:JPKZTcan_13014_1s_mrna	hypothetical protein Tcan_13014 [Toxocara canis]	0	0	0	0	0.032788	0	0.405162	0.999592	0.00914969	-6.77206	down
Tcan_07396	gnlWGS:JPKZTcan_07396_1s_mrna	hypothetical protein Tcan_07396 [Toxocara canis]	0	0	0	0.031562	0	0	0.662628	0.999592	0.0095051	-6.71708	down
Tcan_04950	gnlWGS:JPKZTcan_04950_1s_mrna	Serine/threonine-protein phosphatase PP1 isozyme 7 [Toxocara canis]	0	0	0	0	0	0.028994	0.506273	0.999592	0.010347	-6.59465	down
Tcan_03158	gnlWGS:JPKZTcan_03158_1s_mrna	putative enoyl-CoA hydratase, mitochondrial, partial [Toxocara canis]	0	0	0	0	0	0.02693	0.816155	0.999592	0.01114	-6.48811	down
Tcan_16853	gnlWGS:JPKZTcan_16853_1s_mrna	hypothetical protein Tcan_16853 [Toxocara canis]	0	0	0	0.02669	0	0	0.816155	0.999592	0.0112402	-6.47519	down
Tcan_01238	gnlWGS:JPKZTcan_01238_1s_mrna	hypothetical protein Tcan_01238, partial [Toxocara canis]	0	0	0	0	0.026321	0	0.816155	0.999592	0.0113977	-6.45511	down
Tcan_12258	gnlWGS:JPKZTcan_12258_1s_mrna	hypothetical protein Tcan_12258 [Toxocara canis]	0	0	0	0	0.026182	0	0.816155	0.999592	0.0114583	-6.44747	down
Tcan_14028	gnlWGS:JPKZTcan_14028_1s_mrna	O-acetyltransferase OatA [Toxocara canis]	0	0	0	0	0	0.024268	0.506273	0.999592	0.012362	-6.33795	down
Tcan_13659	gnlWGS:JPKZTcan_13659_1s_mrna	hypothetical protein Tcan_13659 [Toxocara canis]	0	0	0	0	0.023545	0	0.444605	0.999592	0.0127416	-6.29431	down
Tcan_01211	gnlWGS:JPKZTcan_01211_1s_mrna		0	0	0	0	0.02314	0	0.670946	0.999592	0.0129646	-6.26928	down
Tcan_16353	gnlWGS:JPKZTcan_16353_1s_mrna	hypothetical protein Tcan_16353 [Toxocara canis]	0.01594	0	0	0.031458	1.17653	0	0.0573531	0.999592	0.0131955	-6.24381	down
Tcan_05448	gnlWGS:JPKZTcan_05448_1s_mrna	Myosin-4 [Toxocara canis]	0	0	0	0	0.01279	0.009259	0.307085	0.999592	0.0136061	-6.19961	down
Tcan_18659	gnlWGS:JPKZTcan_18659_1s_mrna	Serpentine receptor class alpha/beta-14 [Toxocara canis]	0	0	0	0	0	0.0212	0.609576	0.999592	0.0141509	-6.14296	down
Tcan_13255	gnlWGS:JPKZTcan_13255_1s_mrna		0	0	0	0.020475	0	0	0.487868	0.999592	0.014652	-6.09276	down
Tcan_16666	gnlWGS:JPKZTcan_16666_1s_mrna	hypothetical protein Tcan_16666 [Toxocara canis]	0	0	0	0	0.006429	0.012409	0.296615	0.999592	0.0159253	-5.97254	down
Tcan_03665	gnlWGS:JPKZTcan_03665_1s_mrna	hypothetical protein Tcan_03665 [Toxocara canis]	0	0	0	0	0.017808	0	0.670946	0.999592	0.0168464	-5.89142	down
Tcan_11068	gnlWGS:JPKZTcan_11068_1s_mrna	hypothetical protein Tcan_11068 [Toxocara canis]	0	0	0	0	0.017449	0	0.816155	0.999592	0.017193	-5.86204	down
Tcan_08603	gnlWGS:JPKZTcan_08603_1s_mrna	hypothetical protein Tcan_08603 [Toxocara canis]	0	0	0	0	0.01248	0	0.565685	0.999592	0.0240385	-5.37851	down
Tcan_03171	gnlWGS:JPKZTcan_03171_1s_mrna	putative serine/threonine-protein kinase [Toxocara canis]	0	0	0	0	0.010748	0	0.816155	0.999592	0.0279122	-5.16296	down
Tcan_08166	gnlWGS:JPKZTcan_08166_1s_mrna	hypothetical protein Tcan_08166 [Toxocara canis]	0.014801	0	0	0.069312	0	0.448693	0.134193	0.999592	0.0285731	-5.1292	down
Tcan_17500	gnlWGS:JPKZTcan_17500_1s_mrna	Tau-tubulin kinase 1 [Toxocara canis]	0	0	0	0	0.0096	0	0.816155	0.999592	0.03125	-5	down
Tcan_10648	gnlWGS:JPKZTcan_10648_1s_mrna	A-kinase anchor protein 5 [Toxocara canis]	0	0	0	0	0.009232	0	0.816155	0.999592	0.0324957	-4.94361	down
Tcan_17779	gnlWGS:JPKZTcan_17779_1s_mrna	hypothetical protein Tcan_17779 [Toxocara canis]	0	0	0	0	0.007561	0	0.816155	0.999592	0.0396773	-4.65554	down
Tcan_16478	gnlWGS:JPKZTcan_16478_1s_mrna		0	0	0	0	0.006918	0	0.816155	0.999592	0.0433651	-4.52732	down
Tcan_01214	gnlWGS:JPKZTcan_01214_1s_mrna	hypothetical protein Tcan_01214, partial [Toxocara canis]	0	0.012072	0	0.11555	0.127217	0	0.360628	0.999592	0.0497267	-4.32984	down
Tcan_13344	gnlWGS:JPKZTcan_13344_1s_mrna		0	0	0	0	0.005174	0	0.670946	0.999592	0.0579822	-4.10825	down
Tcan_10672	gnlWGS:JPKZTcan_10672_1s_mrna		0.016972	0	0.015086	0.057767	0	0.475336	0.32165	0.999592	0.0601347	-4.05566	down
Tcan_15697	gnlWGS:JPKZTcan_15697_1s_mrna	hypothetical protein Tcan_15697 [Toxocara canis]	0	0	0.064743	0	0.508977	0.558146	0.0945756	0.999592	0.0606706	-4.04286	down
Tcan_02666	gnlWGS:JPKZTcan_02666_1s_mrna	hypothetical protein Tcan_02666 [Toxocara canis]	0	0	0.041607	0.080522	0.456855	0.090963	0.14436	0.999592	0.0662173	-3.91665	down
Tcan_02154	gnlWGS:JPKZTcan_02154_1s_mrna	hypothetical protein Tcan_02154 [Toxocara canis]	0	0.094316	0	0	0.532225	0.685892	0.150832	0.999592	0.0774277	-3.69101	down
Tcan_09848	gnlWGS:JPKZTcan_09848_1s_mrna	hypothetical protein Tcan_09848 [Toxocara canis]	0.078709	0	0	0.447419	0.164219	0.37414	0.094724	0.999592	0.0798445	-3.64666	down
Tcan_03130	gnlWGS:JPKZTcan_03130_1s_mrna	hypothetical protein Tcan_03130, partial [Toxocara canis]	0	0.060942	0	0.266904	0.266941	0.208108	0.0570204	0.999592	0.0821373	-3.60582	down
Tcan_12339	gnlWGS:JPKZTcan_12339_1s_mrna	hypothetical protein Tcan_12339 [Toxocara canis]	0	0	0.064353	0.374169	0.109226	0.20219	0.180657	0.999592	0.0938658	-3.41326	down
Tcan_05534	gnlWGS:JPKZTcan_05534_1s_mrna	unnamed protein product [Toxocara canis]	0	0	0.071711	0.192363	0.504735	0	0.276623	0.999592	0.102871	-3.2811	down
Tcan_00953	gnlWGS:JPKZTcan_00953_1s_mrna	hypothetical protein Tcan_00953, partial [Toxocara canis]	0.198788	0	0	0.219125	1.35976	0.316992	0.0617689	0.999592	0.104853	-3.25356	down
Tcan_11923	gnlWGS:JPKZTcan_11923_1s_mrna	Tyrosine-protein kinase Fps85D [Toxocara canis]	0	0.019245	0	0.065889	0.050752	0.064573	0.124051	0.999592	0.1062	-3.23514	down
Tcan_08012	gnlWGS:JPKZTcan_08012_1s_mrna	hypothetical protein Tcan_08012 [Toxocara canis]	0	0.018243	0	0	0.070506	0.090384	0.329197	0.999592	0.113388	-3.14066	down
Tcan_15567	gnlWGS:JPKZTcan_15567_1s_mrna	Paired box protein Pax-7 [Toxocara canis]	0	0	0.055617	0.167469	0.128943	0.183827	0.100697	0.999592	0.115811	-3.11015	down
Tcan_00978	gnlWGS:JPKZTcan_00978_1s_mrna	hypothetical protein Tcan_00978, partial [Toxocara canis]	0.101552	0	0	0.50318	0.23588	0.127705	0.0704377	0.999592	0.117162	-3.09342	down
Tcan_05450	gnlWGS:JPKZTcan_05450_1s_mrna	hypothetical protein Tcan_05450 [Toxocara canis]	0	0.036573	0	0.309247	0	0	0.570719	0.999592	0.118265	-3.07991	down
Tcan_00601	gnlWGS:JPKZTcan_00601_1s_mrna	hypothetical protein Tcan_00601, partial [Toxocara canis]	0.064892	0	0.082309	0.160491	0.134012	0.928014	0.11623	0.999592	0.120408	-3.054	down
Tcan_17873	gnlWGS:JPKZTcan_17873_1s_mrna	hypothetical protein Tcan_17873 [Toxocara canis]	0.153785	0	0	0.137031	1.1298	0	0.198734	0.999592	0.121393	-3.04224	down
Tcan_08281	gnlWGS:JPKZTcan_08281_1s_mrna	hypothetical protein Tcan_08281 [Toxocara canis]	0.32731	0	0	1.2855	0.84928	0.484332	0.0588432	0.999592	0.12497	-3.00035	down
Tcan_01558	gnlWGS:JPKZTcan_01558_1s_mrna	hypothetical protein Tcan_01558, partial [Toxocara canis]	0	0.054685	0	0.434574	0	0	0.570719	0.999592	0.125836	-2.99038	down
Tcan_16075	gnlWGS:JPKZTcan_16075_1s_mrna	hypothetical protein Tcan_16075 [Toxocara canis]	0	0.044361	0	0	0	0.349992	0.435564	0.999592	0.126749	-2.97996	down
Tcan_01667	gnlWGS:JPKZTcan_01667_1s_mrna	hypothetical protein Tcan_01667, partial [Toxocara canis]	0	0.244682	0	0.551455	0.884427	0.456649	0.0612277	0.999592	0.129288	-2.95134	down
Tcan_00264	gnlWGS:JPKZTcan_00264_1s_mrna	hypothetical protein Tcan_00264 [Toxocara canis]	0.046522	0	0.059406	0.31525	0.453136	0.041042	0.153233	0.999592	0.130868	-2.93382	down
Tcan_01230	gnlWGS:JPKZTcan_01230_1s_mrna	hypothetical protein Tcan_01230, partial [Toxocara canis]	0.044248	0	0	0.176665	0	0.1514	0.278404	0.999592	0.134876	-2.8903	down
Tcan_03315	gnlWGS:JPKZTcan_03315_1s_mrna	hypothetical protein Tcan_03315 [Toxocara canis]	0	0.2449	0	1.36185	0	0.440723	0.234655	0.999592	0.135862	-2.87979	down
Tcan_00073	gnlWGS:JPKZTcan_00073_1s_mrna	hypothetical protein Tcan_00073 [Toxocara canis]	0.043261	0	0.050473	0.036634	0.446119	0.182051	0.189609	0.999592	0.140995	-2.82628	down
Tcan_04321	gnlWGS:JPKZTcan_04321_1s_mrna	unnamed protein product [Toxocara canis]	0	0	0.063819	0.45231	0	0	0.472953	0.999592	0.141096	-2.82525	down
Tcan_01023	gnlWGS:JPKZTcan_01023_1s_mrna	hypothetical protein Tcan_01023, partial [Toxocara canis]	0	0.065242	0	0.461151	0	0	0.570719	0.999592	0.141476	-2.82137	down
Tcan_02293	gnlWGS:JPKZTcan_02293_1s_mrna	hypothetical protein Tcan_02293 [Toxocara canis]	0.034814	0	0.067695	0.42659	0	0.295744	0.275633	0.999592	0.141914	-2.81692	down
Tcan_06661	gnlWGS:JPKZTcan_06661_1s_mrna	hypothetical protein Tcan_06661 [Toxocara canis]	0	0	0.061284	0.112116	0	0.318469	0.350338	0.999592	0.142327	-2.81272	down
Tcan_00929	gnlWGS:JPKZTcan_00929_1s_mrna	hypothetical protein Tcan_00929, partial [Toxocara canis]	0.087489	0	0.046048	0.092416	0.500536	0.342664	0.0812041	0.999592	0.142726	-2.80868	down
Tcan_05737	gnlWGS:JPKZTcan_05737_1s_mrna	Serine/threonine-protein phosphatase PP1-gamma catalytic subunit [Toxocara canis]	0	0.041185	0	0.120931	0.166276	0	0.287753	0.999592	0.143398	-2.8019	down
Tcan_14714	gnlWGS:JPKZTcan_14714_1s_mrna	Putative fatty acid elongation protein 4 [Toxocara canis]	0	0.238286	0	0.601117	0.471539	0.579109	0.0612115	0.999592	0.144261	-2.79324	down
Tcan_03632	gnlWGS:JPKZTcan_03632_1s_mrna	hypothetical protein Tcan_03632 [Toxocara canis]	0	0	0.130197	0.389998	0.496458	0	0.39255	0.999592	0.146874	-2.76735	down
Tcan_01709	gnlWGS:JPKZTcan_01709_1s_mrna	hypothetical protein Tcan_01709, partial [Toxocara canis]	0	0	0.133803	0.65598	0.218609	0	0.393267	0.999592	0.15299	-2.70849	down
Tcan_01303	gnlWGS:JPKZTcan_01303_1s_mrna	Retrovirus-related Pol polyprotein from type-1 retrotransposable element R2, partial [Toxocara canis]	0.048129	0	0	0.027	0.169568	0.114917	0.212758	0.999592	0.154515	-2.69418	down
Tcan_18475	gnlWGS:JPKZTcan_18475_1s_mrna	putative quinone oxidoreductase [Toxocara canis]	0.068635	0	0	0.319761	0	0.118022	0.247657	0.999592	0.156779	-2.6732	down
Tcan_00356	gnlWGS:JPKZTcan_00356_1s_mrna	hypothetical protein Tcan_00356, partial [Toxocara canis]	0.294033	0	0	0.607207	1.20685	0	0.261083	0.999592	0.162086	-2.62517	down
Tcan_08722	gnlWGS:JPKZTcan_08722_1s_mrna	Protein UBASH3A -like protein [Toxocara canis]	0	0	0.148937	0.257234	0.228244	0.416969	0.155016	0.999592	0.165037	-2.59914	down
Tcan_09907	gnlWGS:JPKZTcan_09907_1s_mrna	hypothetical protein Tcan_09907 [Toxocara canis]	0	0.061648	0	0.273449	0.099439	0	0.280125	0.999592	0.165326	-2.59662	down
Tcan_00448	gnlWGS:JPKZTcan_00448_1s_mrna	hypothetical protein Tcan_00448, partial [Toxocara canis]	0.059641	0	0.094147	0.4205	0.382199	0.099554	0.137441	0.999592	0.170449	-2.55259	down
Tcan_08524	gnlWGS:JPKZTcan_08524_1s_mrna	hypothetical protein Tcan_08524, partial [Toxocara canis]	0.068892	0	0.089966	0.727244	0.12565	0.076694	0.118509	0.999592	0.170891	-2.54885	down
Tcan_11781	gnlWGS:JPKZTcan_11781_1s_mrna	hypothetical protein Tcan_11781, partial [Toxocara canis]	0.195125	0	0	0.238386	0.89653	0	0.240087	0.999592	0.171929	-2.54011	down
Tcan_11423	gnlWGS:JPKZTcan_11423_1s_mrna	hypothetical protein Tcan_11423 [Toxocara canis]	0.041833	0.033553	0	0.287168	0.14759	0	0.196327	0.999592	0.173398	-2.52784	down
Tcan_05713	gnlWGS:JPKZTcan_05713_1s_mrna	hypothetical protein Tcan_05713 [Toxocara canis]	0	0	0.136469	0.189457	0.22644	0.370145	0.18406	0.999592	0.173615	-2.52603	down
Tcan_18477	gnlWGS:JPKZTcan_18477_1s_mrna	hypothetical protein Tcan_18477, partial [Toxocara canis]	0	0	0.071908	0	0	0.414171	0.533806	0.999592	0.173619	-2.526	down
Tcan_02431	gnlWGS:JPKZTcan_02431_1s_mrna	hypothetical protein Tcan_02431 [Toxocara canis]	0	0	0.235083	1.13955	0.214299	0	0.403412	0.999592	0.173641	-2.52582	down
Tcan_00876	gnlWGS:JPKZTcan_00876_1s_mrna	hypothetical protein Tcan_00876, partial [Toxocara canis]	0.114264	0	0	0.087206	0.233281	0.330039	0.185408	0.999592	0.175649	-2.50924	down
Tcan_07807	gnlWGS:JPKZTcan_07807_1s_mrna	Receptor-type tyrosine-protein phosphatase zeta [Toxocara canis]	0.040684	0	0	0.142777	0.086772	0	0.281906	0.999592	0.177234	-2.49627	down
Tcan_03388	gnlWGS:JPKZTcan_03388_1s_mrna	Putative transporter [Toxocara canis]	0.033321	0	0	0.138809	0.04677	0	0.312564	0.999592	0.179552	-2.47753	down
Tcan_01130	gnlWGS:JPKZTcan_01130_1s_mrna	hypothetical protein Tcan_01130, partial [Toxocara canis]	0.031119	0.021562	0	0.083131	0.170751	0.038926	0.427541	0.999592	0.179917	-2.4746	down
Tcan_00570	gnlWGS:JPKZTcan_00570_1s_mrna	hypothetical protein Tcan_00570, partial [Toxocara canis]	0.05427	0.038978	0	0	0.518138	0	0.342014	0.999592	0.179967	-2.47419	down
Tcan_16321	gnlWGS:JPKZTcan_16321_1s_mrna	hypothetical protein Tcan_16321 [Toxocara canis]	0	0.136258	0	0.292449	0.463885	0	0.375442	0.999592	0.180156	-2.47268	down
Tcan_11595	gnlWGS:JPKZTcan_11595_1s_mrna	hypothetical protein Tcan_11595 [Toxocara canis]	0	0.254478	0	0.410565	0.978164	0	0.338254	0.999592	0.183245	-2.44815	down
Tcan_00177	gnlWGS:JPKZTcan_00177_1s_mrna	hypothetical protein Tcan_00177, partial [Toxocara canis]	0	0	0.056666	0.13309	0.069216	0.102364	0.437774	0.999592	0.185991	-2.42669	down
Tcan_00803	gnlWGS:JPKZTcan_00803_1s_mrna	hypothetical protein Tcan_00803, partial [Toxocara canis]	0.141158	0.081337	0	0.597112	0.513634	0.077517	0.15935	0.999592	0.187244	-2.41701	down
Tcan_17352	gnlWGS:JPKZTcan_17352_1s_mrna	hypothetical protein Tcan_17352 [Toxocara canis]	0.002737	0	0	0	0.008703	0.005844	0.799648	0.999592	0.188149	-2.41005	down
Tcan_06405	gnlWGS:JPKZTcan_06405_1s_mrna	hypothetical protein Tcan_06405 [Toxocara canis]	0	0	0.028359	0	0.15014	0	0.738251	0.999592	0.188884	-2.40443	down
Tcan_15639	gnlWGS:JPKZTcan_15639_1s_mrna	hypothetical protein Tcan_15639 [Toxocara canis]	0.051199	0	0	0.270383	0	0	0.571355	0.999592	0.189357	-2.40082	down
Tcan_01316	gnlWGS:JPKZTcan_01316_1s_mrna	hypothetical protein Tcan_01316, partial [Toxocara canis]	0	0.144738	0	0.365826	0.397449	0	0.421069	0.999592	0.189628	-2.39876	down
Tcan_12891	gnlWGS:JPKZTcan_12891_1s_mrna		0	0.015815	0	0.069423	0	0.013054	0.475963	0.999592	0.19175	-2.3827	down
Tcan_13236	gnlWGS:JPKZTcan_13236_1s_mrna	hypothetical protein Tcan_13236 [Toxocara canis]	0	0	0.257956	0	0.193059	1.13933	0.360606	0.999592	0.193604	-2.36882	down
Tcan_07475	gnlWGS:JPKZTcan_07475_1s_mrna	hypothetical protein Tcan_07475 [Toxocara canis]	0	1.38181	0	0	5.63596	1.42189	0.315766	0.999592	0.195784	-2.35267	down
Tcan_12914	gnlWGS:JPKZTcan_12914_1s_mrna	hypothetical protein Tcan_12914 [Toxocara canis]	0.096173	0.112787	0.048578	0.151839	0.642694	0.514501	0.193403	0.999592	0.196739	-2.34565	down
Tcan_09413	gnlWGS:JPKZTcan_09413_1s_mrna	hypothetical protein Tcan_09413 [Toxocara canis]	0.189051	0	0	0.412932	0.547164	0	0.325494	0.999592	0.196908	-2.3444	down
Tcan_08831	gnlWGS:JPKZTcan_08831_1s_mrna	hypothetical protein Tcan_08831 [Toxocara canis]	0.06282	0	0	0.064711	0.212602	0.040953	0.149924	0.999592	0.197382	-2.34094	down
Tcan_16400	gnlWGS:JPKZTcan_16400_1s_mrna	Cuticlin-1 [Toxocara canis]	0.048753	0	0	0	0	0.242532	0.421066	0.999592	0.201017	-2.31461	down
Tcan_04163	gnlWGS:JPKZTcan_04163_1s_mrna	hypothetical protein Tcan_04163 [Toxocara canis]	0.129031	0.136011	0	0.99896	0.231188	0.087272	0.117197	0.999592	0.201183	-2.31342	down
Tcan_12887	gnlWGS:JPKZTcan_12887_1s_mrna	EH domain-containing protein 4 [Toxocara canis]	0	0	0.122334	0	0.606354	0	0.685124	0.999592	0.201753	-2.30933	down
Tcan_02199	gnlWGS:JPKZTcan_02199_1s_mrna	unnamed protein product [Toxocara canis]	0	0.084722	0	0	0.413235	0	0.568795	0.999592	0.205021	-2.28615	down
Tcan_01690	gnlWGS:JPKZTcan_01690_1s_mrna	hypothetical protein Tcan_01690, partial [Toxocara canis]	0.235726	0	0	0.467558	0.524013	0.149731	0.174034	0.999592	0.206541	-2.2755	down
Tcan_02274	gnlWGS:JPKZTcan_02274_1s_mrna	unnamed protein product [Toxocara canis]	0.270999	0	0	0.90936	0.381681	0	0.326175	0.999592	0.209907	-2.25218	down
Tcan_00859	gnlWGS:JPKZTcan_00859_1s_mrna	hypothetical protein Tcan_00858, partial [Toxocara canis]	0.002963	0.079276	0.100324	0.567135	0	0.291585	0.380662	0.999592	0.212599	-2.23379	down
Tcan_03862	gnlWGS:JPKZTcan_03862_1s_mrna	hypothetical protein Tcan_03862 [Toxocara canis]	0	0	0.030772	0	0.144616	0	0.681829	0.999592	0.212784	-2.23254	down
Tcan_10209	gnlWGS:JPKZTcan_10209_1s_mrna	hypothetical protein Tcan_10209 [Toxocara canis]	0.07465	0	0	0	0.350251	0	0.625991	0.999592	0.213133	-2.23018	down
Tcan_13188	gnlWGS:JPKZTcan_13188_1s_mrna	hypothetical protein Tcan_13188 [Toxocara canis]	0.118584	0	0	0	0.553604	0	0.625991	0.999592	0.214204	-2.22295	down
Tcan_00571	gnlWGS:JPKZTcan_00571_1s_mrna	hypothetical protein Tcan_00571, partial [Toxocara canis]	0	0	0.124275	0.258056	0	0.319286	0.404651	0.999592	0.215254	-2.21589	down
Tcan_15713	gnlWGS:JPKZTcan_15713_1s_mrna	hypothetical protein Tcan_15713 [Toxocara canis]	0	0	0.138172	0	0.638694	0	0.681829	0.999592	0.216335	-2.20866	down
Tcan_13381	gnlWGS:JPKZTcan_13381_1s_mrna	hypothetical protein Tcan_13381 [Toxocara canis]	0	0.138568	0.209574	1.10226	0.485458	0	0.328468	0.999592	0.219272	-2.18921	down
Tcan_07776	gnlWGS:JPKZTcan_07776_1s_mrna		0	0.219233	0	0.76913	0.224839	0	0.409284	0.999592	0.220563	-2.18074	down
Tcan_08736	gnlWGS:JPKZTcan_08736_1s_mrna	hypothetical protein Tcan_08736 [Toxocara canis]	0	0.163342	0	0.308024	0.327221	0.104283	0.253455	0.999592	0.220873	-2.17871	down
Tcan_09735	gnlWGS:JPKZTcan_09735_1s_mrna	hypothetical protein Tcan_09735, partial [Toxocara canis]	0	0.045073	0.048794	0.196682	0.099137	0.128916	0.0953044	0.999592	0.221001	-2.17787	down
Tcan_08688	gnlWGS:JPKZTcan_08688_1s_mrna	hypothetical protein Tcan_08688 [Toxocara canis]	0.09326	0	0	0	0.232391	0.188337	0.472688	0.999592	0.221663	-2.17356	down
Tcan_13274	gnlWGS:JPKZTcan_13274_1s_mrna	hypothetical protein Tcan_13274 [Toxocara canis]	0	0.343527	0	0.592279	0.953111	0	0.373215	0.999592	0.222291	-2.16948	down
Tcan_01028	gnlWGS:JPKZTcan_01028_1s_mrna	hypothetical protein Tcan_01028, partial [Toxocara canis]	0	0.05688	0	0	0.197958	0.057397	0.442423	0.999592	0.222749	-2.16651	down
Tcan_08013	gnlWGS:JPKZTcan_08013_1s_mrna	hypothetical protein Tcan_08013 [Toxocara canis]	0.255311	0.027503	0.038744	0.172879	0.73736	0.526301	0.0633119	0.999592	0.223842	-2.15945	down
Tcan_08823	gnlWGS:JPKZTcan_08823_1s_mrna	hypothetical protein Tcan_08823 [Toxocara canis]	0.070914	0	0.050943	0.226541	0.021954	0.291867	0.197687	0.999592	0.22551	-2.14874	down
Tcan_04805	gnlWGS:JPKZTcan_04805_1s_mrna	Protein UBASH3A -like protein [Toxocara canis]	0	0.130847	0.114253	0.517957	0.177791	0.379765	0.0842199	0.999592	0.227891	-2.13358	down
Tcan_00816	gnlWGS:JPKZTcan_00816_1s_mrna	hypothetical protein Tcan_00816, partial [Toxocara canis]	0	0	0.046314	0	0	0.201889	0.595363	0.999592	0.229403	-2.12404	down
Tcan_09667	gnlWGS:JPKZTcan_09667_1s_mrna	hypothetical protein Tcan_09667 [Toxocara canis]	0	0	0.318144	1.06911	0	0.312848	0.47219	0.999592	0.230212	-2.11896	down
Tcan_03890	gnlWGS:JPKZTcan_03890_1s_mrna	hypothetical protein Tcan_03890 [Toxocara canis]	0.11191	0	0.292096	0.543063	0.555267	0.646227	0.0918182	0.999592	0.231581	-2.11041	down
Tcan_16868	gnlWGS:JPKZTcan_16868_1s_mrna	hypothetical protein Tcan_16868 [Toxocara canis]	0	0	0.415717	0.544757	1.23664	0	0.520981	0.999592	0.233365	-2.09934	down
Tcan_16347	gnlWGS:JPKZTcan_16347_1s_mrna	hypothetical protein Tcan_16347 [Toxocara canis]	0	0.037499	0	0.049427	0.110627	0	0.556797	0.999592	0.23429	-2.09363	down
Tcan_03477	gnlWGS:JPKZTcan_03477_1s_mrna	Neprilysin-2 [Toxocara canis]	0	0.015368	0	0.048701	0	0.016705	0.427117	0.999592	0.234963	-2.08949	down
Tcan_15788	gnlWGS:JPKZTcan_15788_1s_mrna	hypothetical protein Tcan_15788, partial [Toxocara canis]	0.105091	0	0	0.158577	0.268538	0.0195	0.250034	0.999592	0.235306	-2.08739	down
Tcan_01568	gnlWGS:JPKZTcan_01568_1s_mrna	hypothetical protein Tcan_01568, partial [Toxocara canis]	0	0.756294	0.246598	1.02913	2.13534	1.07541	0.0825236	0.999592	0.236538	-2.07986	down
Tcan_09795	gnlWGS:JPKZTcan_09795_1s_mrna	hypothetical protein Tcan_09795 [Toxocara canis]	0	0.309042	0	0	1.13121	0.175203	0.486503	0.999592	0.236557	-2.07974	down
Tcan_12497	gnlWGS:JPKZTcan_12497_1s_mrna	hypothetical protein Tcan_12497 [Toxocara canis]	0	0.118659	0	0	0	0.500201	0.500391	0.999592	0.237223	-2.07569	down
Tcan_01251	gnlWGS:JPKZTcan_01251_1s_mrna	hypothetical protein Tcan_01251, partial [Toxocara canis]	0.582177	0.121077	0.050402	2.15141	0.418171	0.606071	0.0820609	0.999592	0.237323	-2.07507	down
Tcan_12155	gnlWGS:JPKZTcan_12155_1s_mrna	hypothetical protein Tcan_12155 [Toxocara canis]	0.05574	0	0	0	0.157817	0.076372	0.426015	0.999592	0.238013	-2.07089	down
Tcan_15232	gnlWGS:JPKZTcan_15232_1s_mrna	hypothetical protein Tcan_15232 [Toxocara canis]	0	0	1.6199	2.85439	2.08015	1.8278	0.296873	0.999592	0.239547	-2.06162	down
Tcan_15175	gnlWGS:JPKZTcan_15175_1s_mrna	Neuronal acetylcholine receptor subunit eat-2 [Toxocara canis]	0	0.131733	0	0.156286	0.154555	0.23868	0.232589	0.999592	0.239723	-2.06056	down
Tcan_02491	gnlWGS:JPKZTcan_02491_1s_mrna	hypothetical protein Tcan_02491 [Toxocara canis]	0	0	0.191408	0	0	0.797304	0.622666	0.999592	0.240069	-2.05848	down
Tcan_18468	gnlWGS:JPKZTcan_18468_1s_mrna	hypothetical protein Tcan_18468 [Toxocara canis]	0	0	0.170592	0.254928	0.453105	0	0.64584	0.999592	0.240938	-2.05327	down
Tcan_10604	gnlWGS:JPKZTcan_10604_1s_mrna	hypothetical protein Tcan_10604 [Toxocara canis]	0.118603	0	0	0	0.491455	0	0.649918	0.999592	0.24133	-2.05092	down
Tcan_05882	gnlWGS:JPKZTcan_05882_1s_mrna	Spindle- and centromere-associated protein [Toxocara canis]	0.019972	0	0	0.03449	0.026617	0.021411	0.207575	0.999592	0.242032	-2.04673	down
Tcan_16099	gnlWGS:JPKZTcan_16099_1s_mrna	hypothetical protein Tcan_16099 [Toxocara canis]	0	0.041447	0.018816	0.080795	0.086666	0.079177	0.0967378	0.999592	0.244338	-2.03305	down
Tcan_02090	gnlWGS:JPKZTcan_02090_1s_mrna	hypothetical protein Tcan_02090 [Toxocara canis]	0	0	0.096969	0	0.395856	0	0.688917	0.999592	0.24496	-2.02938	down
Tcan_02194	gnlWGS:JPKZTcan_02194_1s_mrna	hypothetical protein Tcan_02194 [Toxocara canis]	0.085707	0	0.298993	0.645018	0.709091	0.212866	0.25899	0.999592	0.245505	-2.02618	down
Tcan_06592	gnlWGS:JPKZTcan_06592_1s_mrna	Pyruvate dehydrogenase E1 component subunit beta, mitochondrial [Toxocara canis]	0	0	0.053097	0	0.216031	0	0.709613	0.999592	0.245784	-2.02454	down
Tcan_17513	gnlWGS:JPKZTcan_17513_1s_mrna	hypothetical protein Tcan_17513 [Toxocara canis]	0	0.049239	0	0	0	0.199962	0.595363	0.999592	0.246242	-2.02185	down
Tcan_01956	gnlWGS:JPKZTcan_01956_1s_mrna	hypothetical protein Tcan_01956 [Toxocara canis]	0.45857	0	0	0.670984	1.18363	0	0.374359	0.999592	0.24726	-2.0159	down
Tcan_11823	gnlWGS:JPKZTcan_11823_1s_mrna	Glycogen synthase kinase-3 [Toxocara canis]	0.084402	0	0.048331	0.224812	0.310401	0	0.339444	0.999592	0.248	-2.01159	down
Tcan_12380	gnlWGS:JPKZTcan_12380_1s_mrna	hypothetical protein Tcan_12380 [Toxocara canis]	0.207585	0	0	0.244977	0.458533	0.129384	0.217272	0.999592	0.249233	-2.00443	down
Tcan_15306	gnlWGS:JPKZTcan_15306_1s_mrna	hypothetical protein Tcan_15306 [Toxocara canis]	0.265182	0.225565	0	0.431378	1.5282	0	0.322276	0.999592	0.250435	-1.99749	down
Tcan_03898	gnlWGS:JPKZTcan_03898_1s_mrna	hypothetical protein Tcan_03898 [Toxocara canis]	0.452959	0	0	0.864432	0.556589	0.365997	0.258096	0.999592	0.253472	-1.9801	down
Tcan_16502	gnlWGS:JPKZTcan_16502_1s_mrna	Protein Wnt-2 [Toxocara canis]	0	0	0.193608	0.342362	0.417671	0	0.519256	0.999592	0.254736	-1.97292	down
Tcan_17154	gnlWGS:JPKZTcan_17154_1s_mrna	Tau-tubulin kinase 2 [Toxocara canis]	0.308964	0	0	0.402336	0.703155	0.103214	0.225973	0.999592	0.255616	-1.96795	down
Tcan_12928	gnlWGS:JPKZTcan_12928_1s_mrna	Xaa-Pro dipeptidase [Toxocara canis]	0.088276	0	0	0	0.239953	0.104104	0.369399	0.999592	0.256574	-1.96255	down
Tcan_02296	gnlWGS:JPKZTcan_02296_1s_mrna	Glycine receptor subunit beta-type 4 [Toxocara canis]	0.659861	0	1.29159	3.95908	2.78687	0.851086	0.144371	0.999592	0.256871	-1.96089	down
Tcan_00806	gnlWGS:JPKZTcan_00806_1s_mrna	unnamed protein product [Toxocara canis]	0.459985	0	0	0.952523	0	0.834642	0.370888	0.999592	0.257383	-1.95801	down
Tcan_03217	gnlWGS:JPKZTcan_03217_1s_mrna	Cytochrome b-c1 complex subunit Rieske, mitochondrial [Toxocara canis]	0.150291	0	0	0.268369	0	0.314637	0.447552	0.999592	0.257786	-1.95575	down
Tcan_01332	gnlWGS:JPKZTcan_01332_1s_mrna	Sucrase-isomaltase, intestinal, partial [Toxocara canis]	0	0	0.12213	0	0	0.471576	0.60021	0.999592	0.258983	-1.94907	down
Tcan_00550	gnlWGS:JPKZTcan_00550_1s_mrna	hypothetical protein Tcan_00550, partial [Toxocara canis]	0.134479	0	0	0.493848	0	0.025332	0.50225	0.999592	0.259022	-1.94885	down
Tcan_07844	gnlWGS:JPKZTcan_07844_1s_mrna	hypothetical protein Tcan_07844 [Toxocara canis]	0	0	0.33126	0	1.26862	0	0.646692	0.999592	0.261118	-1.93723	down
Tcan_18805	gnlWGS:JPKZTcan_18805_1s_mrna	hypothetical protein Tcan_18805 [Toxocara canis]	0.095041	0	0	0	0.363074	0	0.559942	0.999592	0.261768	-1.93364	down
Tcan_00495	gnlWGS:JPKZTcan_00495_1s_mrna	hypothetical protein Tcan_00495, partial [Toxocara canis]	0.214267	0.076491	0	0	1.0087	0.101904	0.449253	0.999592	0.261801	-1.93346	down
Tcan_16033	gnlWGS:JPKZTcan_16033_1s_mrna	Protein lin-12 [Toxocara canis]	0	0.024767	0	0.06843	0.025066	0	0.476897	0.999592	0.264899	-1.91649	down
Tcan_11901	gnlWGS:JPKZTcan_11901_1s_mrna	hypothetical protein Tcan_11901 [Toxocara canis]	0	0	0.181321	0.493521	0.188908	0	0.542712	0.999592	0.265699	-1.91213	down
Tcan_04980	gnlWGS:JPKZTcan_04980_1s_mrna	hypothetical protein Tcan_04980 [Toxocara canis]	0	0.161868	0	0.322019	0.084556	0.201671	0.274985	0.999592	0.266123	-1.90984	down
Tcan_13174	gnlWGS:JPKZTcan_13174_1s_mrna	Homeobox protein ceh-18 [Toxocara canis]	0	0.060944	0	0.148451	0	0.080401	0.495515	0.999592	0.266303	-1.90886	down
Tcan_02740	gnlWGS:JPKZTcan_02740_1s_mrna	Serine/threonine-protein phosphatase 2A 65 kDa regulatory subunit A beta isoform [Toxocara canis]	0.033542	0	0	0.027352	0	0.098232	0.453148	0.999592	0.267088	-1.90461	down
Tcan_09176	gnlWGS:JPKZTcan_09176_1s_mrna	Ubiquitin-conjugating enzyme E2 2 [Toxocara canis]	0	0	0.090442	0.337838	0	0	0.749061	0.999592	0.267708	-1.90127	down
Tcan_09618	gnlWGS:JPKZTcan_09618_1s_mrna	Innexin-3 [Toxocara canis]	0.039031	0.073309	0	0.13335	0.126354	0.158984	0.10434	0.999592	0.268314	-1.898	down
Tcan_00103	gnlWGS:JPKZTcan_00103_1s_mrna	hypothetical protein Tcan_00103 [Toxocara canis]	0.131393	0.433255	0.178846	0.7756	1.63976	0.347715	0.0565392	0.999592	0.269082	-1.89388	down
Tcan_16935	gnlWGS:JPKZTcan_16935_1s_mrna	hypothetical protein Tcan_16935 [Toxocara canis]	0	0.066837	0	0.151807	0	0.096078	0.491962	0.999592	0.269629	-1.89095	down
Tcan_08413	gnlWGS:JPKZTcan_08413_1s_mrna	hypothetical protein Tcan_08413 [Toxocara canis]	0.148368	0.255819	0	0.081694	0.797485	0.617263	0.201191	0.999592	0.270099	-1.88844	down
Tcan_00949	gnlWGS:JPKZTcan_00949_1s_mrna	hypothetical protein Tcan_00949, partial [Toxocara canis]	0.123359	0.190811	0.389417	0.822954	1.27816	0.494003	0.102765	0.999592	0.27112	-1.883	down
Tcan_07703	gnlWGS:JPKZTcan_07703_1s_mrna	hypothetical protein Tcan_07703 [Toxocara canis]	0	0	0.39635	1.0626	0.395498	0	0.550644	0.999592	0.271826	-1.87924	down
Tcan_13192	gnlWGS:JPKZTcan_13192_1s_mrna	hypothetical protein Tcan_13192 [Toxocara canis]	0.153864	0	0.265462	0.216065	0.756986	0.5624	0.296799	0.999592	0.273096	-1.87252	down
Tcan_05270	gnlWGS:JPKZTcan_05270_1s_mrna	hypothetical protein Tcan_05270, partial [Toxocara canis]	0.126706	0	0.138877	0.123093	0.328303	0.518671	0.20178	0.999592	0.273778	-1.86892	down
Tcan_08744	gnlWGS:JPKZTcan_08744_1s_mrna	hypothetical protein Tcan_08744 [Toxocara canis]	0.280284	0.04652	0.050006	0.660286	0.572536	0.136448	0.089175	0.999592	0.27519	-1.8615	down
Tcan_00423	gnlWGS:JPKZTcan_00423_1s_mrna	Uncharacterized protein T05H10.3, partial [Toxocara canis]	0.216786	0	0	0.469862	0	0.317742	0.43514	0.999592	0.275247	-1.8612	down
Tcan_11486	gnlWGS:JPKZTcan_11486_1s_mrna	hypothetical protein Tcan_11486 [Toxocara canis]	0	0	0.148367	0	0.538308	0	0.73895	0.999592	0.275617	-1.85926	down
Tcan_01998	gnlWGS:JPKZTcan_01998_1s_mrna	Nuclear hormone receptor family member nhr-69, partial [Toxocara canis]	0.340416	0	0	0.579968	0.419409	0.232886	0.231283	0.999592	0.276253	-1.85594	down
Tcan_13382	gnlWGS:JPKZTcan_13382_1s_mrna	hypothetical protein Tcan_13382 [Toxocara canis]	0	0	1.65638	2.42535	3.54634	0	0.54814	0.999592	0.277373	-1.8501	down
Tcan_04107	gnlWGS:JPKZTcan_04107_1s_mrna	hypothetical protein Tcan_04107 [Toxocara canis]	0	0.23829	0	0.420703	0	0.427519	0.396365	0.999592	0.280929	-1.83172	down
Tcan_10969	gnlWGS:JPKZTcan_10969_1s_mrna	hypothetical protein Tcan_10969 [Toxocara canis]	0	0.2307	0	0.315432	0.505239	0	0.475196	0.999592	0.281111	-1.83079	down
Tcan_08491	gnlWGS:JPKZTcan_08491_1s_mrna	hypothetical protein Tcan_08491 [Toxocara canis]	0.278662	0	0	0.243859	0.401675	0.341373	0.237845	0.999592	0.282359	-1.8244	down
Tcan_09968	gnlWGS:JPKZTcan_09968_1s_mrna	hypothetical protein Tcan_09968 [Toxocara canis]	0	0	0.38132	0.822725	0	0.523877	0.564005	0.999592	0.283172	-1.82025	down
Tcan_02962	gnlWGS:JPKZTcan_02962_1s_mrna	Spindle- and centromere-associated protein [Toxocara canis]	0.238825	0.0658	0	0.284982	0.745333	0.042175	0.196176	0.999592	0.284035	-1.81586	down
Tcan_01345	gnlWGS:JPKZTcan_01345_1s_mrna	hypothetical protein Tcan_01345, partial [Toxocara canis]	0	0.254941	0.335411	0.842814	1.07225	0.156839	0.23959	0.999592	0.284932	-1.81131	down
Tcan_07715	gnlWGS:JPKZTcan_07715_1s_mrna	Mitogen-activated protein kinase mpk-1 [Toxocara canis]	0	0.186142	0.107142	0.423512	0.26332	0.334406	0.177828	0.999592	0.287185	-1.79995	down
Tcan_03013	gnlWGS:JPKZTcan_03013_1s_mrna	GATA-binding factor A [Toxocara canis]	0.048819	0.1236	0.235463	0.602678	0.450459	0.362598	0.0642542	0.999592	0.288106	-1.79533	down
Tcan_18756	gnlWGS:JPKZTcan_18756_1s_mrna	putative transposon TX1 [Toxocara canis]	0	0.183458	0	0.166637	0.173953	0.293326	0.27676	0.999592	0.289404	-1.78884	down
Tcan_13038	gnlWGS:JPKZTcan_13038_1s_mrna	hypothetical protein Tcan_13038 [Toxocara canis]	0.247917	0	0	0.273197	0.58092	0	0.420255	0.999592	0.290261	-1.78458	down
Tcan_13758	gnlWGS:JPKZTcan_13758_1s_mrna	hypothetical protein Tcan_08744 [Toxocara canis]	0.350759	0.04652	0.050006	0.745861	0.609499	0.180203	0.0986829	0.999592	0.291284	-1.7795	down
Tcan_00374	gnlWGS:JPKZTcan_00374_1s_mrna	Calmodulin, partial [Toxocara canis]	0	0	0.143918	0.120432	0.372877	0	0.584259	0.999592	0.29174	-1.77724	down
Tcan_18930	gnlWGS:JPKZTcan_18930_1s_mrna	hypothetical protein Tcan_18930 [Toxocara canis]	0.022339	0.023246	0.062551	0.147809	0.09549	0.12659	0.144941	0.999592	0.292347	-1.77425	down
Tcan_07918	gnlWGS:JPKZTcan_07918_1s_mrna	hypothetical protein Tcan_07918 [Toxocara canis]	0	0	0.300973	0	0	1.02566	0.686128	0.999592	0.293444	-1.76884	down
Tcan_14941	gnlWGS:JPKZTcan_14941_1s_mrna	hypothetical protein Tcan_14941 [Toxocara canis]	0.08927	0	0	0	0.304165	0	0.731104	0.999592	0.293492	-1.76861	down
Tcan_03624	gnlWGS:JPKZTcan_03624_1s_mrna	Serine/threonine-protein kinase-transforming protein mos, partial [Toxocara canis]	0.255353	0.213002	0	0.981097	0.294952	0.311772	0.186565	0.999592	0.294967	-1.76137	down
Tcan_01373	gnlWGS:JPKZTcan_01373_1s_mrna	SET domain-containing protein 14 [Toxocara canis]	0.033526	0	0	0.070666	0.042113	0	0.688513	0.999592	0.297272	-1.75015	down
Tcan_00863	gnlWGS:JPKZTcan_00863_1s_mrna	hypothetical protein Tcan_00863, partial [Toxocara canis]	0.087194	0	0.029792	0.153858	0.067653	0.172021	0.396297	0.999592	0.297272	-1.75015	down
Tcan_00984	gnlWGS:JPKZTcan_00984_1s_mrna	Craniofacial development protein 2, partial [Toxocara canis]	0	0	0.047017	0.052814	0.105335	0	0.64584	0.999592	0.297296	-1.75003	down
Tcan_14031	gnlWGS:JPKZTcan_14031_1s_mrna	hypothetical protein Tcan_14031 [Toxocara canis]	0	0.046224	0.022362	0.069359	0.122035	0.038845	0.297804	0.999592	0.29789	-1.74715	down
Tcan_12093	gnlWGS:JPKZTcan_12093_1s_mrna	hypothetical protein Tcan_12093 [Toxocara canis]	0.123621	0	0	0	0.145441	0.267271	0.516815	0.999592	0.299533	-1.73921	down
Tcan_08787	gnlWGS:JPKZTcan_08787_1s_mrna	hypothetical protein Tcan_08787 [Toxocara canis]	0	0	0.043925	0	0.146478	0	0.794681	0.999592	0.299874	-1.73757	down
Tcan_12050	gnlWGS:JPKZTcan_12050_1s_mrna	hypothetical protein Tcan_12050 [Toxocara canis]	0	0.190964	0	0.391228	0.207655	0.037409	0.345693	0.999592	0.30012	-1.73639	down
Tcan_14939	gnlWGS:JPKZTcan_14939_1s_mrna	hypothetical protein Tcan_14939 [Toxocara canis]	0.161537	0	0	0.361232	0	0.175706	0.546815	0.999592	0.300849	-1.73289	down
Tcan_04365	gnlWGS:JPKZTcan_04365_1s_mrna	hypothetical protein Tcan_04365 [Toxocara canis]	0.236334	0	0	0.182093	0.354674	0.245501	0.319415	0.999592	0.302114	-1.72684	down
Tcan_00564	gnlWGS:JPKZTcan_00564_1s_mrna	hypothetical protein Tcan_00564, partial [Toxocara canis]	0.130681	0.134084	0.337407	0.739324	0.907385	0.340585	0.127704	0.999592	0.303011	-1.72256	down
Tcan_00718	gnlWGS:JPKZTcan_00718_1s_mrna	hypothetical protein Tcan_00718, partial [Toxocara canis]	0.088253	0.951187	0.405522	0.678826	2.01711	2.05801	0.0958051	0.999592	0.30395	-1.71809	down
Tcan_00734	gnlWGS:JPKZTcan_00734_1s_mrna	hypothetical protein Tcan_00734, partial [Toxocara canis]	0.46376	0.009766	0	0.193109	1.26528	0.092688	0.344115	0.999592	0.305288	-1.71176	down
Tcan_04181	gnlWGS:JPKZTcan_04181_1s_mrna	hypothetical protein Tcan_04181 [Toxocara canis]	0.558243	0.324617	0	1.05517	1.06054	0.765951	0.137306	0.999592	0.306371	-1.70665	down
Tcan_00114	gnlWGS:JPKZTcan_00114_1s_mrna	hypothetical protein Tcan_00114, partial [Toxocara canis]	0.049013	0	0	0.158762	0	0	0.729295	0.999592	0.30872	-1.69563	down
Tcan_03572	gnlWGS:JPKZTcan_03572_1s_mrna	hypothetical protein Tcan_03572 [Toxocara canis]	0.200673	0	0	0.164572	0.176771	0.306732	0.287794	0.999592	0.309645	-1.69131	down
Tcan_13873	gnlWGS:JPKZTcan_13873_1s_mrna	hypothetical protein Tcan_13873 [Toxocara canis]	0.203818	0.12363	0	0.368621	0.686186	0	0.361031	0.999592	0.310434	-1.68764	down
Tcan_04083	gnlWGS:JPKZTcan_04083_1s_mrna	hypothetical protein Tcan_04083 [Toxocara canis]	0.048146	0	0	0.094016	0	0.06103	0.687386	0.999592	0.310527	-1.68721	down
Tcan_11425	gnlWGS:JPKZTcan_11425_1s_mrna	Uncharacterized protein R05D3.5 [Toxocara canis]	0	0.015956	0.023873	0.071932	0.056126	0	0.64687	0.999592	0.311023	-1.68491	down
Tcan_03074	gnlWGS:JPKZTcan_03074_1s_mrna	hypothetical protein Tcan_03074, partial [Toxocara canis]	0.312059	0	0	0.45632	0.542113	0	0.484799	0.999592	0.312549	-1.67785	down
Tcan_00755	gnlWGS:JPKZTcan_00755_1s_mrna	hypothetical protein Tcan_00755, partial [Toxocara canis]	0.287989	0.383208	0.111845	0.930988	1.32324	0.251108	0.0807871	0.999592	0.31255	-1.67784	down
Tcan_13899	gnlWGS:JPKZTcan_13899_1s_mrna	hypothetical protein Tcan_13899 [Toxocara canis]	0	0	0.191578	0.353591	0	0.257808	0.561033	0.999592	0.313344	-1.67418	down
Tcan_09951	gnlWGS:JPKZTcan_09951_1s_mrna	hypothetical protein Tcan_09951 [Toxocara canis]	0.063893	0	0	0.203056	0	0	0.65196	0.999592	0.314657	-1.66815	down
Tcan_14728	gnlWGS:JPKZTcan_14728_1s_mrna	hypothetical protein Tcan_14728 [Toxocara canis]	0	0.702609	0.373475	1.45155	0.873696	1.09255	0.194348	0.999592	0.314848	-1.66727	down
Tcan_18500	gnlWGS:JPKZTcan_18500_1s_mrna	Uncharacterized protein Tcan_18500 [Toxocara canis]	0.167453	0.229001	0	0.591086	0.668045	0	0.343397	0.999592	0.314863	-1.6672	down
Tcan_12933	gnlWGS:JPKZTcan_12933_1s_mrna	hypothetical protein Tcan_12933 [Toxocara canis]	0.151216	0	0.373876	0.565853	0.744579	0.356315	0.253984	0.999592	0.31504	-1.66639	down
Tcan_12100	gnlWGS:JPKZTcan_12100_1s_mrna	hypothetical protein Tcan_12100 [Toxocara canis]	0.407943	0	0	0.795048	0.497435	0	0.472118	0.999592	0.315627	-1.66371	down
Tcan_01655	gnlWGS:JPKZTcan_01655_1s_mrna	hypothetical protein Tcan_01655, partial [Toxocara canis]	0	0.145183	0	0.249704	0	0.207129	0.560385	0.999592	0.317803	-1.65379	down
Tcan_12643	gnlWGS:JPKZTcan_12643_1s_mrna	hypothetical protein Tcan_12643 [Toxocara canis]	8.48222	0	0	8.39311	8.90299	9.3445	0.503248	0.999592	0.318395	-1.65111	down
Tcan_03234	gnlWGS:JPKZTcan_03234_1s_mrna	Tau-tubulin kinase 2 [Toxocara canis]	0.063704	0.162389	0	0.173903	0.332967	0.202717	0.168798	0.999592	0.318626	-1.65006	down
Tcan_13981	gnlWGS:JPKZTcan_13981_1s_mrna	hypothetical protein Tcan_13981 [Toxocara canis]	0.085284	0	0.247162	0.108639	0.12563	0.808859	0.329292	0.999592	0.318701	-1.64972	down
Tcan_15702	gnlWGS:JPKZTcan_15702_1s_mrna	hypothetical protein Tcan_15702 [Toxocara canis]	0	0.333053	0	0.846572	0.196546	0	0.53874	0.999592	0.319286	-1.64708	down
Tcan_01937	gnlWGS:JPKZTcan_01937_1s_mrna	hypothetical protein Tcan_01937 [Toxocara canis]	0	0.086341	0	0.179138	0.090537	0	0.613647	0.999592	0.320167	-1.6431	down
Tcan_02745	gnlWGS:JPKZTcan_02745_1s_mrna	hypothetical protein Tcan_02745 [Toxocara canis]	0	0.098591	0	0	0.108113	0.198479	0.481107	0.999592	0.321571	-1.63679	down
Tcan_02710	gnlWGS:JPKZTcan_02710_1s_mrna	hypothetical protein Tcan_02710 [Toxocara canis]	0.019476	0.154162	0.09024	0.332536	0.140791	0.344506	0.224169	0.999592	0.322655	-1.63194	down
Tcan_07373	gnlWGS:JPKZTcan_07373_1s_mrna	hypothetical protein Tcan_07373 [Toxocara canis]	0	0.175133	0	0.112579	0.428893	0	0.537864	0.999592	0.323439	-1.62844	down
Tcan_01394	gnlWGS:JPKZTcan_01394_1s_mrna	hypothetical protein Tcan_01394, partial [Toxocara canis]	0	0.161034	0	0	0	0.497856	0.65729	0.999592	0.323455	-1.62836	down
Tcan_01474	gnlWGS:JPKZTcan_01474_1s_mrna	hypothetical protein Tcan_01474, partial [Toxocara canis]	0.375486	0.129158	0	0.472037	0.75904	0.329002	0.159808	0.999592	0.323473	-1.62828	down
Tcan_09274	gnlWGS:JPKZTcan_09274_1s_mrna	hypothetical protein Tcan_09274 [Toxocara canis]	0	0.301096	0	0.421899	0.505639	0	0.561722	0.999592	0.324619	-1.62318	down
Tcan_02105	gnlWGS:JPKZTcan_02105_1s_mrna	hypothetical protein Tcan_02105, partial [Toxocara canis]	0.84685	0	0.31412	1.16385	1.56672	0.843576	0.147624	0.999592	0.324824	-1.62227	down
Tcan_00857	gnlWGS:JPKZTcan_00857_1s_mrna	hypothetical protein Tcan_00857, partial [Toxocara canis]	0.103527	0.129585	0.163159	0.367438	0.849831	0	0.398826	0.999592	0.325541	-1.61909	down
Tcan_10369	gnlWGS:JPKZTcan_10369_1s_mrna	hypothetical protein Tcan_10369 [Toxocara canis]	0.338457	0	0.33229	1.35395	0.415535	0.285279	0.277795	0.999592	0.326435	-1.61513	down
Tcan_05992	gnlWGS:JPKZTcan_05992_1s_mrna	hypothetical protein Tcan_05992 [Toxocara canis]	0.18592	0	0	0	0.569401	0	0.634045	0.999592	0.326519	-1.61476	down
Tcan_08531	gnlWGS:JPKZTcan_08531_1s_mrna	hypothetical protein Tcan_08531 [Toxocara canis]	0.302455	0	0	0.633711	0.237132	0.054146	0.358241	0.999592	0.326982	-1.61272	down
Tcan_17193	gnlWGS:JPKZTcan_17193_1s_mrna	hypothetical protein Tcan_17193 [Toxocara canis]	0	0	0.296771	0.341225	0.270062	0.293008	0.455334	0.999592	0.328179	-1.60744	down
Tcan_13578	gnlWGS:JPKZTcan_13578_1s_mrna	Tyrosine-protein phosphatase non-receptor type 21 [Toxocara canis]	0	0.227272	0	0	0.604342	0.085953	0.524525	0.999592	0.329239	-1.60279	down
Tcan_09719	gnlWGS:JPKZTcan_09719_1s_mrna	hypothetical protein Tcan_09719 [Toxocara canis]	0	0	0.123375	0	0.373552	0	0.942346	0.999592	0.330275	-1.59826	down
Tcan_10733	gnlWGS:JPKZTcan_10733_1s_mrna	Sperm-specific class P protein 32 [Toxocara canis]	0.056386	0.251812	0.332273	0.41294	1.30634	0.218697	0.230022	0.999592	0.330484	-1.59735	down
Tcan_14551	gnlWGS:JPKZTcan_14551_1s_mrna	hypothetical protein Tcan_14551 [Toxocara canis]	0	0	0.113018	0.111571	0.137771	0.092398	0.483436	0.999592	0.330713	-1.59635	down
Tcan_00878	gnlWGS:JPKZTcan_00878_1s_mrna	hypothetical protein Tcan_00878, partial [Toxocara canis]	0.086362	0	0	0	0.260225	0	0.655397	0.999592	0.331874	-1.59129	down
Tcan_07005	gnlWGS:JPKZTcan_07005_1s_mrna	hypothetical protein Tcan_07005 [Toxocara canis]	0	0.310971	0	0.567839	0.087126	0.275653	0.430898	0.999592	0.334155	-1.58141	down
Tcan_10611	gnlWGS:JPKZTcan_10611_1s_mrna	Anillin-like protein 2, partial [Toxocara canis]	0	0	0.303124	0.249879	0.171531	0.484778	0.465479	0.999592	0.334505	-1.5799	down
Tcan_11538	gnlWGS:JPKZTcan_11538_1s_mrna	hypothetical protein Tcan_11538 [Toxocara canis]	0.161456	0	0	0.193289	0	0.288577	0.457709	0.999592	0.335064	-1.57749	down
Tcan_12656	gnlWGS:JPKZTcan_12656_1s_mrna	hypothetical protein Tcan_12656 [Toxocara canis]	0	0.267156	0	0.358652	0.438405	0	0.53465	0.999592	0.335178	-1.577	down
Tcan_11691	gnlWGS:JPKZTcan_11691_1s_mrna	hypothetical protein Tcan_11691 [Toxocara canis]	0	0.283653	0	0	0.416078	0.427861	0.519019	0.999592	0.336106	-1.57301	down
Tcan_05587	gnlWGS:JPKZTcan_05587_1s_mrna	hypothetical protein Tcan_05587 [Toxocara canis]	0.340308	0.162816	0	0.507209	0.580368	0.40248	0.15591	0.999592	0.337654	-1.56638	down
Tcan_17681	gnlWGS:JPKZTcan_17681_1s_mrna	hypothetical protein Tcan_17681 [Toxocara canis]	0.378475	0.127168	0.055405	0.622776	0.313697	0.722524	0.0905133	0.999592	0.338185	-1.56412	down
Tcan_13590	gnlWGS:JPKZTcan_13590_1s_mrna	hypothetical protein Tcan_13590 [Toxocara canis]	0	0.101546	0	0	0	0.299585	0.624283	0.999592	0.338956	-1.56083	down
Tcan_01234	gnlWGS:JPKZTcan_01234_1s_mrna	putative RNA-directed DNA polymerase from transposon X-element, partial [Toxocara canis]	0.088651	0.108088	0	0.168989	0.204476	0.206465	0.237458	0.999592	0.339246	-1.5596	down
Tcan_05535	gnlWGS:JPKZTcan_05535_1s_mrna	hypothetical protein Tcan_05535 [Toxocara canis]	0	0.128927	0	0	0.379317	0	0.714783	0.999592	0.339892	-1.55685	down
Tcan_16163	gnlWGS:JPKZTcan_16163_1s_mrna	UDP-GlcNAc:betaGal beta-1,3-N-acetylglucosaminyltransferase 7 [Toxocara canis]	0.185127	0.071785	0	0.374279	0.253869	0.125356	0.166868	0.999592	0.340956	-1.55234	down
Tcan_09704	gnlWGS:JPKZTcan_09704_1s_mrna	hypothetical protein Tcan_09704 [Toxocara canis]	0	0.061778	0.110319	0.20869	0.22161	0.071531	0.397442	0.999592	0.342938	-1.54398	down
Tcan_14071	gnlWGS:JPKZTcan_14071_1s_mrna	Putative cuticle collagen [Toxocara canis]	0	0.038456	0	0	0.112101	0	0.777265	0.999592	0.343048	-1.54352	down
Tcan_15339	gnlWGS:JPKZTcan_15339_1s_mrna	hypothetical protein Tcan_15339 [Toxocara canis]	0.49283	0	0	0.68916	0.549951	0.191614	0.378793	0.999592	0.344462	-1.53758	down
Tcan_15462	gnlWGS:JPKZTcan_15462_1s_mrna	hypothetical protein Tcan_15462 [Toxocara canis]	0.453056	0	0	0.836902	0	0.478238	0.484178	0.999592	0.344493	-1.53746	down
Tcan_13328	gnlWGS:JPKZTcan_13328_1s_mrna	putative G-protein coupled receptor tkr-1 [Toxocara canis]	0.999902	0.510359	0	0.887191	2.44381	1.04137	0.159368	0.999592	0.34541	-1.53362	down
Tcan_10985	gnlWGS:JPKZTcan_10985_1s_mrna	Ribulose-phosphate 3-epimerase [Toxocara canis]	0.03958	0	0.049817	0.25873	0	0	0.705695	0.999592	0.345522	-1.53315	down
Tcan_01569	gnlWGS:JPKZTcan_01569_1s_mrna	hypothetical protein Tcan_01569, partial [Toxocara canis]	0.228056	0	0.247305	0.813223	0.167212	0.391339	0.307686	0.999592	0.34653	-1.52895	down
Tcan_00109	gnlWGS:JPKZTcan_00109_1s_mrna	hypothetical protein Tcan_00109 [Toxocara canis]	0.33629	0.518272	0.049869	0.481086	1.54961	0.575359	0.156657	0.999592	0.347049	-1.52679	down
Tcan_06532	gnlWGS:JPKZTcan_06532_1s_mrna	hypothetical protein Tcan_06532 [Toxocara canis]	0	0	0.172807	0.226112	0.164929	0.105977	0.53763	0.999592	0.347688	-1.52414	down
Tcan_08423	gnlWGS:JPKZTcan_08423_1s_mrna	Protein Skeletor, isoforms D/E [Toxocara canis]	0.126242	0.122054	0	0.237248	0.347756	0.127914	0.184774	0.999592	0.348281	-1.52168	down
Tcan_13541	gnlWGS:JPKZTcan_13541_1s_mrna	hypothetical protein Tcan_13541 [Toxocara canis]	0	0	0.141324	0	0	0.404951	0.72181	0.999592	0.34899	-1.51874	down
Tcan_13021	gnlWGS:JPKZTcan_13021_1s_mrna	Cytidine deaminase [Toxocara canis]	0.542079	0.136999	0.271301	0.844532	1.61245	0.26228	0.14631	0.999592	0.349498	-1.51664	down
Tcan_07133	gnlWGS:JPKZTcan_07133_1s_mrna	hypothetical protein Tcan_07133, partial [Toxocara canis]	0.240512	0	0	0	0.298051	0.389241	0.473743	0.999592	0.349942	-1.51481	down
Tcan_10446	gnlWGS:JPKZTcan_10446_1s_mrna	hypothetical protein Tcan_10446 [Toxocara canis]	0.33605	0	0.155512	0.720316	0.680593	0	0.425672	0.999592	0.350888	-1.51092	down
Tcan_02174	gnlWGS:JPKZTcan_02174_1s_mrna	hypothetical protein Tcan_02174, partial [Toxocara canis]	0	0.117618	0	0.334801	0	0	0.704038	0.999592	0.351307	-1.50919	down
Tcan_00438	gnlWGS:JPKZTcan_00438_1s_mrna	hypothetical protein Tcan_00438, partial [Toxocara canis]	0	0.534449	0.542833	1.29221	0.728207	1.045	0.293677	0.999592	0.351432	-1.50868	down
Tcan_15648	gnlWGS:JPKZTcan_15648_1s_mrna	Receptor expression-enhancing protein 5 [Toxocara canis]	0.087327	0	0.088645	0.152583	0.232207	0.114651	0.363785	0.999592	0.352338	-1.50497	down
Tcan_02614	gnlWGS:JPKZTcan_02614_1s_mrna	hypothetical protein Tcan_02614 [Toxocara canis]	0.901405	0.293821	0	1.30022	1.88165	0.205536	0.235927	0.999592	0.352844	-1.5029	down
Tcan_02071	gnlWGS:JPKZTcan_02071_1s_mrna	unnamed protein product [Toxocara canis]	0.505069	0	0.472174	0.776759	0.664957	1.32736	0.236095	0.999592	0.352913	-1.50262	down
Tcan_00865	gnlWGS:JPKZTcan_00865_1s_mrna	hypothetical protein Tcan_00865, partial [Toxocara canis]	0.803226	1.35294	0.034139	2.89223	2.19551	1.11587	0.113786	0.999592	0.35307	-1.50197	down
Tcan_06391	gnlWGS:JPKZTcan_06391_1s_mrna	hypothetical protein Tcan_06391 [Toxocara canis]	1.94709	0.784017	0	3.56725	2.42859	1.70988	0.15995	0.999592	0.354426	-1.49644	down
Tcan_15623	gnlWGS:JPKZTcan_15623_1s_mrna	hypothetical protein Tcan_15623 [Toxocara canis]	0.099533	0	0	0.279948	0	0	0.688298	0.999592	0.355541	-1.49191	down
Tcan_18696	gnlWGS:JPKZTcan_18696_1s_mrna	Acetyl-coenzyme A synthetase [Toxocara canis]	0.079028	0	0	0	0.125283	0.096574	0.598837	0.999592	0.356211	-1.48919	down
Tcan_09483	gnlWGS:JPKZTcan_09483_1s_mrna	hypothetical protein Tcan_09483 [Toxocara canis]	0.774044	0	0.240821	0.728175	0.61249	1.50642	0.186754	0.999592	0.356457	-1.4882	down
Tcan_16486	gnlWGS:JPKZTcan_16486_1s_mrna	hypothetical protein Tcan_16486 [Toxocara canis]	0	0.400541	0.201891	0.724828	0.438184	0.522174	0.333055	0.999592	0.357487	-1.48404	down
Tcan_07662	gnlWGS:JPKZTcan_07662_1s_mrna	hypothetical protein Tcan_07662, partial [Toxocara canis]	0.520155	0	0.404478	0.834048	1.11313	0.636282	0.218591	0.999592	0.357905	-1.48235	down
Tcan_07028	gnlWGS:JPKZTcan_07028_1s_mrna	hypothetical protein Tcan_07028 [Toxocara canis]	0.350732	0	0	0.332571	0.646077	0	0.527283	0.999592	0.358384	-1.48042	down
Tcan_10360	gnlWGS:JPKZTcan_10360_1s_mrna	Putative proline-rich protein 21 [Toxocara canis]	0.040356	0	0	0.02811	0	0.084385	0.513451	0.999592	0.358736	-1.47901	down
Tcan_05343	gnlWGS:JPKZTcan_05343_1s_mrna	Alpha-(1,6)-fucosyltransferase [Toxocara canis]	0	8.73858	0	12.3664	11.8515	0	0.722598	0.999592	0.360832	-1.4706	down
Tcan_18431	gnlWGS:JPKZTcan_18431_1s_mrna	hypothetical protein Tcan_18431 [Toxocara canis]	0.204611	0.184184	0.242052	0.363355	0.890046	0.493118	0.184505	0.999592	0.361202	-1.46912	down
Tcan_03306	gnlWGS:JPKZTcan_03306_1s_mrna	Eukaryotic translation initiation factor 3 subunit D [Toxocara canis]	0	0.118513	0	0.061828	0.19759	0.068475	0.415351	0.999592	0.361438	-1.46818	down
Tcan_12744	gnlWGS:JPKZTcan_12744_1s_mrna	Serine/threonine-protein kinase haspin [Toxocara canis]	0.112827	0.177339	0	0.351958	0.226334	0.22312	0.183486	0.999592	0.362068	-1.46567	down
Tcan_10962	gnlWGS:JPKZTcan_10962_1s_mrna	hypothetical protein Tcan_10962 [Toxocara canis]	0.145163	0.0571	0.042617	0.360388	0.266136	0.049199	0.298057	0.999592	0.362397	-1.46436	down
Tcan_12047	gnlWGS:JPKZTcan_12047_1s_mrna	hypothetical protein Tcan_12047 [Toxocara canis]	0.259439	0.334737	0	0.46694	1.1708	0	0.452648	0.999592	0.362803	-1.46274	down
Tcan_09601	gnlWGS:JPKZTcan_09601_1s_mrna	hypothetical protein Tcan_09601 [Toxocara canis]	1.46383	0.343973	0.278375	2.09691	3.1053	0.539772	0.0964033	0.999592	0.363321	-1.46068	down
Tcan_12107	gnlWGS:JPKZTcan_12107_1s_mrna	hypothetical protein Tcan_12107 [Toxocara canis]	0.07365	0	0	0	0	0.202526	0.724201	0.999592	0.363657	-1.45935	down
Tcan_00569	gnlWGS:JPKZTcan_00569_1s_mrna	hypothetical protein Tcan_00569, partial [Toxocara canis]	0.415436	0	0.456625	0.936098	1.07289	0.378866	0.272008	0.999592	0.365206	-1.45322	down
Tcan_16619	gnlWGS:JPKZTcan_16619_1s_mrna	hypothetical protein Tcan_16619 [Toxocara canis]	0.095258	0	0	0.15526	0.105535	0	0.514596	0.999592	0.36526	-1.453	down
Tcan_05705	gnlWGS:JPKZTcan_05705_1s_mrna	hypothetical protein Tcan_05705 [Toxocara canis]	0.074783	0	0	0.06125	0.143416	0	0.575029	0.999592	0.36539	-1.45249	down
Tcan_00679	gnlWGS:JPKZTcan_00679_1s_mrna	hypothetical protein Tcan_00679, partial [Toxocara canis]	2.4803	0.91048	0.103016	4.32745	3.85873	1.37115	0.0926486	0.999592	0.365562	-1.45181	down
Tcan_10794	gnlWGS:JPKZTcan_10794_1s_mrna	hypothetical protein Tcan_10794 [Toxocara canis]	0	0.278471	0	0.342562	0.275452	0.143361	0.46692	0.999592	0.365747	-1.45108	down
Tcan_13859	gnlWGS:JPKZTcan_13859_1s_mrna	hypothetical protein Tcan_13859 [Toxocara canis]	0	0	0.032242	0	0.087962	0	0.851368	0.999592	0.366545	-1.44794	down
Tcan_13818	gnlWGS:JPKZTcan_13818_1s_mrna	hypothetical protein Tcan_13818 [Toxocara canis]	0.205536	0	0	0.055982	0.150042	0.354575	0.417289	0.999592	0.366636	-1.44758	down
Tcan_10701	gnlWGS:JPKZTcan_10701_1s_mrna	Putative zinc finger protein C06E1.8 [Toxocara canis]	0.106693	0	0	0.290317	0	0	0.678146	0.999592	0.367505	-1.44416	down
Tcan_16885	gnlWGS:JPKZTcan_16885_1s_mrna	hypothetical protein Tcan_16885 [Toxocara canis]	0	0	0.092668	0.111655	0.140289	0	0.719041	0.999592	0.367812	-1.44296	down
Tcan_01224	gnlWGS:JPKZTcan_01224_1s_mrna	unnamed protein product [Toxocara canis]	0.325534	0.65475	0.003414	1.04384	1.0714	0.542706	0.160148	0.999592	0.370097	-1.43402	down
Tcan_00912	gnlWGS:JPKZTcan_00912_1s_mrna	hypothetical protein Tcan_00912, partial [Toxocara canis]	0.113909	0.241593	0	0.238851	0.531473	0.190139	0.285714	0.999592	0.370136	-1.43387	down
Tcan_06368	gnlWGS:JPKZTcan_06368_1s_mrna	Putative cytochrome b561 [Toxocara canis]	0	0.276726	0.118962	0.428664	0.481636	0.155026	0.34515	0.999592	0.371424	-1.42886	down
Tcan_00651	gnlWGS:JPKZTcan_00651_1s_mrna	hypothetical protein Tcan_00651, partial [Toxocara canis]	0.168477	0.915606	0	0.600923	0.942147	1.37131	0.254608	0.999592	0.371977	-1.42671	down
Tcan_13843	gnlWGS:JPKZTcan_13843_1s_mrna	hypothetical protein Tcan_13843 [Toxocara canis]	0	0	0.072003	0.093821	0.09974	0	0.80765	0.999592	0.371991	-1.42666	down
Tcan_16549	gnlWGS:JPKZTcan_16549_1s_mrna	Leucine-rich repeat-containing protein 3 [Toxocara canis]	0	0.082496	0	0	0.221611	0	0.733143	0.999592	0.372256	-1.42563	down
Tcan_08505	gnlWGS:JPKZTcan_08505_1s_mrna	hypothetical protein Tcan_08505, partial [Toxocara canis]	0.234707	0	0.145835	0.367734	0.370123	0.284262	0.356975	0.999592	0.372307	-1.42544	down
Tcan_01955	gnlWGS:JPKZTcan_01955_1s_mrna	hypothetical protein Tcan_01955 [Toxocara canis]	0.378095	0.274578	0.140692	0.579789	1.13365	0.416689	0.0671894	0.999592	0.372449	-1.42488	down
Tcan_04700	gnlWGS:JPKZTcan_04700_1s_mrna	hypothetical protein Tcan_04700 [Toxocara canis]	0	0.141888	0	0.218419	0.070897	0.090102	0.434189	0.999592	0.373962	-1.41904	down
Tcan_03801	gnlWGS:JPKZTcan_03801_1s_mrna	hypothetical protein Tcan_03801 [Toxocara canis]	0	0	2.98611	0	4.02946	3.94585	0.754848	0.999592	0.374419	-1.41727	down
Tcan_11611	gnlWGS:JPKZTcan_11611_1s_mrna	hypothetical protein Tcan_11611 [Toxocara canis]	0	3.27595	2.5769	6.13359	4.92309	4.50462	0.273036	0.999592	0.376116	-1.41075	down
Tcan_18920	gnlWGS:JPKZTcan_18920_1s_mrna	hypothetical protein Tcan_18920 [Toxocara canis]	0.053244	0.142957	0	0.520724	0	0	0.743381	0.999592	0.376785	-1.40819	down
Tcan_12030	gnlWGS:JPKZTcan_12030_1s_mrna	hypothetical protein Tcan_12030, partial [Toxocara canis]	0.058613	0	0.042868	0.060306	0.156217	0.052761	0.354759	0.999592	0.376855	-1.40792	down
Tcan_10919	gnlWGS:JPKZTcan_10919_1s_mrna	hypothetical protein Tcan_10919 [Toxocara canis]	0.170329	0	0	0	0.451269	0	0.685798	0.999592	0.377444	-1.40566	down
Tcan_13268	gnlWGS:JPKZTcan_13268_1s_mrna	hypothetical protein Tcan_13268 [Toxocara canis]	0	0	0.10453	0.149099	0.127639	0	0.696879	0.999592	0.377722	-1.4046	down
Tcan_12939	gnlWGS:JPKZTcan_12939_1s_mrna	hypothetical protein Tcan_12939 [Toxocara canis]	0	0.049972	0	0	0.13195	0	0.779076	0.999592	0.378719	-1.4008	down
Tcan_05558	gnlWGS:JPKZTcan_05558_1s_mrna	Tyrosine-protein kinase [Toxocara canis]	0	0.038055	0	0	0.100443	0	0.827157	0.999592	0.378872	-1.40022	down
Tcan_08790	gnlWGS:JPKZTcan_08790_1s_mrna	hypothetical protein Tcan_08790 [Toxocara canis]	0.306529	0	0	0	0.535293	0.269895	0.577246	0.999592	0.380692	-1.3933	down
Tcan_04033	gnlWGS:JPKZTcan_04033_1s_mrna	UDP-glucuronosyltransferase 1-3 [Toxocara canis]	0.085771	0	0.083888	0.257577	0	0.187737	0.518525	0.999592	0.380987	-1.39219	down
Tcan_01278	gnlWGS:JPKZTcan_01278_1s_mrna	hypothetical protein Tcan_01278, partial [Toxocara canis]	0	0.137352	0	0	0.270083	0.088793	0.686303	0.999592	0.382728	-1.38561	down
Tcan_00726	gnlWGS:JPKZTcan_00726_1s_mrna	hypothetical protein Tcan_00726, partial [Toxocara canis]	0.530363	0.959307	0.071693	0.345135	2.52538	1.19423	0.183382	0.999592	0.384123	-1.38036	down
Tcan_15344	gnlWGS:JPKZTcan_15344_1s_mrna	hypothetical protein Tcan_15344 [Toxocara canis]	0.042366	0	0.023465	0.087242	0.034428	0.049346	0.298136	0.999592	0.384941	-1.37729	down
Tcan_14659	gnlWGS:JPKZTcan_14659_1s_mrna	hypothetical protein Tcan_14659 [Toxocara canis]	0.004992	0	0.096804	0	0.065684	0.198479	0.842728	0.999592	0.385353	-1.37575	down
Tcan_11466	gnlWGS:JPKZTcan_11466_1s_mrna	hypothetical protein Tcan_11466 [Toxocara canis]	0	0	0.22441	0	0.580452	0	0.854163	0.999592	0.386613	-1.37104	down
Tcan_00313	gnlWGS:JPKZTcan_00313_1s_mrna	C-type lectin protein, partial [Toxocara canis]	0.352945	0	0.235088	0.357005	0.705686	0.458099	0.291589	0.999592	0.386663	-1.37085	down
Tcan_01196	gnlWGS:JPKZTcan_01196_1s_mrna	hypothetical protein Tcan_01196, partial [Toxocara canis]	0.108346	0	0	0.115182	0.1638	0	0.645012	0.999592	0.388362	-1.36453	down
Tcan_00941	gnlWGS:JPKZTcan_00941_1s_mrna	hypothetical protein Tcan_00941, partial [Toxocara canis]	0.047421	0	0.04659	0.048845	0.098746	0.094133	0.512256	0.999592	0.388919	-1.36246	down
Tcan_16157	gnlWGS:JPKZTcan_16157_1s_mrna	Cuticlin-1 [Toxocara canis]	0.108244	0.178916	0	0.095273	0.372108	0.270674	0.277553	0.999592	0.389077	-1.36187	down
Tcan_08815	gnlWGS:JPKZTcan_08815_1s_mrna	hypothetical protein Tcan_08815 [Toxocara canis]	0	19.7977	0	17.3363	19.0587	14.4072	0.628967	0.999592	0.389701	-1.35956	down
Tcan_13412	gnlWGS:JPKZTcan_13412_1s_mrna	Lymphocyte antigen 75 [Toxocara canis]	0.171015	0.057162	0.042026	0.211072	0.348246	0.13125	0.147993	0.999592	0.391276	-1.35374	down
Tcan_00352	gnlWGS:JPKZTcan_00352_1s_mrna	hypothetical protein Tcan_00352, partial [Toxocara canis]	0.129101	0.072299	0	0.119384	0.317442	0.07742	0.454787	0.999592	0.391641	-1.35239	down
Tcan_14382	gnlWGS:JPKZTcan_14382_1s_mrna	hypothetical protein Tcan_14382 [Toxocara canis]	1.24121	0	0	3.16832	0	0	0.670559	0.999592	0.391756	-1.35197	down
Tcan_13553	gnlWGS:JPKZTcan_13553_1s_mrna	hypothetical protein Tcan_13553 [Toxocara canis]	0	0.261203	0.064803	0	0.369644	0.461141	0.488069	0.999592	0.392407	-1.34958	down
Tcan_06538	gnlWGS:JPKZTcan_06538_1s_mrna	Chondroitin proteoglycan 2 [Toxocara canis]	0.050003	0	0.129962	0.109249	0.057632	0.291224	0.429626	0.999592	0.392847	-1.34796	down
Tcan_05114	gnlWGS:JPKZTcan_05114_1s_mrna	hypothetical protein Tcan_05114 [Toxocara canis]	11.5559	0	0	11.2881	11.3303	6.74958	0.57431	0.999592	0.393487	-1.34561	down
Tcan_00117	gnlWGS:JPKZTcan_00117_1s_mrna	hypothetical protein Tcan_00117 [Toxocara canis]	2.2871	0.93157	0	2.91032	2.80291	2.43845	0.193451	0.999592	0.394847	-1.34063	down
Tcan_00826	gnlWGS:JPKZTcan_00826_1s_mrna	hypothetical protein Tcan_00826, partial [Toxocara canis]	0.502804	0.131199	0	0.296837	0.902653	0.405499	0.333812	0.999592	0.39502	-1.34	down
Tcan_09561	gnlWGS:JPKZTcan_09561_1s_mrna	Serpentine receptor class T-55 [Toxocara canis]	0.343547	0	0	0.220803	0.195937	0.452357	0.370351	0.999592	0.395292	-1.33901	down
Tcan_17157	gnlWGS:JPKZTcan_17157_1s_mrna	hypothetical protein Tcan_17157 [Toxocara canis]	0.522358	0.269119	0	1.01306	0.25282	0.736186	0.248602	0.999592	0.39533	-1.33887	down
Tcan_09565	gnlWGS:JPKZTcan_09565_1s_mrna	hypothetical protein Tcan_09565 [Toxocara canis]	0.577757	0	0.364266	0.935628	0.666167	0.777085	0.29133	0.999592	0.395994	-1.33645	down
Tcan_15785	gnlWGS:JPKZTcan_15785_1s_mrna	hypothetical protein Tcan_15785 [Toxocara canis]	0.513354	0	0	0	0.643682	0.647003	0.515657	0.999592	0.397738	-1.33011	down
Tcan_17420	gnlWGS:JPKZTcan_17420_1s_mrna	hypothetical protein Tcan_17420 [Toxocara canis]	0	0.085393	0.232926	0.303496	0	0.496612	0.547922	0.999592	0.397845	-1.32972	down
Tcan_00283	gnlWGS:JPKZTcan_00283_1s_mrna	hypothetical protein Tcan_00283 [Toxocara canis]	0	0.133569	0.148444	0.317263	0.314469	0.075769	0.478146	0.999592	0.398604	-1.32697	down
Tcan_01169	gnlWGS:JPKZTcan_01169_1s_mrna	hypothetical protein Tcan_01169, partial [Toxocara canis]	0.215438	0.030255	0.068511	0.320592	0.017055	0.450043	0.381073	0.999592	0.398893	-1.32593	down
Tcan_05374	gnlWGS:JPKZTcan_05374_1s_mrna	B-box type zinc finger protein ncl-1 [Toxocara canis]	0.376892	0	0.095437	0.353267	0.682368	0.147908	0.323719	0.999592	0.399081	-1.32525	down
Tcan_04827	gnlWGS:JPKZTcan_04827_1s_mrna	Protein UBASH3A -like protein [Toxocara canis]	0.10659	0	0	0	0	0.266221	0.640233	0.999592	0.400382	-1.32055	down
Tcan_12464	gnlWGS:JPKZTcan_12464_1s_mrna	Tau-tubulin kinase 1 [Toxocara canis]	0.171143	0	0	0	0.191383	0.235968	0.509972	0.999592	0.400474	-1.32022	down
Tcan_03891	gnlWGS:JPKZTcan_03891_1s_mrna	Cuticle collagen lon-3 [Toxocara canis]	0.444257	0	0.106335	0.339864	0.943789	0.089641	0.394241	0.999592	0.400928	-1.31858	down
Tcan_05856	gnlWGS:JPKZTcan_05856_1s_mrna	hypothetical protein Tcan_05856 [Toxocara canis]	0	0	0.167459	0	0.106887	0.310564	0.670028	0.999592	0.401146	-1.3178	down
Tcan_05243	gnlWGS:JPKZTcan_05243_1s_mrna	hypothetical protein Tcan_05243 [Toxocara canis]	0.050286	0.013332	0.365216	0.365757	0.698616	0	0.651406	0.999592	0.402898	-1.31151	down
Tcan_01779	gnlWGS:JPKZTcan_01779_1s_mrna	hypothetical protein Tcan_01779, partial [Toxocara canis]	1.06615	0	0	1.41125	0	1.23186	0.506368	0.999592	0.403369	-1.30983	down
Tcan_17182	gnlWGS:JPKZTcan_17182_1s_mrna	hypothetical protein Tcan_17182 [Toxocara canis]	0	0.076837	0.036047	0.08296	0.196683	0	0.684763	0.999592	0.403672	-1.30875	down
Tcan_04469	gnlWGS:JPKZTcan_04469_1s_mrna	hypothetical protein Tcan_04469 [Toxocara canis]	0	0.357912	0	0.49202	0	0.394234	0.578441	0.999592	0.403848	-1.30812	down
Tcan_06653	gnlWGS:JPKZTcan_06653_1s_mrna	RNA-binding protein 39 [Toxocara canis]	0.228543	0	0.169525	0.291266	0.516352	0.177866	0.29928	0.999592	0.403931	-1.30782	down
Tcan_00497	gnlWGS:JPKZTcan_00497_1s_mrna	Uncharacterized protein K02A2.6, partial [Toxocara canis]	0.28778	0.377173	0.057853	0.410026	0.811709	0.564754	0.209312	0.999592	0.404596	-1.30545	down
Tcan_07420	gnlWGS:JPKZTcan_07420_1s_mrna	unnamed protein product [Toxocara canis]	0	0.338455	0.272656	0.531446	0.237158	0.735071	0.418371	0.999592	0.406412	-1.29899	down
Tcan_07280	gnlWGS:JPKZTcan_07280_1s_mrna	Alpha-(1,3)-fucosyltransferase C [Toxocara canis]	0.184186	0.280892	0	0.34173	0.316052	0.484845	0.239428	0.999592	0.407025	-1.29681	down
Tcan_00746	gnlWGS:JPKZTcan_00746_1s_mrna	hypothetical protein Tcan_00746, partial [Toxocara canis]	2.20797	1.07811	1.01178	4.09865	5.51022	0.925942	0.0920566	0.999592	0.407968	-1.29347	down
Tcan_03870	gnlWGS:JPKZTcan_03870_1s_mrna	Cyclic AMP-responsive element-binding protein 3-like protein 1 [Toxocara canis]	0.672107	0.211435	0	0.836929	0.240342	1.07575	0.252253	0.999592	0.410373	-1.28499	down
Tcan_00778	gnlWGS:JPKZTcan_00778_1s_mrna	hypothetical protein Tcan_00778, partial [Toxocara canis]	0	0.081671	0.394686	0.720716	0.110333	0.328833	0.544738	0.999592	0.410694	-1.28386	down
Tcan_09864	gnlWGS:JPKZTcan_09864_1s_mrna	Tyrosine-protein kinase transforming protein Fps, partial [Toxocara canis]	0.139368	0	0.079745	0.342902	0.19051	0	0.529141	0.999592	0.410776	-1.28358	down
Tcan_11205	gnlWGS:JPKZTcan_11205_1s_mrna	Cuticlin-1 [Toxocara canis]	0	0	0.052802	0.076142	0.052284	0	0.785193	0.999592	0.411147	-1.28227	down
Tcan_09370	gnlWGS:JPKZTcan_09370_1s_mrna	Mitochondrial coenzyme A transporter SLC25A42 [Toxocara canis]	0.123	0	0	0	0.049978	0.248704	0.535861	0.999592	0.411809	-1.27995	down
Tcan_09932	gnlWGS:JPKZTcan_09932_1s_mrna	hypothetical protein Tcan_09932 [Toxocara canis]	0	0	0.495021	0.202031	0.556437	0.442527	0.584762	0.999592	0.412176	-1.27867	down
Tcan_09132	gnlWGS:JPKZTcan_09132_1s_mrna	Palmitoyltransferase ZDHHC15, partial [Toxocara canis]	0.052723	0	0	0.127793	0	0	0.722465	0.999592	0.412566	-1.2773	down
Tcan_13171	gnlWGS:JPKZTcan_13171_1s_mrna	hypothetical protein Tcan_13171 [Toxocara canis]	0.067601	0	0.031031	0.043654	0.157208	0.038193	0.374246	0.999592	0.412591	-1.27721	down
Tcan_17993	gnlWGS:JPKZTcan_17993_1s_mrna	hypothetical protein Tcan_17993 [Toxocara canis]	0.163806	0	0.10127	0.318249	0.322582	0	0.611609	0.999592	0.413644	-1.27354	down
Tcan_17745	gnlWGS:JPKZTcan_17745_1s_mrna	unnamed protein product [Toxocara canis]	0.183336	0	0	0	0.442984	0	0.783491	0.999592	0.413866	-1.27276	down
Tcan_03241	gnlWGS:JPKZTcan_03241_1s_mrna	Cytochrome b-c1 complex subunit Rieske, mitochondrial [Toxocara canis]	0.236242	0.321125	0	0.380531	0.197413	0.767924	0.243139	0.999592	0.414132	-1.27184	down
Tcan_10466	gnlWGS:JPKZTcan_10466_1s_mrna	hypothetical protein Tcan_10466 [Toxocara canis]	0.337995	0	0	0.184219	0.386288	0.245644	0.453206	0.999592	0.414133	-1.27183	down
Tcan_12207	gnlWGS:JPKZTcan_12207_1s_mrna	hypothetical protein Tcan_12207 [Toxocara canis]	0.946404	0.562433	0	1.72375	1.91849	0	0.478187	0.999592	0.41426	-1.27139	down
Tcan_11035	gnlWGS:JPKZTcan_11035_1s_mrna	putative serine/threonine-protein kinase [Toxocara canis]	0	0.126513	0	0	0.233288	0.071756	0.609085	0.999592	0.414737	-1.26973	down
Tcan_01850	gnlWGS:JPKZTcan_01850_1s_mrna	Filamin-C [Toxocara canis]	0.134955	0	0	0	0	0.325219	0.724201	0.999592	0.414967	-1.26893	down
Tcan_01101	gnlWGS:JPKZTcan_01101_1s_mrna	hypothetical protein Tcan_01101, partial [Toxocara canis]	0.448855	0	0	0	0.63897	0.441782	0.590162	0.999592	0.415317	-1.26771	down
Tcan_10497	gnlWGS:JPKZTcan_10497_1s_mrna	hypothetical protein Tcan_10497 [Toxocara canis]	4.23859	1.2792	0.343215	5.31998	5.98867	2.78601	0.0710044	0.999592	0.415831	-1.26593	down
Tcan_00540	gnlWGS:JPKZTcan_00540_1s_mrna	hypothetical protein Tcan_00540, partial [Toxocara canis]	0.233506	0	0.258317	0.116298	0.574254	0.491388	0.381049	0.999592	0.416115	-1.26495	down
Tcan_05305	gnlWGS:JPKZTcan_05305_1s_mrna	hypothetical protein Tcan_05305 [Toxocara canis]	0.036718	0	0.163398	0.388326	0	0.090581	0.636309	0.999592	0.41786	-1.25891	down
Tcan_18669	gnlWGS:JPKZTcan_18669_1s_mrna	Protein male abnormal 3, partial [Toxocara canis]	0.199992	0	0	0.142542	0	0.336	0.566726	0.999592	0.417919	-1.2587	down
Tcan_11232	gnlWGS:JPKZTcan_11232_1s_mrna	hypothetical protein Tcan_11232 [Toxocara canis]	0	0.336482	1.25692	1.48151	1.23633	1.09406	0.445241	0.999592	0.418008	-1.2584	down
Tcan_15156	gnlWGS:JPKZTcan_15156_1s_mrna	hypothetical protein Tcan_15156 [Toxocara canis]	0	0.128556	0	0.198673	0.108862	0	0.693732	0.999592	0.418021	-1.25835	down
Tcan_01438	gnlWGS:JPKZTcan_01438_1s_mrna	hypothetical protein Tcan_01438 [Toxocara canis]	0.255497	0.217148	0	0.267871	0.597736	0.262882	0.271646	0.999592	0.41883	-1.25556	down
Tcan_01044	gnlWGS:JPKZTcan_01044_1s_mrna	hypothetical protein Tcan_01044, partial [Toxocara canis]	0.144594	0	0.299097	0.243491	0.25973	0.555406	0.422726	0.999592	0.419119	-1.25457	down
Tcan_13077	gnlWGS:JPKZTcan_13077_1s_mrna	Sperm transmembrane protein 9 [Toxocara canis]	0.240431	0.08499	0	0.303109	0.268413	0.203556	0.253113	0.999592	0.419856	-1.25203	down
Tcan_10696	gnlWGS:JPKZTcan_10696_1s_mrna	hypothetical protein Tcan_10696 [Toxocara canis]	0.025159	0.006874	0	0.076271	0	0	0.69999	0.999592	0.419989	-1.25158	down
Tcan_14203	gnlWGS:JPKZTcan_14203_1s_mrna	hypothetical protein Tcan_14203 [Toxocara canis]	0.224133	0	0	0.32904	0	0.203592	0.565558	0.999592	0.420803	-1.24878	down
Tcan_00407	gnlWGS:JPKZTcan_00407_1s_mrna	hypothetical protein Tcan_00407, partial [Toxocara canis]	0	0	0.050817	0.063244	0.057508	0	0.80765	0.999592	0.420838	-1.24866	down
Tcan_01607	gnlWGS:JPKZTcan_01607_1s_mrna	DNA topoisomerase 1 [Toxocara canis]	0	0.130255	0.113834	0.191295	0.104296	0.284256	0.408387	0.999592	0.420954	-1.24826	down
Tcan_07472	gnlWGS:JPKZTcan_07472_1s_mrna	hypothetical protein Tcan_07472 [Toxocara canis]	0.1616	0.23319	0	0.156274	0.638106	0.139416	0.380732	0.999592	0.42278	-1.24202	down
Tcan_00293	gnlWGS:JPKZTcan_00293_1s_mrna	hypothetical protein Tcan_00293 [Toxocara canis]	0.507962	0	0.004985	0.160516	0.727609	0.324952	0.435273	0.999592	0.422848	-1.24179	down
Tcan_09837	gnlWGS:JPKZTcan_09837_1s_mrna	hypothetical protein Tcan_09837 [Toxocara canis]	0.502889	0	0	0.393793	0.793883	0	0.59207	0.999592	0.423423	-1.23983	down
Tcan_03630	gnlWGS:JPKZTcan_03630_1s_mrna	hypothetical protein Tcan_03630 [Toxocara canis]	0	0.162735	0.403605	0.298869	0.474417	0.559217	0.481076	0.999592	0.42502	-1.2344	down
Tcan_00465	gnlWGS:JPKZTcan_00465_1s_mrna	Craniofacial development protein 2, partial [Toxocara canis]	0.088226	0.255684	0	0.498503	0.31047	0	0.562104	0.999592	0.425119	-1.23406	down
Tcan_04041	gnlWGS:JPKZTcan_04041_1s_mrna	hypothetical protein Tcan_04041 [Toxocara canis]	0	0.113191	0	0.189513	0.076711	0	0.643331	0.999592	0.425172	-1.23388	down
Tcan_12981	gnlWGS:JPKZTcan_12981_1s_mrna	hypothetical protein Tcan_12981 [Toxocara canis]	0.791727	0.965586	0.015841	1.8532	2.09715	0.211054	0.306428	0.999592	0.426095	-1.23075	down
Tcan_07307	gnlWGS:JPKZTcan_07307_1s_mrna	Enolase-phosphatase E1 [Toxocara canis]	0.553262	0	0.068517	0.885797	0.167011	0.4051	0.325845	0.999592	0.426487	-1.22943	down
Tcan_00712	gnlWGS:JPKZTcan_00712_1s_mrna	hypothetical protein Tcan_00712, partial [Toxocara canis]	0.956315	0.035213	0.495194	1.26335	1.80797	0.413523	0.314932	0.999592	0.426626	-1.22896	down
Tcan_10652	gnlWGS:JPKZTcan_10652_1s_mrna	hypothetical protein Tcan_10652 [Toxocara canis]	0.360923	0.635185	0.118805	0.458705	1.02426	1.12932	0.145234	0.999592	0.426796	-1.22838	down
Tcan_04834	gnlWGS:JPKZTcan_04834_1s_mrna	hypothetical protein Tcan_04834 [Toxocara canis]	0.187209	0.128866	0	0.076481	0.4741	0.189307	0.317855	0.999592	0.427193	-1.22704	down
Tcan_00449	gnlWGS:JPKZTcan_00449_1s_mrna	hypothetical protein Tcan_00448, partial [Toxocara canis]	0.059641	0.185921	0.094147	0.4205	0.272757	0.099554	0.376514	0.999592	0.428487	-1.22268	down
Tcan_18522	gnlWGS:JPKZTcan_18522_1s_mrna	hypothetical protein Tcan_18522 [Toxocara canis]	0	0	0.274882	0	0.179858	0.460233	0.703827	0.999592	0.429442	-1.21946	down
Tcan_11506	gnlWGS:JPKZTcan_11506_1s_mrna	Troponin T [Toxocara canis]	1.55131	0	0.439331	2.85045	1.78102	0	0.535939	0.999592	0.429808	-1.21824	down
Tcan_14404	gnlWGS:JPKZTcan_14404_1s_mrna	hypothetical protein Tcan_14404 [Toxocara canis]	0.081136	0.008209	0.020843	0.061809	0.175126	0.01907	0.857719	0.999592	0.430413	-1.2162	down
Tcan_16512	gnlWGS:JPKZTcan_16512_1s_mrna	hypothetical protein Tcan_16512 [Toxocara canis]	0.353449	0	0	0.44762	0.373367	0	0.593943	0.999592	0.430517	-1.21586	down
Tcan_02040	gnlWGS:JPKZTcan_02040_1s_mrna		0	0.301543	0.096804	0.308266	0.360505	0.256382	0.392707	0.999592	0.430574	-1.21567	down
Tcan_13941	gnlWGS:JPKZTcan_13941_1s_mrna	Cuticlin-1 [Toxocara canis]	0	0.114511	0.151781	0.263408	0.224082	0.130878	0.416462	0.999592	0.430637	-1.21546	down
Tcan_18901	gnlWGS:JPKZTcan_18901_1s_mrna	hypothetical protein Tcan_18901 [Toxocara canis]	14.5347	0	0	12.5943	14.4957	6.61982	0.635526	0.999592	0.431172	-1.21366	down
Tcan_01338	gnlWGS:JPKZTcan_01338_1s_mrna	hypothetical protein Tcan_01338, partial [Toxocara canis]	0.359233	0.570683	0.101644	1.29152	0.980977	0.115491	0.295154	0.999592	0.431979	-1.21097	down
Tcan_00702	gnlWGS:JPKZTcan_00702_1s_mrna	hypothetical protein Tcan_00702, partial [Toxocara canis]	0.839153	0.314963	0.795701	1.15444	2.41227	0.937684	0.161097	0.999592	0.43287	-1.20799	down
Tcan_16577	gnlWGS:JPKZTcan_16577_1s_mrna	hypothetical protein Tcan_16577 [Toxocara canis]	0.47949	0.164252	0.486755	0.641779	0.799176	1.16876	0.20666	0.999592	0.433188	-1.20694	down
Tcan_15498	gnlWGS:JPKZTcan_15498_1s_mrna	hypothetical protein Tcan_15498 [Toxocara canis]	0	0.093532	0.319308	0.660255	0.291031	0	0.666048	0.999592	0.433981	-1.2043	down
Tcan_02484	gnlWGS:JPKZTcan_02484_1s_mrna	hypothetical protein Tcan_02484 [Toxocara canis]	0.478977	0	0	0.783577	0.319082	0	0.62949	0.999592	0.434384	-1.20296	down
Tcan_16515	gnlWGS:JPKZTcan_16515_1s_mrna	hypothetical protein Tcan_16515 [Toxocara canis]	0.70578	0.267059	0	0.587368	1.65179	0	0.64962	0.999592	0.434466	-1.20268	down
Tcan_06834	gnlWGS:JPKZTcan_06834_1s_mrna	hypothetical protein Tcan_06834 [Toxocara canis]	0.813674	0.045608	0.020521	1.29812	0.572481	0.153165	0.322349	0.999592	0.434735	-1.20179	down
Tcan_13420	gnlWGS:JPKZTcan_13420_1s_mrna	Dynein light chain, cytoplasmic [Toxocara canis]	0.237771	0	0.759098	0.058138	0.907305	1.32643	0.512954	0.999592	0.434958	-1.20105	down
Tcan_13968	gnlWGS:JPKZTcan_13968_1s_mrna	hypothetical protein Tcan_13968 [Toxocara canis]	0.203272	0.027944	0.075891	0.338507	0.241293	0.125482	0.168757	0.999592	0.435439	-1.19946	down
Tcan_10323	gnlWGS:JPKZTcan_10323_1s_mrna	hypothetical protein Tcan_10323 [Toxocara canis]	0.322161	0.322794	0	0.897553	0.270318	0.312358	0.314188	0.999592	0.435713	-1.19855	down
Tcan_16849	gnlWGS:JPKZTcan_16849_1s_mrna	hypothetical protein Tcan_16849, partial [Toxocara canis]	0.218909	0	0.198583	0.212105	0.31801	0.427964	0.391953	0.999592	0.435759	-1.1984	down
Tcan_03164	gnlWGS:JPKZTcan_03164_1s_mrna	hypothetical protein Tcan_03164 [Toxocara canis]	0.385268	0	0	0.428605	0.195394	0.259843	0.483537	0.999592	0.435901	-1.19793	down
Tcan_07975	gnlWGS:JPKZTcan_07975_1s_mrna	Tenascin [Toxocara canis]	0.495985	0.478909	0.376418	0.513123	1.80595	0.768905	0.141219	0.999592	0.437604	-1.1923	down
Tcan_06512	gnlWGS:JPKZTcan_06512_1s_mrna	hypothetical protein Tcan_06512 [Toxocara canis]	0.176002	0	0.104476	0.169572	0.471167	0	0.612443	0.999592	0.437741	-1.19185	down
Tcan_14764	gnlWGS:JPKZTcan_14764_1s_mrna	hypothetical protein Tcan_14764 [Toxocara canis]	0.391964	0.25906	0	0.751799	0.485851	0.246256	0.293995	0.999592	0.438723	-1.18862	down
Tcan_02960	gnlWGS:JPKZTcan_02960_1s_mrna	N-alpha-acetyltransferase 10 [Toxocara canis]	0.174303	0	0	0	0.396984	0	0.815698	0.999592	0.439068	-1.18748	down
Tcan_12299	gnlWGS:JPKZTcan_12299_1s_mrna	hypothetical protein Tcan_12299 [Toxocara canis]	0.300435	0.749996	0.509487	1.79479	1.44301	0.313088	0.323544	0.999592	0.439304	-1.18671	down
Tcan_07355	gnlWGS:JPKZTcan_07355_1s_mrna	DNA replication ATP-dependent helicase/nuclease DNA2 [Toxocara canis]	0.080115	0	0	0.182357	0	0	0.83064	0.999592	0.439331	-1.18662	down
Tcan_11870	gnlWGS:JPKZTcan_11870_1s_mrna	hypothetical protein Tcan_11870 [Toxocara canis]	10.2172	0	0	12.3509	10.8862	0	0.750627	0.999592	0.439694	-1.18543	down
Tcan_11604	gnlWGS:JPKZTcan_11604_1s_mrna	hypothetical protein Tcan_11604, partial [Toxocara canis]	0.269701	0	0.12948	0	0.749279	0.156745	0.616905	0.999592	0.440585	-1.18251	down
Tcan_12305	gnlWGS:JPKZTcan_12305_1s_mrna	Polycystin-2, partial [Toxocara canis]	0	0.039977	0.048202	0.142051	0.058003	0	0.709155	0.999592	0.440776	-1.18188	down
Tcan_12745	gnlWGS:JPKZTcan_12745_1s_mrna	F-box only protein 47 [Toxocara canis]	0	0.042909	0	0	0.097274	0	0.777265	0.999592	0.441115	-1.18077	down
Tcan_07299	gnlWGS:JPKZTcan_07299_1s_mrna	hypothetical protein Tcan_07299 [Toxocara canis]	2.12617	0.829902	0.910106	3.26051	4.04348	1.42498	0.0654725	0.999592	0.442913	-1.1749	down
Tcan_12314	gnlWGS:JPKZTcan_12314_1s_mrna	hypothetical protein Tcan_12314 [Toxocara canis]	0.524889	0.330203	0	1.05901	0.869557	0	0.569521	0.999592	0.443383	-1.17337	down
Tcan_16105	gnlWGS:JPKZTcan_16105_1s_mrna	hypothetical protein Tcan_16105 [Toxocara canis]	0.433383	0.902304	1.11168	2.14715	2.34298	1.02632	0.136945	0.999592	0.443649	-1.17251	down
Tcan_05033	gnlWGS:JPKZTcan_05033_1s_mrna	hypothetical protein Tcan_05033 [Toxocara canis]	0.221524	0.37985	0	0.34042	0.726533	0.28843	0.322293	0.999592	0.443693	-1.17237	down
Tcan_04652	gnlWGS:JPKZTcan_04652_1s_mrna	hypothetical protein Tcan_04652 [Toxocara canis]	0	0	0.110602	0	0.149082	0.10013	0.752842	0.999592	0.443807	-1.172	down
Tcan_01236	gnlWGS:JPKZTcan_01236_1s_mrna	Uncharacterized protein K02A2.6, partial [Toxocara canis]	0.195334	0.1422	0.159154	0.616062	0.332568	0.168772	0.22993	0.999592	0.444503	-1.16974	down
Tcan_07598	gnlWGS:JPKZTcan_07598_1s_mrna	hypothetical protein Tcan_07598 [Toxocara canis]	0.279533	0.181012	0	0.276605	0.601671	0.15751	0.305427	0.999592	0.444633	-1.16931	down
Tcan_09442	gnlWGS:JPKZTcan_09442_1s_mrna	hypothetical protein Tcan_09442 [Toxocara canis]	0.435737	0	0.342969	0.968717	0.514479	0.26416	0.391117	0.999592	0.445648	-1.16602	down
Tcan_10264	gnlWGS:JPKZTcan_10264_1s_mrna	hypothetical protein Tcan_10264 [Toxocara canis]	0.284254	0.421132	0.044479	0.80378	0.628618	0.249433	0.234391	0.999592	0.445862	-1.16533	down
Tcan_01252	gnlWGS:JPKZTcan_01252_1s_mrna	Craniofacial development protein 2, partial [Toxocara canis]	0.136697	0.147102	0.10453	0.300377	0.502844	0.066456	0.239379	0.999592	0.446521	-1.1632	down
Tcan_14205	gnlWGS:JPKZTcan_14205_1s_mrna	hypothetical protein Tcan_14205 [Toxocara canis]	0	0.127716	0	0.101971	0	0.18395	0.698799	0.999592	0.446683	-1.16268	down
Tcan_15192	gnlWGS:JPKZTcan_15192_1s_mrna	hypothetical protein Tcan_15192 [Toxocara canis]	0.066734	0	0	0.115408	0	0.033743	0.604408	0.999592	0.447426	-1.16028	down
Tcan_18461	gnlWGS:JPKZTcan_18461_1s_mrna	hypothetical protein Tcan_18461 [Toxocara canis]	0.851976	0.663522	0	1.71649	0.606123	1.06342	0.289037	0.999592	0.447573	-1.15981	down
Tcan_00885	gnlWGS:JPKZTcan_00885_1s_mrna	hypothetical protein Tcan_00885, partial [Toxocara canis]	0.173535	0.459396	0.079203	0.568061	0.552615	0.469664	0.179646	0.999592	0.447787	-1.15911	down
Tcan_00697	gnlWGS:JPKZTcan_00697_1s_mrna	hypothetical protein Tcan_00697, partial [Toxocara canis]	1.63923	1.08679	0.18887	2.79565	3.51416	0.195969	0.273604	0.999592	0.448047	-1.15828	down
Tcan_04269	gnlWGS:JPKZTcan_04269_1s_mrna	hypothetical protein Tcan_04269 [Toxocara canis]	0.476769	0.246287	0.125058	0.619849	0.665002	0.60308	0.155414	0.999592	0.449229	-1.15448	down
Tcan_00273	gnlWGS:JPKZTcan_00273_1s_mrna	hypothetical protein Tcan_00273 [Toxocara canis]	0.354026	0	0	0	0.644397	0.141141	0.621212	0.999592	0.45068	-1.14983	down
Tcan_07405	gnlWGS:JPKZTcan_07405_1s_mrna	hypothetical protein Tcan_07405 [Toxocara canis]	0.674498	0	0.267894	1.20238	0.545526	0.342344	0.407458	0.999592	0.450852	-1.14927	down
Tcan_06258	gnlWGS:JPKZTcan_06258_1s_mrna	hypothetical protein Tcan_06258, partial [Toxocara canis]	0	0.260369	0	0	0	0.577304	0.694792	0.999592	0.451008	-1.14877	down
Tcan_02954	gnlWGS:JPKZTcan_02954_1s_mrna	hypothetical protein Tcan_02954 [Toxocara canis]	0	0.626508	0	0.1678	0.527053	0.693692	0.532873	0.999592	0.451197	-1.14817	down
Tcan_14175	gnlWGS:JPKZTcan_14175_1s_mrna	Homeobox protein ceh-20 [Toxocara canis]	0.303468	0	0	0.183111	0.306905	0.182417	0.47683	0.999592	0.451298	-1.14785	down
Tcan_12802	gnlWGS:JPKZTcan_12802_1s_mrna	hypothetical protein Tcan_12802 [Toxocara canis]	0	0	0.177653	0.392457	0	0	0.880591	0.999592	0.452669	-1.14347	down
Tcan_14023	gnlWGS:JPKZTcan_14023_1s_mrna	Uridine kinase-like protein 5 [Toxocara canis]	0.519814	0	0.581691	0.377749	0.989712	1.0652	0.380535	0.999592	0.452799	-1.14306	down
Tcan_13577	gnlWGS:JPKZTcan_13577_1s_mrna	hypothetical protein Tcan_13577 [Toxocara canis]	0.43386	0.247732	0.021147	0.657744	0.707651	0.185218	0.208385	0.999592	0.453201	-1.14178	down
Tcan_00145	gnlWGS:JPKZTcan_00145_1s_mrna	hypothetical protein Tcan_00145 [Toxocara canis]	0.207524	0.376886	0.107434	0.392869	0.519987	0.613441	0.290229	0.999592	0.453283	-1.14152	down
Tcan_11541	gnlWGS:JPKZTcan_11541_1s_mrna	hypothetical protein Tcan_11541 [Toxocara canis]	0.289578	0.673795	0.638578	1.39346	0.935263	1.20473	0.181462	0.999592	0.453367	-1.14125	down
Tcan_11697	gnlWGS:JPKZTcan_11697_1s_mrna	Phosphoenolpyruvate carboxykinase [GTP] [Toxocara canis]	0.071361	0.303896	0.102066	0.710225	0.21734	0.124999	0.255346	0.999592	0.453486	-1.14087	down
Tcan_16406	gnlWGS:JPKZTcan_16406_1s_mrna	Cuticle collagen sqt-1 [Toxocara canis]	0.097683	0.042643	0.025201	0.135373	0.080425	0.148738	0.158199	0.999592	0.454076	-1.13899	down
Tcan_11177	gnlWGS:JPKZTcan_11177_1s_mrna	hypothetical protein Tcan_11177 [Toxocara canis]	0.726091	0.107987	0.035874	0.398422	1.39508	0.121304	0.418543	0.999592	0.454329	-1.13819	down
Tcan_11313	gnlWGS:JPKZTcan_11313_1s_mrna	hypothetical protein Tcan_11313 [Toxocara canis]	0.487311	0.273497	0	0.60882	0.707751	0.356997	0.384454	0.999592	0.454602	-1.13732	down
Tcan_17533	gnlWGS:JPKZTcan_17533_1s_mrna	Cuticle collagen 10 [Toxocara canis]	0.169716	0	0	0.256753	0	0.116418	0.568624	0.999592	0.454794	-1.13671	down
Tcan_16544	gnlWGS:JPKZTcan_16544_1s_mrna	hypothetical protein Tcan_16544 [Toxocara canis]	0.411295	0.5221	0.30611	1.24716	0.695128	0.778509	0.157869	0.999592	0.455568	-1.13426	down
Tcan_01269	gnlWGS:JPKZTcan_01269_1s_mrna	hypothetical protein Tcan_01269, partial [Toxocara canis]	0.850618	0.408552	0	1.25623	0.881666	0.620663	0.297367	0.999592	0.45646	-1.13144	down
Tcan_05643	gnlWGS:JPKZTcan_05643_1s_mrna	Bestrophin -like protein 22 [Toxocara canis]	0.441146	0.249012	0	0.282138	0.84324	0.386521	0.356068	0.999592	0.456484	-1.13136	down
Tcan_15055	gnlWGS:JPKZTcan_15055_1s_mrna	C-type lectin protein [Toxocara canis]	0	0.425122	0	0.930329	0	0	0.767431	0.999592	0.456959	-1.12986	down
Tcan_14222	gnlWGS:JPKZTcan_14222_1s_mrna	hypothetical protein Tcan_14222 [Toxocara canis]	0.284881	0.802673	1.12299	2.07486	1.43485	1.32637	0.225326	0.999592	0.457094	-1.12944	down
Tcan_06805	gnlWGS:JPKZTcan_06805_1s_mrna	hypothetical protein Tcan_06805 [Toxocara canis]	0	0.15095	0	0.330043	0	0	0.800933	0.999592	0.457365	-1.12858	down
Tcan_09123	gnlWGS:JPKZTcan_09123_1s_mrna	hypothetical protein Tcan_09123 [Toxocara canis]	0.623558	0	0.084264	0.68133	0.866251	0	0.558949	0.999592	0.457373	-1.12856	down
Tcan_09924	gnlWGS:JPKZTcan_09924_1s_mrna	hypothetical protein Tcan_09924 [Toxocara canis]	1.38364	0	0	1.02412	1.98899	0	0.762281	0.999592	0.459207	-1.12278	down
Tcan_08842	gnlWGS:JPKZTcan_08842_1s_mrna	hypothetical protein Tcan_08842 [Toxocara canis]	0.43273	0.143188	0.119461	0.528893	0.695585	0.28976	0.219418	0.999592	0.459227	-1.12272	down
Tcan_00919	gnlWGS:JPKZTcan_00919_1s_mrna	hypothetical protein Tcan_00919, partial [Toxocara canis]	0.751121	0.211163	0.264273	1.7406	0.266226	0.661871	0.317198	0.999592	0.459609	-1.12152	down
Tcan_01944	gnlWGS:JPKZTcan_01944_1s_mrna	hypothetical protein Tcan_01944 [Toxocara canis]	0	1.08274	0	0.851821	1.50265	0	0.705791	0.999592	0.459868	-1.12071	down
Tcan_10400	gnlWGS:JPKZTcan_10400_1s_mrna	hypothetical protein Tcan_10400 [Toxocara canis]	0.583501	0.200548	0	0.408406	0.760544	0.534861	0.365811	0.999592	0.460174	-1.11975	down
Tcan_18352	gnlWGS:JPKZTcan_18352_1s_mrna	hypothetical protein Tcan_18352 [Toxocara canis]	0.670379	0.269968	0.149827	0.848903	1.18182	0.33817	0.241875	0.999592	0.460204	-1.11965	down
Tcan_08138	gnlWGS:JPKZTcan_08138_1s_mrna	hypothetical protein Tcan_08138 [Toxocara canis]	0.303065	0	0	0.458024	0.200262	0	0.63522	0.999592	0.460385	-1.11909	down
Tcan_17305	gnlWGS:JPKZTcan_17305_1s_mrna	Dachshund -like protein 1 [Toxocara canis]	0.850306	0.517622	0.146494	1.17177	1.61361	0.503352	0.111998	0.999592	0.460488	-1.11876	down
Tcan_07672	gnlWGS:JPKZTcan_07672_1s_mrna	hypothetical protein Tcan_07672 [Toxocara canis]	2.04131	0	0.848136	1.85597	2.9227	1.49333	0.370968	0.999592	0.46069	-1.11813	down
Tcan_04092	gnlWGS:JPKZTcan_04092_1s_mrna	hypothetical protein Tcan_04092 [Toxocara canis]	0.304491	0.418942	0	0.394749	1.08293	0.092104	0.448246	0.999592	0.460849	-1.11763	down
Tcan_16189	gnlWGS:JPKZTcan_16189_1s_mrna	hypothetical protein Tcan_16189 [Toxocara canis]	0.827367	1.48257	0.821735	2.31595	2.94068	1.53875	0.0887424	0.999592	0.460854	-1.11762	down
Tcan_02702	gnlWGS:JPKZTcan_02702_1s_mrna	hypothetical protein Tcan_02702 [Toxocara canis]	0.09834	0.173251	0.453754	0.356704	0.514361	0.70264	0.392539	0.999592	0.460915	-1.11743	down
Tcan_00157	gnlWGS:JPKZTcan_00157_1s_mrna	hypothetical protein Tcan_00157 [Toxocara canis]	0.845286	0.455189	0.408321	1.64375	1.07391	0.984961	0.118391	0.999592	0.46151	-1.11557	down
Tcan_18478	gnlWGS:JPKZTcan_18478_1s_mrna	hypothetical protein Tcan_18478 [Toxocara canis]	0.769785	1.65409	1.19748	4.45758	1.44672	1.93168	0.121504	0.999592	0.462145	-1.11358	down
Tcan_15723	gnlWGS:JPKZTcan_15723_1s_mrna	hypothetical protein Tcan_15723 [Toxocara canis]	0.18588	0.281752	0.19188	0.107503	1.11314	0.205965	0.413239	0.999592	0.462293	-1.11312	down
Tcan_04733	gnlWGS:JPKZTcan_04733_1s_mrna	Cuticle collagen lon-3 [Toxocara canis]	0	0.494042	0.418194	0.663701	0.174163	1.13468	0.441424	0.999592	0.462467	-1.11258	down
Tcan_08909	gnlWGS:JPKZTcan_08909_1s_mrna	hypothetical protein Tcan_08909 [Toxocara canis]	0.22978	0	0	0.174952	0.223157	0.098707	0.468601	0.999592	0.462505	-1.11246	down
Tcan_00243	gnlWGS:JPKZTcan_00243_1s_mrna	hypothetical protein Tcan_00243 [Toxocara canis]	0.273719	0.442265	0.417267	1.1517	0.997446	0.298808	0.207812	0.999592	0.462938	-1.11111	down
Tcan_00399	gnlWGS:JPKZTcan_00399_1s_mrna	hypothetical protein Tcan_00399, partial [Toxocara canis]	0.133111	0.053376	0.018442	0.186877	0.243558	0.012211	0.613338	0.999592	0.462964	-1.11103	down
Tcan_11045	gnlWGS:JPKZTcan_11045_1s_mrna	Cuticle collagen sqt-1 [Toxocara canis]	0.810201	0.15772	0.198428	1.35904	0.747397	0.412257	0.176478	0.999592	0.463077	-1.11068	down
Tcan_01201	gnlWGS:JPKZTcan_01201_1s_mrna	hypothetical protein Tcan_01201, partial [Toxocara canis]	0	0.097703	0	0.094687	0.116265	0	0.838758	0.999592	0.463153	-1.11044	down
Tcan_13815	gnlWGS:JPKZTcan_13815_1s_mrna	hypothetical protein Tcan_13815 [Toxocara canis]	1.03462	0	1.28553	1.10098	0.952903	2.95434	0.438166	0.999592	0.463268	-1.11008	down
Tcan_07033	gnlWGS:JPKZTcan_07033_1s_mrna	hypothetical protein Tcan_07033, partial [Toxocara canis]	0.435058	0.20872	0.228378	0.85611	0.913614	0.11255	0.161475	0.999592	0.463352	-1.10982	down
Tcan_15023	gnlWGS:JPKZTcan_15023_1s_mrna	hypothetical protein Tcan_15023 [Toxocara canis]	0.09442	0	0.352511	0.303243	0.134261	0.526902	0.549753	0.999592	0.463426	-1.10959	down
Tcan_10473	gnlWGS:JPKZTcan_10473_1s_mrna	hypothetical protein Tcan_10473 [Toxocara canis]	0.029542	0	0.054036	0.078906	0.101426	0	0.718344	0.999592	0.463467	-1.10946	down
Tcan_06772	gnlWGS:JPKZTcan_06772_1s_mrna	Cuticlin-1 [Toxocara canis]	0.16431	0	0	0.089215	0.265303	0	0.661737	0.999592	0.463474	-1.10944	down
Tcan_12279	gnlWGS:JPKZTcan_12279_1s_mrna	hypothetical protein Tcan_12279 [Toxocara canis]	1.02513	0.366939	0.535989	1.13818	1.50683	1.51125	0.108073	0.999592	0.463892	-1.10814	down
Tcan_05863	gnlWGS:JPKZTcan_05863_1s_mrna	hypothetical protein Tcan_05863 [Toxocara canis]	1.15538	1.65996	0.466691	2.40351	2.50833	2.16001	0.0862618	0.999592	0.464097	-1.1075	down
Tcan_03738	gnlWGS:JPKZTcan_03738_1s_mrna	hypothetical protein Tcan_03738 [Toxocara canis]	0.520854	0.436759	0.203471	0.528439	1.18536	0.78712	0.162824	0.999592	0.464263	-1.10699	down
Tcan_11276	gnlWGS:JPKZTcan_11276_1s_mrna	hypothetical protein Tcan_11276 [Toxocara canis]	0.897502	0.129665	0.046487	1.00643	1.11461	0.190107	0.257039	0.999592	0.464555	-1.10608	down
Tcan_01179	gnlWGS:JPKZTcan_01179_1s_mrna	unnamed protein product [Toxocara canis]	0.53301	0	0.508941	1.18477	1.05437	0	0.646212	0.999592	0.465335	-1.10366	down
Tcan_09859	gnlWGS:JPKZTcan_09859_1s_mrna	hypothetical protein Tcan_09859 [Toxocara canis]	0.189086	0.281054	0	0	0.839665	0.170332	0.587315	0.999592	0.465487	-1.10319	down
Tcan_00296	gnlWGS:JPKZTcan_00296_1s_mrna	hypothetical protein Tcan_00296, partial [Toxocara canis]	0	0.416424	0	0.308624	0.327708	0.256903	0.517141	0.999592	0.466198	-1.10099	down
Tcan_07142	gnlWGS:JPKZTcan_07142_1s_mrna	Inner centromere protein A [Toxocara canis]	0.065796	0.063514	0.063363	0.088839	0.210617	0.112898	0.212177	0.999592	0.467251	-1.09773	down
Tcan_17757	gnlWGS:JPKZTcan_17757_1s_mrna	hypothetical protein Tcan_17757 [Toxocara canis]	0.128859	0.06277	0.354949	0.275142	0.482398	0.41153	0.41954	0.999592	0.467532	-1.09686	down
Tcan_12665	gnlWGS:JPKZTcan_12665_1s_mrna	Zinc metalloproteinase nas-1 [Toxocara canis]	0.035877	0	0	0	0.076704	0	0.793702	0.999592	0.467733	-1.09624	down
Tcan_15353	gnlWGS:JPKZTcan_15353_1s_mrna	hypothetical protein Tcan_15353 [Toxocara canis]	0.424845	0.118221	0.465385	0.893751	0.847568	0.412648	0.242803	0.999592	0.468183	-1.09486	down
Tcan_09255	gnlWGS:JPKZTcan_09255_1s_mrna	hypothetical protein Tcan_09255 [Toxocara canis]	0.170964	0	0.124629	0	0.628843	0	0.76447	0.999592	0.470059	-1.08909	down
Tcan_07993	gnlWGS:JPKZTcan_07993_1s_mrna	hypothetical protein Tcan_07993, partial [Toxocara canis]	0.101683	0.109383	0.120854	0.127316	0.218621	0.359982	0.39943	0.999592	0.470196	-1.08867	down
Tcan_00845	gnlWGS:JPKZTcan_00845_1s_mrna	hypothetical protein Tcan_00845, partial [Toxocara canis]	0.179899	0.215254	0.243313	0.472598	0.700728	0.184061	0.383911	0.999592	0.470364	-1.08815	down
Tcan_13999	gnlWGS:JPKZTcan_13999_1s_mrna	hypothetical protein Tcan_13999 [Toxocara canis]	0.117214	0.087723	0	0.130412	0.159964	0.144995	0.35285	0.999592	0.470718	-1.08706	down
Tcan_07464	gnlWGS:JPKZTcan_07464_1s_mrna	unnamed protein product [Toxocara canis]	0.573784	0.367527	0.435742	1.00817	0.937953	0.978193	0.130521	0.999592	0.470898	-1.08651	down
Tcan_00162	gnlWGS:JPKZTcan_00162_1s_mrna	Putative uncharacterized transposon-derived protein F52C9.6 [Toxocara canis]	4.17614	1.47158	0.880485	5.1895	8.15982	0.498427	0.23594	0.999592	0.471427	-1.08489	down
Tcan_07388	gnlWGS:JPKZTcan_07388_1s_mrna	hypothetical protein Tcan_07388 [Toxocara canis]	0.193679	0.5636	0.090311	0.473083	0.708406	0.615297	0.226245	0.999592	0.471726	-1.08398	down
Tcan_14850	gnlWGS:JPKZTcan_14850_1s_mrna	hypothetical protein Tcan_14850 [Toxocara canis]	0.289711	0.41831	0	0.428854	0.985708	0.086335	0.443207	0.999592	0.471732	-1.08396	down
Tcan_10038	gnlWGS:JPKZTcan_10038_1s_mrna	Vesicle-associated membrane protein-associated protein A [Toxocara canis]	0.70435	0.342995	0.151828	0.78252	1.2886	0.469402	0.109568	0.999592	0.472018	-1.08309	down
Tcan_18171	gnlWGS:JPKZTcan_18171_1s_mrna	hypothetical protein Tcan_18171 [Toxocara canis]	0.475276	0.678525	0.182526	1.0775	1.13022	0.623259	0.0857031	0.999592	0.472037	-1.08303	down
Tcan_04887	gnlWGS:JPKZTcan_04887_1s_mrna	hypothetical protein Tcan_04887 [Toxocara canis]	0.210024	0	0	0.253559	0	0.191353	0.597983	0.999592	0.472057	-1.08297	down
Tcan_11746	gnlWGS:JPKZTcan_11746_1s_mrna	Cuticle collagen dpy-5 [Toxocara canis]	0.076065	0	0	0.092078	0.023352	0.045686	0.495676	0.999592	0.472113	-1.0828	down
Tcan_13074	gnlWGS:JPKZTcan_13074_1s_mrna	hypothetical protein Tcan_13074 [Toxocara canis]	0.328913	0.061728	0.113896	0.196318	0.327758	0.540493	0.442025	0.999592	0.473935	-1.07724	down
Tcan_15121	gnlWGS:JPKZTcan_15121_1s_mrna	hypothetical protein Tcan_15121 [Toxocara canis]	0.126942	0.311671	0	0.622776	0.206918	0.095736	0.513056	0.999592	0.473956	-1.07718	down
Tcan_10291	gnlWGS:JPKZTcan_10291_1s_mrna	hypothetical protein Tcan_10291 [Toxocara canis]	0	0.048524	0	0	0.102272	0	0.851368	0.999592	0.47446	-1.07564	down
Tcan_07097	gnlWGS:JPKZTcan_07097_1s_mrna	hypothetical protein Tcan_07097 [Toxocara canis]	0.060161	0.184848	0.149541	0.504263	0.126673	0.200428	0.349774	0.999592	0.474582	-1.07527	down
Tcan_03150	gnlWGS:JPKZTcan_03150_1s_mrna	Receptor-type tyrosine-protein phosphatase C [Toxocara canis]	0.278592	0.352598	0.25903	0.689734	0.749975	0.43401	0.154303	0.999592	0.475109	-1.07367	down
Tcan_03299	gnlWGS:JPKZTcan_03299_1s_mrna	hypothetical protein Tcan_03299 [Toxocara canis]	0	0	0.299285	0	0.554318	0.074989	0.804754	0.999592	0.475579	-1.07224	down
Tcan_00752	gnlWGS:JPKZTcan_00752_1s_mrna	hypothetical protein Tcan_00752, partial [Toxocara canis]	0.637648	0.467945	0.194614	0.916794	1.41831	0.397695	0.22868	0.999592	0.475778	-1.07164	down
Tcan_01178	gnlWGS:JPKZTcan_01178_1s_mrna	unnamed protein product [Toxocara canis]	0.415048	0	0.114492	0.71703	0.393993	0	0.633952	0.999592	0.476624	-1.06908	down
Tcan_00473	gnlWGS:JPKZTcan_00473_1s_mrna	Uncharacterized protein K02A2.6, partial [Toxocara canis]	0.563477	0.370085	0.252228	0.904101	1.35386	0.229628	0.167368	0.999592	0.476682	-1.0689	down
Tcan_17959	gnlWGS:JPKZTcan_17959_1s_mrna	MAP kinase-activated protein kinase 2 [Toxocara canis]	0.277234	0.18145	0.087188	0.434174	0.481746	0.227317	0.118329	0.999592	0.477479	-1.06649	down
Tcan_10476	gnlWGS:JPKZTcan_10476_1s_mrna	Long-chain-fatty-acid--CoA ligase 5 [Toxocara canis]	0.137861	0.150346	0.062463	0.440771	0.293617	0	0.487727	0.999592	0.4775	-1.06643	down
Tcan_07029	gnlWGS:JPKZTcan_07029_1s_mrna	Uncharacterized protein F52C9.5 [Toxocara canis]	0	0.126296	0	0.122349	0	0.141915	0.621099	0.999592	0.477916	-1.06517	down
Tcan_15736	gnlWGS:JPKZTcan_15736_1s_mrna	hypothetical protein Tcan_15736 [Toxocara canis]	0.102996	0.188222	0.20869	0.0163	0.75513	0.27451	0.508176	0.999592	0.477951	-1.06507	down
Tcan_06516	gnlWGS:JPKZTcan_06516_1s_mrna	Tyrosine-protein phosphatase non-receptor type 20 [Toxocara canis]	0.034814	0	0.026836	0.128974	0	0	0.763325	0.999592	0.478003	-1.06491	down
Tcan_07167	gnlWGS:JPKZTcan_07167_1s_mrna	hypothetical protein Tcan_07167 [Toxocara canis]	0.13724	0.126874	0	0.175959	0.336402	0.039587	0.427511	0.999592	0.478512	-1.06337	down
Tcan_09684	gnlWGS:JPKZTcan_09684_1s_mrna	Casein kinase I isoform alpha [Toxocara canis]	0.085982	0	0	0	0.082187	0.09748	0.731652	0.999592	0.478563	-1.06322	down
Tcan_17888	gnlWGS:JPKZTcan_17888_1s_mrna	hypothetical protein Tcan_17888 [Toxocara canis]	1.12411	0.886839	0.497468	2.05367	2.35808	0.81908	0.0776219	0.999592	0.479545	-1.06026	down
Tcan_18887	gnlWGS:JPKZTcan_18887_1s_mrna	hypothetical protein Tcan_18887 [Toxocara canis]	0.285886	0.287292	0	0.359202	0.677594	0.158396	0.385646	0.999592	0.47957	-1.06019	down
Tcan_04774	gnlWGS:JPKZTcan_04774_1s_mrna	Mitogen-activated protein kinase 8 [Toxocara canis]	0.163539	0	0	0.209723	0.131276	0	0.65541	0.999592	0.479588	-1.06013	down
Tcan_05784	gnlWGS:JPKZTcan_05784_1s_mrna	hypothetical protein Tcan_05784 [Toxocara canis]	0.177354	0.779322	0.236045	1.09875	0.713138	0.673925	0.287094	0.999592	0.47981	-1.05946	down
Tcan_01321	gnlWGS:JPKZTcan_01321_1s_mrna	unnamed protein product [Toxocara canis]	0.898905	0.363097	0	0.918646	1.24019	0.470812	0.420581	0.999592	0.479914	-1.05915	down
Tcan_09549	gnlWGS:JPKZTcan_09549_1s_mrna	hypothetical protein Tcan_09549 [Toxocara canis]	0	0.454532	0.206332	0.555342	0.593418	0.226742	0.485343	0.999592	0.480453	-1.05753	down
Tcan_06766	gnlWGS:JPKZTcan_06766_1s_mrna	hypothetical protein Tcan_06766 [Toxocara canis]	0.524124	0.248794	0	0.714535	0.826996	0.065005	0.451968	0.999592	0.481108	-1.05557	down
Tcan_13322	gnlWGS:JPKZTcan_13322_1s_mrna	putative G-protein coupled receptor tkr-1 [Toxocara canis]	0.946818	0.860168	0.348923	2.04987	1.67787	0.749131	0.0738174	0.999592	0.481566	-1.05419	down
Tcan_14159	gnlWGS:JPKZTcan_14159_1s_mrna	hypothetical protein Tcan_14159 [Toxocara canis]	0	0.306145	0	0.497595	0	0.13792	0.695257	0.999592	0.481727	-1.05371	down
Tcan_17378	gnlWGS:JPKZTcan_17378_1s_mrna	hypothetical protein Tcan_17378 [Toxocara canis]	1.20548	0.402894	0.298178	0.984464	2.30612	0.66604	0.320909	0.999592	0.481864	-1.0533	down
Tcan_00533	gnlWGS:JPKZTcan_00533_1s_mrna	hypothetical protein Tcan_00533, partial [Toxocara canis]	0.797667	0.012271	0.083524	0.494991	0.948344	0.407616	0.386082	0.999592	0.482704	-1.05079	down
Tcan_01621	gnlWGS:JPKZTcan_01621_1s_mrna	hypothetical protein Tcan_01621 [Toxocara canis]	0.987552	0.828163	0.59833	1.5621	2.48934	0.944539	0.071111	0.999592	0.483197	-1.04932	down
Tcan_06292	gnlWGS:JPKZTcan_06292_1s_mrna	hypothetical protein Tcan_06291 [Toxocara canis]	0	0.142071	0	0	0.241276	0.052728	0.758442	0.999592	0.483228	-1.04922	down
Tcan_05302	gnlWGS:JPKZTcan_05302_1s_mrna	Mu-type opioid receptor [Toxocara canis]	0	0.576151	0.526413	0.866895	0.444162	0.970434	0.452694	0.999592	0.483265	-1.04911	down
Tcan_02191	gnlWGS:JPKZTcan_02191_1s_mrna	Tyrosine phosphatase-like protein J1 [Toxocara canis]	0.644316	0.35353	0	1.28749	0.775318	0	0.576083	0.999592	0.483731	-1.04772	down
Tcan_03763	gnlWGS:JPKZTcan_03763_1s_mrna	ABC transporter ATP-binding protein/permease wht-1 [Toxocara canis]	0.276632	0.398485	0.119895	0.807378	0.671306	0.164127	0.167116	0.999592	0.483934	-1.04712	down
Tcan_16567	gnlWGS:JPKZTcan_16567_1s_mrna	hypothetical protein Tcan_16567 [Toxocara canis]	0.010899	0.493703	0.259409	0.860296	0.481822	0.233517	0.453767	0.999592	0.484891	-1.04427	down
Tcan_07401	gnlWGS:JPKZTcan_07401_1s_mrna	hypothetical protein Tcan_07401 [Toxocara canis]	0.048705	0.043114	0	0	0.189256	0	0.707079	0.999592	0.485158	-1.04347	down
Tcan_05217	gnlWGS:JPKZTcan_05217_1s_mrna	FERM and PDZ domain-containing protein 4 [Toxocara canis]	2.48983	0.948027	0	1.77936	3.57416	1.73228	0.345195	0.999592	0.485176	-1.04342	down
Tcan_01326	gnlWGS:JPKZTcan_01326_1s_mrna	hypothetical protein Tcan_01326, partial [Toxocara canis]	0.205919	0.067003	0.136884	0.37618	0.176193	0.291435	0.35906	0.999592	0.485663	-1.04197	down
Tcan_15298	gnlWGS:JPKZTcan_15298_1s_mrna	hypothetical protein Tcan_15298 [Toxocara canis]	0	0	0.075619	0	0.155443	0	0.854163	0.999592	0.486474	-1.03956	down
Tcan_08144	gnlWGS:JPKZTcan_08144_1s_mrna	Bidirectional sugar transporter SWEET10 [Toxocara canis]	0	0.3195	0.223966	0.448578	0.391079	0.277453	0.493802	0.999592	0.486493	-1.03951	down
Tcan_18611	gnlWGS:JPKZTcan_18611_1s_mrna	Putative transporter, partial [Toxocara canis]	0.113235	0	0	0.051922	0.088893	0.091892	0.518687	0.999592	0.486599	-1.03919	down
Tcan_08840	gnlWGS:JPKZTcan_08840_1s_mrna	hypothetical protein Tcan_08840 [Toxocara canis]	0.651865	0.656922	0.9346	1.23908	0.864137	2.50087	0.197408	0.999592	0.48726	-1.03724	down
Tcan_16121	gnlWGS:JPKZTcan_16121_1s_mrna	hypothetical protein Tcan_16121 [Toxocara canis]	2.62894	0	0	2.32625	3.06727	0	0.644667	0.999592	0.487426	-1.03674	down
Tcan_06362	gnlWGS:JPKZTcan_06362_1s_mrna	Splicing regulator RBM11 [Toxocara canis]	0.216732	0	0.212993	0.164711	0.221663	0.494525	0.436078	0.999592	0.487826	-1.03556	down
Tcan_18247	gnlWGS:JPKZTcan_18247_1s_mrna	Phosphatidylinositol transfer protein alpha isoform [Toxocara canis]	0.237338	0.220755	0	0.395352	0.543509	0	0.588609	0.999592	0.487924	-1.03527	down
Tcan_11910	gnlWGS:JPKZTcan_11910_1s_mrna	hypothetical protein Tcan_11910 [Toxocara canis]	0.252743	0	0	0.180283	0.332544	0.004996	0.578813	0.999592	0.488088	-1.03479	down
Tcan_09900	gnlWGS:JPKZTcan_09900_1s_mrna	Protein lin-28 [Toxocara canis]	0	0.171608	0.333391	0.374493	0.229006	0.430787	0.561649	0.999592	0.488259	-1.03428	down
Tcan_03467	gnlWGS:JPKZTcan_03467_1s_mrna	UDP-glucose 4-epimerase [Toxocara canis]	0.52933	0.625284	0.206519	1.27206	0.649088	0.864804	0.0726191	0.999592	0.488569	-1.03336	down
Tcan_06666	gnlWGS:JPKZTcan_06666_1s_mrna	hypothetical protein Tcan_06666 [Toxocara canis]	0.244486	0	0.263642	0.733519	0.306262	0	0.699097	0.999592	0.488688	-1.03302	down
Tcan_12874	gnlWGS:JPKZTcan_12874_1s_mrna	Methylmalonyl-CoA epimerase, mitochondrial [Toxocara canis]	1.04966	0.845117	0.853589	0.935373	2.23796	2.44717	0.0878236	0.999592	0.488989	-1.03213	down
Tcan_00849	gnlWGS:JPKZTcan_00849_1s_mrna	hypothetical protein Tcan_00849, partial [Toxocara canis]	0.688017	1.44336	0.767963	1.65114	1.25813	3.0176	0.148278	0.999592	0.489186	-1.03155	down
Tcan_12269	gnlWGS:JPKZTcan_12269_1s_mrna	hypothetical protein Tcan_12269 [Toxocara canis]	0.221613	0	0.111932	0.170583	0.279449	0.231319	0.490349	0.999592	0.489535	-1.03052	down
Tcan_17473	gnlWGS:JPKZTcan_17473_1s_mrna	hypothetical protein Tcan_17473 [Toxocara canis]	1.37895	0.182913	0	1.15755	2.0322	0	0.592982	0.999592	0.489648	-1.03018	down
Tcan_11653	gnlWGS:JPKZTcan_11653_1s_mrna	Major sperm protein 32 [Toxocara canis]	0.494825	0	0	0.2553	0.550499	0.204425	0.528372	0.999592	0.489817	-1.02968	down
Tcan_05371	gnlWGS:JPKZTcan_05371_1s_mrna	HORMA domain-containing protein 1 [Toxocara canis]	0	0	0.11612	0	0.237017	0	0.863222	0.999592	0.489923	-1.02937	down
Tcan_18750	gnlWGS:JPKZTcan_18750_1s_mrna	WW domain-containing oxidoreductase [Toxocara canis]	0.095405	0.030468	0.080901	0.069268	0.302034	0.050726	0.500093	0.999592	0.489953	-1.02928	down
Tcan_03621	gnlWGS:JPKZTcan_03621_1s_mrna	hypothetical protein Tcan_03621 [Toxocara canis]	1.37266	0.996549	0	1.06185	2.33982	1.42666	0.335249	0.999592	0.490689	-1.02712	down
Tcan_18430	gnlWGS:JPKZTcan_18430_1s_mrna	putative tyrosine decarboxylase 2 [Toxocara canis]	0.276061	0.263623	0	0.386811	0.504795	0.206808	0.350468	0.999592	0.49133	-1.02524	down
Tcan_03257	gnlWGS:JPKZTcan_03257_1s_mrna	hypothetical protein Tcan_03257 [Toxocara canis]	0	1.56384	1.78884	2.63975	2.16598	2.01709	0.490481	0.999592	0.491392	-1.02505	down
Tcan_02162	gnlWGS:JPKZTcan_02162_1s_mrna	Zinc metalloproteinase nas-15 [Toxocara canis]	0.131707	0	0	0	0.267914	0	0.771524	0.999592	0.491602	-1.02444	down
Tcan_17301	gnlWGS:JPKZTcan_17301_1s_mrna	hypothetical protein Tcan_17301 [Toxocara canis]	2.15244	0.58392	0.571777	2.94144	2.72415	1.05288	0.138068	0.999592	0.492395	-1.02211	down
Tcan_00161	gnlWGS:JPKZTcan_00161_1s_mrna	hypothetical protein Tcan_00161 [Toxocara canis]	0.575659	0.91631	0.384244	1.66214	1.10406	1.04413	0.110789	0.999592	0.492401	-1.02209	down
Tcan_15629	gnlWGS:JPKZTcan_15629_1s_mrna	Receptor expression-enhancing protein 5 [Toxocara canis]	0.164806	0	0.147315	0.161753	0.360151	0.111443	0.529017	0.999592	0.492812	-1.02089	down
Tcan_08906	gnlWGS:JPKZTcan_08906_1s_mrna	hypothetical protein Tcan_08906 [Toxocara canis]	0.179454	0	0	0	0.185018	0.178935	0.644684	0.999592	0.493069	-1.02014	down
Tcan_08038	gnlWGS:JPKZTcan_08038_1s_mrna	Trypsin inhibitor, partial [Toxocara canis]	0.427772	0.256585	0.371647	0.896524	0.685767	0.558817	0.152426	0.999592	0.493204	-1.01974	down
Tcan_10900	gnlWGS:JPKZTcan_10900_1s_mrna	hypothetical protein Tcan_10900 [Toxocara canis]	0	0	0.121948	0.247133	0	0	0.932909	0.999592	0.493451	-1.01902	down
Tcan_05679	gnlWGS:JPKZTcan_05679_1s_mrna	hypothetical protein Tcan_05679 [Toxocara canis]	0.258811	0.749696	0.440417	0.984117	1.56765	0.383193	0.265742	0.999592	0.493677	-1.01836	down
Tcan_10289	gnlWGS:JPKZTcan_10289_1s_mrna	hypothetical protein Tcan_10289 [Toxocara canis]	0.401828	0.491633	0.34768	1.79571	0.476757	0.241106	0.338442	0.999592	0.493775	-1.01807	down
Tcan_15603	gnlWGS:JPKZTcan_15603_1s_mrna	Receptor-type tyrosine-protein phosphatase eta [Toxocara canis]	0.369907	0.256793	0.877254	1.22708	1.1692	0.647706	0.237623	0.999592	0.494073	-1.0172	down
Tcan_12826	gnlWGS:JPKZTcan_12826_1s_mrna	hypothetical protein Tcan_12826 [Toxocara canis]	0.363071	0.076644	0.309036	0.595854	0.61779	0.298791	0.211172	0.999592	0.495063	-1.01432	down
Tcan_15762	gnlWGS:JPKZTcan_15762_1s_mrna	hypothetical protein Tcan_15762 [Toxocara canis]	0.377924	0	0.386555	0.735407	0.415444	0.39035	0.446208	0.999592	0.496028	-1.01151	down
Tcan_02223	gnlWGS:JPKZTcan_02223_1s_mrna	hypothetical protein Tcan_02223 [Toxocara canis]	5.89982	1.65973	2.97906	4.18355	9.53872	7.50082	0.0596459	0.999592	0.496563	-1.00995	down
Tcan_17974	gnlWGS:JPKZTcan_17974_1s_mrna	putative 26S proteasome non-ATPase regulatory subunit 9 [Toxocara canis]	0	0	0.055647	0	0	0.111958	0.904301	0.999592	0.497035	-1.00858	down
Tcan_14896	gnlWGS:JPKZTcan_14896_1s_mrna	hypothetical protein Tcan_14896 [Toxocara canis]	0.287423	0.250132	0	0.353959	0.427889	0.297555	0.37328	0.999592	0.498011	-1.00575	down
Tcan_11027	gnlWGS:JPKZTcan_11027_1s_mrna	hypothetical protein Tcan_11027 [Toxocara canis]	0.138519	0	0.069419	0.260624	0.156847	0	0.649941	0.999592	0.49809	-1.00552	down
Tcan_00038	gnlWGS:JPKZTcan_00038_1s_mrna	Adenosine kinase 1, partial [Toxocara canis]	0.376483	0.169839	0.403826	1.53752	0.36985	0	0.640974	0.999592	0.498146	-1.00536	down
Tcan_02119	gnlWGS:JPKZTcan_02119_1s_mrna	hypothetical protein Tcan_02119 [Toxocara canis]	5.56326	1.48161	1.13761	5.30631	6.29772	4.81752	0.0942645	0.999592	0.498277	-1.00498	down
Tcan_17273	gnlWGS:JPKZTcan_17273_1s_mrna	hypothetical protein Tcan_17273 [Toxocara canis]	1.20533	1.35596	0.828134	2.55042	3.29985	0.950179	0.099104	0.999592	0.498413	-1.00459	down
Tcan_12414	gnlWGS:JPKZTcan_12414_1s_mrna	Uncharacterized protein T05H10.3 [Toxocara canis]	0.833873	0.887295	0	1.26394	1.73024	0.454114	0.384938	0.999592	0.499137	-1.00249	down
Tcan_11762	gnlWGS:JPKZTcan_11762_1s_mrna	Cuticle collagen dpy-5 [Toxocara canis]	0.110849	0	0	0.221954	0	0	0.765695	0.999592	0.499423	-1.00166	down
Tcan_06263	gnlWGS:JPKZTcan_06263_1s_mrna	hypothetical protein Tcan_06263 [Toxocara canis]	0.436686	0.382204	0	0.343876	0.740652	0.553665	0.470618	0.999592	0.499874	-1.00036	down
Tcan_09222	gnlWGS:JPKZTcan_09222_1s_mrna	Cysteine-rich with EGF-like domain protein 2-B [Toxocara canis]	0.732911	0.272379	0.371973	0.996829	1.32217	0.436191	0.129243	0.999592	0.499879	-1.00035	down
Tcan_18390	gnlWGS:JPKZTcan_18390_1s_mrna	hypothetical protein Tcan_18390 [Toxocara canis]	0.356463	0.328197	0	0.193636	0.783691	0.391787	0.414941	0.999592	0.500075	-0.999783	down
Tcan_00104	gnlWGS:JPKZTcan_00104_1s_mrna	hypothetical protein Tcan_00104 [Toxocara canis]	0.102764	0	0.340793	0.152633	0.148507	0.585038	0.592062	0.999592	0.500528	-0.998477	down
Tcan_10572	gnlWGS:JPKZTcan_10572_1s_mrna	hypothetical protein Tcan_10572, partial [Toxocara canis]	0	0.077734	0.28996	0.300373	0.337342	0.096674	0.633643	0.999592	0.50068	-0.998039	down
Tcan_16920	gnlWGS:JPKZTcan_16920_1s_mrna	hypothetical protein Tcan_16920 [Toxocara canis]	1.05403	0.52127	0.195189	0.943942	1.56137	1.02023	0.0924232	0.999592	0.502188	-0.9937	down
Tcan_02286	gnlWGS:JPKZTcan_02286_1s_mrna		39.8036	3.59298	1.14687	31.2651	56.7189	0.714384	0.556732	0.999592	0.502189	-0.993697	down
Tcan_00250	gnlWGS:JPKZTcan_00250_1s_mrna	hypothetical protein Tcan_00250 [Toxocara canis]	1.21328	1.08194	0.801162	2.6869	2.39606	1.07882	0.0842639	0.999592	0.502514	-0.992766	down
Tcan_02005	gnlWGS:JPKZTcan_02005_1s_mrna	hypothetical protein Tcan_02005 [Toxocara canis]	0.820109	0.662175	0.65711	1.30362	2.23952	0.711364	0.129523	0.999592	0.502855	-0.991787	down
Tcan_10848	gnlWGS:JPKZTcan_10848_1s_mrna	putative palmitoyltransferase ZDHHC20 [Toxocara canis]	0.418788	0.163087	0	0.540488	0.214234	0.402205	0.384748	0.999592	0.502949	-0.991517	down
Tcan_12101	gnlWGS:JPKZTcan_12101_1s_mrna	E3 ubiquitin-protein ligase MARCH3 [Toxocara canis]	0.376076	0.284057	0.390317	0.609633	0.521521	0.957279	0.143578	0.999592	0.502985	-0.991413	down
Tcan_08896	gnlWGS:JPKZTcan_08896_1s_mrna	Cuticle collagen sqt-1 [Toxocara canis]	0	0.129235	0.114405	0.053134	0.074441	0.356789	0.535278	0.999592	0.50301	-0.991341	down
Tcan_05451	gnlWGS:JPKZTcan_05451_1s_mrna	Myosin-4 [Toxocara canis]	0.076662	0.037458	0	0.080541	0.136283	0.009934	0.497037	0.999592	0.503268	-0.990602	down
Tcan_07117	gnlWGS:JPKZTcan_07117_1s_mrna	Sperm-specific class P protein 34 [Toxocara canis]	0.191559	0	0	0.189386	0.190738	0	0.66495	0.999592	0.503938	-0.988681	down
Tcan_18682	gnlWGS:JPKZTcan_18682_1s_mrna	Myosin-4 [Toxocara canis]	0	0	0.03598	0.071337	0	0	0.83638	0.999592	0.504367	-0.987455	down
Tcan_00281	gnlWGS:JPKZTcan_00281_1s_mrna	Putative uncharacterized transposon-derived protein F52C9.6 [Toxocara canis]	1.02678	0.339388	0.16859	0.904932	1.84804	0.289213	0.343904	0.999592	0.504493	-0.987095	down
Tcan_09602	gnlWGS:JPKZTcan_09602_1s_mrna	hypothetical protein Tcan_09602 [Toxocara canis]	0.326679	0.227116	0	0.431601	0.471191	0.194911	0.371083	0.999592	0.504503	-0.987064	down
Tcan_05942	gnlWGS:JPKZTcan_05942_1s_mrna	Protein mom-2 [Toxocara canis]	0.246883	0.159718	0.783118	0.576991	1.12604	0.653933	0.365113	0.999592	0.504767	-0.986311	down
Tcan_10008	gnlWGS:JPKZTcan_10008_1s_mrna	hypothetical protein Tcan_10008 [Toxocara canis]	0.327817	0.35243	0.05993	0.665399	0.655833	0.144654	0.300967	0.999592	0.504935	-0.985831	down
Tcan_02943	gnlWGS:JPKZTcan_02943_1s_mrna	hypothetical protein Tcan_02943 [Toxocara canis]	1.12804	0.424854	0	1.27763	1.09428	0.702005	0.366326	0.999592	0.505184	-0.985118	down
Tcan_09246	gnlWGS:JPKZTcan_09246_1s_mrna	Cyclin-T2 [Toxocara canis]	0	0	0.05351	0.105903	0	0	0.930516	0.999592	0.505274	-0.984863	down
Tcan_00843	gnlWGS:JPKZTcan_00843_1s_mrna	hypothetical protein Tcan_00843, partial [Toxocara canis]	1.52157	0.662001	0.265841	2.02689	2.38401	0.436763	0.291455	0.999592	0.505276	-0.984856	down
Tcan_07895	gnlWGS:JPKZTcan_07895_1s_mrna	hypothetical protein Tcan_07895 [Toxocara canis]	0.199952	0.167252	0.106732	0.362005	0.440304	0.13508	0.180603	0.999592	0.505592	-0.983956	down
Tcan_17569	gnlWGS:JPKZTcan_17569_1s_mrna	hypothetical protein Tcan_17569 [Toxocara canis]	0	0.125531	0	0	0.247872	0	0.884473	0.999592	0.506435	-0.981552	down
Tcan_01243	gnlWGS:JPKZTcan_01243_1s_mrna	hypothetical protein Tcan_01243, partial [Toxocara canis]	0	0.132757	0.09724	0	0.454098	0	0.839198	0.999592	0.506492	-0.981389	down
Tcan_15179	gnlWGS:JPKZTcan_15179_1s_mrna	unnamed protein product [Toxocara canis]	11.4387	1.25657	0.237873	11.9288	13.4921	0.113676	0.572557	0.999592	0.506497	-0.981374	down
Tcan_09568	gnlWGS:JPKZTcan_09568_1s_mrna		0.352272	0.17156	0.510821	1.11924	0.46817	0.454425	0.289783	0.999592	0.506728	-0.980717	down
Tcan_01264	gnlWGS:JPKZTcan_01264_1s_mrna	hypothetical protein Tcan_01264, partial [Toxocara canis]	0.213629	0	0.165053	0.167982	0.390531	0.188764	0.507634	0.999592	0.506749	-0.980656	down
Tcan_02048	gnlWGS:JPKZTcan_02048_1s_mrna		1.45266	0.714577	0.251034	1.05555	1.43506	2.27221	0.167699	0.999592	0.507739	-0.97784	down
Tcan_16586	gnlWGS:JPKZTcan_16586_1s_mrna	hypothetical protein Tcan_16586 [Toxocara canis]	1.27846	0.163274	0.258478	0.706949	1.04146	1.60009	0.247032	0.999592	0.507755	-0.977795	down
Tcan_09525	gnlWGS:JPKZTcan_09525_1s_mrna	hypothetical protein Tcan_09525 [Toxocara canis]	0	0	0.251451	0.494939	0	0	0.863167	0.999592	0.508044	-0.976973	down
Tcan_08556	gnlWGS:JPKZTcan_08556_1s_mrna	unnamed protein product [Toxocara canis]	0	0	0.071711	0	0.14097	0	0.851368	0.999592	0.508697	-0.975122	down
Tcan_16004	gnlWGS:JPKZTcan_16004_1s_mrna	hypothetical protein Tcan_16004 [Toxocara canis]	0	0.60811	0.064003	1.32104	0	0	0.781722	0.999592	0.508776	-0.974898	down
Tcan_17650	gnlWGS:JPKZTcan_17650_1s_mrna	hypothetical protein Tcan_17650 [Toxocara canis]	1.9803	0	1.35822	2.43781	1.98824	2.12911	0.444691	0.999592	0.509298	-0.973419	down
Tcan_00138	gnlWGS:JPKZTcan_00138_1s_mrna	hypothetical protein Tcan_00138, partial [Toxocara canis]	0	0	0.418254	0.552436	0.049224	0.218587	0.733882	0.999592	0.509912	-0.971679	down
Tcan_05517	gnlWGS:JPKZTcan_05517_1s_mrna	unnamed protein product [Toxocara canis]	0.139814	0	0.371125	0.283003	0.309185	0.409772	0.599062	0.999592	0.50994	-0.971602	down
Tcan_14246	gnlWGS:JPKZTcan_14246_1s_mrna	hypothetical protein Tcan_14246 [Toxocara canis]	0.300167	0.34145	0.081647	0.644046	0.4367	0.337409	0.149133	0.999592	0.510003	-0.971421	down
Tcan_11428	gnlWGS:JPKZTcan_11428_1s_mrna	hypothetical protein Tcan_11428 [Toxocara canis]	0.085376	0.106999	0.213463	0.358042	0.198502	0.239157	0.491249	0.999592	0.510038	-0.971322	down
Tcan_04293	gnlWGS:JPKZTcan_04293_1s_mrna	50 kDa hatching enzyme [Toxocara canis]	0.743058	0.396341	0.28478	0.522304	1.81758	0.451188	0.23764	0.999592	0.510263	-0.970687	down
Tcan_00426	gnlWGS:JPKZTcan_00426_1s_mrna	hypothetical protein Tcan_00426, partial [Toxocara canis]	0	0.188789	0	0	0	0.369293	0.803198	0.999592	0.511217	-0.967991	down
Tcan_09217	gnlWGS:JPKZTcan_09217_1s_mrna	Spectrin alpha chain [Toxocara canis]	7.95622	16.8108	3.07241	33.7487	18.8504	1.8077	0.43709	0.999592	0.511691	-0.966656	down
Tcan_09244	gnlWGS:JPKZTcan_09244_1s_mrna	hypothetical protein Tcan_09244 [Toxocara canis]	2.68435	2.31373	0	4.27738	3.38433	2.1035	0.36453	0.999592	0.511824	-0.96628	down
Tcan_07803	gnlWGS:JPKZTcan_07803_1s_mrna	unnamed protein product [Toxocara canis]	0.434373	0.423514	0.399415	0.944294	0.836371	0.675623	0.0557028	0.999592	0.511871	-0.966149	down
Tcan_11756	gnlWGS:JPKZTcan_11756_1s_mrna	hypothetical protein Tcan_11756 [Toxocara canis]	0.343938	0.610016	0.409334	1.30224	0.545146	0.815231	0.257616	0.999592	0.512011	-0.965755	down
Tcan_00842	gnlWGS:JPKZTcan_00842_1s_mrna	hypothetical protein Tcan_00842, partial [Toxocara canis]	0.33363	0.539167	0.085296	0.89044	0.485771	0.49239	0.342448	0.999592	0.512733	-0.963721	down
Tcan_09101	gnlWGS:JPKZTcan_09101_1s_mrna	hypothetical protein Tcan_09101 [Toxocara canis]	0.877827	0.581906	0.5517	1.54639	2.09344	0.283008	0.247276	0.999592	0.51275	-0.963674	down
Tcan_01934	gnlWGS:JPKZTcan_01934_1s_mrna	Fatty acid-binding -like protein 5 [Toxocara canis]	0.781526	0	0	0	0.601205	0.922282	0.616371	0.999592	0.512985	-0.963011	down
Tcan_01025	gnlWGS:JPKZTcan_01025_1s_mrna	hypothetical protein Tcan_01025, partial [Toxocara canis]	0.004849	0.272539	0.245908	0.50161	0.492469	0.025018	0.712858	0.999592	0.51349	-0.961592	down
Tcan_04647	gnlWGS:JPKZTcan_04647_1s_mrna	Fatty acid-binding -like protein 2 [Toxocara canis]	0.511861	0.626638	0.565635	0.633745	2.02977	0.653922	0.207196	0.999592	0.51369	-0.961031	down
Tcan_13648	gnlWGS:JPKZTcan_13648_1s_mrna	hypothetical protein Tcan_13648 [Toxocara canis]	0.487311	0.304376	0.662164	0.639785	1.9553	0.231781	0.454786	0.999592	0.514298	-0.959323	down
Tcan_00920	gnlWGS:JPKZTcan_00920_1s_mrna	hypothetical protein Tcan_00920, partial [Toxocara canis]	0.118465	0	0.11606	0.116862	0	0.33811	0.596649	0.999592	0.515471	-0.956036	down
Tcan_17939	gnlWGS:JPKZTcan_17939_1s_mrna	hypothetical protein Tcan_17939 [Toxocara canis]	0.221395	0.386113	0.327776	0.373727	0.898358	0.54098	0.184808	0.999592	0.515858	-0.954954	down
Tcan_01591	gnlWGS:JPKZTcan_01591_1s_mrna	hypothetical protein Tcan_01591, partial [Toxocara canis]	3.12352	1.14398	0.397988	2.85846	5.17892	1.00172	0.24842	0.999592	0.516145	-0.954152	down
Tcan_06010	gnlWGS:JPKZTcan_06010_1s_mrna	Carboxypeptidase B [Toxocara canis]	0.287707	0.281849	0.127037	0.5573	0.233917	0.558245	0.172565	0.999592	0.516201	-0.953996	down
Tcan_10732	gnlWGS:JPKZTcan_10732_1s_mrna	putative mitochondrial pyruvate carrier 2 [Toxocara canis]	0.902011	1.4205	0.259905	1.61922	1.4362	1.94649	0.167871	0.999592	0.516286	-0.953759	down
Tcan_12341	gnlWGS:JPKZTcan_12341_1s_mrna	hypothetical protein Tcan_12341 [Toxocara canis]	0.187327	0.20214	0.328635	0.552778	0.35243	0.483519	0.172523	0.999592	0.517094	-0.951502	down
Tcan_01097	gnlWGS:JPKZTcan_01097_1s_mrna	hypothetical protein Tcan_01097, partial [Toxocara canis]	0.375206	0.394365	0.632851	0.518108	0.556327	1.63668	0.343799	0.999592	0.517286	-0.950965	down
Tcan_17677	gnlWGS:JPKZTcan_17677_1s_mrna	hypothetical protein Tcan_17677 [Toxocara canis]	0.230932	0.376523	0.187172	0.683859	0.30558	0.546191	0.25046	0.999592	0.51746	-0.950481	down
Tcan_13799	gnlWGS:JPKZTcan_13799_1s_mrna	RING finger protein B [Toxocara canis]	0	0.291263	0.480662	0.207818	0.775725	0.507531	0.574256	0.999592	0.517697	-0.949819	down
Tcan_18243	gnlWGS:JPKZTcan_18243_1s_mrna	hypothetical protein Tcan_18243 [Toxocara canis]	0.305884	0.373909	0.281203	0.746918	0.621138	0.486611	0.142056	0.999592	0.51815	-0.948558	down
Tcan_17249	gnlWGS:JPKZTcan_17249_1s_mrna	hypothetical protein Tcan_17249 [Toxocara canis]	0.099666	0.173125	0.333355	0.187012	0.491517	0.490074	0.340861	0.999592	0.518693	-0.947048	down
Tcan_12655	gnlWGS:JPKZTcan_12655_1s_mrna	hypothetical protein Tcan_12655 [Toxocara canis]	0.142066	0	0.680794	0.38986	0.809362	0.386751	0.632758	0.999592	0.518836	-0.946649	down
Tcan_09403	gnlWGS:JPKZTcan_09403_1s_mrna	hypothetical protein Tcan_09403 [Toxocara canis]	0.992004	0.740828	0	0.937298	2.2229	0.177973	0.513727	0.999592	0.519097	-0.945925	down
Tcan_04658	gnlWGS:JPKZTcan_04658_1s_mrna	hypothetical protein Tcan_04658 [Toxocara canis]	2.71059	1.13819	0.559927	3.86137	3.52653	1.08916	0.129942	0.999592	0.520075	-0.943209	down
Tcan_00234	gnlWGS:JPKZTcan_00234_1s_mrna	hypothetical protein Tcan_00234 [Toxocara canis]	0	0.125023	0	0.239738	0	0	0.874117	0.999592	0.521498	-0.939265	down
Tcan_04348	gnlWGS:JPKZTcan_04348_1s_mrna	Guanylate cyclase receptor-type gcy-1 [Toxocara canis]	0.515389	0.536628	0	0.894259	0.71216	0.409947	0.402139	0.999592	0.521739	-0.9386	down
Tcan_17842	gnlWGS:JPKZTcan_17842_1s_mrna	hypothetical protein Tcan_17842 [Toxocara canis]	0.023195	0.080391	0	0	0.198444	0	0.858231	0.999592	0.521991	-0.937903	down
Tcan_04480	gnlWGS:JPKZTcan_04480_1s_mrna	hypothetical protein Tcan_04480 [Toxocara canis]	0.279325	0	0.114562	0	0.613981	0.139646	0.69824	0.999592	0.522655	-0.936069	down
Tcan_09346	gnlWGS:JPKZTcan_09346_1s_mrna	hypothetical protein Tcan_09346 [Toxocara canis]	0.136315	0	0.180735	0.462823	0	0.143581	0.721744	0.999592	0.522836	-0.935569	down
Tcan_14198	gnlWGS:JPKZTcan_14198_1s_mrna	Paxillin [Toxocara canis]	1.82663	0.294773	0.535131	1.61511	2.64945	0.797812	0.262674	0.999592	0.52476	-0.930271	down
Tcan_02070	gnlWGS:JPKZTcan_02070_1s_mrna	Cecropin-P2 [Toxocara canis]	0	0.198179	0	0	0.377399	0	0.884473	0.999592	0.525118	-0.929287	down
Tcan_09821	gnlWGS:JPKZTcan_09821_1s_mrna	hypothetical protein Tcan_09821 [Toxocara canis]	0.863045	0.231739	0	1.05156	1.03326	0	0.62437	0.999592	0.525122	-0.929275	down
Tcan_16689	gnlWGS:JPKZTcan_16689_1s_mrna	Tyrosine-protein phosphatase non-receptor type 2 [Toxocara canis]	0.855207	0.550672	0.247406	0.888588	1.51444	0.743402	0.0601251	0.999592	0.525448	-0.92838	down
Tcan_04888	gnlWGS:JPKZTcan_04888_1s_mrna	hypothetical protein Tcan_04888 [Toxocara canis]	0.722753	1.87245	0.271162	2.15943	1.82932	1.46298	0.236757	0.999592	0.525772	-0.927492	down
Tcan_03823	gnlWGS:JPKZTcan_03823_1s_mrna	hypothetical protein Tcan_03823 [Toxocara canis]	1.36883	0.357881	0.292139	1.96243	1.40393	0.472068	0.225025	0.999592	0.525956	-0.926985	down
Tcan_12473	gnlWGS:JPKZTcan_12473_1s_mrna	hypothetical protein Tcan_12473 [Toxocara canis]	0.618364	0	0.560291	1.66321	0.573715	0	0.717583	0.999592	0.526909	-0.924374	down
Tcan_13844	gnlWGS:JPKZTcan_13844_1s_mrna	hypothetical protein Tcan_13844 [Toxocara canis]	0	0	0.075402	0.143061	0	0	0.932909	0.999592	0.527062	-0.923956	down
Tcan_13681	gnlWGS:JPKZTcan_13681_1s_mrna	hypothetical protein Tcan_13681 [Toxocara canis]	17.6224	21.4617	0	19.2995	28.3976	26.4533	0.59265	0.999592	0.527092	-0.923874	down
Tcan_12118	gnlWGS:JPKZTcan_12118_1s_mrna	hypothetical protein Tcan_12118 [Toxocara canis]	0.329613	0	0.148831	0.334513	0.148795	0.424121	0.429308	0.999592	0.527252	-0.923435	down
Tcan_01113	gnlWGS:JPKZTcan_01113_1s_mrna	hypothetical protein Tcan_01113, partial [Toxocara canis]	0.551578	0.11126	0.072723	0.603365	0.499516	0.290683	0.432768	0.999592	0.527827	-0.921862	down
Tcan_08297	gnlWGS:JPKZTcan_08297_1s_mrna	hypothetical protein Tcan_08297 [Toxocara canis]	0	0.072164	0	0.077314	0.059187	0	0.731815	0.999592	0.52867	-0.91956	down
Tcan_06514	gnlWGS:JPKZTcan_06514_1s_mrna	hypothetical protein Tcan_06514 [Toxocara canis]	0	7.14987	9.99283	9.74094	10.1026	12.5132	0.684758	0.999592	0.529804	-0.916469	down
Tcan_02417	gnlWGS:JPKZTcan_02417_1s_mrna	hypothetical protein Tcan_02417 [Toxocara canis]	5.09981	0	2.60595	4.33937	7.11322	3.07621	0.474415	0.999592	0.530378	-0.914907	down
Tcan_00799	gnlWGS:JPKZTcan_00799_1s_mrna	hypothetical protein Tcan_00799, partial [Toxocara canis]	0.793673	0.327314	0.145206	1.42523	0.699155	0.261087	0.399423	0.999592	0.530793	-0.913779	down
Tcan_05971	gnlWGS:JPKZTcan_05971_1s_mrna	hypothetical protein Tcan_05971 [Toxocara canis]	0.506469	0	0	0.73422	0	0.219302	0.660208	0.999592	0.531156	-0.912792	down
Tcan_12193	gnlWGS:JPKZTcan_12193_1s_mrna	hypothetical protein Tcan_12193, partial [Toxocara canis]	0.05531	0.046225	0.028718	0.072199	0.173	0	0.6548	0.999592	0.531213	-0.912636	down
Tcan_13895	gnlWGS:JPKZTcan_13895_1s_mrna	hypothetical protein Tcan_13895 [Toxocara canis]	1.3051	0.894198	0.535375	1.85031	2.42923	0.866828	0.229686	0.999592	0.531379	-0.912186	down
Tcan_00870	gnlWGS:JPKZTcan_00870_1s_mrna	hypothetical protein Tcan_00870, partial [Toxocara canis]	0.87583	0.30712	0.021799	0.678279	0.919918	0.667309	0.376414	0.999592	0.531779	-0.911101	down
Tcan_13226	gnlWGS:JPKZTcan_13226_1s_mrna	hypothetical protein Tcan_13226 [Toxocara canis]	0.394257	0.192618	0	0.379863	0.504715	0.21882	0.484798	0.999592	0.53188	-0.910828	down
Tcan_05239	gnlWGS:JPKZTcan_05239_1s_mrna	hypothetical protein Tcan_05239 [Toxocara canis]	6.40333	3.36083	1.23493	6.80288	9.74171	4.133	0.0834268	0.999592	0.531932	-0.910685	down
Tcan_14851	gnlWGS:JPKZTcan_14851_1s_mrna	hypothetical protein Tcan_14851 [Toxocara canis]	0	0	0.976334	1.25753	0.577622	0	0.854999	0.999592	0.532019	-0.910451	down
Tcan_16069	gnlWGS:JPKZTcan_16069_1s_mrna	MAP kinase kinase mkk-4, partial [Toxocara canis]	0.119206	0	0.096367	0.278784	0.126236	0	0.695006	0.999592	0.532253	-0.909817	down
Tcan_05063	gnlWGS:JPKZTcan_05063_1s_mrna	Ankyrin repeat, PH and SEC7 domain containing protein secG [Toxocara canis]	4.76452	2.99073	1.25147	5.12484	9.09055	2.69748	0.0889922	0.999592	0.532536	-0.909048	down
Tcan_18015	gnlWGS:JPKZTcan_18015_1s_mrna	Calmodulin-like protein [Toxocara canis]	1.03409	1.04796	0.305762	1.36711	1.12882	1.98541	0.130134	0.999592	0.532833	-0.908245	down
Tcan_01714	gnlWGS:JPKZTcan_01714_1s_mrna	hypothetical protein Tcan_01714 [Toxocara canis]	0.116765	0.380115	0	0.262634	0.669792	0	0.748483	0.999592	0.532889	-0.908092	down
Tcan_14872	gnlWGS:JPKZTcan_14872_1s_mrna	hypothetical protein Tcan_14872 [Toxocara canis]	0.072087	0.169746	0	0	0.168128	0.285376	0.613563	0.999592	0.533254	-0.907104	down
Tcan_18714	gnlWGS:JPKZTcan_18714_1s_mrna	hypothetical protein Tcan_18714 [Toxocara canis]	1.0773	0.526152	0	0.690326	1.61638	0.69987	0.4164	0.999592	0.533315	-0.906941	down
Tcan_02882	gnlWGS:JPKZTcan_02882_1s_mrna	hypothetical protein Tcan_02882 [Toxocara canis]	0.876103	1.13365	0.739707	2.2429	2.47697	0.434953	0.210743	0.999592	0.533376	-0.906775	down
Tcan_12769	gnlWGS:JPKZTcan_12769_1s_mrna	hypothetical protein Tcan_12769 [Toxocara canis]	0.86498	1.19742	1.07548	1.57214	2.48738	1.82351	0.204481	0.999592	0.533376	-0.906774	down
Tcan_18830	gnlWGS:JPKZTcan_18830_1s_mrna	hypothetical protein Tcan_18830 [Toxocara canis]	0.370052	0.368307	0	1.03184	0	0.352053	0.631022	0.999592	0.533536	-0.906343	down
Tcan_01979	gnlWGS:JPKZTcan_01979_1s_mrna	hypothetical protein Tcan_01979 [Toxocara canis]	0.431012	0	0.192127	0	0	1.16769	0.693296	0.999592	0.533651	-0.906033	down
Tcan_06950	gnlWGS:JPKZTcan_06950_1s_mrna	hypothetical protein Tcan_06950 [Toxocara canis]	0.498622	0.477688	0.332744	1.13568	0.899968	0.41698	0.0732	0.999592	0.533735	-0.905804	down
Tcan_10036	gnlWGS:JPKZTcan_10036_1s_mrna	hypothetical protein Tcan_10036 [Toxocara canis]	0.068734	0.047154	0	0.135757	0	0.081367	0.597327	0.999592	0.533741	-0.905788	down
Tcan_07324	gnlWGS:JPKZTcan_07324_1s_mrna	hypothetical protein Tcan_07324 [Toxocara canis]	4.14474	1.13634	0.549247	4.46294	4.87263	1.57984	0.214643	0.999592	0.534137	-0.904719	down
Tcan_09179	gnlWGS:JPKZTcan_09179_1s_mrna	Uncharacterized protein R05D3.5 [Toxocara canis]	0.580193	0.727763	0.410753	1.28047	1.56592	0.369961	0.235113	0.999592	0.534367	-0.904097	down
Tcan_10097	gnlWGS:JPKZTcan_10097_1s_mrna	hypothetical protein Tcan_10097 [Toxocara canis]	0.045482	0.097434	0	0.047684	0.219647	0	0.703583	0.999592	0.534603	-0.90346	down
Tcan_02107	gnlWGS:JPKZTcan_02107_1s_mrna	hypothetical protein Tcan_02107 [Toxocara canis]	2.15716	2.63556	1.45932	3.07106	3.39202	5.2271	0.0951951	0.999592	0.534812	-0.902897	down
Tcan_12364	gnlWGS:JPKZTcan_12364_1s_mrna	Ephrin-4 [Toxocara canis]	2.03713	1.051	0.555658	2.59227	3.46353	0.757384	0.167063	0.999592	0.534813	-0.902894	down
Tcan_16738	gnlWGS:JPKZTcan_16738_1s_mrna	hypothetical protein Tcan_16738 [Toxocara canis]	0.551771	0.409606	0.160026	1.01182	0.807536	0.276866	0.220312	0.999592	0.534964	-0.902487	down
Tcan_00266	gnlWGS:JPKZTcan_00266_1s_mrna	hypothetical protein Tcan_00266 [Toxocara canis]	0.271668	0.322408	0.166384	0.489004	0.18374	0.748762	0.328558	0.999592	0.534968	-0.902476	down
Tcan_14193	gnlWGS:JPKZTcan_14193_1s_mrna	Tyrosine-protein phosphatase non-receptor type 9 [Toxocara canis]	0	0.13239	0.113904	0.259021	0.201202	0	0.757743	0.999592	0.535162	-0.901952	down
Tcan_18620	gnlWGS:JPKZTcan_18620_1s_mrna	hypothetical protein Tcan_18620 [Toxocara canis]	0.105139	0.25596	0.314447	0.241165	0.680125	0.340677	0.384856	0.999592	0.535312	-0.901548	down
Tcan_17427	gnlWGS:JPKZTcan_17427_1s_mrna	hypothetical protein Tcan_17427 [Toxocara canis]	4.70587	2.37366	1.26294	6.19315	6.73086	2.64943	0.0658228	0.999592	0.535686	-0.900541	down
Tcan_12563	gnlWGS:JPKZTcan_12563_1s_mrna	Beta-1,3-galactosyl-O-glycosyl-glycoprotein beta-1,6-N-acetylglucosaminyltransferase [Toxocara canis]	0	0.252433	0.067671	0.135643	0.160602	0.300062	0.520895	0.999592	0.536811	-0.897515	down
Tcan_00991	gnlWGS:JPKZTcan_00991_1s_mrna	hypothetical protein Tcan_00991, partial [Toxocara canis]	0.35453	0.365124	0.469874	0.658962	0.845052	0.711801	0.164011	0.999592	0.536835	-0.897448	down
Tcan_12348	gnlWGS:JPKZTcan_12348_1s_mrna	hypothetical protein Tcan_12348 [Toxocara canis]	0	0.080587	0	0.02523	0.124827	0	0.785912	0.999592	0.537043	-0.896892	down
Tcan_12851	gnlWGS:JPKZTcan_12851_1s_mrna	hypothetical protein Tcan_12851 [Toxocara canis]	0.65576	0.250812	0.396409	0.305222	1.26391	0.854244	0.277711	0.999592	0.537673	-0.895199	down
Tcan_18691	gnlWGS:JPKZTcan_18691_1s_mrna	Acetyl-coenzyme A synthetase [Toxocara canis]	0.049634	0.061445	0.037598	0.157767	0.118683	0	0.636069	0.999592	0.537808	-0.894837	down
Tcan_16782	gnlWGS:JPKZTcan_16782_1s_mrna	hypothetical protein Tcan_16782 [Toxocara canis]	1.48861	0.877978	0.815761	1.63249	2.93743	1.34661	0.0668961	0.999592	0.537875	-0.894658	down
Tcan_09125	gnlWGS:JPKZTcan_09125_1s_mrna	Tyrosine-protein phosphatase non-receptor type 9 [Toxocara canis]	1.10977	0.582447	0.29457	1.4609	1.97129	0.260715	0.247231	0.999592	0.538002	-0.894318	down
Tcan_12645	gnlWGS:JPKZTcan_12645_1s_mrna	Spindle- and centromere-associated protein [Toxocara canis]	0.155892	0.063876	0	0.21527	0.114717	0.078262	0.433967	0.999592	0.538319	-0.893468	down
Tcan_00761	gnlWGS:JPKZTcan_00761_1s_mrna	hypothetical protein Tcan_00761, partial [Toxocara canis]	0.708815	0.784495	0.470561	0.600796	1.90756	1.13386	0.270494	0.999592	0.539197	-0.891116	down
Tcan_12190	gnlWGS:JPKZTcan_12190_1s_mrna	hypothetical protein Tcan_12190 [Toxocara canis]	0.464224	0.808746	0.41873	1.20859	1.21636	0.710663	0.101849	0.999592	0.539512	-0.890273	down
Tcan_00751	gnlWGS:JPKZTcan_00751_1s_mrna	hypothetical protein Tcan_00751, partial [Toxocara canis]	1.00461	0.295368	0.014691	0.384571	0.710005	1.34119	0.365478	0.999592	0.539736	-0.889673	down
Tcan_00680	gnlWGS:JPKZTcan_00680_1s_mrna	hypothetical protein Tcan_00680, partial [Toxocara canis]	0.676317	0.29932	0.255749	0.528927	1.45869	0.292023	0.389778	0.999592	0.540167	-0.888522	down
Tcan_01160	gnlWGS:JPKZTcan_01160_1s_mrna	hypothetical protein Tcan_01160, partial [Toxocara canis]	0.243462	0	0.083918	0.458609	0.042466	0.10424	0.589396	0.999592	0.540842	-0.88672	down
Tcan_02111	gnlWGS:JPKZTcan_02111_1s_mrna	unnamed protein product [Toxocara canis]	2.44392	1.59911	1.41299	4.66281	3.96857	1.44386	0.138993	0.999592	0.541526	-0.884896	down
Tcan_04077	gnlWGS:JPKZTcan_04077_1s_mrna	hypothetical protein Tcan_04077 [Toxocara canis]	0.277127	0	0.028542	0.216409	0.285181	0.062836	0.54613	0.999592	0.541557	-0.884814	down
Tcan_13016	gnlWGS:JPKZTcan_13016_1s_mrna	hypothetical protein Tcan_13016 [Toxocara canis]	2.6748	3.0318	1.31299	6.13013	4.56695	2.25209	0.0924276	0.999592	0.542088	-0.883401	down
Tcan_01302	gnlWGS:JPKZTcan_01302_1s_mrna	hypothetical protein Tcan_01302, partial [Toxocara canis]	0	0.191015	0	0.314745	0	0.0376	0.748214	0.999592	0.542125	-0.883303	down
Tcan_03656	gnlWGS:JPKZTcan_03656_1s_mrna	Sphingolipid delta(4)-desaturase DES1 [Toxocara canis]	0.277256	0.33961	0	0.327944	0.324919	0.483678	0.393438	0.999592	0.542757	-0.881621	down
Tcan_11444	gnlWGS:JPKZTcan_11444_1s_mrna	hypothetical protein Tcan_11444 [Toxocara canis]	0.176735	0	0	0	0	0.325548	0.732884	0.999592	0.542885	-0.881283	down
Tcan_09791	gnlWGS:JPKZTcan_09791_1s_mrna	hypothetical protein Tcan_09791 [Toxocara canis]	0.055629	0	0	0	0.102319	0	0.815698	0.999592	0.543682	-0.879165	down
Tcan_11401	gnlWGS:JPKZTcan_11401_1s_mrna	hypothetical protein Tcan_11401 [Toxocara canis]	0.772035	1.16375	0.943025	1.92795	2.08706	1.27724	0.156839	0.999592	0.543967	-0.878408	down
Tcan_02570	gnlWGS:JPKZTcan_02570_1s_mrna	hypothetical protein Tcan_02570, partial [Toxocara canis]	0	0.149382	0.23761	0.144128	0.360616	0.206525	0.589454	0.999592	0.544087	-0.878092	down
Tcan_03601	gnlWGS:JPKZTcan_03601_1s_mrna	Protein kinase C-binding protein NELL2 [Toxocara canis]	0.924451	0.71438	0	0.799598	1.14204	1.06923	0.393514	0.999592	0.544305	-0.877512	down
[truncated: 33,069 more rows]
