# Supplementary material for: Spatial transcriptomic atlas of murine neurotoxocariasis reveals region-specific host responses and dysfunction in the brain
Source: Research Square preprint supplement (doi:10.21203/rs.3.rs-6743037/v1), 2025-06-09
Supplement: Supplementary file 2 [file 751d246f0d88f93673a0b900.xlsx]

## Sheet: Table S1
Table S1. Differential analysis of transcription between regions containing visible migrating Toxocara canis larvae and contralateral regions without visible larvae in mouse brain slice 4 (S4) – using Stereo-seq data.
Gene symbol	niche 1	CPM	niche 2	CPM	control 1	CPM	control 2	CPM	niche_mean	control_mean	log2(fold change)	P value	False discovery rate
Spp1	9	14.96	12	20.19	1431	2505.67	1343	2181.1	17.575	2343.39	7.05893	0	0
Cyr61	1	1.66	1	1.68	66	115.57	17	27.61	1.67	71.59	5.42184	1.05e-22	1.5e-20
H2-Aa	17	28.27	1	1.68	221	386.97	190	308.57	14.975	347.77	4.53751	7.42e-98	4.36e-95
Atf3	4	6.65	1	1.68	39	68.29	65	105.56	4.165	86.925	4.38338	4.26e-25	6.88e-23
H2-Ab1	27	44.89	1	1.68	342	598.84	212	344.3	23.285	471.57	4.34	1.37e-128	1.06e-125
Spi1	2	3.33	1	1.68	18	31.52	38	61.71	2.505	46.615	4.21791	1.23e-13	9.77e-12
Lyz2	97	161.28	29	48.8	744	1302.74	1459	2369.5	105.04	1836.12	4.12765	0	0
Cd84	6	9.98	2	3.37	52	91.05	73	118.56	6.675	104.805	3.9728	4.55e-28	8.58e-26
H2-Eb1	16	26.6	2	3.37	131	229.38	139	225.74	14.985	227.56	3.92466	8.55e-59	3.56e-56
Itgb2	1	1.66	4	6.73	38	66.54	37	60.09	4.195	63.315	3.9158	4.52e-17	4.96e-15
Fn1	12	19.95	7	11.78	190	332.69	73	118.56	15.865	225.625	3.83001	1.44e-56	5.33e-54
Lgals3	27	44.89	20	33.66	313	548.06	300	487.22	39.275	517.64	3.72027	2.36e-126	1.69e-123
Cd14	1	1.66	2	3.37	17	29.77	21	34.11	2.515	31.94	3.66673	1.06e-08	4.75e-07
Srgn	10	16.63	13	21.88	233	407.98	45	73.08	19.255	240.53	3.64291	1.74e-57	6.96e-55
Cd74	68	113.06	8	13.46	416	728.41	423	686.97	63.26	707.69	3.48375	1.27e-161	1.81e-158
Igf1	8	13.3	8	13.46	80	140.08	70	113.68	13.38	126.88	3.24531	1.25e-28	2.44e-26
Adamts1	6	9.98	5	8.41	41	71.79	51	82.83	9.195	77.31	3.07173	4.83e-17	5.25e-15
Rel	1	1.66	1	1.68	1	1.75	16	25.98	1.67	13.865	3.05353	0.00073055	0.0083017
Adgrg6	1	1.66	1	1.68	10	17.51	6	9.74	1.67	13.625	3.02834	0.00131529	0.0131661
Col12a1	1	1.66	1	1.68	10	17.51	6	9.74	1.67	13.625	3.02834	0.00131529	0.0131661
S1pr3	18	29.93	5	8.41	103	180.35	81	131.55	19.17	155.95	3.02416	1.74e-32	3.69e-30
Abcc9	1	1.66	1	1.68	5	8.75	11	17.86	1.67	13.305	2.99405	0.00131529	0.0131661
Fcgr2b	17	28.27	19	31.97	159	278.41	117	190.01	30.12	234.21	2.95901	3.67e-47	1.15e-44
Plek	8	13.3	10	16.83	66	115.57	72	116.93	15.065	116.25	2.94796	5.06e-24	7.56e-22
Adgre1	6	9.98	2	3.37	30	52.53	26	42.23	6.675	47.38	2.82744	5.72e-10	3.21e-08
Rbms2	3	4.99	1	1.68	12	21.01	16	25.98	3.335	23.495	2.8166	1.94e-05	0.000419792
Ms4a6d	5	8.31	7	11.78	42	73.54	41	66.59	10.045	70.065	2.80222	3.42e-14	2.8e-12
Igfbpl1	4	6.65	4	6.73	44	77.04	9	14.62	6.69	45.83	2.77621	1.75e-09	8.86e-08
Hspb1	2	3.33	13	21.88	40	70.04	61	99.07	12.605	84.555	2.74589	8.5e-17	8.85e-15
Cd300c2	5	8.31	3	5.05	13	22.76	40	64.96	6.68	43.86	2.71499	3.06e-09	1.49e-07
Ddb2	1	1.66	1	1.68	6	10.51	7	11.37	1.67	10.94	2.71169	0.00739567	0.04753
Fcgr3	24	39.9	11	18.51	115	201.36	110	178.65	29.205	190.005	2.70175	3.4e-35	8.1e-33
Ppp1r18	4	6.65	4	6.73	33	57.78	18	29.23	6.69	43.505	2.7011	9.26e-09	4.19e-07
Cd68	15	24.94	13	21.88	61	106.81	118	191.64	23.41	149.225	2.67229	5.2e-28	9.62e-26
Fcer1g	28	46.55	11	18.51	96	168.1	150	243.61	32.53	205.855	2.66179	1.14e-37	2.93e-35
Gm27021	1	1.66	1	1.68	11	19.26	1	1.62	1.67	10.44	2.6442	0.0129545	0.0708281
Hfe	1	1.66	3	5.05	7	12.26	18	29.23	3.355	20.745	2.62838	0.00010427	0.00170098
Nrros	4	6.65	2	3.37	27	47.28	9	14.62	5.01	30.95	2.62706	2.86e-06	7.97e-05
Gm10785	1	1.66	1	1.68	7	12.26	5	8.12	1.67	10.19	2.60923	0.0129545	0.0708281
Cd52	32	53.21	3	5.05	101	176.85	108	175.4	29.13	176.125	2.59602	1.95e-31	3.98e-29
Dclre1c	1	1.66	1	1.68	5	8.75	7	11.37	1.67	10.06	2.59071	0.0129545	0.0708281
Cd83	1	1.66	12	20.19	47	82.3	30	48.72	10.925	65.51	2.58408	1.95e-12	1.44e-10
C1qc	115	191.21	64	107.7	503	880.75	560	909.47	149.455	895.11	2.58235	1.1e-150	1.1e-147
Btk	1	1.66	1	1.68	4	7	8	12.99	1.67	9.995	2.58136	0.0129545	0.0708281
Cdh7	1	1.66	1	1.68	3	5.25	9	14.62	1.67	9.935	2.57267	0.0129545	0.0708281
Alg3	3	4.99	1	1.68	17	29.77	6	9.74	3.335	19.755	2.56646	0.000312104	0.00420626
Cyba	22	36.58	16	26.93	108	189.11	113	183.52	31.755	186.315	2.55269	1.29e-32	2.81e-30
Gm20642	2	3.33	1	1.68	12	21.01	5	8.12	2.505	14.565	2.53962	0.00258284	0.0220003
Mrgbp	1	1.66	4	6.73	9	15.76	20	32.48	4.195	24.12	2.52349	3.88e-05	0.000755427
Kti12	3	4.99	2	3.37	20	35.02	8	12.99	4.18	24.005	2.52176	6.66e-05	0.00119167
Fxyd5	14	23.28	9	15.15	65	113.81	65	105.56	19.215	109.685	2.51306	2.93e-19	3.45e-17
Cyth4	7	11.64	6	10.1	29	50.78	44	71.46	10.87	61.12	2.49129	2.84e-11	1.82e-09
Anxa2	38	63.18	21	35.34	230	402.73	92	149.41	49.26	276.07	2.48655	8.96e-46	2.56e-43
Slc25a47	1	1.66	1	1.68	5	8.75	6	9.74	1.67	9.245	2.46883	0.0224819	0.103878
Mmp2	1	1.66	1	1.68	3	5.25	8	12.99	1.67	9.12	2.44919	0.0224819	0.103878
Gla	2	3.33	3	5.05	15	26.26	12	19.49	4.19	22.875	2.44875	0.00011374	0.00181115
Stab1	11	18.29	1	1.68	50	87.55	13	21.11	9.985	54.33	2.44391	1.04e-09	5.51e-08
Emp3	8	13.3	4	6.73	26	45.53	39	63.34	10.015	54.435	2.44237	6.13e-10	3.42e-08
Apobec1	8	13.3	5	8.41	30	52.53	40	64.96	10.855	58.745	2.43611	1.39e-10	8.26e-09
Bace2	3	4.99	1	1.68	13	22.76	8	12.99	3.335	17.875	2.42218	0.000913691	0.00989914
Dhrs3	20	33.25	10	16.83	77	134.83	82	133.17	25.04	134	2.41993	2.51e-22	3.53e-20
Odc1	2	3.33	2	3.37	11	19.26	10	16.24	3.35	17.75	2.40559	0.000913691	0.00989914
Cox7a1	8	13.3	4	6.73	27	47.28	36	58.47	10.015	52.875	2.40042	1.75e-09	8.86e-08
Lair1	7	11.64	2	3.37	21	36.77	26	42.23	7.505	39.5	2.39593	2.62e-07	9.52e-06
Ctsz	66	109.74	55	92.56	360	630.36	267	433.62	101.15	531.99	2.3949	3.92e-83	2.18e-80
Ostf1	7	11.64	13	21.88	44	77.04	61	99.07	16.76	88.055	2.39338	4.52e-15	3.93e-13
Cd53	11	18.29	13	21.88	62	108.56	63	102.32	20.085	105.44	2.39223	1.28e-17	1.44e-15
Apoc1	32	53.21	20	33.66	102	178.6	168	272.84	43.435	225.72	2.3776	2.12e-36	5.3e-34
P3h2	2	3.33	3	5.05	19	33.27	6	9.74	4.19	21.505	2.35965	0.000326493	0.0043359
Smagp	1	1.66	1	1.68	7	12.26	3	4.87	1.67	8.565	2.35861	0.0386024	0.14844
Gm11973	3	4.99	1	1.68	11	19.26	9	14.62	3.335	16.94	2.34468	0.00154863	0.0148764
9930104L06Rik	4	6.65	5	8.41	26	45.53	19	30.86	7.53	38.195	2.34266	7.41e-07	2.42e-05
Kdelc2	2	3.33	1	1.68	8	14.01	7	11.37	2.505	12.69	2.34081	0.00755069	0.0482472
C1qb	79	131.35	47	79.1	271	474.52	357	579.79	105.225	527.155	2.32475	2.73e-80	1.44e-77
Map3k14	3	4.99	1	1.68	7	12.26	13	21.11	3.335	16.685	2.32279	0.00154863	0.0148764
Malt1	1	1.66	2	3.37	6	10.51	9	14.62	2.515	12.565	2.32078	0.00755069	0.0482472
Abhd1	4	6.65	2	3.37	16	28.02	13	21.11	5.01	24.565	2.29372	0.000117597	0.00186871
P2ry14	1	1.66	1	1.68	1	1.75	9	14.62	1.67	8.185	2.29313	0.0386024	0.14844
Srrm4	3	4.99	1	1.68	14	24.51	5	8.12	3.335	16.315	2.29044	0.0026065	0.0220703
Pycard	2	3.33	6	10.1	16	28.02	23	37.35	6.715	32.685	2.28317	5.61e-06	0.000145971
Adamts5	1	1.66	3	5.05	14	24.51	5	8.12	3.355	16.315	2.28181	0.0026065	0.0220703
Cd109	2	3.33	3	5.05	13	22.76	11	17.86	4.19	20.31	2.27717	0.000548505	0.00661198
Pxdc1	8	13.3	4	6.73	33	57.78	24	38.98	10.015	48.38	2.27225	3.84e-08	1.62e-06
Icam1	4	6.65	1	1.68	8	14.01	16	25.98	4.165	19.995	2.26325	0.000548505	0.00661198
Mlh1	1	1.66	2	3.37	11	19.26	3	4.87	2.515	12.065	2.2622	0.012744	0.0702148
Rad9a	3	4.99	1	1.68	8	14.01	11	17.86	3.335	15.935	2.25644	0.0026065	0.0220703
Shc3	3	4.99	1	1.68	8	14.01	11	17.86	3.335	15.935	2.25644	0.0026065	0.0220703
Mpeg1	32	53.21	22	37.02	109	190.86	146	237.11	45.115	213.985	2.24583	3.61e-32	7.53e-30
Ctsd	597	992.61	319	536.84	1942	3400.43	2272	3689.85	764.725	3545.14	2.21283	0	0
Slc7a2	21	34.92	22	37.02	165	288.91	27	43.85	35.97	166.38	2.20962	3.49e-24	5.29e-22
Gm17354	1	1.66	2	3.37	4	7	10	16.24	2.515	11.62	2.20798	0.012744	0.0702148
2610020C07Rik	1	1.66	2	3.37	3	5.25	11	17.86	2.515	11.555	2.19989	0.012744	0.0702148
Gm26883	2	3.33	1	1.68	2	3.5	12	19.49	2.505	11.495	2.19812	0.012744	0.0702148
C3	14	23.28	11	18.51	79	138.33	32	51.97	20.895	95.15	2.18705	2.64e-14	2.22e-12
Mafb	23	38.24	14	23.56	99	173.35	66	107.19	30.9	140.27	2.18253	1.29e-20	1.67e-18
Cdc25b	2	3.33	1	1.68	12	21.01	1	1.62	2.505	11.315	2.17535	0.0212958	0.0996992
Pex12	1	1.66	2	3.37	9	15.76	4	6.5	2.515	11.13	2.14582	0.0212958	0.0996992
Slc40a1	2	3.33	1	1.68	7	12.26	6	9.74	2.505	11	2.13462	0.0212958	0.0996992
B4galt1	4	6.65	4	6.73	27	47.28	7	11.37	6.69	29.325	2.13205	6.93e-05	0.00123386
C1qa	181	300.94	128	215.41	694	1215.19	645	1047.51	258.175	1131.35	2.13162	6.31e-149	5.74e-146
Ptprc	1	1.66	8	13.46	21	36.77	18	29.23	7.56	33	2.12601	1.54e-05	0.000344318
Ccdc88b	2	3.33	1	1.68	4	7	9	14.62	2.505	10.81	2.10948	0.0212958	0.0996992
Psmb8	2	3.33	9	15.15	14	24.51	34	55.22	9.24	39.865	2.10916	1.26e-06	3.76e-05
Prcp	1	1.66	2	3.37	4	7	9	14.62	2.515	10.81	2.10374	0.0212958	0.0996992
B830012L14Rik	3	4.99	1	1.68	8	14.01	9	14.62	3.335	14.315	2.10177	0.00721194	0.0468308
Egln3	3	4.99	1	1.68	8	14.01	9	14.62	3.335	14.315	2.10177	0.00721194	0.0468308
Lgals1	57	94.77	41	69	186	325.68	230	373.53	81.885	349.605	2.09405	1.02e-47	3.39e-45
Ppox	3	4.99	1	1.68	6	10.51	11	17.86	3.335	14.185	2.08861	0.00721194	0.0468308
Ifi202b	4	6.65	4	6.73	20	35.02	13	21.11	6.69	28.065	2.06869	0.000113084	0.00180646
Angptl4	2	3.33	6	10.1	20	35.02	13	21.11	6.715	28.065	2.06331	0.000113084	0.00180646
Rita1	5	8.31	4	6.73	12	21.01	25	40.6	7.52	30.805	2.03436	4.1e-05	0.000784537
Cpne8	2	3.33	4	6.73	15	26.26	9	14.62	5.03	20.44	2.02276	0.00143655	0.0141393
S100a4	75	124.7	6	10.1	242	423.74	76	123.43	67.4	273.585	2.02117	3.49e-35	8.13e-33
Setmar	3	4.99	2	3.37	11	19.26	9	14.62	4.18	16.94	2.01886	0.00408841	0.0306013
Ctss	189	314.24	163	274.31	589	1031.33	828	1344.72	294.275	1188.03	2.01333	3.6e-146	3e-143
Ncf2	3	4.99	5	8.41	13	22.76	19	30.86	6.7	26.81	2.00054	0.000183456	0.00269392
Rab3il1	8	13.3	1	1.68	24	42.02	11	17.86	7.49	29.94	1.99904	0.000106929	0.00173333
Gusb	19	31.59	11	18.51	46	80.55	73	118.56	25.05	99.555	1.99068	1.06e-13	8.46e-12
Fam206a	4	6.65	3	5.05	20	35.02	7	11.37	5.85	23.195	1.98731	0.000825418	0.00920198
Sbno2	12	19.95	9	15.15	47	82.3	35	56.84	17.55	69.57	1.98699	1.12e-09	5.93e-08
Efna2	1	1.66	2	3.37	3	5.25	9	14.62	2.515	9.935	1.98196	0.0351896	0.139863
Spty2d1	6	9.98	3	5.05	18	31.52	17	27.61	7.515	29.565	1.97605	0.000106929	0.00173333
AU020206	27	44.89	10	16.83	47	82.3	98	159.16	30.86	120.73	1.96797	3.01e-16	2.95e-14
Slc15a3	8	13.3	5	8.41	28	49.03	22	35.73	10.855	42.38	1.96502	3.07e-06	8.43e-05
Dusp12	7	11.64	1	1.68	8	14.01	23	37.35	6.66	25.68	1.94705	0.000295989	0.00402159
Fam20c	26	43.23	13	21.88	75	131.32	73	118.56	32.555	124.94	1.94028	2.77e-16	2.77e-14
Oaf	7	11.64	13	21.88	52	91.05	23	37.35	16.76	64.2	1.93755	7.61e-09	3.52e-07
Nedd9	7	11.64	1	1.68	16	28.02	14	22.74	6.66	25.38	1.9301	0.000474795	0.00591276
Gch1	1	1.66	5	8.41	7	12.26	16	25.98	5.035	19.12	1.92502	0.00232385	0.0204047
A830082N09Rik	2	3.33	3	5.05	7	12.26	12	19.49	4.19	15.875	1.92173	0.00662641	0.0439652
Lgi2	17	28.27	31	52.17	33	57.78	152	246.86	40.22	152.32	1.92112	7.37e-20	9.22e-18
Abracl	6	9.98	2	3.37	12	21.01	18	29.23	6.675	25.12	1.912	0.000474795	0.00591276
Hcls1	5	8.31	2	3.37	13	22.76	13	21.11	5.84	21.935	1.90919	0.00132455	0.0132136
Lrrc3	2	3.33	2	3.37	6	10.51	9	14.62	3.35	12.565	1.90718	0.0192385	0.0931723
Clic1	11	18.29	12	20.19	35	61.28	50	81.2	19.24	71.24	1.88858	1.59e-09	8.17e-08
Pvalb	66	109.74	136	228.87	45	78.79	723	1174.19	169.305	626.49	1.88767	5.29e-75	2.52e-72
Ctsh	20	33.25	17	28.61	56	98.06	79	128.3	30.93	113.18	1.87154	2.97e-14	2.47e-12
Pkib	1	1.66	5	8.41	8	14.01	14	22.74	5.035	18.375	1.86768	0.00373076	0.0286981
Ltc4s	1	1.66	9	15.15	16	28.02	20	32.48	8.405	30.25	1.84762	0.000157725	0.00236469
Grn	88	146.31	81	136.31	321	562.07	279	453.11	141.31	507.59	1.8448	2.71e-57	1.04e-54
Lpar6	2	3.33	4	6.73	15	26.26	6	9.74	5.03	18	1.83937	0.00594083	0.0404701
Heatr1	3	4.99	4	6.73	10	17.51	15	24.36	5.86	20.935	1.83694	0.00211074	0.0188627
Ctla2a	15	24.94	10	16.83	47	82.3	41	66.59	20.885	74.445	1.83371	2.17e-09	1.07e-07
Pdpn	9	14.96	16	26.93	54	94.55	33	53.59	20.945	74.07	1.82228	2.17e-09	1.07e-07
Colec12	9	14.96	5	8.41	24	42.02	25	40.6	11.685	41.31	1.82183	1.13e-05	0.000263852
Nrtn	6	9.98	5	8.41	12	21.01	27	43.85	9.195	32.43	1.81841	9.11e-05	0.00153095
Lzts3	4	6.65	3	5.05	16	28.02	8	12.99	5.85	20.505	1.80947	0.00333866	0.0266029
Plin2	10	16.63	8	13.46	35	61.28	27	43.85	15.045	52.565	1.80482	8.34e-07	2.66e-05
Gm42547	2	3.33	2	3.37	5	8.75	9	14.62	3.35	11.685	1.80242	0.0309206	0.128268
Apln	5	8.31	12	20.19	41	71.79	17	27.61	14.25	49.7	1.80228	1.43e-06	4.2e-05
Hpgds	8	13.3	1	1.68	13	22.76	18	29.23	7.49	25.995	1.7952	0.000683604	0.00790293
Slc41a3	3	4.99	2	3.37	11	19.26	6	9.74	4.18	14.5	1.79448	0.0169299	0.0849664
Rpl29	1	1.66	10	16.83	17	29.77	21	34.11	9.245	31.94	1.78862	0.000143253	0.00218374
Nes	3	4.99	8	13.46	27	47.28	10	16.24	9.225	31.76	1.78359	0.000224107	0.00318951
Chml	4	6.65	1	1.68	8	14.01	9	14.62	4.165	14.315	1.78114	0.0169299	0.0849664
Hps1	6	9.98	2	3.37	16	28.02	11	17.86	6.675	22.94	1.78103	0.00188656	0.0172762
Osmr	14	23.28	2	3.37	30	52.53	24	38.98	13.325	45.755	1.77979	5.96e-06	0.000152812
Plpp2	3	4.99	7	11.78	18	31.52	16	25.98	8.385	28.75	1.77768	0.000390895	0.00504381
Rhoj	10	16.63	19	31.97	58	101.56	40	64.96	24.3	83.26	1.77667	4.08e-10	2.33e-08
Fermt3	5	8.31	6	10.1	23	40.27	14	22.74	9.205	31.505	1.77509	0.000224107	0.00318951
Nckap1l	10	16.63	5	8.41	21	36.77	30	48.72	12.52	42.745	1.77152	1.03e-05	0.000242541
Nagpa	4	6.65	4	6.73	14	24.51	13	21.11	6.69	22.81	1.76959	0.00188656	0.0172762
Hmox1	1	1.66	9	15.15	15	26.26	19	30.86	8.405	28.56	1.76468	0.000390895	0.00504381
Hyi	2	3.33	11	18.51	21	36.77	23	37.35	10.92	37.06	1.76289	4.77e-05	0.000890982
Ptgs1	10	16.63	9	15.15	43	75.29	20	32.48	15.89	53.885	1.76176	7.58e-07	2.46e-05
Ly86	24	39.9	14	23.56	64	112.06	63	102.32	31.73	107.19	1.75625	2.3e-12	1.68e-10
Ccr5	6	9.98	3	5.05	14	24.51	16	25.98	7.515	25.245	1.74815	0.00107081	0.0112836
Rif1	9	14.96	13	21.88	38	66.54	35	56.84	18.42	61.69	1.74376	1.51e-07	5.86e-06
Fmnl3	6	9.98	1	1.68	12	21.01	11	17.86	5.83	19.435	1.73709	0.00523925	0.0366637
Plxna3	1	1.66	3	5.05	9	15.76	4	6.5	3.355	11.13	1.73007	0.049089	0.174756
Batf3	2	3.33	6	10.1	16	28.02	10	16.24	6.715	22.13	1.72054	0.00294675	0.0242931
Flvcr1	3	4.99	7	11.78	12	21.01	21	34.11	8.385	27.56	1.71669	0.000610072	0.00725412
Ccdc163	3	4.99	4	6.73	9	15.76	14	22.74	5.86	19.25	1.71589	0.00523925	0.0366637
Rassf5	2	3.33	8	13.46	10	17.51	23	37.35	8.395	27.43	1.70815	0.000610072	0.00725412
Phf13	1	1.66	4	6.73	11	19.26	5	8.12	4.195	13.69	1.70638	0.0266425	0.11614
Ankrd55	1	1.66	13	21.88	27	47.28	18	29.23	11.77	38.255	1.70053	6.61e-05	0.00118655
Renbp	3	4.99	5	8.41	10	17.51	16	25.98	6.7	21.745	1.69845	0.00294675	0.0242931
Pbx4	4	6.65	1	1.68	8	14.01	8	12.99	4.165	13.5	1.69657	0.0266425	0.11614
Lipt2	3	4.99	2	3.37	8	14.01	8	12.99	4.18	13.5	1.69138	0.0266425	0.11614
Naglu	5	8.31	8	13.46	29	50.78	12	19.49	10.885	35.135	1.69057	0.000176835	0.00261204
Crip1	47	78.14	17	28.61	98	171.6	106	172.15	53.375	171.875	1.68712	2.79e-18	3.21e-16
Ctsb	377	626.82	345	580.6	1162	2034.65	1128	1831.93	603.71	1933.29	1.67913	1.9e-178	3.17e-175
Cep128	3	4.99	2	3.37	6	10.51	10	16.24	4.18	13.375	1.67796	0.0266425	0.11614
Ccdc80	19	31.59	3	5.05	48	84.05	20	32.48	18.32	58.265	1.66921	8.42e-07	2.66e-05
Ecm1	7	11.64	3	5.05	21	36.77	10	16.24	8.345	26.505	1.66728	0.00145841	0.0142981
Rrp9	7	11.64	3	5.05	8	14.01	24	38.98	8.345	26.495	1.66674	0.000946306	0.0100885
Gab3	2	3.33	2	3.37	1	1.75	12	19.49	3.35	10.62	1.66455	0.049089	0.174756
Dgkg	6	9.98	2	3.37	13	22.76	12	19.49	6.675	21.125	1.66211	0.00456756	0.0332218
Cd63-ps	9	14.96	7	11.78	21	36.77	29	47.1	13.37	41.935	1.64916	3.38e-05	0.000677977
Plekhm1	3	4.99	4	6.73	7	12.26	15	24.36	5.86	18.31	1.64366	0.00815246	0.0510997
Ctsc	11	18.29	11	18.51	21	36.77	48	77.95	18.4	57.36	1.64034	8.42e-07	2.66e-05
Cebpa	13	21.61	7	11.78	31	54.28	30	48.72	16.695	51.5	1.62516	5.78e-06	0.000149242
Lmf1	6	9.98	10	16.83	24	42.02	25	40.6	13.405	41.31	1.62372	5.15e-05	0.000954441
Isoc2a	3	4.99	2	3.37	11	19.26	4	6.5	4.18	12.88	1.62356	0.0414394	0.15532
Anxa4	18	29.93	10	16.83	33	57.78	53	86.07	23.38	71.925	1.62122	5.05e-08	2.08e-06
Ctsl	92	152.96	104	175.02	295	516.54	302	490.46	163.99	503.5	1.61838	1.15e-47	3.71e-45
Polrmt	5	8.31	1	1.68	11	19.26	7	11.37	4.995	15.315	1.61639	0.0226956	0.103903
Net1	10	16.63	1	1.68	20	35.02	13	21.11	9.155	28.065	1.61614	0.0012676	0.01287
Cebpb	10	16.63	8	13.46	34	59.53	20	32.48	15.045	46.005	1.61251	2.61e-05	0.000543841
Gale	9	14.96	1	1.68	16	28.02	14	22.74	8.32	25.38	1.60904	0.00223244	0.0197212
Crot	6	9.98	8	13.46	24	42.02	18	29.23	11.72	35.625	1.60392	0.000236738	0.00332497
Rhoc	24	39.9	23	38.71	64	112.06	78	126.68	39.305	119.37	1.60266	3.08e-12	2.2e-10
Slc19a2	3	4.99	2	3.37	8	14.01	7	11.37	4.18	12.69	1.60212	0.0414394	0.15532
Cyp4v3	5	8.31	1	1.68	8	14.01	10	16.24	4.995	15.125	1.59838	0.0226956	0.103903
Hlcs	7	11.64	6	10.1	19	33.27	20	32.48	10.87	32.875	1.59664	0.000412988	0.00528794
Dusp5	3	4.99	2	3.37	7	12.26	8	12.99	4.18	12.625	1.59471	0.0414394	0.15532
Cebpd	32	53.21	18	30.29	92	161.09	56	90.95	41.75	126.02	1.5938	1.43e-12	1.09e-10
Dck	3	4.99	2	3.37	6	10.51	9	14.62	4.18	12.565	1.58784	0.0414394	0.15532
Ifi35	3	4.99	2	3.37	6	10.51	9	14.62	4.18	12.565	1.58784	0.0414394	0.15532
Adgrl4	6	9.98	11	18.51	21	36.77	30	48.72	14.245	42.745	1.5853	4.52e-05	0.000852431
Ftl1	405	673.38	322	541.89	780	1365.77	1404	2280.17	607.635	1822.97	1.58501	1.66e-157	1.84e-154
Gm12184	4	6.65	2	3.37	6	10.51	12	19.49	5.01	15	1.58208	0.0226956	0.103903
Prkcd	16	26.6	24	40.39	57	99.81	62	100.69	33.495	100.25	1.58158	2.85e-10	1.66e-08
Fes	3	4.99	2	3.37	5	8.75	10	16.24	4.18	12.495	1.57978	0.0414394	0.15532
Sco1	3	4.99	2	3.37	5	8.75	10	16.24	4.18	12.495	1.57978	0.0414394	0.15532
Crls1	14	23.28	7	11.78	29	50.78	33	53.59	17.53	52.185	1.57381	7.66e-06	0.000189234
Prkab1	6	9.98	4	6.73	20	35.02	9	14.62	8.355	24.82	1.57079	0.00339296	0.0268218
Cblb	3	4.99	7	11.78	21	36.77	8	12.99	8.385	24.88	1.5691	0.00339296	0.0268218
Klk6	72	119.71	42	70.68	170	297.67	162	263.1	95.195	280.385	1.55845	5.61e-26	9.83e-24
Ganc	5	8.31	5	8.41	16	28.02	13	21.11	8.36	24.565	1.55503	0.00339296	0.0268218
Arf2	10	16.63	20	33.66	50	87.55	37	60.09	25.145	73.82	1.55374	8.92e-08	3.53e-06
Gm31763	5	8.31	2	3.37	14	24.51	6	9.74	5.84	17.125	1.55206	0.019197	0.0931723
Btbd11	6	9.98	6	10.1	2	3.5	34	55.22	10.04	29.36	1.54809	0.000722406	0.00824257
Sema4c	3	4.99	7	11.78	15	26.26	14	22.74	8.385	24.5	1.5469	0.00339296	0.0268218
H2-D1	76	126.36	63	106.02	175	306.42	224	363.79	116.19	335.105	1.52813	3.35e-30	6.7e-28
Lin54	3	4.99	6	10.1	9	15.76	17	27.61	7.545	21.685	1.5231	0.00600951	0.0407701
Acvrl1	7	11.64	4	6.73	19	33.27	12	19.49	9.185	26.38	1.52209	0.0029016	0.0240398
Mynn	4	6.65	2	3.37	9	15.76	8	12.99	5.01	14.375	1.52068	0.0347408	0.139048
Cnn2	4	6.65	6	10.1	18	31.52	10	16.24	8.375	23.88	1.51164	0.00511813	0.0361195
Gadd45a	7	11.64	6	10.1	12	21.01	25	40.6	10.87	30.805	1.50281	0.000942944	0.0100794
Fyb	17	28.27	2	3.37	28	49.03	25	40.6	15.82	44.815	1.50223	7.67e-05	0.00133312
Lhfpl2	19	31.59	10	16.83	27	47.28	55	89.32	24.21	68.3	1.49628	5.08e-07	1.74e-05
Rnls	6	9.98	2	3.37	15	26.26	7	11.37	6.675	18.815	1.49504	0.0161638	0.0821749
Rhoq	17	28.27	18	30.29	51	89.3	46	74.71	29.28	82.005	1.4858	6.67e-08	2.68e-06
Rnft1	9	14.96	6	10.1	27	47.28	14	22.74	12.53	35.01	1.48238	0.000691361	0.00798338
Mapk6	11	18.29	11	18.51	26	45.53	35	56.84	18.4	51.185	1.47602	2.22e-05	0.000471848
Gorasp1	6	9.98	3	5.05	9	15.76	16	25.98	7.515	20.87	1.47359	0.00906983	0.0555749
Gpr137b-ps	5	8.31	2	3.37	12	21.01	7	11.37	5.84	16.19	1.47106	0.0290105	0.123269
Gm28928	3	4.99	10	16.83	15	26.26	21	34.11	10.91	30.185	1.46818	0.00141194	0.0139382
Rnf149	5	8.31	9	15.15	12	21.01	27	43.85	11.73	32.43	1.46713	0.000808593	0.00907511
Crtap	3	4.99	5	8.41	10	17.51	12	19.49	6.7	18.5	1.46529	0.0161638	0.0821749
Sec22c	4	6.65	3	5.05	11	19.26	8	12.99	5.85	16.125	1.46279	0.0290105	0.123269
Acaa1b	5	8.31	2	3.37	10	17.51	9	14.62	5.84	16.065	1.45988	0.0290105	0.123269
Kcns1	10	16.63	3	5.05	22	38.52	13	21.11	10.84	29.815	1.45967	0.00210072	0.01879
Creg1	30	49.88	30	50.49	61	106.81	104	168.9	50.185	137.855	1.45782	1.85e-12	1.38e-10
Slc5a3	25	41.57	6	10.1	56	98.06	27	43.85	25.835	70.955	1.45758	8.31e-07	2.66e-05
Fcgrt	16	26.6	7	11.78	37	64.79	25	40.6	19.19	52.695	1.45731	2.82e-05	0.00058047
Pou2f3	5	8.31	2	3.37	9	15.76	10	16.24	5.84	16	1.45403	0.0290105	0.123269
Entpd2	9	14.96	14	23.56	43	75.29	18	29.23	19.26	52.26	1.4401	2.82e-05	0.00058047
Nek6	23	38.24	21	35.34	62	108.56	56	90.95	36.79	99.755	1.43908	5.68e-09	2.68e-07
Rnf19b	11	18.29	11	18.51	38	66.54	20	32.48	18.4	49.51	1.42801	7.12e-05	0.00125883
Ckap4	6	9.98	15	25.24	29	50.78	27	43.85	17.61	47.315	1.4259	8.34e-05	0.0014188
1810058I24Rik	34	56.53	32	53.85	90	157.59	85	138.04	55.19	147.815	1.42131	1.15e-12	8.82e-11
Bcl6	10	16.63	4	6.73	19	33.27	18	29.23	11.68	31.25	1.41982	0.0017809	0.0165665
Lhpp	7	11.64	4	6.73	16	28.02	13	21.11	9.185	24.565	1.41925	0.00645252	0.043046
Pdgfb	10	16.63	1	1.68	14	24.51	15	24.36	9.155	24.435	1.41632	0.00645252	0.043046
Rnf122	13	21.61	16	26.93	46	80.55	30	48.72	24.27	64.635	1.41314	3.55e-06	9.6e-05
Fbxo42	3	4.99	8	13.46	16	28.02	13	21.11	9.225	24.565	1.41298	0.00645252	0.043046
Kcne1l	4	6.65	12	20.19	24	42.02	18	29.23	13.42	35.625	1.40851	0.000869085	0.00959255
Matn4	8	13.3	12	20.19	35	61.28	17	27.61	16.745	44.445	1.40829	0.000210391	0.0030142
Dnase2a	16	26.6	7	11.78	30	52.53	30	48.72	19.19	50.625	1.3995	6.08e-05	0.00110085
Slc39a1	16	26.6	18	30.29	41	71.79	48	77.95	28.445	74.87	1.39621	7.72e-07	2.5e-05
S100a6	336	558.65	164	275.99	766	1341.26	525	852.63	417.32	1096.94	1.39427	2.76e-79	1.38e-76
Blnk	6	9.98	6	10.1	19	33.27	12	19.49	10.04	26.38	1.39369	0.00542593	0.0376501
Krba1	9	14.96	2	3.37	21	36.77	7	11.37	9.165	24.07	1.39303	0.00950948	0.0574591
Gar1	8	13.3	8	13.46	16	28.02	26	42.23	13.38	35.125	1.39242	0.000869085	0.00959255
Bin2	7	11.64	8	13.46	20	35.02	19	30.86	12.55	32.94	1.39215	0.00150706	0.0146744
Smc4	6	9.98	12	20.19	22	38.52	25	40.6	15.085	39.56	1.39093	0.000426589	0.00542734
Nrp2	6	9.98	16	26.93	20	35.02	38	61.71	18.455	48.365	1.38995	7.12e-05	0.00125883
Pabpc4	14	23.28	5	8.41	26	45.53	23	37.35	15.845	41.44	1.387	0.000362006	0.00473831
B3galt4	5	8.31	2	3.37	10	17.51	8	12.99	5.84	15.25	1.38477	0.0433497	0.159433
Klhl42	8	13.3	7	11.78	16	28.02	23	37.35	12.54	32.685	1.38209	0.00150706	0.0146744
Ier3	7	11.64	12	20.19	39	68.29	9	14.62	15.915	41.455	1.38116	0.000362006	0.00473831
Asah1	29	48.22	25	42.07	68	119.07	71	115.31	45.145	117.19	1.37621	8.68e-10	4.64e-08
Ccnd1	44	73.16	47	79.1	119	208.37	115	186.77	76.13	197.57	1.37583	1.03e-15	9.55e-14
Scly	9	14.96	8	13.46	18	31.52	26	42.23	14.21	36.875	1.37574	0.000736584	0.00835129
Hscb	6	9.98	6	10.1	13	22.76	18	29.23	10.04	25.995	1.37247	0.00542593	0.0376501
Sfmbt1	11	18.29	5	8.41	20	35.02	21	34.11	13.35	34.565	1.37247	0.00127347	0.0128894
Adgrl2	18	29.93	9	15.15	36	63.04	33	53.59	22.54	58.315	1.37138	2.2e-05	0.000467311
Cav1	21	34.92	9	15.15	59	103.31	16	25.98	25.035	64.645	1.36859	9.35e-06	0.000223607
Itgam	13	21.61	14	23.56	36	63.04	33	53.59	22.585	58.315	1.3685	2.2e-05	0.000467311
Mfsd12	8	13.3	17	28.61	33	57.78	31	50.35	20.955	54.065	1.3674	4.4e-05	0.000834189
Borcs6	6	9.98	6	10.1	11	19.26	20	32.48	10.04	25.87	1.36552	0.00542593	0.0376501
Med11	2	3.33	14	23.56	19	33.27	22	35.73	13.445	34.5	1.35953	0.00127347	0.0128894
Pald1	9	14.96	6	10.1	18	31.52	20	32.48	12.53	32	1.35269	0.00220472	0.0195801
Pde9a	5	8.31	4	6.73	8	14.01	15	24.36	7.52	19.185	1.35117	0.0201104	0.0958553
Neu4	6	9.98	7	11.78	15	26.26	18	29.23	10.88	27.745	1.35055	0.00455656	0.0332111
Serpina3n	50	83.13	82	138	186	325.68	146	237.11	110.565	281.395	1.3477	2.77e-21	3.85e-19
Cotl1	68	113.06	83	139.68	178	311.68	204	331.31	126.37	321.495	1.34714	3.22e-24	5.03e-22
Pon3	4	6.65	3	5.05	4	7	14	22.74	5.85	14.87	1.3459	0.0433497	0.159433
Sf3b4	15	24.94	15	25.24	44	77.04	31	50.35	25.09	63.695	1.34407	1.35e-05	0.00030662
Ier5	23	38.24	11	18.51	47	82.3	38	61.71	28.375	72.005	1.34348	3.39e-06	9.22e-05
Lcp1	6	9.98	9	15.15	29	50.78	8	12.99	12.565	31.885	1.34347	0.00320462	0.0258854
Adra2c	6	9.98	3	5.05	19	33.27	3	4.87	7.515	19.07	1.34346	0.0295114	0.124468
Col27a1	3	4.99	5	8.41	12	21.01	8	12.99	6.7	17	1.3433	0.0357618	0.140671
Pnpo	17	28.27	20	33.66	31	54.28	63	102.32	30.965	78.3	1.33837	7e-07	2.3e-05
Cabp7	4	6.65	4	6.73	10	17.51	10	16.24	6.69	16.875	1.33481	0.0357618	0.140671
Il4ra	3	4.99	6	10.1	18	31.52	4	6.5	7.545	19.01	1.33317	0.0295114	0.124468
Ehd4	9	14.96	4	6.73	21	36.77	11	17.86	10.845	27.315	1.33266	0.00663874	0.0439652
Recql5	3	4.99	5	8.41	10	17.51	10	16.24	6.7	16.875	1.33265	0.0357618	0.140671
Junb	29	48.22	17	28.61	65	113.81	49	79.58	38.415	96.695	1.33177	5.61e-08	2.29e-06
Agtrap	7	11.64	6	10.1	8	14.01	25	40.6	10.87	27.305	1.32881	0.00455656	0.0332111
Crhr1	1	1.66	6	10.1	1	1.75	17	27.61	5.88	14.68	1.31996	0.0433497	0.159433
Eaf1	12	19.95	6	10.1	15	26.26	30	48.72	15.025	37.49	1.31914	0.000906282	0.00989914
Miip	2	3.33	8	13.46	10	17.51	15	24.36	8.395	20.935	1.31831	0.0167206	0.0843198
Aebp1	38	63.18	3	5.05	73	127.82	26	42.23	34.115	85.025	1.31748	7.56e-07	2.46e-05
Hnrnpf	20	33.25	19	31.97	52	91.05	44	71.46	32.61	81.255	1.31714	1.05e-06	3.24e-05
Asb6	14	23.28	4	6.73	26	45.53	18	29.23	15.005	37.38	1.31682	0.00131006	0.0131661
Cables2	7	11.64	6	10.1	4	7	29	47.1	10.87	27.05	1.31528	0.00455656	0.0332111
Efhd2	72	119.71	69	116.12	186	325.68	160	259.85	117.915	292.765	1.312	2.98e-21	4.08e-19
Plekho1	23	38.24	6	10.1	37	64.79	34	55.22	24.17	60.005	1.31187	3.29e-05	0.000668266
Apbb1ip	5	8.31	7	11.78	21	36.77	8	12.99	10.045	24.88	1.30851	0.0115495	0.0656594
Smn1	4	6.65	13	21.88	19	33.27	23	37.35	14.265	35.31	1.3076	0.00155933	0.0149504
Rab37	7	11.64	4	6.73	11	19.26	16	25.98	9.185	22.62	1.30025	0.0138973	0.0741586
Ogdhl	3	4.99	9	15.15	18	31.52	11	17.86	10.07	24.69	1.29386	0.0115495	0.0656594
Crem	3	4.99	8	13.46	10	17.51	17	27.61	9.225	22.56	1.29015	0.0138973	0.0741586
Nit2	3	4.99	8	13.46	10	17.51	17	27.61	9.225	22.56	1.29015	0.0138973	0.0741586
Slc35f5	8	13.3	7	11.78	21	36.77	15	24.36	12.54	30.565	1.28534	0.00462684	0.0334309
1700030K09Rik	6	9.98	7	11.78	21	36.77	10	16.24	10.88	26.505	1.28459	0.0095988	0.0578399
Nrp1	16	26.6	10	16.83	40	70.04	22	35.73	21.715	52.885	1.28417	0.00011183	0.00179502
Smim3	3	4.99	9	15.15	15	26.26	14	22.74	10.07	24.5	1.28272	0.0115495	0.0656594
Gfra1	22	36.58	7	11.78	31	54.28	39	63.34	24.18	58.81	1.28225	4.7e-05	0.000884277
Gpr137b	5	8.31	12	20.19	19	33.27	22	35.73	14.25	34.5	1.27563	0.00224875	0.0197953
Aph1b	8	13.3	6	10.1	24	42.02	9	14.62	11.7	28.32	1.27531	0.00797882	0.0503078
Plxna1	2	3.33	12	20.19	12	21.01	22	35.73	11.76	28.37	1.27048	0.00554291	0.0381914
Prkx	1	1.66	8	13.46	18	31.52	3	4.87	7.56	18.195	1.26708	0.0428509	0.158884
Nifk	11	18.29	1	1.68	20	35.02	8	12.99	9.985	24.005	1.2655	0.0166424	0.0840525
Lmo2	16	26.6	3	5.05	23	40.27	22	35.73	15.825	38	1.26379	0.00157612	0.015025
Hps3	6	9.98	4	6.73	9	15.76	15	24.36	8.355	20.06	1.26361	0.0243661	0.108923
B2m	111	184.55	88	148.09	222	388.72	251	407.64	166.32	398.18	1.25946	1.29e-26	2.3e-24
Pik3r5	5	8.31	6	10.1	12	21.01	14	22.74	9.205	21.875	1.24879	0.0201305	0.0958595
Gm45341	3	4.99	6	10.1	1	1.75	21	34.11	7.545	17.93	1.24878	0.0295114	0.124468
Slc25a30	5	8.31	4	6.73	12	21.01	9	14.62	7.52	17.815	1.24429	0.0428509	0.158884
Spry2	15	24.94	11	18.51	29	50.78	32	51.97	21.725	51.375	1.24171	0.000227159	0.0032136
Slc29a1	7	11.64	4	6.73	8	14.01	18	29.23	9.185	21.62	1.23501	0.0201305	0.0958595
Flt1	36	59.86	34	57.22	108	189.11	53	86.07	58.54	137.59	1.23288	1.58e-09	8.13e-08
Inpp5d	13	21.61	9	15.15	27	47.28	24	38.98	18.38	43.13	1.23055	0.000924	0.00998828
Hexa	114	189.54	91	153.14	206	360.7	271	440.12	171.34	400.41	1.22462	7.45e-26	1.28e-23
Neurod6	5	8.31	6	10.1	19	33.27	6	9.74	9.205	21.505	1.22418	0.0288878	0.123241
Aimp2	11	18.29	8	13.46	21	36.77	23	37.35	15.875	37.06	1.22311	0.00224512	0.0197808
Man2b1	31	51.54	24	40.39	52	91.05	76	123.43	45.965	107.24	1.22224	7.42e-08	2.94e-06
Flna	28	46.55	18	30.29	53	92.8	53	86.07	38.42	89.435	1.21898	1.32e-06	3.88e-05
St6galnac4	8	13.3	11	18.51	20	35.02	24	38.98	15.905	37	1.21804	0.00224512	0.0197808
Npc2	95	157.95	103	173.34	218	381.72	237	384.9	165.645	383.31	1.21042	3.18e-24	5.03e-22
Sec61a2	14	23.28	18	30.29	42	73.54	31	50.35	26.785	61.945	1.20956	7.98e-05	0.00137504
Paqr3	10	16.63	4	6.73	16	28.02	16	25.98	11.68	27	1.20892	0.011398	0.0650357
Dusp1	11	18.29	7	11.78	23	40.27	18	29.23	15.035	34.75	1.20869	0.00381908	0.0291533
Ero1l	11	18.29	20	33.66	50	87.55	20	32.48	25.975	60.015	1.2082	9.5e-05	0.00156712
Ptpre	9	14.96	15	25.24	28	49.03	27	43.85	20.1	46.44	1.20817	0.00064718	0.00759601
Cd63	249	414	156	262.53	433	758.18	495	803.91	338.265	781.045	1.20725	7.62e-47	2.31e-44
Rnf123	2	3.33	8	13.46	11	19.26	12	19.49	8.395	19.375	1.20659	0.0351564	0.139863
Ethe1	7	11.64	6	10.1	10	17.51	20	32.48	10.87	24.995	1.20129	0.0137681	0.0739427
Plcg2	9	14.96	3	5.05	17	29.77	10	16.24	10.005	23.005	1.20123	0.02377	0.107362
1810041L15Rik	17	28.27	24	40.39	28	49.03	67	108.81	34.33	78.92	1.20092	4.33e-06	0.000114437
Klhl12	5	8.31	6	10.1	13	22.76	12	19.49	9.205	21.125	1.19846	0.0288878	0.123241
Ddit3	48	79.81	49	82.46	75	131.32	148	240.36	81.135	185.84	1.19566	1.06e-12	8.22e-11
1700088E04Rik	12	19.95	2	3.37	11	19.26	21	34.11	11.66	26.685	1.19446	0.011398	0.0650357
Errfi1	14	23.28	10	16.83	32	56.03	22	35.73	20.055	45.88	1.1939	0.000911284	0.00989914
Irf8	16	26.6	8	13.46	18	31.52	37	60.09	20.03	45.805	1.19334	0.00064718	0.00759601
Ptcd1	6	9.98	6	10.1	16	28.02	11	17.86	10.04	22.94	1.19211	0.02377	0.107362
Snhg5	10	16.63	6	10.1	20	35.02	16	25.98	13.365	30.5	1.19035	0.00782684	0.0495997
Noc4l	6	9.98	4	6.73	6	10.51	17	27.61	8.355	19.06	1.18984	0.0351564	0.139863
Leng9	4	6.65	7	11.78	10	17.51	15	24.36	9.215	20.935	1.18386	0.0288878	0.123241
Rnaseh2b	5	8.31	8	13.46	18	31.52	11	17.86	10.885	24.69	1.18159	0.0195836	0.0942426
Ephb3	9	14.96	3	5.05	12	21.01	15	24.36	10.005	22.685	1.18102	0.02377	0.107362
Cdkn1a	29	48.22	21	35.34	69	120.82	42	68.21	41.78	94.515	1.17773	1.3e-06	3.84e-05
Snx24	9	14.96	14	23.56	33	57.78	18	29.23	19.26	43.505	1.17557	0.0015313	0.0147875
Bgn	11	18.29	12	20.19	44	77.04	6	9.74	19.24	43.39	1.17325	0.0015313	0.0147875
Msn	28	46.55	36	60.58	83	145.33	59	95.82	53.565	120.575	1.17057	4.43e-08	1.84e-06
Rnase4	27	44.89	16	26.93	58	101.56	37	60.09	35.91	80.825	1.17042	8.41e-06	0.000203633
Chchd5	12	19.95	5	8.41	16	28.02	22	35.73	14.18	31.875	1.16857	0.00649185	0.0432501
Pcna	25	41.57	21	35.34	54	94.55	48	77.95	38.455	86.25	1.16535	5e-06	0.000131881
Mcl1	46	76.48	36	60.58	87	152.34	95	154.29	68.53	153.315	1.16169	7.92e-10	4.33e-08
Ctsa	108	179.57	69	116.12	176	308.17	217	352.42	147.845	330.295	1.15967	6.22e-20	7.88e-18
Sgpp2	4	6.65	8	13.46	8	14.01	19	30.86	10.055	22.435	1.15784	0.02377	0.107362
Rrbp1	56	93.11	38	63.95	129	225.88	76	123.43	78.53	174.655	1.15319	4.72e-11	2.95e-09
Syt2	2	3.33	24	40.39	10	17.51	49	79.58	21.86	48.545	1.15103	0.000453374	0.00570282
Mboat1	12	19.95	7	11.78	30	52.53	11	17.86	15.865	35.195	1.14952	0.00625584	0.0422407
Senp1	9	14.96	10	16.83	18	31.52	24	38.98	15.895	35.25	1.14905	0.00447383	0.0328716
Itgav	50	83.13	46	77.41	117	204.87	93	151.04	80.27	177.955	1.14858	3.38e-11	2.15e-09
Esam	10	16.63	4	6.73	11	19.26	20	32.48	11.68	25.87	1.14724	0.0161532	0.0821749
Ctbp2	10	16.63	12	20.19	27	47.28	21	34.11	18.41	40.695	1.14436	0.00256944	0.0219491
Ly6g6f	5	8.31	7	11.78	17	29.77	9	14.62	10.045	22.195	1.14376	0.0336357	0.135683
Gm6166	16	26.6	13	21.88	25	43.77	39	63.34	24.24	53.555	1.14363	0.000371491	0.00484975
Rgcc	27	44.89	10	16.83	50	87.55	30	48.72	30.86	68.135	1.14266	6.45e-05	0.00116375
Mapkapk2	28	46.55	47	79.1	74	129.57	91	147.79	62.825	138.68	1.14235	6.82e-09	3.17e-07
F3	39	64.84	33	55.54	110	192.61	45	73.08	60.19	132.845	1.14215	2.16e-08	9.52e-07
Swap70	9	14.96	3	5.05	15	26.26	11	17.86	10.005	22.06	1.14071	0.0336357	0.135683
Aco1	16	26.6	3	5.05	25	43.77	16	25.98	15.825	34.875	1.13999	0.00625584	0.0422407
Arhgap22	4	6.65	8	13.46	16	28.02	10	16.24	10.055	22.13	1.13809	0.0336357	0.135683
Mcur1	11	18.29	13	21.88	31	54.28	21	34.11	20.085	44.195	1.13776	0.00177943	0.0165665
Cndp2	29	48.22	34	57.22	60	105.06	77	125.05	52.72	115.055	1.1259	1.92e-07	7.29e-06
Mical1	14	23.28	12	20.19	30	52.53	26	42.23	21.735	47.38	1.12426	0.00123435	0.0126298
Coq3	8	13.3	4	6.73	11	19.26	15	24.36	10.015	21.81	1.12283	0.0336357	0.135683
D030056L22Rik	8	13.3	14	23.56	31	54.28	16	25.98	18.43	40.13	1.12263	0.003573	0.027937
Ginm1	6	9.98	9	15.15	8	14.01	25	40.6	12.565	27.305	1.11975	0.0133378	0.0727252
Gpr108	19	31.59	14	23.56	35	61.28	36	58.47	27.575	59.875	1.11859	0.000251661	0.00350504
H2-K1	56	93.11	43	72.36	105	183.85	108	175.4	82.735	179.625	1.11842	5.33e-11	3.29e-09
Serf1	18	29.93	29	48.8	51	89.3	50	81.2	39.365	85.25	1.11479	1.11e-05	0.000259537
Myh9	30	49.88	18	30.29	49	85.8	54	87.7	40.085	86.75	1.1138	9.3e-06	0.000223528
Cdpf1	10	16.63	4	6.73	14	24.51	16	25.98	11.68	25.245	1.11196	0.0227024	0.103903
Galc	15	24.94	19	31.97	35	61.28	38	61.71	28.455	61.495	1.11179	0.000210375	0.0030142
Myl12a	42	69.83	37	62.27	74	129.57	96	155.91	66.05	142.74	1.11176	8.96e-09	4.07e-07
Htatip2	6	9.98	8	13.46	15	26.26	15	24.36	11.72	25.31	1.11073	0.0227024	0.103903
Supv3l1	6	9.98	6	10.1	21	36.77	4	6.5	10.04	21.635	1.10761	0.0471321	0.170029
Lpcat2	13	21.61	4	6.73	20	35.02	16	25.98	14.17	30.5	1.10597	0.0127185	0.0702148
Pabpc1	126	209.49	136	228.87	270	472.77	288	467.73	219.18	470.25	1.10131	2.11e-25	3.58e-23
Sppl2b	10	16.63	13	21.88	24	42.02	25	40.6	19.255	41.31	1.10126	0.00296808	0.0244397
Jagn1	12	19.95	19	31.97	33	57.78	33	53.59	25.96	55.685	1.101	0.000497808	0.00614577
Ccdc71l	8	13.3	6	10.1	10	17.51	20	32.48	11.7	24.995	1.09513	0.0227024	0.103903
Sertad2	8	13.3	14	23.56	19	33.27	28	45.47	18.43	39.37	1.09504	0.003573	0.027937
Hbegf	17	28.27	16	26.93	46	80.55	23	37.35	27.6	58.95	1.09482	0.000346949	0.00458321
3632451O06Rik	6	9.98	14	23.56	14	24.51	29	47.1	16.77	35.805	1.09428	0.00518705	0.0364771
Arpc1b	116	192.87	94	158.19	173	302.92	275	446.61	175.53	374.765	1.09427	1.21e-20	1.59e-18
4930430F08Rik	9	14.96	4	6.73	19	33.27	8	12.99	10.845	23.13	1.09274	0.0385734	0.14844
Lgmn	112	186.22	146	245.7	281	492.03	262	425.5	215.96	458.765	1.08699	3.39e-24	5.22e-22
Gpx1	185	307.59	201	338.26	338	591.84	480	779.55	322.925	685.695	1.08637	1.42e-35	3.47e-33
Laptm5	45	74.82	76	127.9	126	220.62	129	209.5	101.36	215.06	1.08525	2.44e-12	1.77e-10
Aga	9	14.96	10	16.83	19	33.27	21	34.11	15.895	33.69	1.08375	0.00869005	0.0535761
Ifitm2	6	9.98	13	21.88	20	35.02	20	32.48	15.93	33.75	1.08314	0.00869005	0.0535761
Snx6	25	41.57	37	62.27	54	94.55	77	125.05	51.92	109.8	1.08052	8.06e-07	2.59e-05
Mt2	1006	1672.63	964	1622.31	1764	3088.75	2386	3874.99	1647.47	3481.87	1.07961	1.16e-160	1.46e-157
Reep3	31	51.54	50	84.14	81	141.83	89	144.54	67.84	143.185	1.07767	2.21e-08	9.68e-07
Nup54	3	4.99	9	15.15	15	26.26	10	16.24	10.07	21.25	1.0774	0.0471321	0.170029
Mmp14	9	14.96	9	15.15	27	47.28	10	16.24	15.055	31.76	1.07697	0.0145205	0.0764638
Arhgdib	19	31.59	7	11.78	29	50.78	25	40.6	21.685	45.69	1.07518	0.00234779	0.0205226
Edem3	12	19.95	16	26.93	36	63.04	22	35.73	23.44	49.385	1.0751	0.001624	0.0154226
Hddc2	2	3.33	11	18.51	17	29.77	10	16.24	10.92	23.005	1.07497	0.0385734	0.14844
Atic	10	16.63	6	10.1	21	36.77	12	19.49	13.365	28.13	1.07365	0.0213727	0.0997512
Lrp8	11	18.29	4	6.73	18	31.52	13	21.11	12.51	26.315	1.0728	0.0259807	0.114251
Fam149a	8	13.3	4	6.73	12	21.01	13	21.11	10.015	21.06	1.07234	0.0471321	0.170029
Gab2	16	26.6	15	25.24	39	68.29	25	40.6	25.92	54.445	1.07073	0.0009375	0.0100375
1110012L19Rik	11	18.29	5	8.41	19	33.27	14	22.74	13.35	28.005	1.06884	0.0213727	0.0997512
Fnip2	15	24.94	14	23.56	33	57.78	27	43.85	24.25	50.815	1.06727	0.00135164	0.0134224
Cd151	25	41.57	30	50.49	60	105.06	54	87.7	46.03	96.38	1.06616	5.1e-06	0.000133751
Rab3ip	10	16.63	9	15.15	24	42.02	15	24.36	15.89	33.19	1.06263	0.0119891	0.0674584
Podxl	7	11.64	7	11.78	13	22.76	16	25.98	11.71	24.37	1.05737	0.03163	0.130487
Ndufaf1	10	16.63	12	20.19	15	26.26	31	50.35	18.41	38.305	1.05704	0.00493939	0.0352059
Epb41l4aos	15	24.94	16	26.93	31	54.28	33	53.59	25.935	53.935	1.05632	0.0009375	0.0100375
Fgf2	8	13.3	10	16.83	19	33.27	18	29.23	15.065	31.25	1.05266	0.0145205	0.0764638
Bag3	9	14.96	11	18.51	22	38.52	19	30.86	16.735	34.69	1.05165	0.00990897	0.0591227
Fam46a	12	19.95	8	13.46	21	36.77	20	32.48	16.705	34.625	1.05153	0.00990897	0.0591227
Smcr8	15	24.94	3	5.05	16	28.02	21	34.11	14.995	31.065	1.05081	0.0145205	0.0764638
Klhdc8a	5	8.31	13	21.88	6	10.51	32	51.97	15.095	31.24	1.04932	0.0105081	0.0619945
Sdf2l1	12	19.95	9	15.15	21	36.77	22	35.73	17.55	36.25	1.04651	0.00819729	0.0512651
Man2b2	7	11.64	9	15.15	13	22.76	20	32.48	13.395	27.62	1.04402	0.0213727	0.0997512
Ino80d	15	24.94	14	23.56	20	35.02	40	64.96	24.25	49.99	1.04365	0.00135164	0.0134224
Pold4	14	23.28	21	35.34	43	75.29	28	45.47	29.31	60.38	1.04268	0.000453091	0.00570282
Man1c1	22	36.58	14	23.56	29	50.78	45	73.08	30.07	61.93	1.04231	0.000378102	0.0049232
Gps1	13	21.61	9	15.15	20	35.02	25	40.6	18.38	37.81	1.04063	0.00678702	0.0447103
Myo1e	25	41.57	12	20.19	54	94.55	20	32.48	30.88	63.515	1.04042	0.000428744	0.00544091
Bhlhe40	42	69.83	25	42.07	69	120.82	67	108.81	55.95	114.815	1.0371	1.15e-06	3.49e-05
Chfr	11	18.29	3	5.05	18	31.52	10	16.24	11.67	23.88	1.033	0.0436679	0.160132
Atxn2l	21	34.92	7	11.78	23	40.27	34	55.22	23.35	47.745	1.03193	0.0022185	0.0196502
Gmip	12	19.95	2	3.37	17	29.77	11	17.86	11.66	23.815	1.0303	0.0436679	0.160132
Dhrs1	94	156.29	134	225.51	229	400.98	233	378.4	190.9	389.69	1.02951	2.43e-19	2.89e-17
Atf6b	6	9.98	15	25.24	29	50.78	13	21.11	17.61	35.945	1.0294	0.0112044	0.0645164
Fam129b	34	56.53	31	52.17	65	113.81	66	107.19	54.35	110.5	1.02369	2.96e-06	8.16e-05
Bin3	6	9.98	9	15.15	18	31.52	12	19.49	12.565	25.505	1.02137	0.0358008	0.140671
Gsdme	7	11.64	7	11.78	16	28.02	12	19.49	11.71	23.755	1.02049	0.0436679	0.160132
Ext1	19	31.59	29	48.8	56	98.06	40	64.96	40.195	81.51	1.01996	5.96e-05	0.00108477
Lamb2	28	46.55	11	18.51	53	92.8	24	38.98	32.53	65.89	1.01829	0.000403895	0.00518479
Gdf11	7	11.64	13	21.88	23	40.27	17	27.61	16.76	33.94	1.01796	0.0135585	0.0732257
Rgs6	26	43.23	31	52.17	49	85.8	66	107.19	47.7	96.495	1.01646	1.21e-05	0.000279522
Coasy	10	16.63	14	23.56	25	43.77	23	37.35	20.095	40.56	1.01322	0.00635638	0.0427579
Gga2	12	19.95	9	15.15	33	57.78	8	12.99	17.55	35.385	1.01167	0.0112044	0.0645164
Gm14164	15	24.94	23	38.71	24	42.02	53	86.07	31.825	64.045	1.00893	0.000357829	0.00470827
Ppp1r10	14	23.28	20	33.66	32	56.03	36	58.47	28.47	57.25	1.00783	0.00100114	0.0106053
Gm10275	9	14.96	8	13.46	15	26.26	19	30.86	14.21	28.56	1.00709	0.0241822	0.108586
Fam189a2	5	8.31	12	20.19	16	28.02	18	29.23	14.25	28.625	1.00631	0.0241822	0.108586
Alkbh8	16	26.6	6	10.1	29	50.78	14	22.74	18.35	36.76	1.00236	0.0125734	0.0696974
Golph3l	7	11.64	7	11.78	11	19.26	17	27.61	11.71	23.435	1.00092	0.0436679	0.160132
Soat1	28	46.55	14	23.56	43	75.29	40	64.96	35.055	70.125	1.00031	0.0003165	0.00424394
Cald1	35	58.19	32	53.85	19	33.27	14	22.74	56.02	28.005	-1.00026	0.000886633	0.00973253
Kcnq5	78	129.69	29	48.8	37	64.79	15	24.36	89.245	44.575	-1.00154	3.3e-05	0.000669205
Dab1	66	109.74	37	62.27	37	64.79	13	21.11	86.005	42.95	-1.00176	3.49e-05	0.000696731
Kcnb2	13	21.61	22	37.02	13	22.76	4	6.5	29.315	14.63	-1.00271	0.0176058	0.0877508
Lmbr1	23	38.24	13	21.88	6	10.51	12	19.49	30.06	15	-1.00288	0.0199167	0.0955635
Cnr1	19	31.59	49	82.46	13	22.76	21	34.11	57.025	28.435	-1.00393	0.00100114	0.0106053
Peg3	104	172.92	176	296.19	47	82.3	93	151.04	234.555	116.67	-1.00749	1.3e-11	8.7e-10
Gbe1	16	26.6	19	31.97	12	21.01	5	8.12	29.285	14.565	-1.00766	0.0176058	0.0877508
Fam53c	31	51.54	26	43.76	15	26.26	13	21.11	47.65	23.685	-1.0085	0.0022185	0.0196502
Mpp4	23	38.24	32	53.85	15	26.26	12	19.49	46.045	22.875	-1.00927	0.00266897	0.0224661
Sema3c	8	13.3	22	37.02	5	8.75	10	16.24	25.16	12.495	-1.00978	0.0358008	0.140671
Fbxo32	46	76.48	38	63.95	12	21.01	30	48.72	70.215	34.865	-1.01	0.000235176	0.00331233
Mrps31	31	51.54	16	26.93	12	21.01	11	17.86	39.235	19.435	-1.01348	0.00562376	0.0385982
Arpp21	323	537.04	133	223.82	153	267.9	67	108.81	380.43	188.355	-1.01418	8.44e-19	9.81e-17
Steap2	8	13.3	20	33.66	4	7	10	16.24	23.48	11.62	-1.01482	0.0436679	0.160132
Cpne5	29	48.22	35	58.9	21	36.77	10	16.24	53.56	26.505	-1.01489	0.0009375	0.0100375
Pld5	33	54.87	9	15.15	4	7	17	27.61	35.01	17.305	-1.01658	0.0112044	0.0645164
Mtf2	27	44.89	24	40.39	12	21.01	13	21.11	42.64	21.06	-1.0177	0.00386938	0.0293802
Sulf1	67	111.4	9	15.15	19	33.27	18	29.23	63.275	31.25	-1.01778	0.000315621	0.00424394
Slc7a14	22	36.58	55	92.56	16	28.02	22	35.73	64.57	31.875	-1.01844	0.000357829	0.00470827
Nop56	15	24.94	18	30.29	10	17.51	6	9.74	27.615	13.625	-1.0192	0.0213727	0.0997512
Clip2	21	34.92	24	40.39	11	19.26	11	17.86	37.655	18.56	-1.02064	0.00678702	0.0447103
Dmpk	22	36.58	5	8.41	8	14.01	5	8.12	22.495	11.065	-1.0236	0.0385734	0.14844
Nxpe4	21	34.92	6	10.1	8	14.01	5	8.12	22.51	11.065	-1.02456	0.0385734	0.14844
Ppp1r7	89	147.98	57	95.92	35	61.28	36	58.47	121.95	59.875	-1.02626	5.7e-07	1.93e-05
Foxp2	61	101.42	28	47.12	24	42.02	19	30.86	74.27	36.44	-1.02726	7.9e-05	0.00136454
Ogfod3	15	24.94	12	20.19	8	14.01	5	8.12	22.565	11.065	-1.02808	0.0385734	0.14844
Slc6a11	21	34.92	57	95.92	19	33.27	19	30.86	65.42	32.065	-1.02873	0.000263544	0.00364514
Orc6	22	36.58	18	30.29	15	26.26	4	6.5	33.435	16.38	-1.02942	0.00869005	0.0535761
Sntg1	30	49.88	20	33.66	15	26.26	9	14.62	41.77	20.44	-1.03107	0.00340131	0.0268666
Lingo3	35	58.19	13	21.88	14	24.51	9	14.62	40.035	19.565	-1.03299	0.00409751	0.0306013
Asphd1	13	21.61	20	33.66	8	14.01	8	12.99	27.635	13.5	-1.03354	0.0213727	0.0997512
Fkbp1b	15	24.94	22	37.02	8	14.01	10	16.24	30.98	15.125	-1.0344	0.0145205	0.0764638
Hace1	32	53.21	22	37.02	14	24.51	12	19.49	45.115	22	-1.0361	0.00234779	0.0205226
Kbtbd11	68	113.06	41	69	34	59.53	18	29.23	91.03	44.38	-1.03643	1.34e-05	0.000305086
Ewsr1	104	172.92	102	171.65	56	98.06	43	69.83	172.285	83.945	-1.03728	2.08e-09	1.04e-07
Bmt2	30	49.88	19	31.97	7	12.26	17	27.61	40.925	19.935	-1.03768	0.00466325	0.0336211
Gm49333	13	21.61	30	50.49	8	14.01	13	21.11	36.05	17.56	-1.03771	0.00819729	0.0512651
Snapc4	15	24.94	16	26.93	7	12.26	8	12.99	25.935	12.625	-1.03862	0.0259807	0.114251
Igfbp4	44	73.16	9	15.15	18	31.52	7	11.37	44.155	21.445	-1.04194	0.00205142	0.0184979
Fancc	16	26.6	11	18.51	6	10.51	7	11.37	22.555	10.94	-1.04383	0.0385734	0.14844
Crebrf	65	108.07	66	111.07	29	50.78	34	55.22	109.57	53	-1.04779	1.26e-06	3.75e-05
Rad17	10	16.63	17	28.61	6	10.51	7	11.37	22.62	10.94	-1.04799	0.0385734	0.14844
Mrpl3	34	56.53	38	63.95	11	19.26	24	38.98	60.24	29.12	-1.04871	0.000453091	0.00570282
Plppr4	133	221.13	70	117.8	62	108.56	34	55.22	169.465	81.89	-1.04923	1.41e-09	7.4e-08
Rfx4	28	46.55	20	33.66	11	19.26	12	19.49	40.105	19.375	-1.04959	0.00409751	0.0306013
Dhdh	12	19.95	20	33.66	12	21.01	3	4.87	26.805	12.94	-1.05066	0.0186922	0.0916287
mt-Ti	157	261.04	215	361.82	88	154.09	90	146.16	311.43	150.125	-1.05274	2.99e-16	2.95e-14
Fam229b	15	24.94	12	20.19	5	8.75	8	12.99	22.565	10.87	-1.05373	0.0385734	0.14844
Larp1	48	79.81	49	82.46	27	47.28	19	30.86	81.135	39.07	-1.05426	2.49e-05	0.000521619
Nos1	21	34.92	24	40.39	4	7	18	29.23	37.655	18.115	-1.05566	0.00678702	0.0447103
Kdm3b	27	44.89	5	8.41	10	17.51	5	8.12	26.65	12.815	-1.0563	0.0186922	0.0916287
Isg20l2	10	16.63	21	35.34	5	8.75	10	16.24	25.985	12.495	-1.05633	0.0259807	0.114251
Sh3bp5l	19	31.59	27	45.44	10	17.51	12	19.49	38.515	18.5	-1.0579	0.00493939	0.0352059
Cntn4	46	76.48	45	75.73	13	22.76	31	50.35	76.105	36.555	-1.05792	6.61e-05	0.00118655
Ddx25	19	31.59	38	63.95	16	28.02	11	17.86	47.77	22.94	-1.05824	0.0014206	0.0140099
Ireb2	30	49.88	29	48.8	15	26.26	13	21.11	49.34	23.685	-1.05878	0.00118295	0.0122696
Slc25a27	17	28.27	36	60.58	16	28.02	9	14.62	44.425	21.32	-1.05916	0.00205142	0.0184979
Cacng3	41	68.17	25	42.07	20	35.02	11	17.86	55.12	26.44	-1.05985	0.000497808	0.00614577
Gemin5	5	8.31	22	37.02	5	8.75	8	12.99	22.665	10.87	-1.06011	0.0385734	0.14844
Acly	54	89.78	192	323.11	49	85.8	69	112.06	206.445	98.93	-1.06128	2.14e-11	1.4e-09
Ccdc34	50	83.13	42	70.68	17	29.77	27	43.85	76.905	36.81	-1.06298	4.85e-05	0.00090458
Nme5	11	18.29	19	31.97	10	17.51	4	6.5	25.13	12.005	-1.06578	0.0227024	0.103903
Armc8	60	99.76	34	57.22	15	26.26	30	48.72	78.49	37.49	-1.066	4.06e-05	0.000780659
2810013P06Rik	10	16.63	20	33.66	10	17.51	4	6.5	25.145	12.005	-1.06664	0.0227024	0.103903
Bcl11b	118	196.19	47	79.1	50	87.55	27	43.85	137.645	65.7	-1.06699	3.7e-08	1.57e-06
Pts	28	46.55	44	74.05	18	31.52	16	25.98	60.3	28.75	-1.0686	0.000289768	0.00395724
Ccdc92	37	61.52	34	57.22	11	19.26	23	37.35	59.37	28.305	-1.06868	0.000397526	0.00511617
Kirrel3	74	123.04	71	119.49	28	49.03	41	66.59	121.265	57.81	-1.06877	3.25e-07	1.16e-05
Med12l	30	49.88	17	28.61	13	22.76	9	14.62	39.245	18.69	-1.07024	0.003573	0.027937
Fam43b	28	46.55	12	20.19	7	12.26	12	19.49	33.37	15.875	-1.0718	0.00869005	0.0535761
Ppp1r1b	257	427.3	119	200.26	111	194.36	64	103.94	313.78	149.15	-1.07299	5.09e-17	5.47e-15
Esf1	43	71.49	36	60.58	21	36.77	16	25.98	66.035	31.375	-1.07362	0.000123053	0.00192873
Scaf4	19	31.59	15	25.24	8	14.01	8	12.99	28.415	13.5	-1.07369	0.0154099	0.0798028
Fopnl	50	83.13	57	95.92	30	52.53	20	32.48	89.525	42.505	-1.07466	6.55e-06	0.000165793
Slc17a6	20	33.25	20	33.66	7	12.26	12	19.49	33.455	15.875	-1.07547	0.00869005	0.0535761
Synpr	99	164.6	48	80.78	34	59.53	35	56.84	122.69	58.185	-1.0763	1.75e-07	6.69e-06
Spint2	52	86.46	19	31.97	20	35.02	13	21.11	59.215	28.065	-1.07719	0.000251661	0.00350504
Efnb2	20	33.25	8	13.46	8	14.01	5	8.12	23.355	11.065	-1.07773	0.0276117	0.119222
Pgap1	23	38.24	22	37.02	12	21.01	9	14.62	37.63	17.815	-1.07879	0.0043037	0.0318086
Kcnh1	22	36.58	10	16.83	7	12.26	8	12.99	26.705	12.625	-1.08083	0.0186922	0.0916287
Ccser1	23	38.24	36	60.58	22	38.52	5	8.12	49.41	23.32	-1.08324	0.00118295	0.0122696
Bicral	28	46.55	32	53.85	15	26.26	13	21.11	50.2	23.685	-1.08371	0.000857529	0.00949645
Clasrp	50	83.13	50	84.14	19	33.27	28	45.47	83.635	39.37	-1.08701	1.52e-05	0.000342863
Frmpd4	51	84.8	31	52.17	21	36.77	17	27.61	68.485	32.19	-1.08918	7.47e-05	0.00130394
Caln1	109	181.23	86	144.73	67	117.32	22	35.73	162.98	76.525	-1.09069	7.32e-10	4.04e-08
Lrrk2	37	61.52	6	10.1	8	14.01	12	19.49	35.81	16.75	-1.0962	0.00518705	0.0364771
Eps15l1	26	43.23	26	43.76	13	22.76	11	17.86	43.495	20.31	-1.09866	0.00177943	0.0165665
Gnai1	94	156.29	105	176.7	33	57.78	60	97.44	166.495	77.61	-1.10116	8.2e-10	4.43e-08
Robo1	56	93.11	44	74.05	25	43.77	21	34.11	83.58	38.94	-1.1019	9.58e-06	0.000228138
Clpb	32	53.21	36	60.58	20	35.02	11	17.86	56.895	26.44	-1.10558	0.000259793	0.00360323
Slc7a11	30	49.88	10	16.83	13	22.76	5	8.12	33.355	15.44	-1.11123	0.0053877	0.0374927
Bcl7a	25	41.57	27	45.44	10	17.51	14	22.74	43.505	20.125	-1.11219	0.00177943	0.0165665
Pdf	19	31.59	9	15.15	4	7	9	14.62	23.37	10.81	-1.11229	0.0276117	0.119222
Fbxl4	18	29.93	14	23.56	3	5.25	12	19.49	26.745	12.37	-1.11242	0.0186922	0.0916287
Hint3	35	58.19	38	63.95	10	17.51	24	38.98	61.07	28.245	-1.11247	0.000210375	0.0030142
Cavin2	19	31.59	5	8.41	5	8.75	6	9.74	20	9.245	-1.11325	0.041047	0.154779
Ano8	15	24.94	22	37.02	8	14.01	9	14.62	30.98	14.315	-1.11381	0.0091194	0.0557762
Sprtn	21	34.92	9	15.15	3	5.25	11	17.86	25.035	11.555	-1.11543	0.0227024	0.103903
Pnck	38	63.18	41	69	20	35.02	16	25.98	66.09	30.5	-1.11562	7.69e-05	0.00133569
Slc6a15	18	29.93	21	35.34	7	12.26	11	17.86	32.635	15.06	-1.1157	0.00755023	0.0482472
C130074G19Rik	17	28.27	14	23.56	9	15.76	5	8.12	25.915	11.94	-1.11798	0.0161532	0.0821749
Gm20671	16	26.6	15	25.24	9	15.76	5	8.12	25.92	11.94	-1.11826	0.0161532	0.0821749
Agpat1	32	53.21	39	65.63	21	36.77	11	17.86	59.42	27.315	-1.12126	0.000156198	0.00234884
Eci1	46	76.48	27	45.44	19	33.27	14	22.74	60.96	28.005	-1.12218	0.000130831	0.00201589
Abhd10	21	34.92	14	23.56	6	10.51	10	16.24	29.24	13.375	-1.1284	0.0110238	0.0639061
Btbd6	24	39.9	14	23.56	11	19.26	6	9.74	31.73	14.5	-1.12979	0.00649185	0.0432501
Ring1	14	23.28	15	25.24	8	14.01	5	8.12	24.26	11.065	-1.13258	0.0195836	0.0942426
Hlf	57	94.77	34	57.22	19	33.27	22	35.73	75.995	34.5	-1.13931	1.66e-05	0.000365778
Sorbs1	60	99.76	104	175.02	48	84.05	25	40.6	137.39	62.325	-1.14039	5.85e-09	2.75e-07
Nbdy	56	93.11	59	99.29	34	59.53	17	27.61	96.2	43.57	-1.1427	1.28e-06	3.79e-05
Rbm27	56	93.11	18	30.29	18	31.52	15	24.36	61.7	27.94	-1.14294	9.38e-05	0.00156046
Rragd	34	56.53	24	40.39	13	22.76	13	21.11	48.46	21.935	-1.14356	0.000636108	0.00751901
Flii	23	38.24	18	30.29	14	24.51	4	6.5	34.265	15.505	-1.144	0.00381908	0.0291533
Ssbp1	27	44.89	6	10.1	4	7	11	17.86	27.495	12.43	-1.14534	0.0133378	0.0727252
Ksr1	25	41.57	20	33.66	12	21.01	8	12.99	37.615	17	-1.14577	0.00264717	0.0223578
Gabra4	44	73.16	19	31.97	16	28.02	12	19.49	52.565	23.755	-1.14587	0.000317703	0.00424737
Patz1	36	59.86	37	62.27	12	21.01	21	34.11	61.065	27.56	-1.14777	0.000130831	0.00201589
Lrrc75b	11	18.29	13	21.88	2	3.5	9	14.62	20.085	9.06	-1.14854	0.041047	0.154779
Abcb6	13	21.61	16	26.93	6	10.51	7	11.37	24.27	10.94	-1.14956	0.0195836	0.0942426
Gstk1	9	14.96	15	25.24	2	3.5	9	14.62	20.1	9.06	-1.14961	0.041047	0.154779
Senp5	47	78.14	36	60.58	19	33.27	18	29.23	69.36	31.25	-1.15025	3.33e-05	0.000672848
Kcnt1	25	41.57	29	48.8	13	22.76	11	17.86	45.185	20.31	-1.15365	0.000911284	0.00989914
Arl5b	14	23.28	9	15.15	8	14.01	2	3.25	19.215	8.63	-1.1548	0.0351564	0.139863
Htr1b	27	44.89	1	1.68	11	19.26	1	1.62	23.285	10.44	-1.15728	0.0166424	0.0840525
Cep89	30	49.88	6	10.1	7	12.26	9	14.62	29.99	13.44	-1.15795	0.00782684	0.0495997
Grin2b	143	237.76	79	132.95	67	117.32	30	48.72	185.355	83.02	-1.15876	5.58e-12	3.85e-10
Ripor2	8	13.3	15	25.24	8	14.01	2	3.25	19.27	8.63	-1.15892	0.0351564	0.139863
B630019K06Rik	20	33.25	34	57.22	12	21.01	12	19.49	45.235	20.25	-1.15952	0.000911284	0.00989914
Gm40578	19	31.59	11	18.51	10	17.51	3	4.87	25.05	11.19	-1.1626	0.0137681	0.0739427
Sgk3	37	61.52	24	40.39	13	22.76	14	22.74	50.955	22.75	-1.16336	0.000379507	0.00493508
Nexmif	15	24.94	14	23.56	4	7	9	14.62	24.25	10.81	-1.16562	0.0195836	0.0942426
Chd5	25	41.57	49	82.46	13	22.76	20	32.48	62.015	27.62	-1.1669	9.38e-05	0.00156046
Drd2	32	53.21	17	28.61	18	31.52	3	4.87	40.91	18.195	-1.16891	0.00110408	0.0115975
Enox2	21	34.92	13	21.88	7	12.26	8	12.99	28.4	12.625	-1.16961	0.00944211	0.0572873
Dcaf12l1	40	66.51	27	45.44	21	36.77	8	12.99	55.975	24.88	-1.1698	0.000134644	0.00206401
Slc35g2	8	13.3	23	38.71	3	5.25	11	17.86	26.005	11.555	-1.17027	0.0161532	0.0821749
Abca8b	8	13.3	13	21.88	8	14.01	1	1.62	17.59	7.815	-1.17044	0.0428509	0.158884
Reln	28	46.55	13	21.88	9	15.76	9	14.62	34.215	15.19	-1.17151	0.00381908	0.0291533
Larp7	16	26.6	16	26.93	8	14.01	6	9.74	26.765	11.875	-1.17242	0.011398	0.0650357
Flrt3	35	58.19	19	31.97	8	14.01	16	25.98	45.08	19.995	-1.17285	0.000911284	0.00989914
Gm4258	21	34.92	16	26.93	11	19.26	5	8.12	30.925	13.69	-1.17565	0.00551688	0.0381263
Inpp4a	44	73.16	55	92.56	15	26.26	29	47.1	82.86	36.68	-1.17568	5.08e-06	0.000133587
Cfap54	20	33.25	12	20.19	7	12.26	7	11.37	26.72	11.815	-1.1773	0.011398	0.0650357
Rnf182	14	23.28	25	42.07	10	17.51	7	11.37	32.675	14.44	-1.17812	0.00458943	0.0332808
Nfrkb	16	26.6	16	26.93	7	12.26	7	11.37	26.765	11.815	-1.17973	0.011398	0.0650357
Rbm41	16	26.6	14	23.56	8	14.01	5	8.12	25.08	11.065	-1.18053	0.0137681	0.0739427
Nt5dc1	24	39.9	11	18.51	11	19.26	4	6.5	29.205	12.88	-1.18108	0.00663373	0.0439652
Sipa1l3	28	46.55	13	21.88	7	12.26	11	17.86	34.215	15.06	-1.18391	0.00381908	0.0291533
St5	15	24.94	27	45.44	13	22.76	5	8.12	35.19	15.44	-1.18849	0.00268986	0.022547
Arhgap10	14	23.28	7	11.78	6	10.51	3	4.87	17.53	7.69	-1.18877	0.0428509	0.158884
Actr6	18	29.93	21	35.34	8	14.01	9	14.62	32.635	14.315	-1.18889	0.00458943	0.0332808
Dtx2	13	21.61	8	13.46	6	10.51	3	4.87	17.535	7.69	-1.18918	0.0428509	0.158884
Sgcb	41	68.17	41	69	13	22.76	23	37.35	68.585	30.055	-1.19029	2.83e-05	0.00058047
Agt	38	63.18	144	242.34	29	50.78	51	82.83	152.76	66.805	-1.19324	2.99e-10	1.73e-08
Epg5	18	29.93	16	26.93	4	7	11	17.86	28.43	12.43	-1.19359	0.00944211	0.0572873
Enpp2	1482	2464.06	600	1009.73	526	921.02	368	597.65	1736.89	759.335	-1.1937	5.86e-103	3.91e-100
D430041D05Rik	35	58.19	34	57.22	13	22.76	17	27.61	57.705	25.185	-1.19613	0.000113082	0.00180646
Acvr1b	30	49.88	25	42.07	9	15.76	15	24.36	45.975	20.06	-1.19653	0.00064718	0.00759601
Gpr83	53	88.12	27	45.44	24	42.02	10	16.24	66.78	29.13	-1.19691	3.37e-05	0.000677882
Dis3l	8	13.3	19	31.97	2	3.5	10	16.24	22.635	9.87	-1.19743	0.02377	0.107362
Cpne4	14	23.28	16	26.93	6	10.51	7	11.37	25.105	10.94	-1.19836	0.0137681	0.0739427
D3Ertd254e	17	28.27	17	28.61	3	5.25	12	19.49	28.44	12.37	-1.20108	0.00944211	0.0572873
Stard13	25	41.57	20	33.66	14	24.51	5	8.12	37.615	16.315	-1.20511	0.00157612	0.015025
Gng10	8	13.3	13	21.88	5	8.75	4	6.5	17.59	7.625	-1.20595	0.0428509	0.158884
Panx1	15	24.94	27	45.44	10	17.51	8	12.99	35.19	15.25	-1.20636	0.00268986	0.022547
Gm43552	16	26.6	12	20.19	6	10.51	6	9.74	23.395	10.125	-1.20828	0.0166424	0.0840525
Fbxo38	20	33.25	27	45.44	12	21.01	8	12.99	39.345	17	-1.21065	0.0013192	0.013192
Stk16	36	59.86	29	48.8	11	19.26	17	27.61	54.33	23.435	-1.21308	0.000160305	0.00239978
Polr3gl	22	36.58	15	25.24	5	8.75	11	17.86	30.91	13.305	-1.21611	0.00551688	0.0381263
Pou2f2	23	38.24	20	33.66	13	22.76	5	8.12	35.95	15.44	-1.21932	0.00188282	0.0172762
Fam135a	21	34.92	13	21.88	13	22.76	1	1.62	28.4	12.19	-1.22019	0.00554291	0.0381914
Adcy6	14	23.28	16	26.93	3	5.25	10	16.24	25.105	10.745	-1.22431	0.0137681	0.0739427
Sntb2	17	28.27	7	11.78	7	12.26	3	4.87	20.025	8.565	-1.22528	0.0243661	0.108923
Actl6b	21	34.92	17	28.61	9	15.76	7	11.37	31.765	13.565	-1.22755	0.00386167	0.029344
Gpr158	61	101.42	45	75.73	20	35.02	25	40.6	88.575	37.81	-1.22813	7.85e-07	2.53e-05
Syndig1l	23	38.24	6	10.1	9	15.76	3	4.87	24.17	10.315	-1.22847	0.0115495	0.0656594
Dcc	59	98.1	21	35.34	26	45.53	7	11.37	66.72	28.45	-1.22969	2.01e-05	0.000432764
Armcx5	22	36.58	21	35.34	11	19.26	7	11.37	35.96	15.315	-1.23145	0.00188282	0.0172762
G2e3	22	36.58	21	35.34	10	17.51	8	12.99	35.96	15.25	-1.23758	0.00188282	0.0172762
Scn2a	71	118.05	63	106.02	31	54.28	25	40.6	112.035	47.44	-1.23977	1.59e-08	7.02e-07
Dpm1	21	34.92	34	57.22	13	22.76	10	16.24	46.07	19.5	-1.24035	0.00038268	0.00496987
Atp11b	28	46.55	22	37.02	10	17.51	11	17.86	41.785	17.685	-1.24046	0.000774907	0.00876592
A330069E16Rik	18	29.93	16	26.93	10	17.51	4	6.5	28.43	12.005	-1.24378	0.00554291	0.0381914
Axin1	23	38.24	22	37.02	7	12.26	12	19.49	37.63	15.875	-1.24513	0.00157612	0.015025
Pomc	11	18.29	11	18.51	7	12.26	2	3.25	18.4	7.755	-1.24651	0.0295114	0.124468
Igsf1	12	19.95	19	31.97	6	10.51	7	11.37	25.96	10.94	-1.24668	0.0095988	0.0578399
Kank3	10	16.63	12	20.19	7	12.26	2	3.25	18.41	7.755	-1.24729	0.0295114	0.124468
Acer2	13	21.61	11	18.51	5	8.75	5	8.12	20.06	8.435	-1.24986	0.0243661	0.108923
Fzd1	14	23.28	7	11.78	1	1.75	8	12.99	17.53	7.37	-1.25009	0.0428509	0.158884
Cab39l	44	73.16	26	43.76	15	26.26	14	22.74	58.46	24.5	-1.25467	4.7e-05	0.000884277
Gm28047	12	19.95	10	16.83	6	10.51	3	4.87	18.39	7.69	-1.25787	0.0295114	0.124468
Mief1	23	38.24	14	23.56	11	19.26	4	6.5	30.9	12.88	-1.26247	0.00320462	0.0258854
Ggct	22	36.58	43	72.36	12	21.01	15	24.36	54.47	22.685	-1.26372	9.43e-05	0.00156402
Cap2	63	104.75	73	122.85	29	50.78	27	43.85	113.8	47.315	-1.26613	7.88e-09	3.61e-07
A830018L16Rik	43	71.49	18	30.29	13	22.76	12	19.49	50.89	21.125	-1.26843	0.000132515	0.00203869
Slc29a4	16	26.6	8	13.46	3	5.25	7	11.37	20.03	8.31	-1.26924	0.0243661	0.108923
Dsel	10	16.63	10	16.83	7	12.26	1	1.62	16.73	6.94	-1.26943	0.0357618	0.140671
Filip1	18	29.93	4	6.73	4	7	5	8.12	18.33	7.56	-1.27775	0.0295114	0.124468
Klf15	26	43.23	28	47.12	12	21.01	10	16.24	45.175	18.625	-1.27828	0.000317022	0.00424394
Kcnab1	73	121.37	51	85.83	33	57.78	17	27.61	103.6	42.695	-1.27888	3.59e-08	1.53e-06
Sgcz	132	219.47	40	67.32	33	57.78	37	60.09	143.395	58.935	-1.2828	7.08e-11	4.32e-09
Gpc5	40	66.51	54	90.88	23	40.27	15	24.36	78.695	32.315	-1.28407	1.23e-06	3.7e-05
Epb41l5	16	26.6	11	18.51	5	8.75	6	9.74	22.555	9.245	-1.2867	0.0138973	0.0741586
Kcnk9	13	21.61	12	20.19	7	12.26	3	4.87	20.9	8.565	-1.28698	0.0167206	0.0843198
Ino80b	25	41.57	19	31.97	7	12.26	11	17.86	36.77	15.06	-1.28781	0.00131006	0.0131661
Bicdl1	24	39.9	30	50.49	10	17.51	12	19.49	45.195	18.5	-1.28864	0.000317022	0.00424394
Hes5	17	28.27	13	21.88	8	14.01	4	6.5	25.075	10.255	-1.28992	0.00794799	0.0501767
Deptor	36	59.86	38	63.95	14	24.51	16	25.98	61.905	25.245	-1.29406	1.94e-05	0.000419792
Mettl3	15	24.94	12	20.19	4	7	7	11.37	22.565	9.185	-1.29674	0.0138973	0.0741586
Cacng5	8	13.3	14	23.56	3	5.25	6	9.74	18.43	7.495	-1.29806	0.0295114	0.124468
Cog7	35	58.19	27	45.44	12	21.01	13	21.11	51.815	21.06	-1.29886	9.22e-05	0.00154139
Atg10	24	39.9	8	13.46	4	7	9	14.62	26.68	10.81	-1.30339	0.00663874	0.0439652
Grb10	34	56.53	24	40.39	15	26.26	8	12.99	48.46	19.625	-1.3041	0.000128567	0.00199329
Col1a2	20	33.25	5	8.41	5	8.75	5	8.12	20.83	8.435	-1.3042	0.0167206	0.0843198
Mapk4	52	86.46	36	60.58	21	36.77	14	22.74	73.52	29.755	-1.305	2e-06	5.76e-05
Pde10a	182	302.6	86	144.73	68	119.07	38	61.71	223.665	90.39	-1.3071	9.18e-17	9.4e-15
Rab3b	15	24.94	62	104.34	15	26.26	16	25.98	64.64	26.12	-1.30727	1.15e-05	0.000266957
Man2c1	18	29.93	12	20.19	6	10.51	6	9.74	25.06	10.125	-1.30746	0.00794799	0.0501767
Slc25a18	15	24.94	34	57.22	5	8.75	15	24.36	41.08	16.555	-1.31117	0.000642916	0.00757263
Nubpl	9	14.96	9	15.15	6	10.51	1	1.62	15.055	6.065	-1.31166	0.0433497	0.159433
Pqlc2	9	14.96	21	35.34	6	10.51	6	9.74	25.15	10.125	-1.31264	0.00794799	0.0501767
Arl4d	22	36.58	11	18.51	8	14.01	5	8.12	27.545	11.065	-1.31579	0.00455656	0.0332111
Kcns2	18	29.93	2	3.37	3	5.25	5	8.12	16.65	6.685	-1.31652	0.0357618	0.140671
Epha6	40	66.51	36	60.58	17	29.77	13	21.11	63.545	25.44	-1.32068	9.35e-06	0.000223607
Ciart	12	19.95	8	13.46	3	5.25	5	8.12	16.705	6.685	-1.32128	0.0357618	0.140671
Mcu	33	54.87	15	25.24	9	15.76	10	16.24	40.055	16	-1.32391	0.000527132	0.00645204
Stx1a	51	84.8	52	87.51	16	28.02	25	40.6	86.155	34.31	-1.32831	2.57e-07	9.37e-06
Gm37988	14	23.28	16	26.93	4	7	8	12.99	25.105	9.995	-1.3287	0.00794799	0.0501767
Garem1	15	24.94	8	13.46	5	8.75	4	6.5	19.2	7.625	-1.3323	0.0201104	0.0958553
Pik3c2b	50	83.13	47	79.1	21	36.77	17	27.61	81.115	32.19	-1.33336	4.13e-07	1.45e-05
Rabl2	21	34.92	7	11.78	5	8.75	6	9.74	23.35	9.245	-1.33668	0.00950948	0.0574591
Prkd1	24	39.9	15	25.24	11	19.26	4	6.5	32.57	12.88	-1.33841	0.00150706	0.0146744
1810030O07Rik	17	28.27	11	18.51	5	8.75	6	9.74	23.39	9.245	-1.33915	0.00950948	0.0574591
Fgf14	126	209.49	109	183.43	46	80.55	46	74.71	196.46	77.63	-1.33955	4.66e-15	4.02e-13
Abi3	10	16.63	8	13.46	4	7	3	4.87	15.045	5.935	-1.34196	0.0433497	0.159433
Ezh2	20	33.25	13	21.88	5	8.75	8	12.99	27.565	10.87	-1.34249	0.00455656	0.0332111
Lgr4	20	33.25	10	16.83	2	3.5	10	16.24	25.04	9.87	-1.34311	0.00794799	0.0501767
Ccdc148	20	33.25	14	23.56	10	17.51	3	4.87	28.405	11.19	-1.34393	0.0031047	0.0252899
Stk35	15	24.94	8	13.46	4	7	5	8.12	19.2	7.56	-1.34465	0.0201104	0.0958553
Slitrk1	13	21.61	28	47.12	8	14.01	8	12.99	34.365	13.5	-1.34798	0.00127347	0.0128894
Ppih	21	34.92	12	20.19	4	7	9	14.62	27.555	10.81	-1.34995	0.00455656	0.0332111
Folh1	9	14.96	29	48.8	5	8.75	10	16.24	31.88	12.495	-1.3513	0.00220472	0.0195801
Nr3c2	37	61.52	19	31.97	7	12.26	15	24.36	46.745	18.31	-1.35218	0.000151659	0.00229787
Myh7	40	66.51	15	25.24	14	24.51	7	11.37	45.875	17.94	-1.35453	0.000122384	0.00192126
Cbx7	25	41.57	15	25.24	12	21.01	3	4.87	33.405	12.94	-1.36823	0.00102379	0.0108338
B3galnt2	12	19.95	16	26.93	2	3.5	9	14.62	23.44	9.06	-1.37139	0.00950948	0.0574591
Prr36	11	18.29	13	21.88	7	12.26	2	3.25	20.085	7.755	-1.37292	0.0135687	0.0732257
Lipe	20	33.25	12	20.19	9	15.76	3	4.87	26.72	10.315	-1.37318	0.00367602	0.0284082
Mecom	16	26.6	5	8.41	4	7	4	6.5	17.505	6.75	-1.37481	0.0241699	0.108586
Slit2	15	24.94	9	15.15	6	10.51	3	4.87	20.045	7.69	-1.38219	0.0135687	0.0732257
Cdh22	19	31.59	26	43.76	10	17.51	7	11.37	37.675	14.44	-1.38354	0.00050198	0.00616683
Fahd1	27	44.89	15	25.24	6	10.51	10	16.24	35.065	13.375	-1.39049	0.000869085	0.00959255
Acad8	29	48.22	8	13.46	6	10.51	8	12.99	30.84	11.75	-1.39214	0.0017809	0.0165665
Slc6a20a	13	21.61	11	18.51	5	8.75	4	6.5	20.06	7.625	-1.39551	0.0135687	0.0732257
Lss	18	29.93	9	15.15	7	12.26	3	4.87	22.54	8.565	-1.39596	0.00765947	0.0487865
Cars2	14	23.28	20	33.66	4	7	9	14.62	28.47	10.81	-1.39708	0.0031047	0.0252899
Lrrc73	36	59.86	28	47.12	13	22.76	11	17.86	53.49	20.31	-1.39708	2.42e-05	0.000509587
Cep97	44	73.16	25	42.07	12	21.01	14	22.74	57.615	21.875	-1.39716	1.21e-05	0.000279547
Fam126b	68	113.06	74	124.53	18	31.52	36	58.47	118.795	44.995	-1.40064	2.85e-10	1.66e-08
Lsm11	10	16.63	16	26.93	2	3.5	8	12.99	21.78	8.245	-1.40141	0.0113671	0.0650357
Cep126	24	39.9	5	8.41	3	5.25	8	12.99	24.155	9.12	-1.40522	0.00645252	0.043046
Cpne9	7	11.64	22	37.02	4	7	7	11.37	24.33	9.185	-1.40538	0.00645252	0.043046
Plekha8	8	13.3	11	18.51	5	8.75	2	3.25	15.905	6	-1.40645	0.0290105	0.123269
Cyb561d2	5	8.31	24	40.39	4	7	7	11.37	24.35	9.185	-1.40657	0.00645252	0.043046
Gtf2ird1	24	39.9	10	16.83	2	3.5	11	17.86	28.365	10.68	-1.4092	0.0031047	0.0252899
Syt17	13	21.61	22	37.02	7	12.26	6	9.74	29.315	11	-1.41414	0.00210072	0.01879
Nadk2	11	18.29	44	74.05	17	29.77	3	4.87	46.17	17.32	-1.41452	6.59e-05	0.00118655
Hdac8	49	81.47	33	55.54	21	36.77	9	14.62	68.505	25.695	-1.41472	9.64e-07	3e-05
Rtn2	24	39.9	46	77.41	14	24.51	12	19.49	58.655	22	-1.41475	8.25e-06	0.000200643
Nwd1	45	74.82	30	50.49	12	21.01	16	25.98	62.655	23.495	-1.41508	4.14e-06	0.00011041
Bop1	23	38.24	28	47.12	9	15.76	10	16.24	42.68	16	-1.41549	0.000168177	0.00249892
Adarb2	19	31.59	66	111.07	24	42.02	7	11.37	71.33	26.695	-1.41794	1.05e-06	3.24e-05
Ankrd26	22	36.58	16	26.93	8	14.01	6	9.74	31.755	11.875	-1.41906	0.00120372	0.0124352
Sh3rf3	11	18.29	8	13.46	4	7	3	4.87	15.875	5.935	-1.41944	0.0290105	0.123269
Gcat	20	33.25	26	43.76	9	15.76	8	12.99	38.505	14.375	-1.42148	0.000340259	0.00450674
Nnat	155	257.71	463	779.18	91	159.34	140	227.37	518.445	193.355	-1.42294	1.55e-40	4.07e-38
Gm26551	38	63.18	38	63.95	15	26.26	13	21.11	63.565	23.685	-1.42426	2.82e-06	7.88e-05
Penk	563	936.08	198	333.21	206	360.7	69	112.06	634.645	236.38	-1.42484	4.63e-50	1.6e-47
Dusp18	21	34.92	3	5.05	2	3.5	7	11.37	19.985	7.435	-1.42651	0.0135687	0.0732257
Pcgf5	35	58.19	21	35.34	5	8.75	16	25.98	46.765	17.365	-1.42925	8.34e-05	0.0014188
Adck5	11	18.29	8	13.46	3	5.25	4	6.5	15.875	5.875	-1.4341	0.0290105	0.123269
Pla2g4e	7	11.64	18	30.29	7	12.26	2	3.25	20.965	7.755	-1.43478	0.00906983	0.0555749
Ndst4	8	13.3	21	35.34	1	1.75	10	16.24	24.32	8.995	-1.43495	0.00645252	0.043046
Scamp4	42	69.83	27	45.44	15	26.26	10	16.24	57.635	21.25	-1.43948	6.49e-06	0.000165022
Grik4	23	38.24	35	58.9	13	22.76	8	12.99	48.57	17.875	-1.44212	3.83e-05	0.000747319
Foxj1	24	39.9	15	25.24	9	15.76	5	8.12	32.57	11.94	-1.44774	0.000808593	0.00907511
L3mbtl3	15	24.94	13	21.88	7	12.26	3	4.87	23.41	8.565	-1.4506	0.00511813	0.0361195
Notch3	12	19.95	18	30.29	4	7	7	11.37	25.12	9.185	-1.45148	0.00434343	0.0320548
Magohb	14	23.28	13	21.88	2	3.5	8	12.99	22.58	8.245	-1.45345	0.00765947	0.0487865
Cxxc4	18	29.93	12	20.19	3	5.25	8	12.99	25.06	9.12	-1.45828	0.00434343	0.0320548
C1qtnf12	14	23.28	8	13.46	3	5.25	5	8.12	18.37	6.685	-1.45835	0.0161638	0.0821749
Atrip	24	39.9	21	35.34	11	19.26	5	8.12	37.62	13.69	-1.45838	0.00026706	0.00368358
Ruvbl2	12	19.95	16	26.93	6	10.51	4	6.5	23.44	8.505	-1.46259	0.00511813	0.0361195
Egfem1	30	49.88	3	5.05	3	5.25	9	14.62	27.465	9.935	-1.467	0.00247241	0.0212772
Fzd2	13	21.61	4	6.73	4	7	2	3.25	14.17	5.125	-1.46722	0.0347408	0.139048
Cln3	14	23.28	17	28.61	7	12.26	4	6.5	25.945	9.38	-1.4678	0.0029016	0.0240398
Insc	31	51.54	28	47.12	12	21.01	9	14.62	49.33	17.815	-1.46937	2.58e-05	0.000537585
Sars2	12	19.95	10	16.83	2	3.5	6	9.74	18.39	6.62	-1.47402	0.0161638	0.0821749
Pcdh11x	14	23.28	37	62.27	11	19.26	7	11.37	42.775	15.315	-1.48182	8.89e-05	0.00150141
Fam122a	16	26.6	17	28.61	2	3.5	10	16.24	27.605	9.87	-1.48381	0.00247241	0.0212772
Brwd3	13	21.61	15	25.24	4	7	6	9.74	23.425	8.37	-1.48475	0.00511813	0.0361195
Arl13b	10	16.63	16	26.93	7	12.26	2	3.25	21.78	7.755	-1.48981	0.00600951	0.0407701
Arhgap20	25	41.57	35	58.9	13	22.76	8	12.99	50.235	17.875	-1.49075	1.73e-05	0.000379335
B3gat2	14	23.28	15	25.24	8	14.01	2	3.25	24.26	8.63	-1.49115	0.00339296	0.0268218
Irf1	7	11.64	10	16.83	3	5.25	3	4.87	14.235	5.06	-1.49223	0.0347408	0.139048
Cep83	28	46.55	15	25.24	9	15.76	6	9.74	35.895	12.75	-1.49329	0.000309954	0.00419423
Cntln	32	53.21	15	25.24	2	3.5	15	24.36	39.225	13.93	-1.49358	0.000229441	0.00323612
Srek1ip1	33	54.87	47	79.1	16	28.02	12	19.49	66.985	23.755	-1.49561	5.84e-07	1.96e-05
Coro2a	6	9.98	14	23.56	4	7	3	4.87	16.77	5.935	-1.49856	0.019197	0.0931723
Rbm14	25	41.57	7	11.78	8	14.01	3	4.87	26.675	9.44	-1.49863	0.00192444	0.0175428
Slc25a13	19	31.59	21	35.34	7	12.26	7	11.37	33.465	11.815	-1.50203	0.000539952	0.00655282
Myrip	26	43.23	20	33.66	9	15.76	7	11.37	38.445	13.565	-1.50291	0.000178312	0.00262997
Ston2	22	36.58	12	20.19	4	7	8	12.99	28.385	9.995	-1.50585	0.00165138	0.0156381
Psme4	29	48.22	26	43.76	12	21.01	7	11.37	45.99	16.19	-1.50622	3.43e-05	0.000686345
Cacna1b	16	26.6	23	38.71	2	3.5	12	19.49	32.655	11.495	-1.5063	0.000808593	0.00907511
Kmt5c	9	14.96	14	23.56	4	7	4	6.5	19.26	6.75	-1.51265	0.0107034	0.0625955
Gm35188	22	36.58	4	6.73	4	7	5	8.12	21.655	7.56	-1.51824	0.00600951	0.0407701
Ispd	21	34.92	19	31.97	4	7	10	16.24	33.445	11.62	-1.52518	0.000539952	0.00655282
Ddx28	9	14.96	11	18.51	2	3.5	5	8.12	16.735	5.81	-1.52626	0.019197	0.0931723
Rmst	22	36.58	20	33.66	13	22.76	1	1.62	35.12	12.19	-1.52659	0.000236738	0.00332497
Mn1	20	33.25	9	15.15	4	7	6	9.74	24.2	8.37	-1.53171	0.00339296	0.0268218
Gm5124	10	16.63	17	28.61	8	14.01	1	1.62	22.62	7.815	-1.53328	0.00394891	0.0298933
Pms2	9	14.96	9	15.15	5	8.75	1	1.62	15.055	5.185	-1.53783	0.0226956	0.103903
Styx	10	16.63	5	8.41	4	7	1	1.62	12.52	4.31	-1.53847	0.0414394	0.15532
Pomgnt2	23	38.24	27	45.44	9	15.76	8	12.99	41.84	14.375	-1.54132	6.83e-05	0.00121744
Fstl5	3	4.99	26	43.76	4	7	6	9.74	24.375	8.37	-1.5421	0.00339296	0.0268218
Rab36	6	9.98	9	15.15	4	7	1	1.62	12.565	4.31	-1.54365	0.0414394	0.15532
Rpap1	17	28.27	19	31.97	8	14.01	4	6.5	30.12	10.255	-1.55439	0.000722406	0.00824257
Grrp1	10	16.63	5	8.41	3	5.25	2	3.25	12.52	4.25	-1.5587	0.0414394	0.15532
Chrm3	27	44.89	41	69	10	17.51	13	21.11	56.945	19.31	-1.56022	2.59e-06	7.31e-05
Sbsn	7	11.64	8	13.46	3	5.25	2	3.25	12.55	4.25	-1.56215	0.0414394	0.15532
Rnf150	35	58.19	10	16.83	7	12.26	8	12.99	37.51	12.625	-1.57099	0.000136026	0.0020799
Irak1bp1	37	61.52	20	33.66	9	15.76	10	16.24	47.59	16	-1.57259	1.51e-05	0.000341758
Setd4	22	36.58	5	8.41	4	7	5	8.12	22.495	7.56	-1.57315	0.00394891	0.0298933
Lingo2	96	159.62	52	87.51	27	47.28	22	35.73	123.565	41.505	-1.57391	1.61e-12	1.21e-10
Gstm4	12	19.95	9	15.15	3	5.25	4	6.5	17.55	5.875	-1.57881	0.0125711	0.0696974
Fam76b	10	16.63	11	18.51	3	5.25	4	6.5	17.57	5.875	-1.58045	0.0125711	0.0696974
Pde7b	79	131.35	16	26.93	19	33.27	12	19.49	79.14	26.38	-1.58496	1.01e-08	4.53e-07
Recql	4	6.65	11	18.51	2	3.5	3	4.87	12.58	4.185	-1.58783	0.0414394	0.15532
Alk	13	21.61	28	47.12	1	1.75	13	21.11	34.365	11.43	-1.58811	0.000358512	0.00471106
Bbs9	20	33.25	14	23.56	8	14.01	3	4.87	28.405	9.44	-1.58929	0.000829489	0.00923707
Gpr173	3	4.99	15	25.24	2	3.5	4	6.5	15.115	5	-1.59598	0.0226956	0.103903
Mturn	28	46.55	42	70.68	11	19.26	12	19.49	58.615	19.375	-1.59707	1.13e-06	3.47e-05
Elavl2	28	46.55	162	272.63	33	57.78	29	47.1	159.59	52.44	-1.60563	3.35e-16	3.22e-14
Ell	15	24.94	13	21.88	6	10.51	3	4.87	23.41	7.69	-1.60607	0.00257463	0.0219491
Sarm1	14	23.28	16	26.93	2	3.5	8	12.99	25.105	8.245	-1.60638	0.00223244	0.0197212
Ankrd34a	20	33.25	17	28.61	6	10.51	6	9.74	30.93	10.125	-1.61108	0.000473406	0.00591276
Gabpb1	11	18.29	10	16.83	1	1.75	6	9.74	17.56	5.745	-1.61191	0.0125711	0.0696974
Crnkl1	19	31.59	9	15.15	5	8.75	4	6.5	23.37	7.625	-1.61585	0.00257463	0.0219491
Cdkl3	14	23.28	5	8.41	4	7	2	3.25	15.845	5.125	-1.6284	0.0146634	0.0769732
Emp2	14	23.28	11	18.51	4	7	4	6.5	20.895	6.75	-1.6302	0.00456756	0.0332218
Gm10093	14	23.28	14	23.56	4	7	5	8.12	23.42	7.56	-1.63128	0.00257463	0.0219491
Ksr2	15	24.94	22	37.02	3	5.25	9	14.62	30.98	9.935	-1.64075	0.000473406	0.00591276
Rhbdd1	19	31.59	10	16.83	7	12.26	2	3.25	24.21	7.755	-1.6424	0.00166623	0.015734
Gm20754	11	18.29	8	13.46	3	5.25	3	4.87	15.875	5.06	-1.64955	0.0146634	0.0769732
Dok6	11	18.29	5	8.41	3	5.25	2	3.25	13.35	4.25	-1.6513	0.0266425	0.11614
Ranbp3l	12	19.95	1	1.68	3	5.25	1	1.62	10.815	3.435	-1.65465	0.049089	0.174756
Daxx	12	19.95	19	31.97	2	3.5	8	12.99	25.96	8.245	-1.6547	0.00145841	0.0142981
Flrt1	15	24.94	33	55.54	8	14.01	7	11.37	40.24	12.69	-1.66494	3.81e-05	0.000745935
Gm45495	9	14.96	7	11.78	2	3.5	3	4.87	13.37	4.185	-1.6757	0.0266425	0.11614
Dhx33	12	19.95	17	28.61	4	7	5	8.12	24.28	7.56	-1.68331	0.00166623	0.015734
4930473A02Rik	7	11.64	6	10.1	2	3.5	2	3.25	10.87	3.375	-1.68739	0.049089	0.174756
Cst6	7	11.64	6	10.1	2	3.5	2	3.25	10.87	3.375	-1.68739	0.049089	0.174756
Mmachc	16	26.6	16	26.93	3	5.25	7	11.37	26.765	8.31	-1.68743	0.000946306	0.0100885
Kcnt2	20	33.25	3	5.05	4	7	3	4.87	19.15	5.935	-1.69002	0.00523925	0.0366637
Eef1akmt2	24	39.9	24	40.39	4	7	11	17.86	40.145	12.43	-1.69139	3.81e-05	0.000745935
Gm48678	3	4.99	10	16.83	2	3.5	2	3.25	10.91	3.375	-1.69269	0.049089	0.174756
Shf	15	24.94	15	25.24	7	12.26	2	3.25	25.09	7.755	-1.69391	0.00107081	0.0112836
Kdsr	39	64.84	23	38.71	9	15.76	10	16.24	51.775	16	-1.69418	1.81e-06	5.24e-05
Exog	10	16.63	6	10.1	1	1.75	4	6.5	13.365	4.125	-1.69599	0.0266425	0.11614
Galnt14	6	9.98	17	28.61	4	7	3	4.87	19.295	5.935	-1.70091	0.00523925	0.0366637
Cep63	14	23.28	29	48.8	8	14.01	5	8.12	36.04	11.065	-1.7036	7.42e-05	0.00129639
Cdh18	22	36.58	22	37.02	11	19.26	2	3.25	36.8	11.255	-1.70914	4.77e-05	0.000890982
Chrd	6	9.98	7	11.78	1	1.75	3	4.87	10.88	3.31	-1.71678	0.049089	0.174756
Glra2	6	9.98	7	11.78	1	1.75	3	4.87	10.88	3.31	-1.71678	0.049089	0.174756
5330438D12Rik	18	29.93	26	43.76	10	17.51	3	4.87	36.845	11.19	-1.71926	4.77e-05	0.000890982
Akap5	51	84.8	21	35.34	18	31.52	3	4.87	60.07	18.195	-1.7231	2.33e-07	8.57e-06
Angpt1	16	26.6	11	18.51	5	8.75	3	4.87	22.555	6.81	-1.72772	0.00188656	0.0172762
Smpd3	36	59.86	15	25.24	10	17.51	5	8.12	42.55	12.815	-1.73133	1.03e-05	0.000242541
Gm17106	24	39.9	16	26.93	5	8.75	7	11.37	33.415	10.06	-1.73187	0.000128781	0.00199351
Gm7879	16	26.6	4	6.73	2	3.5	4	6.5	16.665	5	-1.73682	0.00937762	0.057111
Gm11942	14	23.28	9	15.15	1	1.75	6	9.74	19.215	5.745	-1.74185	0.00523925	0.0366637
Gm10687	1	1.66	16	26.93	3	5.25	2	3.25	14.295	4.25	-1.74998	0.0169299	0.0849664
Gm47071	22	36.58	12	20.19	5	8.75	5	8.12	28.385	8.435	-1.75067	0.000390895	0.00504381
Nphp4	14	23.28	3	5.05	2	3.5	3	4.87	14.165	4.185	-1.75903	0.0169299	0.0849664
Fryl	64	106.41	53	89.19	18	31.52	16	25.98	97.8	28.75	-1.76627	7.85e-12	5.34e-10
Pms1	6	9.98	8	13.46	3	5.25	1	1.62	11.72	3.435	-1.77059	0.0309206	0.128268
Fam208b	20	33.25	14	23.56	3	5.25	7	11.37	28.405	8.31	-1.77322	0.000390895	0.00504381
Spire2	15	24.94	6	10.1	4	7	2	3.25	17.52	5.125	-1.77338	0.00594083	0.0404701
Gm10033	14	23.28	3	5.05	1	1.75	4	6.5	14.165	4.125	-1.77986	0.0169299	0.0849664
Alox5ap	11	18.29	6	10.1	1	1.75	4	6.5	14.195	4.125	-1.78292	0.0169299	0.0849664
Oard1	20	33.25	19	31.97	8	14.01	3	4.87	32.61	9.44	-1.78846	9.11e-05	0.00153095
Fgd6	10	16.63	4	6.73	2	3.5	2	3.25	11.68	3.375	-1.79108	0.0309206	0.128268
9530077C05Rik	8	13.3	6	10.1	2	3.5	2	3.25	11.7	3.375	-1.79355	0.0309206	0.128268
Lrrc55	4	6.65	10	16.83	2	3.5	2	3.25	11.74	3.375	-1.79847	0.0309206	0.128268
Pex10	6	9.98	12	20.19	4	7	1	1.62	15.085	4.31	-1.80735	0.0106437	0.0624158
Pxmp2	30	49.88	17	28.61	10	17.51	3	4.87	39.245	11.19	-1.8103	1.23e-05	0.000283905
Gsta4	37	61.52	20	33.66	9	15.76	7	11.37	47.59	13.565	-1.81077	1.56e-06	4.55e-05
Hacl1	7	11.64	14	23.56	1	1.75	5	8.12	17.6	4.935	-1.83445	0.00594083	0.0404701
Sp4	35	58.19	11	18.51	3	5.25	10	16.24	38.35	10.745	-1.83556	1.94e-05	0.000419792
Hebp2	11	18.29	7	11.78	2	3.5	3	4.87	15.035	4.185	-1.84503	0.0106437	0.0624158
Rbm12b2	18	29.93	4	6.73	3	5.25	3	4.87	18.33	5.06	-1.857	0.00373076	0.0286981
Syn3	11	18.29	4	6.73	3	5.25	1	1.62	12.51	3.435	-1.8647	0.0192385	0.0931723
1300002E11Rik	12	19.95	6	10.1	1	1.75	4	6.5	15.025	4.125	-1.8649	0.0106437	0.0624158
Rps10-ps2	10	16.63	8	13.46	1	1.75	4	6.5	15.045	4.125	-1.86682	0.0106437	0.0624158
Car12	47	78.14	6	10.1	11	19.26	3	4.87	44.12	12.065	-1.8706	1.81e-06	5.24e-05
Slc25a29	17	28.27	13	21.88	5	8.75	3	4.87	25.075	6.81	-1.88052	0.000474795	0.00591276
Aqp11	15	24.94	8	13.46	5	8.75	1	1.62	19.2	5.185	-1.88869	0.00232385	0.0204047
1700126G02Rik	10	16.63	5	8.41	2	3.5	2	3.25	12.52	3.375	-1.89128	0.0192385	0.0931723
Lig1	10	16.63	5	8.41	2	3.5	2	3.25	12.52	3.375	-1.89128	0.0192385	0.0931723
Rnf113a2	5	8.31	10	16.83	2	3.5	2	3.25	12.57	3.375	-1.89703	0.0192385	0.0931723
Gm2464	7	11.64	8	13.46	1	1.75	3	4.87	12.55	3.31	-1.92278	0.0192385	0.0931723
Blm	6	9.98	9	15.15	1	1.75	3	4.87	12.565	3.31	-1.92451	0.0192385	0.0931723
Hcn3	5	8.31	10	16.83	1	1.75	3	4.87	12.57	3.31	-1.92508	0.0192385	0.0931723
Dpyd	16	26.6	11	18.51	4	7	3	4.87	22.555	5.935	-1.92613	0.000825418	0.00920198
2610037D02Rik	15	24.94	12	20.19	4	7	3	4.87	22.565	5.935	-1.92677	0.000825418	0.00920198
Asxl3	14	23.28	17	28.61	5	8.75	3	4.87	25.945	6.81	-1.92973	0.000295989	0.00402159
Rnf170	19	31.59	11	18.51	1	1.75	7	11.37	25.05	6.56	-1.93304	0.000474795	0.00591276
2410089E03Rik	29	48.22	22	37.02	6	10.51	7	11.37	42.62	10.94	-1.96192	1.91e-06	5.52e-05
Ift140	23	38.24	17	28.61	7	12.26	3	4.87	33.425	8.565	-1.9644	2.41e-05	0.00050901
Ggt5	8	13.3	4	6.73	2	3.5	1	1.62	10.015	2.56	-1.96795	0.0351896	0.139863
Gm42439	7	11.64	5	8.41	2	3.5	1	1.62	10.025	2.56	-1.96939	0.0351896	0.139863
Riok2	11	18.29	16	26.93	1	1.75	6	9.74	22.61	5.745	-1.97658	0.000825418	0.00920198
Iffo2	7	11.64	13	21.88	3	5.25	2	3.25	16.76	4.25	-1.97949	0.00408841	0.0306013
Amot	11	18.29	5	8.41	2	3.5	2	3.25	13.35	3.375	-1.98388	0.0118383	0.0668074
Ccdc57	8	13.3	4	6.73	1	1.75	2	3.25	10.015	2.5	-2.00216	0.0351896	0.139863
Cntn5	51	84.8	26	43.76	9	15.76	10	16.24	64.28	16	-2.0063	1.94e-09	9.76e-08
Lysmd1	10	16.63	6	10.1	1	1.75	3	4.87	13.365	3.31	-2.01356	0.0118383	0.0668074
Dclk3	17	28.27	4	6.73	4	7	1	1.62	17.5	4.31	-2.0216	0.00250164	0.0214549
Cntrl	24	39.9	13	21.88	4	7	5	8.12	30.89	7.56	-2.03068	4.1e-05	0.000784537
Sclt1	31	51.54	15	25.24	7	12.26	4	6.5	38.39	9.38	-2.03307	3.36e-06	9.16e-05
Rpp40	18	29.93	3	5.05	2	3.5	3	4.87	17.49	4.185	-2.06323	0.00250164	0.0214549
Kcnq1	9	14.96	17	28.61	4	7	2	3.25	21.785	5.125	-2.08771	0.000537663	0.00654091
Agbl4	39	64.84	38	63.95	8	14.01	10	16.24	64.395	15.125	-2.09001	7.57e-10	4.16e-08
Sema6c	5	8.31	21	35.34	4	7	2	3.25	21.825	5.125	-2.09036	0.000537663	0.00654091
Sdk1	17	28.27	13	21.88	3	5.25	4	6.5	25.075	5.875	-2.09359	0.000192315	0.00281163
Kcnh5	13	21.61	4	6.73	1	1.75	3	4.87	14.17	3.31	-2.09794	0.00721194	0.0468308
Gm38048	19	31.59	3	5.05	3	5.25	2	3.25	18.32	4.25	-2.10788	0.00151902	0.0147192
Cdh8	22	36.58	17	28.61	4	7	5	8.12	32.595	7.56	-2.10819	1.54e-05	0.000344318
Nsun3	12	19.95	1	1.68	1	1.75	2	3.25	10.815	2.5	-2.11303	0.0212958	0.0996992
Prelp	35	58.19	19	31.97	7	12.26	5	8.12	45.08	10.19	-2.14533	1.73e-07	6.64e-06
Asah2	8	13.3	14	23.56	1	1.75	4	6.5	18.43	4.125	-2.15959	0.00151902	0.0147192
Sncg	8	13.3	29	48.8	5	8.75	3	4.87	31.05	6.81	-2.18887	1.55e-05	0.000345956
Spryd4	7	11.64	7	11.78	2	3.5	1	1.62	11.71	2.56	-2.19353	0.012744	0.0702148
Gpr75	6	9.98	8	13.46	2	3.5	1	1.62	11.72	2.56	-2.19476	0.012744	0.0702148
AC100400.1	3	4.99	16	26.93	3	5.25	1	1.62	15.96	3.435	-2.21608	0.0026065	0.0220703
Efna5	32	53.21	11	18.51	6	10.51	3	4.87	35.86	7.69	-2.22132	2.07e-06	5.89e-05
Gm1976	27	44.89	16	26.93	4	7	5	8.12	35.91	7.56	-2.24793	2.07e-06	5.89e-05
Hs6st3	39	64.84	59	99.29	12	21.01	8	12.99	82.065	17	-2.27123	1.65e-13	1.3e-11
Pdpr	12	19.95	13	21.88	4	7	1	1.62	20.915	4.31	-2.27878	0.000326493	0.0043359
Fam78b	15	24.94	5	8.41	3	5.25	1	1.62	16.675	3.435	-2.2793	0.00154863	0.0148764
Gabrb2	5	8.31	15	25.24	3	5.25	1	1.62	16.775	3.435	-2.28793	0.00154863	0.0148764
Gm16536	9	14.96	6	10.1	2	3.5	1	1.62	12.53	2.56	-2.29117	0.00755069	0.0482472
E130102H24Rik	8	13.3	2	3.37	1	1.75	1	1.62	8.335	1.685	-2.30643	0.0386024	0.14844
Gm47135	8	13.3	2	3.37	1	1.75	1	1.62	8.335	1.685	-2.30643	0.0386024	0.14844
Col19a1	6	9.98	4	6.73	1	1.75	1	1.62	8.355	1.685	-2.30989	0.0386024	0.14844
Ninl	6	9.98	4	6.73	1	1.75	1	1.62	8.355	1.685	-2.30989	0.0386024	0.14844
Fan1	3	4.99	7	11.78	1	1.75	1	1.62	8.385	1.685	-2.31506	0.0386024	0.14844
Col25a1	13	21.61	33	55.54	6	10.51	3	4.87	38.575	7.69	-2.32661	4.41e-07	1.54e-05
Iqcg	5	8.31	10	16.83	1	1.75	2	3.25	12.57	2.5	-2.32998	0.00755069	0.0482472
Hnmt	18	29.93	8	13.46	4	7	1	1.62	21.695	4.31	-2.3316	0.000193226	0.0028126
Itih3	15	24.94	84	141.36	13	22.76	6	9.74	83.15	16.25	-2.35528	3.31e-14	2.73e-12
Arntl	21	34.92	21	35.34	5	8.75	3	4.87	35.13	6.81	-2.36698	1.18e-06	3.55e-05
Adgra3	13	21.61	13	21.88	1	1.75	4	6.5	21.745	4.125	-2.39822	0.000193226	0.0028126
Crtc2	12	19.95	9	15.15	1	1.75	3	4.87	17.55	3.31	-2.40657	0.000913691	0.00989914
Elp6	11	18.29	10	16.83	1	1.75	3	4.87	17.56	3.31	-2.40739	0.000913691	0.00989914
Islr	12	19.95	4	6.73	1	1.75	2	3.25	13.34	2.5	-2.41576	0.00443393	0.0326264
Klhl1	3	4.99	8	13.46	1	1.75	1	1.62	9.225	1.685	-2.4528	0.0224819	0.103878
1700008O03Rik	11	18.29	12	20.19	2	3.5	2	3.25	19.24	3.375	-2.51115	0.000312104	0.00420626
Cnbd2	13	21.61	10	16.83	1	1.75	3	4.87	19.22	3.31	-2.53771	0.000312104	0.00420626
Dtx3l	8	13.3	10	16.83	2	3.5	1	1.62	15.065	2.56	-2.55698	0.00149364	0.0146006
Ppil6	10	16.63	2	3.37	1	1.75	1	1.62	10	1.685	-2.56918	0.0129545	0.0708281
Dnajc28	6	9.98	6	10.1	1	1.75	1	1.62	10.04	1.685	-2.57494	0.0129545	0.0708281
Cdh4	13	21.61	12	20.19	3	5.25	1	1.62	20.9	3.435	-2.60512	0.00010427	0.00170098
Igf2	115	191.21	18	30.29	14	24.51	7	11.37	110.75	17.94	-2.62605	8.49e-21	1.13e-18
Gm26384	13	21.61	19	31.97	4	7	1	1.62	26.79	4.31	-2.63593	7.49e-06	0.000185488
A230001M10Rik	18	29.93	27	45.44	4	7	3	4.87	37.685	5.935	-2.66667	7.1e-08	2.83e-06
Gucy1a2	12	19.95	20	33.66	2	3.5	3	4.87	26.805	4.185	-2.6792	7.49e-06	0.000185488
Pi4k2b	8	13.3	5	8.41	1	1.75	1	1.62	10.855	1.685	-2.68754	0.00739567	0.04753
Dleu7	6	9.98	7	11.78	1	1.75	1	1.62	10.88	1.685	-2.69086	0.00739567	0.04753
Fgd5	5	8.31	8	13.46	1	1.75	1	1.62	10.885	1.685	-2.69152	0.00739567	0.04753
Ephx2	10	16.63	29	48.8	3	5.25	3	4.87	32.715	5.06	-2.69274	5.49e-07	1.87e-05
Mllt1	13	21.61	7	11.78	2	3.5	1	1.62	16.695	2.56	-2.7052	0.000489972	0.00608661
Lrig3	11	18.29	16	26.93	2	3.5	2	3.25	22.61	3.375	-2.744	3.42e-05	0.000684796
Cnpy4	12	19.95	9	15.15	2	3.5	1	1.62	17.55	2.56	-2.77726	0.00027824	0.0038115
Slc30a10	10	16.63	12	20.19	2	3.5	1	1.62	18.41	2.56	-2.84627	0.000157201	0.00236038
Sema4b	9	14.96	6	10.1	1	1.75	1	1.62	12.53	1.685	-2.89457	0.00235453	0.0205635
Htr2c	74	123.04	18	30.29	5	8.75	7	11.37	76.665	10.06	-2.92994	2.11e-16	2.14e-14
Brpf3	3	4.99	20	33.66	1	1.75	2	3.25	19.325	2.5	-2.95047	8.84e-05	0.00149578
B230209E15Rik	12	19.95	4	6.73	1	1.75	1	1.62	13.34	1.685	-2.98494	0.00131529	0.0131661
Eda	10	16.63	6	10.1	1	1.75	1	1.62	13.365	1.685	-2.98764	0.00131529	0.0131661
Hdhd5	7	11.64	9	15.15	1	1.75	1	1.62	13.395	1.685	-2.99087	0.00131529	0.0131661
Pou6f2	13	21.61	4	6.73	1	1.75	1	1.62	14.17	1.685	-3.07202	0.00073055	0.0083017
Gm45193	21	34.92	8	13.46	2	3.5	1	1.62	24.19	2.56	-3.2402	2.58e-06	7.3e-05
Fuk	21	34.92	12	20.19	2	3.5	1	1.62	27.555	2.56	-3.4281	2.3e-07	8.48e-06
Gm44675	15	24.94	13	21.88	1	1.75	1	1.62	23.41	1.685	-3.7963	8.75e-07	2.76e-05
