# Supplementary material for: Spatial transcriptomic atlas of murine neurotoxocariasis reveals region-specific host responses and dysfunction in the brain
Source: Research Square preprint supplement (doi:10.21203/rs.3.rs-6743037/v1), 2025-06-09
Supplement: Supplementary file 3 [file 781cfdcd0cfb7c0f38cf9a7a.xlsx]

## Sheet: Table S4
Table S4. Transcripts of Toxocara canis sequenced in mouse brain slices S1, S2, S3, S4, S5 and S6 using Stereo-seq data, and annotation of inferred proteins.
Gene ID	Symbol	Length aa	KEGG Orthology	Description	Classification	Brite	Section 1 (MID)	Section 2 (MID)	Section 3 (MID)	Section 4 (MID)	Section 5 (MID)	Section 6 (MID)	Total MID
Tcan_18181.1	act	376	K05692	Actin beta/gamma 1	Cytoskeleton proteins	Genetic information processing; Signalling and cellular processes	4	5	1	46	2	12	70
Tcan_18170.1	act	386	K05692	Actin beta/gamma 1	Cytoskeleton proteins	Genetic information processing; Signalling and cellular processes	/	/	2	12	/	/	14
Tcan_09977.1	act	257	K05692	Actin beta/gamma 1	Cytoskeleton proteins	Genetic information processing; Signalling and cellular processes	/	1	2	2	/	1	6
Tcan_17079.1	act	324	K05692	Actin beta/gamma 1	Cytoskeleton proteins	Genetic information processing; Signalling and cellular processes	/	/	1	/	/	/	1
Tcan_18165.1	act	456	K05692	Actin beta/gamma 1	Cytoskeleton proteins	Genetic information processing; Signalling and cellular processes	/	/	/	/	1	/	1
Tcan_10106.1	msp	109	/	Major sperm protein	Cytoskeleton proteins	/	/	/	/	6	/	/	6
Tcan_05899.1	PUMA1	1806	/	Spindle-and centromere-associated protein	Cytoskeleton proteins	/	/	/	1	3	/	/	4
Tcan_14318.1	PUMA1	2166	/	Spindle-and centromere-associated protein	Cytoskeleton proteins	/	/	/	1	/	/	1	2
Tcan_05881.1	PUMA1	2017	/	Spindle-and centromere-associated protein; Gag P30 core shell protein	Cytoskeleton proteins	/	/	4	3	/	/	/	7
Tcan_14305.1	PUMA1	1372	/	Spindle-and centromere-associated protein; Gag P30 core shell protein	Cytoskeleton proteins	/	1	1	/	1	/	/	3
Tcan_17169.1	PUMA1	1213	/	Spindle-and centromere-associated protein; Gag P30 core shell protein	Cytoskeleton proteins	/	/	/	1	/	/	2	3
Tcan_12641.1	PUMA1	526	/	Spindle-and centromere-associated protein; Gag P30 core shell protein	Cytoskeleton proteins	/	/	1	/	/	/	/	1
Tcan_12407.1	PUMA1	2086	/	Tropomyosin 1; Gag P30 core shell protein	Cytoskeleton proteins	/	/	/	3	18	/	4	25
Tcan_10818.1	acat1-a	811	K00626	Acetyl-CoA acetyltransferase A, mitochondrial	Enzymes	Metabolism; Signalling and cellular processes	/	1	/	2	/	/	3
Tcan_18697.1	acss2	401	/	Acetyl-coenzyme A synthetase, cytoplasmic	Enzymes	/	/	1	1	5	/	/	7
Tcan_09971.1	ASCC3	1031	/	Activating signal cointegrator 1 complex subunit 3, Helicase_C	Enzymes	/	/	/	/	1	/	/	1
Tcan_04065.1	ACOT9	390	K17361	Acyl-coenzyme A thioesterase 9, mitochondrial; acyl-CoA hydrolase activity	Enzymes	Metabolism	/	1	1	/	/	/	2
Tcan_04067.1	ACOT9	403	K17361	Acyl-coenzyme A thioesterase 9, mitochondrial; acyl-CoA hydrolase activity	Enzymes	Metabolism	/	/	/	2	/	/	2
Tcan_12755.1	fut3	411	K14464	alpha-1,3-fucosyltransferase	Enzymes	/	/	/	/	1	/	/	1
Tcan_18463.1	GLB1	689	K12309	Beta-galactosidase	Enzymes	Metabolism; Signalling and cellular processes	2	1	1	3	2	/	9
Tcan_18445.1	GLB1	288	/	Beta-galactosidase	Enzymes	/	/	/	/	1	/	/	1
Tcan_04388.1	cpt1a	698	/	Carnitine O-palmitoyltransferase 1	Enzymes	/	/	/	/	1	/	/	1
Tcan_16074.1	RPN2	105	/	Dolichyl-diphosphooligosaccharide--protein glycosyltransferase subunit 2	Enzymes	/	/	/	/	2	/	/	2
Tcan_16654.1	fut-3	392	/	Fucosyltransferase	Enzymes	/	/	/	/	/	3	/	3
Tcan_07280.1	fut-3	345	/	Fucosyltransferase	Enzymes	/	1	/	/	/	/	/	1
Tcan_04044.1	ugt-50	641	/	Glucuronosyltransferase	Enzymes	/	/	/	/	/	2	/	2
Tcan_05130.1	ugt-50	612	/	Glucuronosyltransferase	Enzymes	/	/	1	/	/	/	/	1
Tcan_08597.1	acsl5	709	K01897	Long-chain-fatty-acid--CoA ligase 5; long-chain acyl-CoA synthetase; AMP-binding enzyme	Enzymes	Metabolism; Signalling and cellular processes	/	1	/	/	/	1	2
Tcan_12157.1	mmcm-1	1126	K01847	Methylmalonyl-CoA mutase	Enzymes	Metabolism	/	/	/	1	/	/	1
Tcan_03096.1	mlt-7	607	/	Peroxidase mlt-7; Cuticle development involved in collagen and cuticulin-based cuticle molting cycle	Enzymes	/	2	2	1	/	1	1	7
Tcan_03102.1	mlt-7	702	/	Peroxidase mlt-7; Cuticle development involved in collagen and cuticulin-based cuticle molting cycle	Enzymes	/	1	5	/	/	1	/	7
Tcan_06114.1	ndx-2	197	/	Putative nudix hydrolase 2	Enzymes	/	/	/	/	3	/	/	3
Tcan_15934.1	ndx-2	238	/	Putative nudix hydrolase 2	Enzymes	/	/	/	/	/	1	/	1
Tcan_04166.1		2440	/	Serine-type endopeptidase inhibitor; cuticle biosynthesis	Enzymes	/	/	1	/	1	/	/	2
Tcan_11817.1	kin-31	433	/	Tyrosine-protein kinase	Enzymes	/	/	/	/	/	/	1	1
Tcan_02863.1	XDH	1423	K00106	Xanthine dehydrogenase	Enzymes	Metabolism; Signalling and cellular processes	/	1	/	/	/	/	1
Tcan_19002.1	TES-120	182	/	120 kDa secreted antigen, mucin-1	Excretory/secretory proteins	/	/	/	/	3553	472	451	4476
Tcan_19003.1	TES-120	161	/	120 kDa secreted antigen, mucin-1	Excretory/secretory proteins	/	/	/	/	374	113	1	488
Tcan_00005.1	TES-120	116	/	120 kDa secreted antigen, mucin-2	Excretory/secretory proteins	/	/	/	/	2	/	3	5
Tcan_01248.1	TES-120	81	/	120 kDa secreted antigen, mucin-3	Excretory/secretory proteins	/	/	/	/	3	/	/	3
Tcan_00003.1	TES-120	244	/	120 kDa secreted antigen, mucin-4	Excretory/secretory proteins	/	/	/	/	3	1	7	11
Tcan_01235.1	TES-120	107	/	120 kDa secreted antigen, mucin-4	Excretory/secretory proteins	/	/	/	/	/	1	1	2
Tcan_17212.1	TES-120	305	/	120 kDa secreted antigen, mucin-5	Excretory/secretory proteins	/	/	/	/	8	/	5	13
Tcan_18999.1	TES-26	163	/	26 kDa secreted antigen, phosphatidylethanolamine-binding protein	Excretory/secretory proteins	/	/	/	/	49	10	25	84
Tcan_12073.1	TES-26	262	K06910	26 kDa secreted antigen, phosphatidylethanolamine-binding protein	Excretory/secretory proteins	/	/	/	/	44	13	16	73
Tcan_02769.1	TES-26	258	/	26 kDa secreted antigen, phosphatidylethanolamine-binding protein	Excretory/secretory proteins	/	/	/	/	47	1	/	48
Tcan_12049.1	TES-26	262	K06910	26 kDa secreted antigen, phosphatidylethanolamine-binding protein	Excretory/secretory proteins	/	/	/	/	46	2	/	48
Tcan_12063.1	TES-26	463	/	26 kDa secreted antigen, phosphatidylethanolamine-binding protein	Excretory/secretory proteins	/	/	/	/	24	4	5	33
Tcan_12345.1	TES-26	258	/	26 kDa secreted antigen, phosphatidylethanolamine-binding protein	Excretory/secretory proteins	/	/	/	/	18	/	/	18
Tcan_07083.1	TES-26	135	K06910	26 kDa secreted antigen, phosphatidylethanolamine-binding protein	Excretory/secretory proteins	/	/	/	/	14	/	2	16
Tcan_02129.1	TES-26	153	K06910	26 kDa secreted antigen, phosphatidylethanolamine-binding protein	Excretory/secretory proteins	/	/	/	/	8	/	/	8
Tcan_13529.1	TES-26	458	/	26 kDa secreted antigen, phosphatidylethanolamine-binding protein	Excretory/secretory proteins	/	/	/	/	1	/	/	1
Tcan_00009.1	TES-32	257	/	32 kDa secreted antigen, C-type lectin	Excretory/secretory proteins	/	/	/	/	1038	109	152	1299
Tcan_00020.1	TES-32	245	/	32 kDa secreted antigen, C-type lectin	Excretory/secretory proteins	/	/	/	/	829	148	146	1123
Tcan_00022.1	TES-32	253	/	32 kDa secreted antigen, C-type lectin	Excretory/secretory proteins	/	/	/	/	748	40	60	848
Tcan_03886.1	TES-32	1115	/	32 kDa secreted antigen, C-type lectin	Excretory/secretory proteins	/	/	/	/	124	15	20	159
Tcan_04679.1	TES-32	226	/	32 kDa secreted antigen, C-type lectin	Excretory/secretory proteins	/	/	/	/	13	/	1	14
Tcan_06369.1	TES-32	288	/	32 kDa secreted antigen, C-type lectin	Excretory/secretory proteins	/	/	/	/	2	/	/	2
Tcan_06383.1	TES-32	330	/	32 kDa secreted antigen, C-type lectin	Excretory/secretory proteins	/	/	/	/	2	/	/	2
Tcan_17238.1	TES-32	152	/	32 kDa secreted antigen, C-type lectin	Excretory/secretory proteins	/	/	/	/	/	/	1	1
Tcan_00023.1	TES-32	253	K10061	32 kDa secreted antigen, C-type lectin superfamily 4 member G, CLEC4G	Excretory/secretory proteins	/	/	/	/	22	/	1	23
Tcan_05890.1		207	/	CAP domain containing protein	Excretory/secretory proteins	/	/	2	/	/	/	/	2
Tcan_10296.1	cpg-3	160	/	Chondroitin proteoglycan 3	Excretory/secretory proteins	/	1	/	/	/	/	/	1
Tcan_14771.1	cpg-3	160	/	Chondroitin proteoglycan 3	Excretory/secretory proteins	/	1	/	/	/	/	/	1
Tcan_16887.1	cpg-3	245	/	Chondroitin proteoglycan 3	Excretory/secretory proteins	/	/	/	/	/	1	/	1
Tcan_00024.1		440	/	Venom allergen like protein	Excretory/secretory proteins	/	/	1	/	44	1	10	56
Tcan_11592.1		546	/	Venom allergen like protein	Excretory/secretory proteins	/	/	/	/	10	/	2	12
Tcan_17640.1		348	/	Venom allergen like protein	Excretory/secretory proteins	/	/	/	/	/	/	1	1
Tcan_02573.1		416	/	Venom allergen like protein; Belongs to the CRISP family	Excretory/secretory proteins	/	/	/	3	27	1	7	38
Tcan_04905.1		247	K24834	Venom allergen like protein; glioma pathogenesis-related protein 1; SCP / Tpx-1 / Ag5 / PR-1 / Sc7 family of extracellular domains	Excretory/secretory proteins	/	/	/	20	196	22	196	434
Tcan_02708.1		444	K26201	FMRFamide receptor	G protein-coupled receptors	Signalling and cellular processes	/	/	/	2	/	1	3
Tcan_02826.1		411	/	FMRFamide receptor	G protein-coupled receptors	/	/	/	/	1	/	/	1
Tcan_05594.1		442	/	FMRFamide receptor	G protein-coupled receptors	Signalling and cellular processes	/	/	1	/	/	/	1
Tcan_03849.1		550	/	FMRFamide receptor; rhodopsin family	G protein-coupled receptors	/	1	/	/	/	/	/	1
Tcan_05954.1		225	K26201	FMRFamide receptor; rhodopsin family	G protein-coupled receptors	/	/	/	/	1	/	/	1
Tcan_07525.1		497	/	FMRFamide receptor; Serpentine type	G protein-coupled receptors	/	/	/	/	1	/	/	1
Tcan_13748.1	rho-1	192	K04513	Ras-like GTP-binding protein rhoA	G protein-coupled receptors	Genetic information processing; Signalling and cellular processes	2	9	3	/	2	/	16
Tcan_14998.1	rho-1	226	K04513	Ras-like GTP-binding protein rhoA	G protein-coupled receptors	Genetic information processing; Signalling and cellular processes	/	/	1	9	/	4	14
Tcan_02217.1	rho-1	128	/	Ras-like GTP-binding protein rhoA	G protein-coupled receptors	/	/	1	/	/	/	/	1
Tcan_09110.1	rgs-7	699	/	Regulator of G-protein signaling rgs-7	G protein-coupled receptors	/	1	1	2	/	1	1	6
Tcan_09107.1	rgs-7	223	K16449	Regulator of G-protein signaling rgs-7	G protein-coupled receptors	/	/	1	1	/	/	/	2
Tcan_10547.1	srab-14	367	/	Serpentine receptor class alpha/beta-14	G protein-coupled receptors	/	/	/	/	3	/	/	3
Tcan_11671.1	srab-14	397	/	Serpentine receptor class alpha/beta-14	G protein-coupled receptors	/	/	1	1	/	/	/	2
Tcan_14386.1	srab-14	380	/	Serpentine receptor class alpha/beta-14	G protein-coupled receptors	/	/	/	/	2	/	/	2
Tcan_03314.1	spr	430	K26200	Sex peptide receptor; Serpentine type	G protein-coupled receptors	Signalling and cellular processes	/	1	1	/	3	1	6
Tcan_17330.1	spr	423	K26200	Sex peptide receptor; Serpentine type	G protein-coupled receptors	Signalling and cellular processes	/	/	/	/	1	/	1
Tcan_13604.1	best-24	321	/	Bestrophin; Forms chloride channels	Ion channels	/	/	1	/	5	3	/	9
Tcan_12485.1	best-24	645	/	Bestrophin; Forms chloride channels	Ion channels	/	1	1	/	1	1	2	6
Tcan_17052.1	best-24	522	K22204	Bestrophin; Forms chloride channels	Ion channels	Signalling and cellular processes	/	/	/	1	/	4	5
Tcan_05261.1		637	K22204	Bestrophin; Forms chloride channels	Ion channels	Signalling and cellular processes	/	/	/	2	/	/	2
Tcan_12559.1		773	/	Bestrophin; Forms chloride channels	Ion channels	/	/	/	/	1	/	/	1
Tcan_03825.1		704	K22204	Bestrophin; Forms chloride channels	Ion channels	Signalling and cellular processes	1	/	/	/	/	/	1
Tcan_03831.1	best-24	491	K13881	Bestrophin-4; chloride channel activity (GO:0005254)	Ion channels	Signalling and cellular processes	1	/	/	/	/	/	1
Tcan_11729.1		482	K13881	Bestrophin-4; chloride channel activity (GO:0005254)	Ion channels	Signalling and cellular processes	/	/	/	/	1	/	1
Tcan_08396.1	inx	585	K22037	Innexin; Structural component of the gap junctions	Ion channels	Signalling and cellular processes	/	1	2	/	/	1	4
Tcan_13756.1	acr-16	717	K05312	Nicotinic acetylcholine receptor subunit alpha-type acr-16; Neurotransmitter-gated ion-channel transmembrane region	Ion channels	Signalling and cellular processes	/	1	/	/	2	/	3
Tcan_02727.1	acr-16	505	K05312	Nicotinic acetylcholine receptor, invertebrate; acetylcholine-gated cation-selective channel activity	Ion channels	Signalling and cellular processes	/	/	/	1	/	/	1
Tcan_16236.1	cut-1	2139	/	Cuticlin-1; Collagen and cuticulin-based cuticle extracellular matrix	Nematode cuticle structural proteins	/	/	3	7	10	9	6	35
Tcan_13941.1	cut-1	788	/	Cuticlin-1; Collagen and cuticulin-based cuticle extracellular matrix	Nematode cuticle structural proteins	/	/	2	1	/	/	1	4
Tcan_06061.1	cut-1	475	/	Cuticlin-1; Collagen and cuticulin-based cuticle extracellular matrix	Nematode cuticle structural proteins	/	2	1	/	/	/	/	3
Tcan_16633.1	cut-1	296	/	Cuticlin-1; Collagen and cuticulin-based cuticle extracellular matrix	Nematode cuticle structural proteins	/	/	/	/	/	2	/	2
Tcan_04522.1	cut-1	383	/	Cuticlin-1; Collagen and cuticulin-based cuticle extracellular matrix	Nematode cuticle structural proteins	/	/	1	/	1	/	/	2
Tcan_06772.1	cut-1	360	/	Cuticlin-1; Collagen and cuticulin-based cuticle extracellular matrix	Nematode cuticle structural proteins	/	/	1	/	/	1	/	2
Tcan_10132.1	cut-1	382	/	Cuticlin-1; Collagen and cuticulin-based cuticle extracellular matrix	Nematode cuticle structural proteins	/	/	/	/	1	/	/	1
Tcan_03227.1	cut-1	535	/	Cuticlin-1; Collagen and cuticulin-based cuticle extracellular matrix	Nematode cuticle structural proteins	/	/	1	/	/	/	/	1
Tcan_06763.1	cut-1	366	/	Cuticlin-1; Collagen and cuticulin-based cuticle extracellular matrix	Nematode cuticle structural proteins	/	/	/	1	/	/	/	1
Tcan_07689.1	dpy-5	324	/	Nematode cuticle collagen	Nematode cuticle structural proteins	/	/	/	/	16	/	/	16
Tcan_03819.1	col-155	364	/	Nematode cuticle collagen	Nematode cuticle structural proteins	/	/	/	/	10	/	/	10
Tcan_14268.1	col-155	315	/	Nematode cuticle collagen	Nematode cuticle structural proteins	/	/	/	2	6	/	/	8
Tcan_07072.1	col-155	302	/	Nematode cuticle collagen	Nematode cuticle structural proteins	/	/	/	/	/	/	3	3
Tcan_11621.1	col-155	294	/	Nematode cuticle collagen	Nematode cuticle structural proteins	/	/	/	/	2	/	/	2
Tcan_03821.1	col-155	555	/	Nematode cuticle collagen	Nematode cuticle structural proteins	/	/	/	/	2	/	/	2
Tcan_06494.1	col-40	346	/	Nematode cuticle collagen	Nematode cuticle structural proteins	/	/	/	/	2	/	/	2
Tcan_08910.1	rol-8	333	/	Nematode cuticle collagen	Nematode cuticle structural proteins	/	1	/	/	/	/	/	1
Tcan_09644.1	col-155	321	/	Nematode cuticle collagen	Nematode cuticle structural proteins	/	/	/	/	/	1	/	1
Tcan_18079.1	col-155	288	/	Nematode cuticle collagen	Nematode cuticle structural proteins	/	/	/	1	/	/	/	1
Tcan_09436.1	col-40	293	/	Nematode cuticle collagen 40	Nematode cuticle structural proteins	/	/	/	/	8	/	1	9
Tcan_08879.1	col-40	336	/	Nematode cuticle collagen 40	Nematode cuticle structural proteins	/	/	/	/	3	/	/	3
Tcan_09449.1	col-40	290	/	Nematode cuticle collagen 40	Nematode cuticle structural proteins	/	/	1	/	/	/	/	1
Tcan_18002.1	col-40	390	/	Nematode cuticle collagen 40	Nematode cuticle structural proteins	/	1	/	/	/	/	/	1
Tcan_18429.1	dpy-5	254	/	Nematode cuticle collagen dpy-5	Nematode cuticle structural proteins	/	/	/	3	32	5	6	46
Tcan_11108.1	dpy-5	281	/	Nematode cuticle collagen dpy-5	Nematode cuticle structural proteins	/	/	/	/	9	/	/	9
Tcan_09201.1	dpy-5	283	/	Nematode cuticle collagen dpy-5	Nematode cuticle structural proteins	/	/	/	/	5	/	/	5
Tcan_09518.1	dpy-5	271	/	Nematode cuticle collagen dpy-5	Nematode cuticle structural proteins	/	1	/	/	/	/	1	2
Tcan_11754.1	dpy-5	346	/	Nematode cuticle collagen dpy-5	Nematode cuticle structural proteins	/	/	1	/	/	1	/	2
Tcan_11831.1	dpy-5	285	/	Nematode cuticle collagen dpy-5	Nematode cuticle structural proteins	/	/	/	/	2	/	/	2
Tcan_12460.1	dpy-5	300	/	Nematode cuticle collagen dpy-5	Nematode cuticle structural proteins	/	/	/	/	1	/	/	1
Tcan_13684.1	dpy-5	1172	/	Nematode cuticle collagen dpy-5	Nematode cuticle structural proteins	/	1	/	/	/	/	/	1
Tcan_15194.1	dpy-5	337	/	Nematode cuticle collagen dpy-5; structural constituent of cuticle	Nematode cuticle structural proteins	/	/	/	/	30	2	8	40
Tcan_03817.1	bli-6	307	/	Nematode cuticle collagen; structural constituent of cuticle	Nematode cuticle structural proteins	/	2	1	/	/	/	/	3
Tcan_10611.1	ani-2	161	/	Anillin-like protein 2; mitotic cytokinesis (GO:0000281)	Others	/	/	/	1	/	/	/	1
Tcan_06937.1	ani-2	257	/	Anillin-like protein 2; mitotic cytokinesis (GO:0000281)	Others	/	/	/	/	/	/	1	1
Tcan_17745.1	ASCEC-2	80	/	Cecropin	Others	/	/	/	/	1	/	/	1
Tcan_12709.1	his-11	121	K11252	Histone H2B	Others	Genetic information processing	/	/	/	2	/	/	2
Tcan_07708.1	his-11	122	K11252	Histone H2B	Others	Genetic information processing; Signalling and cellular processes	/	/	/	1	/	/	1
Tcan_12692.1	his-11	121	K11252	Histone H2B	Others	Genetic information processing; Signalling and cellular processes	/	/	/	1	/	/	1
Tcan_00463.1		779	/	Kunitz-type serine protease inhibitor	Others	/	/	/	2	/	2	/	4
Tcan_02737.1		984	/	Kunitz-type serine protease inhibitor	Others	/	/	1	/	1	/	/	2
Tcan_07531.1		1549	/	Kunitz-type serine protease inhibitor	Others	/	/	/	1	/	/	1	2
Tcan_16156.1	Nup93	789	K14309	Nuclear pore complex protein	Others	Genetic information processing	/	/	/	/	/	1	1
Tcan_02741.1	mig-6	614	/	Papilin	Others	/	/	/	/	1	/	/	1
Tcan_11192.1	prom1	860	/	Prominin-like protien	Others	/	/	1	/	/	/	/	1
Tcan_09277.1		277	/	R10E12.2	Others	/	/	/	1	/	/	/	1
Tcan_17484.1	rmd-1	156	/	Regulator of microtubule dynamics protein 1	Others	/	/	/	/	1	/	/	1
Tcan_17489.1	rmd-1	627	/	Regulator of microtubule dynamics protein 1	Others	/	1	/	/	/	/	/	1
Tcan_09654.1	OV25-1	289	/	Small heat shock protein OV25-1; protein refolding (GO:0042026)	Others	/	/	/	/	1	2	2	5
Tcan_09643.1	OV25-1	173	/	Small heat shock protein OV25-1; protein refolding (GO:0042026)	Others	/	/	/	/	3	/	/	3
Tcan_09551.1	OV25-1	176	/	Small heat shock protein OV25-1; protein refolding (GO:0042026)	Others	/	/	/	/	1	/	/	1
Tcan_05879.1	mup-2	331	K12046	Troponin T, regulation of muscle system process	Others	Signalling and cellular processes	/	/	2	22	4	1	29
Tcan_05894.1	mup-2	514	K12046	Troponin T, regulation of muscle system process	Others	Signalling and cellular processes	/	2	5	1	1	1	10
Tcan_05878.1	mup-2	490	K12046	Troponin T, regulation of muscle system process	Others	Signalling and cellular processes	/	/	3	1	/	3	7
Tcan_11506.1	mup-2	127	/	Troponin T, regulation of muscle system process	Others	/	/	/	/	1	/	/	1
Tcan_12159.1	mup-2	380	K12046	Troponin T, regulation of muscle system process	Others	Signalling and cellular processes	/	/	/	1	/	/	1
Tcan_12172.1	mup-2	364	K12046	Troponin T, regulation of muscle system process	Others	Signalling and cellular processes	/	/	1	/	/	/	1
Tcan_18264.1	mup-2	394	K12046	Troponin T, regulation of muscle system process	Others	Signalling and cellular processes	/	/	/	/	/	1	1
Tcan_10661.1	mup-2	825	/	Troponin T; regulation of muscle contraction (GO:0006937)	Others	/	/	/	5	34	6	3	48
Tcan_10922.1		188	/	Zinc ion binding in lysosomal membrane; Possible membrane-associated motif in LPS-induced tumor necrosis factor alpha factor (LITAF), also known as PIG7	Others	/	/	/	1	4	1	2	8
Tcan_09599.1		165	/	Zinc ion binding in lysosomal membrane; Possible membrane-associated motif in LPS-induced tumor necrosis factor alpha factor (LITAF), also known as PIG7	Others	/	/	/	1	/	/	/	1
Tcan_10401.1	abcd4	670	K05678	ATP-binding cassette sub-family D member 4	Transporters	Metabolism; Signalling and cellular processes	/	/	/	1	/	/	1
Tcan_13211.1	abcd4	661	K05678	ATP-binding cassette sub-family D member 4	Transporters	Metabolism; Signalling and cellular processes	/	/	/	1	/	/	1
Tcan_10392.1	abcd4	723	/	ATP-binding cassette sub-family D member 4	Transporters	/	/	/	/	/	2	/	2
Tcan_11213.1	pgp-3	1355	K05658	ATP-binding cassette, subfamily B (MDR/TAP)	Transporters	Metabolism; Signalling and cellular processes	/	/	/	/	4	/	4
Tcan_06484.1	pgp-3	1368	K05660	ATP-binding cassette, subfamily B (MDR/TAP)	Transporters	Signalling and cellular processes	1	2	1	/	/	/	4
Tcan_11438.1	pgp-3	1368	K02021	ATP-binding cassette, subfamily B (MDR/TAP)	Transporters	Signalling and cellular processes	/	/	/	2	/	/	2
Tcan_02789.1	pgp-3	1352	K05658	ATP-binding cassette, subfamily B (MDR/TAP)	Transporters	Metabolism; Signalling and cellular processes	/	/	/	1	/	1	2
Tcan_04769.1	pgp-3	1268	K05658	ATP-binding cassette, subfamily B (MDR/TAP)	Transporters	Metabolism; Signalling and cellular processes	/	/	1	/	/	1	2
Tcan_07528.1	mfsd8	548	/	Major facilitator superfamily domain-containing protein 8	Transporters	/	/	1	1	/	/	/	2
Tcan_17490.1	mfsd8	445	/	Major facilitator superfamily domain-containing protein 8; transmembrane transport	Transporters	/	/	2	/	5	1	/	8
Tcan_12094.1	Ptchd3	881	/	Patched domain-containing protein, NPC1/NCR1	Transporters	/	3	2	1	2	1	4	13
Tcan_03767.1	Ptchd3	910	/	Patched domain-containing protein, NPC1/NCR1	Transporters	/	/	/	/	3	/	1	4
Tcan_13671.1	Ptchd3	950	/	Patched domain-containing protein, NPC1/NCR1	Transporters	/	/	/	/	/	2	1	3
Tcan_17073.1	Ptchd3	773	/	Patched domain-containing protein, NPC1/NCR1	Transporters	/	1	/	1	/	1	/	3
Tcan_10230.1	Ptchd3	931	/	Patched domain-containing protein, NPC1/NCR1	Transporters	/	/	1	1	/	/	/	2
Tcan_17187.1	Ptchd3	709	/	Patched domain-containing protein, NPC1/NCR1	Transporters	/	/	/	/	1	1	/	2
Tcan_05952.1	Ptchd3	881	/	Patched domain-containing protein, NPC1/NCR1	Transporters	/	/	2	/	/	/	/	2
Tcan_05967.1	ptchd3	905	K24682	Patched domain-containing protein, NPC1/NCR1	Transporters	/	1	/	/	/	/	/	1
Tcan_10935.1	Ptchd3	863	/	Patched domain-containing protein, NPC1/NCR1	Transporters	/	/	/	1	/	/	/	1
Tcan_12760.1	Ptchd3	971	/	Patched domain-containing protein, NPC1/NCR1	Transporters	/	/	/	1	/	/	/	1
Tcan_16648.1	Ptchd3	914	/	Patched domain-containing protein, NPC1/NCR1	Transporters	/	/	/	/	/	1	/	1
Tcan_17064.1	ptchd3	671	/	Patched domain-containing protein, NPC1/NCR1	Transporters	/	/	1	/	/	/	/	1
Tcan_03745.1	ptchd3	744	/	Patched domain-containing protein, NPC1/NCR1	Transporters	/	/	1	/	/	/	/	1
Tcan_03753.1	Ptchd3	891	/	Patched domain-containing protein, NPC1/NCR1	Transporters	/	/	/	1	/	/	/	1
Tcan_05871.1	Ptchd3	864	/	Patched domain-containing protein, NPC1/NCR1; Sterol-sensing	Transporters	/	/	/	/	4	/	/	4
Tcan_02838.1	ptchd3	790	/	Patched domain-containing protein, NPC1/NCR1; Sterol-sensing	Transporters	/	/	1	/	/	/	/	1
Tcan_10825.1	Ptchd3	1000	/	Patched domain-containing protein, NPC1/NCR1; Sterol-sensing domain of SREBP cleavage-activation	Transporters	/	1	1	1	2	1	/	6
Tcan_16547.1	slc26a5	756	K14703	Solute carrier family 26, member 5	Transporters	Signalling and cellular processes	/	/	/	2	/	/	2
Tcan_08137.1	slc26a5	627	K14453	Solute carrier family 26, other	Transporters	Signalling and cellular processes	1	/	/	/	/	/	1
Tcan_06945.1	slc26a5	869	/	Solute carrier family, prestin	Transporters	/	/	/	/	1	/	/	1
Tcan_06354.1	ttr-46	230	/	Transthyretin-like protein 46	Transporters	/	/	/	4	30	/	/	34
Tcan_15250.1	ttr-46	123	/	Transthyretin-like protein 46	Transporters	/	/	/	7	17	1	5	30
Tcan_06386.1	ttr-46	170	/	Transthyretin-like protein 46	Transporters	/	/	/	/	25	/	/	25
Tcan_10079.1	ttr-46	141	/	Transthyretin-like protein 46	Transporters	/	/	2	12	6	1	/	21
Tcan_06372.1	ttr-46	121	/	Transthyretin-like protein 46	Transporters	/	/	/	2	10	/	/	12
Tcan_15254.1	ttr-46	147	/	Transthyretin-like protein 46	Transporters	/	/	/	/	3	/	/	3
Tcan_07735.1	ttr-46	95	/	Transthyretin-like protein 46	Transporters	/	/	/	/	2	/	/	2
Tcan_05886.1	ttr-46	155	/	Transthyretin-like protein 46	Transporters	/	/	/	/	1	/	/	1
