# Supplementary material for: Spatial transcriptomic atlas of murine neurotoxocariasis reveals region-specific host responses and dysfunction in the brain
Source: Research Square preprint supplement (doi:10.21203/rs.3.rs-6743037/v1), 2025-06-09
Supplement: Supplementary file 4 [file 85c3372c31f7fecda14e8092.xlsx]

## Sheet: Table S2
Table S2. Differential analysis of lipid metabolites between sera collected from Toxocara canis-infected mice at 21 days after infection and -uninfected controls – using LC-MS/MS data.
Type	ID	MZ	RT	MS2.name	MS2_score	Formula	class	classname	level3	level2	level1	MS1.name	PTV_1	PTV_2	PTV_3	PTV_4	PTV_5	PTV_6	NC_1	NC_2	NC_3	NC_4	NC_5	NC_6	mean	mean_PTV	mean_NC	FC	regulation	p_value	q_value	VIP
POS	POS_1039.67_2.0595	1039.67	2.0595	DGDG O-19:2_24:6	77.09	C58H96O14	DGDG	Digalactosyldiacylglycerol				"LysoPC(18:2(9Z,12Z)/0:0);LysoPC(0:0/18:2(9Z,12Z))"	2553.06	1694.95	1912.98	2947.62	6841.15	2865.64	379997	330769	289215	313886	257725	327594	159834	3135.9	316531	0.0099	down	7.98486e-07	2.3579e-05	3.64478
POS	POS_736.525_4.8867	736.525	4.8867	PC 34:6e	83.21	C42H74NO7P	PC	Phosphatidylcholine	Diacylglycerophosphocholines [GP0101]	Glycerophosphocholines [GP01]	Glycerophospholipids [GP]	"PC(14:1(9Z)/P-18:1(11Z));PC(14:1(9Z)/P-18:1(9Z));PC(P-18:1(11Z)/14:1(9Z));PC(P-18:1(9Z)/14:1(9Z));Cer(d18:2(4E,14Z)/LTE4)"	55.1794	564.363	194.874	266.027	641.98	299.666	21410.2	23137.5	25257.2	25757.4	5534.17	13798.6	9743.1	337.015	19149.2	0.0176	down	6.12554e-06	0.000108704	3.35944
POS	POS_804.598_4.8286	804.598	4.8286	PC O-39:7	87.41	C47H82NO7P	PC	Phosphatidylcholine					1302.13	311.358	583.626	1089.7	2642.26	794.828	6086.88	3988.79	5274.05	4503.62	325460	5092.32	29760.8	1120.65	58400.9	0.0192	down	0.0169534	0.0515179	2.19923
POS	POS_735.51_4.124	735.51	4.124	DG 44:12	97.6	C47H68O5	DG	Diacylglycerol				"PA(18:0/18:1(12Z)-2OH(9,10));PA(18:1(12Z)-2OH(9,10)/18:0);PA(i-18:0/18:1(12Z)-2OH(9,10));PA(18:1(12Z)-2OH(9,10)/i-18:0);SM(d16:2(4E,8Z)/20:4(6E,8Z,11Z,14Z)+=O(5));SM(d16:2(4E,8Z)/20:4(5Z,8Z,11Z,13E)+=O(15));SM(d16:2(4E,8Z)/20:5(5Z,8Z,11Z,14Z,16E)-OH(18R));SM(d16:2(4E,8Z)/20:5(5Z,8Z,11Z,14Z,16E)-OH(18));SM(d16:2(4E,8Z)/20:5(5Z,8Z,10E,14Z,17Z)-OH(12));SM(d16:2(4E,8Z)/20:5(6E,8Z,11Z,14Z,17Z)-OH(5))…	90.6728	25.3137	170.937	106.636	348.951	80.6311	5272.67	5327.55	4648.39	4863.49	6463.51	5873.21	2772.66	137.19	5408.14	0.0254	down	8.4595e-05	0.000821766	3.28757
POS	POS_734.512_4.4746	734.512	4.4746	PC O-34:7	73.89	C42H72NO7P	PC	Phosphatidylcholine					170.827	593.191	329.866	163.117	580.006	175.412	8431.91	10188.7	7839.46	7872.3	5125.1	13457.6	4577.29	335.403	8819.18	0.038	down	3.47564e-06	7.12775e-05	3.04933
POS	POS_686.511_5.0804	686.511	5.0804	PC O-30:3	70.73	C38H72NO7P	PC	Phosphatidylcholine				"Cer(d20:1/20:3(8Z,11Z,14Z)-2OH(5,6));LysoPC(28:0/0:0)"	932.23	1242.89	687.716	546.497	1329.01	1219.62	27157.1	23139	25409.6	22906.9	5607.6	28682.9	11571.8	992.994	22150.5	0.0448	down	6.35432e-06	0.000111694	2.87518
POS	POS_888.758_7.5643	888.758	7.5643	PC 12:0_31:0	75.72	C51H102NO8P	PC	Phosphatidylcholine	Diacylglycerophosphocholines [GP0101]	Glycerophosphocholines [GP01]	Glycerophospholipids [GP]	Aluminum oleate	37364.3	48746.9	25088	12586.9	70096.5	28486.3	514840	918679	1.02442e+06	964986	902592	602246	429178	37061.5	821294	0.0451	down	5.39564e-06	9.83084e-05	2.96498
POS	POS_768.551_5.3259	768.551	5.3259	"PC(20:4(5Z,8Z,11Z,14Z)/15:0)"	96.76	C43H78NO8P	PC	Phosphatidylcholine	Diacylglycerophosphocholines [GP0101]	Glycerophosphocholines [GP01]	Glycerophospholipids [GP]	"PC(15:0/20:4(5Z,8Z,11Z,14Z));PC(15:0/20:4(8Z,11Z,14Z,17Z));PC(20:4(5Z,8Z,11Z,14Z)/15:0);PC(20:4(8Z,11Z,14Z,17Z)/15:0);PE(16:0/22:4(7Z,10Z,13Z,16Z));PE(16:1(9Z)/20:3(8Z,11Z,14Z));PE(18:0/20:4(5Z,8Z,11Z,14Z));PE(18:0/20:4(8Z,11Z,14Z,17Z));PE(18:1(11Z)/20:3(5Z,8Z,11Z));PE(18:1(11Z)/20:3(8Z,11Z,14Z));PE(18:1(9Z)/20:3(5Z,8Z,11Z));PE(18:1(9Z)/20:3(8Z,11Z,14Z));PE(18:2(9Z,12Z)/20:2(11Z,14Z));PE(18:3(6Z…	14643	15848.1	16060.9	19007.8	14753	16871.1	72156	65047.8	65555.3	60945.3	1.52077e+06	77198.3	163238	16197.3	310279	0.0522	down	0.012932	0.0416609	2.06799
POS	POS_912.758_7.4331	912.758	7.4331	TG 18:2_18:2_18:2;O	100	C57H98O7	OxTG	Oxidized triglyceride					26563	30626.4	18188.7	13267.1	22813.1	26088.7	310940	305152	332859	460775	523592	404345	206267	22924.5	389610	0.0588	down	1.50538e-08	1.47288e-06	2.82324
POS	POS_916.762_7.6741	916.762	7.6741	TG 18:2_18:2_17:1;O2	100	C56H98O8	OxTG	Oxidized triglyceride					7516.95	7909.89	64211.1	3876.73	49240.3	9154.37	312371	325805	330896	314149	685542	246471	196429	23651.6	369206	0.0641	down	0.000573807	0.0036562	2.88138
NEG	NEG_579.389_4.7501	579.389	4.7501	NAGlySer 27:2;O	80	C32H56N2O7	NAGlySer	N-acyl glycyl serine				"beta-Doradecin;Phoenicoxanthin;Papilioerythrinone;DG(10:0/PGE2/0:0);DG(PGE2/10:0/0:0);DG(10:0/0:0/PGE2);DG(PGE2/0:0/10:0);DG(10:0/PGD2/0:0);DG(PGD2/10:0/0:0);DG(10:0/0:0/PGD2);DG(PGD2/0:0/10:0);DG(10:0/20:4(7E,9E,11Z,13E)-3OH(5S,6R,15S)/0:0);DG(20:4(7E,9E,11Z,13E)-3OH(5S,6R,15S)/10:0/0:0);DG(10:0/0:0/20:4(7E,9E,11Z,13E)-3OH(5S,6R,15S));DG(20:4(7E,9E,11Z,13E)-3OH(5S,6R,15S)/0:0/10:0);Verapamil me…	117.632	145.194	212.302	140.843	175.2	174.007	2664.34	2528.41	2383.69	2393.94	2340.33	2030.3	1275.52	160.863	2390.17	0.0673	down	1.7385e-08	1.58711e-06	2.76795
POS	POS_752.535_5.0544	752.535	5.0544	"PC(18:4(6Z,9Z,12Z,15Z)/16:1(9Z))"	70.45	C42H74NO8P	PC	Phosphatidylcholine	Diacylglycerophosphocholines [GP0101]	Glycerophosphocholines [GP01]	Glycerophospholipids [GP]	"SM(d16:2(4E,8Z)/20:4(6E,8Z,11Z,14Z)+=O(5));SM(d16:2(4E,8Z)/20:4(5Z,8Z,11Z,13E)+=O(15));SM(d16:2(4E,8Z)/20:5(5Z,8Z,11Z,14Z,16E)-OH(18R));SM(d16:2(4E,8Z)/20:5(5Z,8Z,11Z,14Z,16E)-OH(18));SM(d16:2(4E,8Z)/20:5(5Z,8Z,10E,14Z,17Z)-OH(12));SM(d16:2(4E,8Z)/20:5(6E,8Z,11Z,14Z,17Z)-OH(5))"	4371.13	3682.54	3697.32	4442.25	4074.45	3833.39	80446.3	62659.6	48840.8	65404.4	11844.7	49420.8	28559.8	4016.85	53102.8	0.0756	down	0.000304513	0.0022186	2.55353
POS	POS_678.561_6.8061	678.561	6.8061	LDGTS 29:0	89.3	C39H77NO6	LDGTS	"Lysodiacylglyceryl trimethylhomoserine/Lysodiacylglyceryl hydroxymethyl-N,N,N-trimethyl-&#946;-alanine"				"DG(18:0/20:3(5Z,8Z,11Z)-O(14R,15S)/0:0);DG(20:3(5Z,8Z,11Z)-O(14R,15S)/18:0/0:0);DG(18:0/0:0/20:3(5Z,8Z,11Z)-O(14R,15S));DG(20:3(5Z,8Z,11Z)-O(14R,15S)/0:0/18:0);DG(18:0/20:3(5Z,8Z,14Z)-O(11S,12R)/0:0);DG(20:3(5Z,8Z,14Z)-O(11S,12R)/18:0/0:0);DG(18:0/0:0/20:3(5Z,8Z,14Z)-O(11S,12R));DG(20:3(5Z,8Z,14Z)-O(11S,12R)/0:0/18:0);DG(18:0/20:3(5Z,11Z,14Z)-O(8,9)/0:0);DG(20:3(5Z,11Z,14Z)-O(8,9)/18:0/0:0);DG(1…	1303.3	1454.79	602.976	947.975	913.539	947.259	12017	14780.6	11372.8	10076.4	17111.7	14373.5	7158.49	1028.31	13288.7	0.0774	down	7.08988e-08	4.2473e-06	2.68535
POS	POS_776.519_5.0615	776.519	5.0615	"PC(18:4(6Z,9Z,12Z,15Z)/18:3(9Z,12Z,15Z))"	70.3	C44H74NO8P	PC	Phosphatidylcholine	Diacylglycerophosphocholines [GP0101]	Glycerophosphocholines [GP01]	Glycerophospholipids [GP]	"PC(14:1(9Z)/22:6(4Z,7Z,10Z,13Z,16Z,19Z));PC(18:3(6Z,9Z,12Z)/18:4(6Z,9Z,12Z,15Z));PC(18:3(9Z,12Z,15Z)/18:4(6Z,9Z,12Z,15Z));PC(18:4(6Z,9Z,12Z,15Z)/18:3(6Z,9Z,12Z));PC(18:4(6Z,9Z,12Z,15Z)/18:3(9Z,12Z,15Z));PC(22:6(4Z,7Z,10Z,13Z,16Z,19Z)/14:1(9Z));PE-NMe(16:1(9Z)/22:6(4Z,7Z,10Z,13Z,16Z,19Z));PE-NMe(18:2(9Z,12Z)/20:5(5Z,8Z,11Z,14Z,17Z));PE-NMe(18:3(6Z,9Z,12Z)/20:4(5Z,8Z,11Z,14Z));PE-NMe(18:3(6Z,9Z,12…	3497.5	4906.02	3197.55	3743.76	3812.56	4080.77	65274.7	56594.6	56334.7	54016	4529.13	60809.5	26733.1	3873.03	49593.1	0.0781	down	0.00278508	0.0126527	2.37507
POS	POS_716.635_7.4438	716.635	7.4438	Cer 18:2;O2/27:3;O2	70.1	C45H81NO5	Cer_EOS	Ceramide Esterified omega-hydroxy fatty acid-sphingosine				"Cer(d18:1/26:0);Cer(d18:0/26:1(17Z));CE(22:5(4Z,7Z,10Z,13Z,16Z));CE(22:5(7Z,10Z,13Z,16Z,19Z));cholest-5-en-3beta-yl (7Z,10Z,13Z,16Z,19Z-docosapentaenoate)"	2379.12	3397.78	2854.14	2868.52	4179.71	2782.56	29015.3	39651.1	42003.8	25681.1	64915.7	30850	20881.6	3076.97	38686.2	0.0795	down	2.52725e-07	1.04172e-05	2.63723
POS	POS_777.53_5.0384	777.53	5.0384	DG 47:12	90.2	C50H74O5	DG	Diacylglycerol				"Cavipetin C;7alpha-hydroxy-3-oxochol-4-en-24-oic Acid;PA(18:0/PGF1alpha);PA(PGF1alpha/18:0);PA(i-18:0/PGF1alpha);PA(PGF1alpha/i-18:0);PG(a-17:0/18:1(12Z)-O(9S,10R));PG(18:1(12Z)-O(9S,10R)/a-17:0);PG(a-17:0/18:1(9Z)-O(12,13));PG(18:1(9Z)-O(12,13)/a-17:0);PG(i-17:0/18:1(12Z)-O(9S,10R));PG(18:1(12Z)-O(9S,10R)/i-17:0);PG(i-17:0/18:1(9Z)-O(12,13));PG(18:1(9Z)-O(12,13)/i-17:0);DG(20:0/6 keto-PGF1alpha…	1516.62	3857.7	1075.18	1645.42	2366.64	1864.79	32237.6	25365.5	27539.8	28058.2	7221.58	30956.5	13642.1	2054.39	25229.9	0.0814	down	1.06029e-05	0.000166204	2.57619
POS	POS_743.563_5.2842	743.563	5.2842	"SM(d18:0/18:2(10E,12Z)+=O(9))"	77.14	C41H79N2O7P	SM	Sphingomyelin	Ceramide phosphocholines (sphingomyelins) [SP0301]	Phosphosphingolipids [SP03]	Sphingolipids [SP]	"SM(d18:0/18:2(10E,12Z)+=O(9));SM(d18:0/18:2(9Z,11E)+=O(13));SM(d18:0/18:3(10,12,15)-OH(9));SM(d18:0/18:3(9,11,15)-OH(13));SM(d18:1/18:1(12Z)-O(9S,10R));SM(d18:1/18:1(9Z)-O(12,13));DG(21:0/20:3(6,8,11)-OH(5)/0:0);DG(20:3(6,8,11)-OH(5)/21:0/0:0);DG(21:0/0:0/20:3(6,8,11)-OH(5));DG(20:3(6,8,11)-OH(5)/0:0/21:0);DG(a-21:0/20:3(6,8,11)-OH(5)/0:0);DG(20:3(6,8,11)-OH(5)/a-21:0/0:0);DG(a-21:0/0:0/20:3(6,8…	1060.9	938.824	1404.39	1798.64	2228.14	1743.88	9266.3	8097.35	4084.73	8215.86	58432.9	21772.2	9920.35	1529.13	18311.6	0.0835	down	0.00175844	0.00879286	2.26837
NEG	NEG_564.332_2.0638	564.332	2.0638	"LysoPC(18:2(9Z,12Z)/0:0)"	75.02	C26H50NO7P	lysoPC		Monoacylglycerophosphocholines [GP0105]	Glycerophosphocholines [GP01]	Glycerophospholipids [GP]	"LysoPC(18:2(9Z,12Z)/0:0);LysoPC(0:0/18:2(9Z,12Z));LysoPE(0:0/20:2(11Z,14Z));LysoPE(20:2(11Z,14Z)/0:0);Bardoxolone methyl;PC(17:2(9Z,12Z)/0:0)"	109409	88939.7	105117	121923	103983	128262	1.41295e+06	1.39311e+06	1.21972e+06	1.33401e+06	1.17475e+06	992900	682090	109606	1.25457e+06	0.0874	down	2.01557e-11	2.1774e-08	2.62485
POS	POS_932.784_7.295	932.784	7.295	TG 18:1_18:1_18:2;O2	100	C57H102O8	OxTG	Oxidized triglyceride					6255.1	14583.6	25161	6711.15	13643.4	6122.11	93976	89169.4	150322	110638	166424	207270	74189.6	12079.4	136300	0.0886	down	1.58624e-05	0.000227469	2.60265
POS	POS_930.769_7.0818	930.769	7.0818	TG 18:1_18:2_18:2;O2	100	C57H100O8	OxTG	Oxidized triglyceride					2709.41	6459.54	8737.77	2206.77	4228.89	2998.46	45757.8	53708.7	50694.3	45311	45165.5	59509.7	27290.6	4556.81	50024.5	0.0911	down	5.6339e-05	0.000596204	2.62213
NEG	NEG_826.563_5.5446	826.563	5.5446	PC 18:2_18:2	73.75	C44H80NO8P	PC	Phosphatidylcholine	Diacylglycerophosphocholines [GP0101]	Glycerophosphocholines [GP01]	Glycerophospholipids [GP]	"PE(20:0/20:4(6Z,8E,10E,14Z)-2OH(5S,12R));PE(20:4(6Z,8E,10E,14Z)-2OH(5S,12R)/20:0);PE(20:0/20:4(6E,8Z,11Z,13E)-2OH(5S,15S));PE(20:4(6E,8Z,11Z,13E)-2OH(5S,15S)/20:0);PE(20:0/20:4(8Z,11Z,14Z,17Z)-2OH(5S,6R));PE(20:4(8Z,11Z,14Z,17Z)-2OH(5S,6R)/20:0);PE(20:1(11Z)/20:3(8Z,11Z,14Z)-2OH(5,6));PE(20:3(8Z,11Z,14Z)-2OH(5,6)/20:1(11Z));PC(17:0/20:4(6Z,8E,10E,14Z)-2OH(5S,12R));PC(20:4(6Z,8E,10E,14Z)-2OH(5S,1…	162720	137917	158935	177229	144839	192447	1.83956e+06	1.84668e+06	1.71493e+06	1.84e+06	1.70395e+06	1.52321e+06	953535	162348	1.74472e+06	0.0931	down	9.3327e-11	5.53371e-08	2.59528
POS	POS_752.519_5.1652	752.519	5.1652	"PC(14:1(9Z)/20:4(8Z,11Z,14Z,17Z))"	72.81	C42H74NO8P	PC	Phosphatidylcholine	Diacylglycerophosphocholines [GP0101]	Glycerophosphocholines [GP01]	Glycerophospholipids [GP]	"PC(14:0/20:5(5Z,8Z,11Z,14Z,17Z));PC(14:1(9Z)/20:4(5Z,8Z,11Z,14Z));PC(14:1(9Z)/20:4(8Z,11Z,14Z,17Z));PC(16:1(9Z)/18:4(6Z,9Z,12Z,15Z));PC(18:4(6Z,9Z,12Z,15Z)/16:1(9Z));PC(20:4(5Z,8Z,11Z,14Z)/14:1(9Z));PC(20:4(8Z,11Z,14Z,17Z)/14:1(9Z));PC(20:5(5Z,8Z,11Z,14Z,17Z)/14:0);PE(15:0/22:5(4Z,7Z,10Z,13Z,16Z));PE(15:0/22:5(7Z,10Z,13Z,16Z,19Z));PE(22:5(4Z,7Z,10Z,13Z,16Z)/15:0);PE(22:5(7Z,10Z,13Z,16Z,19Z)/15:0…	5831.36	27681.7	5480.91	6493.66	5291.52	6398.17	136169	112633	121692	111526	34031.5	94706.4	55661.3	9529.55	101793	0.0936	down	2.60453e-05	0.000327644	2.56364
POS	POS_880.583_5.2054	880.583	5.2054	PC 18:5_26:6	86.01	C52H82NO8P	PC	Phosphatidylcholine	Diacylglycerophosphocholines [GP0101]	Glycerophosphocholines [GP01]	Glycerophospholipids [GP]	"PC(22:5(4Z,7Z,10Z,13Z,16Z)/22:6(4Z,7Z,10Z,13Z,16Z,19Z));PC(22:5(7Z,10Z,13Z,16Z,19Z)/22:6(4Z,7Z,10Z,13Z,16Z,19Z));PC(22:6(4Z,7Z,10Z,13Z,16Z,19Z)/22:5(4Z,7Z,10Z,13Z,16Z));PC(22:6(4Z,7Z,10Z,13Z,16Z,19Z)/22:5(7Z,10Z,13Z,16Z,19Z));PE(22:0/20:3(6,8,11)-OH(5));PE(20:3(6,8,11)-OH(5)/22:0);PE(24:0/18:2(10E,12Z)+=O(9));PE(18:2(10E,12Z)+=O(9)/24:0);PE(24:0/18:2(9Z,11E)+=O(13));PE(18:2(9Z,11E)+=O(13)/24:0);…	4455.74	10046.4	5183.68	5660.78	7352.86	5614.79	32933.5	28692.4	28727.2	29968.2	207615	37549	33649.9	6385.7	60914.2	0.1048	down	0.000990655	0.0056019	2.20239
POS	POS_712.525_5.0933	712.525	5.0933	PC O-32:4	72.67	C40H74NO7P	PC	Phosphatidylcholine				PC(14:0/P-16:0);PE(15:0/P-18:0);PC(P-16:0/14:0);PE(P-18:0/15:0);PC(O-14:0/16:1(9Z));PC(O-16:0/14:1(9Z))	1413.31	2176.95	1373.81	1359.38	1322.45	1427.44	22748.4	14091.7	14871.9	18641.6	4216.3	11999.7	7970.25	1512.22	14428.3	0.1048	down	0.000141569	0.00121538	2.3978
POS	POS_629.4_4.5956	629.4	4.5956	DG 36:9	90.4	C39H58O5	DG	Diacylglycerol				"Rhazidigenine Nb-oxide;Ubiquinone 6;Feruloyl-beta-sitosterol;Schottenol 3-ferulate;DG(12:0/20:5(7Z,9Z,11E,13E,17Z)-3OH(5,6,15)/0:0);DG(20:5(7Z,9Z,11E,13E,17Z)-3OH(5,6,15)/12:0/0:0);DG(12:0/0:0/20:5(7Z,9Z,11E,13E,17Z)-3OH(5,6,15));DG(20:5(7Z,9Z,11E,13E,17Z)-3OH(5,6,15)/0:0/12:0);DG(i-12:0/20:5(7Z,9Z,11E,13E,17Z)-3OH(5,6,15)/0:0);DG(20:5(7Z,9Z,11E,13E,17Z)-3OH(5,6,15)/i-12:0/0:0);DG(i-12:0/0:0/20:…	298.156	421.113	351.682	320.936	459.939	584.094	4008.36	3914.83	4383.3	3368.88	1875.97	5060.69	2087.33	405.987	3768.67	0.1077	down	4.40268e-07	1.54046e-05	2.46933
POS	POS_688.526_5.4374	688.526	5.4374	PC(P-16:0/14:1(9Z))	71.18	C38H74NO7P	PC	Phosphatidylcholine	"1Z-alkenyl,2-acylglycerophosphocholines [GP0103]"	Glycerophosphocholines [GP01]	Glycerophospholipids [GP]	PC(14:1(9Z)/P-16:0);PE(15:0/P-18:1(11Z));PE(15:0/P-18:1(9Z));PC(P-16:0/14:1(9Z));PE(P-18:1(11Z)/15:0);PE(P-18:1(9Z)/15:0);PC(O-16:1(9Z)/14:1(9Z))	3255.08	5144.27	3759.34	4159.2	4067.5	4222.26	48900.1	46852.9	25949.5	27517.5	18643.5	55844.7	20693	4101.27	37284.7	0.11	down	2.35324e-05	0.000303243	2.42067
NEG	NEG_564.329_1.6853	564.329	1.6853	"LysoPC(0:0/18:2(9Z,12Z))"	70.18	C26H50NO7P	lysoPC		Monoacylglycerophosphocholines [GP0105]	Glycerophosphocholines [GP01]	Glycerophospholipids [GP]	"LysoPC(18:2(9Z,12Z)/0:0);LysoPC(0:0/18:2(9Z,12Z));LysoPE(0:0/20:2(11Z,14Z));LysoPE(20:2(11Z,14Z)/0:0);Bardoxolone methyl;PC(17:2(9Z,12Z)/0:0)"	30499.5	25066.9	17676.9	33016.4	16568.4	10047.1	177265	173768	190975	209571	236764	188412	109136	22145.9	196126	0.1129	down	3.14368e-05	0.000379098	2.48668
POS	POS_478.291_2.1355	478.291	2.1355	"LysoPE(18:2(9Z,12Z)/0:0)"	71.81	C23H44NO7P	lysoPE		Monoacylglycerophosphoethanolamines [GP0205]	Glycerophosphoethanolamines [GP02]	Glycerophospholipids [GP]	"LysoPE(0:0/18:2(9Z,12Z));LysoPE(18:2(9Z,12Z)/0:0);VAPIPROST;3-Hydroxylinoleoylcarnitine;(9Z,12Z)-6-Hydroxyoctadeca-9,12-dienoylcarnitine;(11E,13Z)-10-Hydroxyoctadeca-11,13-dienoylcarnitine;(12Z,15Z)-10-Hydroxyoctadeca-12,15-dienoylcarnitine;(11E,13E)-9-Hydroxyoctadeca-11,13-dienoylcarnitine;(8E,12Z)-10-Hydroxyoctadeca-8,12-dienoylcarnitine;(9S,10E,12Z)-9-Hydroxyoctadeca-10,12-dienoylcarnitine;1-…	27534.5	26061.6	25225.6	29120	29256.6	28748.6	295737	225355	233217	226442	269731	215923	136029	27657.8	244401	0.1132	down	8.42526e-10	2.07973e-07	2.48054
POS	POS_763.529_5.0419	763.529	5.0419	"SM(d16:1/22:6(5Z,7Z,10Z,13Z,16Z,19Z)-OH(4))"	72.03	C43H75N2O7P	SM	Sphingomyelin	Ceramide phosphocholines (sphingomyelins) [SP0301]	Phosphosphingolipids [SP03]	Sphingolipids [SP]	"Sphinganine 1-phosphate;(2-Amino-3-hydroxyoctadecyl) dihydrogen phosphate;SM(d16:1/20:3(6,8,11)-OH(5));SM(d18:1/18:2(10E,12Z)+=O(9));SM(d18:1/18:2(9Z,11E)+=O(13));SM(d18:1/18:3(10,12,15)-OH(9));SM(d18:1/18:3(9,11,15)-OH(13));SM(d18:2(4E,14Z)/18:1(12Z)-O(9S,10R));SM(d18:2(4E,14Z)/18:1(9Z)-O(12,13));PS(15:0/18:2(9Z,12Z));PS(18:2(9Z,12Z)/15:0);PE(14:0/20:3(8Z,11Z,14Z)-2OH(5,6));PE(20:3(8Z,11Z,14Z)-…	106.673	1665.69	137.598	187.81	734.543	202.744	3461.01	3414.77	4796.96	3674.07	4651.96	6277.58	2442.62	505.843	4379.39	0.1155	down	0.00140909	0.00737605	2.58491
NEG	NEG_828.569_5.5457	828.569	5.5457	PC 36:3	83.83	C44H82NO8P	PC	Phosphatidylcholine	Diacylglycerophosphocholines [GP0101]	Glycerophosphocholines [GP01]	Glycerophospholipids [GP]	"PE(20:0/20:3(8Z,11Z,14Z)-2OH(5,6));PE(20:3(8Z,11Z,14Z)-2OH(5,6)/20:0);PE(22:2(13Z,16Z)/18:1(12Z)-2OH(9,10));PE(18:1(12Z)-2OH(9,10)/22:2(13Z,16Z));PC(17:0/20:3(8Z,11Z,14Z)-2OH(5,6));PC(20:3(8Z,11Z,14Z)-2OH(5,6)/17:0);PC(20:3(5Z,8Z,11Z)/P-18:1(11Z));PC(20:3(5Z,8Z,11Z)/P-18:1(9Z));PC(20:3(8Z,11Z,14Z)/P-18:1(11Z));PC(20:3(8Z,11Z,14Z)/P-18:1(9Z));PC(20:4(5Z,8Z,11Z,14Z)/P-18:0);PC(20:4(8Z,11Z,14Z,17Z)…	24060.6	18945.1	22704.7	25028	20790.5	27074.4	201025	208575	200017	203917	193582	179468	110432	23100.5	197764	0.1168	down	5.47862e-09	7.06687e-07	2.46858
POS	POS_520.339_2.0662	520.339	2.0662	PC(18:2/0:0)	96.25	C26H51N1O7P1	PC	Phosphatidylcholine	Diacylglycerophosphocholines [GP0101]	Glycerophosphocholines [GP01]	Glycerophospholipids [GP]	"LysoPC(18:2(9Z,12Z)/0:0);LysoPC(0:0/18:2(9Z,12Z));N-Nervonoyl Aspartic acid"	3.6163e+06	3.48253e+06	3.67248e+06	3.94794e+06	3.24484e+06	3.84929e+06	3.30756e+07	3.32852e+07	3.00452e+07	3.07826e+07	3.19362e+07	2.46582e+07	1.7133e+07	3.63556e+06	3.06305e+07	0.1187	down	6.56206e-11	4.47723e-08	2.45465
POS	POS_710.527_4.8536	710.527	4.8536	PC O-12:0_20:5	96.4	C40H72NO7P	EtherPC	Ether-linked phosphatidylcholine					765.697	687.349	603.956	652.29	588.601	803.601	7004.36	5979.76	6769.65	6387.08	3693.58	4689.67	3218.8	683.582	5754.02	0.1188	down	1.90381e-07	8.45209e-06	2.43247
POS	POS_518.322_1.7643	518.322	1.7643	"LysoPC(18:3(6Z,9Z,12Z)/0:0)"	80.32	C26H48NO7P	lysoPC		Monoacylglycerophosphocholines [GP0105]	Glycerophosphocholines [GP01]	Glycerophospholipids [GP]	"LysoPC(18:3(6Z,9Z,12Z)/0:0);LysoPC(18:3(9Z,12Z,15Z)/0:0);10-(3,4-Dimethyl-5-pentylfuran-2-yl)decanoylcarnitine;11-(5-Butyl-3,4-dimethylfuran-2-yl)undecanoylcarnitine;12-(3,4-Dimethyl-5-propylfuran-2-yl)dodecanoylcarnitine;13-(3-Methyl-5-propylfuran-2-yl)tridecanoylcarnitine;9-(5-Hexyl-3,4-dimethylfuran-2-yl)nonanoylcarnitine;11-(3-Methyl-5-pentylfuran-2-yl)undecanoylcarnitine;LysoPC(16:0/0:0);Ly…	19717.1	18846.9	18382.5	20420.4	15770.8	20513.8	165154	148682	159509	153017	169269	128486	86480.8	18941.9	154020	0.123	down	5.17973e-12	7.70801e-09	2.43503
POS	POS_492.307_1.9196	492.307	1.9196	LPC 16:2	100	C24H46NO7P	LPC	Lysophophatidylcholine				N-Docosahexaenoyl Tyrosine;Bardoxolone;Amastatin	739.852	847.765	641.474	669.744	887.926	654.48	6859.2	7634.74	5435.35	5396.21	5227.78	4237.09	3269.3	740.207	5798.39	0.1277	down	1.50544e-08	1.47288e-06	2.39678
POS	POS_1043.7_2.46	1043.7	2.46	DGDG O-24:4_19:2	73.52	C58H100O14	DGDG	Digalactosyldiacylglycerol				LysoPC(18:1(9Z)/0:0);LysoPC(18:1(11Z)/0:0);LysoPC(0:0/18:1(9Z));PC(18:1(6Z)/0:0);Mdp-gdp	10628.7	5487.77	8934.04	12048.7	16326.4	13654.3	92445.5	88973	74116.1	69666.7	75067.5	103714	47588.6	11180	83997.2	0.1331	down	8.801e-06	0.00014442	2.38175
POS	POS_870.599_5.1837	870.599	5.1837	PC 13:1_30:8	76.38	C51H84NO8P	PC	Phosphatidylcholine	Diacylglycerophosphocholines [GP0101]	Glycerophosphocholines [GP01]	Glycerophospholipids [GP]	"PE-NMe2(22:4(7Z,10Z,13Z,16Z)/22:5(4Z,7Z,10Z,13Z,16Z));PE-NMe2(22:4(7Z,10Z,13Z,16Z)/22:5(7Z,10Z,13Z,16Z,19Z));PE-NMe2(22:5(4Z,7Z,10Z,13Z,16Z)/22:4(7Z,10Z,13Z,16Z));PE-NMe2(22:5(7Z,10Z,13Z,16Z,19Z)/22:4(7Z,10Z,13Z,16Z));PE(20:5(5Z,8Z,11Z,14Z,17Z)/24:1(15Z));PE(22:0/22:6(4Z,7Z,10Z,13Z,16Z,19Z));PE(22:1(13Z)/22:5(4Z,7Z,10Z,13Z,16Z));PE(22:1(13Z)/22:5(7Z,10Z,13Z,16Z,19Z));PE(22:2(13Z,16Z)/22:4(7Z,10Z…	2632.63	4373.21	2978.87	3042.57	2580.45	2769.71	24297.7	20264	22159.9	20156.5	10781.8	32702	12394.9	3062.91	21727	0.141	down	4.64693e-06	8.81998e-05	2.29677
POS	POS_843.655_4.9402	843.655	4.9402	SM 17:3;2O/28:5	72.67	C50H87N2O6P	SM	Sphingomyelin	Ceramide phosphocholines (sphingomyelins) [SP0301]	Phosphosphingolipids [SP03]	Sphingolipids [SP]	"TG(14:1(9Z)/18:4(6Z,9Z,12Z,15Z)/20:5(5Z,8Z,11Z,14Z,17Z));TG(14:1(9Z)/20:5(5Z,8Z,11Z,14Z,17Z)/18:4(6Z,9Z,12Z,15Z));TG(18:4(6Z,9Z,12Z,15Z)/14:1(9Z)/20:5(5Z,8Z,11Z,14Z,17Z));TG(14:0/14:1(9Z)/22:6(4Z,7Z,10Z,13Z,16Z,19Z));TG(14:0/18:3(6Z,9Z,12Z)/18:4(6Z,9Z,12Z,15Z));TG(14:0/18:3(9Z,12Z,15Z)/18:4(6Z,9Z,12Z,15Z));TG(14:0/18:4(6Z,9Z,12Z,15Z)/18:3(6Z,9Z,12Z));TG(14:0/18:4(6Z,9Z,12Z,15Z)/18:3(9Z,12Z,15Z))…	436.805	15.4985	256.872	350.243	945.899	514.981	2489.71	1989.13	2271.71	2278.4	963.933	7449.29	1663.54	420.05	2907.03	0.1445	down	0.0110332	0.0368063	2.16189
POS	POS_928.753_6.8434	928.753	6.8434	TG 19:0_16:4_19:2;O2	93.1	C57H98O8	OxTG	Oxidized triglyceride					3947.39	5382.56	5477.07	4650.08	3587.36	4935.37	25747.4	25585.5	25499.6	30242.2	26896.9	53333.4	17940.4	4663.3	31217.5	0.1494	down	7.0177e-07	2.17381e-05	2.27716
POS	POS_800.576_4.8205	800.576	4.8205	"PC(18:1(12Z)-O(9S,10R)/18:1(11Z))"	76.51	C44H82NO9P	PC	Phosphatidylcholine	Diacylglycerophosphocholines [GP0101]	Glycerophosphocholines [GP01]	Glycerophospholipids [GP]	"PC(16:0/20:3(6,8,11)-OH(5));PC(20:3(6,8,11)-OH(5)/16:0);PC(18:0/18:2(10E,12Z)+=O(9));PC(18:2(10E,12Z)+=O(9)/18:0);PC(18:0/18:2(9Z,11E)+=O(13));PC(18:2(9Z,11E)+=O(13)/18:0);PC(18:0/18:3(10,12,15)-OH(9));PC(18:3(10,12,15)-OH(9)/18:0);PC(18:0/18:3(9,11,15)-OH(13));PC(18:3(9,11,15)-OH(13)/18:0);PC(18:1(11Z)/18:1(12Z)-O(9S,10R));PC(18:1(12Z)-O(9S,10R)/18:1(11Z));PC(18:1(11Z)/18:1(9Z)-O(12,13));PC(18:…	22462.6	24240.4	16197	12764.8	14978.1	17442	163104	145426	102634	148526	88204.3	73542.5	69126.7	18014.2	120239	0.1498	down	9.40204e-07	2.66995e-05	2.2686
POS	POS_890.77_7.7767	890.77	7.7767	TG 16:0_18:1_18:2;O	100	C55H100O7	OxTG	Oxidized triglyceride					121690	212079	587442	154291	241425	166792	879919	991258	1.87938e+06	1.59879e+06	2.99334e+06	1.35011e+06	931377	247287	1.61547e+06	0.1531	down	6.66883e-05	0.000682798	2.23083
POS	POS_919.729_7.3948	919.729	7.3948	SM 32:2;2O(FA 17:3)	81.89	C54H99N2O7P	SM	Sphingomyelin	Ceramide phosphocholines (sphingomyelins) [SP0301]	Phosphosphingolipids [SP03]	Sphingolipids [SP]		8731.17	9732.39	8154.77	9473.81	8206.35	10727.9	53216.1	60293.9	52398.6	46206.4	69074.9	75196.3	34284.4	9171.06	59397.7	0.1544	down	2.14461e-08	1.83509e-06	2.28523
NEG	NEG_476.277_2.132	476.277	2.132	LPE 18:2	100	C23H44NO7P	LPE	Lysophosphatidylethanolamine	Monoacylglycerophosphoethanolamines [GP0205]	Glycerophosphoethanolamines [GP02]	Glycerophospholipids [GP]	"LysoPE(0:0/18:2(9Z,12Z));LysoPE(18:2(9Z,12Z)/0:0);VAPIPROST;Aglepristone"	15306.1	11727.3	13663.2	16641.7	13090.6	16080.1	103230	100311	91997.3	98414.2	86136.7	76069.4	53555.7	14418.2	92693.1	0.1555	down	2.6483e-10	1.08017e-07	2.29176
POS	POS_782.568_5.5542	782.568	5.5542	"PC(P-16:0/20:4(5E,8Z,12Z,14Z)-OH(11R))"	98.04	C44H80NO8P	PC	Phosphatidylcholine	Diacylglycerophosphocholines [GP0101]	Glycerophosphocholines [GP01]	Glycerophospholipids [GP]	"PC(14:0/22:4(7Z,10Z,13Z,16Z));PC(16:0/20:4(5Z,8Z,11Z,14Z));PC(16:0/20:4(8Z,11Z,14Z,17Z));PC(16:1(9Z)/20:3(5Z,8Z,11Z));PC(16:1(9Z)/20:3(8Z,11Z,14Z));PC(18:0/18:4(6Z,9Z,12Z,15Z));PC(18:1(11Z)/18:3(6Z,9Z,12Z));PC(18:1(11Z)/18:3(9Z,12Z,15Z));PC(18:1(9Z)/18:3(6Z,9Z,12Z));PC(18:1(9Z)/18:3(9Z,12Z,15Z));PC(18:2(9Z,12Z)/18:2(9Z,12Z));PC(18:3(6Z,9Z,12Z)/18:1(11Z));PC(18:3(6Z,9Z,12Z)/18:1(9Z));PC(18:3(9Z,1…	5.52673e+06	6.28724e+06	5.71732e+06	5.93643e+06	4.93609e+06	5.99004e+06	4.34701e+07	3.99275e+07	3.90936e+07	3.86181e+07	2.70321e+07	3.25568e+07	2.12577e+07	5.73231e+06	3.6783e+07	0.1558	down	4.15529e-08	2.91963e-06	2.2823
POS	POS_660.493_4.7722	660.493	4.7722	PC 28:2e	70.4	C36H70NO7P	PC	Phosphatidylcholine	Diacylglycerophosphocholines [GP0101]	Glycerophosphocholines [GP01]	Glycerophospholipids [GP]	"Acidissiminin;Cer(d18:0/20:3(8Z,11Z,14Z)-2OH(5,6));Cer(t18:0/20:3(6,8,11)-OH(5))"	882.664	1294.49	1317.19	1118	1122.07	687.154	8060.44	6158.74	6587.68	6259.35	4726.61	9186.7	3950.09	1070.26	6829.92	0.1567	down	1.14624e-07	5.86166e-06	2.26548
NEG	NEG_824.614_6.6029	824.614	6.6029	CL 18:0_18:0_28:0_22:5	92.7	C95H176O17P2	CL	Cardiolipin				"PE(18:2(9Z,12Z)/24:1(15Z));PE(18:3(6Z,9Z,12Z)/24:0);PE(18:3(9Z,12Z,15Z)/24:0);PE(20:1(11Z)/22:2(13Z,16Z));PE(20:2(11Z,14Z)/22:1(13Z));PE(20:3(5Z,8Z,11Z)/22:0);PE(20:3(8Z,11Z,14Z)/22:0);PE(22:0/20:3(5Z,8Z,11Z));PE(22:0/20:3(8Z,11Z,14Z));PE(22:1(13Z)/20:2(11Z,14Z));PE(22:2(13Z,16Z)/20:1(11Z));PE(24:0/18:3(6Z,9Z,12Z));PE(24:0/18:3(9Z,12Z,15Z));PE(24:1(15Z)/18:2(9Z,12Z));PE-NMe2(18:1(11Z)/22:2(13Z,1…	8080.31	5235.21	5079.14	5179.87	6091.06	8985.77	38853.4	40003.9	40849.3	40616.3	39412.1	34878.2	22772	6441.89	39102.2	0.1647	down	4.44943e-06	8.55789e-05	2.26079
POS	POS_682.608_7.9182	682.608	7.9182	Cer 20:3;O2/23:0	100	C43H81NO3	Cer_NS	Ceramide non-hydroxyfatty acid-sphingosine					30009.2	78291.5	27707.9	32427.4	33667.7	29289.9	117399	263963	196143	163855	412837	247057	136054	38565.6	233542	0.1651	down	2.03523e-05	0.000273124	2.17147
POS	POS_540.364_1.3492	540.364	1.3492	SL 30:4;O	70.2	C30H53NO5S	SL	Sulfonolipid				Chenodeoxycholylphenylalanine;Deoxycholylphenylalanine;PA(10:0/13:0);PA(8:0/15:0);PA(10:0/a-13:0);PA(10:0/i-13:0);PA(8:0/a-15:0);PA(8:0/i-15:0);Cholylasparagine	2362.29	1691.64	1524.68	1707.41	1539.76	1638.89	16346.7	8549.11	9456.78	8303.29	9432.03	10624.7	6098.1	1744.11	10452.1	0.1669	down	2.29216e-07	9.64753e-06	2.21906
POS	POS_891.698_7.2057	891.698	7.2057	SM 31:2;2O(FA 16:3)	72.56	C52H95N2O7P	SM	Sphingomyelin	Ceramide phosphocholines (sphingomyelins) [SP0301]	Phosphosphingolipids [SP03]	Sphingolipids [SP]	1-O-(6-Acetamido-6-deoxy-alpha-D-galactosyl)-N-[(15Z)-tetracos-15-enoyl]phytosphingosine	949.017	1067.81	600.705	658.012	827.427	723.56	2015.07	2457.97	5345.33	3912.95	2244.06	11930.8	2727.73	804.422	4651.03	0.173	down	0.00168443	0.00851145	1.95567
POS	POS_714.541_5.4811	714.541	5.4811	PC(14:1(9Z)/P-18:1(9Z))	86.13	C40H76NO7P	PC	Phosphatidylcholine	Diacylglycerophosphocholines [GP0101]	Glycerophosphocholines [GP01]	Glycerophospholipids [GP]	PC(14:1(9Z)/P-18:1(11Z));PC(14:1(9Z)/P-18:1(9Z));PC(P-18:1(11Z)/14:1(9Z));PC(P-18:1(9Z)/14:1(9Z));PC(O-14:0/16:0)	4696.99	8314.69	5914.93	6292.12	4801.23	4805.56	29500	40945.7	27490.2	27620.5	16709.3	58366.3	19621.5	5804.25	33438.7	0.1736	down	3.21438e-05	0.000384761	2.13104
POS	POS_802.591_4.7348	802.591	4.7348	"PC(18:1(12Z)-O(9S,10R)/18:0)"	70.67	C44H84NO9P	PC	Phosphatidylcholine	Diacylglycerophosphocholines [GP0101]	Glycerophosphocholines [GP01]	Glycerophospholipids [GP]	"PC(18:0/18:1(12Z)-O(9S,10R));PC(18:1(12Z)-O(9S,10R)/18:0);PC(18:0/18:1(9Z)-O(12,13));PC(18:1(9Z)-O(12,13)/18:0);PC(P-18:1(11Z)/18:1(12Z)-2OH(9,10));PC(18:1(12Z)-2OH(9,10)/P-18:1(11Z));PC(P-18:1(9Z)/18:1(12Z)-2OH(9,10));PC(18:1(12Z)-2OH(9,10)/P-18:1(9Z));3-methoxy-4-hydroxy-5-all-trans-nonaprenylbenzoate;PA(21:0/20:3(6,8,11)-OH(5));PA(20:3(6,8,11)-OH(5)/21:0);PA(a-21:0/20:3(6,8,11)-OH(5));PA(20:3…	6656.03	10908.3	5819.68	5948.18	5588.41	6785.24	45339.5	34222.6	35713.6	32763.2	33800.6	49636.7	22765.2	6950.98	38579.4	0.1802	down	2.01508e-07	8.84491e-06	2.1883
POS	POS_890.737_7.6779	890.737	7.6779	TG 18:1_18:4_18:4	100	C57H92O6	TG	Triacylglycerol					92266.6	135563	199685	101293	93775.8	109409	548587	563466	678689	589686	1.09514e+06	496480	392004	121999	662009	0.1843	down	1.45085e-06	3.69512e-05	2.14254
POS	POS_894.6_5.0382	894.6	5.0382	PC 45:11	85.3	C53H84NO8P	PC	Phosphatidylcholine				"Dioleoylphosphatidyl-ddc;PC(20:0/20:3(6,8,11)-OH(5));PC(20:3(6,8,11)-OH(5)/20:0);PC(22:0/18:2(10E,12Z)+=O(9));PC(18:2(10E,12Z)+=O(9)/22:0);PC(22:0/18:2(9Z,11E)+=O(13));PC(18:2(9Z,11E)+=O(13)/22:0);PC(22:0/18:3(10,12,15)-OH(9));PC(18:3(10,12,15)-OH(9)/22:0);PC(22:0/18:3(9,11,15)-OH(13));PC(18:3(9,11,15)-OH(13)/22:0);PC(22:1(13Z)/18:1(12Z)-O(9S,10R));PC(18:1(12Z)-O(9S,10R)/22:1(13Z));PC(22:1(13Z)/…	941.616	1062.03	758.753	856.516	1096.01	966.713	4870.07	5259.53	5577.88	4585.7	2001.33	7937.49	2992.8	946.94	5038.67	0.1879	down	0.000192182	0.00154599	2.06456
POS	POS_1004.74_2.4017	1004.74	2.4017	PC O-54:12	77.05	C62H102NO7P	PC	Phosphatidylcholine					443.508	49.049	185.269	88.4744	49.8731	152.996	1692.61	838.45	780.556	362.732	854.21	614.175	509.325	161.528	857.122	0.1885	down	0.00158355	0.00809699	2.09975
POS	POS_1017.69_2.4451	1017.69	2.4451	DGDG O-24:5_17:0	74.75	C56H98O14	DGDG	Digalactosyldiacylglycerol				Contignasterol;Dodecaprenyl diphosphate	52779.3	30957.7	45903.6	60768.6	56479.7	67882.8	323425	265743	243129	239396	229947	356094	164375	52462	276289	0.1899	down	8.98975e-07	2.58454e-05	2.14908
POS	POS_895.729_7.4965	895.729	7.4965	SM 30:1;2O(FA 17:2)	78.62	C52H99N2O7P	SM	Sphingomyelin	Ceramide phosphocholines (sphingomyelins) [SP0301]	Phosphosphingolipids [SP03]	Sphingolipids [SP]	"PC(O-22:2(13Z,16Z)/22:3(10Z,13Z,16Z))"	16218.9	17721.7	20172.4	18143.5	15283.9	18831.4	86593.1	79868.6	89199.7	84739.3	122146	78594	53959.4	17728.6	90190.2	0.1966	down	1.64931e-08	1.55537e-06	2.13214
POS	POS_824.57_2.9901	824.57	2.9901	"PC(18:0/20:4(5Z,8Z,11Z,13E)+=O(15))"	70.28	C46H82NO9P	PC	Phosphatidylcholine	Diacylglycerophosphocholines [GP0101]	Glycerophosphocholines [GP01]	Glycerophospholipids [GP]	"PC(18:0/18:1(12Z)-O(9S,10R));PC(18:1(12Z)-O(9S,10R)/18:0);PC(18:0/18:1(9Z)-O(12,13));PC(18:1(9Z)-O(12,13)/18:0);PC(P-18:1(11Z)/18:1(12Z)-2OH(9,10));PC(18:1(12Z)-2OH(9,10)/P-18:1(11Z));PC(P-18:1(9Z)/18:1(12Z)-2OH(9,10));PC(18:1(12Z)-2OH(9,10)/P-18:1(9Z));Inhibitor CC;PG(18:1(11Z)/18:1(12Z)-2OH(9,10));PG(18:1(12Z)-2OH(9,10)/18:1(11Z));PG(18:1(9Z)/18:1(12Z)-2OH(9,10));PG(18:1(12Z)-2OH(9,10)/18:1(9Z…	584.471	699.217	494.299	583.734	418.156	515.695	3522.95	3001.85	2736.3	2084.84	1869.03	3360.3	1655.9	549.262	2762.54	0.1988	down	6.21131e-07	1.97838e-05	2.10065
NEG	NEG_509.329_4.0389	509.329	4.0389	LPG O-19:1	100	C25H51O8P	EtherLPG	Ether-linked lysophosphatidylglycerol				Ganodermic acid TQ;Cymegesolate	1718.61	1451.74	1581.52	1910.31	1580.61	2062.16	9724.98	8725.75	7949.55	8898.68	8054.88	7377.75	5086.38	1717.49	8455.27	0.2031	down	1.28554e-09	2.64525e-07	2.12062
NEG	NEG_728.557_6.6423	728.557	6.6423	PC(15:0/P-18:1(11Z))	70.47	C41H80NO7P	PC	Phosphatidylcholine	Diacylglycerophosphocholines [GP0101]	Glycerophosphocholines [GP01]	Glycerophospholipids [GP]	PC(15:0/P-18:1(11Z));PC(15:0/P-18:1(9Z));PE(18:0/P-18:1(11Z));PE(18:0/P-18:1(9Z));PE(18:1(11Z)/P-18:0);PE(18:1(9Z)/P-18:0);PE(20:1(11Z)/P-16:0);PC(P-18:1(11Z)/15:0);PC(P-18:1(9Z)/15:0);PE(P-16:0/20:1(11Z));PE(P-18:0/18:1(11Z));PE(P-18:0/18:1(9Z));PE(P-18:1(11Z)/18:0);PE(P-18:1(9Z)/18:0)	11241.5	8244.42	9522.43	11303.5	9214.91	12494.4	53113.8	50114.7	50482.1	52485.5	48794.5	44491.2	30125.2	10336.9	49913.6	0.2071	down	1.43161e-07	6.84164e-06	2.11054
NEG	NEG_674.511_6.5328	674.511	6.5328	PE O-16:1_16:0	100	C37H74NO7P	EtherPE	Ether-linked phosphatidylethanolamine				PE(14:0/P-18:0);PE(16:0/P-16:0);PE(P-16:0/16:0);PE(P-18:0/14:0);Cer(d18:0/PGF1alpha)	820.839	583.088	811.788	868.013	700.746	920.217	3300.81	3741.09	3742.67	4480.63	3677.49	3559.03	2267.2	784.115	3750.29	0.2091	down	3.1447e-08	2.34964e-06	2.09986
POS	POS_830.568_5.3346	830.568	5.3346	"PC(22:5(7Z,10Z,13Z,16Z,19Z)/18:3(6Z,9Z,12Z))"	96.82	C48H80NO8P	PC	Phosphatidylcholine	Diacylglycerophosphocholines [GP0101]	Glycerophosphocholines [GP01]	Glycerophospholipids [GP]	"PC(18:2(9Z,12Z)/22:6(4Z,7Z,10Z,13Z,16Z,19Z));PC(18:3(6Z,9Z,12Z)/22:5(4Z,7Z,10Z,13Z,16Z));PC(18:3(6Z,9Z,12Z)/22:5(7Z,10Z,13Z,16Z,19Z));PC(18:3(9Z,12Z,15Z)/22:5(4Z,7Z,10Z,13Z,16Z));PC(18:3(9Z,12Z,15Z)/22:5(7Z,10Z,13Z,16Z,19Z));PC(18:4(6Z,9Z,12Z,15Z)/22:4(7Z,10Z,13Z,16Z));PC(20:3(5Z,8Z,11Z)/20:5(5Z,8Z,11Z,14Z,17Z));PC(20:3(8Z,11Z,14Z)/20:5(5Z,8Z,11Z,14Z,17Z));PC(20:4(5Z,8Z,11Z,14Z)/20:4(5Z,8Z,11Z,1…	730267	596572	714048	774755	629630	777662	4.30568e+06	3.68725e+06	3.91974e+06	3.68789e+06	1.49775e+06	3.03538e+06	2.02972e+06	703822	3.35561e+06	0.2097	down	0.000111219	0.00101154	2.01952
POS	POS_518.322_1.0238	518.322	1.0238	LPC 18:3	100	C26H48NO7P	LPC	Lysophophatidylcholine	Monoacylglycerophosphocholines [GP0105]	Glycerophosphocholines [GP01]	Glycerophospholipids [GP]	"LysoPC(18:3(6Z,9Z,12Z)/0:0);LysoPC(18:3(9Z,12Z,15Z)/0:0);10-(3,4-Dimethyl-5-pentylfuran-2-yl)decanoylcarnitine;11-(5-Butyl-3,4-dimethylfuran-2-yl)undecanoylcarnitine;12-(3,4-Dimethyl-5-propylfuran-2-yl)dodecanoylcarnitine;13-(3-Methyl-5-propylfuran-2-yl)tridecanoylcarnitine;9-(5-Hexyl-3,4-dimethylfuran-2-yl)nonanoylcarnitine;11-(3-Methyl-5-pentylfuran-2-yl)undecanoylcarnitine;LysoPC(16:0/0:0);Ly…	1256.41	893.849	1115.87	1348.11	925.855	1215.54	7461.92	5181.32	5469.5	4479.72	5017	4296.9	3221.83	1125.94	5317.73	0.2117	down	5.6564e-08	3.68473e-06	2.07239
POS	POS_538.386_3.3895	538.386	3.3895	LPC 19:0-SN1	89.66	C27H56NO7P	LPC	Lysophophatidylcholine	Monoacylglycerophosphocholines [GP0105]	Glycerophosphocholines [GP01]	Glycerophospholipids [GP]	LysoPE(0:0/22:0);LysoPE(22:0/0:0);2-Hydroxydocosanoylcarnitine;LysoPA(24:1(15Z)/0:0);Chenodeoxycholylglutamine;Deoxycholylglutamine	79430.1	70089.4	78544.6	65084.7	57233.3	84473.5	423639	362369	381176	365379	280902	240444	207397	72476	342318	0.2117	down	1.65582e-07	7.57152e-06	2.06999
POS	POS_542.319_2.0747	542.319	2.0747	LPC 18:2	87.68	C26H50NO7P	LPC	Lysophophatidylcholine	Monoacylglycerophosphocholines [GP0105]	Glycerophosphocholines [GP01]	Glycerophospholipids [GP]	"LysoPC(20:5(5Z,8Z,11Z,14Z,17Z)/0:0);1-Isopropyl-N-((6-methyl-2-oxo-4-propyl-1,2-dihydropyridin-3-yl)methyl)-6-(2-(4-methylpiperazin-1-yl)pyridin-4-yl)-1H-indazole-4-carboxamide;LysoPC(18:2(9Z,12Z)/0:0);LysoPC(0:0/18:2(9Z,12Z));Sucrose laurate;Sucrose monolaurate;Sucrose, 1-laurate"	90225.7	70611.3	81639.3	95600.1	90474.3	96646.1	377062	410166	381997	396026	456660	446174	249440	87532.8	411347	0.2128	down	1.11605e-09	2.47391e-07	2.09103
POS	POS_549.359_2.2277	549.359	2.2277	DG 30:7	89.5	C33H50O5	DG	Diacylglycerol				3-Hydroxytetradecanedioic acid;Manzamine A;3alpha-Acetomethoxy-11alpha-oxo-12-ursen-24-oic acid	1513.44	1739.96	1489.02	2078.91	1644.88	1718.37	9130.71	7169.53	7587.16	8540.86	9335.95	6064.43	4834.44	1697.43	7971.44	0.2129	down	1.44181e-08	1.42679e-06	2.07746
POS	POS_771.571_3.9637	771.571	3.9637	DG 46:8	90.4	C49H80O5	DG	Diacylglycerol				"3-Hydroxy-cis-5-tetradecenoylcarnitine;(6Z)-9-Hydroxytetradec-6-enoylcarnitine;(12E)-10-Hydroxytetradec-12-enoylcarnitine;(3Z)-5-Hydroxytetradec-3-enoylcarnitine;(5E)-8-Hydroxytetradec-5-enoylcarnitine;(2E)-4-Hydroxytetradec-2-enoylcarnitine;3-oxotetradecanoylcarnitine;N-Palmitoyl Glutamic acid;hydroxytetradecenoylcarnitine;SM(d17:1/20:3(8Z,11Z,14Z)-2OH(5,6));SM(d18:0/18:0);DG(22:0/PGE2/0:0);DG(…	1421.34	582.199	1189.6	963.2	2116.43	1696.46	5785.21	5520.58	5332.44	5561.81	7035.12	7588.71	3732.76	1328.2	6137.31	0.2164	down	0.00017522	0.00143855	2.05986
POS	POS_879.736_7.359	879.736	7.359	SM 30:2;2O/17:2	71.84	C52H99N2O6P	SM	Sphingomyelin	Ceramide phosphocholines (sphingomyelins) [SP0301]	Phosphosphingolipids [SP03]	Sphingolipids [SP]		11404.3	5223.97	9863.93	13148.8	10840.2	13458.6	32102.4	36368.5	32942.7	31793.7	65246.1	96545.8	29911.6	10656.6	49166.5	0.2167	down	0.000146918	0.00125208	1.92884
POS	POS_1021.86_7.9184	1021.86	7.9184	SM 30:3;O2(FA 26:0)	100	C61H117N2O7P	ASM	Acylsphingomyelin				"DG(14:0/14:1(9Z)/0:0);DG(14:1(9Z)/14:0/0:0);DG(14:0/0:0/14:1n5);TG(15:0/24:1(15Z)/22:2(13Z,16Z));TG(15:0/22:2(13Z,16Z)/24:1(15Z));TG(24:1(15Z)/15:0/22:2(13Z,16Z))"	1334.04	1691.67	1661.64	331.689	6778.78	968.152	13069.5	12326.5	7839.87	7433.2	9459.6	8608.61	5958.61	2127.66	9789.55	0.2173	down	0.00420914	0.0174776	2.11706
POS	POS_786.593_9.8491	786.593	9.8491	"PC(18:2(9Z,12Z)/18:0)"	81.05	C44H84NO8P	PC	Phosphatidylcholine	Diacylglycerophosphocholines [GP0101]	Glycerophosphocholines [GP01]	Glycerophospholipids [GP]	"PC(18:1(9Z)/18:1(9Z));PC(14:0/22:2(13Z,16Z));PC(14:1(9Z)/22:1(13Z));PC(16:0/20:2(11Z,14Z));PC(16:1(9Z)/20:1(11Z));PC(18:0/18:2(9Z,12Z));PC(18:1(11Z)/18:1(11Z));PC(18:1(11Z)/18:1(9Z));PC(18:1(9Z)/18:1(11Z));PC(18:2(9Z,12Z)/18:0);PC(20:1(11Z)/16:1(9Z));PC(20:2(11Z,14Z)/16:0);PC(22:1(13Z)/14:1(9Z));PC(22:2(13Z,16Z)/14:0);PE-NMe(14:1(9Z)/24:1(15Z));PE-NMe(16:0/22:2(13Z,16Z));PE-NMe(16:1(9Z)/22:1(13Z…	21154.3	25583.5	20254.4	25480.2	22195.4	23813.8	109674	83279.3	100896	100676	136089	103028	64343.6	23080.3	105607	0.2185	down	2.74582e-08	2.13146e-06	2.06052
POS	POS_806.568_5.4569	806.568	5.4569	"PC(20:3(5Z,8Z,11Z)/18:3(9Z,12Z,15Z))"	97.47	C46H80NO8P	PC	Phosphatidylcholine	Diacylglycerophosphocholines [GP0101]	Glycerophosphocholines [GP01]	Glycerophospholipids [GP]	"LacCer(d18:1/12:0);PC(16:0/22:6(4Z,7Z,10Z,13Z,16Z,19Z));PC(16:1(9Z)/22:5(4Z,7Z,10Z,13Z,16Z));PC(16:1(9Z)/22:5(7Z,10Z,13Z,16Z,19Z));PC(18:1(11Z)/20:5(5Z,8Z,11Z,14Z,17Z));PC(18:1(9Z)/20:5(5Z,8Z,11Z,14Z,17Z));PC(18:2(9Z,12Z)/20:4(5Z,8Z,11Z,14Z));PC(18:2(9Z,12Z)/20:4(8Z,11Z,14Z,17Z));PC(18:3(6Z,9Z,12Z)/20:3(5Z,8Z,11Z));PC(18:3(6Z,9Z,12Z)/20:3(8Z,11Z,14Z));PC(18:3(9Z,12Z,15Z)/20:3(5Z,8Z,11Z));PC(18:3…	4.501e+06	4.15459e+06	4.27367e+06	4.70165e+06	3.72921e+06	4.62617e+06	2.32843e+07	2.15208e+07	2.15094e+07	2.16809e+07	1.40017e+07	1.65006e+07	1.20403e+07	4.33105e+06	1.97496e+07	0.2193	down	8.35633e-07	2.43706e-05	2.05016
POS	POS_906.766_7.2957	906.766	7.2957	TG 16:0_18:1_18:2;O2	100	C55H100O8	OxTG	Oxidized triglyceride					5191.89	47696.2	14617.9	5918.48	13624.5	1223.66	59491.1	58966.7	58801.4	53203.3	101822	68923.4	40790.1	14712.1	66868	0.22	down	0.00906629	0.0317094	2.13435
POS	POS_1047.73_3.0293	1047.73	3.0293	DGDG O-26:2_17:2	76.05	C58H104O14	DGDG	Digalactosyldiacylglycerol				LysoPC(18:0/0:0);LysoPC(0:0/18:0);Platelet-activating factor;2-Lysophosphatidylcholine	223320	141045	172392	214975	326561	245818	1.13836e+06	949206	894765	822827	999443	1.04021e+06	597410	220685	974135	0.2265	down	1.15565e-05	0.00017677	2.03872
POS	POS_896.612_5.2784	896.612	5.2784	PC 13:1_32:9	73.63	C53H86NO8P	PC	Phosphatidylcholine	Diacylglycerophosphocholines [GP0101]	Glycerophosphocholines [GP01]	Glycerophospholipids [GP]	"PC(22:0/18:1(12Z)-O(9S,10R));PC(18:1(12Z)-O(9S,10R)/22:0);PC(22:0/18:1(9Z)-O(12,13));PC(18:1(9Z)-O(12,13)/22:0);PE(22:6(4Z,7Z,10Z,13Z,16Z,19Z)/24:1(15Z));PE(24:1(15Z)/22:6(4Z,7Z,10Z,13Z,16Z,19Z));PE-NMe2(22:1(13Z)/22:6(4Z,7Z,10Z,13Z,16Z,19Z));PE-NMe2(22:2(13Z,16Z)/22:5(4Z,7Z,10Z,13Z,16Z));PE-NMe2(22:2(13Z,16Z)/22:5(7Z,10Z,13Z,16Z,19Z));PE-NMe2(22:5(4Z,7Z,10Z,13Z,16Z)/22:2(13Z,16Z));PE-NMe2(22:5(…	1165.74	4563.31	1404.1	1389.64	1129.91	1142.24	9516.34	9192.08	5051.19	6196.64	2808.78	14884	4870.33	1799.16	7941.5	0.2266	down	0.000916683	0.00526397	1.88373
POS	POS_704.537_4.9521	704.537	4.9521	PC 10:0_20:1	83.33	C38H74NO8P	PC	Phosphatidylcholine	Diacylglycerophosphocholines [GP0101]	Glycerophosphocholines [GP01]	Glycerophospholipids [GP]		104.368	477.004	277.309	57.9807	492.424	68.2474	1091.01	876.292	900.301	939.304	1905.1	760.541	662.49	246.222	1078.76	0.2282	down	0.00497831	0.0199556	2.01677
POS	POS_808.576_5.4511	808.576	5.4511	"PC(22:5(7Z,10Z,13Z,16Z,19Z)/16:0)"	95.17	C46H82NO8P	PC	Phosphatidylcholine	Diacylglycerophosphocholines [GP0101]	Glycerophosphocholines [GP01]	Glycerophospholipids [GP]	"DG(20:0/LTE4/0:0);DG(LTE4/20:0/0:0);DG(20:0/0:0/LTE4);DG(LTE4/0:0/20:0);DG(i-20:0/LTE4/0:0);DG(LTE4/i-20:0/0:0);DG(i-20:0/0:0/LTE4);DG(LTE4/0:0/i-20:0);PC(18:1(9Z)/18:1(9Z));PC(14:0/22:2(13Z,16Z));PC(14:1(9Z)/22:1(13Z));PC(16:0/20:2(11Z,14Z));PC(16:1(9Z)/20:1(11Z));PC(18:0/18:2(9Z,12Z));PC(18:1(11Z)/18:1(11Z));PC(18:1(11Z)/18:1(9Z));PC(18:1(9Z)/18:1(11Z));PC(18:2(9Z,12Z)/18:0);PC(20:1(11Z)/16:1(…	502276	2.25947e+06	587295	572881	489604	536126	2.35891e+06	2.15101e+06	2.1146e+06	2.21745e+06	1.05234e+07	1.88964e+06	2.18356e+06	824609	3.54251e+06	0.2328	down	0.00293982	0.0131642	1.77075
POS	POS_820.514_3.8889	820.514	3.8889	"PC(17:0/20:3(6,8,11)-OH(5))"	72.14	C45H84NO9P	PC	Phosphatidylcholine	Diacylglycerophosphocholines [GP0101]	Glycerophosphocholines [GP01]	Glycerophospholipids [GP]	"PE(18:2(9Z,12Z)/22:6(5Z,8E,10Z,13Z,15E,19Z)-2OH(7S, 17S));PE(22:6(5Z,8E,10Z,13Z,15E,19Z)-2OH(7S, 17S)/18:2(9Z,12Z));PE(18:2(9Z,12Z)/22:6(4Z,7Z,11E,13Z,15E,19Z)-2OH(10S,17));PE(22:6(4Z,7Z,11E,13Z,15E,19Z)-2OH(10S,17)/18:2(9Z,12Z));PE(20:3(5Z,8Z,11Z)/PGJ2);PE(PGJ2/20:3(5Z,8Z,11Z));PE(20:3(8Z,11Z,14Z)/PGJ2);PE(PGJ2/20:3(8Z,11Z,14Z));PE(20:4(5Z,8Z,11Z,14Z)/20:4(6Z,8E,10E,14Z)-2OH(5S,12R));PE(20:4(6Z…	375.108	1231.44	831.788	659.766	697.48	577.241	1355.88	1617.29	1508.05	1748.93	11130.9	1279.87	1917.81	728.804	3106.81	0.2346	down	0.0200109	0.0584194	1.4819
POS	POS_548.37_2.5764	548.37	2.5764	"LysoPC(20:2(11Z,14Z)/0:0)"	95.77	C28H54NO7P	lysoPC		Monoacylglycerophosphocholines [GP0105]	Glycerophosphocholines [GP01]	Glycerophospholipids [GP]	"LysoPC(20:2(11Z,14Z)/0:0)"	86453.8	76755.8	85879.1	94198.9	91498.6	96941	418813	359155	383674	381290	401460	316188	232692	88621.2	376764	0.2352	down	1.52096e-10	7.73213e-08	2.01986
POS	POS_542.323_1.6707	542.323	1.6707	LPC 20:5-SN1	73.59	C28H48NO7P	LPC	Lysophophatidylcholine	Monoacylglycerophosphocholines [GP0105]	Glycerophosphocholines [GP01]	Glycerophospholipids [GP]	"LysoPC(20:5(5Z,8Z,11Z,14Z,17Z)/0:0);1-Isopropyl-N-((6-methyl-2-oxo-4-propyl-1,2-dihydropyridin-3-yl)methyl)-6-(2-(4-methylpiperazin-1-yl)pyridin-4-yl)-1H-indazole-4-carboxamide;LysoPC(18:2(9Z,12Z)/0:0);LysoPC(0:0/18:2(9Z,12Z))"	8604.77	9887.01	6734.99	8112.19	10677.2	8244.53	44985.1	32697.4	35650.4	33009.1	40056	35597.6	22854.7	8710.11	36999.3	0.2354	down	1.93182e-08	1.73911e-06	2.01343
POS	POS_795.64_6.7656	795.64	6.7656	SM 25:1;2O/16:3	91.29	C46H87N2O6P	SM	Sphingomyelin	Ceramide phosphocholines (sphingomyelins) [SP0301]	Phosphosphingolipids [SP03]	Sphingolipids [SP]	"trans-Hexadec-2-enoyl carnitine;O-Palmitoleoylcarnitine;(11Z)-Hexadecenoylcarnitine;(6Z)-Hexadecenoylcarnitine;4-Hexadecenoylcarnitine;7-Hexadecenoylcarnitine;Hexadecenoylcarnitine;TG(14:0/14:0/18:3(6Z,9Z,12Z));TG(14:0/14:0/18:3(9Z,12Z,15Z));TG(14:0/14:1(9Z)/18:2(9Z,12Z));TG(14:0/18:2(9Z,12Z)/14:1(9Z));TG(14:0/18:3(6Z,9Z,12Z)/14:0);TG(14:0/18:3(9Z,12Z,15Z)/14:0);TG(14:1(9Z)/14:0/18:2(9Z,12Z));TG…	125024	178275	136976	141819	190809	139066	689195	600340	652065	618592	711715	553581	394788	151995	637581	0.2384	down	9.19881e-08	5.06364e-06	2.00914
NEG	NEG_824.547_5.3964	824.547	5.3964	PC 16:1_20:4	73.53	C44H78NO8P	PC	Phosphatidylcholine	Diacylglycerophosphocholines [GP0101]	Glycerophosphocholines [GP01]	Glycerophospholipids [GP]	"PE(20:0/PGJ2);PE(PGJ2/20:0);PE(20:1(11Z)/20:4(6Z,8E,10E,14Z)-2OH(5S,12R));PE(20:4(6Z,8E,10E,14Z)-2OH(5S,12R)/20:1(11Z));PE(20:1(11Z)/20:4(6E,8Z,11Z,13E)-2OH(5S,15S));PE(20:4(6E,8Z,11Z,13E)-2OH(5S,15S)/20:1(11Z));PE(20:1(11Z)/20:4(8Z,11Z,14Z,17Z)-2OH(5S,6R));PE(20:4(8Z,11Z,14Z,17Z)-2OH(5S,6R)/20:1(11Z));PE(20:2(11Z,14Z)/20:3(8Z,11Z,14Z)-2OH(5,6));PE(20:3(8Z,11Z,14Z)-2OH(5,6)/20:2(11Z,14Z));PE(22:…	94445.6	79520.1	89511.5	102765	84425.8	108201	416548	411173	378086	418215	384508	328877	241356	93144.7	389568	0.2391	down	9.82287e-10	2.28669e-07	2.0086
POS	POS_703.486_4.9286	703.486	4.9286	SM 17:3;O2/18:5	100	C40H67N2O6P	SM	Sphingomyelin				"Trideca-3,6,9-trienoylcarnitine;Trideca-6,8,10-trienoylcarnitine;Trideca-7,9,11-trienoylcarnitine;Trideca-3,5,7-trienoylcarnitine;Trideca-5,7,9-trienoylcarnitine;(3E,5E,9E)-Trideca-3,5,9-trienoylcarnitine;Trideca-4,6,8-trienoylcarnitine;Trideca-4,7,10-trienoylcarnitine;Trideca-2,5,8-trienoylcarnitine;Trideca-2,4,6-trienoylcarnitine;Trideca-5,8,11-trienoylcarnitine;PA(17:0/18:1(12Z)-O(9S,10R));PA…	181.452	469.39	336.443	403.817	1938.51	485.563	3202.39	2737.33	2567.79	2901.01	2013.97	2517.46	1646.26	635.862	2656.66	0.2393	down	0.00254698	0.0118083	2.04785
POS	POS_494.324_1.9441	494.324	1.9441	LysoPC(16:1(9Z)/0:0)	85.03	C24H48NO7P	lysoPC		Monoacylglycerophosphocholines [GP0105]	Glycerophosphocholines [GP01]	Glycerophospholipids [GP]	"LysoPC(16:1(9Z)/0:0);1-(9Z-Nonadecenoyl)-glycero-3-phosphoethanolamine;(2R)-2-{[(9Z)-Hexadec-9-enoyl]oxy}-3-hydroxypropyl 2-(trimethylazaniumyl)ethyl phosphate;PC(16:1(9E)/0:0);Cervonyl carnitine;(4Z,7Z,10Z,13Z,16Z,19Z)-Docosa-4,7,10,13,16,19-hexaenoylcarnitine"	263959	245365	241676	294159	260767	305160	1.24593e+06	1.07496e+06	1.14993e+06	1.14092e+06	1.17221e+06	941751	694732	268514	1.12095e+06	0.2395	down	1.67809e-10	8.057e-08	2.00708
POS	POS_546.351_2.2187	546.351	2.2187	"LysoPC(20:3(5Z,8Z,11Z)/0:0)"	88.22	C28H52NO7P	lysoPC		Monoacylglycerophosphocholines [GP0105]	Glycerophosphocholines [GP01]	Glycerophospholipids [GP]	"LysoPC(20:3(5Z,8Z,11Z)/0:0);LysoPC(20:3(8Z,11Z,14Z)/0:0);Cholylhistidine;13-(3-Methyl-5-pentylfuran-2-yl)tridecanoylcarnitine;11-(5-Hexyl-3,4-dimethylfuran-2-yl)undecanoylcarnitine;11-(5-Heptyl-3-methylfuran-2-yl)undecanoylcarnitine;12-(3,4-Dimethyl-5-pentylfuran-2-yl)dodecanoylcarnitine;LysoPC(18:0/0:0);LysoPC(0:0/18:0);Platelet-activating factor;2-Lysophosphatidylcholine"	269760	385694	378938	283637	256049	289345	1.36121e+06	1.2135e+06	1.1652e+06	1.17979e+06	1.3228e+06	1.45158e+06	796459	310570	1.28235e+06	0.2422	down	2.65832e-07	1.08369e-05	1.99818
POS	POS_656.592_7.7008	656.592	7.7008	Cer 18:1;O2/23:1	100	C41H79NO3	Cer_NS	Ceramide non-hydroxyfatty acid-sphingosine				"N-(Tricosanoyl)-4E,14Z-sphingadienine"	5012.05	8359.89	6180.6	5937.74	5004.6	5522.14	17847.8	21682.3	25010.2	23382.3	35465	24906.7	15359.3	6002.84	24715.7	0.2429	down	4.76692e-07	1.63691e-05	1.96554
POS	POS_730.569_6.6294	730.569	6.6294	PE O-28:2_8:0	77.46	C41H80NO7P	PE	Phosphatidylethanolamine				PC(15:0/P-18:1(11Z));PC(15:0/P-18:1(9Z));PE(18:0/P-18:1(11Z));PE(18:0/P-18:1(9Z));PE(18:1(11Z)/P-18:0);PE(18:1(9Z)/P-18:0);PE(20:1(11Z)/P-16:0);PC(P-18:1(11Z)/15:0);PC(P-18:1(9Z)/15:0);PE(P-16:0/20:1(11Z));PE(P-18:0/18:1(11Z));PE(P-18:0/18:1(9Z));PE(P-18:1(11Z)/18:0);PE(P-18:1(9Z)/18:0)	44243.9	60834.5	46824.6	48786.8	40279.7	53834.9	182814	168862	183757	161201	242653	273080	125598	49134.1	202061	0.2432	down	3.51207e-07	1.3083e-05	1.96944
POS	POS_560.366_3.3956	560.366	3.3956	LPC 19:0	100	C27H56NO7P	LPC	Lysophophatidylcholine				"Arg-Thr-Lys-Arg;13-(3,4-Dimethyl-5-pentylfuran-2-yl)tridecanoylcarnitine;15-(3,4-Dimethyl-5-propylfuran-2-yl)pentadecanoylcarnitine;LysoPE(0:0/22:0);LysoPE(22:0/0:0)"	3439.15	3382.19	2992	4165.46	4960.58	3650.81	16040.5	13480.5	14667.8	13569.8	14865.8	18613.3	9485.65	3765.03	15206.3	0.2476	down	8.48156e-08	4.86051e-06	1.9773
POS	POS_822.632_5.3551	822.632	5.3551	"PC(22:4(7Z,10Z,13Z,16Z)/P-18:0)"	79.24	C48H88NO7P	PC	Phosphatidylcholine	Diacylglycerophosphocholines [GP0101]	Glycerophosphocholines [GP01]	Glycerophospholipids [GP]	"PC(22:4(7Z,10Z,13Z,16Z)/P-18:0);PC(P-18:0/22:4(7Z,10Z,13Z,16Z));PC(O-20:1(11Z)/20:4(8Z,11Z,14Z,17Z));PC(20:0/P-18:1(11Z));PC(20:0/P-18:1(9Z));PC(20:1(11Z)/P-18:0);PC(22:1(13Z)/P-16:0);PC(P-16:0/22:1(13Z));PC(P-18:0/20:1(11Z));PC(P-18:1(11Z)/20:0);PC(P-18:1(9Z)/20:0);PC(O-18:1(9Z)/20:1(11Z));PC(O-18:2(9Z,12Z)/20:0);SM(d18:0/PGF1alpha)"	3685.5	2913.46	2782.92	3776.64	3154.97	4247.83	6174.64	5438.53	5999.03	5085.8	48358	11557.8	8597.93	3426.89	13769	0.2489	down	0.0378908	0.0962849	1.36355
POS	POS_781.579_4.0577	781.579	4.0577	"SM(d19:1/20:4(5Z,8Z,11Z,14Z)-OH(18R))"	83.15	C44H81N2O7P	SM	Sphingomyelin	Ceramide phosphocholines (sphingomyelins) [SP0301]	Phosphosphingolipids [SP03]	Sphingolipids [SP]	"1-Phenyl-2-decanoylamino-3-morpholino-1-propanol;PA(18:3(6Z,9Z,12Z)/24:1(15Z));PA(18:3(9Z,12Z,15Z)/24:1(15Z));PA(18:4(6Z,9Z,12Z,15Z)/24:0);PA(20:0/22:4(7Z,10Z,13Z,16Z));PA(20:3(5Z,8Z,11Z)/22:1(13Z));PA(20:4(5Z,8Z,11Z,14Z)/22:0);PA(20:4(8Z,11Z,14Z,17Z)/22:0);PA(22:0/20:4(5Z,8Z,11Z,14Z));PA(22:0/20:4(8Z,11Z,14Z,17Z));PA(22:1(13Z)/20:3(5Z,8Z,11Z));PA(22:4(7Z,10Z,13Z,16Z)/20:0);PA(24:0/18:4(6Z,9Z,12…	4044.14	5855.32	4015.99	3710.77	2810.75	4371.68	9626.3	10351.3	12013.1	9715.19	49334	7495.53	10278.7	4134.77	16422.6	0.2518	down	0.00739298	0.0271306	1.59849
POS	POS_798.561_4.4025	798.561	4.4025	PC O-39:10	88.2	C47H76NO7P	EtherPC	Ether-linked phosphatidylcholine				"PC(16:0/20:3(5Z,8Z,11Z)-O(14R,15S));PC(20:3(5Z,8Z,11Z)-O(14R,15S)/16:0);PC(16:0/20:3(5Z,8Z,14Z)-O(11S,12R));PC(20:3(5Z,8Z,14Z)-O(11S,12R)/16:0);PC(16:0/20:3(5Z,11Z,14Z)-O(8,9));PC(20:3(5Z,11Z,14Z)-O(8,9)/16:0);PC(16:0/20:3(8Z,11Z,14Z)-O(5,6));PC(20:3(8Z,11Z,14Z)-O(5,6)/16:0);PC(16:0/20:4(5Z,8Z,11Z,14Z)-OH(20));PC(20:4(5Z,8Z,11Z,14Z)-OH(20)/16:0);PC(16:0/20:4(6E,8Z,11Z,14Z)-OH(5S));PC(20:4(6E,8Z,…	7617.19	17900.4	9026.49	8908.94	8346.52	8539.32	44716.3	42813.7	37725.5	35590.7	45554.5	28995.7	24644.6	10056.5	39232.7	0.2563	down	1.35024e-05	0.00019963	1.94072
POS	POS_844.597_2.8994	844.597	2.8994	"PC(18:0/20:3(8Z,11Z,14Z)-2OH(5,6))"	74.52	C46H86NO10P	PC	Phosphatidylcholine	Diacylglycerophosphocholines [GP0101]	Glycerophosphocholines [GP01]	Glycerophospholipids [GP]		301.811	90.4501	122.073	432.133	507.793	286.059	1351.44	1385.65	1359.27	1366.97	152.904	1114.28	705.903	290.053	1121.75	0.2586	down	0.0168309	0.0512492	1.6045
POS	POS_391.283_3.9009	391.283	3.9009	Cholic acid	70.98	C24H40O5	ST	Sterol Lipids	"C24 bile acids, alcohols, and derivatives [ST0401]"	Bile acids and derivatives [ST04]	Sterols [ST]	"12-Ketodeoxycholic acid;7-Hydroxy-3-oxocholanoic acid;Nutriacholic acid;9'-Carboxy-alpha-chromanol;D8'-Merulinic acid A;12alpha-hydroxy-3-oxo-5beta-cholan-24-oic Acid;3beta,7alpha-Dihydroxychol-5-en-24-oic Acid;3alpha-Hydroxy-7-oxo-5beta-cholanic acid;Antroquinonol;Bis(2-ethylhexyl) phthalate;Bis(2-ethylhexyl) terephthalate;Diisooctyl phthalate;Dioctyl phthalate;3,4-Bis(2-ethylhexyl)phthalic aci…	39951.9	39365.8	59792.4	47179.5	55325	34092.7	212793	194429	212897	192346	100297	139989	110705	45951.2	175458	0.2619	down	9.81838e-06	0.000157234	1.88398
POS	POS_936.757_7.308	936.757	7.308	PC 47:4	78.4	C55H102NO8P	PC	Phosphatidylcholine					12759.4	18240.8	15164.7	14190.3	11120	14338.1	45096.6	36634.9	48374.1	38555.8	68195.3	84142.5	33901	14302.2	53499.9	0.2673	down	4.36034e-05	0.000486675	1.84885
POS	POS_511.342_4.0441	511.342	4.0441	DG 27:5	100	C30H48O5	DG	Diacylglycerol				"Ganodermic acid TQ;Cymegesolate;Pitheduloside I;Arjunolic acid;Camelliagenin B;Madasiatic acid;Esculentic acid (Diplazium);Hovenolactone;Centellasapogenol A;Glyyunnansapogenin B;Euscaphic acid;Ganoderiol D;16beta-Hydroxystellatogenin;21beta-Hydroxyhederagenin;Cimiaserin B;Jacarandic acid;Rotundic acid;4,10,16,22,27,32-Hexaoxa-1,7,13,19-tetraazatricyclo(11.11.5.57,19)tetratriacontane;(8S,9S,10S,1…	693.044	658.296	527.114	751.977	1082.84	715.206	3005.58	3287.77	3108.1	2892.07	2226.45	1944.85	1741.11	738.08	2744.14	0.269	down	1.37042e-06	3.53412e-05	1.89273
NEG	NEG_544.266_1.7285	544.266	1.7285	LPS 20:4	100	C26H44NO9P	LPS	Lysophosphatidylserine				"17-Aminogeldanamycin;Colforsin daropate;LysoPE(0:0/20:5(5Z,8Z,11Z,14Z,17Z));LysoPE(20:5(5Z,8Z,11Z,14Z,17Z)/0:0);Osimertinib;N-(5-((4-(1H-Indol-3-yl)pyrimidin-2-yl)amino)-2-((2-(dimethylamino)ethyl)(methyl)amino)-4-methoxyphenyl)acrylamide;N-[4-Methoxy-5-[[4-(1-methylindol-3-yl)pyrimidin-2-yl]amino]-2-[methyl-[2-(methylamino)ethyl]amino]phenyl]prop-2-enamide"	4152.17	2735.38	3602.46	4422.47	2347.49	4844.96	13844	14659.2	14203.5	15608.8	12268.7	10752.4	8620.13	3684.16	13556.1	0.2718	down	1.55379e-05	0.000223558	1.89884
NEG	NEG_844.605_6.4612	844.605	6.4612	PC 36:2	78.29	C44H84NO8P	PC	Phosphatidylcholine	Diacylglycerophosphocholines [GP0101]	Glycerophosphocholines [GP01]	Glycerophospholipids [GP]	"PS(16:0/24:1(15Z));PS(16:1(9Z)/24:0);PS(18:0/22:1(13Z));PS(18:1(11Z)/22:0);PS(18:1(9Z)/22:0);PS(20:0/20:1(11Z));PS(20:1(11Z)/20:0);PS(22:0/18:1(11Z));PS(22:0/18:1(9Z));PS(22:1(13Z)/18:0);PS(24:0/16:1(9Z));PS(24:1(15Z)/16:0);PC(20:1(11Z)/18:1(12Z)-2OH(9,10));PC(18:1(12Z)-2OH(9,10)/20:1(11Z));PC(P-18:0/PGF1alpha);PC(PGF1alpha/P-18:0);PC(15:0/22:2(13Z,16Z));PC(22:2(13Z,16Z)/15:0);PE(16:1(9Z)/24:1(1…	21230.3	18739.8	21923	21630.4	18574.6	24564.5	73736.8	80085.8	80641.1	83963.5	76857.8	70709.5	49388.1	21110.4	77665.7	0.2718	down	3.59969e-09	5.39475e-07	1.91876
POS	POS_822.597_5.6212	822.597	5.6212	PC 19:2_20:3	72.4	C47H84NO8P	PC	Phosphatidylcholine	Diacylglycerophosphocholines [GP0101]	Glycerophosphocholines [GP01]	Glycerophospholipids [GP]	"PE(18:4(6Z,9Z,12Z,15Z)/24:1(15Z));PE(20:0/22:5(4Z,7Z,10Z,13Z,16Z));PE(20:0/22:5(7Z,10Z,13Z,16Z,19Z));PE(20:1(11Z)/22:4(7Z,10Z,13Z,16Z));PE(20:3(5Z,8Z,11Z)/22:2(13Z,16Z));PE(20:3(8Z,11Z,14Z)/22:2(13Z,16Z));PE(20:4(5Z,8Z,11Z,14Z)/22:1(13Z));PE(20:4(8Z,11Z,14Z,17Z)/22:1(13Z));PE(20:5(5Z,8Z,11Z,14Z,17Z)/22:0);PE(22:0/20:5(5Z,8Z,11Z,14Z,17Z));PE(22:1(13Z)/20:4(5Z,8Z,11Z,14Z));PE(22:1(13Z)/20:4(8Z,11Z…	26599.7	33156.9	24358.6	26757.8	58545.7	26837.9	69466.1	61471.4	64922.7	67348.7	334158	107014	75053.1	32709.4	117397	0.2786	down	0.00718434	0.0265075	1.5441
POS	POS_902.773_7.6584	902.773	7.6584	PC(22:0/22:0)	75.21	C52H104NO8P	PC	Phosphatidylcholine	Diacylglycerophosphocholines [GP0101]	Glycerophosphocholines [GP01]	Glycerophospholipids [GP]		2185.83	4236	29297.2	4681.99	13264.2	2599.84	33307.8	16612.9	34685.8	33453.5	56147.9	26599.5	21422.7	9377.51	33467.9	0.2802	down	0.00787803	0.0284489	1.90499
NEG	NEG_900.576_5.3636	900.576	5.3636	PT 18:1_26:7	95.6	C51H84NO10P	PT	Phosphatidylthreonine				"PE(DiMe(13,5)/22:6(5Z,7Z,10Z,13Z,16Z,19Z)-OH(4));PE(22:6(5Z,7Z,10Z,13Z,16Z,19Z)-OH(4)/DiMe(13,5));PE(DiMe(13,5)/22:6(4Z,8Z,10Z,13Z,16Z,19Z)-OH(7));PE(22:6(4Z,8Z,10Z,13Z,16Z,19Z)-OH(7)/DiMe(13,5));PE(DiMe(13,5)/22:6(4Z,7Z,10Z,12E,16Z,19Z)-OH(14));PE(22:6(4Z,7Z,10Z,12E,16Z,19Z)-OH(14)/DiMe(13,5));PE(DiMe(13,5)/22:6(4Z,7Z,10Z,13E,15E,19Z)-OH(17));PE(22:6(4Z,7Z,10Z,13E,15E,19Z)-OH(17)/DiMe(13,5));PE…	4411.26	3904.74	4354.52	4836.98	4093.55	4972.39	15301.9	15412.6	18740.9	14719.6	13930.5	16024	10058.6	4428.91	15688.2	0.2823	down	7.40546e-10	1.94044e-07	1.88588
POS	POS_858.596_5.6896	858.596	5.6896	PC 20:4_22:4	90.11	C50H84NO8P	PC	Phosphatidylcholine	Diacylglycerophosphocholines [GP0101]	Glycerophosphocholines [GP01]	Glycerophospholipids [GP]	"PC(20:2(11Z,14Z)/22:6(4Z,7Z,10Z,13Z,16Z,19Z));PC(20:3(5Z,8Z,11Z)/22:5(4Z,7Z,10Z,13Z,16Z));PC(20:3(5Z,8Z,11Z)/22:5(7Z,10Z,13Z,16Z,19Z));PC(20:3(8Z,11Z,14Z)/22:5(4Z,7Z,10Z,13Z,16Z));PC(20:3(8Z,11Z,14Z)/22:5(7Z,10Z,13Z,16Z,19Z));PC(20:4(5Z,8Z,11Z,14Z)/22:4(7Z,10Z,13Z,16Z));PC(20:4(8Z,11Z,14Z,17Z)/22:4(7Z,10Z,13Z,16Z));PC(22:4(7Z,10Z,13Z,16Z)/20:4(5Z,8Z,11Z,14Z));PC(22:4(7Z,10Z,13Z,16Z)/20:4(8Z,11Z,…	136420	171142	146817	122917	210073	124285	618034	551646	576398	545316	311426	597697	342681	151942	533420	0.2848	down	4.22196e-06	8.23029e-05	1.83503
POS	POS_770.565_5.7106	770.565	5.7106	PC 19:0_16:3	92.93	C43H80NO8P	PC	Phosphatidylcholine	Diacylglycerophosphocholines [GP0101]	Glycerophosphocholines [GP01]	Glycerophospholipids [GP]	"PC(15:0/20:3(5Z,8Z,11Z));PC(15:0/20:3(8Z,11Z,14Z));PC(20:3(5Z,8Z,11Z)/15:0);PC(20:3(8Z,11Z,14Z)/15:0);PE(16:1(9Z)/22:2(13Z,16Z));PE(18:0/20:3(5Z,8Z,11Z));PE(18:0/20:3(8Z,11Z,14Z));PE(18:1(11Z)/20:2(11Z,14Z));PE(18:1(9Z)/20:2(11Z,14Z));PE(18:2(9Z,12Z)/20:1(11Z));PE(18:3(6Z,9Z,12Z)/20:0);PE(18:3(9Z,12Z,15Z)/20:0);PE(20:0/18:3(6Z,9Z,12Z));PE(20:0/18:3(9Z,12Z,15Z));PE(20:1(11Z)/18:2(9Z,12Z));PE(20:2…	208845	209128	217778	208371	300907	295280	818963	741531	753648	713425	1.3648e+06	644674	539779	240051	839507	0.2859	down	7.07663e-06	0.000122154	1.82211
POS	POS_758.561_9.8336	758.561	9.8336	"PC(18:2(9Z,12Z)/16:0)"	74.56	C42H80NO8P	PC	Phosphatidylcholine	Diacylglycerophosphocholines [GP0101]	Glycerophosphocholines [GP01]	Glycerophospholipids [GP]		17656.6	21752.9	17538.6	24745.1	18546.1	21147.9	116476	52950.7	72777.5	64420.4	70202.5	46737	45412.6	20231.2	70594.1	0.2866	down	6.63274e-05	0.000680249	1.79851
POS	POS_802.591_5.0772	802.591	5.0772	"PC(18:0/18:1(9Z)-O(12,13))"	79.65	C44H84NO9P	PC	Phosphatidylcholine	Diacylglycerophosphocholines [GP0101]	Glycerophosphocholines [GP01]	Glycerophospholipids [GP]	"PC(18:0/18:1(12Z)-O(9S,10R));PC(18:1(12Z)-O(9S,10R)/18:0);PC(18:0/18:1(9Z)-O(12,13));PC(18:1(9Z)-O(12,13)/18:0);PC(P-18:1(11Z)/18:1(12Z)-2OH(9,10));PC(18:1(12Z)-2OH(9,10)/P-18:1(11Z));PC(P-18:1(9Z)/18:1(12Z)-2OH(9,10));PC(18:1(12Z)-2OH(9,10)/P-18:1(9Z));3-methoxy-4-hydroxy-5-all-trans-nonaprenylbenzoate;PA(21:0/20:3(6,8,11)-OH(5));PA(20:3(6,8,11)-OH(5)/21:0);PA(a-21:0/20:3(6,8,11)-OH(5));PA(20:3…	9977.72	5613.75	11418.6	10291.1	10534	10538.3	36447.6	30861.3	39590.9	31756.6	23102	33181.6	21109.5	9728.9	32490	0.2994	down	6.38041e-06	0.000112075	1.81125
POS	POS_808.65_6.9064	808.65	6.9064	HexCer 42:2;O3	74.7	C48H91NO9	HexCer_HS	Hexosylceramide hydroxyfatty acid-sphingosine					83558.5	93724.6	78275	80347.9	190939	74617.2	319913	307268	320527	309610	501058	245838	217140	100244	334036	0.3001	down	6.46361e-05	0.000666595	1.79578
NEG	NEG_520.267_1.7849	520.267	1.7849	LPS 18:2	100	C24H44NO9P	LPS	Lysophosphatidylserine				"LysoPS(18:2(9Z,12Z)/0:0);Batrachotoxinin A 20-alpha-benzoate;LysoPE(0:0/18:3(6Z,9Z,12Z));LysoPE(0:0/18:3(9Z,12Z,15Z));LysoPE(18:3(6Z,9Z,12Z)/0:0);LysoPE(18:3(9Z,12Z,15Z)/0:0);Ulipristal acetate"	3674.18	2428.42	3687.38	4727.08	2675.38	4876.82	12483.9	12439	13034.7	13816.7	11300.6	9854.49	7916.56	3678.21	12154.9	0.3026	down	3.58232e-05	0.000416971	1.81696
NEG	NEG_730.565_6.6259	730.565	6.6259	PC(15:0/P-18:0)	70.42	C41H82NO7P	PC	Phosphatidylcholine	Diacylglycerophosphocholines [GP0101]	Glycerophosphocholines [GP01]	Glycerophospholipids [GP]		1980.77	1658.46	2160.17	1954.84	1861.06	2029.72	6087.82	6492.36	6907.55	6891.4	6254.44	5591.61	4155.85	1940.84	6370.86	0.3046	down	4.07926e-10	1.39099e-07	1.83033
POS	POS_508.41_3.9961	508.41	3.9961	SE 24:1;O4/6:0	94.3	C30H50O5	DCAE	Esterified deoxycholic acid					2242.45	3075.43	2178.44	2350.46	3667.97	2361.36	9078.99	8085.6	7175.55	7174.63	9401.11	10956.7	5645.72	2646.02	8645.43	0.3061	down	1.08527e-06	2.9807e-05	1.80265
POS	POS_542.32_1.2358	542.32	1.2358	PC 20:5e	73.82	C28H48NO7P	PC	Phosphatidylcholine	Diacylglycerophosphocholines [GP0101]	Glycerophosphocholines [GP01]	Glycerophospholipids [GP]	"LysoPC(20:5(5Z,8Z,11Z,14Z,17Z)/0:0);1-Isopropyl-N-((6-methyl-2-oxo-4-propyl-1,2-dihydropyridin-3-yl)methyl)-6-(2-(4-methylpiperazin-1-yl)pyridin-4-yl)-1H-indazole-4-carboxamide;LysoPC(18:2(9Z,12Z)/0:0);LysoPC(0:0/18:2(9Z,12Z));Sucrose laurate;Sucrose monolaurate;Sucrose, 1-laurate"	1742.04	1150.22	1218.75	1271.71	1025.91	1345.72	7909.23	4086.75	4505.83	2993.6	3237.2	2578.89	2755.49	1292.39	4218.58	0.3064	down	0.00042631	0.00289875	1.68868
POS	POS_450.355_2.192	450.355	2.192	CAR 20:3	100	C27H47NO4	CAR	Acylcarnitine				"Icosa-8,11,14-trienoylcarnitine;Icosa-5,8,11-trienoylcarnitine;(11Z,14Z,17Z)-Icosa-11,14,17-trienoylcarnitine;5-Methylheptadecanoylcarnitine;11-Methylheptadecanoylcarnitine;14-Methylheptadecanoylcarnitine;9-Methylheptadecanoylcarnitine;8-Methylheptadecanoylcarnitine;15-Methylheptadecanoylcarnitine;10-Methylheptadecanoylcarnitine;7-Methylheptadecanoylcarnitine;13-Methylheptadecanoylcarnitine;3-Me…	4397.14	3603.51	3956.97	3937.58	7140.24	3945.32	15526.5	13099.2	14142.4	13924.1	15585.6	15728.6	9582.27	4496.79	14667.7	0.3066	down	3.02997e-05	0.000367781	1.81875
POS	POS_799.677_7.1877	799.677	7.1877	SM 33:2;2O/8:0	98.01	C46H91N2O6P	SM	Sphingomyelin	Ceramide phosphocholines (sphingomyelins) [SP0301]	Phosphosphingolipids [SP03]	Sphingolipids [SP]	"L-Palmitoylcarnitine;O-Palmitoylcarnitine;12-Methylpentadecanoylcarnitine;9-Methylpentadecanoylcarnitine;5-Methylpentadecanoylcarnitine;6-Methylpentadecanoylcarnitine;11-Methylpentadecanoylcarnitine;3-Methylpentadecanoylcarnitine;8-Methylpentadecanoylcarnitine;7-Methylpentadecanoylcarnitine;13-Methylpentadecanoylcarnitine;4-Methylpentadecanoylcarnitine;14-Methylpentadecanoylcarnitine;10-Methylpe…	35983.3	45293.9	7949.47	35851.2	34493.4	37292.1	331637	59818.7	64832.4	62607.5	77228.4	41233	69518.3	32810.6	106226	0.3089	down	0.0292044	0.0785356	1.34612
POS	POS_796.545_3.9104	796.545	3.9104	"PC(18:3(9,11,15)-OH(13)/18:2(9Z,12Z))"	70.75	C44H78NO9P	PC	Phosphatidylcholine	Diacylglycerophosphocholines [GP0101]	Glycerophosphocholines [GP01]	Glycerophospholipids [GP]	"Calcium aluminosilicate;PC(16:0/20:4(6E,8Z,11Z,14Z)+=O(5));PC(20:4(6E,8Z,11Z,14Z)+=O(5)/16:0);PC(16:0/20:4(5Z,8Z,11Z,13E)+=O(15));PC(20:4(5Z,8Z,11Z,13E)+=O(15)/16:0);PC(16:0/20:5(5Z,8Z,11Z,14Z,16E)-OH(18R));PC(20:5(5Z,8Z,11Z,14Z,16E)-OH(18R)/16:0);PC(16:0/20:5(5Z,8Z,11Z,14Z,16E)-OH(18));PC(20:5(5Z,8Z,11Z,14Z,16E)-OH(18)/16:0);PC(16:0/20:5(5Z,8Z,10E,14Z,17Z)-OH(12));PC(20:5(5Z,8Z,10E,14Z,17Z)-OH(…	2735.78	6833.9	3569.57	3172.66	5295	3007.43	12775.6	10895.7	11212.6	11078.5	23513.6	9687.75	8648.18	4102.39	13194	0.3109	down	0.000143455	0.00122913	1.72067
POS	POS_869.715_7.4314	869.715	7.4314	SM 45:3;O2	81.1	C50H97N2O7P	SM	Sphingomyelin				"Tris(2-ethylhexyl) phosphate;1-O-(6-Acetamido-6-deoxy-alpha-D-galactosyl)-N-[(15Z)-tetracos-15-enoyl]phytosphingosine;PC(O-22:0/20:4(8Z,11Z,14Z,17Z));PC(O-22:2(13Z,16Z)/20:2(11Z,14Z))"	4283.36	19512.5	18464.6	17585.5	15077.5	19270.8	43692.3	46270.9	50642.8	50130.2	68871.5	40965.5	32897.3	15699.1	50095.5	0.3134	down	0.00263118	0.0121041	1.73192
POS	POS_516.304_1.9483	516.304	1.9483	LPC 16:1	100	C24H48NO7P	LPC	Lysophophatidylcholine	Monoacylglycerophosphocholines [GP0105]	Glycerophosphocholines [GP01]	Glycerophospholipids [GP]	"Tauroursocholic acid;Tauro-b-muricholic acid;LysoPC(18:4(6Z,9Z,12Z,15Z)/0:0);Taurohyocholate;2-[(3alpha,7alpha,12alpha-Trihydroxy-24-oxocholane-24-yl)amino]ethanesulfonic acid;Tauro-alpha-muricholic acid;LysoPC(16:1(9Z)/0:0);1-(9Z-Nonadecenoyl)-glycero-3-phosphoethanolamine;(2R)-2-{[(9Z)-Hexadec-9-enoyl]oxy}-3-hydroxypropyl 2-(trimethylazaniumyl)ethyl phosphate;PC(16:1(9E)/0:0)"	7551.26	6938.61	6727.95	8016.12	9767.66	8187.93	26235	24274.5	21854.8	23586.7	25281.4	27104.9	16293.9	7864.92	24722.9	0.3181	down	8.61645e-08	4.88853e-06	1.79413
POS	POS_904.751_7.0644	904.751	7.0644	TG 16:0_18:2_18:2;O2	100	C55H98O8	OxTG	Oxidized triglyceride					23240.5	36316.9	22083.2	694.606	28898.2	1533.77	48797	43607.7	50354.5	40502.9	70366.2	97698	38674.4	18794.5	58554.4	0.321	down	0.0487273	0.117568	1.79379
POS	POS_877.726_7.1835	877.726	7.1835	SM 47:5;O2	91.8	C52H97N2O6P	SM	Sphingomyelin				"N-Oleoyl Arginine;TG(16:1(9Z)/18:2(9Z,12Z)/20:4(5Z,8Z,11Z,14Z));TG(18:2(9Z,12Z)/16:0/20:5(5Z,8Z,11Z,14Z,17Z));TG(18:2(9Z,12Z)/18:2(9Z,12Z)/18:3(6Z,9Z,12Z));TG(18:2(9Z,12Z)/18:2(9Z,12Z)/18:3(9Z,12Z,15Z));TG(18:3(9Z,12Z,15Z)/18:1(11Z)/18:3(9Z,12Z,15Z));TG(18:3(9Z,12Z,15Z)/18:1(9Z)/18:3(9Z,12Z,15Z));TG(20:4(5Z,8Z,11Z,14Z)/16:0/18:3(9Z,12Z,15Z));TG(14:0/18:1(11Z)/22:6(4Z,7Z,10Z,13Z,16Z,19Z));TG(14:0…	7517.35	9501.13	2350.9	6714.56	6532.71	6335.74	18761.9	17841.9	20824.5	18236	29950.1	14773.3	13278.3	6492.06	20064.6	0.3236	down	0.000896407	0.0051739	1.70366
POS	POS_856.582_5.3633	856.582	5.3633	"PC(22:4(7Z,10Z,13Z,16Z)/20:5(5Z,8Z,11Z,14Z,17Z))"	98.04	C50H82NO8P	PC	Phosphatidylcholine	Diacylglycerophosphocholines [GP0101]	Glycerophosphocholines [GP01]	Glycerophospholipids [GP]	"PC(20:3(5Z,8Z,11Z)/22:6(4Z,7Z,10Z,13Z,16Z,19Z));PC(20:3(8Z,11Z,14Z)/22:6(4Z,7Z,10Z,13Z,16Z,19Z));PC(20:4(5Z,8Z,11Z,14Z)/22:5(4Z,7Z,10Z,13Z,16Z));PC(20:4(5Z,8Z,11Z,14Z)/22:5(7Z,10Z,13Z,16Z,19Z));PC(20:4(8Z,11Z,14Z,17Z)/22:5(4Z,7Z,10Z,13Z,16Z));PC(20:4(8Z,11Z,14Z,17Z)/22:5(7Z,10Z,13Z,16Z,19Z));PC(20:5(5Z,8Z,11Z,14Z,17Z)/22:4(7Z,10Z,13Z,16Z));PC(22:4(7Z,10Z,13Z,16Z)/20:5(5Z,8Z,11Z,14Z,17Z));PC(22:5…	110896	83697	120427	82570.8	161769	123842	436164	363402	376907	373098	192115	368463	232779	113867	351692	0.3238	down	3.41216e-05	0.000402855	1.71166
POS	POS_919.704_8.2819	919.704	8.2819	TG O-16:4_20:5_21:2	100	C60H96O5	EtherTG	Ether-linked triacylglycerol				"Turosteride;PS(20:0/24:1(15Z));PS(20:1(11Z)/24:0);PS(22:0/22:1(13Z));PS(22:1(13Z)/22:0);PS(24:0/20:1(11Z));PS(24:1(15Z)/20:0);PC(24:1(15Z)/18:1(12Z)-2OH(9,10));PC(18:1(12Z)-2OH(9,10)/24:1(15Z))"	1658.29	424.576	1933.87	4464.11	24611.5	5781.51	21289.8	17966.8	18088	22230	12244.2	27921.4	13217.8	6478.97	19956.7	0.3247	down	0.0210413	0.0607638	1.93075
POS	POS_544.335_2.4992	544.335	2.4992	LPC 18:1	100	C26H52NO7P	LPC	Lysophophatidylcholine	Monoacylglycerophosphocholines [GP0105]	Glycerophosphocholines [GP01]	Glycerophospholipids [GP]	"LysoPC(20:4(5Z,8Z,11Z,14Z)/0:0);LysoPC(20:4(8Z,11Z,14Z,17Z)/0:0);LysoPC(0:0/20:4(5Z,8Z,11Z,14Z));Chenodeoxycholylisoleucine;Chenodeoxycholylleucine;Deoxycholylisoleucine;LysoPC(18:1(9Z)/0:0);LysoPC(18:1(11Z)/0:0);LysoPC(0:0/18:1(9Z));PC(18:1(6Z)/0:0);(S)-1-(Sec-Butyl)-N-((4,6-dimethyl-2-oxo-1,2-dihydropyridin-3-yl)methyl)-3-methyl-6-(6-(piperazin-1-yl)pyridin-3-yl)-1H-indole-4-carboxamide"	123116	181370	191929	222065	184109	217622	739340	420577	568006	714371	715250	277554	379609	186702	572517	0.3261	down	0.00039094	0.00270941	1.64685
NEG	NEG_898.56_5.1825	898.56	5.1825	PC 41:10	70.6	C49H78NO8P	PC	Phosphatidylcholine				"PC(20:4(5Z,8Z,11Z,14Z)/22:6(4Z,7Z,10Z,13Z,16Z,19Z));PC(20:4(8Z,11Z,14Z,17Z)/22:6(4Z,7Z,10Z,13Z,16Z,19Z));PC(20:5(5Z,8Z,11Z,14Z,17Z)/22:5(4Z,7Z,10Z,13Z,16Z));PC(20:5(5Z,8Z,11Z,14Z,17Z)/22:5(7Z,10Z,13Z,16Z,19Z));PC(22:5(4Z,7Z,10Z,13Z,16Z)/20:5(5Z,8Z,11Z,14Z,17Z));PC(22:5(7Z,10Z,13Z,16Z,19Z)/20:5(5Z,8Z,11Z,14Z,17Z));PC(22:6(4Z,7Z,10Z,13Z,16Z,19Z)/20:4(5Z,8Z,11Z,14Z));PC(22:6(4Z,7Z,10Z,13Z,16Z,19Z)/…	4051.73	3063.78	3786.73	4241.46	3587.47	4565.85	13035.4	12608.9	11370.9	12503.3	11899.3	9838.98	7879.48	3882.84	11876.1	0.3269	down	5.97406e-08	3.78703e-06	1.76758
POS	POS_854.567_5.1885	854.567	5.1885	"PC(20:5(5Z,8Z,11Z,14Z,17Z)/22:5(4Z,7Z,10Z,13Z,16Z))"	91.25	C50H80NO8P	PC	Phosphatidylcholine	Diacylglycerophosphocholines [GP0101]	Glycerophosphocholines [GP01]	Glycerophospholipids [GP]	"PC(20:4(5Z,8Z,11Z,14Z)/22:6(4Z,7Z,10Z,13Z,16Z,19Z));PC(20:4(8Z,11Z,14Z,17Z)/22:6(4Z,7Z,10Z,13Z,16Z,19Z));PC(20:5(5Z,8Z,11Z,14Z,17Z)/22:5(4Z,7Z,10Z,13Z,16Z));PC(20:5(5Z,8Z,11Z,14Z,17Z)/22:5(7Z,10Z,13Z,16Z,19Z));PC(22:5(4Z,7Z,10Z,13Z,16Z)/20:5(5Z,8Z,11Z,14Z,17Z));PC(22:5(7Z,10Z,13Z,16Z,19Z)/20:5(5Z,8Z,11Z,14Z,17Z));PC(22:6(4Z,7Z,10Z,13Z,16Z,19Z)/20:4(5Z,8Z,11Z,14Z));PC(22:6(4Z,7Z,10Z,13Z,16Z,19Z)/…	95754.4	91640.3	94942.8	108121	90093.7	105709	382752	336024	354388	335184	90789.3	264749	195846	97710.2	293981	0.3324	down	0.00580807	0.0224822	1.53784
POS	POS_544.339_1.995	544.339	1.995	"LysoPC(20:4(8Z,11Z,14Z,17Z)/0:0)"	90.24	C28H50NO7P	lysoPC		Monoacylglycerophosphocholines [GP0105]	Glycerophosphocholines [GP01]	Glycerophospholipids [GP]	"LysoPC(20:4(5Z,8Z,11Z,14Z)/0:0);LysoPC(20:4(8Z,11Z,14Z,17Z)/0:0);LysoPC(0:0/20:4(5Z,8Z,11Z,14Z));Chenodeoxycholylisoleucine;Chenodeoxycholylleucine;Deoxycholylisoleucine;LysoPC(18:1(9Z)/0:0);LysoPC(18:1(11Z)/0:0);LysoPC(0:0/18:1(9Z));PC(18:1(6Z)/0:0);(S)-1-(Sec-Butyl)-N-((4,6-dimethyl-2-oxo-1,2-dihydropyridin-3-yl)methyl)-3-methyl-6-(6-(piperazin-1-yl)pyridin-3-yl)-1H-indole-4-carboxamide"	2.31336e+06	2.32169e+06	2.31075e+06	2.55865e+06	2.2198e+06	2.54997e+06	7.89968e+06	6.85931e+06	7.20832e+06	7.0766e+06	7.70544e+06	6.15213e+06	4.76464e+06	2.37904e+06	7.15025e+06	0.3327	down	2.25314e-09	3.97396e-07	1.75936
POS	POS_787.651_6.6393	787.651	6.6393	SM 37:1;2O/3:0	97.88	C45H91N2O6P	SM	Sphingomyelin	Ceramide phosphocholines (sphingomyelins) [SP0301]	Phosphosphingolipids [SP03]	Sphingolipids [SP]	N-Linoleoyl Isoleucine;N-Linoleoyl Leucine	551318	756806	214889	224879	540080	565585	1.41797e+06	1.32351e+06	1.09195e+06	1.2485e+06	2.47552e+06	928197	944934	475593	1.41427e+06	0.3363	down	0.00184742	0.00915831	1.63069
POS	POS_753.586_5.606	753.586	5.606	SM 22:3;2O/16:1	80.79	C43H81N2O6P	SM	Sphingomyelin	Ceramide phosphocholines (sphingomyelins) [SP0301]	Phosphosphingolipids [SP03]	Sphingolipids [SP]	DG(21:0/6 keto-PGF1alpha/0:0);DG(6 keto-PGF1alpha/21:0/0:0);DG(21:0/0:0/6 keto-PGF1alpha);DG(6 keto-PGF1alpha/0:0/21:0);DG(21:0/TXB2/0:0);DG(TXB2/21:0/0:0);DG(21:0/0:0/TXB2);DG(TXB2/0:0/21:0);DG(a-21:0/6 keto-PGF1alpha/0:0);DG(6 keto-PGF1alpha/a-21:0/0:0);DG(a-21:0/0:0/6 keto-PGF1alpha);DG(6 keto-PGF1alpha/0:0/a-21:0);DG(a-21:0/TXB2/0:0);DG(TXB2/a-21:0/0:0);DG(a-21:0/0:0/TXB2);DG(TXB2/0:0/a-21:0)…	6380.43	1494.95	6231.3	4714.29	26083.6	5511.87	29415.6	30216.4	12496.8	22550.7	24815.8	29641	16629.4	8402.74	24856	0.3381	down	0.0111564	0.0370647	1.7257
POS	POS_510.342_2.187	510.342	2.187	1-heptadecanoyl-sn-glycero-3-phosphocholine	98.39	C25H52NO7P	lysoPC		Monoacylglycerophosphocholines [GP0105]	Glycerophosphocholines [GP01]	Glycerophospholipids [GP]	Cholylthreonine;24(28)-Dehydromakisterone	1153.64	1066.5	1278.78	1521.36	1473.85	1158.81	3973.68	4136.78	3903.99	4036.23	3428.77	3128.78	2521.76	1275.49	3768.04	0.3385	down	8.51312e-08	4.86167e-06	1.73757
POS	POS_775.588_6.0926	775.588	6.0926	SM 20:3;2O/20:4	81.58	C45H79N2O6P	SM	Sphingomyelin	Ceramide phosphocholines (sphingomyelins) [SP0301]	Phosphosphingolipids [SP03]	Sphingolipids [SP]		31954.6	37331.8	35253.8	36561.2	35105.4	38534.9	77879.9	67222.1	78728.8	79816.1	217871	109793	70504.4	35790.3	105218	0.3402	down	0.00227679	0.0108075	1.56351
POS	POS_832.574_5.3291	832.574	5.3291	PC(16:0/PGE1)	89.48	C44H82NO11P	PC	Phosphatidylcholine	Diacylglycerophosphocholines [GP0101]	Glycerophosphocholines [GP01]	Glycerophospholipids [GP]	"PS(20:0/18:1(12Z)-O(9S,10R));PS(18:1(12Z)-O(9S,10R)/20:0);PS(20:0/18:1(9Z)-O(12,13));PS(18:1(9Z)-O(12,13)/20:0);PC(16:0/PGF2alpha);PC(PGF2alpha/16:0);PC(16:0/PGE1);PC(PGE1/16:0);PC(16:0/PGD1);PC(PGD1/16:0);PC(16:1(9Z)/PGF1alpha);PC(PGF1alpha/16:1(9Z));PC(18:0/5-iso PGF2VI);PC(5-iso PGF2VI/18:0);PC(P-16:0/6 keto-PGF1alpha);PC(6 keto-PGF1alpha/P-16:0);PC(P-16:0/TXB2);PC(TXB2/P-16:0);PA(21:0/PGE2);…	237528	100729	236375	175515	252743	161566	680928	598957	616333	563360	336444	618181	381555	194076	569034	0.3411	down	0.000144679	0.00123594	1.67168
NEG	NEG_752.557_6.5458	752.557	6.5458	PE O-18:0_20:4	100	C43H80NO7P	EtherPE	Ether-linked phosphatidylethanolamine				"PE(20:2(11Z,14Z)/P-18:1(11Z));PE(20:2(11Z,14Z)/P-18:1(9Z));PE(20:3(5Z,8Z,11Z)/P-18:0);PE(20:3(8Z,11Z,14Z)/P-18:0);PE(P-18:0/20:3(5Z,8Z,11Z));PE(P-18:0/20:3(8Z,11Z,14Z));PE(P-18:1(11Z)/20:2(11Z,14Z));PE(P-18:1(9Z)/20:2(11Z,14Z))"	67354.1	53850.9	68637.2	68358	54766.2	76873.9	185256	194098	201457	198733	190348	172187	127660	64973.4	190347	0.3413	down	9.2036e-07	2.62567e-05	1.7388
POS	POS_566.416_4.1586	566.416	4.1586	LPC 21:0/0:0	100	C29H60NO7P	LPC	Lysophophatidylcholine				LysoPE(0:0/24:0);LysoPE(24:0/0:0);Behenoyl-arabinofuranosyl-cytosine	2391.76	4290.46	2820.56	3462.2	5857.07	3004.99	11190.7	11782	9042.29	10026.9	9313.98	12482.2	7138.76	3637.84	10639.7	0.3419	down	0.000143177	0.00122716	1.71062
POS	POS_991.671_2.3678	991.671	2.3678	DGDG O-26:4_13:0	73.04	C54H96O14	DGDG	Digalactosyldiacylglycerol				LysoPC(16:0/0:0);LysoPC(0:0/16:0);1-Nonadecanoyl-glycero-3-phosphoethanolamine;1-Palmitoylphosphatidylcholine	291859	153547	204844	315573	345026	358968	1.05264e+06	720479	788238	781070	800309	741900	546204	278303	814106	0.3419	down	0.000187459	0.00151704	1.70281
POS	POS_536.464_4.4851	536.464	4.4851	CAR 26:2	100	C33H61NO4	CAR	Acylcarnitine					2905.47	2631.68	2529.09	2831.5	4306.1	3027.37	9185.49	8100.62	8729.03	8045.25	10091.7	9071.3	5954.55	3038.53	8870.56	0.3425	down	4.6515e-06	8.8222e-05	1.72888
POS	POS_750.503_4.8283	750.503	4.8283	"PC(14:1(9Z)/20:5(5Z,8Z,11Z,14Z,17Z))"	71.69	C42H72NO8P	PC	Phosphatidylcholine	Diacylglycerophosphocholines [GP0101]	Glycerophosphocholines [GP01]	Glycerophospholipids [GP]	"PC(14:1(9Z)/20:5(5Z,8Z,11Z,14Z,17Z));PC(20:5(5Z,8Z,11Z,14Z,17Z)/14:1(9Z));PE(15:0/22:6(4Z,7Z,10Z,13Z,16Z,19Z));PE(22:6(4Z,7Z,10Z,13Z,16Z,19Z)/15:0);PE-NMe(14:0/22:6(4Z,7Z,10Z,13Z,16Z,19Z));PE-NMe(14:1(9Z)/22:5(4Z,7Z,10Z,13Z,16Z));PE-NMe(14:1(9Z)/22:5(7Z,10Z,13Z,16Z,19Z));PE-NMe(16:1(9Z)/20:5(5Z,8Z,11Z,14Z,17Z));PE-NMe(18:2(9Z,12Z)/18:4(6Z,9Z,12Z,15Z));PE-NMe(18:3(6Z,9Z,12Z)/18:3(6Z,9Z,12Z));PE-N…	1906.82	1189.95	2202.34	2667.22	2758.88	2547.87	5948.23	5934.2	7631.27	7954.46	4210.86	6963.3	4326.28	2212.18	6440.39	0.3435	down	7.54151e-05	0.000754937	1.67337
POS	POS_714.55_5.4626	714.55	5.4626	PC(14:1(9Z)/P-18:1(11Z))	83.66	C40H76NO7P	PC	Phosphatidylcholine	Diacylglycerophosphocholines [GP0101]	Glycerophosphocholines [GP01]	Glycerophospholipids [GP]	PC(14:1(9Z)/P-18:1(11Z));PC(14:1(9Z)/P-18:1(9Z));PC(P-18:1(11Z)/14:1(9Z));PC(P-18:1(9Z)/14:1(9Z));Soyacerebroside I;DG(17:0/6 keto-PGF1alpha/0:0);DG(6 keto-PGF1alpha/17:0/0:0);DG(17:0/0:0/6 keto-PGF1alpha);DG(6 keto-PGF1alpha/0:0/17:0);DG(17:0/TXB2/0:0);DG(TXB2/17:0/0:0);DG(17:0/0:0/TXB2);DG(TXB2/0:0/17:0);DG(a-17:0/6 keto-PGF1alpha/0:0);DG(6 keto-PGF1alpha/a-17:0/0:0);DG(a-17:0/0:0/6 keto-PGF1al…	560.783	467.927	84.6317	251.615	1396.94	688.583	1264.45	1205.27	1377.49	486.409	2524.41	3163.31	1122.65	575.08	1670.22	0.3443	down	0.0306538	0.081606	1.4808
POS	POS_781.622_6.5996	781.622	6.5996	SM 24:1;2O/16:3	78.12	C45H85N2O6P	SM	Sphingomyelin	Ceramide phosphocholines (sphingomyelins) [SP0301]	Phosphosphingolipids [SP03]	Sphingolipids [SP]	"SM(d18:0/22:3(10Z,13Z,16Z));SM(d18:1/20:0);SM(d16:1/22:0)"	66759.6	66110.2	78123.7	71156.5	192279	73186.3	254064	297055	270273	252051	211964	303831	178071	91269.2	264873	0.3446	down	0.000636631	0.00396045	1.71005
POS	POS_508.337_2.1967	508.337	2.1967	LPC 17:1-SN1	79.17	C25H50NO7P	LPC	Lysophophatidylcholine	Monoacylglycerophosphocholines [GP0105]	Glycerophosphocholines [GP01]	Glycerophospholipids [GP]	"LysoPE(0:0/20:1(11Z));LysoPE(20:1(11Z)/0:0);(13Z)-3-Hydroxyicos-13-enoylcarnitine;3-Hydroxyicos-11-enoylcarnitine;Isovaleryl-Val-Val-Sta-OEt;1-(13Z,16Z-docosadienoyl)-glycero-3-phosphate;LysoPA(22:2(13Z,16Z)/0:0)"	26795	26108.6	28202.4	29927.6	28855.5	29554.5	91229.9	74395.1	75829.8	77259.9	86338.6	83985.3	54873.5	28240.6	81506.4	0.3465	down	1.26197e-09	2.61752e-07	1.72751
POS	POS_814.568_5.7098	814.568	5.7098	PC(P-16:0/PGD2)	72.05	C44H80NO10P	PC	Phosphatidylcholine	Diacylglycerophosphocholines [GP0101]	Glycerophosphocholines [GP01]	Glycerophospholipids [GP]	"PC(15:0/20:0);PC(20:0/15:0);PE(14:0/24:0);PE(16:0/22:0);PE(18:0/20:0);PE(20:0/18:0);PE(22:0/16:0);PE(24:0/14:0);PE-NMe(15:0/22:0);PE-NMe(22:0/15:0);PE-NMe2(18:0/18:0);PE-NMe2(14:0/22:0);PE-NMe2(16:0/20:0);PE-NMe2(20:0/16:0);PE-NMe2(22:0/14:0);PC(16:0/19:0);Cyanidin 3-O-glucoside;Cyanidin 3-O-rutinoside;Cyanidin 3-O-sambubioside;Cyanidin 3-O-xyloside;dehydrocafestol;Deoxylactucin (8-);Dopamine-be…	2850.71	2105.67	3709.29	2533.06	6607.6	3606.03	7163.03	10993.2	11165.6	11987.4	11396.5	8862.72	6915.07	3568.73	10261.4	0.3478	down	0.00040518	0.00278946	1.67574
POS	POS_892.746_7.7849	892.746	7.7849	"TG(18:3(9Z,12Z,15Z)/18:2(9Z,12Z)/18:3(9Z,12Z,15Z))"	70.53	C57H94O6	TG	Triacylglycerol	Triacylglycerols [GL0301]	Triradylglycerols [GL03]	Glycerolipids [GL]	"TG(18:3(9Z,12Z,15Z)/18:2(9Z,12Z)/18:3(9Z,12Z,15Z));TG(20:4(5Z,8Z,11Z,14Z)/14:0/20:4(5Z,8Z,11Z,14Z));TG(14:0/20:3(5Z,8Z,11Z)/20:5(5Z,8Z,11Z,14Z,17Z));TG(14:0/18:2(9Z,12Z)/22:6(4Z,7Z,10Z,13Z,16Z,19Z));TG(14:0/18:3(6Z,9Z,12Z)/22:5(4Z,7Z,10Z,13Z,16Z));TG(14:0/18:3(6Z,9Z,12Z)/22:5(7Z,10Z,13Z,16Z,19Z));TG(14:0/20:3n6/20:5(5Z,8Z,11Z,14Z,17Z));TG(14:0/20:4(5Z,8Z,11Z,14Z)/20:4(5Z,8Z,11Z,14Z));TG(14:0/20:…	339801	461112	274364	339312	476825	363270	824602	892399	967885	938117	1.5331e+06	1.28227e+06	724422	375781	1.07306e+06	0.3502	down	1.27112e-05	0.000190426	1.65981
POS	POS_794.529_4.9722	794.529	4.9722	"PC(18:3(9Z,12Z,15Z)/18:2(9Z,11E)+=O(13))"	71.68	C44H76NO9P	PC	Phosphatidylcholine	Diacylglycerophosphocholines [GP0101]	Glycerophosphocholines [GP01]	Glycerophospholipids [GP]	"PC(14:0/22:6(5Z,7Z,10Z,13Z,16Z,19Z)-OH(4));PC(22:6(5Z,7Z,10Z,13Z,16Z,19Z)-OH(4)/14:0);PC(14:0/22:6(4Z,8Z,10Z,13Z,16Z,19Z)-OH(7));PC(22:6(4Z,8Z,10Z,13Z,16Z,19Z)-OH(7)/14:0);PC(14:0/22:6(4Z,7Z,10Z,12E,16Z,19Z)-OH(14));PC(22:6(4Z,7Z,10Z,12E,16Z,19Z)-OH(14)/14:0);PC(14:0/22:6(4Z,7Z,10Z,13E,15E,19Z)-OH(17));PC(22:6(4Z,7Z,10Z,13E,15E,19Z)-OH(17)/14:0);PC(14:0/22:5(4Z,7Z,10Z,13Z,19Z)-O(16,17));PC(22:5(…	593.23	479.089	22.7375	707.542	430.969	638.707	1427.54	1878.23	1267.26	920.389	1205.59	1484.05	921.278	478.713	1363.84	0.351	down	0.0481319	0.116475	1.58242
POS	POS_750.488_3.1266	750.488	3.1266	PC 17:2_17:4	93.2	C42H72NO8P	PC	Phosphatidylcholine				"Spirolide F;PA(15:0/PGF2alpha);PA(PGF2alpha/15:0);PA(15:0/PGE1);PA(PGE1/15:0);PA(15:0/PGD1);PA(PGD1/15:0);PA(17:0/5-iso PGF2VI);PA(5-iso PGF2VI/17:0);PA(a-15:0/PGF2alpha);PA(PGF2alpha/a-15:0);PA(a-15:0/PGE1);PA(PGE1/a-15:0);PA(a-15:0/PGD1);PA(PGD1/a-15:0);PA(a-17:0/5-iso PGF2VI);PA(5-iso PGF2VI/a-17:0);PA(i-15:0/PGF2alpha);PA(PGF2alpha/i-15:0);PA(i-15:0/PGE1);PA(PGE1/i-15:0);PA(i-15:0/PGD1);PA(P…	4571.28	5288.83	8431.5	3204.07	9927.44	5366.38	8579.42	13118.2	16805.1	14234	12256	39691.8	11789.5	6131.59	17447.4	0.3514	down	0.00470337	0.0190568	1.46178
POS	POS_580.561_6.8362	580.561	6.8362	Cer 18:1;O2/19:0	90.6	C37H73NO3	Cer_NS	Ceramide non-hydroxyfatty acid-sphingosine					1111.79	2183.08	1852.95	1377.54	2354.18	2063.31	4914.83	3766.57	5251.25	6240.52	6822.17	4096.26	3502.87	1823.81	5181.93	0.352	down	5.30803e-05	0.000568918	1.65143
POS	POS_536.369_2.7555	536.369	2.7555	LPC 19:1	100	C27H54NO7P	LPC	Lysophophatidylcholine				LysoPE(0:0/22:1(13Z));LysoPE(22:1(13Z)/0:0);(16Z)-14-Hydroxydocos-16-enoylcarnitine	15906.3	15319.1	16634	18195.4	22666.9	18939.1	55537.3	47338	49153.7	48704.8	58218.9	46853.8	34455.6	17943.5	50967.7	0.3521	down	2.02029e-07	8.84491e-06	1.7079
POS	POS_542.321_1.029	542.321	1.029	LPC 20:5	100	C28H48NO7P	LPC	Lysophophatidylcholine	Monoacylglycerophosphocholines [GP0105]	Glycerophosphocholines [GP01]	Glycerophospholipids [GP]	"LysoPC(20:5(5Z,8Z,11Z,14Z,17Z)/0:0);1-Isopropyl-N-((6-methyl-2-oxo-4-propyl-1,2-dihydropyridin-3-yl)methyl)-6-(2-(4-methylpiperazin-1-yl)pyridin-4-yl)-1H-indazole-4-carboxamide;LysoPC(18:2(9Z,12Z)/0:0);LysoPC(0:0/18:2(9Z,12Z));Sucrose laurate;Sucrose monolaurate;Sucrose, 1-laurate"	2393.73	1268.1	1940.21	2205.14	4893.32	1857.56	4319.64	7078.09	7290.79	7233.49	7834.73	7416.65	4644.29	2426.34	6862.23	0.3536	down	0.000800199	0.00473238	1.65507
POS	POS_894.75_7.9564	894.75	7.9564	"TG(18:2(9Z,12Z)/18:2(9Z,12Z)/18:3(9Z,12Z,15Z))"	71.61	C57H96O6	TG	Triacylglycerol	Triacylglycerols [GL0301]	Triradylglycerols [GL03]	Glycerolipids [GL]	"TG(16:1(9Z)/18:2(9Z,12Z)/20:4(5Z,8Z,11Z,14Z));TG(18:2(9Z,12Z)/16:0/20:5(5Z,8Z,11Z,14Z,17Z));TG(18:2(9Z,12Z)/18:2(9Z,12Z)/18:3(6Z,9Z,12Z));TG(18:2(9Z,12Z)/18:2(9Z,12Z)/18:3(9Z,12Z,15Z));TG(18:3(9Z,12Z,15Z)/18:1(11Z)/18:3(9Z,12Z,15Z));TG(18:3(9Z,12Z,15Z)/18:1(9Z)/18:3(9Z,12Z,15Z));TG(20:4(5Z,8Z,11Z,14Z)/16:0/18:3(9Z,12Z,15Z));TG(14:0/18:1(11Z)/22:6(4Z,7Z,10Z,13Z,16Z,19Z));TG(14:0/18:1(9Z)/22:6(4Z,…	1.99647e+06	2.78072e+06	1.98525e+06	2.19655e+06	1.80418e+06	2.27137e+06	4.96527e+06	5.68817e+06	6.21621e+06	6.01497e+06	8.54966e+06	4.89254e+06	4.11345e+06	2.17242e+06	6.05447e+06	0.3588	down	3.42258e-06	7.04943e-05	1.65812
NEG	NEG_546.282_1.9425	546.282	1.9425	LPS 20:3	100	C26H46NO9P	LPS	Lysophosphatidylserine					1131.2	843.5	876.742	1342.14	688.232	1278.46	2781.49	2512.2	4150.47	2852.35	2446.88	2378.53	1940.18	1026.71	2853.65	0.3598	down	2.68656e-05	0.000335522	1.64419
POS	POS_636.625_7.4651	636.625	7.4651	Cer(d18:1/23:0)	79.58	C41H81NO3	Cer		N-acylsphingosines (ceramides) [SP0201]	Ceramides [SP02]	Sphingolipids [SP]	Cer(d18:1/23:0);Cyanidin 3-O-(6''-dioxalyl-glucoside)	182832	262424	186536	214853	194576	213492	573773	478632	583981	557668	868469	421588	394902	209119	580685	0.3601	down	2.69437e-05	0.000336174	1.63777
NEG	NEG_807.503_5.333	807.503	5.333	PI 32:1	79.2	C41H77O13P	PI	Sphingolipids				"PI(16:0/16:1(9Z));PI(16:1(9Z)/16:0);PG(a-15:0/PGF1alpha);PG(PGF1alpha/a-15:0);PG(i-15:0/PGF1alpha);PG(PGF1alpha/i-15:0);SM(d16:1/PGF2alpha);SM(d16:1/PGE1);SM(d16:1/PGD1);SM(d16:2(4E,8Z)/PGF1alpha);SM(d18:1/5-iso PGF2VI);7a,12a-Dihydroxy-3-oxo-4-cholenoic acid;Lovastatin;Lucidone C;[(1S,3S,7R,8R,8As)-8-[2-[(4R)-4-hydroxy-6-oxooxan-2-yl]ethyl]-3,7-dimethyl-1,2,3,7,8,8a-hexahydronaphthalen-1-yl] (2…	1783.84	1401.18	1878.17	1807.39	1516.55	2230.47	4978.95	5274	5047.46	5183.77	4800.68	4170.98	3339.45	1769.6	4909.31	0.3605	down	1.48878e-06	3.75849e-05	1.68719
POS	POS_522.355_2.4754	522.355	2.4754	LysoPC(18:1(11Z)/0:0)	95.1	C26H52NO7P	lysoPC		Monoacylglycerophosphocholines [GP0105]	Glycerophosphocholines [GP01]	Glycerophospholipids [GP]	"LysoPC(18:1(9Z)/0:0);LysoPC(18:1(11Z)/0:0);LysoPC(0:0/18:1(9Z));PC(18:1(6Z)/0:0);(6Z,9Z,12Z,15Z,18Z,21Z)-Tetracosa-6,9,12,15,18,21-hexaenoylcarnitine;(7Z,9Z,12Z,15Z,18Z,21Z)-Tetracosa-7,9,12,15,18,21-hexaenoylcarnitine;Dipyridamole"	5.08553e+06	4.56025e+06	5.38567e+06	5.64165e+06	4.93642e+06	5.90247e+06	1.57304e+07	1.46064e+07	1.48066e+07	1.47967e+07	1.54362e+07	1.19977e+07	9.90716e+06	5.252e+06	1.45623e+07	0.3607	down	4.74909e-09	6.44658e-07	1.68946
NEG	NEG_810.6_6.4817	810.6	6.4817	CL 16:0_28:0_18:1_22:4	90.8	C93H172O17P2	CL	Cardiolipin				"PC(16:1(9Z)/22:2(13Z,16Z));PC(18:0/20:3(5Z,8Z,11Z));PC(18:0/20:3(8Z,11Z,14Z));PC(18:1(11Z)/20:2(11Z,14Z));PC(18:1(9Z)/20:2(11Z,14Z));PC(18:2(9Z,12Z)/20:1(11Z));PC(18:3(6Z,9Z,12Z)/20:0);PC(18:3(9Z,12Z,15Z)/20:0);PC(20:0/18:3(6Z,9Z,12Z));PC(20:0/18:3(9Z,12Z,15Z));PC(20:1(11Z)/18:2(9Z,12Z));PC(20:2(11Z,14Z)/18:1(11Z));PC(20:2(11Z,14Z)/18:1(9Z));PC(20:3(5Z,8Z,11Z)/18:0);PC(20:3(8Z,11Z,14Z)/18:0);PC(…	8444.72	7585.47	8846.71	9148.1	7695.61	10474.9	22749.7	24804.7	23896.3	25856.4	24899	22501.8	16408.6	8699.25	24118	0.3607	down	2.74472e-07	1.10198e-05	1.69433
POS	POS_742.535_5.3858	742.535	5.3858	"PC(18:3(6Z,9Z,12Z)/15:0)"	74.99	C41H76NO8P	PC	Phosphatidylcholine	Diacylglycerophosphocholines [GP0101]	Glycerophosphocholines [GP01]	Glycerophospholipids [GP]	"PC(15:0/18:3(6Z,9Z,12Z));PC(15:0/18:3(9Z,12Z,15Z));PC(18:3(6Z,9Z,12Z)/15:0);PC(18:3(9Z,12Z,15Z)/15:0);PE(14:1(9Z)/22:2(13Z,16Z));PE(16:0/20:3(5Z,8Z,11Z));PE(16:0/20:3(8Z,11Z,14Z));PE(16:1(9Z)/20:2(11Z,14Z));PE(18:0/18:3(6Z,9Z,12Z));PE(18:0/18:3(9Z,12Z,15Z));PE(18:1(11Z)/18:2(9Z,12Z));PE(18:1(9Z)/18:2(9Z,12Z));PE(18:2(9Z,12Z)/18:1(11Z));PE(18:2(9Z,12Z)/18:1(9Z));PE(18:3(6Z,9Z,12Z)/18:0);PE(18:3(9…	12188.3	8805.51	11325.4	13171.5	18978.4	13287.7	27831.4	30857	36415.5	28959.5	60986.8	30537.5	24445.4	12959.5	35931.3	0.3607	down	8.95121e-05	0.000857009	1.59998
POS	POS_1039.66_2.447	1039.66	2.447	DGDG O-22:6_21:2	70.26	C58H96O14	DGDG	Digalactosyldiacylglycerol					5078.75	2098.3	4705.8	6922.78	16755.5	5662.9	21735.3	22978.4	16622.3	15744.6	16625.5	19397	12860.6	6870.67	18850.5	0.3645	down	0.00648333	0.0245145	1.64842
POS	POS_618.614_7.4651	618.614	7.4651	Cer 18:1;O2/23:0	100	C41H81NO3	Cer_NS	Ceramide non-hydroxyfatty acid-sphingosine					84392.9	126485	87819.5	100366	95907.2	98716.6	271905	236983	261262	258455	396561	202423	185106	98947.8	271265	0.3648	down	1.05852e-05	0.000166027	1.63571
POS	POS_532.335_2.6898	532.335	2.6898	LPC 17:0	100	C25H52NO7P	LPC	Lysophophatidylcholine				"13-(3,4-Dimethyl-5-propylfuran-2-yl)tridecanoylcarnitine;11-(3,4-Dimethyl-5-pentylfuran-2-yl)undecanoylcarnitine;LysoPE(0:0/20:0);LysoPE(20:0/0:0);LysoPC(17:0/0:0)"	10898.6	9339.96	11167	13497.5	15887.2	13840.5	36176.7	30449.4	31559.9	31962.4	38875.7	34243.1	23158.1	12438.4	33877.8	0.3672	down	6.7206e-06	0.000117258	1.66645
POS	POS_803.649_6.8299	803.649	6.8299	SM 40:1;3O	83.18	C45H91N2O7P	SM	Sphingomyelin	Ceramide phosphocholines (sphingomyelins) [SP0301]	Phosphosphingolipids [SP03]	Sphingolipids [SP]	PA(21:0/22:0);PA(22:0/21:0);PA(19:0/i-24:0);PA(21:0/i-22:0);PA(22:0/a-21:0);PA(22:0/i-21:0);PA(a-21:0/22:0);PA(a-21:0/i-22:0);PA(a-25:0/18:0);PA(a-25:0/i-18:0);PA(i-19:0/i-24:0);PA(i-21:0/22:0);PA(i-21:0/i-22:0);PA(i-22:0/21:0);PA(i-22:0/a-21:0);PA(i-22:0/i-21:0);PA(i-24:0/19:0);PA(i-24:0/i-19:0);TG(14:0/15:0/16:0);TG(14:0/16:0/15:0);TG(15:0/14:0/16:0);TG(15:0/15:0/15:0);TG(i-20:0/13:0/12:0);TG(i…	29996.6	54426.9	10532.4	12221.9	111771	35740.5	122877	108590	90354.4	111918	74755	184392	78964.7	42448.2	115481	0.3676	down	0.0154006	0.047871	1.62497
POS	POS_754.568_6.5412	754.568	6.5412	PE O-18:4_20:0	74.52	C43H80NO7P	PE	Phosphatidylethanolamine				"PE(20:2(11Z,14Z)/P-18:1(11Z));PE(20:2(11Z,14Z)/P-18:1(9Z));PE(20:3(5Z,8Z,11Z)/P-18:0);PE(20:3(8Z,11Z,14Z)/P-18:0);PE(P-18:0/20:3(5Z,8Z,11Z));PE(P-18:0/20:3(8Z,11Z,14Z));PE(P-18:1(11Z)/20:2(11Z,14Z));PE(P-18:1(9Z)/20:2(11Z,14Z));PC(15:0/P-18:0);PE(18:0/P-18:0);PE(20:0/P-16:0);PC(P-18:0/15:0);PE(P-16:0/20:0);PE(P-18:0/18:0)"	274189	297371	278115	289606	383651	294981	799189	822143	864595	818299	880424	760953	563626	302985	824267	0.3676	down	4.83846e-07	1.65497e-05	1.67821
POS	POS_784.575_5.558	784.575	5.558	"PC(16:0/20:3(5Z,8Z,11Z))"	96.09	C44H82NO8P	PC	Phosphatidylcholine	Diacylglycerophosphocholines [GP0101]	Glycerophosphocholines [GP01]	Glycerophospholipids [GP]	PC(14:0/20:0);PC(16:0/18:0);PC(18:0/16:0);PC(20:0/14:0);PE(15:0/22:0);PE(22:0/15:0);PE-NMe(18:0/18:0);PE-NMe(14:0/22:0);PE-NMe(16:0/20:0);PE-NMe(20:0/16:0);PE-NMe(22:0/14:0);PE-NMe2(15:0/20:0);PE-NMe2(20:0/15:0)	607811	9.45837e+06	597192	645489	525763	646283	4.47602e+06	4.35753e+06	4.37391e+06	4.12807e+06	1.29996e+07	3.24864e+06	3.83873e+06	2.08015e+06	5.5973e+06	0.3716	down	0.0138405	0.0439974	1.8424
POS	POS_460.356_3.3778	460.356	3.3778	"2,3-Diacetoxypropyl stearate"	72.3	C25H46O6						Turosteride;(all-E)-6'-Apo-y-caroten-6'-al;N-Palmitoyl Tryptophan;Elocalcitol	4513.01	3823.71	4296.47	4489.43	6068.33	5374.98	17626.5	14609.9	4868.34	4379.65	18624.8	15224.2	8658.27	4760.99	12555.5	0.3792	down	0.0270599	0.0739285	1.27018
NEG	NEG_891.551_5.3199	891.551	5.3199	PI O-40:8	80.8	C49H81O12P	EtherPI	Ether-linked phosphatidylinositol				"PA(24:0/PGE2);PA(PGE2/24:0);PA(24:0/PGD2);PA(PGD2/24:0);PA(24:0/20:4(7E,9E,11Z,13E)-3OH(5S,6R,15S));PA(20:4(7E,9E,11Z,13E)-3OH(5S,6R,15S)/24:0);PA(24:1(15Z)/PGF2alpha);PA(PGF2alpha/24:1(15Z));PA(24:1(15Z)/PGE1);PA(PGE1/24:1(15Z));PA(24:1(15Z)/PGD1);PA(PGD1/24:1(15Z));PA(i-24:0/PGE2);PA(PGE2/i-24:0);PA(i-24:0/PGD2);PA(PGD2/i-24:0);PA(i-24:0/20:4(7E,9E,11Z,13E)-3OH(5S,6R,15S));PA(20:4(7E,9E,11Z,13…	3300.72	2714.54	3260.21	3409.71	2885.8	3972.94	8051.48	9006.72	8686.96	9362.7	8567.87	7829.46	5920.76	3257.32	8584.2	0.3795	down	5.49146e-07	1.81603e-05	1.64798
POS	POS_580.431_4.56	580.431	4.56	LysoPC(22:0/0:0)	86.22	C30H62NO7P	lysoPC		Monoacylglycerophosphocholines [GP0105]	Glycerophosphocholines [GP01]	Glycerophospholipids [GP]	"LysoPC(22:0/0:0);3-Hexaprenyl-4,5-Dihydroxybenzoic acid;Campesteryl caffeate;Cholesteryl ferulate"	17492.3	16313.6	17408.6	19323.2	26164.1	19386.1	57306	46161	49705.9	47831.7	55342.8	47129.4	34963.7	19348	50579.5	0.3825	down	2.31442e-06	5.25446e-05	1.63405
POS	POS_510.355_2.6893	510.355	2.6893	LDGCC 18:4	70.69	C28H47NO7	LDGCC	Lysodiacylglyceryl-3-O-carboxyhydroxymethylcholine				"LysoPE(0:0/20:0);LysoPE(20:0/0:0);LysoPC(17:0/0:0);3-Hydroxyeicosanoylcarnitine;2-Hydroxyicosanoylcarnitine;12-Hydroxyicosanoylcarnitine;15-Hydroxyicosanoylcarnitine;1-(11Z-docosenoyl)-glycero-3-phosphate;LysoPA(22:1(13Z)/0:0);N,N'-Di-1,2,3,4-Tetrahydroacridin-9-Ylheptane-1,7-Diamine"	400160	350817	392264	434770	385599	445680	1.19441e+06	986415	1.08683e+06	1.05908e+06	1.12242e+06	849267	725643	401548	1.04974e+06	0.3825	down	5.65886e-08	3.68473e-06	1.63379
POS	POS_800.612_6.4607	800.612	6.4607	"PC(22:2(13Z,16Z)/15:0)"	73.25	C45H86NO8P	PC	Phosphatidylcholine	Diacylglycerophosphocholines [GP0101]	Glycerophosphocholines [GP01]	Glycerophospholipids [GP]	"PC(15:0/22:2(13Z,16Z));PC(22:2(13Z,16Z)/15:0);PE(16:1(9Z)/24:1(15Z));PE(18:0/22:2(13Z,16Z));PE(18:1(11Z)/22:1(13Z));PE(18:1(9Z)/22:1(13Z));PE(18:2(9Z,12Z)/22:0);PE(20:0/20:2(11Z,14Z));PE(20:1(11Z)/20:1(11Z));PE(20:2(11Z,14Z)/20:0);PE(22:0/18:2(9Z,12Z));PE(22:1(13Z)/18:1(11Z));PE(22:1(13Z)/18:1(9Z));PE(22:2(13Z,16Z)/18:0);PE(24:1(15Z)/16:1(9Z));PE-NMe2(14:1(9Z)/24:1(15Z));PE-NMe2(16:0/22:2(13Z,16…	431296	487948	416150	425345	519773	423144	1.23778e+06	1.11546e+06	1.28565e+06	1.21988e+06	976423	1.22267e+06	813460	450609	1.17631e+06	0.3831	down	1.01793e-08	1.10426e-06	1.63716
POS	POS_744.621_6.841	744.621	6.841	Cer 18:1;O2/30:6	100	C48H83NO3	Cer_NS	Ceramide non-hydroxyfatty acid-sphingosine				"DG(21:0/22:6(5Z,7Z,10Z,13Z,16Z,19Z)-OH(4)/0:0);DG(22:6(5Z,7Z,10Z,13Z,16Z,19Z)-OH(4)/21:0/0:0);DG(21:0/0:0/22:6(5Z,7Z,10Z,13Z,16Z,19Z)-OH(4));DG(22:6(5Z,7Z,10Z,13Z,16Z,19Z)-OH(4)/0:0/21:0);DG(21:0/22:6(4Z,8Z,10Z,13Z,16Z,19Z)-OH(7)/0:0);DG(22:6(4Z,8Z,10Z,13Z,16Z,19Z)-OH(7)/21:0/0:0);DG(21:0/0:0/22:6(4Z,8Z,10Z,13Z,16Z,19Z)-OH(7));DG(22:6(4Z,8Z,10Z,13Z,16Z,19Z)-OH(7)/0:0/21:0);DG(21:0/22:6(4Z,7Z,10Z…	17054.2	21768.9	18237.5	21383.6	20371.4	17623.5	50655.6	38398.7	49961.2	44882.4	44808.7	72300.5	34787.2	19406.5	50167.9	0.3868	down	2.14891e-05	0.000283248	1.58793
POS	POS_895.727_7.7459	895.727	7.7459	SM 31:1;2O(FA 16:2)	75.56	C52H99N2O7P	SM	Sphingomyelin	Ceramide phosphocholines (sphingomyelins) [SP0301]	Phosphosphingolipids [SP03]	Sphingolipids [SP]	"PC(O-22:2(13Z,16Z)/22:3(10Z,13Z,16Z))"	24200.9	30439.5	51852.9	27869.1	63593.9	25885	83333.9	95222.7	103472	93812.1	109802	91952.2	66786.3	37306.9	96265.8	0.3875	down	0.00124723	0.00671352	1.59845
NEG	NEG_730.547_5.2459	730.547	5.2459	CL 18:0_18:0_18:0_18:1	83.8	C81H156O17P2	CL	Cardiolipin				Araliacerebroside;Galactosylceramide (d18:1/14:0)	188.191	180.47	236.781	66.5762	158.034	148.662	444.202	458.735	388.856	440.977	467.505	321.781	291.731	163.119	420.343	0.3881	down	0.00168308	0.00850628	1.56862
POS	POS_804.657_6.8345	804.657	6.8345	PC 9:0_28:0	73.26	C45H90NO8P	PC	Phosphatidylcholine	Diacylglycerophosphocholines [GP0101]	Glycerophosphocholines [GP01]	Glycerophospholipids [GP]		24398	33839.4	25839.7	3993.72	21702.7	25441.6	64987.2	51530.6	74400.5	63152.7	44818.3	49385	40290.8	22535.9	58045.7	0.3882	down	0.0167417	0.0510781	1.50998
POS	POS_758.558_5.4945	758.558	5.4945	PC(20:1(11Z)/14:1(9Z))	88.84	C42H80NO8P	PC	Phosphatidylcholine	Diacylglycerophosphocholines [GP0101]	Glycerophosphocholines [GP01]	Glycerophospholipids [GP]		591964	538907	611930	628348	687529	636204	1.63102e+06	1.45152e+06	1.45495e+06	1.4515e+06	2.12119e+06	1.39937e+06	1.10037e+06	615814	1.58492e+06	0.3885	down	2.09203e-06	4.86021e-05	1.60797
NEG	NEG_502.292_2.2806	502.292	2.2806	LPE 20:3	100	C25H46NO7P	LPE	Lysophosphatidylethanolamine				"LysoPE(0:0/20:3(11Z,14Z,17Z));LysoPE(0:0/20:3(5Z,8Z,11Z));LysoPE(0:0/20:3(8Z,11Z,14Z));LysoPE(20:3(11Z,14Z,17Z)/0:0);LysoPE(20:3(5Z,8Z,11Z)/0:0);LysoPE(20:3(8Z,11Z,14Z)/0:0);CCR4 Antagonist"	1601.89	1295.39	1392.87	1562.68	1407.84	1553.39	3996.41	3986.03	3491.56	4372.34	3619.18	3108.27	2615.65	1469.01	3762.3	0.3905	down	8.97174e-08	4.99164e-06	1.61539
POS	POS_876.557_5.3354	876.557	5.3354	PI 36:4	86.64	C45H79O13P	PI	Sphingolipids	Diacylglycerophosphoinositols [GP0601]	Glycerophosphoinositols [GP06]	Glycerophospholipids [GP]	"PE(22:0/20:4(6E,8Z,11Z,14Z)+=O(5));PE(20:4(6E,8Z,11Z,14Z)+=O(5)/22:0);PE(22:0/20:4(5Z,8Z,11Z,13E)+=O(15));PE(20:4(5Z,8Z,11Z,13E)+=O(15)/22:0);PE(22:0/20:5(5Z,8Z,11Z,14Z,16E)-OH(18R));PE(20:5(5Z,8Z,11Z,14Z,16E)-OH(18R)/22:0);PE(22:0/20:5(5Z,8Z,11Z,14Z,16E)-OH(18));PE(20:5(5Z,8Z,11Z,14Z,16E)-OH(18)/22:0);PE(22:0/20:5(5Z,8Z,10E,14Z,17Z)-OH(12));PE(20:5(5Z,8Z,10E,14Z,17Z)-OH(12)/22:0);PE(22:0/20:5(6…	123641	115349	113642	124380	138486	137974	399437	312721	313537	325780	263413	306433	222899	125579	320220	0.3922	down	3.11655e-07	1.20962e-05	1.60762
POS	POS_634.608_7.1836	634.608	7.1836	Cer 18:2;O2/23:0	100	C41H79NO3	Cer_NS	Ceramide non-hydroxyfatty acid-sphingosine				"N-(Tricosanoyl)-4E,14Z-sphingadienine"	21318.5	40207.4	29622.9	32691.1	49946.2	24038.5	80189.6	72037.1	80392	66910.3	117251	87010.1	58467.9	32970.8	83965.1	0.3927	down	0.000194028	0.00155601	1.56199
NEG	NEG_756.553_6.1042	756.553	6.1042	CL 18:0_18:0_18:0_22:3	91.6	C85H160O17P2	CL	Cardiolipin				"PC(14:0/20:2(11Z,14Z));PC(14:1(9Z)/20:1(11Z));PC(16:0/18:2(9Z,12Z));PC(16:1(9Z)/18:1(11Z));PC(16:1(9Z)/18:1(9Z));PC(18:1(11Z)/16:1(9Z));PC(18:1(9Z)/16:1(9Z));PC(18:2(9Z,12Z)/16:0);PC(20:1(11Z)/14:1(9Z));PC(20:2(11Z,14Z)/14:0);PE(15:0/22:2(13Z,16Z));PE(22:2(13Z,16Z)/15:0);PE-NMe(18:1(9Z)/18:1(9Z));PE-NMe(16:1(9Z)/20:1(11Z));PE-NMe(18:1(9Z)/18:1(11Z));PE-NMe(18:1(11Z)/18:1(9Z));PE-NMe(18:1(11Z)/18…	1070.14	978.17	1198.35	1028.95	849.724	1551.79	2295.14	3038.65	2593.82	3719.88	2780.36	2456.03	1963.42	1112.86	2813.98	0.3955	down	8.23847e-06	0.000136922	1.57632
POS	POS_832.577_7.3571	832.577	7.3571	PC 18:2_22:5	72.27	C48H82NO8P	PC	Phosphatidylcholine	Diacylglycerophosphocholines [GP0101]	Glycerophosphocholines [GP01]	Glycerophospholipids [GP]	"PC(18:1(11Z)/22:6(4Z,7Z,10Z,13Z,16Z,19Z));PC(18:1(9Z)/22:6(4Z,7Z,10Z,13Z,16Z,19Z));PC(18:2(9Z,12Z)/22:5(4Z,7Z,10Z,13Z,16Z));PC(18:2(9Z,12Z)/22:5(7Z,10Z,13Z,16Z,19Z));PC(18:3(6Z,9Z,12Z)/22:4(7Z,10Z,13Z,16Z));PC(18:3(9Z,12Z,15Z)/22:4(7Z,10Z,13Z,16Z));PC(20:2(11Z,14Z)/20:5(5Z,8Z,11Z,14Z,17Z));PC(20:3(5Z,8Z,11Z)/20:4(5Z,8Z,11Z,14Z));PC(20:3(5Z,8Z,11Z)/20:4(8Z,11Z,14Z,17Z));PC(20:3(8Z,11Z,14Z)/20:4(5…	2111.86	606.652	812.056	729.442	4572.23	485.939	4588.78	4012.84	4087.33	4165.35	1525.47	5148.09	2737.17	1553.03	3921.31	0.396	down	0.016889	0.0513886	1.55501
POS	POS_490.289_1.8155	490.289	1.8155	LPC 14:0	100	C22H46NO7P	LPC	Lysophophatidylcholine	Monoacylglycerophosphocholines [GP0105]	Glycerophosphocholines [GP01]	Glycerophospholipids [GP]	"11-(3-Methyl-5-propylfuran-2-yl)undecanoylcarnitine;10-(3,4-Dimethyl-5-propylfuran-2-yl)decanoylcarnitine;11-(5-ethyl-3,4-Dimethylfuran-2-yl)undecanoylcarnitine;7-(5-Hexyl-3,4-dimethylfuran-2-yl)heptanoylcarnitine;8-(3,4-Dimethyl-5-pentylfuran-2-yl)octanoylcarnitine;9-(5-Butyl-3,4-dimethylfuran-2-yl)nonanoylcarnitine;9-(3-Methyl-5-pentylfuran-2-yl)nonanoylcarnitine;LysoPC(14:0/0:0);Buprenorphine…	1474.5	1454.5	1416.88	1549.07	2542.16	1584.25	3796.58	5867.04	3448.01	4811.46	2785.97	4547.33	2939.81	1670.23	4209.4	0.3968	down	7.7007e-05	0.000767613	1.53342
POS	POS_774.587_6.0943	774.587	6.0943	PC 19:0_16:1	85.94	C43H84NO8P	PC	Phosphatidylcholine	Diacylglycerophosphocholines [GP0101]	Glycerophosphocholines [GP01]	Glycerophospholipids [GP]		150642	155913	156099	177729	143284	150431	340352	343688	372648	349576	510277	437333	273998	155683	392312	0.3968	down	5.28624e-06	9.66547e-05	1.58706
POS	POS_959.708_6.9629	959.708	6.9629	SM 10:1;2O/44:12	72.68	C59H95N2O6P	SM	Sphingomyelin	Ceramide phosphocholines (sphingomyelins) [SP0301]	Phosphosphingolipids [SP03]	Sphingolipids [SP]	"TG(15:0/22:6(4Z,7Z,10Z,13Z,16Z,19Z)/22:6(4Z,7Z,10Z,13Z,16Z,19Z));TG(22:6(4Z,7Z,10Z,13Z,16Z,19Z)/15:0/22:6(4Z,7Z,10Z,13Z,16Z,19Z));PC(24:0/PGE2);PC(PGE2/24:0);PC(24:0/PGD2);PC(PGD2/24:0);PC(24:0/20:4(7E,9E,11Z,13E)-3OH(5S,6R,15S));PC(20:4(7E,9E,11Z,13E)-3OH(5S,6R,15S)/24:0);PC(24:1(15Z)/PGF2alpha);PC(PGF2alpha/24:1(15Z));PC(24:1(15Z)/PGE1);PC(PGE1/24:1(15Z));PC(24:1(15Z)/PGD1);PC(PGD1/24:1(15Z))"	371.336	379.224	704.602	364.315	480.097	730.133	980.486	731.02	1032.19	1229.82	1954.63	1704.95	888.567	504.951	1272.18	0.3969	down	0.00105173	0.00586687	1.46062
POS	POS_870.748_8.0732	870.748	8.0732	TG 16:1_18:2_18:2	100	C55H96O6	TG	Triacylglycerol				"TG(16:0/16:1(9Z)/20:4(5Z,8Z,11Z,14Z));TG(16:1(9Z)/18:2(9Z,12Z)/18:2(9Z,12Z));TG(18:1(9Z)/14:0/20:4(5Z,8Z,11Z,14Z));TG(18:2(9Z,12Z)/16:0/18:3(9Z,12Z,15Z));TG(14:0/16:0/22:5(4Z,7Z,10Z,13Z,16Z));TG(14:0/16:0/22:5(7Z,10Z,13Z,16Z,19Z));TG(14:0/18:0/20:5(5Z,8Z,11Z,14Z,17Z));TG(14:0/16:1(9Z)/22:4(7Z,10Z,13Z,16Z));TG(14:0/18:1(11Z)/20:4(5Z,8Z,11Z,14Z));TG(14:0/18:1(11Z)/20:4(8Z,11Z,14Z,17Z));TG(14:0/18:…	4.62163e+06	5.95144e+06	4.73938e+06	4.95678e+06	4.15558e+06	5.22747e+06	1.03177e+07	1.20742e+07	1.33396e+07	1.2456e+07	1.64261e+07	9.96776e+06	8.68613e+06	4.94205e+06	1.24302e+07	0.3976	down	3.77779e-06	7.5693e-05	1.57523
NEG	NEG_780.59_6.7879	780.59	6.7879	PE O-18:0_22:4	100	C45H84NO7P	EtherPE	Ether-linked phosphatidylethanolamine				"PE(22:2(13Z,16Z)/P-18:1(11Z));PE(22:2(13Z,16Z)/P-18:1(9Z));PE(P-18:1(11Z)/22:2(13Z,16Z));PE(P-18:1(9Z)/22:2(13Z,16Z))"	60191	48760.9	57803.2	62620.3	50771.3	67772.6	147537	147007	147879	160210	136953	129383	101407	57986.5	144828	0.4004	down	2.8177e-07	1.11875e-05	1.5999
POS	POS_738.544_5.5798	738.544	5.5798	"PC(P-16:0/18:4(6Z,9Z,12Z,15Z))"	72.84	C42H76NO7P	PC	Phosphatidylcholine	"1Z-alkenyl,2-acylglycerophosphocholines [GP0103]"	Glycerophosphocholines [GP01]	Glycerophospholipids [GP]	"PC(18:4(6Z,9Z,12Z,15Z)/P-16:0);PC(P-16:0/18:4(6Z,9Z,12Z,15Z));PC(14:0/P-18:1(11Z));PC(14:0/P-18:1(9Z));PC(14:1(9Z)/P-18:0);PC(16:1(9Z)/P-16:0);PC(P-16:0/16:1(9Z));PC(P-18:0/14:1(9Z));PC(P-18:1(11Z)/14:0);PC(P-18:1(9Z)/14:0);PC(O-16:1(9Z)/16:1(9Z));AS 1-5;Carotene-zeta;Cer(d18:1/LTE4)"	4777.49	12196.6	2321.76	11537.8	7908.88	7022.37	16065.4	14481.3	13947.4	13303.8	45327.2	11118.1	13334	7627.47	19040.5	0.4006	down	0.0187326	0.0555634	1.33043
POS	POS_1061.89_8.0504	1061.89	8.0504	SM 43:4;O2(FA 16:0)	100	C64H121N2O7P	ASM	Acylsphingomyelin				"TG(18:0/24:0/22:4(7Z,10Z,13Z,16Z));TG(18:0/22:4(7Z,10Z,13Z,16Z)/24:0);TG(20:0/22:0/22:4(7Z,10Z,13Z,16Z));TG(20:0/24:0/20:4(5Z,8Z,11Z,14Z));TG(20:0/24:0/20:4(8Z,11Z,14Z,17Z));TG(20:0/20:3(5Z,8Z,11Z)/24:1(15Z));TG(20:0/24:1(15Z)/20:3(5Z,8Z,11Z));TG(20:0/24:1(15Z)/20:3n6);TG(20:0/20:3n6/24:1(15Z));TG(20:0/20:4(5Z,8Z,11Z,14Z)/24:0);TG(20:0/22:2(13Z,16Z)/22:2(13Z,16Z));TG(20:0/22:4(7Z,10Z,13Z,16Z)/22…	3536.11	3995.57	2344.18	2313.85	3193.51	3305.5	6841.43	8079.43	7218.44	6363.14	6517.33	11581.2	5440.81	3114.79	7766.83	0.401	down	3.43406e-05	0.000404704	1.5371
POS	POS_525.361_2.4657	525.361	2.4657	DG 28:5	100	C31H50O5	DG	Diacylglycerol				Glyceryl 5-hydroxydecanoate	19345.2	19986.3	20138.5	23414.7	25780.1	19057.5	59262.7	54159.4	61810.6	56370.1	41822.9	43475.4	37052	21287	52816.9	0.403	down	1.48313e-06	3.7495e-05	1.57066
POS	POS_568.335_2.2412	568.335	2.2412	LPC 22:6	72.85	C30H50NO7P	LPC	Lysophophatidylcholine	Monoacylglycerophosphocholines [GP0105]	Glycerophosphocholines [GP01]	Glycerophospholipids [GP]	"LysoPC(22:6(4Z,7Z,10Z,13Z,16Z,19Z)/0:0);Cholesterol glutamate;LysoPC(20:3(5Z,8Z,11Z)/0:0);LysoPC(20:3(8Z,11Z,14Z)/0:0);Cholylhistidine"	15711.5	12795	14285.8	17824.4	19356.1	16089.7	38951.9	38673.5	34585.3	36765.5	43617.5	44582.5	27769.9	16010.4	39529.4	0.405	down	7.85331e-07	2.33462e-05	1.58195
POS	POS_738.575_6.0854	738.575	6.0854	HexCer 37:2;O3	74.9	C43H81NO9	HexCer_HS	Hexosylceramide hydroxyfatty acid-sphingosine					18138.1	16639.4	14154	15426.1	38245.8	16109.9	50863.2	55432.9	53230.5	52504.2	26503	54167.7	34284.6	19785.6	48783.6	0.4056	down	0.000667395	0.00410329	1.50152
POS	POS_398.324_1.9378	398.324	1.9378	9-Hexadecenoylcarnitine	70.29	C23H43NO4						"trans-Hexadec-2-enoyl carnitine;O-Palmitoleoylcarnitine;(11Z)-Hexadecenoylcarnitine;(6Z)-Hexadecenoylcarnitine;4-Hexadecenoylcarnitine;7-Hexadecenoylcarnitine;Hexadecenoylcarnitine;MG(0:0/20:3(11Z,14Z,17Z)/0:0);MG(0:0/20:3(5Z,8Z,11Z)/0:0);MG(0:0/20:3(8Z,11Z,14Z)/0:0);MG(20:3(11Z,14Z,17Z)/0:0/0:0);MG(20:3(5Z,8Z,11Z)/0:0/0:0);MG(20:3(8Z,11Z,14Z)/0:0/0:0);Isopersin;2-Hydroxy-4-oxo-5,12-heneicosadie…	9735.78	7284.89	8489.49	11040.4	16231.9	10822.4	31870	23460.8	26710.8	24860.7	26810.8	23098.1	18368	10600.8	26135.2	0.4056	down	0.000142492	0.00122209	1.56109
POS	POS_898.627_5.5188	898.627	5.5188	PC 9:0_36:9	72.89	C53H88NO8P	PC	Phosphatidylcholine	Diacylglycerophosphocholines [GP0101]	Glycerophosphocholines [GP01]	Glycerophospholipids [GP]	"PE(22:5(4Z,7Z,10Z,13Z,16Z)/24:1(15Z));PE(22:5(7Z,10Z,13Z,16Z,19Z)/24:1(15Z));PE(22:6(4Z,7Z,10Z,13Z,16Z,19Z)/24:0);PE(24:0/22:6(4Z,7Z,10Z,13Z,16Z,19Z));PE(24:1(15Z)/22:5(4Z,7Z,10Z,13Z,16Z));PE(24:1(15Z)/22:5(7Z,10Z,13Z,16Z,19Z));PE-NMe2(20:5(5Z,8Z,11Z,14Z,17Z)/24:1(15Z));PE-NMe2(22:1(13Z)/22:5(4Z,7Z,10Z,13Z,16Z));PE-NMe2(22:1(13Z)/22:5(7Z,10Z,13Z,16Z,19Z));PE-NMe2(22:2(13Z,16Z)/22:4(7Z,10Z,13Z,16…	2151.62	1280.21	921.143	1354.48	4183.6	2155.59	5244.62	5997.89	2980.6	5962.11	3967.76	5367.53	3463.93	2007.77	4920.09	0.4081	down	0.00422379	0.017516	1.49
NEG	NEG_1179.74_5.6768	1179.74	5.6768	GM3 14:0;2O/22:1	70.96	C59H108N2O21	GM3	Ganglioside GM3				"Ganglioside GM3 (d18:1/18:0);Ganglioside GM3 (d18:0/18:1(11Z));Ganglioside GM3 (d18:0/18:1(9Z));CL(8:0/8:0/18:0/18:2(9Z,11Z));CL(8:0/8:0/i-18:0/18:2(9Z,11Z));CL(8:0/10:0/16:0/18:2(9Z,11Z));CL(8:0/10:0/i-16:0/18:2(9Z,11Z));CL(8:0/11:0/15:0/18:2(9Z,11Z));CL(8:0/11:0/a-15:0/18:2(9Z,11Z));CL(8:0/11:0/i-15:0/18:2(9Z,11Z));CL(8:0/12:0/14:0/18:2(9Z,11Z));CL(8:0/12:0/i-14:0/18:2(9Z,11Z));CL(8:0/i-12:0/1…	6820.07	5397.29	7399.76	7977.54	4511.11	8176.7	16233.2	17262.3	17016.1	17389.5	15748.7	14556.3	11540.7	6713.75	16367.7	0.4102	down	0.000120919	0.0010766	1.56356
POS	POS_881.729_2.8895	881.729	2.8895	SM 46:3;O2	74.7	C51H97N2O7P	ASM	Acylsphingomyelin				"TG(14:0/20:3(5Z,8Z,11Z)/O-18:0);TG(14:0/20:3n6/O-18:0);TG(14:0/O-18:0/20:3(5Z,8Z,11Z));TG(14:0/O-18:0/20:3n6);TG(16:0/18:3(6Z,9Z,12Z)/O-18:0);TG(16:0/18:3(9Z,12Z,15Z)/O-18:0);TG(16:0/O-18:0/18:3(6Z,9Z,12Z));TG(16:0/O-18:0/18:3(9Z,12Z,15Z));TG(14:1(9Z)/20:2n6/O-18:0);TG(14:1(9Z)/O-18:0/20:2n6);TG(16:1(9Z)/18:2(9Z,12Z)/O-18:0);TG(16:1(9Z)/O-18:0/18:2(9Z,12Z));TG(20:3(5Z,8Z,11Z)/14:0/O-18:0);TG(18:…	1569.77	939.626	1287.57	1595.64	1639.25	1905.46	5056.84	2179	3628.48	4703.06	2399.41	3754.67	2554.9	1489.55	3620.24	0.4115	down	0.00073499	0.00442239	1.44147
POS	POS_727.571_5.498	727.571	5.498	SM 26:3;2O/10:0	72.92	C41H79N2O6P	SM	Sphingomyelin	Ceramide phosphocholines (sphingomyelins) [SP0301]	Phosphosphingolipids [SP03]	Sphingolipids [SP]	"N-Tetradecyl-N,N-dimethyl-3-ammonio-1-propanesulfonate;N-(9Z-Octadecenoyl)-4E,14Z-sphingadienine-1-phosphocholine;ubiquinone-8;DG(22:1n9/0:0/18:2n6);DG(22:1(13Z)/19:2(10Z,13Z)/0:0);SM(d18:0/16:0)"	51952.7	54063.9	51162.6	55519.5	84679.7	60683.9	161787	143524	136713	134507	103259	187654	102125	59677.1	144574	0.4128	down	1.39773e-05	0.000206134	1.52763
POS	POS_756.552_5.4891	756.552	5.4891	"PC(20:2(11Z,14Z)/14:1(9Z))"	94.37	C42H78NO8P	PC	Phosphatidylcholine	Diacylglycerophosphocholines [GP0101]	Glycerophosphocholines [GP01]	Glycerophospholipids [GP]	"PC(14:0/20:3(5Z,8Z,11Z));PC(14:0/20:3(8Z,11Z,14Z));PC(14:1(9Z)/20:2(11Z,14Z));PC(16:0/18:3(6Z,9Z,12Z));PC(16:0/18:3(9Z,12Z,15Z));PC(16:1(9Z)/18:2(9Z,12Z));PC(18:2(9Z,12Z)/16:1(9Z));PC(18:3(6Z,9Z,12Z)/16:0);PC(18:3(9Z,12Z,15Z)/16:0);PC(20:2(11Z,14Z)/14:1(9Z));PC(20:3(5Z,8Z,11Z)/14:0);PC(20:3(8Z,11Z,14Z)/14:0);PE-NMe(14:1(9Z)/22:2(13Z,16Z));PE-NMe(16:0/20:3(5Z,8Z,11Z));PE-NMe(16:0/20:3(8Z,11Z,14Z)…	4.88568e+06	4.27607e+06	4.87769e+06	5.24965e+06	4.33178e+06	5.2233e+06	1.34946e+07	1.27589e+07	1.2198e+07	1.25206e+07	9.47423e+06	9.27692e+06	8.21395e+06	4.80736e+06	1.16205e+07	0.4137	down	3.46747e-06	7.11806e-05	1.54923
NEG	NEG_857.521_5.3296	857.521	5.3296	"PI(18:3(6Z,9Z,12Z)/18:1(9Z))"	92.44	C45H79O13P	PI	Sphingolipids	Diacylglycerophosphoinositols [GP0601]	Glycerophosphoinositols [GP06]	Glycerophospholipids [GP]	"PI(16:0/20:4(8Z,11Z,14Z,17Z));Phosphatidylinositol(36:4);PG(i-19:0/20:5(7Z,9Z,11E,13E,17Z)-3OH(5,6,15));PG(20:5(7Z,9Z,11E,13E,17Z)-3OH(5,6,15)/i-19:0);Mifepristone;(8S,11R,13R,14S,17S)-11-[4-(Dimethylamino)phenyl]-17-hydroxy-13-methyl-17-prop-1-ynyl-1,2,6,7,8,11,12,14,15,16-decahydrocyclopenta[a]phenanthren-3-one;PA(21:0/20:5(7Z,9Z,11E,13E,17Z)-3OH(5,6,15));PA(20:5(7Z,9Z,11E,13E,17Z)-3OH(5,6,15)…	89173.2	75328.6	84068	97282.6	79507.5	105494	220797	226214	206728	224003	209491	183411	150125	88475.6	211774	0.4178	down	3.34939e-07	1.2622e-05	1.55992
POS	POS_770.642_6.8585	770.642	6.8585	Cer 14:2;O2/36:6	100	C50H85NO3	Cer_NS	Ceramide non-hydroxyfatty acid-sphingosine				Tetrac	27818.9	34687.5	31132.3	29905	41431.1	25757.6	83862.1	75116.5	78498.5	75359.2	83296.9	59943.1	53900.7	31788.7	76012.7	0.4182	down	2.53807e-06	5.63217e-05	1.54376
POS	POS_647.508_4.6995	647.508	4.6995	SM 30:1;O2	100	C35H71N2O6P	SM	Sphingomyelin				SM(d18:1/12:0)	4487.92	3693.3	3085.84	3179.61	4280.19	4485.51	8787.41	8089.76	9069.77	8558.6	9528.83	11398.4	6553.76	3868.73	9238.79	0.4187	down	2.85898e-06	6.14899e-05	1.54246
POS	POS_872.61_5.474	872.61	5.474	PC 9:0_34:8	72.84	C51H86NO8P	PC	Phosphatidylcholine	Diacylglycerophosphocholines [GP0101]	Glycerophosphocholines [GP01]	Glycerophospholipids [GP]	"PE-NMe2(22:2(13Z,16Z)/22:6(4Z,7Z,10Z,13Z,16Z,19Z));PE-NMe2(22:4(7Z,10Z,13Z,16Z)/22:4(7Z,10Z,13Z,16Z));PE-NMe2(22:6(4Z,7Z,10Z,13Z,16Z,19Z)/22:2(13Z,16Z));PE(20:4(5Z,8Z,11Z,14Z)/24:1(15Z));PE(20:4(8Z,11Z,14Z,17Z)/24:1(15Z));PE(20:5(5Z,8Z,11Z,14Z,17Z)/24:0);PE(22:0/22:5(4Z,7Z,10Z,13Z,16Z));PE(22:0/22:5(7Z,10Z,13Z,16Z,19Z));PE(22:1(13Z)/22:4(7Z,10Z,13Z,16Z));PE(22:4(7Z,10Z,13Z,16Z)/22:1(13Z));PE(22:…	1609.02	2591.76	1443.96	1185.31	2370.33	1095.71	2967.46	3600.89	5024.14	4676.22	5124.65	3196.57	2907.17	1716.02	4098.32	0.4187	down	0.000652664	0.00402896	1.476
POS	POS_766.537_5.2367	766.537	5.2367	"PC(15:0/20:5(5Z,8Z,11Z,14Z,17Z))"	75.8	C43H76NO8P	PC	Phosphatidylcholine	Diacylglycerophosphocholines [GP0101]	Glycerophosphocholines [GP01]	Glycerophospholipids [GP]	"PC(15:0/20:5(5Z,8Z,11Z,14Z,17Z));PC(20:5(5Z,8Z,11Z,14Z,17Z)/15:0);PE(16:0/22:5(4Z,7Z,10Z,13Z,16Z));PE(16:0/22:5(7Z,10Z,13Z,16Z,19Z));PE(16:1(9Z)/22:4(7Z,10Z,13Z,16Z));PE(18:0/20:5(5Z,8Z,11Z,14Z,17Z));PE(18:1(11Z)/20:4(5Z,8Z,11Z,14Z));PE(18:1(11Z)/20:4(8Z,11Z,14Z,17Z));PE(18:1(9Z)/20:4(5Z,8Z,11Z,14Z));PE(18:1(9Z)/20:4(8Z,11Z,14Z,17Z));PE(18:2(9Z,12Z)/20:3(5Z,8Z,11Z));PE(18:2(9Z,12Z)/20:3(8Z,11Z,1…	5219.17	6942.89	6571.58	6328.61	5775.98	4400.89	9802.77	9436.17	13856	8727.95	28280.2	13690.6	9919.4	5873.19	13965.6	0.4205	down	0.00522941	0.0207408	1.33435
POS	POS_336.288_2.9399	336.288	2.9399	NAE 19:3	100	C21H37NO2	NAE	N-acyl ethanolamines				"2-Propanol, 1-((1-methylethyl)amino)-3-(2,4,6-tripropylphenoxy)-;Alloepipregnanolone;Epimetendiol;3a-Hydroxy-5b-pregnane-20-one;5-(8-Pentadecenyl)-1,3-benzenediol;(2E,5E,12Z,15Z)-1-Hydroxy-2,5,12,15-heneicosatetraen-4-one;5alpha-Pregnan-20alpha-ol-3-one;Methyl Arachidonate;3-Hydroxypregnan-20-one;Pregnenediol;2-[(1r,3s)-3-Hydroxycyclohexyl]-5-(2-methyloctan-2-yl)phenol"	1871.01	17733.4	2263.98	3127.61	5261.88	3082.93	14281.8	12513.9	13837.2	11855.1	14173.6	11982.3	9332.06	5556.81	13107.3	0.4239	down	0.0153911	0.0478585	1.59623
POS	POS_774.561_4.3629	774.561	4.3629	"PC(18:1(12Z)-O(9S,10R)/16:0)"	70.4	C42H80NO9P	PC	Phosphatidylcholine	Diacylglycerophosphocholines [GP0101]	Glycerophosphocholines [GP01]	Glycerophospholipids [GP]	"PC(16:0/18:1(12Z)-O(9S,10R));PC(18:1(12Z)-O(9S,10R)/16:0);PC(16:0/18:1(9Z)-O(12,13));PC(18:1(9Z)-O(12,13)/16:0);PA(19:0/20:3(6,8,11)-OH(5));PA(20:3(6,8,11)-OH(5)/19:0);PA(21:0/18:2(10E,12Z)+=O(9));PA(18:2(10E,12Z)+=O(9)/21:0);PA(21:0/18:2(9Z,11E)+=O(13));PA(18:2(9Z,11E)+=O(13)/21:0);PA(21:0/18:3(10,12,15)-OH(9));PA(18:3(10,12,15)-OH(9)/21:0);PA(21:0/18:3(9,11,15)-OH(13));PA(18:3(9,11,15)-OH(13)/…	10805.9	14670.6	13173.2	11137.8	20229.5	12183.5	37224	29661	33700.7	29789.9	35657.8	27490.6	22977	13700.1	32254	0.4248	down	5.24905e-05	0.000563762	1.52209
POS	POS_831.69_7.1308	831.69	7.1308	TG O-22:4_14:1_14:1	100	C53H92O5	EtherTG	Ether-linked triacylglycerol				Tomatidine;Cholesterol nitrite;PA(20:0/a-25:0);PA(21:0/i-24:0);PA(a-21:0/i-24:0);PA(a-25:0/20:0);PA(a-25:0/i-20:0);PA(i-20:0/a-25:0);PA(i-21:0/i-24:0);PA(i-24:0/21:0);PA(i-24:0/a-21:0);PA(i-24:0/i-21:0);TG(14:0/15:0/18:0);TG(14:0/18:0/15:0);TG(15:0/14:0/18:0);TG(15:0/16:0/16:0);TG(16:0/15:0/16:0);TG(i-20:0/i-14:0/i-13:0);TG(i-20:0/8:0/19:0);TG(i-20:0/13:0/i-14:0);TG(i-20:0/8:0/i-19:0);TG(i-20:0/a…	50628.4	80318.6	62580.7	60764.3	103689	56417.9	145714	139754	137150	129195	232884	186789	115490	69066.5	161914	0.4266	down	0.000135028	0.00117321	1.47084
NEG	NEG_798.529_5.3323	798.529	5.3323	PE 20:4_18:0;O2	100	C43H78NO10P	OxPE	Oxidized phosphatidylethanolamine				"PE(P-18:1(11Z)/PGE1);PE(18:0/20:4(6Z,8E,10E,14Z)-2OH(5S,12R));PE(20:4(6Z,8E,10E,14Z)-2OH(5S,12R)/18:0);PE(18:0/20:4(6E,8Z,11Z,13E)-2OH(5S,15S));PE(20:4(6E,8Z,11Z,13E)-2OH(5S,15S)/18:0);PE(18:0/20:4(8Z,11Z,14Z,17Z)-2OH(5S,6R));PE(20:4(8Z,11Z,14Z,17Z)-2OH(5S,6R)/18:0);PE(18:1(11Z)/20:3(8Z,11Z,14Z)-2OH(5,6));PE(20:3(8Z,11Z,14Z)-2OH(5,6)/18:1(11Z));PE(18:1(9Z)/20:3(8Z,11Z,14Z)-2OH(5,6));PE(20:3(8Z,1…	11081	9536.65	10015.1	11803.3	9940.93	12725.7	19191.5	28874.7	26399.5	28279.7	26708.5	21989.4	18045.5	10850.4	25240.5	0.4299	down	2.5708e-06	5.69199e-05	1.5105
POS	POS_744.551_5.6812	744.551	5.6812	PC 15:0_18:2	100	C41H78NO8P	PC	Phosphatidylcholine				"PC(15:0/18:2(9Z,12Z));PC(18:2(9Z,12Z)/15:0);PE(14:0/22:2(13Z,16Z));PE(14:1(9Z)/22:1(13Z));PE(16:0/20:2(11Z,14Z));PE(16:1(9Z)/20:1(11Z));PE(18:0/18:2(9Z,12Z));PE(18:1(11Z)/18:1(11Z));PE(18:1(11Z)/18:1(9Z));PE(18:1(9Z)/18:1(11Z));PE(18:1(9Z)/18:1(9Z));PE(18:2(9Z,12Z)/18:0);PE(20:1(11Z)/16:1(9Z));PE(20:2(11Z,14Z)/16:0);PE(22:1(13Z)/14:1(9Z));PE(22:2(13Z,16Z)/14:0);PE-NMe(15:0/20:2(11Z,14Z));PE-NMe(…	493380	453664	522489	522590	590873	523700	1.26581e+06	1.10957e+06	1.14837e+06	1.07673e+06	1.60293e+06	1.00967e+06	859980	517782	1.20218e+06	0.4307	down	6.49506e-06	0.000113705	1.50821
POS	POS_962.705_6.8053	962.705	6.8053	HexCer 53:11;O4	71.2	C59H97NO10	HexCer_EOS	Hexosylceramide Esterified omega-hydroxy fatty acid-sphingosine				"PC(22:2(13Z,16Z)/24:1(15Z));PC(24:1(15Z)/22:2(13Z,16Z))"	1596.87	2599.64	1943.9	2149.8	4072.12	1714.16	5052.75	4333.44	4218.06	3282.48	8437.94	7352.99	3896.18	2346.08	5446.28	0.4308	down	0.00198193	0.00968807	1.37915
POS	POS_822.561_4.0788	822.561	4.0788	"PC(20:4(5Z,8Z,11Z,14Z)/18:1(12Z)-O(9S,10R))"	71.42	C46H80NO9P	PC	Phosphatidylcholine	Diacylglycerophosphocholines [GP0101]	Glycerophosphocholines [GP01]	Glycerophospholipids [GP]	"PC(16:0/22:6(5Z,7Z,10Z,13Z,16Z,19Z)-OH(4));PC(22:6(5Z,7Z,10Z,13Z,16Z,19Z)-OH(4)/16:0);PC(16:0/22:6(4Z,8Z,10Z,13Z,16Z,19Z)-OH(7));PC(22:6(4Z,8Z,10Z,13Z,16Z,19Z)-OH(7)/16:0);PC(16:0/22:6(4Z,7Z,10Z,12E,16Z,19Z)-OH(14));PC(22:6(4Z,7Z,10Z,12E,16Z,19Z)-OH(14)/16:0);PC(16:0/22:6(4Z,7Z,10Z,13E,15E,19Z)-OH(17));PC(22:6(4Z,7Z,10Z,13E,15E,19Z)-OH(17)/16:0);PC(16:0/22:5(4Z,7Z,10Z,13Z,19Z)-O(16,17));PC(22:5(…	13524.5	19985.6	13826	15356	14964.7	16279	41508.6	36663.7	40240.1	36820.7	27247.4	34984.8	25950.1	15656	36244.2	0.432	down	1.6502e-06	4.05926e-05	1.50762
POS	POS_687.561_7.9161	687.561	7.9161	"DG(18:1(12Z)-O(9S,10R)/i-20:0/0:0)"	73.92	C41H76O6	DG	Diacylglycerol				"DG(20:0/20:4(6E,8Z,11Z,14Z)+=O(5)/0:0);DG(20:4(6E,8Z,11Z,14Z)+=O(5)/20:0/0:0);DG(20:0/0:0/20:4(6E,8Z,11Z,14Z)+=O(5));DG(20:4(6E,8Z,11Z,14Z)+=O(5)/0:0/20:0);DG(20:0/20:4(5Z,8Z,11Z,13E)+=O(15)/0:0);DG(20:4(5Z,8Z,11Z,13E)+=O(15)/20:0/0:0);DG(20:0/0:0/20:4(5Z,8Z,11Z,13E)+=O(15));DG(20:4(5Z,8Z,11Z,13E)+=O(15)/0:0/20:0);DG(20:0/20:5(5Z,8Z,11Z,14Z,16E)-OH(18R)/0:0);DG(20:5(5Z,8Z,11Z,14Z,16E)-OH(18R)/20…	2821.64	4258.14	3051.73	2799.74	2741.1	3642.12	6272.64	8578.95	7576.47	9705.5	5710.44	6761.4	5326.66	3219.08	7434.23	0.433	down	1.84569e-05	0.000254268	1.48021
POS	POS_828.644_6.7594	828.644	6.7594	PC 17:1_22:1	79.73	C47H90NO8P	PC	Phosphatidylcholine	Diacylglycerophosphocholines [GP0101]	Glycerophosphocholines [GP01]	Glycerophospholipids [GP]	"PE(18:1(11Z)/24:1(15Z));PE(18:1(9Z)/24:1(15Z));PE(18:2(9Z,12Z)/24:0);PE(20:0/22:2(13Z,16Z));PE(20:1(11Z)/22:1(13Z));PE(20:2(11Z,14Z)/22:0);PE(22:0/20:2(11Z,14Z));PE(22:1(13Z)/20:1(11Z));PE(22:2(13Z,16Z)/20:0);PE(24:0/18:2(9Z,12Z));PE(24:1(15Z)/18:1(11Z));PE(24:1(15Z)/18:1(9Z));PE-NMe2(16:1(9Z)/24:1(15Z));PE-NMe2(18:0/22:2(13Z,16Z));PE-NMe2(18:1(11Z)/22:1(13Z));PE-NMe2(18:1(9Z)/22:1(13Z));PE-NMe2…	21475.2	30106.5	23107.2	45937.8	81340.4	25787	81717.4	75368.1	74988	74348.8	84642.2	130217	62419.6	37959	86880.2	0.4369	down	0.00494095	0.0198242	1.44555
POS	POS_691.535_5.148	691.535	5.148	SM 32:1;O2	100	C37H75N2O7P	SM	Sphingomyelin				"Eicosapentaenoyl Ethanolamide;Himbacine;1-Piperidinepropanol, alpha-cyclohexyl-4-(3-hydroxyphenyl)-3,4-dimethyl-;N-(2-Hydroxyethyl)icosa-2,4,6,8,10-pentaenamide;DG(20:3(5Z,8Z,11Z)/22:6(4Z,7Z,10Z,13Z,16Z,19Z)/0:0);DG(20:3(8Z,11Z,14Z)/22:6(4Z,7Z,10Z,13Z,16Z,19Z)/0:0);DG(20:4(5Z,8Z,11Z,14Z)/22:5(4Z,7Z,10Z,13Z,16Z)/0:0);DG(20:4(5Z,8Z,11Z,14Z)/22:5(7Z,10Z,13Z,16Z,19Z)/0:0);DG(20:4(8Z,11Z,14Z,17Z)/22:…	8160.7	6696.43	7854.43	9407.76	12143.7	9256.22	23503.7	21186	21896.3	20553.1	12003.9	23114.5	14648.1	8919.87	20376.3	0.4378	down	0.000123443	0.00109456	1.4431
NEG	NEG_500.277_2.0675	500.277	2.0675	LPE 20:4	100	C25H44NO7P	LPE	Lysophosphatidylethanolamine				"Fexofenadine;LysoPE(0:0/20:4(5Z,8Z,11Z,14Z));LysoPE(0:0/20:4(8Z,11Z,14Z,17Z));LysoPE(20:4(5Z,8Z,11Z,14Z)/0:0);LysoPE(20:4(8Z,11Z,14Z,17Z)/0:0);Glycerophospho-N-Arachidonoyl Ethanolamine;Glycocholic acid;3a,7b,12a-Trihydroxyoxocholanyl-Glycine;Glycohyocholic acid;N-Choloylglycine;Pentanoic acid, 5-(dipentylamino)-5-oxo-4-((3-quinolinylcarbonyl)amino)-, (R)-"	17125.5	13409.3	16102.4	18861.3	15737.3	19779.4	42745.6	43248.1	36148.1	39988.8	37470.5	30849.8	27622.2	16835.9	38408.5	0.4383	down	8.68776e-07	2.51392e-05	1.50062
POS	POS_782.601_6.7796	782.601	6.7796	PC O-28:4_9:0	100	C45H84NO7P	EtherPC	Ether-linked phosphatidylcholine				"PE(22:2(13Z,16Z)/P-18:1(11Z));PE(22:2(13Z,16Z)/P-18:1(9Z));PE(P-18:1(11Z)/22:2(13Z,16Z));PE(P-18:1(9Z)/22:2(13Z,16Z));PE(20:0/P-18:0);PE(22:0/P-16:0);PE(P-16:0/22:0);PE(P-18:0/20:0)"	236731	342288	245987	279623	350144	263370	683040	593773	654114	615582	802447	536188	466941	286357	647524	0.4422	down	3.94018e-06	7.8042e-05	1.48483
POS	POS_162.111_0.8472	162.111	0.8472	Carnitine	73	C7H15NO3	Others					L-Carnitine;beta-Hydroxy-gamma-trimethylaminobutyric acid;N-(2-Hydroxyethyl)valine;4-Hydroxycyclohexylcarboxylic acid;Tetrahydrofurfuryl acetate;Botryodiplodin;Methyl (R)-3-methyl-2-oxopentanoate;Ethyl levulinate;3-Hydroxypropyl methacrylate	4096.21	5500.89	4190.06	4338.7	2883.59	3851.35	9270.28	7967.12	10928	8766.13	13109.3	6109.82	6750.96	4143.47	9358.44	0.4428	down	0.000190772	0.00153894	1.4186
POS	POS_803.654_6.4772	803.654	6.4772	DG 48:6	99	C51H88O5	DG	Diacylglycerol				PA(21:0/22:0);PA(22:0/21:0);PA(19:0/i-24:0);PA(21:0/i-22:0);PA(22:0/a-21:0);PA(22:0/i-21:0);PA(a-21:0/22:0);PA(a-21:0/i-22:0);PA(a-25:0/18:0);PA(a-25:0/i-18:0);PA(i-19:0/i-24:0);PA(i-21:0/22:0);PA(i-21:0/i-22:0);PA(i-22:0/21:0);PA(i-22:0/a-21:0);PA(i-22:0/i-21:0);PA(i-24:0/19:0);PA(i-24:0/i-19:0);TG(14:0/15:0/16:0);TG(14:0/16:0/15:0);TG(15:0/14:0/16:0);TG(15:0/15:0/15:0);TG(i-20:0/13:0/12:0);TG(i…	18819.8	23523.5	20993.5	19868.3	16873.8	21921.4	43369.5	41400.3	42537.9	41158	75303.5	31422.1	33099.3	20333.4	45865.2	0.4433	down	0.000563301	0.00360462	1.40712
POS	POS_798.673_7.1654	798.673	7.1654	HexCer 18:1;O2/23:0	100	C47H91NO8	HexCer_NS	Hexosylceramide non-hydroxyfatty acid-sphingosine					26625.6	36447.7	21355.2	25257.7	46833	24688.6	60432.2	52974.2	55190.2	53952	106194	79763.6	49142.8	30201.3	68084.3	0.4436	down	0.00059305	0.0037585	1.39766
NEG	NEG_730.572_6.9076	730.572	6.9076	PE O-18:0_18:1	100	C41H82NO7P	EtherPE	Ether-linked phosphatidylethanolamine				PC(15:0/P-18:0);PE(18:0/P-18:0);PE(20:0/P-16:0);PC(P-18:0/15:0);PE(P-16:0/20:0);PE(P-18:0/18:0)	13505.2	10211.4	13429	13166.2	11347.4	15678.9	29211	29060.4	30219.5	30686.2	29739.9	25199.2	20954.5	12889.7	29019.3	0.4442	down	5.22434e-06	9.59288e-05	1.49995
NEG	NEG_738.506_5.6779	738.506	5.6779	"PE(16:0/20:4(8Z,11Z,14Z,17Z))"	74.14	C41H74NO8P	PE	Phosphatidylethanolamine	Diacylglycerophosphoethanolamines [GP0201]	Glycerophosphoethanolamines [GP02]	Glycerophospholipids [GP]	"PC(15:0/18:4(6Z,9Z,12Z,15Z));PC(18:4(6Z,9Z,12Z,15Z)/15:0);PE(14:0/22:4(7Z,10Z,13Z,16Z));PE(16:0/20:4(5Z,8Z,11Z,14Z));PE(16:0/20:4(8Z,11Z,14Z,17Z));PE(16:1(9Z)/20:3(5Z,8Z,11Z));PE(18:0/18:4(6Z,9Z,12Z,15Z));PE(18:1(11Z)/18:3(6Z,9Z,12Z));PE(18:1(11Z)/18:3(9Z,12Z,15Z));PE(18:1(9Z)/18:3(6Z,9Z,12Z));PE(18:1(9Z)/18:3(9Z,12Z,15Z));PE(18:2(9Z,12Z)/18:2(9Z,12Z));PE(18:3(6Z,9Z,12Z)/18:1(11Z));PE(18:3(6Z,9Z…	2518.07	2404.37	2729.66	2617.14	2083.18	3207.95	5998.07	6252.55	5702.5	6438.05	5699.43	4893.57	4212.04	2593.4	5830.69	0.4448	down	1.28188e-06	3.36389e-05	1.49411
POS	POS_948.885_9.1622	948.885	9.1622	TG 16:0_23:0_18:1	100	C60H114O6	TG	Triacylglycerol					58152.8	70995.3	68716.3	60614.9	70364.7	63518.3	45348.6	119099	137209	165629	280062	134388	106175	65393.7	146956	0.445	down	0.0370899	0.0947325	1.13226
POS	POS_742.605_6.5701	742.605	6.5701	Cer 12:2;O2/36:6	100	C48H81NO3	Cer_NS	Ceramide non-hydroxyfatty acid-sphingosine					9120.24	16009.4	14203.1	13397.6	40880.5	10112.5	38087.5	43416.7	36881.9	39565.7	35014	39909.4	28049.9	17287.2	38812.5	0.4454	down	0.00709281	0.0262295	1.47213
POS	POS_802.588_4.3092	802.588	4.3092	"PC(18:0/18:1(12Z)-O(9S,10R))"	71.4	C44H84NO9P	PC	Phosphatidylcholine	Diacylglycerophosphocholines [GP0101]	Glycerophosphocholines [GP01]	Glycerophospholipids [GP]	"PC(18:0/18:1(12Z)-O(9S,10R));PC(18:1(12Z)-O(9S,10R)/18:0);PC(18:0/18:1(9Z)-O(12,13));PC(18:1(9Z)-O(12,13)/18:0);PC(P-18:1(11Z)/18:1(12Z)-2OH(9,10));PC(18:1(12Z)-2OH(9,10)/P-18:1(11Z));PC(P-18:1(9Z)/18:1(12Z)-2OH(9,10));PC(18:1(12Z)-2OH(9,10)/P-18:1(9Z));3-methoxy-4-hydroxy-5-all-trans-nonaprenylbenzoate;PA(21:0/20:3(6,8,11)-OH(5));PA(20:3(6,8,11)-OH(5)/21:0);PA(a-21:0/20:3(6,8,11)-OH(5));PA(20:3…	3612.69	9945.57	3335.18	3845.7	3465.08	3786.21	11801.6	9696.24	9041.29	9610.38	12221.1	10165.2	7543.86	4665.07	10422.6	0.4476	down	0.0026793	0.0122775	1.45939
POS	POS_772.582_6.0951	772.582	6.0951	"PC(20:2(11Z,14Z)/15:0)"	76.15	C43H82NO8P	PC	Phosphatidylcholine	Diacylglycerophosphocholines [GP0101]	Glycerophosphocholines [GP01]	Glycerophospholipids [GP]	"PC(15:0/20:2(11Z,14Z));PC(20:2(11Z,14Z)/15:0);PE(14:1(9Z)/24:1(15Z));PE(16:0/22:2(13Z,16Z));PE(16:1(9Z)/22:1(13Z));PE(18:0/20:2(11Z,14Z));PE(18:1(11Z)/20:1(11Z));PE(18:1(9Z)/20:1(11Z));PE(18:2(9Z,12Z)/20:0);PE(20:0/18:2(9Z,12Z));PE(20:1(11Z)/18:1(11Z));PE(20:1(11Z)/18:1(9Z));PE(20:2(11Z,14Z)/18:0);PE(22:1(13Z)/16:1(9Z));PE(22:2(13Z,16Z)/16:0);PE(24:1(15Z)/14:1(9Z));PE-NMe2(18:1(9Z)/18:1(9Z));PE-…	1.29134e+06	1.39557e+06	1.51003e+06	1.56082e+06	1.31023e+06	1.42905e+06	3.55574e+06	3.56313e+06	3.62128e+06	3.50878e+06	1.67779e+06	3.03582e+06	2.2883e+06	1.41617e+06	3.16042e+06	0.4481	down	0.0011305	0.00621775	1.39892
POS	POS_504.341_2.4754	504.341	2.4754	LPC O-18:3	71.62	C26H50NO6P	LPC	Lysophophatidylcholine					17129.8	15453.7	16530.2	17833.8	36632.7	19566.5	43235.3	56389.4	41723.3	42585.7	40914	49624.9	33134.9	20524.4	45745.4	0.4487	down	0.000672053	0.00412508	1.45687
POS	POS_705.558_6.8624	705.558	6.8624	VAE 28:5	90.8	C48H74O2	VAE	Vitamin A fatty acid ester				"DG(20:0/18:1(12Z)-2OH(9,10)/0:0);DG(18:1(12Z)-2OH(9,10)/20:0/0:0);DG(20:0/0:0/18:1(12Z)-2OH(9,10));DG(18:1(12Z)-2OH(9,10)/0:0/20:0);DG(i-20:0/18:1(12Z)-2OH(9,10)/0:0);DG(18:1(12Z)-2OH(9,10)/i-20:0/0:0);DG(i-20:0/0:0/18:1(12Z)-2OH(9,10));DG(18:1(12Z)-2OH(9,10)/0:0/i-20:0);PC(14:1(9Z)/P-16:0);PE(15:0/P-18:1(11Z));PE(15:0/P-18:1(9Z));PC(P-16:0/14:1(9Z));PE(P-18:1(11Z)/15:0);PE(P-18:1(9Z)/15:0);PC(O…	9120.16	10480.7	6625.93	8715.64	9534.45	5133.23	18001.9	21236.5	16080.6	13720.3	20963.8	20518.7	13344.3	8268.34	18420.3	0.4489	down	0.000183335	0.0014908	1.43828
NEG	NEG_836.58_5.7176	836.58	5.7176	SHexCer 38:0;O2	92.2	C44H87NO11S	SHexCer	Sulfatide				"PE(22:0/20:4(6E,8Z,11Z,14Z)+=O(5));PE(20:4(6E,8Z,11Z,14Z)+=O(5)/22:0);PE(22:0/20:4(5Z,8Z,11Z,13E)+=O(15));PE(20:4(5Z,8Z,11Z,13E)+=O(15)/22:0);PE(22:0/20:5(5Z,8Z,11Z,14Z,16E)-OH(18R));PE(20:5(5Z,8Z,11Z,14Z,16E)-OH(18R)/22:0);PE(22:0/20:5(5Z,8Z,11Z,14Z,16E)-OH(18));PE(20:5(5Z,8Z,11Z,14Z,16E)-OH(18)/22:0);PE(22:0/20:5(5Z,8Z,10E,14Z,17Z)-OH(12));PE(20:5(5Z,8Z,10E,14Z,17Z)-OH(12)/22:0);PE(22:0/20:5(6…	16797.3	14277.8	17448.1	18450.3	14804	19685.5	39077.1	40933.5	36101.5	39173.2	38015.1	32564.1	27277.3	16910.5	37644.1	0.4492	down	5.24831e-07	1.7626e-05	1.49032
POS	POS_897.744_7.6598	897.744	7.6598	TG O-19:4_18:2_18:2	100	C58H98O5	EtherTG	Ether-linked triacylglycerol				"PC(O-22:1(13Z)/22:3(10Z,13Z,16Z));PC(O-22:2(13Z,16Z)/22:2(13Z,16Z));PC(O-24:0/20:4(8Z,11Z,14Z,17Z))"	12274.3	24047.8	50381.6	23314.2	79690.9	18548	66192.3	72214.1	81736.5	75802	104799	61796	55899.7	34709.5	77089.9	0.4502	down	0.015393	0.0478587	1.43387
POS	POS_892.784_7.9927	892.784	7.9927	TG O-17:3_18:1_20:4	100	C58H98O5	EtherTG	Ether-linked triacylglycerol					88899.1	154238	342114	98556.1	232533	98683.7	243616	289237	431068	269256	570933	445305	272037	169171	374903	0.4512	down	0.00952693	0.0329252	1.34775
POS	POS_767.609_6.4733	767.609	6.4733	SM 23:1;2O/16:3	95.58	C44H83N2O6P	SM	Sphingomyelin	Ceramide phosphocholines (sphingomyelins) [SP0301]	Phosphosphingolipids [SP03]	Sphingolipids [SP]		81976.6	109211	88876.9	92715	134616	89338.1	216835	238556	216307	228585	169925	247608	159546	99455.6	219636	0.4528	down	1.01478e-05	0.000160919	1.46151
POS	POS_552.401_3.7823	552.401	3.7823	LPC 20:0-SN1	72.95	C28H58NO7P	LPC	Lysophophatidylcholine	Monoacylglycerophosphocholines [GP0105]	Glycerophosphocholines [GP01]	Glycerophospholipids [GP]	LysoPC(20:0/0:0);Aliskiren;(2-Acetyloxy-3-octadecoxypropyl) 2-(trimethylazaniumyl)ethyl phosphate;N-Nervonoyl Tyrosine;Pyrohyperforin	52910.4	43946.9	57177.8	61459.3	58784.6	58876.3	142786	127405	127023	122958	103441	109821	88882.4	55525.9	122239	0.4542	down	4.45518e-07	1.55673e-05	1.47106
POS	POS_774.561_4.8423	774.561	4.8423	"PC(16:0/18:1(9Z)-O(12,13))"	77.43	C42H80NO9P	PC	Phosphatidylcholine	Diacylglycerophosphocholines [GP0101]	Glycerophosphocholines [GP01]	Glycerophospholipids [GP]	"PC(16:0/18:1(12Z)-O(9S,10R));PC(18:1(12Z)-O(9S,10R)/16:0);PC(16:0/18:1(9Z)-O(12,13));PC(18:1(9Z)-O(12,13)/16:0);PA(19:0/20:3(6,8,11)-OH(5));PA(20:3(6,8,11)-OH(5)/19:0);PA(21:0/18:2(10E,12Z)+=O(9));PA(18:2(10E,12Z)+=O(9)/21:0);PA(21:0/18:2(9Z,11E)+=O(13));PA(18:2(9Z,11E)+=O(13)/21:0);PA(21:0/18:3(10,12,15)-OH(9));PA(18:3(10,12,15)-OH(9)/21:0);PA(21:0/18:3(9,11,15)-OH(13));PA(18:3(9,11,15)-OH(13)/…	10009.6	31491.1	11201.6	10185.3	25003.3	12194.3	38609.1	37754.7	40408.8	32565.1	25262.9	45371.8	26671.5	16680.9	36662.1	0.455	down	0.00579169	0.022449	1.4031
POS	POS_757.621_6.694	757.621	6.694	SM(d18:1/20:1(11Z))	77.08	C43H85N2O6P	SM	Sphingomyelin	Ceramide phosphocholines (sphingomyelins) [SP0301]	Phosphosphingolipids [SP03]	Sphingolipids [SP]	"SM(d18:1/20:1(11Z));SM(d18:2(4E,14Z)/20:0)"	23789.8	34159.8	22018.1	24719.3	22162.4	27648.3	54617	48786.1	53081.7	50068.3	52155.6	80713	41160	25749.6	56570.3	0.4552	down	1.81215e-05	0.000250506	1.43423
POS	POS_760.545_5.1346	760.545	5.1346	"PC(18:1(9Z)-O(12,13)/15:0)"	78.6	C41H78NO9P	PC	Phosphatidylcholine	Diacylglycerophosphocholines [GP0101]	Glycerophosphocholines [GP01]	Glycerophospholipids [GP]	"PE(18:0/18:1(12Z)-O(9S,10R));PE(18:1(12Z)-O(9S,10R)/18:0);PE(18:0/18:1(9Z)-O(12,13));PE(18:1(9Z)-O(12,13)/18:0);PE(P-18:1(11Z)/18:1(12Z)-2OH(9,10));PE(18:1(12Z)-2OH(9,10)/P-18:1(11Z));PE(P-18:1(9Z)/18:1(12Z)-2OH(9,10));PE(18:1(12Z)-2OH(9,10)/P-18:1(9Z));PC(15:0/18:1(12Z)-O(9S,10R));PC(18:1(12Z)-O(9S,10R)/15:0);PC(15:0/18:1(9Z)-O(12,13));PC(18:1(9Z)-O(12,13)/15:0);PA(18:0/20:3(6,8,11)-OH(5));PA(2…	3806.14	3423.43	3781.39	3631.34	3811.63	593.686	8121.9	8913.32	6908.14	6882.4	2994.18	7933.2	5066.73	3174.6	6958.86	0.4562	down	0.0349564	0.0904687	1.26357
POS	POS_902.571_5.3668	902.571	5.3668	PI 38:5	74.64	C47H81O13P	PI	Sphingolipids	Diacylglycerophosphoinositols [GP0601]	Glycerophosphoinositols [GP06]	Glycerophospholipids [GP]	"3-O-Sulfogalactosylceramide (d18:1/22:0);PE(22:0/22:6(5Z,7Z,10Z,13Z,16Z,19Z)-OH(4));PE(22:6(5Z,7Z,10Z,13Z,16Z,19Z)-OH(4)/22:0);PE(22:0/22:6(4Z,8Z,10Z,13Z,16Z,19Z)-OH(7));PE(22:6(4Z,8Z,10Z,13Z,16Z,19Z)-OH(7)/22:0);PE(22:0/22:6(4Z,7Z,10Z,12E,16Z,19Z)-OH(14));PE(22:6(4Z,7Z,10Z,12E,16Z,19Z)-OH(14)/22:0);PE(22:0/22:6(4Z,7Z,10Z,13E,15E,19Z)-OH(17));PE(22:6(4Z,7Z,10Z,13E,15E,19Z)-OH(17)/22:0);PE(22:0/2…	48033.3	38343.3	46145.9	37797.9	84024.4	53628.6	123029	109615	108915	108541	83776.7	141192	81920.2	51328.9	112512	0.4562	down	0.000370313	0.00260193	1.4252
POS	POS_792.586_5.72	792.586	5.72	"PC(20:4(5Z,8Z,11Z,14Z)/P-18:1(11Z))"	79.33	C46H82NO7P	PC	Phosphatidylcholine	Diacylglycerophosphocholines [GP0101]	Glycerophosphocholines [GP01]	Glycerophospholipids [GP]	"PC(20:4(5Z,8Z,11Z,14Z)/P-18:1(11Z));PC(20:4(5Z,8Z,11Z,14Z)/P-18:1(9Z));PC(20:4(8Z,11Z,14Z,17Z)/P-18:1(11Z));PC(20:4(8Z,11Z,14Z,17Z)/P-18:1(9Z));PC(20:5(5Z,8Z,11Z,14Z,17Z)/P-18:0);PC(22:5(4Z,7Z,10Z,13Z,16Z)/P-16:0);PC(22:5(7Z,10Z,13Z,16Z,19Z)/P-16:0);PC(P-16:0/22:5(4Z,7Z,10Z,13Z,16Z));PC(P-16:0/22:5(7Z,10Z,13Z,16Z,19Z));PC(P-18:0/20:5(5Z,8Z,11Z,14Z,17Z));PC(P-18:1(11Z)/20:4(5Z,8Z,11Z,14Z));PC(P-1…	428022	514483	433483	405092	523437	444739	1.18858e+06	1.05693e+06	1.14562e+06	1.04506e+06	675659	902288	730283	458210	1.00236e+06	0.4571	down	6.26789e-05	0.00065003	1.42884
NEG	NEG_726.542_6.592	726.542	6.592	PE O-18:1_18:2	100	C41H78NO7P	EtherPE	Ether-linked phosphatidylethanolamine				"PE(18:1(11Z)/P-18:1(11Z));PE(18:1(11Z)/P-18:1(9Z));PE(18:1(9Z)/P-18:1(11Z));PE(18:1(9Z)/P-18:1(9Z));PE(18:2(9Z,12Z)/P-18:0);PE(20:2(11Z,14Z)/P-16:0);PE(P-16:0/20:2(11Z,14Z));PE(P-18:0/18:2(9Z,12Z));PE(P-18:1(11Z)/18:1(11Z));PE(P-18:1(11Z)/18:1(9Z));PE(P-18:1(9Z)/18:1(11Z));PE(P-18:1(9Z)/18:1(9Z));Sodium Zirconium Cyclosilicate"	22549.9	18541.5	23024.3	23714.4	19547.6	27043.8	48609.4	46951.7	50906.5	53248.2	50359.8	43703.4	35683.4	22403.6	48963.2	0.4576	down	2.87415e-06	6.15414e-05	1.47301
POS	POS_1322.26_7.599	1322.26	7.599	SM 77:0;O2	70.9	C82H165N2O7P	ASM	Acylsphingomyelin					3827.17	3863.82	4097.01	4769.35	3495.85	4934.4	8869.57	7073.09	9304.6	9878.41	11502.3	7917.27	6627.74	4164.6	9090.88	0.4581	down	7.4084e-06	0.00012645	1.43999
POS	POS_814.555_3.9209	814.555	3.9209	"PC(16:0/20:4(6E,8Z,11Z,13E)-2OH(5S,15S))"	70.24	C44H80NO10P	PC	Phosphatidylcholine	Diacylglycerophosphocholines [GP0101]	Glycerophosphocholines [GP01]	Glycerophospholipids [GP]	"PS(18:0/20:3(8Z,11Z,14Z));PS(20:3(8Z,11Z,14Z)/18:0);PS(16:1(9Z)/22:2(13Z,16Z));PS(18:0/20:3(5Z,8Z,11Z));PS(18:1(11Z)/20:2(11Z,14Z));PS(18:1(9Z)/20:2(11Z,14Z));PS(18:2(9Z,12Z)/20:1(11Z));PS(18:3(6Z,9Z,12Z)/20:0);PS(18:3(9Z,12Z,15Z)/20:0);PS(20:0/18:3(6Z,9Z,12Z));PS(20:0/18:3(9Z,12Z,15Z));PS(20:1(11Z)/18:2(9Z,12Z));PS(20:2(11Z,14Z)/18:1(11Z));PS(20:2(11Z,14Z)/18:1(9Z));PS(20:3(5Z,8Z,11Z)/18:0);PS(…	4739.96	16192.2	5582.04	4553.12	4584.47	4841.8	15630.7	14511.1	19159.7	13521.5	12595.8	12898.8	10734.3	6748.94	14719.6	0.4585	down	0.00561338	0.0218822	1.42964
POS	POS_594.446_4.9302	594.446	4.9302	LPC 23:0/0:0	100	C31H64NO7P	LPC	Lysophophatidylcholine				"Cer(d16:1/20:4(6E,8Z,11Z,14Z)+=O(5));Cer(d16:1/20:4(5Z,8Z,11Z,13E)+=O(15));Cer(d16:1/20:5(5Z,8Z,11Z,14Z,16E)-OH(18R));Cer(d16:1/20:5(5Z,8Z,11Z,14Z,16E)-OH(18));Cer(d16:1/20:5(5Z,8Z,10E,14Z,17Z)-OH(12));Cer(d16:1/20:5(6E,8Z,11Z,14Z,17Z)-OH(5));3-Hexaprenyl-4-hydroxy-5-methoxybenzoic acid;2-Hexaprenyl-3-methyl-5-hydroxy-6-methoxy-1,4-benzoquinone;Campesteryl ferulate;24-Methylcholesterol ferulate;…	5244.63	3351.12	4467.3	5065.99	10040.8	5134.08	16148.9	11443.1	13235.3	13163.8	3467.42	14283.2	8753.8	5550.66	11956.9	0.4642	down	0.0282735	0.0764705	1.15963
POS	POS_1069.71_3.0389	1069.71	3.0389	DGDG O-21:1_24:6	70.03	C60H102O14	DGDG	Digalactosyldiacylglycerol				DG(8:0/PGJ2/0:0);DG(PGJ2/8:0/0:0);DG(8:0/0:0/PGJ2);DG(PGJ2/0:0/8:0)	21923.5	15517.6	20485.5	23224.1	69549.3	31014	58106.3	66613	55315.7	53850.7	55526.4	101877	47750.3	30285.7	65214.9	0.4644	down	0.00742712	0.0272174	1.37318
POS	POS_764.552_5.6986	764.552	5.6986	"PC(18:1(12Z)-2OH(9,10)/14:0)"	73.54	C40H78NO10P	PC	Phosphatidylcholine	Diacylglycerophosphocholines [GP0101]	Glycerophosphocholines [GP01]	Glycerophospholipids [GP]	"PC(18:4(6Z,9Z,12Z,15Z)/P-18:1(11Z));PC(18:4(6Z,9Z,12Z,15Z)/P-18:1(9Z));PC(20:5(5Z,8Z,11Z,14Z,17Z)/P-16:0);PC(P-16:0/20:5(5Z,8Z,11Z,14Z,17Z));PC(P-18:1(11Z)/18:4(6Z,9Z,12Z,15Z));PC(P-18:1(9Z)/18:4(6Z,9Z,12Z,15Z));PC(16:1(9Z)/P-18:1(11Z));PC(16:1(9Z)/P-18:1(9Z));PC(18:2(9Z,12Z)/P-16:0);PC(P-16:0/18:2(9Z,12Z));PC(P-18:1(11Z)/16:1(9Z));PC(P-18:1(9Z)/16:1(9Z));PC(O-16:1(9Z)/18:2(9Z,12Z));Curcumene-al…	24256.5	37221.3	23283.1	22964	57497.6	21289	58063.1	58393.8	62652.7	53572.7	52366.9	114386	48828.9	31085.2	66572.5	0.4669	down	0.00304001	0.0135148	1.3268
POS	POS_773.646_6.7892	773.646	6.7892	SM 33:1;2O/6:0	98.18	C44H89N2O6P	SM	Sphingomyelin	Ceramide phosphocholines (sphingomyelins) [SP0301]	Phosphosphingolipids [SP03]	Sphingolipids [SP]	"1-Phenyl-1,3-eicosanedione;SM(d18:1/21:0);SM(d16:1/23:0);SM(d17:1/22:0);DG(20:0/24:1(15Z)/0:0);DG(20:1(11Z)/24:0/0:0);DG(22:0/22:1(13Z)/0:0);DG(22:1(13Z)/22:0/0:0);DG(24:0/20:1(11Z)/0:0);DG(24:1(15Z)/20:0/0:0);DG(20:0/0:0/24:1n9);DG(22:0/0:0/22:1n9);DG(24:0/0:0/20:1n9);PC(P-18:0/P-18:1(11Z));PC(P-18:0/P-18:1(9Z));PC(P-18:1(11Z)/P-18:0);PC(P-18:1(9Z)/P-18:0)"	439321	695507	454476	519640	541130	507740	1.28545e+06	1.05109e+06	1.09685e+06	1.15247e+06	1.18124e+06	970895	824650	526302	1.123e+06	0.4687	down	8.17513e-06	0.000136124	1.43884
POS	POS_660.597_7.1525	660.597	7.1525	Cer 20:0;O3/22:3(2OH)	100	C42H79NO5	Cer_AP	Ceramide alpha-hydroxy fatty acid-phytospingosine					5254.41	6709.63	4527.65	5713.83	4933.23	5301.75	10453.3	10180.1	8262.55	8919.1	15724.5	15568.5	8462.38	5406.75	11518	0.4694	down	0.000567894	0.003625	1.35172
POS	POS_918.751_7.8272	918.751	7.8272	"TG(20:4(8Z,11Z,14Z,17Z)/14:0/22:5(7Z,10Z,13Z,16Z,19Z))"	70.78	C59H96O6	TG	Triacylglycerol	Triacylglycerols [GL0301]	Triradylglycerols [GL03]	Glycerolipids [GL]	"TG(16:1(9Z)/20:4(5Z,8Z,11Z,14Z)/20:4(5Z,8Z,11Z,14Z));TG(18:2(9Z,12Z)/18:2(9Z,12Z)/20:5(5Z,8Z,11Z,14Z,17Z));TG(18:3(9Z,12Z,15Z)/16:0/22:6(4Z,7Z,10Z,13Z,16Z,19Z));TG(18:3(9Z,12Z,15Z)/18:1(9Z)/20:5(5Z,8Z,11Z,14Z,17Z));TG(20:4(5Z,8Z,11Z,14Z)/18:2(9Z,12Z)/18:3(9Z,12Z,15Z));TG(14:0/20:3(5Z,8Z,11Z)/22:6(4Z,7Z,10Z,13Z,16Z,19Z));TG(14:0/20:3n6/22:6(4Z,7Z,10Z,13Z,16Z,19Z));TG(14:0/20:4(5Z,8Z,11Z,14Z)/22:5…	793971	1.1219e+06	690557	847262	838418	886085	1.48e+06	1.6898e+06	1.79458e+06	1.70468e+06	2.60192e+06	1.7572e+06	1.35053e+06	863032	1.83803e+06	0.4695	down	2.72792e-05	0.00033987	1.40086
POS	POS_897.677_7.7951	897.677	7.7951	TG 16:1_16:1_22:6	100	C57H94O6	TG	Triacylglycerol				"PA(22:0/a-25:0);PA(a-25:0/22:0);PA(a-25:0/i-22:0);PA(i-22:0/a-25:0);PC(22:0/20:4(6E,8Z,11Z,14Z)+=O(5));PC(20:4(6E,8Z,11Z,14Z)+=O(5)/22:0);PC(22:0/20:4(5Z,8Z,11Z,13E)+=O(15));PC(20:4(5Z,8Z,11Z,13E)+=O(15)/22:0);PC(22:0/20:5(5Z,8Z,11Z,14Z,16E)-OH(18R));PC(20:5(5Z,8Z,11Z,14Z,16E)-OH(18R)/22:0);PC(22:0/20:5(5Z,8Z,11Z,14Z,16E)-OH(18));PC(20:5(5Z,8Z,11Z,14Z,16E)-OH(18)/22:0);PC(22:0/20:5(5Z,8Z,10E,14Z…	15469.7	30554.1	44865.4	16060.6	24918.7	19609.7	29064.5	24650.9	92541.7	72096.3	50045.8	53754	39469.3	25246.4	53692.2	0.4702	down	0.0229065	0.0649776	1.15889
POS	POS_791.558_6.467	791.558	6.467	DG 48:12	96.7	C51H76O5	DG	Diacylglycerol				"PA(22:1(13Z)/19:2(10Z,13Z));PS(15:0/20:2(11Z,14Z));PS(20:2(11Z,14Z)/15:0);PE(16:0/20:3(8Z,11Z,14Z)-2OH(5,6));PE(20:3(8Z,11Z,14Z)-2OH(5,6)/16:0);PE(18:2(9Z,12Z)/18:1(12Z)-2OH(9,10));PE(18:1(12Z)-2OH(9,10)/18:2(9Z,12Z));PE(P-16:0/PGF2alpha);PE(PGF2alpha/P-16:0);PE(P-16:0/PGE1);PE(PGE1/P-16:0);PE(P-16:0/PGD1);PE(PGD1/P-16:0);PE(P-18:0/5-iso PGF2VI);PE(5-iso PGF2VI/P-18:0)"	20746	32145.9	25781.2	24751.6	18308.8	28055.2	30632.4	31045.9	47974.5	33894.2	134576	37379.7	38774.2	24964.8	52583.7	0.4748	down	0.049902	0.119907	1.02147
POS	POS_728.541_5.1985	728.541	5.1985	PC O-14:0_19:3	92.9	C41H78NO7P	EtherPC	Ether-linked phosphatidylcholine				"SM(d16:2(4E,8Z)/18:2(10E,12Z)+=O(9));SM(d16:2(4E,8Z)/18:2(9Z,11E)+=O(13));SM(d16:2(4E,8Z)/18:3(10,12,15)-OH(9));SM(d16:2(4E,8Z)/18:3(9,11,15)-OH(13))"	4307.83	4642.72	4099.17	4568.42	3821.44	4293.19	11836.6	9647.24	10734.4	10374.6	4220.38	7388.09	6661.17	4288.8	9033.55	0.4748	down	0.00612149	0.0234642	1.26783
NEG	NEG_883.535_5.3561	883.535	5.3561	"PI(20:3(8Z,11Z,14Z)/18:2(9Z,12Z))"	81.75	C47H81O13P	PI	Sphingolipids	Diacylglycerophosphoinositols [GP0601]	Glycerophosphoinositols [GP06]	Glycerophospholipids [GP]	"PI(16:0/22:5(4Z,7Z,10Z,13Z,16Z));PI(16:0/22:5(7Z,10Z,13Z,16Z,19Z));PI(16:2(9Z,12Z)/22:3(10Z,13Z,16Z));PE(P-18:1(11Z)/LTE4);PE(LTE4/P-18:1(11Z));PE(P-18:1(9Z)/LTE4);PE(LTE4/P-18:1(9Z));Muzanzagenin;2,9-Bis(3-methyl-2E-pentenoyl)-2b,9a-dihydroxy-4Z,10(14)-oplopadien-3-one;Cystone A;PG(18:0/22:6(5Z,7Z,10Z,13Z,16Z,19Z)-OH(4));PG(22:6(5Z,7Z,10Z,13Z,16Z,19Z)-OH(4)/18:0);PG(18:0/22:6(4Z,8Z,10Z,13Z,16Z,…	33992.6	28865.1	34430.1	37591.4	30837	40253.1	73409.5	76964.7	71462.8	76160.7	71148.6	63808.9	53243.7	34328.2	72159.2	0.4757	down	1.41965e-06	3.6335e-05	1.43642
POS	POS_664.655_7.6962	664.655	7.6962	Cer-NS d43:1	73.75	C43H85NO3	Cer-NS					Cer(d18:1/25:0)	58338.5	70085.5	61875.1	69891.8	78301.2	70440.7	145833	119027	144980	132169	211152	106460	105713	68155.4	143270	0.4757	down	0.000248283	0.0018872	1.36705
POS	POS_762.501_5.3769	762.501	5.3769	PC 9:0_26:7	70.89	C43H72NO8P	PC	Phosphatidylcholine	Diacylglycerophosphocholines [GP0101]	Glycerophosphocholines [GP01]	Glycerophospholipids [GP]	"PE(16:1(9Z)/22:6(4Z,7Z,10Z,13Z,16Z,19Z));PE(18:2(9Z,12Z)/20:5(5Z,8Z,11Z,14Z,17Z));PE(18:3(6Z,9Z,12Z)/20:4(5Z,8Z,11Z,14Z));PE(18:3(6Z,9Z,12Z)/20:4(8Z,11Z,14Z,17Z));PE(18:3(9Z,12Z,15Z)/20:4(5Z,8Z,11Z,14Z));PE(18:3(9Z,12Z,15Z)/20:4(8Z,11Z,14Z,17Z));PE(18:4(6Z,9Z,12Z,15Z)/20:3(5Z,8Z,11Z));PE(18:4(6Z,9Z,12Z,15Z)/20:3(8Z,11Z,14Z));PE(20:3(5Z,8Z,11Z)/18:4(6Z,9Z,12Z,15Z));PE(20:3(8Z,11Z,14Z)/18:4(6Z,9Z,…	2792.37	789.02	2919.29	3172.94	7733.52	3369.25	6702.94	6623.25	8773.6	8728.95	5562.85	7267.71	5369.64	3462.73	7276.55	0.4759	down	0.0260121	0.0716778	1.35011
POS	POS_860.602_5.6906	860.602	5.6906	PC 20:3_22:4	72.72	C50H86NO8P	PC	Phosphatidylcholine	Diacylglycerophosphocholines [GP0101]	Glycerophosphocholines [GP01]	Glycerophospholipids [GP]	"PS(22:0/18:1(12Z)-O(9S,10R));PS(18:1(12Z)-O(9S,10R)/22:0);PS(22:0/18:1(9Z)-O(12,13));PS(18:1(9Z)-O(12,13)/22:0);PC(18:0/PGF2alpha);PC(PGF2alpha/18:0);PC(18:0/PGE1);PC(PGE1/18:0);PC(18:0/PGD1);PC(PGD1/18:0);PC(18:1(11Z)/PGF1alpha);PC(PGF1alpha/18:1(11Z));PC(18:1(9Z)/PGF1alpha);PC(PGF1alpha/18:1(9Z));PC(20:0/5-iso PGF2VI);PC(5-iso PGF2VI/20:0);PC(P-18:0/6 keto-PGF1alpha);PC(6 keto-PGF1alpha/P-18:0…	30750.7	34052.9	32218	24140.7	70037.4	31781.9	73916.5	82906.4	75844	76132	64161	95515	57621.4	37163.6	78079.2	0.476	down	0.00195778	0.00958809	1.38723
POS	POS_732.584_6.9009	732.584	6.9009	PE O-36:1	93.6	C41H82NO7P	EtherPE	Ether-linked phosphatidylethanolamine				"PC(15:0/P-18:0);PE(18:0/P-18:0);PE(20:0/P-16:0);PC(P-18:0/15:0);PE(P-16:0/20:0);PE(P-18:0/18:0);DG(11D3/11M5/0:0);DG(11D5/11M3/0:0);DG(11D5/9M5/0:0);DG(11M3/11D5/0:0);DG(11M5/11D3/0:0);DG(11M5/9D5/0:0);DG(13M5/9D3/0:0);DG(9D3/13M5/0:0);DG(9D5/11M5/0:0);DG(9M5/11D5/0:0);DG(19:0/22:6(5Z,8E,10Z,13Z,15E,19Z)-2OH(7S, 17S)/0:0);DG(22:6(5Z,8E,10Z,13Z,15E,19Z)-2OH(7S, 17S)/19:0/0:0);DG(19:0/0:0/22:6(5Z,…	51190.6	73723.9	49394	56286.8	84949.4	55314.7	125714	121030	114270	103872	190500	121001	95604	61809.9	129398	0.4777	down	0.000134848	0.00117216	1.36381
NEG	NEG_859.532_5.4335	859.532	5.4335	"PI(18:0/18:3(9Z,12Z,15Z))"	83.03	C45H81O13P	PI	Sphingolipids	Diacylglycerophosphoinositols [GP0601]	Glycerophosphoinositols [GP06]	Glycerophospholipids [GP]	"PI(16:0/20:3(5Z,8Z,11Z));PI(16:0/20:3(8Z,11Z,14Z));PI(18:0/18:3(6Z,9Z,12Z));PI(18:0/18:3(9Z,12Z,15Z));PG(i-19:0/PGE2);PG(PGE2/i-19:0);PG(i-19:0/PGD2);PG(PGD2/i-19:0);PG(i-19:0/20:4(7E,9E,11Z,13E)-3OH(5S,6R,15S));PG(20:4(7E,9E,11Z,13E)-3OH(5S,6R,15S)/i-19:0);PG(18:0/22:5(4Z,7Z,10Z,13Z,16Z));PG(18:0/22:5(7Z,10Z,13Z,16Z,19Z));PG(18:1(11Z)/22:4(7Z,10Z,13Z,16Z));PG(18:1(9Z)/22:4(7Z,10Z,13Z,16Z));PG(2…	36098.6	31615.6	35736.6	39740.6	32205.1	44218.9	72743.8	85118.4	74668.4	76819.5	77871.2	71184.6	56501.8	36602.6	76401	0.4791	down	2.8249e-06	6.09327e-05	1.42935
POS	POS_482.311_2.5356	482.311	2.5356	LysoPC(15:0/0:0)	88.99	C23H48NO7P	lysoPC		Monoacylglycerophosphocholines [GP0105]	Glycerophosphocholines [GP01]	Glycerophospholipids [GP]		1432.5	1156.4	980.556	1386.49	1626.75	541.076	2299.99	1818.63	2407.55	2581.84	1171.25	4536.91	1828.33	1187.3	2469.36	0.4808	down	0.0159124	0.0490965	1.17205
NEG	NEG_1149.69_4.7069	1149.69	4.7069	GM3 34:2;O2	98	C57H102N2O21	GM3	Ganglioside GM3					2417.39	1781	2295.83	2902.6	1642.63	2999.51	5032.94	5011.26	4983.38	5241.54	4819.41	3986.32	3592.82	2339.83	4845.81	0.4829	down	0.000316769	0.0022858	1.39088
POS	POS_600.6_7.4712	600.6	7.4712	DG O-18:0_16:0	90.1	C37H74O4	EtherDG	Ether-linked diacylglycerol					1787.25	3266.6	2316.67	2840.9	3243.45	2601.19	4995.03	5147.61	5521.86	5159.96	6301.57	6016.5	4099.88	2676.01	5523.75	0.4845	down	0.000203017	0.00161263	1.39089
POS	POS_808.609_6.8111	808.609	6.8111	PC 39:5e	95.74	C47H86NO7P	PC	Phosphatidylcholine	Diacylglycerophosphocholines [GP0101]	Glycerophosphocholines [GP01]	Glycerophospholipids [GP]	"2,4-Dibromo-1-(4-bromophenoxy)benzene;PA(22:0/18:1(12Z)-2OH(9,10));PA(18:1(12Z)-2OH(9,10)/22:0);PA(i-22:0/18:1(12Z)-2OH(9,10));PA(18:1(12Z)-2OH(9,10)/i-22:0)"	11437.3	10694.7	7320.85	12506.3	14568.4	15195	13963.5	18789.2	33980.2	31269.7	19128.9	30718.2	18297.7	11953.8	24641.6	0.4851	down	0.00394486	0.016609	1.23757
POS	POS_880.821_8.955	880.821	8.955	TG(16:0/18:0/18:0)	92.11	C55H106O6	TG	Triacylglycerol	Triacylglycerols [GL0301]	Triradylglycerols [GL03]	Glycerolipids [GL]		975134	747528	736206	730578	1.82115e+06	892931	1.22385e+06	1.72824e+06	2.07656e+06	2.11103e+06	3.02586e+06	2.00136e+06	1.50587e+06	983921	2.02782e+06	0.4852	down	0.00272618	0.0124483	1.28861
NEG	NEG_253.217_3.2146	253.217	3.2146	FA 16:1	100	C16H30O2	FA	Fatty acyls	Unsaturated fatty acids [FA0103]	Fatty Acids and Conjugates [FA01]	Fatty Acyls [FA]	"Hypogeic acid;Trans-Hexa-dec-2-enoic acid;Palmitelaidic acid;(E)-6-Hexadecenoic acid;5-Dodecyldihydro-2(3H)-furanone;15-Hexadecanolide;(Z)-5-Hexadecenoic acid;(E)-3-Hexadecenoic acid;(Z)-13-Hexadecenoic acid;(E)-11-Hexadecenoic acid;Citronellyl hexanoate;(Z)-14-Methyl-6-pentadecenoic acid;15-Hexadecenoic acid;9-Hexadecenoic acid, (9Z)-;Dodecyl methacrylate;Sapienic acid;Cadinene;Guaiane"	42997.5	36885.8	52455.8	52954.4	45617.5	37706.6	100271	97389.8	96230.6	96784.8	84556	76819.6	68389.1	44769.6	92008.6	0.4866	down	6.91209e-06	0.000119873	1.39914
POS	POS_981.825_7.7972	981.825	7.7972	SM 53:3;O2	87.4	C58H113N2O7P	SM	Sphingomyelin				"TG(18:0/20:1(11Z)/20:1(11Z));TG(18:1(9Z)/20:0/20:1(11Z));TG(18:2(9Z,12Z)/20:0/20:0);TG(14:0/22:0/22:2(13Z,16Z));TG(14:0/24:0/20:2n6);TG(14:0/20:1(11Z)/24:1(15Z));TG(14:0/22:1(13Z)/22:1(13Z));TG(14:0/24:1(15Z)/20:1(11Z));TG(14:0/20:2n6/24:0);TG(14:0/22:2(13Z,16Z)/22:0);TG(16:0/20:0/22:2(13Z,16Z));TG(16:0/22:0/20:2n6);TG(16:0/24:0/18:2(9Z,12Z));TG(16:0/18:1(11Z)/24:1(15Z));TG(16:0/18:1(9Z)/24:1(15…	4423.19	5865.67	4782.94	4675.6	4067.78	5245.16	8792.29	7430.4	7198.94	6891.5	14557.6	14632.3	7380.28	4843.39	9917.18	0.4884	down	0.00404673	0.0169581	1.24376
NEG	NEG_478.293_2.5503	478.293	2.5503	LPE 18:1	100	C23H46NO7P	LPE	Lysophosphatidylethanolamine				LysoPE(0:0/18:1(11Z));LysoPE(0:0/18:1(9Z));LysoPE(18:1(11Z)/0:0);LysoPE(18:1(9Z)/0:0);Mofarotene	23845.1	20529.2	22630.6	26458.7	22658.8	28667.3	53045.8	52902.7	48397.5	52018.4	48053.2	41185.1	36699.4	24131.6	49267.1	0.4898	down	7.2329e-07	2.2088e-05	1.3998
NEG	NEG_832.599_6.2832	832.599	6.2832	PC 18:0_18:1	81.1	C44H86NO8P	PC	Phosphatidylcholine	Diacylglycerophosphocholines [GP0101]	Glycerophosphocholines [GP01]	Glycerophospholipids [GP]	"PS(15:0/24:0);PS(24:0/15:0);PE(22:0/18:1(12Z)-2OH(9,10));PE(18:1(12Z)-2OH(9,10)/22:0);PC(20:1(11Z)/P-18:1(11Z));PC(20:1(11Z)/P-18:1(9Z));PC(20:2(11Z,14Z)/P-18:0);PC(22:2(13Z,16Z)/P-16:0);PC(P-16:0/22:2(13Z,16Z));PC(P-18:0/20:2(11Z,14Z));PC(P-18:1(11Z)/20:1(11Z));PC(P-18:1(9Z)/20:1(11Z));PC(O-20:0/18:3(6Z,9Z,12Z));PC(O-20:0/18:3(9Z,12Z,15Z));PC(14:0/22:1(13Z));PC(14:1(9Z)/22:0);PC(16:0/20:1(11Z))…	444647	383695	475321	443548	392497	507295	810065	935446	910544	946776	936402	848170	669534	441167	897901	0.4913	down	5.90912e-07	1.89611e-05	1.40629
POS	POS_793.591_5.7197	793.591	5.7197	"SM(d18:0/22:6(4Z,7Z,10Z,13E,15E,19Z)-OH(17))"	81.81	C45H81N2O7P	SM	Sphingomyelin	Ceramide phosphocholines (sphingomyelins) [SP0301]	Phosphosphingolipids [SP03]	Sphingolipids [SP]	"PG(a-13:0/i-24:0);PG(i-12:0/a-25:0);PG(i-13:0/i-24:0);SM(d18:0/22:6(5Z,7Z,10Z,13Z,16Z,19Z)-OH(4));SM(d18:0/22:6(4Z,8Z,10Z,13Z,16Z,19Z)-OH(7));SM(d18:0/22:6(4Z,7Z,10Z,12E,16Z,19Z)-OH(14));SM(d18:0/22:6(4Z,7Z,10Z,13E,15E,19Z)-OH(17));SM(d18:0/22:5(4Z,7Z,10Z,13Z,19Z)-O(16,17));SM(d20:1/20:4(6E,8Z,11Z,14Z)+=O(5));SM(d20:1/20:4(5Z,8Z,11Z,13E)+=O(15));SM(d20:1/20:5(5Z,8Z,11Z,14Z,16E)-OH(18R));SM(d20:1…	216478	228957	238859	217787	298381	249365	579093	510174	526731	506055	331891	495194	366580	241638	491523	0.4916	down	5.25628e-05	0.000564305	1.3578
POS	POS_790.57_5.6913	790.57	5.6913	"PC(20:5(5Z,8Z,11Z,14Z,17Z)/P-18:1(11Z))"	79.36	C46H80NO7P	PC	Phosphatidylcholine	Diacylglycerophosphocholines [GP0101]	Glycerophosphocholines [GP01]	Glycerophospholipids [GP]	"PC(20:5(5Z,8Z,11Z,14Z,17Z)/P-18:1(11Z));PC(20:5(5Z,8Z,11Z,14Z,17Z)/P-18:1(9Z));PC(22:6(4Z,7Z,10Z,13Z,16Z,19Z)/P-16:0);PC(P-16:0/22:6(4Z,7Z,10Z,13Z,16Z,19Z));PC(P-18:1(11Z)/20:5(5Z,8Z,11Z,14Z,17Z));PC(P-18:1(9Z)/20:5(5Z,8Z,11Z,14Z,17Z));PC(16:0p/22:6);PC(18:2(9Z,12Z)/P-18:1(11Z));PC(18:2(9Z,12Z)/P-18:1(9Z));PC(18:3(6Z,9Z,12Z)/P-18:0);PC(18:3(9Z,12Z,15Z)/P-18:0);PC(20:3(5Z,8Z,11Z)/P-16:0);PC(20:3(…	36780.8	62788.1	42454.1	42370.8	40796.2	42059	92146.2	112031	85747.5	111871	56001	80498.2	67128.6	44541.5	89715.8	0.4965	down	0.000457511	0.00307144	1.29926
NEG	NEG_843.568_6.3128	843.568	6.3128	DGGA 20:3_20:3	100	C49H80O11	DGGA	Diacylglyceryl glucuronide				"PA(a-25:0/5-iso PGF2VI);PA(5-iso PGF2VI/a-25:0);PG(i-20:0/20:3(6,8,11)-OH(5));PG(20:3(6,8,11)-OH(5)/i-20:0);PG(i-22:0/18:2(10E,12Z)+=O(9));PG(18:2(10E,12Z)+=O(9)/i-22:0);PG(i-22:0/18:2(9Z,11E)+=O(13));PG(18:2(9Z,11E)+=O(13)/i-22:0);PG(i-22:0/18:3(10,12,15)-OH(9));PG(18:3(10,12,15)-OH(9)/i-22:0);PG(i-22:0/18:3(9,11,15)-OH(13));PG(18:3(9,11,15)-OH(13)/i-22:0);PA(20:3(5Z,8Z,11Z)/24:1(15Z));PA(20:4(…	9577.38	10011.9	9838.7	9374.11	8631.62	9782.83	19204	20616.9	18855.2	19938.6	18814.5	17142.2	14315.7	9536.09	19095.2	0.4994	down	2.33458e-09	3.98214e-07	1.39568
POS	POS_939.775_7.4567	939.775	7.4567	SM 50:3;O2	88.1	C55H107N2O7P	SM	Sphingomyelin				"TG(20:5(5Z,8Z,11Z,14Z,17Z)/22:6(4Z,7Z,10Z,13Z,16Z,19Z)/O-18:0);TG(20:5(5Z,8Z,11Z,14Z,17Z)/O-18:0/22:6(4Z,7Z,10Z,13Z,16Z,19Z));TG(22:6(4Z,7Z,10Z,13Z,16Z,19Z)/20:5(5Z,8Z,11Z,14Z,17Z)/O-18:0);TG(15:0/18:0/22:2(13Z,16Z));TG(15:0/20:0/20:2n6);TG(15:0/22:0/18:2(9Z,12Z));TG(15:0/16:1(9Z)/24:1(15Z));TG(15:0/18:1(11Z)/22:1(13Z));TG(15:0/18:1(9Z)/22:1(13Z));TG(15:0/20:1(11Z)/20:1(11Z));TG(15:0/22:1(13Z)/1…	29523.2	46685.2	30095.1	33366.8	27697.3	30954.7	55535.6	71182.2	52766.1	50010.5	63213.5	104186	49601.4	33053.7	66149	0.4997	down	0.000735904	0.00442584	1.27533
POS	POS_566.319_1.9951	566.319	1.9951	LPC 20:4	80.16	C28H50NO7P	LPC	Lysophophatidylcholine	Monoacylglycerophosphocholines [GP0105]	Glycerophosphocholines [GP01]	Glycerophospholipids [GP]	"Daphniphylline;LysoPC(20:4(5Z,8Z,11Z,14Z)/0:0);LysoPC(20:4(8Z,11Z,14Z,17Z)/0:0);LysoPC(0:0/20:4(5Z,8Z,11Z,14Z))"	57893.7	51555.7	49923.7	61173.3	58291.6	64559.7	114219	115136	107525	111106	119175	118492	85754.3	57232.9	114276	0.5008	down	1.76593e-06	4.27499e-05	1.39137
NEG	NEG_832.597_6.2834	832.597	6.2834	PC 36:1	77.23	C44H86NO8P	PC	Phosphatidylcholine	Diacylglycerophosphocholines [GP0101]	Glycerophosphocholines [GP01]	Glycerophospholipids [GP]	"PC(20:1(11Z)/P-18:1(11Z));PC(20:1(11Z)/P-18:1(9Z));PC(20:2(11Z,14Z)/P-18:0);PC(22:2(13Z,16Z)/P-16:0);PC(P-16:0/22:2(13Z,16Z));PC(P-18:0/20:2(11Z,14Z));PC(P-18:1(11Z)/20:1(11Z));PC(P-18:1(9Z)/20:1(11Z));PC(O-20:0/18:3(6Z,9Z,12Z));PC(O-20:0/18:3(9Z,12Z,15Z))"	440144	379616	471233	436966	394255	514408	777603	918480	883701	954248	903877	827265	658483	439437	877529	0.5008	down	6.64095e-07	2.07696e-05	1.3835
POS	POS_852.637_6.6377	852.637	6.6377	PC 13:1_28:3	75.04	C49H90NO8P	PC	Phosphatidylcholine	Diacylglycerophosphocholines [GP0101]	Glycerophosphocholines [GP01]	Glycerophospholipids [GP]	PC(15:0/24:1(15Z));PC(24:1(15Z)/15:0);PE(18:0/24:1(15Z));PE(18:1(11Z)/24:0);PE(18:1(9Z)/24:0);PE(20:0/22:1(13Z));PE(20:1(11Z)/22:0);PE(22:0/20:1(11Z));PE(22:1(13Z)/20:0);PE(24:0/18:1(11Z));PE(24:0/18:1(9Z));PE(24:1(15Z)/18:0);PE-NMe2(16:0/24:1(15Z));PE-NMe2(16:1(9Z)/24:0);PE-NMe2(18:0/22:1(13Z));PE-NMe2(18:1(11Z)/22:0);PE-NMe2(18:1(9Z)/22:0);PE-NMe2(20:0/20:1(11Z));PE-NMe2(20:1(11Z)/20:0);PE-NMe2…	29972.4	53223.8	39702	25514.1	70490.8	47003.1	85270.7	64547.9	79164.6	83613.3	112880	104728	66342.5	44317.7	88367.4	0.5015	down	0.00325174	0.0142484	1.2889
POS	POS_824.608_4.2125	824.608	4.2125	PC 39:4	80	C47H86NO8P	PC	Phosphatidylcholine				PC(15:0/22:1(13Z));PC(22:1(13Z)/15:0);PE(16:0/24:1(15Z));PE(16:1(9Z)/24:0);PE(18:0/22:1(13Z));PE(18:1(11Z)/22:0);PE(18:1(9Z)/22:0);PE(20:0/20:1(11Z));PE(20:1(11Z)/20:0);PE(22:0/18:1(11Z));PE(22:0/18:1(9Z));PE(22:1(13Z)/18:0);PE(24:0/16:1(9Z));PE(24:1(15Z)/16:0);PE-NMe(15:0/24:1(15Z));PE-NMe(24:1(15Z)/15:0);PE-NMe2(14:0/24:1(15Z));PE-NMe2(14:1(9Z)/24:0);PE-NMe2(16:0/22:1(13Z));PE-NMe2(16:1(9Z)/22:…	5698.28	16225	5495.17	6021.7	4794.25	5785.22	16081.1	12612.2	13567.1	13471.8	20547.9	11359.4	10971.6	7336.61	14606.6	0.5023	down	0.00622458	0.0236982	1.30216
POS	POS_829.711_7.3672	829.711	7.3672	SM(d18:1/25:0)	95.69	C48H98N2O6P1	SM	Sphingomyelin	Ceramide phosphocholines (sphingomyelins) [SP0301]	Phosphosphingolipids [SP03]	Sphingolipids [SP]	"4alpha-Formyl-5alpha-cholesta-8-en-3beta-ol;4Alpha-hydroxymethyl-5alpha-cholesta-8,24-dien-3beta-ol;Ergostane-3,6-dione;Stenocereol;1-Phenyl-1,3-docosanedione;(3beta,5alpha,7alpha)-14-Methylcholesta-9(11),24-diene-3,7-diol;4&#945;-hydroxymethyl-5&#945;-cholesta-8,24-dien-3&#946;-ol;Esters;6beta-Hydroxycampest-4-ene-3-one;SM(d18:1/25:0);SM(d19:1/24:0);SM(d19:0/24:1(15Z));SM(d20:1/23:0);DG(24:0/24…	722917	1.21912e+06	705885	805979	862462	863202	1.75393e+06	1.4846e+06	1.56891e+06	1.5672e+06	2.65393e+06	1.27041e+06	1.28988e+06	863261	1.7165e+06	0.5029	down	0.000478664	0.0031763	1.28371
POS	POS_548.535_6.6893	548.535	6.6893	Cer 18:1;O2/18:0	100	C36H71NO3	Cer_NS	Ceramide non-hydroxyfatty acid-sphingosine					22736	28031.8	21767.2	24586.8	29831.7	24444.6	43902.7	41252.8	43245.9	41919.4	68740	59929.9	37532.4	25233	49831.8	0.5064	down	0.000196419	0.00156887	1.30555
POS	POS_699.536_4.991	699.536	4.991	SM 25:3;2O/9:0	72.76	C39H75N2O6P	SM	Sphingomyelin	Ceramide phosphocholines (sphingomyelins) [SP0301]	Phosphosphingolipids [SP03]	Sphingolipids [SP]	DG(20:1n9/0:0/18:2n6);SM(d18:0/14:0)	7397.09	8211.9	7882.35	8552.97	8131.2	8615.84	19718.2	15303.1	19404.7	15509.1	7485.14	18483	12057.9	8131.89	15983.9	0.5088	down	0.00788318	0.0284582	1.19878
NEG	NEG_724.524_6.2241	724.524	6.2241	PE O-16:0_20:4	100	C41H76NO7P	EtherPE	Ether-linked phosphatidylethanolamine				"PE(18:2(9Z,12Z)/P-18:1(11Z));PE(18:2(9Z,12Z)/P-18:1(9Z));PE(18:3(6Z,9Z,12Z)/P-18:0);PE(18:3(9Z,12Z,15Z)/P-18:0);PE(20:3(5Z,8Z,11Z)/P-16:0);PE(20:3(8Z,11Z,14Z)/P-16:0);PE(P-16:0/20:3(5Z,8Z,11Z));PE(P-16:0/20:3(8Z,11Z,14Z));PE(P-18:0/18:3(6Z,9Z,12Z));PE(P-18:0/18:3(9Z,12Z,15Z));PE(P-18:1(11Z)/18:2(9Z,12Z));PE(P-18:1(9Z)/18:2(9Z,12Z))"	9857.03	7099.54	11106.3	10801.4	5935.22	11467.6	15113.3	20270.9	16296.1	20282	19317.7	19228.6	13898	9377.86	18418.1	0.5092	down	0.000748107	0.00448605	1.31701
POS	POS_938.772_7.4344	938.772	7.4344	TG 19:1_20:3_17:3;O	100	C59H100O7	OxTG	Oxidized triglyceride					28390.8	51834.6	26479	30700.7	32200.3	26603	43522.7	67697.4	62200.2	57839.9	64723.5	89134.2	48443.9	32701.4	64186.3	0.5095	down	0.000669768	0.00411495	1.27375
POS	POS_754.536_5.3262	754.536	5.3262	PC 16:0_18:4	96.33	C42H76NO8P	PC	Phosphatidylcholine	Diacylglycerophosphocholines [GP0101]	Glycerophosphocholines [GP01]	Glycerophospholipids [GP]	"PC(14:0/20:4(5Z,8Z,11Z,14Z));PC(14:0/20:4(8Z,11Z,14Z,17Z));PC(14:1(9Z)/20:3(5Z,8Z,11Z));PC(14:1(9Z)/20:3(8Z,11Z,14Z));PC(16:0/18:4(6Z,9Z,12Z,15Z));PC(16:1(9Z)/18:3(6Z,9Z,12Z));PC(16:1(9Z)/18:3(9Z,12Z,15Z));PC(18:3(6Z,9Z,12Z)/16:1(9Z));PC(18:3(9Z,12Z,15Z)/16:1(9Z));PC(18:4(6Z,9Z,12Z,15Z)/16:0);PC(20:3(5Z,8Z,11Z)/14:1(9Z));PC(20:3(8Z,11Z,14Z)/14:1(9Z));PC(20:4(5Z,8Z,11Z,14Z)/14:0);PC(20:4(8Z,11Z,1…	290869	222748	273381	310234	261337	305455	584727	752224	773326	510141	253125	383606	410098	277337	542858	0.5109	down	0.0161975	0.049814	1.12548
POS	POS_856.573_5.1588	856.573	5.1588	"PC(18:2(9Z,12Z)/PGD1)"	77.33	C46H82NO11P	PC	Phosphatidylcholine	Diacylglycerophosphocholines [GP0101]	Glycerophosphocholines [GP01]	Glycerophospholipids [GP]	"PS(20:0/20:3(5Z,8Z,11Z)-O(14R,15S));PS(20:3(5Z,8Z,11Z)-O(14R,15S)/20:0);PS(20:0/20:3(5Z,8Z,14Z)-O(11S,12R));PS(20:3(5Z,8Z,14Z)-O(11S,12R)/20:0);PS(20:0/20:3(5Z,11Z,14Z)-O(8,9));PS(20:3(5Z,11Z,14Z)-O(8,9)/20:0);PS(20:0/20:3(8Z,11Z,14Z)-O(5,6));PS(20:3(8Z,11Z,14Z)-O(5,6)/20:0);PS(20:0/20:4(5Z,8Z,11Z,14Z)-OH(20));PS(20:4(5Z,8Z,11Z,14Z)-OH(20)/20:0);PS(20:0/20:4(6E,8Z,11Z,14Z)-OH(5S));PS(20:4(6E,8Z,…	16341.6	28582.3	23028.3	18270.6	26367.2	18845.2	46488.3	43768.2	45548.9	45494.7	15341.3	60279.3	32363	21905.9	42820.1	0.5116	down	0.0245809	0.0686239	1.08868
POS	POS_853.717_7.3667	853.717	7.3667	SM 30:3;2O/15:0	72.09	C50H97N2O6P	SM	Sphingomyelin	Ceramide phosphocholines (sphingomyelins) [SP0301]	Phosphosphingolipids [SP03]	Sphingolipids [SP]		12088.7	17030.5	9718.09	11204.9	13423.1	13539.1	22517.3	25795.3	28355.4	28234.7	24158.8	21117.8	18932	12834.1	25029.9	0.5127	down	6.17733e-05	0.000641665	1.32925
POS	POS_752.546_6.1354	752.546	6.1354	"PE(P-18:0/20:4(5Z,8Z,11Z,14Z))"	81.2	C43H78NO7P	PE	Phosphatidylethanolamine	"1Z-alkenyl,2-acylglycerophosphoethanolamines [GP0203]"	Glycerophosphoethanolamines [GP02]	Glycerophospholipids [GP]	"PA(18:0/18:1(12Z)-2OH(9,10));PA(18:1(12Z)-2OH(9,10)/18:0);PA(i-18:0/18:1(12Z)-2OH(9,10));PA(18:1(12Z)-2OH(9,10)/i-18:0)"	84643.9	86048.8	92756.1	86206.6	112824	85916.3	126570	132888	145470	146198	285241	228383	134429	91399.4	177458	0.515	down	0.0046611	0.0189247	1.19358
NEG	NEG_559.472_3.3704	559.472	3.3704	FAHFA 36:3	74.99	C36H64O4	FAHFA	Fatty acid ester of hydroxyl fatty acid				"2-Hexadec-7-enylicosa-8,11-dienedioic acid;Linoleic acid;(9E,11E)-Octadecadienoic acid;Linoelaidic acid;Mangiferic acid;Linalyl caprylate;Ethyl 2E,4Z-hexadecadienoate;5-Octadecynoic acid;Dihomolinoleic acid;6Z,9Z-octadecadienoic acid;Octadecadienoate;Octadeca-10,12-dienoic acid;17-Octadecynoic acid;7-Octadecynoic acid;8,12-Octadecadienoic acid;Octadeca-9,11-dienoic acid;9Z,12E-Octadecadienoic ac…	18003.7	13887.5	13749.2	20782.6	12083.8	19894	37650.9	34415.5	34586.6	33675.8	28888.2	21724.8	24111.9	16400.1	31823.6	0.5153	down	0.00029141	0.00214764	1.2815
POS	POS_802.627_6.7226	802.627	6.7226	PC 17:0_20:3_d5_ISTD	88.93	C45H84NO8P	PC|PE		Diacylglycerophosphocholines [GP0101]	Glycerophosphocholines [GP01]	Glycerophospholipids [GP]	"PC(15:0/22:1(13Z));PC(22:1(13Z)/15:0);PE(16:0/24:1(15Z));PE(16:1(9Z)/24:0);PE(18:0/22:1(13Z));PE(18:1(11Z)/22:0);PE(18:1(9Z)/22:0);PE(20:0/20:1(11Z));PE(20:1(11Z)/20:0);PE(22:0/18:1(11Z));PE(22:0/18:1(9Z));PE(22:1(13Z)/18:0);PE(24:0/16:1(9Z));PE(24:1(15Z)/16:0);PE-NMe(15:0/24:1(15Z));PE-NMe(24:1(15Z)/15:0);PE-NMe2(14:0/24:1(15Z));PE-NMe2(14:1(9Z)/24:0);PE-NMe2(16:0/22:1(13Z));PE-NMe2(16:1(9Z)/22…	290116	381565	304809	340526	484414	299621	663106	616525	602728	594288	852668	736685	513921	350175	677667	0.5167	down	7.53708e-05	0.000754785	1.31196
POS	POS_742.569_6.0954	742.569	6.0954	Curcumene-alpha	75.79	C42H80NO7P			"1-alkyl,2-acylglycerophosphocholines [GP0102]"	Glycerophosphocholines [GP01]	Glycerophospholipids [GP]	"PC(16:1(9Z)/P-18:1(11Z));PC(16:1(9Z)/P-18:1(9Z));PC(18:2(9Z,12Z)/P-16:0);PC(P-16:0/18:2(9Z,12Z));PC(P-18:1(11Z)/16:1(9Z));PC(P-18:1(9Z)/16:1(9Z));PC(O-16:1(9Z)/18:2(9Z,12Z));Curcumene-alpha;Cyanidin 3,5-O-diglucoside"	434156	461979	481222	466440	493382	461740	979533	996050	991394	989015	510485	916396	681816	466487	897145	0.52	down	0.00190975	0.00940438	1.25447
POS	POS_650.641_7.5972	650.641	7.5972	Cer 18:1;O2/24:0	100	C42H83NO3	Cer_NS	Ceramide non-hydroxyfatty acid-sphingosine				Cer(d18:1/24:0);Cer(d18:0/24:1(15Z))	468006	694364	485594	539189	496176	557009	1.03783e+06	878836	1.01084e+06	1.01671e+06	1.51251e+06	764409	788456	540056	1.03686e+06	0.5209	down	0.000335721	0.00239588	1.26346
NEG	NEG_1151.71_5.2124	1151.71	5.2124	GM3 d34:1	92.59	C57H104N2O21	GM3	Ganglioside GM3				"Ganglioside GM3 (d18:1/16:0);CL(8:0/8:0/16:0/18:2(9Z,11Z));CL(8:0/8:0/i-16:0/18:2(9Z,11Z));CL(8:0/10:0/14:0/18:2(9Z,11Z));CL(8:0/10:0/i-14:0/18:2(9Z,11Z));CL(8:0/11:0/13:0/18:2(9Z,11Z));CL(8:0/11:0/a-13:0/18:2(9Z,11Z));CL(8:0/11:0/i-13:0/18:2(9Z,11Z));CL(8:0/12:0/12:0/18:2(9Z,11Z));CL(8:0/12:0/i-12:0/18:2(9Z,11Z));CL(8:0/i-12:0/i-12:0/18:2(9Z,11Z));CL(10:0/10:0/12:0/18:2(9Z,11Z));CL(10:0/10:0/i-…	65588.4	46125	63370.6	85318.2	43679.3	81050.6	127113	130400	120714	135347	120446	105172	93693.5	64188.7	123198	0.521	down	0.00125694	0.00674992	1.30016
POS	POS_572.368_2.3967	572.368	2.3967	LPC 22:4-SN1	72.92	C30H54NO7P	LPC	Lysophophatidylcholine	Monoacylglycerophosphocholines [GP0105]	Glycerophosphocholines [GP01]	Glycerophospholipids [GP]	"LysoPC(22:4(7Z,10Z,13Z,16Z)/0:0);LysoPC(20:1(11Z)/0:0);PC(18:1(9Z)e/2:0);Chenodeoxycholylcitrulline;Deoxycholylcitrulline;1-(9Z-Eicosenoyl)-sn-glycero-3-phosphocholine"	94206.5	81817	86145.1	97208.8	116731	25935	161088	169424	152022	148101	149273	183728	122140	83673.9	160606	0.521	down	0.0196032	0.0575012	1.23684
POS	POS_896.763_8.1312	896.763	8.1312	"TG(16:0/18:2(9Z,12Z)/20:4(5Z,8Z,11Z,14Z))"	70.24	C57H98O6	TG	Triacylglycerol	Triacylglycerols [GL0301]	Triradylglycerols [GL03]	Glycerolipids [GL]	"TG(16:0/18:2(9Z,12Z)/20:4(5Z,8Z,11Z,14Z));TG(16:1(9Z)/18:1(9Z)/20:4(5Z,8Z,11Z,14Z));TG(18:2(9Z,12Z)/18:2(9Z,12Z)/18:2(9Z,12Z));TG(16:0/16:0/22:6(4Z,7Z,10Z,13Z,16Z,19Z));TG(18:1(9Z)/16:0/20:5(5Z,8Z,11Z,14Z,17Z));TG(18:2(9Z,12Z)/18:1(9Z)/18:3(6Z,9Z,12Z));TG(18:2(9Z,12Z)/18:1(9Z)/18:3(9Z,12Z,15Z));TG(18:3(9Z,12Z,15Z)/18:0/18:3(9Z,12Z,15Z));TG(14:0/18:0/22:6(4Z,7Z,10Z,13Z,16Z,19Z));TG(14:0/18:1(11Z)…	1.03686e+07	1.29097e+07	1.07723e+07	1.10434e+07	9.16416e+06	1.15136e+07	1.72366e+07	20176121	2.29261e+07	2.10076e+07	2.7513e+07	1.73057e+07	1.59947e+07	1.0962e+07	2.10275e+07	0.5213	down	5.15655e-05	0.000555669	1.29733
POS	POS_868.733_7.9225	868.733	7.9225	"TG(18:3(9Z,12Z,15Z)/16:0/18:3(9Z,12Z,15Z))"	72.63	C55H94O6	TG	Triacylglycerol	Triacylglycerols [GL0301]	Triradylglycerols [GL03]	Glycerolipids [GL]	"TG(16:1(9Z)/16:1(9Z)/20:4(5Z,8Z,11Z,14Z));TG(18:2(9Z,12Z)/14:0/20:4(5Z,8Z,11Z,14Z));TG(18:3(9Z,12Z,15Z)/16:0/18:3(9Z,12Z,15Z));TG(14:0/16:0/22:6(4Z,7Z,10Z,13Z,16Z,19Z));TG(14:0/16:1(9Z)/22:5(4Z,7Z,10Z,13Z,16Z));TG(14:0/16:1(9Z)/22:5(7Z,10Z,13Z,16Z,19Z));TG(14:0/18:1(11Z)/20:5(5Z,8Z,11Z,14Z,17Z));TG(14:0/18:1(9Z)/20:5(5Z,8Z,11Z,14Z,17Z));TG(14:0/20:3(5Z,8Z,11Z)/18:3(6Z,9Z,12Z));TG(14:0/20:3(5Z,8Z…	1.35225e+06	1.91479e+06	1.31241e+06	1.44735e+06	1.28938e+06	1.50901e+06	2.29531e+06	2.75741e+06	2.92831e+06	2.79351e+06	3.94504e+06	2.20255e+06	2.14561e+06	1.47087e+06	2.82035e+06	0.5215	down	0.000163877	0.00136618	1.27464
POS	POS_661.523_5.0249	661.523	5.0249	SM 23:1;2O/8:0	75.27	C36H73N2O6P	SM	Sphingomyelin	Ceramide phosphocholines (sphingomyelins) [SP0301]	Phosphosphingolipids [SP03]	Sphingolipids [SP]	"Docosapentaenoic acid (22n-6);Docosapentaenoic acid (22n-3);Ethyl abietate;ent-16-Kauren-19-ol acetate;1-Phenyl-1,3-hexadecanedione;2-Methyl-5-(8,11-pentadecadienyl)-1,3-benzenediol;4,8,12,15,19-Docosapentaenoic acid;Ethyl icosapentate;4,7,10,13,16-Docosapentaenoic acid;7,10,13,16,19-Docosapentaenoic acid;Eicosapentaenoic acid ethyl ester;Docosa-2,4,6,8,10-pentaenoic acid;Eicosapentaenoic ethyl …	8236.38	8140.29	8496.45	8772.48	13107.7	9186.18	22932.2	18933.6	19651.8	19474.6	6933.61	19148.6	13584.5	9323.25	17845.7	0.5224	down	0.0183321	0.0547326	1.10033
NEG	NEG_700.526_6.5317	700.526	6.5317	PE(P-16:0/18:1)	70.36	C39H75N1O7P1	PE	Phosphatidylethanolamine				PE(16:0/P-18:1(11Z));PE(16:0/P-18:1(9Z));PE(16:1(9Z)/P-18:0);PE(18:1(11Z)/P-16:0);PE(18:1(9Z)/P-16:0);PEP-16:0/18:1(11Z));PE(P-16:0/18:1(9Z));PE(P-18:0/16:1(9Z));PE(P-18:1(11Z)/16:0);PE(P-18:1(9Z)/16:0);Cer(d20:1/PGF1alpha)	8516.81	7169.78	9339.47	8826.29	7149.93	9402.9	15533.9	16899.5	16553.2	17220.6	15536.8	14711.9	12238.4	8400.86	16076	0.5226	down	6.26731e-06	0.00011069	1.33882
NEG	NEG_540.332_2.3697	540.332	2.3697	LPC 16:0	92.53	C24H50NO7P	LPC	Lysophophatidylcholine	Monoacylglycerophosphocholines [GP0105]	Glycerophosphocholines [GP01]	Glycerophospholipids [GP]	LysoPC(16:0/0:0);LysoPC(0:0/16:0);1-Nonadecanoyl-glycero-3-phosphoethanolamine;1-Palmitoylphosphatidylcholine;LysoPC(15:0/0:0);LysoPE(0:0/18:0);LysoPE(18:0/0:0);Palmitoyl Ara-C	1.39737e+06	1.13737e+06	1.30103e+06	1.52049e+06	1.31576e+06	1.63815e+06	2.97767e+06	2.88923e+06	2.59449e+06	2.7883e+06	2.49297e+06	2.15724e+06	2.01751e+06	1.38503e+06	2.64998e+06	0.5227	down	3.79892e-06	7.59403e-05	1.32076
POS	POS_646.644_7.6962	646.644	7.6962	Cer 18:1;O2/25:0	100	C43H85NO3	Cer_NS	Ceramide non-hydroxyfatty acid-sphingosine					20810	37899.6	21852.5	24631.6	29258.1	24322.9	50436.7	42795.6	44685.1	45393.4	77086.7	42945.1	38509.8	26462.4	50557.1	0.5234	down	0.000536253	0.00346719	1.247
POS	POS_735.563_5.0202	735.563	5.0202	SM 37:6;O2	86.2	C42H75N2O6P	SM	Sphingomyelin				PC(15:0/16:1(9Z));PC(16:1(9Z)/15:0);PE(14:0/20:1(11Z));PE(14:1(9Z)/20:0);PE(16:0/18:1(11Z));PE(16:0/18:1(9Z));PE(16:1(9Z)/18:0);PE(18:0/16:1(9Z));PE(18:1(11Z)/16:0);PE(18:1(9Z)/16:0);PE(20:0/14:1(9Z));PE(20:1(11Z)/14:0);PE-NMe(15:0/18:1(9Z));PE-NMe(15:0/18:1(11Z));PE-NMe(18:1(11Z)/15:0);PE-NMe(18:1(9Z)/15:0);PE-NMe2(16:0/16:1(9Z));PE-NMe2(14:0/18:1(9Z));PE-NMe2(14:0/18:1(11Z));PE-NMe2(14:1(9Z)/18…	2888.22	4515.72	2812.02	2566.73	2870.82	2823.54	6544.2	5714.76	6265.79	5067.52	6525.66	5033.54	4469.04	3079.51	5858.58	0.5256	down	0.000118241	0.00106116	1.30045
NEG	NEG_833.519_5.4164	833.519	5.4164	"PI(18:0/16:2(9Z,12Z))"	78.77	C43H79O13P	PI	Sphingolipids				"PI(16:0/18:2(9Z,12Z));PI(16:1(9Z)/18:1(11Z));PI(16:1(9Z)/18:1(9Z));PI(16:2(9Z,12Z)/18:0);PI(18:0/16:2(9Z,12Z));PG(a-17:0/PGF2alpha);PG(PGF2alpha/a-17:0);PG(a-17:0/PGE1);PG(PGE1/a-17:0);PG(a-17:0/PGD1);PG(PGD1/a-17:0);PG(i-17:0/PGF2alpha);PG(PGF2alpha/i-17:0);PG(i-17:0/PGE1);PG(PGE1/i-17:0);PG(i-17:0/PGD1);PG(PGD1/i-17:0);PG(i-19:0/5-iso PGF2VI);PG(5-iso PGF2VI/i-19:0);SM(d18:0/20:5(7Z,9Z,11E,13E…	40603	35098.3	42253.1	44508.1	36942.4	49761.6	79905.1	84097.3	79645.7	81393.4	77749.6	71272.2	60269.1	41527.7	79010.5	0.5256	down	9.52807e-06	0.000153533	1.33276
POS	POS_824.573_4.7244	824.573	4.7244	"PC(18:3(9,11,15)-OH(13)/20:2(11Z,14Z))"	71.99	C46H82NO9P	PC	Phosphatidylcholine	Diacylglycerophosphocholines [GP0101]	Glycerophosphocholines [GP01]	Glycerophospholipids [GP]	"PC(18:0/20:4(6E,8Z,11Z,14Z)+=O(5));PC(20:4(6E,8Z,11Z,14Z)+=O(5)/18:0);PC(18:0/20:4(5Z,8Z,11Z,13E)+=O(15));PC(20:4(5Z,8Z,11Z,13E)+=O(15)/18:0);PC(18:0/20:5(5Z,8Z,11Z,14Z,16E)-OH(18R));PC(20:5(5Z,8Z,11Z,14Z,16E)-OH(18R)/18:0);PC(18:0/20:5(5Z,8Z,11Z,14Z,16E)-OH(18));PC(20:5(5Z,8Z,11Z,14Z,16E)-OH(18)/18:0);PC(18:0/20:5(5Z,8Z,10E,14Z,17Z)-OH(12));PC(20:5(5Z,8Z,10E,14Z,17Z)-OH(12)/18:0);PC(18:0/20:5(6…	10140.4	25552.2	21220.7	9151.59	32578.4	25080.2	42951.4	39881.2	38092.4	23535.6	38095.1	51738.8	29834.8	20620.6	39049.1	0.5281	down	0.019503	0.0572718	1.18119
POS	POS_524.37_3.0389	524.37	3.0389	1-Stearoyl-Sn-Glycerol-3-Phosphocholine	99.67	C26H54NO7P	lysoPC|LPC		Monoacylglycerophosphocholines [GP0105]	Glycerophosphocholines [GP01]	Glycerophospholipids [GP]	"LysoPC(18:0/0:0);LysoPC(0:0/18:0);Platelet-activating factor;2-Lysophosphatidylcholine;(9Z,12Z,15Z,18Z,21Z)-Tetracosa-9,12,15,18,21-pentaenoylcarnitine;Chenodeoxycholylasparagine;Deoxycholylasparagine;Anadur"	2.98713e+07	2.68416e+07	3.03186e+07	3.099e+07	27236749	3.16687e+07	6.10774e+07	5.73228e+07	5.55165e+07	5.48559e+07	6.09249e+07	4.52427e+07	4.26556e+07	2.94878e+07	5.58234e+07	0.5282	down	1.47231e-06	3.73144e-05	1.32067
NEG	NEG_885.551_5.7602	885.551	5.7602	"PI(20:4(8Z,11Z,14Z,17Z)/18:0)"	96.65	C47H83O13P	PI	Sphingolipids	Diacylglycerophosphoinositols [GP0601]	Glycerophosphoinositols [GP06]	Glycerophospholipids [GP]	"PI(16:0/22:4(10Z,13Z,16Z,19Z));PI(16:0/22:4(7Z,10Z,13Z,16Z));PI(18:0/20:4(8Z,11Z,14Z,17Z));Muroctasin;PG(a-21:0/20:5(7Z,9Z,11E,13E,17Z)-3OH(5,6,15));PG(20:5(7Z,9Z,11E,13E,17Z)-3OH(5,6,15)/a-21:0);PG(i-21:0/20:5(7Z,9Z,11E,13E,17Z)-3OH(5,6,15));PG(20:5(7Z,9Z,11E,13E,17Z)-3OH(5,6,15)/i-21:0);PE(P-18:0/LTE4);PE(LTE4/P-18:0);PG(20:1(11Z)/20:3(5Z,8Z,11Z)-O(14R,15S));PG(20:3(5Z,8Z,11Z)-O(14R,15S)/20:1(…	220480	192419	229193	229358	196386	272508	389690	449726	401516	445055	438014	410880	322935	223391	422480	0.5288	down	8.41945e-06	0.000139263	1.32557
NEG	NEG_295.227_1.8585	295.227	1.8585	FA 18:2;O	100	C18H32O3	OxFA	Oxidized fatty acid				"alpha-Dimorphecolic acid;9,10-Epoxyoctadecenoic acid;12,13-EpOME;(Z)-13-Oxo-9-octadecenoic acid;Avenoleic acid;12-Hydroxy-8,10-octadecadienoic acid;(10E,12Z)-9-HODE;(13S)-13-hydroxyoctadeca-9,11-dienoic acid;13-Hydroxyoctadeca-9,12-dienoic acid;18-Hydroxyoctadecadienoic acid;13-Hydroxyoctadeca-2,4-dienoic acid;9-Hydroxyoctadeca-2,4-dienoic acid;9-Hydroxylinoleic acid;11-(3-Pentyloxiran-2-yl)unde…	15810	12090.4	14362.4	15715.2	12247.9	15707.3	23969	32770.6	20473.1	31343.5	29404.3	24237.2	20677.6	14322.2	27032.9	0.5298	down	7.57507e-05	0.000757711	1.27327
POS	POS_704.551_6.5701	704.551	6.5701	LPE 34:1	70.6	C39H78NO7P	LPE	Lysophosphatidylethanolamine	Monoacylglycerophosphoethanolamines [GP0205]	Glycerophosphoethanolamines [GP02]	Glycerophospholipids [GP]	"DG(11D3/11M3/0:0);DG(11D3/9M5/0:0);DG(11M3/11D3/0:0);DG(11M3/9D5/0:0);DG(11M5/9D3/0:0);DG(9D3/11M5/0:0);DG(9D5/11M3/0:0);DG(9D5/9M5/0:0);DG(9M5/11D3/0:0);DG(9M5/9D5/0:0);DG(17:0/22:6(5Z,8E,10Z,13Z,15E,19Z)-2OH(7S, 17S)/0:0);DG(22:6(5Z,8E,10Z,13Z,15E,19Z)-2OH(7S, 17S)/17:0/0:0);DG(17:0/0:0/22:6(5Z,8E,10Z,13Z,15E,19Z)-2OH(7S, 17S));DG(22:6(5Z,8E,10Z,13Z,15E,19Z)-2OH(7S, 17S)/0:0/17:0);DG(17:0/22:6…	23021	31678.4	23528.1	24014.9	33546.3	24600.2	45334.6	59735.2	45490.9	48904.2	40391.6	61102.2	38445.6	26731.5	50159.8	0.5329	down	6.03586e-05	0.00063127	1.27052
NEG	NEG_868.606_6.4007	868.606	6.4007	PC 38:4	72.12	C46H84NO8P	PC	Phosphatidylcholine	Diacylglycerophosphocholines [GP0101]	Glycerophosphocholines [GP01]	Glycerophospholipids [GP]	"PS(18:2(9Z,12Z)/24:1(15Z));PS(18:3(6Z,9Z,12Z)/24:0);PS(18:3(9Z,12Z,15Z)/24:0);PS(20:1(11Z)/22:2(13Z,16Z));PS(20:2(11Z,14Z)/22:1(13Z));PS(20:3(5Z,8Z,11Z)/22:0);PS(20:3(8Z,11Z,14Z)/22:0);PS(22:0/20:3(5Z,8Z,11Z));PS(22:0/20:3(8Z,11Z,14Z));PS(22:1(13Z)/20:2(11Z,14Z));PS(22:2(13Z,16Z)/20:1(11Z));PS(24:0/18:3(6Z,9Z,12Z));PS(24:0/18:3(9Z,12Z,15Z));PS(24:1(15Z)/18:2(9Z,12Z));PC(20:0/20:4(6Z,8E,10E,14Z)-…	22087.8	18546.5	21076.6	22728.2	20121.3	25827.4	40034.6	42139.8	42151.4	42999.6	40178.9	36994.4	31240.5	21731.3	40749.8	0.5333	down	4.07452e-06	8.0091e-05	1.31961
POS	POS_733.583_5.3372	733.583	5.3372	SM 35:1;3O	83.59	C40H81N2O7P	SM	Sphingomyelin	Ceramide phosphocholines (sphingomyelins) [SP0301]	Phosphosphingolipids [SP03]	Sphingolipids [SP]	PC(14:0/P-18:1(11Z));PC(14:0/P-18:1(9Z));PC(14:1(9Z)/P-18:0);PC(16:1(9Z)/P-16:0);PC(P-16:0/16:1(9Z));PC(P-18:0/14:1(9Z));PC(P-18:1(11Z)/14:0);PC(P-18:1(9Z)/14:0);PC(O-16:1(9Z)/16:1(9Z));Carotene-zeta	1429.95	1418.29	1317.25	1676.77	1552.87	761.07	2698.35	1960.84	2334.64	2246.02	3924.36	2103.81	1952.02	1359.37	2544.67	0.5342	down	0.00229392	0.0108689	1.18778
POS	POS_898.778_8.2546	898.778	8.2546	"TG(18:2(9Z,12Z)/18:0/18:3(6Z,9Z,12Z))"	70.21	C57H100O6	TG	Triacylglycerol	Triacylglycerols [GL0301]	Triradylglycerols [GL03]	Glycerolipids [GL]	"TG(16:0/18:1(9Z)/20:4(5Z,8Z,11Z,14Z));TG(16:1(9Z)/18:0/20:4(5Z,8Z,11Z,14Z));TG(18:1(9Z)/18:2(9Z,12Z)/18:2(9Z,12Z));TG(18:1(11Z)/16:0/20:4(5Z,8Z,11Z,14Z));TG(18:1(9Z)/18:1(9Z)/18:3(6Z,9Z,12Z));TG(18:1(9Z)/18:1(9Z)/18:3(9Z,12Z,15Z));TG(18:2(9Z,12Z)/18:0/18:3(9Z,12Z,15Z));TG(18:2(9Z,12Z)/18:1(11Z)/18:2(9Z,12Z));Glycerol 1,2-di-(9Z,12Z-octadecadienoate) 3-(9Z-octadecenoate);Glycerol 1,3-di-(9Z,12Z-o…	1.54564e+07	1.76102e+07	1.58486e+07	1.63761e+07	1.29979e+07	1.72074e+07	2.48847e+07	2.9589e+07	3.1792e+07	3.07763e+07	3.56173e+07	2.58627e+07	2.28349e+07	1.59161e+07	2.97537e+07	0.5349	down	6.25702e-06	0.000110583	1.29083
POS	POS_912.756_7.1928	912.756	7.1928	PC 26:0_19:2	71	C53H102NO8P	PC	Phosphatidylcholine	Diacylglycerophosphocholines [GP0101]	Glycerophosphocholines [GP01]	Glycerophospholipids [GP]		71180.8	84078.4	73113.3	36635.7	110109	76104.7	139423	145937	150545	84994.6	208821	107717	107388	75203.7	139573	0.5388	down	0.00934289	0.0324622	1.13131
POS	POS_426.346_2.0533	426.346	2.0533	2-Hydroxyhexadecanoylcarnitine	79.03	C25H47NO4			Fatty acyl carnitines [FA0707]	Fatty esters [FA07]	Fatty Acyls [FA]		1558.54	1587.9	1698.99	2206.91	2405.7	2102.41	4826.74	4567.96	4082.85	1449.53	2838.36	3636.52	2746.87	1926.74	3566.99	0.5402	down	0.0269333	0.0736446	1.02882
POS	POS_803.62_6.4516	803.62	6.4516	SM 18:2;2O/24:5	77.65	C47H83N2O6P	SM	Sphingomyelin	Ceramide phosphocholines (sphingomyelins) [SP0301]	Phosphosphingolipids [SP03]	Sphingolipids [SP]	"PC(18:1(9Z)/18:1(9Z));PC(14:0/22:2(13Z,16Z));PC(14:1(9Z)/22:1(13Z));PC(16:0/20:2(11Z,14Z));PC(16:1(9Z)/20:1(11Z));PC(18:0/18:2(9Z,12Z));PC(18:1(11Z)/18:1(11Z));PC(18:1(11Z)/18:1(9Z));PC(18:1(9Z)/18:1(11Z));PC(18:2(9Z,12Z)/18:0);PC(20:1(11Z)/16:1(9Z));PC(20:2(11Z,14Z)/16:0);PC(22:1(13Z)/14:1(9Z));PC(22:2(13Z,16Z)/14:0);PE-NMe(14:1(9Z)/24:1(15Z));PE-NMe(16:0/22:2(13Z,16Z));PE-NMe(16:1(9Z)/22:1(13Z…	14016.8	19454.5	13956.9	15980.2	20524.9	14916.8	26475.6	31142.7	25177.1	26509.7	54056.4	19351.3	23463.6	16475	30452.1	0.541	down	0.00762142	0.0277449	1.11302
NEG	NEG_522.282_2.1647	522.282	2.1647	LPS 18:1	100	C24H46NO9P	LPS	Lysophosphatidylserine				"1-Oleoylglycerophosphoserine;LysoPS(18:1(9Z)/0:0);LysoPE(0:0/18:2(9Z,12Z));LysoPE(18:2(9Z,12Z)/0:0);VAPIPROST;Bucromarone"	2476.72	1607.13	2359.29	3325.78	1636.29	3126.29	4559.18	4311.31	4883.37	4802.46	4525.41	3749.3	3446.88	2421.92	4471.84	0.5416	down	0.00278408	0.0126526	1.24418
POS	POS_656.578_7.3722	656.578	7.3722	TG 10:0_10:0_16:0	99.3	C39H74O6	TG	Triacylglycerol				TG(12:0/12:0/12:0);TG(i-20:0/8:0/8:0);TG(20:0/8:0/8:0);TG(8:0/13:0/15:0);TG(10:0/12:0/14:0);TG(10:0/i-13:0/13:0);TG(8:0/12:0/16:0);TG(8:0/i-15:0/i-13:0);TG(10:0/a-13:0/a-13:0)[rac];TG(8:0/i-13:0/i-15:0);TG(10:0/13:0/13:0);TG(8:0/15:0/a-13:0)[rac];TG(10:0/13:0/i-13:0);TG(10:0/18:0/8:0);TG(8:0/i-14:0/i-14:0);TG(8:0/i-15:0/a-13:0)[rac];TG(8:0/a-15:0/a-13:0)[rac];TG(8:0/i-15:0/13:0);TG(8:0/a-13:0/i-1…	5002.71	7518.71	5826.83	6084.35	5840.28	6036.65	9108.04	10524.8	9943.26	10193.4	17430.9	9515.15	8585.42	6051.59	11119.3	0.5442	down	0.000806224	0.00476041	1.2003
POS	POS_747.557_5.6804	747.557	5.6804	"SM(d17:1/18:1(12Z)-2OH(9,10))"	75.91	C40H79N2O8P	SM	Sphingomyelin	Ceramide phosphocholines (sphingomyelins) [SP0301]	Phosphosphingolipids [SP03]	Sphingolipids [SP]	"xml:space=""preserve"">1,4-Pentanediamine, N4-(5-(hexyloxy)-6-methoxy-4-methyl-8-quinolinyl)-;Ibrexafungerp;Ibrexafungerp&#160;"	13426.8	12169.7	13987.2	12257.8	28520.8	13205.3	30877.2	32945.8	27902.2	27574.6	28234.7	23983.9	22090.5	15594.6	28586.4	0.5455	down	0.00332588	0.0144998	1.23861
POS	POS_801.681_7.1021	801.681	7.1021	SM 35:1;2O/6:0	96.92	C46H93N2O6P	SM	Sphingomyelin	Ceramide phosphocholines (sphingomyelins) [SP0301]	Phosphosphingolipids [SP03]	Sphingolipids [SP]	"7-Ketocholesterol;7a-Hydroxy-cholestene-3-one;Calcidiol;5,6-trans-25-Hydroxyvitamin D3;25-Hydroxytachysterol3;Alfacalcidol;(3beta,5alpha,6a)-Cholesta-8,14-diene-3,6-diol;1-Phenyl-1,3-heneicosanedione;5-Methyl-2,4-bis(3-methyl-2-butenyl)-6-(2-methyl-1-oxopropyl)-5-(4-methyl-3-pentenyl)cyclohexanone;5-(12,15-Heneicosadienyl)-1,3-benzenediol;3beta-Hydroxy-5-cholestenal;27alpha-Hydroxy-8-dehydrochol…	5.43557e+06	8.62905e+06	5.26349e+06	6.02358e+06	5.20664e+06	6.01439e+06	1.14758e+07	9.83206e+06	1.05477e+07	1.03326e+07	1.61827e+07	8.26992e+06	8.60113e+06	6.09545e+06	1.11068e+07	0.5488	down	0.000607894	0.00382967	1.19574
NEG	NEG_1177.72_5.2699	1177.72	5.2699	GM3 36:2;O2	100	C59H106N2O21	GM3	Ganglioside GM3				Ganglioside GM3 (d18:1/18:1(11Z))	3306.19	2474.71	3256.78	3838.97	2345.73	4108.33	5857.32	6330.26	5936.27	6470.53	5563.54	4917.46	4533.84	3221.79	5845.9	0.5511	down	0.000562713	0.00360234	1.24235
POS	POS_822.56_4.8423	822.56	4.8423	"PC(20:3(8Z,11Z,14Z)/18:3(9,11,15)-OH(13))"	70.03	C46H80NO9P	PC	Phosphatidylcholine	Diacylglycerophosphocholines [GP0101]	Glycerophosphocholines [GP01]	Glycerophospholipids [GP]	"PC(16:0/22:6(5Z,7Z,10Z,13Z,16Z,19Z)-OH(4));PC(22:6(5Z,7Z,10Z,13Z,16Z,19Z)-OH(4)/16:0);PC(16:0/22:6(4Z,8Z,10Z,13Z,16Z,19Z)-OH(7));PC(22:6(4Z,8Z,10Z,13Z,16Z,19Z)-OH(7)/16:0);PC(16:0/22:6(4Z,7Z,10Z,12E,16Z,19Z)-OH(14));PC(22:6(4Z,7Z,10Z,12E,16Z,19Z)-OH(14)/16:0);PC(16:0/22:6(4Z,7Z,10Z,13E,15E,19Z)-OH(17));PC(22:6(4Z,7Z,10Z,13E,15E,19Z)-OH(17)/16:0);PC(16:0/22:5(4Z,7Z,10Z,13Z,19Z)-O(16,17));PC(22:5(…	7169.39	8833.53	6875.35	6633.34	6733.24	7311.66	18553	11789.1	15355.2	14441	7073.87	11798.1	10213.9	7259.42	13168.4	0.5513	down	0.00771161	0.0279752	1.11355
POS	POS_716.591_6.5204	716.591	6.5204	Cer 20:3;O2/26:4	100	C46H79NO3	Cer_NS	Ceramide non-hydroxyfatty acid-sphingosine					11118.3	14311.8	13432.8	14165.9	22352.6	7101.23	22218.5	26504	28617.8	22867	19792.8	29310.3	19316.1	13747.1	24885	0.5524	down	0.0067595	0.0252709	1.18746
POS	POS_806.571_6.5275	806.571	6.5275	PC 20:2_18:4	72.17	C46H80NO8P	PC	Phosphatidylcholine	Diacylglycerophosphocholines [GP0101]	Glycerophosphocholines [GP01]	Glycerophospholipids [GP]	"PC(16:0/22:6(4Z,7Z,10Z,13Z,16Z,19Z));PC(16:1(9Z)/22:5(4Z,7Z,10Z,13Z,16Z));PC(16:1(9Z)/22:5(7Z,10Z,13Z,16Z,19Z));PC(18:1(11Z)/20:5(5Z,8Z,11Z,14Z,17Z));PC(18:1(9Z)/20:5(5Z,8Z,11Z,14Z,17Z));PC(18:2(9Z,12Z)/20:4(5Z,8Z,11Z,14Z));PC(18:2(9Z,12Z)/20:4(8Z,11Z,14Z,17Z));PC(18:3(6Z,9Z,12Z)/20:3(5Z,8Z,11Z));PC(18:3(6Z,9Z,12Z)/20:3(8Z,11Z,14Z));PC(18:3(9Z,12Z,15Z)/20:3(5Z,8Z,11Z));PC(18:3(9Z,12Z,15Z)/20:3(8…	12459.9	20828.8	12536.1	12846.5	14006.1	13533.6	20746.7	26432.7	29716.4	28602.8	29388.4	21020.5	20176.5	14368.5	25984.6	0.553	down	0.000214582	0.00168284	1.22001
POS	POS_816.571_4.4194	816.571	4.4194	"PC(18:2(9Z,12Z)/18:1(12Z)-2OH(9,10))"	71.1	C44H82NO10P	PC	Phosphatidylcholine	Diacylglycerophosphocholines [GP0101]	Glycerophosphocholines [GP01]	Glycerophospholipids [GP]	"PS(14:1(9Z)/24:1(15Z));PS(16:0/22:2(13Z,16Z));PS(16:1(9Z)/22:1(13Z));PS(18:0/20:2(11Z,14Z));PS(18:1(11Z)/20:1(11Z));PS(18:1(9Z)/20:1(11Z));PS(18:2(9Z,12Z)/20:0);PS(20:0/18:2(9Z,12Z));PS(20:1(11Z)/18:1(11Z));PS(20:1(11Z)/18:1(9Z));PS(20:2(11Z,14Z)/18:0);PS(22:1(13Z)/16:1(9Z));PS(22:2(13Z,16Z)/16:0);PS(24:1(15Z)/14:1(9Z));PC(16:0/20:3(8Z,11Z,14Z)-2OH(5,6));PC(20:3(8Z,11Z,14Z)-2OH(5,6)/16:0);PC(18:…	10977.7	22193.6	14175.2	9890.82	13644.2	11121.3	22682.4	20082.5	22063.8	19938.9	40626.2	22809.4	19183.8	13667.1	24700.5	0.5533	down	0.00414424	0.0172745	1.1375
NEG	NEG_861.54_5.443	861.54	5.443	PI(18:0/18:2)	81.46	C45H82O13P1	PI	Sphingolipids	Diacylglycerophosphoinositols [GP0601]	Glycerophosphoinositols [GP06]	Glycerophospholipids [GP]	"PG(18:0/22:4(7Z,10Z,13Z,16Z))"	5146.05	4268.05	5398.05	6302.07	4385.22	5786.4	10130.4	9978	8766.59	9930.21	8971.89	8705.5	7314.04	5214.31	9413.77	0.5539	down	5.23072e-05	0.000562026	1.26388
POS	POS_572.358_2.0817	572.358	2.0817	"LysoPC(22:4(7Z,10Z,13Z,16Z)/0:0)"	89.29	C30H54NO7P	lysoPC		Monoacylglycerophosphocholines [GP0105]	Glycerophosphocholines [GP01]	Glycerophospholipids [GP]	Cholyltyrosine;Chenodeoxycholyl-L-dopa;Deoxycholyl-L-dopa	4752.71	5886.84	3460.68	4325.92	8453.57	4733.84	9844.36	13879.4	9112.02	8708.26	8404.31	7040.95	7383.57	5268.93	9498.21	0.5547	down	0.00332975	0.0145142	1.15889
POS	POS_604.598_7.3261	604.598	7.3261	Cer 18:1;O2/22:0	100	C40H79NO3	Cer_NS	Ceramide non-hydroxyfatty acid-sphingosine					66655.1	104590	67681.4	78465.2	79558.9	80753.8	139655	122293	139207	136320	216380	105925	111457	79617.4	143297	0.5556	down	0.000959085	0.0054651	1.17112
POS	POS_820.522_5.5663	820.522	5.5663	PC(6 keto-PGF1alpha/14:0)	70.25	C42H78NO12P	PC	Phosphatidylcholine	Diacylglycerophosphocholines [GP0101]	Glycerophosphocholines [GP01]	Glycerophospholipids [GP]	"PC(14:0/22:4(7Z,10Z,13Z,16Z));PC(16:0/20:4(5Z,8Z,11Z,14Z));PC(16:0/20:4(8Z,11Z,14Z,17Z));PC(16:1(9Z)/20:3(5Z,8Z,11Z));PC(16:1(9Z)/20:3(8Z,11Z,14Z));PC(18:0/18:4(6Z,9Z,12Z,15Z));PC(18:1(11Z)/18:3(6Z,9Z,12Z));PC(18:1(11Z)/18:3(9Z,12Z,15Z));PC(18:1(9Z)/18:3(6Z,9Z,12Z));PC(18:1(9Z)/18:3(9Z,12Z,15Z));PC(18:2(9Z,12Z)/18:2(9Z,12Z));PC(18:3(6Z,9Z,12Z)/18:1(11Z));PC(18:3(6Z,9Z,12Z)/18:1(9Z));PC(18:3(9Z,1…	12771.4	7148.74	13052.1	13905.1	26024.9	15427	20494.3	25144	27293.2	25301.5	19326.1	40267	20512.9	14721.5	26304.3	0.5597	down	0.0134838	0.0430906	1.11727
POS	POS_622.609_7.3259	622.609	7.3259	Cer-NS d40:1	74.36	C40H79NO3	Cer-NS					Cer(d18:1/22:0);Cer(d18:0/22:1(13Z))	121226	210256	130006	145854	137122	143770	256646	209788	266350	260711	401959	184947	205720	148039	263400	0.562	down	0.00221492	0.0105757	1.13275
NEG	NEG_581.453_3.371	581.453	3.371	FAHFA 18:2/20:4	70.4	C38H62O4	FAHFA	Fatty acid ester of hydroxyl fatty acid					3690.33	3098.89	2815.34	4253.74	2546.64	4352.7	7012.69	6937.07	6716.02	6568.09	5777.47	3884.13	4804.43	3459.61	6149.25	0.5626	down	0.00123092	0.00664598	1.15496
POS	POS_646.607_7.0144	646.607	7.0144	Cer 19:0;O2/21:0	100	C40H81NO3	Cer_NDS	Ceramide non-hydroxyfatty acid-dihydrosphingosine				"Cer(d18:1/24:2(5Z,9Z));Cer(d18:2(4E,14Z)/24:1(15Z));Cer(d18:0/22:0)"	26669.1	60883.5	33261.3	27462	40437.8	31818.1	64137.3	59026.9	61597.8	54206.2	88630.3	63966.8	51008.1	36755.3	65260.9	0.5632	down	0.00309789	0.0137224	1.17392
NEG	NEG_528.308_2.4701	528.308	2.4701	LPE 22:4	100	C27H48NO7P	LPE	Lysophosphatidylethanolamine				"LysoPE(0:0/22:4(7Z,10Z,13Z,16Z));LysoPE(22:4(7Z,10Z,13Z,16Z)/0:0);Chenodeoxycholylthreonine;Deoxycholylthreonine;Glycolipids;Ebastine"	3134.45	2626.94	3151.44	3127.54	2877.71	3575.38	5768.38	5846.2	5411	5459.44	5713.18	4579.04	4272.56	3082.24	5462.87	0.5642	down	1.45667e-06	3.70628e-05	1.24746
POS	POS_702.53_6.5304	702.53	6.5304	PE P-16:0_18:1	100	C39H76NO7P	EtherPE	Ether-linked phosphatidylethanolamine				Cer(d20:1/6 keto-PGF1alpha);Cer(d20:1/TXB2);Cholesteryl (pyren-1-yl)hexanoate	40453.3	55220.7	41841.8	42907.1	39490.1	52511.3	91179.4	78397.7	88079	82283.4	77826.6	63750.8	62828.4	45404	80252.8	0.5658	down	2.64914e-05	0.000331808	1.22137
POS	POS_878.653_6.6883	878.653	6.6883	PC 21:2_22:3	72.99	C51H92NO8P	PC	Phosphatidylcholine	Diacylglycerophosphocholines [GP0101]	Glycerophosphocholines [GP01]	Glycerophospholipids [GP]	"DG(a-25:0/LTE4/0:0);DG(LTE4/a-25:0/0:0);DG(a-25:0/0:0/LTE4);DG(LTE4/0:0/a-25:0);PE(20:1(11Z)/24:1(15Z));PE(20:2(11Z,14Z)/24:0);PE(22:0/22:2(13Z,16Z));PE(22:1(13Z)/22:1(13Z));PE(22:2(13Z,16Z)/22:0);PE(24:0/20:2(11Z,14Z));PE(24:1(15Z)/20:1(11Z));PE-NMe2(18:1(11Z)/24:1(15Z));PE-NMe2(18:1(9Z)/24:1(15Z));PE-NMe2(18:2(9Z,12Z)/24:0);PE-NMe2(20:0/22:2(13Z,16Z));PE-NMe2(20:1(11Z)/22:1(13Z));PE-NMe2(20:2(…	7715.71	8988.63	10582.1	5009.65	10025.9	4167.77	15566.2	8166.44	14814.5	12244.5	18919.2	12429	10719.1	7748.29	13690	0.566	down	0.0137741	0.0438347	1.08054
POS	POS_890.572_5.5713	890.572	5.5713	PI 37:4	100	C46H81O13P	PI	Sphingolipids				"PS(20:0/PGF2alpha);PS(PGF2alpha/20:0);PS(20:0/PGE1);PS(PGE1/20:0);PS(20:0/PGD1);PS(PGD1/20:0);PS(20:1(11Z)/PGF1alpha);PS(PGF1alpha/20:1(11Z));PS(22:0/5-iso PGF2VI);PS(5-iso PGF2VI/22:0);PC(20:0/20:4(6E,8Z,11Z,14Z)+=O(5));PC(20:4(6E,8Z,11Z,14Z)+=O(5)/20:0);PC(20:0/20:4(5Z,8Z,11Z,13E)+=O(15));PC(20:4(5Z,8Z,11Z,13E)+=O(15)/20:0);PC(20:0/20:5(5Z,8Z,11Z,14Z,16E)-OH(18R));PC(20:5(5Z,8Z,11Z,14Z,16E)-OH…	10950.6	14287	7774.5	7297.92	20222.8	10149.6	19193.8	19805.8	16241.1	15686.8	25020.7	28067.8	16224.9	11780.4	20669.3	0.5699	down	0.0104495	0.0353363	1.11275
POS	POS_370.294_1.4962	370.294	1.4962	CAR 14:1	100	C21H39NO4	CAR	Acylcarnitine				"cis-5-Tetradecenoylcarnitine;(4Z)-Tetradec-4-enoylcarnitine;(7Z)-Tetradec-7-enoylcarnitine;N-Oleoyl-L-Serine;hydroxytetradecadienyl-l-carnitine;Tetradecenoylcarnitine;MG(0:0/18:3(6Z,9Z,12Z)/0:0);MG(0:0/18:3(9Z,12Z,15Z)/0:0);MG(18:3(6Z,9Z,12Z)/0:0/0:0);MG(18:3(9Z,12Z,15Z)/0:0/0:0);3-Ethyl-4-(9-hydroxy-4,6,8,10-tetramethyl-7-oxododec-4-en-2-yl)oxetan-2-one;1-Monolinolenoyl-rac-glycerol"	10406.6	8255.42	9978.08	11283.4	12493	11147.2	19949.1	18177	18439.5	18643.7	18678.2	17355.1	14567.2	10593.9	18540.4	0.5714	down	8.22042e-05	0.000804117	1.23518
POS	POS_788.604_6.2848	788.604	6.2848	PC 17:0_19:1	89.14	C44H86NO8P	PC	Phosphatidylcholine	Diacylglycerophosphocholines [GP0101]	Glycerophosphocholines [GP01]	Glycerophospholipids [GP]		7.42107e+06	7.58072e+06	7.72297e+06	7.21097e+06	6.62414e+06	7.4058e+06	1.12206e+07	1.07738e+07	1.19521e+07	1.1626e+07	2.14855e+07	9.86582e+06	1.00741e+07	7.32761e+06	1.28206e+07	0.5715	down	0.00530877	0.0209786	1.10569
POS	POS_512.332_1.9888	512.332	1.9888	Pro-HDCA	70.43	C29H47NO5						Chenodeoxycholylproline;Deoxycholylproline;PA(8:0/13:0);PA(8:0/a-13:0);PA(8:0/i-13:0);milbemycin beta3	9516.36	7416.75	8726.04	10912.4	17477.8	10492.7	18827.7	17923.2	19160.2	18368.9	16507.9	21806.7	14761.4	10757	18765.7	0.5732	down	0.00322644	0.0141567	1.18248
POS	POS_798.561_4.7868	798.561	4.7868	"PC(18:3(10,12,15)-OH(9)/18:1(9Z))"	74.57	C44H80NO9P	PC	Phosphatidylcholine	Diacylglycerophosphocholines [GP0101]	Glycerophosphocholines [GP01]	Glycerophospholipids [GP]	"PC(16:0/20:3(5Z,8Z,11Z)-O(14R,15S));PC(20:3(5Z,8Z,11Z)-O(14R,15S)/16:0);PC(16:0/20:3(5Z,8Z,14Z)-O(11S,12R));PC(20:3(5Z,8Z,14Z)-O(11S,12R)/16:0);PC(16:0/20:3(5Z,11Z,14Z)-O(8,9));PC(20:3(5Z,11Z,14Z)-O(8,9)/16:0);PC(16:0/20:3(8Z,11Z,14Z)-O(5,6));PC(20:3(8Z,11Z,14Z)-O(5,6)/16:0);PC(16:0/20:4(5Z,8Z,11Z,14Z)-OH(20));PC(20:4(5Z,8Z,11Z,14Z)-OH(20)/16:0);PC(16:0/20:4(6E,8Z,11Z,14Z)-OH(5S));PC(20:4(6E,8Z,…	11827.8	27353.7	17410.3	11457.8	23187.7	15624.8	32301.1	25438.5	36162.1	31673.6	30942	29699.1	24423.2	17810.3	31036	0.5739	down	0.00707704	0.0262011	1.15697
POS	POS_806.479_2.8902	806.479	2.8902	"PC(15:0/20:4(6Z,8E,10E,14Z)-2OH(5S,12R))"	70.3	C43H78NO10P	PC	Phosphatidylcholine	Diacylglycerophosphocholines [GP0101]	Glycerophosphocholines [GP01]	Glycerophospholipids [GP]	"PS(14:0/PGF2alpha);PS(PGF2alpha/14:0);PS(14:0/PGE1);PS(PGE1/14:0);PS(14:0/PGD1);PS(PGD1/14:0);PS(14:1(9Z)/PGF1alpha);PS(PGF1alpha/14:1(9Z));PS(16:0/5-iso PGF2VI);PS(5-iso PGF2VI/16:0);PC(14:0/20:4(6E,8Z,11Z,14Z)+=O(5));PC(20:4(6E,8Z,11Z,14Z)+=O(5)/14:0);PC(14:0/20:4(5Z,8Z,11Z,13E)+=O(15));PC(20:4(5Z,8Z,11Z,13E)+=O(15)/14:0);PC(14:0/20:5(5Z,8Z,11Z,14Z,16E)-OH(18R));PC(20:5(5Z,8Z,11Z,14Z,16E)-OH(1…	1393.47	2610.61	2807.56	860.682	1999.67	1827.48	4277.95	2421.33	2123.37	2715.7	3627.7	4782.32	2620.65	1916.58	3324.73	0.5765	down	0.0282344	0.0764047	1.02152
POS	POS_802.684_7.1018	802.684	7.1018	"TG(14:0/15:0/18:4(6Z,9Z,12Z,15Z))"	70.74	C50H88O6	TG	Triacylglycerol	Triacylglycerols [GL0301]	Triradylglycerols [GL03]	Glycerolipids [GL]	"SM(d16:1/24:1(15Z));SM(d18:1/22:1(13Z));TG(14:0/15:0/18:4(6Z,9Z,12Z,15Z));TG(14:0/18:4(6Z,9Z,12Z,15Z)/15:0);TG(15:0/14:0/18:4(6Z,9Z,12Z,15Z));TG(15:0/14:1(9Z)/18:3(6Z,9Z,12Z));TG(15:0/14:1(9Z)/18:3(9Z,12Z,15Z));TG(15:0/18:3(6Z,9Z,12Z)/14:1(9Z));TG(15:0/18:3(9Z,12Z,15Z)/14:1(9Z));TG(14:1(9Z)/15:0/18:3(6Z,9Z,12Z));TG(14:1(9Z)/15:0/18:3(9Z,12Z,15Z));SM(d18:2(4E,14Z)/22:0)"	2.50502e+06	3.93941e+06	2.43238e+06	2.74943e+06	2.45774e+06	2.78395e+06	4.96477e+06	4.42743e+06	4.38673e+06	4.43854e+06	7.28062e+06	3.70932e+06	3.83961e+06	2.81132e+06	4.8679e+06	0.5775	down	0.00123534	0.00666567	1.12514
NEG	NEG_867.551_5.4542	867.551	5.4542	PI O-38:6	71	C47H81O12P	EtherPI	Ether-linked phosphatidylinositol				"Tilmicosin;PA(22:0/PGF1alpha);PA(PGF1alpha/22:0);PA(i-22:0/PGF1alpha);PA(PGF1alpha/i-22:0);PG(a-21:0/18:1(12Z)-O(9S,10R));PG(18:1(12Z)-O(9S,10R)/a-21:0);PG(a-21:0/18:1(9Z)-O(12,13));PG(18:1(9Z)-O(12,13)/a-21:0);PG(i-21:0/18:1(12Z)-O(9S,10R));PG(18:1(12Z)-O(9S,10R)/i-21:0);PG(i-21:0/18:1(9Z)-O(12,13));PG(18:1(9Z)-O(12,13)/i-21:0)"	13624.7	11429.5	14670.7	14912.4	11643.7	14972.4	20547.8	24344.2	22772.6	25148.2	24749.9	22992.9	18484.1	13542.2	23426	0.5781	down	1.21057e-05	0.000183225	1.21882
POS	POS_412.208_0.8393	412.208	0.8393	PC 9:0	71.48	C17H34NO8P	PC	Phosphatidylcholine	Diacylglycerophosphocholines [GP0101]	Glycerophosphocholines [GP01]	Glycerophospholipids [GP]	"Carphenazine;Acetophenazine;1,2-Dihexanoyl-sn-glycero-3-phosphoethanolamine;Sacubitril;Dodecanedioylcarnitine;O-(11-Carboxyundecanoyl)carnitine;Curvacin A;1,3,8-Trihydroxy-4-methyl-2,7-diprenylxanthone"	1340.34	1941.89	2456.09	1019.47	2710.31	1031.41	2043.05	2734.92	2784.13	2978.97	2248.02	5322.07	2384.22	1749.92	3018.53	0.5797	down	0.0297396	0.0796795	1.01285
NEG	NEG_861.549_5.8472	861.549	5.8472	"PI(18:0/18:2(9Z,12Z))"	78.72	C45H83O13P	PI	Sphingolipids	Diacylglycerophosphoinositols [GP0601]	Glycerophosphoinositols [GP06]	Glycerophospholipids [GP]	"PI(16:0/20:2(11Z,14Z));PI(18:0/18:2(9Z,12Z));PG(a-21:0/5-iso PGF2VI);PG(5-iso PGF2VI/a-21:0);PG(i-19:0/PGF2alpha);PG(PGF2alpha/i-19:0);PG(i-19:0/PGE1);PG(PGE1/i-19:0);PG(i-19:0/PGD1);PG(PGD1/i-19:0);PG(i-21:0/5-iso PGF2VI);PG(5-iso PGF2VI/i-21:0);PG(18:0/22:4(7Z,10Z,13Z,16Z));SM(d20:1/PGE2);SM(d20:1/PGD2);SM(d20:1/20:4(7E,9E,11Z,13E)-3OH(5S,6R,15S));Aglepristone;PA(21:0/PGF2alpha);PA(PGF2alpha/2…	24253	21032.3	27537.2	24460.6	21975	30761.7	35623.6	42594.8	40064.3	48081.4	47831	43024	33936.6	25003.3	42869.8	0.5832	down	3.19861e-05	0.000383611	1.18951
POS	POS_597.444_3.9011	597.444	3.9011	DG 33:4	70.47	C36H62O5	DG	Diacylglycerol				"1,2-Epoxy-1,2,7,7',8,8',11,12-octahydro-psi,psi-carotene;DG(15:0/18:4(6Z,9Z,12Z,15Z)/0:0);DG(18:4(6Z,9Z,12Z,15Z)/15:0/0:0);DG(15:0/0:0/18:4n3)"	1865.62	2340.33	1604.92	1935.46	2155.8	2125.08	2946.86	3297.48	3510.28	3125.49	3353.74	4334.67	2716.31	2004.53	3428.09	0.5847	down	3.7974e-05	0.000437579	1.17762
POS	POS_826.612_4.7775	826.612	4.7775	PC 24:0_15:3	95	C47H88NO8P	PC	Phosphatidylcholine				"PE(22:0/P-18:0);PE(24:0/P-16:0);PE(P-16:0/24:0);PE(P-18:0/22:0);SM(d18:0/22:6(5Z,8E,10Z,13Z,15E,19Z)-2OH(7S, 17S));SM(d18:0/22:6(4Z,7Z,11E,13Z,15E,19Z)-2OH(10S,17));SM(d20:1/PGJ2)"	12066.4	19961	13235.4	14234.4	11976.9	14996.6	28176	21518.9	22039.8	21333.3	36993.3	17718.3	19520.9	14411.8	24629.9	0.5851	down	0.00313041	0.0138337	1.08123
POS	POS_813.576_5.0403	813.576	5.0403	SM(d19:1/PGE2)	72.61	C44H81N2O9P	SM	Sphingomyelin	Ceramide phosphocholines (sphingomyelins) [SP0301]	Phosphosphingolipids [SP03]	Sphingolipids [SP]	"SM(d19:0/20:5(7Z,9Z,11E,13E,17Z)-3OH(5,6,15));SM(d19:1/PGE2);SM(d19:1/PGD2);SM(d19:1/20:4(7E,9E,11Z,13E)-3OH(5S,6R,15S));PA(19:0/22:0);PA(20:0/21:0);PA(21:0/20:0);PA(22:0/19:0);PA(19:0/i-22:0);PA(20:0/a-21:0);PA(20:0/i-21:0);PA(21:0/i-20:0);PA(22:0/i-19:0);PA(a-21:0/20:0);PA(a-21:0/i-20:0);PA(a-25:0/16:0);PA(a-25:0/i-16:0);PA(i-19:0/22:0);PA(i-19:0/i-22:0);PA(i-20:0/21:0);PA(i-20:0/a-21:0);PA(i-…	4516.94	5056.46	4354.17	4317.19	5224.19	4104.68	7765.63	6472.02	6280.25	7354.94	12798.2	5687.62	6161.02	4595.6	7726.45	0.5948	down	0.00770869	0.0279685	1.03828
POS	POS_448.34_2.0015	448.34	2.0015	CAR 20:4	100	C27H45NO4	CAR	Acylcarnitine				"N-Stearoyl tyrosine;(8Z,11Z,14Z,17Z)-Icosa-8,11,14,17-tetraenoylcarnitine;Esculeogenin A;Oleoylcarnitine;Vaccenyl carnitine;Elaidic carnitine;2-Hydroxyhexadecanoylcarnitine;Octadecenoylcarnitine;Octadec-6-enoylcarnitine;(13Z)-Octadec-13-enoylcarnitine;(7Z)-Octadec-7-enoylcarnitine;3-Octadec-9-enoyloxy-4-(trimethylazaniumyl)butanoate;MG(24:6(6Z,9Z,12Z,15Z,18Z,21Z)/0:0/0:0);7alpha-Hydroxy-3-oxo-4-…	6692.29	4992.5	5706.36	7357.75	10054.6	6684.08	12147.3	12443.4	12996.1	11056.5	10586.4	10440.4	9263.13	6914.59	11611.7	0.5955	down	0.00168943	0.00853005	1.14357
POS	POS_799.665_6.7947	799.665	6.7947	SM 35:2;2O/6:0	98.09	C46H91N2O6P	SM	Sphingomyelin	Ceramide phosphocholines (sphingomyelins) [SP0301]	Phosphosphingolipids [SP03]	Sphingolipids [SP]	"SM(d17:1/24:1(15Z));SM(d18:1/23:1(9Z));SM(d18:2(4E,14Z)/23:0);DG(22:1(13Z)/24:1(15Z)/0:0);DG(22:2(13Z,16Z)/24:0/0:0);DG(24:0/22:2(13Z,16Z)/0:0);DG(24:1(15Z)/22:1(13Z)/0:0);TG(14:1(9Z)/14:1(9Z)/O-18:0);TG(14:1(9Z)/O-18:0/14:1(9Z));DG(24:0/0:0/22:2n6);DG(22:1n9/0:0/24:1n9)"	2.29479e+06	3.54387e+06	2.36177e+06	2.62214e+06	2.24488e+06	2.56274e+06	4.92063e+06	4.26579e+06	4.43803e+06	4.323e+06	4.56266e+06	3.67873e+06	3.48492e+06	2.60503e+06	4.3648e+06	0.5968	down	0.000169249	0.00140106	1.1602
POS	POS_468.307_1.8299	468.307	1.8299	LysoPC(14:0/0:0)	84.51	C22H46NO7P	lysoPC		Monoacylglycerophosphocholines [GP0105]	Glycerophosphocholines [GP01]	Glycerophospholipids [GP]	"LysoPC(14:0/0:0);Buprenorphine;1-Heptadecanoylglycerophosphoethanolamine;N-Arachidonoyl tyrosine;(1S,2S,6R,15S,16R)-5-(Cyclopropylmethyl)-16-(2-hydroxy-3,3-dimethylbutan-2-yl)-15-methoxy-13-oxa-5-azahexacyclo[13.2.2.12,8.01,6.02,14.012,20]icosa-8(20),9,11-trien-11-ol;3-Hydroxyheptadecanoylcarnitine;10-Hydroxyheptadecanoylcarnitine;11-Hydroxyheptadecanoylcarnitine;12-Hydroxyheptadecanoylcarnitine…	60440.2	55263.4	55157.8	64728.2	51487.5	65651.1	110249	95063.7	101981	99053.7	106811	77179.1	78588.8	58788	98389.5	0.5975	down	2.08003e-05	0.000276664	1.16172
POS	POS_782.561_5.1927	782.561	5.1927	"PC(P-18:1(9Z)/18:3(10,12,15)-OH(9))"	97.82	C44H80NO8P	PC	Phosphatidylcholine	Diacylglycerophosphocholines [GP0101]	Glycerophosphocholines [GP01]	Glycerophospholipids [GP]	PC(14:0/20:1(11Z));PC(14:1(9Z)/20:0);PC(16:0/18:1(11Z));PC(16:0/18:1(9Z));PC(16:1(9Z)/18:0);PC(18:0/16:1(9Z));PC(18:1(11Z)/16:0);PC(18:1(9Z)/16:0);PC(20:0/14:1(9Z));PC(20:1(11Z)/14:0);PE(15:0/22:1(13Z));PE(22:1(13Z)/15:0);PE-NMe(18:0/18:1(9Z));PE-NMe(18:0/18:1(11Z));PE-NMe(14:1(9Z)/22:0);PE-NMe(16:0/20:1(11Z));PE-NMe(16:1(9Z)/20:0);PE-NMe(14:0/22:1(13Z));PE-NMe(18:1(11Z)/18:0);PE-NMe(18:1(9Z)/18:…	198293	2.5936e+06	200515	228542	172252	209172	1.03186e+06	890786	951968	913537	1.4816e+06	754894	802251	600395	1.00411e+06	0.5979	down	0.0416539	0.103862	1.45838
POS	POS_620.593_7.0331	620.593	7.0331	Cer 18:2;O2/22:0	100	C40H77NO3	Cer_NS	Ceramide non-hydroxyfatty acid-sphingosine				Cer(d18:1/22:1(13Z))	7912.93	11810	8108.02	6975.84	15775.3	6399.01	12524.1	13440.4	20439.7	16456.8	16550.6	15790	12681.9	9496.84	15867	0.5985	down	0.00911395	0.031846	1.08082
POS	POS_823.598_6.0289	823.598	6.0289	"SM(d19:0/22:6(5Z,8E,10Z,13Z,15E,19Z)-2OH(7S, 17S))"	83	C46H83N2O8P	SM	Sphingomyelin	Ceramide phosphocholines (sphingomyelins) [SP0301]	Phosphosphingolipids [SP03]	Sphingolipids [SP]	"3-Hydroxyhexadecadienoylcarnitine;(9Z,12Z)-3-Hydroxyhexadecadienoylcarnitine;(6,12)-11-Hydroxyhexadecadienoylcarnitine;N-Oleoyl Glutamic acid;SM(d19:0/22:6(5Z,8E,10Z,13Z,15E,19Z)-2OH(7S, 17S));SM(d19:0/22:6(4Z,7Z,11E,13Z,15E,19Z)-2OH(10S,17));SM(d19:0/20:3(8Z,11Z,14Z)-2OH(5,6));PC(16:0/22:6(4Z,7Z,10Z,13Z,16Z,19Z));PC(16:1(9Z)/22:5(4Z,7Z,10Z,13Z,16Z));PC(16:1(9Z)/22:5(7Z,10Z,13Z,16Z,19Z));PC(18:1…	41795.4	83655.2	41923.7	48362.9	134263	34924.8	99517.7	101686	113185	109177	113272	106114	85656.5	64154.1	107159	0.5987	down	0.0296033	0.0794127	1.11342
POS	POS_852.555_5.4184	852.555	5.4184	PC 16:4_26:7	79.61	C50H78NO8P	PC	Phosphatidylcholine	Diacylglycerophosphocholines [GP0101]	Glycerophosphocholines [GP01]	Glycerophospholipids [GP]	"PC(20:5(5Z,8Z,11Z,14Z,17Z)/22:6(4Z,7Z,10Z,13Z,16Z,19Z));PC(22:6(4Z,7Z,10Z,13Z,16Z,19Z)/20:5(5Z,8Z,11Z,14Z,17Z));PE-NMe(22:5(4Z,7Z,10Z,13Z,16Z)/22:6(4Z,7Z,10Z,13Z,16Z,19Z));PE-NMe(22:6(4Z,7Z,10Z,13Z,16Z,19Z)/22:5(4Z,7Z,10Z,13Z,16Z));PE-NMe(22:6(4Z,7Z,10Z,13Z,16Z,19Z)/22:5(7Z,10Z,13Z,16Z,19Z));PE-NMe(22:5(7Z,10Z,13Z,16Z,19Z)/22:6(4Z,7Z,10Z,13Z,16Z,19Z));PE(20:0/20:3(6,8,11)-OH(5));PE(20:3(6,8,11)-…	78806.3	114985	80023.3	82405	113908	91426.7	168469	153627	153059	163058	107130	187096	124499	93592.3	155406	0.6022	down	0.000728217	0.00439592	1.09676
NEG	NEG_772.583_6.5733	772.583	6.5733	PC(20:1(11Z)/15:0)	72.3	C43H84NO8P	PC	Phosphatidylcholine	Diacylglycerophosphocholines [GP0101]	Glycerophosphocholines [GP01]	Glycerophospholipids [GP]	PC(15:0/20:1(11Z));PC(20:1(11Z)/15:0);PE(14:0/24:1(15Z));PE(14:1(9Z)/24:0);PE(16:0/22:1(13Z));PE(16:1(9Z)/22:0);PE(18:0/20:1(11Z));PE(18:1(11Z)/20:0);PE(18:1(9Z)/20:0);PE(20:0/18:1(11Z));PE(20:0/18:1(9Z));PE(20:1(11Z)/18:0);PE(22:0/16:1(9Z));PE(22:1(13Z)/16:0);PE(24:0/14:1(9Z));PE(24:1(15Z)/14:0);PE-NMe(15:0/22:1(13Z));PE-NMe(22:1(13Z)/15:0);PE-NMe2(18:0/18:1(9Z));PE-NMe2(18:0/18:1(11Z));PE-NMe2(…	25852.3	21119.2	26593.4	25918	22187.7	29498.1	32218.2	50758.9	48669.4	51825.2	33603.1	33056.4	33441.7	25194.8	41688.5	0.6044	down	0.00225716	0.0107359	1.06658
POS	POS_900.794_8.414	900.794	8.414	TG 18:1_18:1_18:2	72.39	C57H102O6						"TG(16:0/18:0/20:4(5Z,8Z,11Z,14Z));TG(18:0/18:2(9Z,12Z)/18:2(9Z,12Z));TG(16:1(9Z)/18:2(9Z,12Z)/20:1(11Z));TG(18:1(9Z)/18:1(9Z)/18:2(9Z,12Z));TG(18:1(9Z)/18:0/18:3(9Z,12Z,15Z));TG(18:1(9Z)/18:1(11Z)/18:2(9Z,12Z));TG(18:2(9Z,12Z)/16:0/20:2(11Z,14Z));Glycerol 1,2-di-(9Z,12Z-octadecadienoate) 3-octadecanoate;Glycerol 1,3-di-(9Z-octadecenoate) 2-(9Z,12Z-octadecadienoate);Glycerol 1,3-di-(9Z,12Z-octade…	1.50217e+07	1.61808e+07	1.66735e+07	1.66241e+07	1.28985e+07	1.77194e+07	2.16558e+07	2.60464e+07	2.82779e+07	2.64458e+07	3.12493e+07	2.30456e+07	2.09866e+07	1.5853e+07	2.61201e+07	0.6069	down	4.4028e-05	0.00049013	1.13386
POS	POS_879.736_8.0571	879.736	8.0571	"1-Tetradecanoyl-2-(9Z,12Z-octadecadienoyl)-3-(11Z-eicosenoyl)-sn-glycerol"	72.05	C55H100O6			Triacylglycerols [GL0301]	Triradylglycerols [GL03]	Glycerolipids [GL]		64311.2	61037.7	64162.4	69018.9	57467.1	74178.9	80200.1	95191	93314.6	96729.4	115380	161558	86045.8	65029.4	107062	0.6074	down	0.00365905	0.0156265	1.0506
NEG	NEG_885.542_5.3534	885.542	5.3534	"PI(18:0/20:4(5Z,8Z,11Z,14Z))"	90.15	C47H83O13P	PI	Sphingolipids	Diacylglycerophosphoinositols [GP0601]	Glycerophosphoinositols [GP06]	Glycerophospholipids [GP]	"PI(16:0/22:4(10Z,13Z,16Z,19Z));PI(16:0/22:4(7Z,10Z,13Z,16Z));PI(18:0/20:4(8Z,11Z,14Z,17Z));PG(a-21:0/20:5(7Z,9Z,11E,13E,17Z)-3OH(5,6,15));PG(20:5(7Z,9Z,11E,13E,17Z)-3OH(5,6,15)/a-21:0);PG(i-21:0/20:5(7Z,9Z,11E,13E,17Z)-3OH(5,6,15));PG(20:5(7Z,9Z,11E,13E,17Z)-3OH(5,6,15)/i-21:0);PE(P-18:0/LTE4);PE(LTE4/P-18:0);PG(20:1(11Z)/20:3(5Z,8Z,11Z)-O(14R,15S));PG(20:3(5Z,8Z,11Z)-O(14R,15S)/20:1(11Z));PG(20…	10081.5	9487.73	11669.2	11482.9	9198.11	11982.1	16894.8	20330.6	17418	17258.6	16859.2	16271.4	14077.9	10650.3	17505.4	0.6084	down	1.13416e-05	0.000174637	1.15621
POS	POS_809.648_6.9516	809.648	6.9516	SM 26:1;2O/16:3	84.87	C47H89N2O6P	SM	Sphingomyelin	Ceramide phosphocholines (sphingomyelins) [SP0301]	Phosphosphingolipids [SP03]	Sphingolipids [SP]	"Cholesteryl chloride;SM(d18:2(4E,14Z)/24:2(5Z,9Z));[(2S,3R)-3-Hydroxy-2-[[(5E,8E,11E,14E)-tetracosa-5,8,11,14-tetraenoyl]amino]octadecyl] 2-(trimethylazaniumyl)ethyl phosphate;DG(a-25:0/6 keto-PGF1alpha/0:0);DG(6 keto-PGF1alpha/a-25:0/0:0);DG(a-25:0/0:0/6 keto-PGF1alpha);DG(6 keto-PGF1alpha/0:0/a-25:0);DG(a-25:0/TXB2/0:0);DG(TXB2/a-25:0/0:0);DG(a-25:0/0:0/TXB2);DG(TXB2/0:0/a-25:0);SM(d18:0/22:1(…	124321	135753	145225	132883	257371	151660	227645	282124	248689	250659	279246	266981	208546	157869	259224	0.609	down	0.00359324	0.0154012	1.11144
POS	POS_824.612_6.3924	824.612	6.3924	PC 21:0_18:4	86.24	C47H86NO8P	PC	Phosphatidylcholine	Diacylglycerophosphocholines [GP0101]	Glycerophosphocholines [GP01]	Glycerophospholipids [GP]	"PE(18:3(6Z,9Z,12Z)/24:1(15Z));PE(18:3(9Z,12Z,15Z)/24:1(15Z));PE(18:4(6Z,9Z,12Z,15Z)/24:0);PE(20:0/22:4(7Z,10Z,13Z,16Z));PE(20:2(11Z,14Z)/22:2(13Z,16Z));PE(20:3(5Z,8Z,11Z)/22:1(13Z));PE(20:3(8Z,11Z,14Z)/22:1(13Z));PE(20:4(5Z,8Z,11Z,14Z)/22:0);PE(20:4(8Z,11Z,14Z,17Z)/22:0);PE(22:0/20:4(5Z,8Z,11Z,14Z));PE(22:0/20:4(8Z,11Z,14Z,17Z));PE(22:1(13Z)/20:3(5Z,8Z,11Z));PE(22:1(13Z)/20:3(8Z,11Z,14Z));PE(22:…	347794	415603	257127	347412	383762	374844	624626	647815	597371	624570	361709	632110	467895	354424	581367	0.6096	down	0.00198336	0.00969142	1.05559
POS	POS_482.322_2.0988	482.322	2.0988	LPC 15:0/0:0	100	C23H48NO7P	LPC	Lysophophatidylcholine				LysoPC(15:0/0:0);LysoPE(0:0/18:0);LysoPE(18:0/0:0);Palmitoyl Ara-C;12-Hydroxy-12-octadecanoylcarnitine;3-Hydroxyoctadecanoylcarnitine;10-Hydroxyoctadecanoylcarnitine;9-Hydroxyoctadecanoylcarnitine;13-Hydroxyoctadecanoylcarnitine;5-Hydroxyoctadecanoylcarnitine;7-Hydroxyoctadecanoylcarnitine;8-Hydroxyoctadecanoylcarnitine;11-Hydroxyoctadecanoylcarnitine;6-Hydroxyoctadecanoylcarnitine;(2S)-2-Hydroxy…	73656.3	65783.2	70907.2	79071.6	68582.3	82910.2	129202	132661	115940	113076	117511	114263	96963.6	73485.1	120442	0.6101	down	1.12641e-06	3.07738e-05	1.16262
POS	POS_960.729_7.0218	960.729	7.0218	Hex2Cer 18:1;O2/23:0	99.8	C53H101NO13	Hex2Cer	Dihexosylceramide				Lactosyl Ceramides Bovine (buttermilk)	5302.92	9688.54	5464.79	5438.06	16011.9	5897.79	13226.2	14502.4	11480.1	13032.9	13184.9	12704.5	10494.6	7967.33	13021.8	0.6118	down	0.0239998	0.0673934	1.08104
POS	POS_706.567_6.8936	706.567	6.8936	PE O-34:0	90.4	C39H80NO7P	EtherPE	Ether-linked phosphatidylethanolamine				DG(19:0/PGJ2/0:0);DG(PGJ2/19:0/0:0);DG(19:0/0:0/PGJ2);DG(PGJ2/0:0/19:0);DG(i-19:0/PGJ2/0:0);DG(PGJ2/i-19:0/0:0);DG(i-19:0/0:0/PGJ2);DG(PGJ2/0:0/i-19:0)	6744.92	17845.8	13148.2	9387.55	24236.7	12020.5	21503.5	23220.5	20910.2	19466.4	23928.3	27075.5	18290.7	13897.3	22684.1	0.6126	down	0.0265845	0.0728678	1.05263
POS	POS_721.537_4.4727	721.537	4.4727	SM 36:6;O2	81.5	C41H73N2O6P	SM	Sphingomyelin					878.833	3289.08	1066.15	1304.01	1347.56	1306.94	2576.07	2446.47	2851.32	2393.05	2491.16	2213.14	2013.65	1532.09	2495.2	0.614	down	0.0244785	0.0684115	1.08012
POS	POS_715.57_5.6622	715.57	5.6622	SM 32:2;2O/3:0	79	C40H79N2O6P	SM	Sphingomyelin	Ceramide phosphocholines (sphingomyelins) [SP0301]	Phosphosphingolipids [SP03]	Sphingolipids [SP]	"DG(16:1(9Z)/24:1(15Z)/0:0);DG(18:0/22:2(13Z,16Z)/0:0);DG(18:1(11Z)/22:1(13Z)/0:0);DG(18:1(9Z)/22:1(13Z)/0:0);DG(18:2(9Z,12Z)/22:0/0:0);DG(20:0/20:2(11Z,14Z)/0:0);DG(20:1(11Z)/20:1(11Z)/0:0);DG(20:2(11Z,14Z)/20:0/0:0);DG(22:0/18:2(9Z,12Z)/0:0);DG(22:1(13Z)/18:1(11Z)/0:0);DG(22:1(13Z)/18:1(9Z)/0:0);DG(22:2(13Z,16Z)/18:0/0:0);DG(24:1(15Z)/16:1(9Z)/0:0);DG(18:0/0:0/22:2n6);DG(20:0/0:0/20:2n6);DG(16:…	63433.2	36112.1	61116	69701.7	71251.5	68218.2	117691	118530	106938	105724	63942.3	89342.3	81000.1	61638.8	100361	0.6142	down	0.00620386	0.02365	1.0187
POS	POS_766.571_5.691	766.571	5.691	"PC(P-18:0/18:4(6Z,9Z,12Z,15Z))"	97.93	C44H80NO7P	PC	Phosphatidylcholine	"1Z-alkenyl,2-acylglycerophosphocholines [GP0103]"	Glycerophosphocholines [GP01]	Glycerophospholipids [GP]	"PC(18:3(6Z,9Z,12Z)/P-18:1(11Z));PC(18:3(6Z,9Z,12Z)/P-18:1(9Z));PC(18:3(9Z,12Z,15Z)/P-18:1(11Z));PC(18:3(9Z,12Z,15Z)/P-18:1(9Z));PC(18:4(6Z,9Z,12Z,15Z)/P-18:0);PC(20:4(5Z,8Z,11Z,14Z)/P-16:0);PC(20:4(8Z,11Z,14Z,17Z)/P-16:0);PC(P-16:0/20:4(5Z,8Z,11Z,14Z));PC(P-16:0/20:4(8Z,11Z,14Z,17Z));PC(P-18:0/18:4(6Z,9Z,12Z,15Z));PC(P-18:1(11Z)/18:3(6Z,9Z,12Z));PC(P-18:1(11Z)/18:3(9Z,12Z,15Z));PC(P-18:1(9Z)/18:…	193821	212925	200355	212008	332499	204597	384796	391077	357336	348828	329139	392412	296649	226034	367265	0.6155	down	0.0010402	0.00581612	1.11783
POS	POS_860.725_7.3599	860.725	7.3599	PC O-42:0	83.3	C50H102NO7P	EtherPC	Ether-linked phosphatidylcholine					91674.4	141042	88591.1	102971	78512.4	101992	166782	163331	150793	132269	225525	142675	132180	100797	163563	0.6163	down	0.00142521	0.0074424	1.06039
NEG	NEG_1528.13_6.3908	1528.13	6.3908	CL 34:1_43:2	78.9	C86H162O17P2	CL	Cardiolipin					5627.97	4650.13	5853.66	5751.28	4839.67	6591.75	8485.71	9101.02	9378	10206.8	8461.46	8391.64	7278.26	5552.41	9004.11	0.6167	down	4.15545e-05	0.000468836	1.13517
POS	POS_608.462_5.2568	608.462	5.2568	LysoPC(24:0/0:0)	84	C32H66NO7P	lysoPC		Monoacylglycerophosphocholines [GP0105]	Glycerophosphocholines [GP01]	Glycerophospholipids [GP]	"LysoPC(24:0/0:0);Cer(d17:1/20:4(6E,8Z,11Z,14Z)+=O(5));Cer(d17:1/20:4(5Z,8Z,11Z,13E)+=O(15));Cer(d17:1/20:5(5Z,8Z,11Z,14Z,16E)-OH(18R));Cer(d17:1/20:5(5Z,8Z,11Z,14Z,16E)-OH(18));Cer(d17:1/20:5(5Z,8Z,10E,14Z,17Z)-OH(12));Cer(d17:1/20:5(6E,8Z,11Z,14Z,17Z)-OH(5));Ubiquinone 6;Feruloyl-beta-sitosterol;Schottenol 3-ferulate"	35706.7	33615.5	35666.2	42717	42052.9	41849.4	75744.2	62430.5	65344.4	63277.5	35285.1	73413.7	50591.9	38601.3	62582.6	0.6168	down	0.00812803	0.0291353	1.00482
POS	POS_872.763_8.2381	872.763	8.2381	TG 16:0_18:2_18:2	100	C55H98O6	TG	Triacylglycerol				"TG(16:0/16:0/20:4(5Z,8Z,11Z,14Z));TG(16:0/18:2(9Z,12Z)/18:2(9Z,12Z));TG(16:1(9Z)/18:1(9Z)/18:2(9Z,12Z));TG(18:1(11Z)/16:0/18:3(9Z,12Z,15Z));TG(18:1(11Z)/16:1(9Z)/18:2(9Z,12Z));TG(18:1(9Z)/16:0/18:3(9Z,12Z,15Z));Glycerol 1,2-di-(9Z,12Z-octadecadienoate) 3-hexadecanoate;Glycerol 1,3-di-(9Z,12Z-octadecadienoate) 2-hexadecanoate;TG(14:0/16:0/22:4(7Z,10Z,13Z,16Z));TG(14:0/18:0/20:4(5Z,8Z,11Z,14Z));TG…	1.84683e+07	2.15797e+07	1.90839e+07	1.97286e+07	1.59305e+07	2.07347e+07	2.57198e+07	3.13017e+07	3.29757e+07	3.18253e+07	3.79358e+07	2.74404e+07	2.5227e+07	1.92543e+07	3.11998e+07	0.6171	down	6.89183e-05	0.000701549	1.11023
NEG	NEG_561.378_4.1536	561.378	4.1536	PE-Cer 26:2;O3	74.8	C28H55N2O7P	PE_Cer	Ceramide phosphoethanolamine				"Cholesterol glucuronide;5-alpha-Cholestane-3-beta,5,6-beta-triol, 6-acetate 3-(hydrogen succinate);DG(10:0/PGJ2/0:0);DG(PGJ2/10:0/0:0);DG(10:0/0:0/PGJ2);DG(PGJ2/0:0/10:0);22-Acetylpriverogenin B;Ganoderiol I"	3933.76	2947.29	3240.42	3694.16	3098.85	4331.34	5841.62	6347.91	5558.7	5611.33	6278.14	4787.25	4639.23	3540.97	5737.49	0.6172	down	0.000110145	0.00100377	1.11721
POS	POS_864.751_7.4883	864.751	7.4883	TG O-21:4_16:0_16:4	100	C56H94O5	EtherTG	Ether-linked triacylglycerol					34169.3	58997.1	41610.1	23788.3	46164.2	36022.2	70986	62158.7	66162.1	60396.7	85763.9	44557.5	52564.7	40125.2	65004.2	0.6173	down	0.0096509	0.0332605	1.01424
NEG	NEG_271.227_1.863	271.227	1.863	FA 16:0(2OH)	100	C16H32O3	OxFA	Oxidized fatty acid	Hydroxy fatty acids [FA0105]	Fatty Acids and Conjugates [FA01]	Fatty Acyls [FA]		7574.16	5766.34	7140.4	8022.69	7425.09	8731.35	15757.1	12119.2	10865.5	11161	11966.7	10101.1	9719.21	7443.34	11995.1	0.6205	down	0.000238378	0.00182421	1.08318
POS	POS_786.597_6.2943	786.597	6.2943	"PC(20:2(11Z,14Z)/16:0)"	87.35	C44H84NO8P	PC	Phosphatidylcholine	Diacylglycerophosphocholines [GP0101]	Glycerophosphocholines [GP01]	Glycerophospholipids [GP]	"PC(18:1(9Z)/18:1(9Z));PC(14:0/22:2(13Z,16Z));PC(14:1(9Z)/22:1(13Z));PC(16:0/20:2(11Z,14Z));PC(16:1(9Z)/20:1(11Z));PC(18:0/18:2(9Z,12Z));PC(18:1(11Z)/18:1(11Z));PC(18:1(11Z)/18:1(9Z));PC(18:1(9Z)/18:1(11Z));PC(18:2(9Z,12Z)/18:0);PC(20:1(11Z)/16:1(9Z));PC(20:2(11Z,14Z)/16:0);PC(22:1(13Z)/14:1(9Z));PC(22:2(13Z,16Z)/14:0);PE-NMe(14:1(9Z)/24:1(15Z));PE-NMe(16:0/22:2(13Z,16Z));PE-NMe(16:1(9Z)/22:1(13Z…	7.54342e+07	7.89428e+07	8.04444e+07	7.54879e+07	6.21385e+07	7.84539e+07	1.24775e+08	1.26373e+08	132083734	1.2829e+08	1.04778e+08	1.09269e+08	9.80392e+07	7.51503e+07	1.20928e+08	0.6214	down	5.69065e-06	0.000102511	1.12721
POS	POS_856.672_7.0904	856.672	7.0904	PC 22:0_19:2	74.95	C49H94NO8P	PC	Phosphatidylcholine	Diacylglycerophosphocholines [GP0101]	Glycerophosphocholines [GP01]	Glycerophospholipids [GP]	"PE(20:1(11Z)/24:1(15Z));PE(20:2(11Z,14Z)/24:0);PE(22:0/22:2(13Z,16Z));PE(22:1(13Z)/22:1(13Z));PE(22:2(13Z,16Z)/22:0);PE(24:0/20:2(11Z,14Z));PE(24:1(15Z)/20:1(11Z));PE-NMe2(18:1(11Z)/24:1(15Z));PE-NMe2(18:1(9Z)/24:1(15Z));PE-NMe2(18:2(9Z,12Z)/24:0);PE-NMe2(20:0/22:2(13Z,16Z));PE-NMe2(20:1(11Z)/22:1(13Z));PE-NMe2(20:2(11Z,14Z)/22:0);PE-NMe2(22:0/20:2(11Z,14Z));PE-NMe2(22:1(13Z)/20:1(11Z));PE-NMe2(…	22515.9	19275.7	23633.8	24127.8	22108.3	26210.3	44423.3	35533.6	39174.8	23019.7	38727.6	40655.1	29950.5	22978.6	36922.3	0.6224	down	0.00326592	0.0142912	1.02805
POS	POS_818.587_5.0023	818.587	5.0023	PC 18:3_21:4	98.2	C47H80NO8P	PC	Phosphatidylcholine				"PS(14:0/24:1(15Z));PS(14:1(9Z)/24:0);PS(16:0/22:1(13Z));PS(16:1(9Z)/22:0);PS(18:0/20:1(11Z));PS(18:1(11Z)/20:0);PS(18:1(9Z)/20:0);PS(20:0/18:1(11Z));PS(20:0/18:1(9Z));PS(20:1(11Z)/18:0);PS(22:0/16:1(9Z));PS(22:1(13Z)/16:0);PS(24:0/14:1(9Z));PS(24:1(15Z)/14:0);PC(18:1(11Z)/18:1(12Z)-2OH(9,10));PC(18:1(12Z)-2OH(9,10)/18:1(11Z));PC(18:1(9Z)/18:1(12Z)-2OH(9,10));PC(18:1(12Z)-2OH(9,10)/18:1(9Z));PC(P…	29451.3	49229.2	30436.8	22497.6	47491.6	26737.8	63173.1	52418.2	59843.7	56740	35851.2	62482.8	44696.1	34307.4	55084.8	0.6228	down	0.011244	0.0372935	1.00525
NEG	NEG_778.574_6.733	778.574	6.733	PE(P-20:0/20:4)	79.7	C45H81N1O7P1	PE	Phosphatidylethanolamine				"PE(22:4(7Z,10Z,13Z,16Z)/P-18:0);PE(P-18:0/22:4(7Z,10Z,13Z,16Z))"	99149	79852.9	98012.6	105481	80919	115808	178384	139305	168028	184297	119415	140207	125738	96537	154939	0.6231	down	0.000483073	0.00319506	1.0674
POS	POS_942.751_7.7237	942.751	7.7237	"TG(22:5(7Z,10Z,13Z,16Z,19Z)/14:1(9Z)/22:5(7Z,10Z,13Z,16Z,19Z))"	76.91	C61H96O6	TG	Triacylglycerol	Triacylglycerols [GL0301]	Triradylglycerols [GL03]	Glycerolipids [GL]	"TG(18:3(9Z,12Z,15Z)/18:2(9Z,12Z)/22:6(4Z,7Z,10Z,13Z,16Z,19Z));TG(18:3(9Z,12Z,15Z)/18:3(9Z,12Z,15Z)/22:5(7Z,10Z,13Z,16Z,19Z));TG(20:4(5Z,8Z,11Z,14Z)/18:2(9Z,12Z)/20:5(5Z,8Z,11Z,14Z,17Z));TG(20:4(5Z,8Z,11Z,14Z)/20:4(5Z,8Z,11Z,14Z)/18:3(9Z,12Z,15Z));TG(20:5(5Z,8Z,11Z,14Z,17Z)/18:1(9Z)/20:5(5Z,8Z,11Z,14Z,17Z));TG(14:0/22:5(4Z,7Z,10Z,13Z,16Z)/22:6(4Z,7Z,10Z,13Z,16Z,19Z));TG(14:0/22:5(7Z,10Z,13Z,16Z,1…	200807	272642	182939	210961	190464	213868	265856	298449	332769	322431	469347	347550	275673	211947	339400	0.6245	down	0.000950028	0.00542302	1.04889
NEG	NEG_802.561_5.9066	802.561	5.9066	PC 34:2	86.29	C42H80NO8P	PC	Phosphatidylcholine	Diacylglycerophosphocholines [GP0101]	Glycerophosphocholines [GP01]	Glycerophospholipids [GP]	"PS(15:0/22:1(13Z));PS(22:1(13Z)/15:0);PE(20:1(11Z)/18:1(12Z)-2OH(9,10));PE(18:1(12Z)-2OH(9,10)/20:1(11Z));PE(P-18:0/PGF1alpha);PE(PGF1alpha/P-18:0);PC(14:0/20:2(11Z,14Z));PC(14:1(9Z)/20:1(11Z));PC(16:0/18:2(9Z,12Z));PC(16:1(9Z)/18:1(11Z));PC(16:1(9Z)/18:1(9Z));PC(18:1(11Z)/16:1(9Z));PC(18:1(9Z)/16:1(9Z));PC(18:2(9Z,12Z)/16:0);PC(20:1(11Z)/14:1(9Z));PC(20:2(11Z,14Z)/14:0);PE(15:0/22:2(13Z,16Z));P…	4.64607e+06	4.0323e+06	4.72999e+06	4.29242e+06	3.92851e+06	5.14573e+06	6.643e+06	7.57324e+06	7.22046e+06	7.42819e+06	7.33443e+06	6.63186e+06	5.80052e+06	4.4625e+06	7.13853e+06	0.6251	down	1.13767e-05	0.000174948	1.13072
NEG	NEG_838.56_5.6363	838.56	5.6363	PE 22:5_22:5	85.5	C49H78NO8P	PE	Phosphatidylethanolamine				"PS(18:0/22:4(7Z,10Z,13Z,16Z));PS(18:2(9Z,12Z)/22:2(13Z,16Z));PS(18:3(6Z,9Z,12Z)/22:1(13Z));PS(18:3(9Z,12Z,15Z)/22:1(13Z));PS(18:4(6Z,9Z,12Z,15Z)/22:0);PS(20:0/20:4(5Z,8Z,11Z,14Z));PS(20:0/20:4(8Z,11Z,14Z,17Z));PS(20:1(11Z)/20:3(5Z,8Z,11Z));PS(20:1(11Z)/20:3(8Z,11Z,14Z));PS(20:2(11Z,14Z)/20:2(11Z,14Z));PS(20:3(5Z,8Z,11Z)/20:1(11Z));PS(20:3(8Z,11Z,14Z)/20:1(11Z));PS(20:4(5Z,8Z,11Z,14Z)/20:0);PS(20…	9506.84	7886.44	9110.99	11188.1	9027.34	11728.4	15518.7	16739.6	13803.5	16589.8	15158.1	15388.6	12637.2	9741.36	15533.1	0.6271	down	0.000173918	0.00143194	1.10878
NEG	NEG_828.576_5.9409	828.576	5.9409	PC 18:1_18:2	76.91	C44H82NO8P	PC	Phosphatidylcholine	Diacylglycerophosphocholines [GP0101]	Glycerophosphocholines [GP01]	Glycerophospholipids [GP]	"PE(20:0/20:3(8Z,11Z,14Z)-2OH(5,6));PE(20:3(8Z,11Z,14Z)-2OH(5,6)/20:0);PE(22:2(13Z,16Z)/18:1(12Z)-2OH(9,10));PE(18:1(12Z)-2OH(9,10)/22:2(13Z,16Z));PC(17:0/20:3(8Z,11Z,14Z)-2OH(5,6));PC(20:3(8Z,11Z,14Z)-2OH(5,6)/17:0);PC(20:3(5Z,8Z,11Z)/P-18:1(11Z));PC(20:3(5Z,8Z,11Z)/P-18:1(9Z));PC(20:3(8Z,11Z,14Z)/P-18:1(11Z));PC(20:3(8Z,11Z,14Z)/P-18:1(9Z));PC(20:4(5Z,8Z,11Z,14Z)/P-18:0);PC(20:4(8Z,11Z,14Z,17Z)…	1.39305e+06	1.22536e+06	1.47535e+06	1.37029e+06	1.23744e+06	1.64192e+06	2.0171e+06	2.30411e+06	2.20771e+06	2.33963e+06	2.31272e+06	2.07199e+06	1.79972e+06	1.39057e+06	2.20888e+06	0.6295	down	1.96961e-05	0.000266942	1.11795
NEG	NEG_742.537_5.8968	742.537	5.8968	"PE(18:0/18:2(9Z,12Z))"	71.89	C41H78NO8P	PE	Phosphatidylethanolamine	Diacylglycerophosphoethanolamines [GP0201]	Glycerophosphoethanolamines [GP02]	Glycerophospholipids [GP]	"PC(15:0/18:2(9Z,12Z));PC(18:2(9Z,12Z)/15:0);PE(14:0/22:2(13Z,16Z));PE(14:1(9Z)/22:1(13Z));PE(16:0/20:2(11Z,14Z));PE(16:1(9Z)/20:1(11Z));PE(18:0/18:2(9Z,12Z));PE(18:1(11Z)/18:1(11Z));PE(18:1(11Z)/18:1(9Z));PE(18:1(9Z)/18:1(11Z));PE(18:1(9Z)/18:1(9Z));PE(18:2(9Z,12Z)/18:0);PE(20:1(11Z)/16:1(9Z));PE(20:2(11Z,14Z)/16:0);PE(22:1(13Z)/14:1(9Z));PE(22:2(13Z,16Z)/14:0);PE-NMe(15:0/20:2(11Z,14Z));PE-NMe(…	51323.3	45513.4	56984.3	51797.2	45876.3	60739.8	73532.8	87986.6	83127.8	91548	85149.3	73521.3	67258.3	52039	82477.6	0.6309	down	2.16083e-05	0.000284673	1.1025
POS	POS_844.733_8.0379	844.733	8.0379	TG 16:1_16:1_18:2	100	C53H94O6	TG	Triacylglycerol				"TG(16:1(9Z)/16:1(9Z)/18:2(9Z,12Z));TG(16:1(9Z)/16:0/18:3(9Z,12Z,15Z));TG(18:2(9Z,12Z)/14:0/18:2(9Z,12Z));SM(d19:1/24:1(15Z));TG(14:0/14:0/22:4(7Z,10Z,13Z,16Z));TG(14:0/16:0/20:4(5Z,8Z,11Z,14Z));TG(14:0/16:0/20:4(8Z,11Z,14Z,17Z));TG(14:0/18:0/18:4(6Z,9Z,12Z,15Z));TG(14:0/16:1(9Z)/20:3(5Z,8Z,11Z));TG(14:0/16:1(9Z)/20:3n6);TG(14:0/18:1(11Z)/18:3(6Z,9Z,12Z));TG(14:0/18:1(11Z)/18:3(9Z,12Z,15Z));TG(14…	2.01773e+06	2.68197e+06	2.03572e+06	2.11504e+06	1.77081e+06	2.22392e+06	2.83401e+06	3.25575e+06	3.70214e+06	3.40723e+06	4.41356e+06	2.64157e+06	2.75829e+06	2.14086e+06	3.37571e+06	0.6342	down	0.000943857	0.00539611	1.03199
POS	POS_574.385_2.825	574.385	2.825	LPC 22:3-SN1	70.35	C30H56NO7P	LPC	Lysophophatidylcholine	Monoacylglycerophosphocholines [GP0105]	Glycerophosphocholines [GP01]	Glycerophospholipids [GP]	15-(3-Methyl-5-pentylfuran-2-yl)pentadecanoylcarnitine;LysoPC(20:0/0:0);Aliskiren;(2-Acetyloxy-3-octadecoxypropyl) 2-(trimethylazaniumyl)ethyl phosphate	8812	7513.25	8711.52	8897.75	13640	9367.84	17935.5	13698.2	13855.5	12925.8	14670.3	16027.2	12171.3	9490.4	14852.1	0.639	down	0.00125088	0.00672994	1.04477
NEG	NEG_717.518_4.7791	717.518	4.7791	CL 16:0_18:0_18:0_18:0	83.4	C79H154O17P2	CL	Cardiolipin				"DG(18:2n6/0:0/22:4n6);SM(d18:1/14:1(9Z));SM(d18:2(4E,14Z)/14:0)"	2365.23	1916.57	2382.06	2485.69	2106.24	2611.8	3801.84	3844.9	3521.95	4211.67	3206.01	3056.28	2959.19	2311.26	3607.11	0.6408	down	6.49274e-05	0.000668536	1.06693
POS	POS_899.703_7.9243	899.703	7.9243	MGDG O-24:2_20:2	73.39	C53H96O9	MGDG	Monogalactosyldiacylglycerol				"Icosa-8,11,14-trienoylcarnitine;Icosa-5,8,11-trienoylcarnitine;(11Z,14Z,17Z)-Icosa-11,14,17-trienoylcarnitine;TG(16:1(9Z)/18:2(9Z,12Z)/20:4(5Z,8Z,11Z,14Z));TG(18:2(9Z,12Z)/16:0/20:5(5Z,8Z,11Z,14Z,17Z));TG(18:2(9Z,12Z)/18:2(9Z,12Z)/18:3(6Z,9Z,12Z));TG(18:2(9Z,12Z)/18:2(9Z,12Z)/18:3(9Z,12Z,15Z));TG(18:3(9Z,12Z,15Z)/18:1(11Z)/18:3(9Z,12Z,15Z));TG(18:3(9Z,12Z,15Z)/18:1(9Z)/18:3(9Z,12Z,15Z));TG(20:4(…	40573.1	34549.8	40745.5	46680	45941.1	48257.3	62051.5	73169.4	76427.4	72243.7	58880	57644.3	54763.6	42791.1	66736.1	0.6412	down	9.88792e-05	0.000923501	1.06167
POS	POS_858.71_7.1742	858.71	7.1742	PC O-25:1_17:0	100	C50H100NO7P	EtherPC	Ether-linked phosphatidylcholine				Isofucosterol 3-O-[6-O-Octadecanoyl-b-D-glucopyranoside];Sitoindoside II;Sitosterol 3-O-(6'-O-oleyl-beta-D-glucoside)	36711.4	53973	37358.8	39582.9	33452.3	40204.6	60052.3	55142.5	62520.8	59133.2	87298.4	51911.7	51445.2	40213.8	62676.5	0.6416	down	0.00134396	0.00711846	1.01108
POS	POS_496.34_2.3774	496.34	2.3774	1-Palmitoylphosphatidylcholine	93.78	C24H50NO7P	PC|LPC		Monoacylglycerophosphocholines [GP0105]	Glycerophosphocholines [GP01]	Glycerophospholipids [GP]	"LysoPC(16:0/0:0);LysoPC(0:0/16:0);1-Nonadecanoyl-glycero-3-phosphoethanolamine;1-Palmitoylphosphatidylcholine;9-HydroxyNonadecanoylcarnitine;11-HydroxyNonadecanoylcarnitine;Docosa-4,7,10,13,16-pentaenoyl carnitine;Clupanodonyl carnitine;23-Acetoxysoladulcidine;(7Z,10Z,13Z,16Z,19Z)-Docosapentaenoylcarnitine;(7E,10E,13E,16E,19E)-Docosapentaenoylcarnitine"	3.2676e+07	2.78158e+07	3.11412e+07	3.30313e+07	2.54655e+07	3.22254e+07	5.16866e+07	4.66699e+07	4.98195e+07	4.81386e+07	4.94496e+07	3.84045e+07	3.8877e+07	3.03925e+07	4.73615e+07	0.6417	down	2.68392e-05	0.000335355	1.07481
NEG	NEG_804.569_5.8968	804.569	5.8968	PC(16:0/18:1(9Z))	80.57	C42H82NO8P	PC	Phosphatidylcholine	Diacylglycerophosphocholines [GP0101]	Glycerophosphocholines [GP01]	Glycerophospholipids [GP]	"PS(15:0/22:0);PS(22:0/15:0);PE(20:0/18:1(12Z)-2OH(9,10));PE(18:1(12Z)-2OH(9,10)/20:0);PC(17:0/18:1(12Z)-2OH(9,10));PC(18:1(12Z)-2OH(9,10)/17:0);PC(18:1(11Z)/P-18:1(11Z));PC(18:1(11Z)/P-18:1(9Z));PC(18:1(9Z)/P-18:1(11Z));PC(18:1(9Z)/P-18:1(9Z));PC(18:2(9Z,12Z)/P-18:0);PC(20:2(11Z,14Z)/P-16:0);PC(P-16:0/20:2(11Z,14Z));PC(P-18:0/18:2(9Z,12Z));PC(P-18:1(11Z)/18:1(11Z));PC(P-18:1(11Z)/18:1(9Z));PC(P-…	426027	371987	447559	419198	378432	489830	617776	684681	645383	691590	685006	611119	539049	422172	655926	0.6436	down	2.00085e-05	0.000269766	1.0923
POS	POS_896.624_5.5137	896.624	5.5137	PC 9:0_36:10	72.99	C53H86NO8P	PC	Phosphatidylcholine	Diacylglycerophosphocholines [GP0101]	Glycerophosphocholines [GP01]	Glycerophospholipids [GP]	PG(i-20:0/PGF1alpha);PG(PGF1alpha/i-20:0)	5763.63	4257.24	5378.87	6320.99	5935.42	6793.1	8489.87	8770.57	8991.97	8803.02	7852.52	10029.8	7282.25	5741.54	8822.95	0.6508	down	0.00050333	0.00329625	1.04815
POS	POS_767.576_5.6904	767.576	5.6904	SM 38:5;O2	95.9	C43H79N2O7P	SM	Sphingomyelin				"Quadazocine;SM(d18:0/20:4(6E,8Z,11Z,14Z)+=O(5));SM(d18:0/20:4(5Z,8Z,11Z,13E)+=O(15));SM(d18:0/20:5(5Z,8Z,11Z,14Z,16E)-OH(18R));SM(d18:0/20:5(5Z,8Z,11Z,14Z,16E)-OH(18));SM(d18:0/20:5(5Z,8Z,10E,14Z,17Z)-OH(12));SM(d18:0/20:5(6E,8Z,11Z,14Z,17Z)-OH(5));SM(d18:1/20:3(5Z,8Z,11Z)-O(14R,15S));SM(d18:1/20:3(5Z,8Z,14Z)-O(11S,12R));SM(d18:1/20:3(5Z,11Z,14Z)-O(8,9));SM(d18:1/20:3(8Z,11Z,14Z)-O(5,6));SM(d18:…	101542	111109	103159	109451	176849	107144	175407	195147	182211	171745	159819	184304	148157	118209	178106	0.6637	down	0.00310144	0.0137338	1.00666
NEG	NEG_835.526_5.4145	835.526	5.4145	PI(16:1(9Z)/18:0)	70.72	C43H81O13P	PI	Sphingolipids	Diacylglycerophosphoinositols [GP0601]	Glycerophosphoinositols [GP06]	Glycerophospholipids [GP]	"PI(16:0/18:1(11Z));PI(16:0/18:1(9Z));PI(16:1(9Z)/18:0);PI(18:0/16:1(9Z));PG(a-17:0/PGF1alpha);PG(PGF1alpha/a-17:0);PG(i-17:0/PGF1alpha);PG(PGF1alpha/i-17:0);PG(18:0/20:3(5Z,8Z,11Z));PG(18:0/20:3(8Z,11Z,14Z));PG(20:1(11Z)/18:2(9Z,12Z));PA(21:0/20:3(8Z,11Z,14Z)-2OH(5,6));PA(20:3(8Z,11Z,14Z)-2OH(5,6)/21:0);PA(a-21:0/20:3(8Z,11Z,14Z)-2OH(5,6));PA(20:3(8Z,11Z,14Z)-2OH(5,6)/a-21:0);PA(i-21:0/20:3(8Z,1…	7538.2	6351.06	7996.63	8337.13	6795.96	8633.93	12455.4	11831.4	11244.9	11954.1	10829.1	10282.6	9520.87	7608.82	11432.9	0.6655	down	8.51121e-05	0.000825244	1.03448
NEG	NEG_876.576_5.6773	876.576	5.6773	SHexCer 40:2;O3	89.6	C46H87NO12S	SHexCer	Sulfatide				"PE(22:1(13Z)/22:6(5Z,8E,10Z,13Z,15E,19Z)-2OH(7S, 17S));PE(22:6(5Z,8E,10Z,13Z,15E,19Z)-2OH(7S, 17S)/22:1(13Z));PE(22:1(13Z)/22:6(4Z,7Z,11E,13Z,15E,19Z)-2OH(10S,17));PE(22:6(4Z,7Z,11E,13Z,15E,19Z)-2OH(10S,17)/22:1(13Z));PE(DiMe(13,5)/20:3(5Z,8Z,11Z)-O(14R,15S));PE(20:3(5Z,8Z,11Z)-O(14R,15S)/DiMe(13,5));PE(DiMe(13,5)/20:3(5Z,8Z,14Z)-O(11S,12R));PE(20:3(5Z,8Z,14Z)-O(11S,12R)/DiMe(13,5));PE(DiMe(13,5…	55261.2	47663.6	54952	57602.4	46754.1	64091.8	82126.4	87879	80361.3	86004.3	80771.7	71074.1	67878.5	54387.5	81369.5	0.6684	down	8.06461e-05	0.00079442	1.02704
POS	POS_903.727_7.9953	903.727	7.9953	MGDG O-18:1_26:1	88.27	C53H100O9	MGDG	Monogalactosyldiacylglycerol				"TG(14:0/22:6(4Z,7Z,10Z,13Z,16Z,19Z)/O-18:0);TG(14:0/O-18:0/22:6(4Z,7Z,10Z,13Z,16Z,19Z));TG(14:1(9Z)/22:5(4Z,7Z,10Z,13Z,16Z)/O-18:0);TG(14:1(9Z)/22:5(7Z,10Z,13Z,16Z,19Z)/O-18:0);TG(14:1(9Z)/O-18:0/22:5(4Z,7Z,10Z,13Z,16Z));TG(14:1(9Z)/O-18:0/22:5(7Z,10Z,13Z,16Z,19Z));TG(16:1(9Z)/20:5(5Z,8Z,11Z,14Z,17Z)/O-18:0);TG(16:1(9Z)/O-18:0/20:5(5Z,8Z,11Z,14Z,17Z));TG(18:2(9Z,12Z)/18:4(6Z,9Z,12Z,15Z)/O-18:0);…	30108	33536.3	30323.2	32493.2	28263.5	32395.2	41951.6	46442.6	55364.2	45514.6	46093.1	40698.6	38598.7	31186.5	46010.8	0.6778	down	6.11721e-05	0.000636829	1.00513
POS	POS_841.701_6.9262	841.701	6.9262	SM 18:1;2O/26:1	94.74	C49H97N2O6P	SM	Sphingomyelin	Ceramide phosphocholines (sphingomyelins) [SP0301]	Phosphosphingolipids [SP03]	Sphingolipids [SP]		43362.2	45071.1	44097.6	46381.9	48049.6	47641.8	33647.5	29158.6	32207.9	28447.3	32354.5	32813.7	38602.8	45767.4	31438.3	1.4558	up	2.29296e-06	5.21945e-05	1.01609
POS	POS_794.599_6.4015	794.599	6.4015	"PC(P-18:0/20:4(8Z,11Z,14Z,17Z))"	82.31	C46H84NO7P	PC	Phosphatidylcholine	Diacylglycerophosphocholines [GP0101]	Glycerophosphocholines [GP01]	Glycerophospholipids [GP]	"PC(20:3(5Z,8Z,11Z)/P-18:1(11Z));PC(20:3(5Z,8Z,11Z)/P-18:1(9Z));PC(20:3(8Z,11Z,14Z)/P-18:1(11Z));PC(20:3(8Z,11Z,14Z)/P-18:1(9Z));PC(20:4(5Z,8Z,11Z,14Z)/P-18:0);PC(20:4(8Z,11Z,14Z,17Z)/P-18:0);PC(22:4(7Z,10Z,13Z,16Z)/P-16:0);PC(P-16:0/22:4(7Z,10Z,13Z,16Z));PC(P-18:0/20:4(5Z,8Z,11Z,14Z));PC(P-18:0/20:4(8Z,11Z,14Z,17Z));PC(P-18:1(11Z)/20:3(5Z,8Z,11Z));PC(P-18:1(11Z)/20:3(8Z,11Z,14Z));PC(P-18:1(9Z)/2…	1.09897e+06	1.19408e+06	1.23708e+06	1.21701e+06	1.19731e+06	1.15794e+06	773194	793710	805259	819966	694505	904443	991123	1.18373e+06	798513	1.4824	up	1.47179e-05	0.000213896	1.03627
POS	POS_840.696_6.9407	840.696	6.9407	PC 41:3e	86.28	C49H94NO7P	PC	Phosphatidylcholine	Diacylglycerophosphocholines [GP0101]	Glycerophosphocholines [GP01]	Glycerophospholipids [GP]		109303	93837	115268	100271	108477	104428	76475.9	73523.6	67843.4	66803.1	75487.3	64788.9	88042.2	105264	70820.4	1.4864	up	2.24397e-06	5.13499e-05	1.03416
NEG	NEG_794.567_6.5728	794.567	6.5728	"PC(15:0/22:4(7Z,10Z,13Z,16Z))"	70.42	C45H82NO8P	PC	Phosphatidylcholine	Diacylglycerophosphocholines [GP0101]	Glycerophosphocholines [GP01]	Glycerophospholipids [GP]	"PC(15:0/22:4(7Z,10Z,13Z,16Z));PC(22:4(7Z,10Z,13Z,16Z)/15:0);PE(18:0/22:4(7Z,10Z,13Z,16Z));PE(18:2(9Z,12Z)/22:2(13Z,16Z));PE(18:3(6Z,9Z,12Z)/22:1(13Z));PE(18:3(9Z,12Z,15Z)/22:1(13Z));PE(18:4(6Z,9Z,12Z,15Z)/22:0);PE(20:0/20:4(5Z,8Z,11Z,14Z));PE(20:0/20:4(8Z,11Z,14Z,17Z));PE(20:1(11Z)/20:3(5Z,8Z,11Z));PE(20:1(11Z)/20:3(8Z,11Z,14Z));PE(20:2(11Z,14Z)/20:2(11Z,14Z));PE(20:3(5Z,8Z,11Z)/20:1(11Z));PE(20…	28159	21597.8	26946.7	27613	22108.3	31310.2	17884.7	18185.3	18299.9	17619.6	16748.8	16318.5	21899.3	26289.2	17509.5	1.5014	up	0.000698381	0.00424796	1.00691
NEG	NEG_985.793_7.702	985.793	7.702	ASG 28:1;O;Hex;FA 25:0	100	C59H106O7	AHexCAS	Acylhexosyl campesterol				"TG(15:0/22:0/22:5(4Z,7Z,10Z,13Z,16Z));TG(15:0/22:0/22:5(7Z,10Z,13Z,16Z,19Z));TG(15:0/24:0/20:5(5Z,8Z,11Z,14Z,17Z));TG(15:0/22:1(13Z)/22:4(7Z,10Z,13Z,16Z));TG(15:0/24:1(15Z)/20:4(5Z,8Z,11Z,14Z));TG(15:0/24:1(15Z)/20:4(8Z,11Z,14Z,17Z));TG(15:0/20:4(5Z,8Z,11Z,14Z)/24:1(15Z));TG(15:0/22:4(7Z,10Z,13Z,16Z)/22:1(13Z));TG(15:0/22:5(4Z,7Z,10Z,13Z,16Z)/22:0);TG(15:0/20:4(8Z,11Z,14Z,17Z)/24:1(15Z));TG(15:0…	4645.01	4127.65	4328.72	4855.22	4095.52	5634.83	3626.65	3087.63	3088.01	3271.57	2627.52	2709.5	3841.49	4614.49	3068.48	1.5038	up	0.000156369	0.00131629	1.0097
NEG	NEG_803.627_6.641	803.627	6.641	SM 32:1;2O/6:0	84.8	C43H87N2O6P	SM	Sphingomyelin	Ceramide phosphocholines (sphingomyelins) [SP0301]	Phosphosphingolipids [SP03]	Sphingolipids [SP]	Oryzarol;Stanolone enanthate;SM(d18:1/20:0);SM(d16:1/22:0)	227359	194812	227703	224495	211405	258111	152183	155012	148632	156451	145812	130454	186036	223981	148091	1.5125	up	9.73009e-06	0.000156012	1.04933
POS	POS_638.567_6.9128	638.567	6.9128	"1,2-Dioleoyl-rac-glycerol"	77.18	C39H72O5	DG	Diacylglycerol	Diacylglycerols [GL0201]	Diradylglycerols [GL02]	Glycerolipids [GL]	"DG(14:0/22:2(13Z,16Z)/0:0);DG(14:1(9Z)/22:1(13Z)/0:0);DG(16:0/20:2(11Z,14Z)/0:0);DG(16:1(9Z)/20:1(11Z)/0:0);DG(18:0/18:2(9Z,12Z)/0:0);DG(18:1(11Z)/18:1(11Z)/0:0);DG(18:1(11Z)/18:1(9Z)/0:0);DG(18:1(9Z)/18:1(11Z)/0:0);DG(18:1(9Z)/18:1(9Z)/0:0);DG(18:2(9Z,12Z)/18:0/0:0);DG(20:1(11Z)/16:1(9Z)/0:0);DG(20:2(11Z,14Z)/16:0/0:0);DG(22:1(13Z)/14:1(9Z)/0:0);DG(22:2(13Z,16Z)/14:0/0:0);DG(14:0/0:0/22:2n6);DG…	463152	647762	477232	514621	466683	496122	317476	284953	350675	319916	455133	289093	423568	510929	336207	1.5197	up	0.000836785	0.00490411	1.00975
POS	POS_607.562_7.4857	607.562	7.4857	DG(18:0/18:0/0:0)	85.23	C39H76O5	DG	Diacylglycerol	Diacylglycerols [GL0201]	Diradylglycerols [GL02]	Glycerolipids [GL]		941063	1.157e+06	1.02612e+06	1.01571e+06	1.02205e+06	1.01036e+06	715038	593091	583140	615430	952143	521627	846064	1.02872e+06	663411	1.5506	up	0.00243981	0.0114161	1.05258
NEG	NEG_464.313_3.4516	464.313	3.4516	LPE O-18:1	100	C23H48NO6P	EtherLPE	Ether-linked lysophosphatidylethanolamine				LysoPE(P-18:0/0:0);3-Hydroxyheptadecanoylcarnitine;10-Hydroxyheptadecanoylcarnitine;11-Hydroxyheptadecanoylcarnitine;12-Hydroxyheptadecanoylcarnitine;N-Oleoyl Histidine	82321	74576.9	75415.2	88509.9	75419.1	93917.4	56890.8	57686.9	50997	56402.4	51472.3	42533.4	67178.5	81693.2	52663.8	1.5512	up	3.48311e-05	0.000408073	1.07014
POS	POS_839.693_6.9359	839.693	6.9359	SM 18:1;2O/26:2	80.87	C49H95N2O6P	SM	Sphingomyelin	Ceramide phosphocholines (sphingomyelins) [SP0301]	Phosphosphingolipids [SP03]	Sphingolipids [SP]	SM(d18:0/24:0)	201920	195041	213003	209855	200320	217137	140178	132340	126409	128470	122973	142363	169168	206213	132122	1.5608	up	9.54477e-08	5.1837e-06	1.1136
POS	POS_348.31_3.2255	348.31	3.2255	3-Palmitoyl-sn-glycerol	72.1	C19H38O4			Monoacylglycerols [GL0101]	Monoradylglycerols [GL01]	Glycerolipids [GL]	MG(0:0/16:0/0:0);MG(16:0/0:0/0:0);MG(i-16:0/0:0/0:0);MG(0:0/i-16:0/0:0);3-Palmitoyl-sn-glycerol	366418	425638	373787	324148	293314	278499	276448	238091	235591	231522	189315	149083	281821	343634	220008	1.5619	up	0.00253398	0.0117613	1.01074
POS	POS_952.821_8.4687	952.821	8.4687	"TG(18:1(11Z)/18:1(9Z)/22:4(7Z,10Z,13Z,16Z))"	71.39	C61H106O6	TG	Triacylglycerol	Triacylglycerols [GL0301]	Triradylglycerols [GL03]	Glycerolipids [GL]		1.01261e+06	1.01433e+06	923881	1.09772e+06	962374	928575	481884	634533	720438	690808	717128	557573	811822	989916	633727	1.5621	up	0.00046602	0.00311164	1.0762
NEG	NEG_526.292_2.2701	526.292	2.2701	LPE 22:5	98.5	C27H46NO7P	LPE	Lysophosphatidylethanolamine				"LysoPE(0:0/22:5(4Z,7Z,10Z,13Z,16Z));LysoPE(0:0/22:5(7Z,10Z,13Z,16Z,19Z));LysoPE(22:5(4Z,7Z,10Z,13Z,16Z)/0:0);LysoPE(22:5(7Z,10Z,13Z,16Z,19Z)/0:0)"	5098.62	3844.03	4588.31	5296.89	4311.62	5421.54	3491.28	3583.58	2984.56	3010.6	2952.34	2224.67	3900.67	4760.17	3041.17	1.5652	up	0.000531422	0.00344541	1.0456
POS	POS_584.519_6.5624	584.519	6.5624	DG 14:0_18:1	100	C35H66O5	DG	Diacylglycerol					44734.9	32128.3	42675.7	41164.6	43832.7	38212.3	21333.3	24781.1	27848.5	20840.6	32098.6	27629.9	33106.7	40458.1	25755.3	1.5709	up	0.000413095	0.00283341	1.05835
POS	POS_746.564_6.0281	746.564	6.0281	PC(18:1(9Z)/15:0)	93.43	C41H80NO8P	PC	Phosphatidylcholine	Diacylglycerophosphocholines [GP0101]	Glycerophosphocholines [GP01]	Glycerophospholipids [GP]	"PC(15:0/18:1(11Z));PC(15:0/18:1(9Z));PC(18:1(11Z)/15:0);PC(18:1(9Z)/15:0);PE(14:0/22:1(13Z));PE(14:1(9Z)/22:0);PE(16:0/20:1(11Z));PE(16:1(9Z)/20:0);PE(18:0/18:1(11Z));PE(18:0/18:1(9Z));PE(18:1(11Z)/18:0);PE(18:1(9Z)/18:0);PE(20:0/16:1(9Z));PE(20:1(11Z)/16:0);PE(22:0/14:1(9Z));PE(22:1(13Z)/14:0);PE-NMe2(16:0/18:1(9Z));PE-NMe(15:0/20:1(11Z));PE-NMe(20:1(11Z)/15:0);PE-NMe2(14:0/20:1(11Z));PE-NMe2(1…	212516	210600	241568	235433	291502	235430	144389	139666	162545	148876	175654	136889	194589	237841	151337	1.5716	up	3.35269e-05	0.000396918	1.08302
POS	POS_1181.05_6.8745	1181.05	6.8745	PC 40:0_24:1	71.96	C72H142NO8P	PC	Phosphatidylcholine	Diacylglycerophosphocholines [GP0101]	Glycerophosphocholines [GP01]	Glycerophospholipids [GP]		10117.5	9555.4	9322.35	10523.1	10736.5	7103.99	7778.43	6134.69	6575.27	5577.94	5119.42	5311.91	7821.37	9559.8	6082.94	1.5716	up	0.000454664	0.00305628	1.04665
POS	POS_960.787_8.1452	960.787	8.1452	TG 18:2_21:3_20:4	100	C62H102O6	TG	Triacylglycerol					27281.7	35892.7	28711	30086.7	24015.9	27406.2	13784.4	19016.3	18698.1	17476.5	19713	21120.6	23600.3	28899	18301.5	1.5791	up	0.000228455	0.00176494	1.06509
NEG	NEG_309.279_4.7964	309.279	4.7964	FA 20:1	100	C20H38O2	FA	Fatty acyls	Unsaturated fatty acids [FA0103]	Fatty Acids and Conjugates [FA01]	Fatty Acyls [FA]	"Ethyl oleate;6,8-Icosanedione;5,7-Icosanedione;4,6-Icosanedione;Oleyl acetate;9Z-Eicosenoic acid;Icos-2-enoic acid;Ethyl octadec-9-enoate;1-Ethyl-3-(3-dimethylaminopropyl)carbodiimide;1-Ethyl-3-(dimethyl-aminopropyl)-carbodiimide;9,12-Octadecadiene, (E,E)-"	25766.4	19543.1	28840.7	28469.1	21166.8	27019.4	15745.5	16458.9	17588.7	18316.9	14403.6	12620.7	20495	25134.2	15855.7	1.5852	up	0.000399642	0.00275645	1.05575
POS	POS_642.6_7.4958	642.6	7.4958	DG 18:0_18:0	100	C39H76O5	DG	Diacylglycerol	Diacylglycerols [GL0201]	Diradylglycerols [GL02]	Glycerolipids [GL]	"DG(14:0/22:0/0:0);DG(16:0/20:0/0:0);DG(18:0/18:0/0:0);DG(20:0/16:0/0:0);DG(22:0/14:0/0:0);Glycerol 1,2-dioctadecanoate;DG(14:0/0:0/22:0);DG(16:0/0:0/20:0);DG(18:0/0:0/18:0);DG(i-12:0/i-24:0/0:0);DG(i-12:0/0:0/i-24:0);DG(12:0/i-24:0/0:0);DG(12:0/0:0/i-24:0);DG(i-14:0/22:0/0:0);DG(i-14:0/0:0/22:0);DG(i-14:0/i-22:0/0:0);DG(i-14:0/0:0/i-22:0);DG(14:0/i-22:0/0:0);DG(14:0/0:0/i-22:0);DG(15:0/21:0/0:0)…	2.25012e+06	2.96622e+06	2.56895e+06	2.52174e+06	2.55922e+06	2.41063e+06	1.73355e+06	1.42859e+06	1.45625e+06	1.4855e+06	2.25761e+06	1.23456e+06	2.07274e+06	2.54615e+06	1.59934e+06	1.592	up	0.00137971	0.00726782	1.08347
POS	POS_932.853_8.9333	932.853	8.9333	TG 18:0_18:1_20:1	100	C59H110O6	TG	Triacylglycerol					515737	548204	523366	507615	643899	585198	255412	294250	334836	350349	442075	403934	450406	554003	346809	1.5974	up	0.00109027	0.00604651	1.08545
POS	POS_757.616_6.3035	757.616	6.3035	SM 18:1;2O/20:1	82.94	C43H85N2O6P	SM	Sphingomyelin	Ceramide phosphocholines (sphingomyelins) [SP0301]	Phosphosphingolipids [SP03]	Sphingolipids [SP]	"SM(d18:1/20:1(11Z));SM(d18:2(4E,14Z)/20:0);DG(24:0/0:0/18:2n6)"	288252	269227	310686	277024	276494	289188	180746	166431	188852	176884	149208	204627	231468	285145	177791	1.6038	up	2.33671e-05	0.000302158	1.13444
POS	POS_334.294_1.0329	334.294	1.0329	MG(15:0/0:0/0:0)	73.61	C18H36O4	MG	Monoacylglycerol	Monoacylglycerophosphocholines [GP0105]	Glycerophosphocholines [GP01]	Glycerophospholipids [GP]	"MG(0:0/15:0/0:0);MG(15:0/0:0/0:0);(+)-15,16-Dihydroxyoctadecanoic acid;(9S,10S)-9,10-dihydroxyoctadecanoate;MG(0:0/i-15:0/0:0);MG(0:0/a-15:0/0:0)[rac];MG(a-15:0/0:0/0:0)[rac];MG(i-15:0/0:0/0:0);9,10-Dihydroxystearic acid;Dihydroxystearic acid"	35522.3	45323	61099.9	39510.1	33163.7	44890	28880.9	21816.3	25917	30957.1	28136.9	25811.3	35085.7	43251.5	26919.9	1.6067	up	0.00208864	0.0101106	1.03375
POS	POS_614.568_7.2043	614.568	7.2043	DG 16:0_18:0	100	C37H72O5	DG	Diacylglycerol				DG(14:0/20:0/0:0);DG(16:0/18:0/0:0);DG(18:0/16:0/0:0);DG(20:0/14:0/0:0);DG(14:0/0:0/20:0);DG(16:0/0:0/18:0);DG(10:0/i-24:0/0:0);DG(10:0/0:0/i-24:0);DG(12:0/22:0/0:0);DG(12:0/0:0/22:0);DG(i-12:0/22:0/0:0);DG(i-12:0/0:0/22:0);DG(i-12:0/i-22:0/0:0);DG(i-12:0/0:0/i-22:0);DG(12:0/i-22:0/0:0);DG(12:0/0:0/i-22:0);DG(13:0/21:0/0:0);DG(13:0/0:0/21:0);DG(i-13:0/21:0/0:0);DG(i-13:0/0:0/21:0);DG(a-13:0/i-21:…	4.18281e+06	5.63128e+06	4.99775e+06	4.68313e+06	4.29886e+06	4.66204e+06	3.02348e+06	2.66818e+06	2.66258e+06	2.84932e+06	4.14048e+06	2.33751e+06	3.84478e+06	4.74264e+06	2.94692e+06	1.6094	up	0.000731098	0.00441014	1.09629
POS	POS_694.634_8.7933	694.634	8.7933	CE 20:2	81.92	C47H80O2	CE	Cholesteryl ester	Cholesteryl esters [ST0102]	Sterols [ST01]	Sterols [ST]	"DG(16:1(9Z)/24:1(15Z)/0:0);DG(18:0/22:2(13Z,16Z)/0:0);DG(18:1(11Z)/22:1(13Z)/0:0);DG(18:1(9Z)/22:1(13Z)/0:0);DG(18:2(9Z,12Z)/22:0/0:0);DG(20:0/20:2(11Z,14Z)/0:0);DG(20:1(11Z)/20:1(11Z)/0:0);DG(20:2(11Z,14Z)/20:0/0:0);DG(22:0/18:2(9Z,12Z)/0:0);DG(22:1(13Z)/18:1(11Z)/0:0);DG(22:1(13Z)/18:1(9Z)/0:0);DG(22:2(13Z,16Z)/18:0/0:0);DG(24:1(15Z)/16:1(9Z)/0:0);DG(18:0/0:0/22:2n6);DG(20:0/0:0/20:2n6);DG(16:…	122201	191810	191114	177383	228094	180149	81327	116164	129992	113831	103066	131017	147179	181792	112566	1.615	up	0.00171796	0.00864044	1.04138
POS	POS_671.565_8.7542	671.565	8.7542	DG 38:2	72.27	C41H76O5	DG	Diacylglycerol				"DG(18:0/22:5(4Z,7Z,10Z,13Z,16Z)/0:0);DG(18:0/22:5(7Z,10Z,13Z,16Z,19Z)/0:0);DG(18:1(11Z)/22:4(7Z,10Z,13Z,16Z)/0:0);DG(18:1(9Z)/22:4(7Z,10Z,13Z,16Z)/0:0);DG(18:3(6Z,9Z,12Z)/22:2(13Z,16Z)/0:0);DG(18:3(9Z,12Z,15Z)/22:2(13Z,16Z)/0:0);DG(18:4(6Z,9Z,12Z,15Z)/22:1(13Z)/0:0);DG(20:0/20:5(5Z,8Z,11Z,14Z,17Z)/0:0);DG(20:1(11Z)/20:4(5Z,8Z,11Z,14Z)/0:0);DG(20:1(11Z)/20:4(8Z,11Z,14Z,17Z)/0:0);DG(20:2(11Z,14Z)/…	52138.5	38642.6	57171.5	59009.3	44765.8	58026.3	38461.6	28570.6	30468.5	35624.2	24741.3	33833.8	41787.8	51625.7	31950	1.6158	up	0.00053879	0.00348099	1.07276
POS	POS_754.685_8.0833	754.685	8.0833	TG 12:0_15:0_16:0	100	C46H88O6	TG	Triacylglycerol				TG(14:0/14:0/15:0);TG(14:0/15:0/14:0);TG(20:0/13:0/10:0);TG(i-20:0/13:0/10:0);TG(20:0/i-15:0/8:0);TG(i-20:0/i-13:0/10:0);TG(20:0/i-13:0/10:0);TG(20:0/8:0/15:0);TG(i-20:0/8:0/15:0);TG(20:0/8:0/a-15:0);TG(i-20:0/8:0/i-15:0);TG(20:0/15:0/8:0);TG(i-20:0/i-15:0/8:0);TG(20:0/a-13:0/10:0);TG(20:0/8:0/i-15:0);TG(i-20:0/a-15:0/8:0);TG(i-20:0/8:0/a-15:0);TG(i-20:0/a-13:0/10:0);TG(20:0/10:0/i-13:0);TG(20:0/…	29542.4	38957.8	36097.7	29378.1	49162.3	29026	16733.1	14895.2	15443.1	16699.7	47041.5	20346.3	28610.3	35360.7	21859.8	1.6176	up	0.0249865	0.0695241	1.03413
POS	POS_729.587_5.8871	729.587	5.8871	SM(d18:1/18:1(9Z))	76.89	C41H81N2O6P	SM	Sphingomyelin	Ceramide phosphocholines (sphingomyelins) [SP0301]	Phosphosphingolipids [SP03]	Sphingolipids [SP]	"Ubiquinol 8;SM(d18:1/18:1(11Z));SM(d18:1/18:1(9Z));SM(d18:2(4E,14Z)/18:0)"	767828	906301	814831	760431	907617	790649	570811	550697	523003	541816	240956	627941	666907	824610	509204	1.6194	up	0.0138635	0.0440436	1.05567
POS	POS_720.585_6.4535	720.585	6.4535	PC(16:0/O-16:0)	75.82	C40H83N1O7P1	PC	Phosphatidylcholine	Diacylglycerophosphocholines [GP0101]	Glycerophosphocholines [GP01]	Glycerophospholipids [GP]		1.11485e+06	1.33369e+06	1.20638e+06	1.17675e+06	1.12471e+06	1.19152e+06	800874	755995	811913	763630	554158	723815	963191	1.19132e+06	735064	1.6207	up	0.000112848	0.00102118	1.13365
POS	POS_854.686_7.1424	854.686	7.1424	PC O-42:3	75.75	C50H96NO7P	PC	Phosphatidylcholine				"Isofucosterol 3-O-[6-O-(9,12-Octadecadienoyl)-b-D-glucopyranoside]"	100482	112673	98208.1	100331	80966.8	110479	54502.3	51899.6	52484.5	56479.9	87126.5	68852	81207.1	100523	61890.8	1.6242	up	0.000857551	0.00499913	1.10107
POS	POS_906.713_7.3887	906.713	7.3887	PC 46:5e	76.02	C54H100NO7P	PC	Phosphatidylcholine	Diacylglycerophosphocholines [GP0101]	Glycerophosphocholines [GP01]	Glycerophospholipids [GP]		48763.5	35064.5	38193.9	47665.4	65136	48071.2	24322.2	26520.9	27523.3	26102.6	28315.6	41332.7	38084.3	47149.1	29019.6	1.6247	up	0.0022262	0.0106257	1.0406
NEG	NEG_901.697_6.9374	901.697	6.9374	ASG 29:1;O;Hex;FA 18:0	100	C53H94O7	AHexSIS	Acylhexosyl sitosterol				"TG(15:0/16:0/22:5(4Z,7Z,10Z,13Z,16Z));TG(15:0/16:0/22:5(7Z,10Z,13Z,16Z,19Z));TG(15:0/18:0/20:5(5Z,8Z,11Z,14Z,17Z));TG(15:0/16:1(9Z)/22:4(7Z,10Z,13Z,16Z));TG(15:0/18:1(11Z)/20:4(5Z,8Z,11Z,14Z));TG(15:0/18:1(11Z)/20:4(8Z,11Z,14Z,17Z));TG(15:0/18:1(9Z)/20:4(5Z,8Z,11Z,14Z));TG(15:0/18:1(9Z)/20:4(8Z,11Z,14Z,17Z));TG(15:0/20:1(11Z)/18:4(6Z,9Z,12Z,15Z));TG(15:0/20:3(5Z,8Z,11Z)/18:2(9Z,12Z));TG(15:0/18:…	16958.2	14293.2	15819.8	23487.3	16958.5	20449.6	12396	13515.9	7604.93	11690.1	9927.21	11104.2	14517.1	17994.5	11039.7	1.63	up	0.00132571	0.00704484	1.06514
POS	POS_816.58_6.0819	816.58	6.0819	PC(P-16:0/PGD1)	77.85	C44H82NO10P	PC	Phosphatidylcholine	Diacylglycerophosphocholines [GP0101]	Glycerophosphocholines [GP01]	Glycerophospholipids [GP]	"PS(14:1(9Z)/24:1(15Z));PS(16:0/22:2(13Z,16Z));PS(16:1(9Z)/22:1(13Z));PS(18:0/20:2(11Z,14Z));PS(18:1(11Z)/20:1(11Z));PS(18:1(9Z)/20:1(11Z));PS(18:2(9Z,12Z)/20:0);PS(20:0/18:2(9Z,12Z));PS(20:1(11Z)/18:1(11Z));PS(20:1(11Z)/18:1(9Z));PS(20:2(11Z,14Z)/18:0);PS(22:1(13Z)/16:1(9Z));PS(22:2(13Z,16Z)/16:0);PS(24:1(15Z)/14:1(9Z));PC(16:0/20:3(8Z,11Z,14Z)-2OH(5,6));PC(20:3(8Z,11Z,14Z)-2OH(5,6)/16:0);PC(18:…	56740.6	35845.3	63625.8	54123.7	48627.5	61156.9	23458.1	29631.3	31186.4	33945.2	37693.6	40116.2	43012.6	53353.3	32671.8	1.633	up	0.00181935	0.00905381	1.05316
POS	POS_834.745_8.3048	834.745	8.3048	TG 15:0_15:1_19:1	100	C52H96O6	TG	Triacylglycerol				SM(d18:0/24:0)	359024	386493	363637	342564	453875	352501	173874	217005	264413	232817	233181	259464	303237	376349	230126	1.6354	up	0.000107606	0.000988742	1.12835
POS	POS_778.536_5.1625	778.536	5.1625	"PC(20:5(5Z,8Z,11Z,14Z,17Z)/16:1(9Z))"	83.82	C44H76NO8P	PC	Phosphatidylcholine	Diacylglycerophosphocholines [GP0101]	Glycerophosphocholines [GP01]	Glycerophospholipids [GP]	"PC(14:0/22:6(4Z,7Z,10Z,13Z,16Z,19Z));PC(14:1(9Z)/22:5(4Z,7Z,10Z,13Z,16Z));PC(14:1(9Z)/22:5(7Z,10Z,13Z,16Z,19Z));PC(16:1(9Z)/20:5(5Z,8Z,11Z,14Z,17Z));PC(18:2(9Z,12Z)/18:4(6Z,9Z,12Z,15Z));PC(18:3(6Z,9Z,12Z)/18:3(6Z,9Z,12Z));PC(18:3(6Z,9Z,12Z)/18:3(9Z,12Z,15Z));PC(18:3(9Z,12Z,15Z)/18:3(6Z,9Z,12Z));PC(18:3(9Z,12Z,15Z)/18:3(9Z,12Z,15Z));PC(18:4(6Z,9Z,12Z,15Z)/18:2(9Z,12Z));PC(20:5(5Z,8Z,11Z,14Z,17Z)/…	116599	125249	109552	116677	97200.7	121463	117059	58721.5	49214.2	58961.5	44574.1	91050.1	92193.5	114457	69930.1	1.6367	up	0.0142904	0.0450903	1.07773
POS	POS_938.807_8.4178	938.807	8.4178	TG 17:1_19:2_21:3	100	C60H104O6	TG	Triacylglycerol					112004	103055	133103	101585	116046	111918	45647.4	64707.2	69990.3	72679.3	69488	91442.8	90972.1	112952	68992.5	1.6372	up	0.00156921	0.00805003	1.10818
POS	POS_534.45_2.638	534.45	2.638	CAR 26:3	100	C33H59NO4	CAR	Acylcarnitine				Lignoceroylcarnitine;17-Methyltricosanoylcarnitine;13-Methyltricosanoylcarnitine;5-Methyltricosanoylcarnitine;20-Methyltricosanoylcarnitine;15-Methyltricosanoylcarnitine;22-Methyltricosanoylcarnitine;11-Methyltricosanoylcarnitine;9-Methyltricosanoylcarnitine;3-Methyltricosanoylcarnitine;12-Methyltricosanoylcarnitine;8-Methyltricosanoylcarnitine;19-Methyltricosanoylcarnitine;6-Methyltricosanoylcar…	2610.57	2048.28	3583.74	2842.02	3132.71	2244.96	1694.58	1554.45	1378.07	1923.8	1157.39	2286.52	2204.76	2743.71	1665.8	1.6471	up	0.00316326	0.0139527	1.05774
POS	POS_847.682_6.4955	847.682	6.4955	SM 25:1;2O/20:5	78.52	C50H91N2O6P	SM	Sphingomyelin	Ceramide phosphocholines (sphingomyelins) [SP0301]	Phosphosphingolipids [SP03]	Sphingolipids [SP]	"O-Linoleoylcarnitine;(10Z,12Z)-octadeca-10,12-dienoylcarnitine;(9Z,11E)-Octadeca-9,11-dienoylcarnitine;(6Z,9Z)-Octadeca-6,9-dienoylcarnitine;(2E,4E)-Octadeca-2,4-dienoylcarnitine;TG(14:0/18:3(6Z,9Z,12Z)/20:5(5Z,8Z,11Z,14Z,17Z));TG(14:0/20:4(5Z,8Z,11Z,14Z)/18:4(6Z,9Z,12Z,15Z));TG(14:0/18:3(9Z,12Z,15Z)/20:5(5Z,8Z,11Z,14Z,17Z));TG(14:0/18:4(6Z,9Z,12Z,15Z)/20:4(5Z,8Z,11Z,14Z));TG(14:0/18:4(6Z,9Z,12Z…	16270.1	10555	9992.38	14610.7	9714.92	17391.3	4862.06	7147.46	6858.7	7964.17	8711.71	12110.7	10515.8	13089.1	7942.47	1.648	up	0.011022	0.036783	1.00756
POS	POS_512.502_5.2842	512.502	5.2842	Cer(d18:0/14:0)	72.17	C32H65NO3	Cer		N-acylsphinganines (dihydroceramides) [SP0202]	Ceramides [SP02]	Sphingolipids [SP]	Cer(d18:0/14:0)	591101	360791	685520	583526	648260	615037	441026	355291	398864	430198	142443	338026	465840	580706	350975	1.6546	up	0.0255571	0.0707021	1.01582
POS	POS_1024.67_5.7112	1024.67	5.7112	Hex3Cer 18:1;O2/16:0	100	C52H97NO18	Hex3Cer	Trihexosylceramide				Trihexosylceramide (d18:1/16:0)	24590.2	21068.5	24076.5	22920.6	25876.7	23810.8	14855.2	16183.1	15367.3	12526.5	8972.69	18083.6	19027.6	23723.9	14331.4	1.6554	up	0.00275526	0.012548	1.1248
POS	POS_922.65_7.3039	922.65	7.3039	PC O-48:11	76.6	C56H92NO7P	EtherPC	Ether-linked phosphatidylcholine				"PE(DiMe(13,5)/MonoMe(13,5));PE(MonoMe(13,5)/DiMe(13,5));PS(22:4(7Z,10Z,13Z,16Z)/24:1(15Z));PS(22:5(4Z,7Z,10Z,13Z,16Z)/24:0);PS(22:5(7Z,10Z,13Z,16Z,19Z)/24:0);PS(24:0/22:5(4Z,7Z,10Z,13Z,16Z));PS(24:0/22:5(7Z,10Z,13Z,16Z,19Z));PS(24:1(15Z)/22:4(7Z,10Z,13Z,16Z));PE-NMe(11D5/13D5);PE-NMe(13D5/11D5);PE-NMe(13M5/13M5);PE-NMe2(11D5/13M5);PE-NMe2(11M5/13D5);PE-NMe2(13D5/11M5);PE-NMe2(13M5/11D5);PC(22:0/…	13394.1	10204.5	14341.4	13974.8	12065.5	15963.4	8055.96	6471.82	8573.57	8190.47	6904.94	10059.6	10683.3	13324	8042.73	1.6566	up	0.000230681	0.00177843	1.11812
POS	POS_949.719_7.8853	949.719	7.8853	TG 16:0_20:4_22:6	76.37	C61H98O6	TG	Triacylglycerol	Triacylglycerols [GL0301]	Triradylglycerols [GL03]	Glycerolipids [GL]	"TG(18:3(9Z,12Z,15Z)/20:4(5Z,8Z,11Z,14Z)/22:6(4Z,7Z,10Z,13Z,16Z,19Z));TG(20:5(5Z,8Z,11Z,14Z,17Z)/18:2(9Z,12Z)/22:6(4Z,7Z,10Z,13Z,16Z,19Z));TG(20:5(5Z,8Z,11Z,14Z,17Z)/18:3(9Z,12Z,15Z)/22:5(7Z,10Z,13Z,16Z,19Z));TG(22:6(4Z,7Z,10Z,13Z,16Z,19Z)/16:1(9Z)/22:6(4Z,7Z,10Z,13Z,16Z,19Z));TG(16:1(9Z)/22:6(4Z,7Z,10Z,13Z,16Z,19Z)/22:6(4Z,7Z,10Z,13Z,16Z,19Z));TG(20:3(5Z,8Z,11Z)/18:4(6Z,9Z,12Z,15Z)/22:6(4Z,7Z,10…	61767.2	47951.9	70906.3	71346.1	61185.4	72258.6	32622.5	32975.4	40737.7	35753.8	26054.7	64364.8	51493.7	64235.9	38751.5	1.6576	up	0.00574058	0.0222908	1.08781
POS	POS_902.692_6.9437	902.692	6.9437	"PC(24:1(15Z)/18:1(12Z)-2OH(9,10))"	72.79	C50H96NO10P	PC	Phosphatidylcholine	Diacylglycerophosphocholines [GP0101]	Glycerophosphocholines [GP01]	Glycerophospholipids [GP]	"PS(20:0/24:1(15Z));PS(20:1(11Z)/24:0);PS(22:0/22:1(13Z));PS(22:1(13Z)/22:0);PS(24:0/20:1(11Z));PS(24:1(15Z)/20:0);PC(24:1(15Z)/18:1(12Z)-2OH(9,10));PC(18:1(12Z)-2OH(9,10)/24:1(15Z));PC(O-22:1(13Z)/22:3(10Z,13Z,16Z));PC(O-22:2(13Z,16Z)/22:2(13Z,16Z));PC(O-24:0/20:4(8Z,11Z,14Z,17Z))"	22735.9	17009.4	19303.6	16762.5	18170.3	21789.8	6616.1	17599.2	5780.99	17735.4	8089.43	13936.8	15460.8	19295.3	11626.3	1.6596	up	0.0315238	0.0834339	1.06916
NEG	NEG_775.595_6.273	775.595	6.273	SM 25:1;2O/11:0	70.56	C41H83N2O6P	SM	Sphingomyelin	Ceramide phosphocholines (sphingomyelins) [SP0301]	Phosphosphingolipids [SP03]	Sphingolipids [SP]	"SM(d19:0/18:1(12Z)-2OH(9,10));Methyl 2-(10-heptadecenyl)-6-hydroxybenzoate;SM(d18:1/18:0);SM(d18:0/18:1(11Z));SM(d18:0/18:1(9Z));ubiquinol-8;SM(d18:1/17:0);SM(d17:1/18:0);SM(d19:1/16:0)"	310374	276180	332298	313256	283606	351230	173259	195274	186984	200496	187057	178906	249077	311157	186996	1.664	up	2.34748e-06	5.30629e-05	1.17885
POS	POS_904.729_7.7755	904.729	7.7755	TG 18:2_17:3_20:4	100	C58H94O6	TG	Triacylglycerol					21982.6	31637.8	26024.7	25392.3	24246	18044.3	14305	14759.2	17889.6	12199.1	11070.5	18247.9	19649.9	24554.6	14745.2	1.6653	up	0.00102142	0.00573831	1.09429
POS	POS_763.59_6.1949	763.59	6.1949	"SM(d18:0/18:1(12Z)-2OH(9,10))"	79.82	C41H83N2O8P	SM	Sphingomyelin	Ceramide phosphocholines (sphingomyelins) [SP0301]	Phosphosphingolipids [SP03]	Sphingolipids [SP]		446948	516610	460232	462414	547196	453452	227328	274013	281730	297123	335178	314081	384692	481142	288242	1.6692	up	3.43072e-05	0.000404494	1.16901
POS	POS_1014.84_7.897	1014.84	7.897	PC O-28:1_26:6	94.9	C62H112NO7P	EtherPC	Ether-linked phosphatidylcholine					4374.73	3739.8	4302.04	5143.17	4460.4	5102.93	920.912	2452.55	3333.46	4346.92	2286.25	2892.08	3612.94	4520.51	2705.36	1.6709	up	0.0375012	0.0955759	1.06195
POS	POS_942.836_8.7655	942.836	8.7655	TG 19:1_19:1_19:2	99.6	C60H108O6	TG	Triacylglycerol					23717	24934.2	33681.8	31642.2	51957.2	31807.5	11619.3	16913.8	24221.5	23638.1	22495.9	19398.6	26335.6	32956.7	19714.5	1.6717	up	0.0102133	0.0347096	1.01062
POS	POS_795.64_7.8097	795.64	7.8097	MGDG O-19:0_17:0	70.65	C45H88O9	MGDG	Monogalactosyldiacylglycerol				"trans-Hexadec-2-enoyl carnitine;O-Palmitoleoylcarnitine;(11Z)-Hexadecenoylcarnitine;(6Z)-Hexadecenoylcarnitine;4-Hexadecenoylcarnitine;7-Hexadecenoylcarnitine;Hexadecenoylcarnitine;TG(14:0/14:0/18:3(6Z,9Z,12Z));TG(14:0/14:0/18:3(9Z,12Z,15Z));TG(14:0/14:1(9Z)/18:2(9Z,12Z));TG(14:0/18:2(9Z,12Z)/14:1(9Z));TG(14:0/18:3(6Z,9Z,12Z)/14:0);TG(14:0/18:3(9Z,12Z,15Z)/14:0);TG(14:1(9Z)/14:0/18:2(9Z,12Z));TG…	33224	26123.6	40002.5	31921.8	52975.5	37748.4	18134.2	22629.3	24565.4	21972.8	18903.8	26274.7	29539.7	36999.3	22080	1.6757	up	0.00218472	0.0104768	1.07461
POS	POS_720.679_7.5546	720.679	7.5546	CE 22:3	87.3	C49H82O2	CE	Cholesteryl ester				Haloprogin	3213.06	4579.45	3012.67	3258.24	3326.97	3578.57	1723.2	1616.19	1699.01	1225.37	3814.22	2425.49	2789.37	3494.83	2083.91	1.677	up	0.0140779	0.0445661	1.10002
NEG	NEG_866.625_6.431	866.625	6.431	HexCer 46:9;O3	81.8	C52H85NO9	HexCer_HS	Hexosylceramide hydroxyfatty acid-sphingosine				"PE(24:0/20:3(5Z,8Z,11Z)-O(14R,15S));PE(20:3(5Z,8Z,11Z)-O(14R,15S)/24:0);PE(24:0/20:3(5Z,8Z,14Z)-O(11S,12R));PE(20:3(5Z,8Z,14Z)-O(11S,12R)/24:0);PE(24:0/20:3(5Z,11Z,14Z)-O(8,9));PE(20:3(5Z,11Z,14Z)-O(8,9)/24:0);PE(24:0/20:3(8Z,11Z,14Z)-O(5,6));PE(20:3(8Z,11Z,14Z)-O(5,6)/24:0);PE(24:0/20:4(5Z,8Z,11Z,14Z)-OH(20));PE(20:4(5Z,8Z,11Z,14Z)-OH(20)/24:0);PE(24:0/20:4(6E,8Z,11Z,14Z)-OH(5S));PE(20:4(6E,8Z,…	100906	82618.6	103530	99032.5	88556.4	114454	62318.8	55625.3	58080.5	64975.6	56090.7	53533.2	78310.1	98182.8	58437.4	1.6801	up	1.09533e-05	0.000170154	1.17656
POS	POS_459.301_4.2262	459.301	4.2262	DG 23:3	97.2	C26H44O5	DG	Diacylglycerol				"2,4,6,8-Decatetraenoic acid dehydropiperidide;Neopellitorine A;2,4-Undecadiene-8,10-diynoic acid isobutylamide;(E)-6-Methyl-1-(2-methyl-1-oxo-2-butenyl)-1,2,3,4-tetrahydroquinoline;Pronetalol;24,24-Dfhv;Pentanoic acid, 5-(dipentylamino)-5-oxo-4-((3-quinolinylcarbonyl)amino)-, (R)-"	57901.5	50732.8	63143.6	49671.1	39391.4	56481.9	27618.7	24878.3	36398.2	29657.5	34199.7	36009	42173.6	52887	31460.2	1.6811	up	0.000230073	0.00177533	1.13228
POS	POS_667.521_6.8314	667.521	6.8314	DG 38:4	76.94	C41H72O5	DG	Diacylglycerol				"DG(16:0/PGF2alpha/0:0);DG(PGF2alpha/16:0/0:0);DG(16:0/0:0/PGF2alpha);DG(PGF2alpha/0:0/16:0);DG(16:0/PGE1/0:0);DG(PGE1/16:0/0:0);DG(16:0/0:0/PGE1);DG(PGE1/0:0/16:0);DG(16:0/PGD1/0:0);DG(PGD1/16:0/0:0);DG(16:0/0:0/PGD1);DG(PGD1/0:0/16:0);DG(18:0/5-iso PGF2VI/0:0);DG(5-iso PGF2VI/18:0/0:0);DG(18:0/0:0/5-iso PGF2VI);DG(5-iso PGF2VI/0:0/18:0);DG(i-16:0/PGF2alpha/0:0);DG(PGF2alpha/i-16:0/0:0);DG(i-16:…	11204.4	7500.65	13346.2	14060.1	16306	12895.1	5821.1	7747.27	8019.36	6224.27	6924.56	9905.36	9996.2	12552.1	7440.32	1.687	up	0.00419006	0.0174207	1.05675
POS	POS_1185.05_9.1542	1185.05	9.1542	TG 18:0_18:1_18:1;O(FA 18:1)	100	C75H138O8	TG_EST	Triacylglycerol estolides					7215.17	7900.69	8853.62	8517.89	10566.1	6289.33	2201.46	4558.23	3665.19	5217.75	7081.29	6516.89	6548.64	8223.8	4873.47	1.6875	up	0.0194979	0.0572698	1.06922
POS	POS_600.399_2.9032	600.399	2.9032	LPC 24:4-SN1	74.42	C32H58NO7P	LPC	Lysophophatidylcholine	Monoacylglycerophosphocholines [GP0105]	Glycerophosphocholines [GP01]	Glycerophospholipids [GP]	LysoPC(22:1(13Z)/0:0)	9239.15	6727.31	8433.51	9678.1	6121.34	9303.96	5580.57	4601.6	4970.37	5213.8	6085.9	2864.54	6568.34	8250.56	4886.13	1.6886	up	0.00304894	0.0135406	1.09439
POS	POS_695.566_8.5287	695.566	8.5287	DG 40:4	72.79	C43H76O5	DG	Diacylglycerol				"O-Arachidonoyl Ethanolamine;O-(2-Aminoethyl)-5Z,8Z,11Z,14Z-eicosatetraenoate;N-(2-Hydroxyethyl)eicosa-5,8,11,14-tetraenamide;arachidonoylethanolamine;2-(Icosa-5,8,11,14-tetraenylamino)acetic acid;DG(20:1(11Z)/22:6(4Z,7Z,10Z,13Z,16Z,19Z)/0:0);DG(20:2(11Z,14Z)/22:5(4Z,7Z,10Z,13Z,16Z)/0:0);DG(20:2(11Z,14Z)/22:5(7Z,10Z,13Z,16Z,19Z)/0:0);DG(20:3(5Z,8Z,11Z)/22:4(7Z,10Z,13Z,16Z)/0:0);DG(20:3(8Z,11Z,14Z…	45329.4	31570.4	59191.5	49705.9	59826.7	56416.8	30726.2	24381.8	30734.3	31215	23103	38300.1	40041.8	50340.1	29743.4	1.6925	up	0.00227086	0.0107912	1.08341
POS	POS_890.842_9.0482	890.842	9.0482	TG O-18:0_18:0_18:2	100	C57H108O5	EtherTG	Ether-linked triacylglycerol					52658.5	42413.3	39342.8	51591	48369.4	53776.4	13196.5	34618.2	17503.8	32994.3	36637.8	35107.1	38184.1	48025.2	28342.9	1.6944	up	0.0199999	0.0583938	1.09096
POS	POS_1157.02_9.0425	1157.02	9.0425	TG 18:1_18:1_16:0;O(FA 18:1)	100	C73H134O8	TG_EST	Triacylglycerol estolides					13150.4	11615.7	14110.6	12218.4	16660.5	12939	2604.66	7648.88	6667.59	7646.49	11050.9	11862.9	10681.3	13449.1	7913.57	1.6995	up	0.0364828	0.0935453	1.07875
POS	POS_822.632_6.4318	822.632	6.4318	LPC 40:5-SN1	70.9	C48H88NO7P	LPC	Lysophophatidylcholine	Monoacylglycerophosphocholines [GP0105]	Glycerophosphocholines [GP01]	Glycerophospholipids [GP]	"PC(22:4(7Z,10Z,13Z,16Z)/P-18:0);PC(P-18:0/22:4(7Z,10Z,13Z,16Z));PC(O-20:1(11Z)/20:4(8Z,11Z,14Z,17Z));PC(20:0/P-18:1(11Z));PC(20:0/P-18:1(9Z));PC(20:1(11Z)/P-18:0);PC(22:1(13Z)/P-16:0);PC(P-16:0/22:1(13Z));PC(P-18:0/20:1(11Z));PC(P-18:1(11Z)/20:0);PC(P-18:1(9Z)/20:0);PC(O-18:1(9Z)/20:1(11Z));PC(O-18:2(9Z,12Z)/20:0);SM(d18:0/PGF1alpha)"	1.51739e+06	1.45063e+06	1.68222e+06	1.61074e+06	1.47672e+06	1.58425e+06	868730	873343	940553	940358	785292	1.06435e+06	1.23288e+06	1.55366e+06	912105	1.7034	up	4.40246e-06	8.49275e-05	1.21027
POS	POS_831.689_6.7398	831.689	6.7398	SM 42:1;3O	87.75	C47H95N2O7P	SM	Sphingomyelin	Ceramide phosphocholines (sphingomyelins) [SP0301]	Phosphosphingolipids [SP03]	Sphingolipids [SP]	PA(20:0/a-25:0);PA(21:0/i-24:0);PA(a-21:0/i-24:0);PA(a-25:0/20:0);PA(a-25:0/i-20:0);PA(i-20:0/a-25:0);PA(i-21:0/i-24:0);PA(i-24:0/21:0);PA(i-24:0/a-21:0);PA(i-24:0/i-21:0);TG(14:0/15:0/18:0);TG(14:0/18:0/15:0);TG(15:0/14:0/18:0);TG(15:0/16:0/16:0);TG(16:0/15:0/16:0);TG(i-20:0/i-14:0/i-13:0);TG(i-20:0/8:0/19:0);TG(i-20:0/13:0/i-14:0);TG(i-20:0/8:0/i-19:0);TG(i-20:0/a-15:0/12:0);TG(20:0/12:0/i-15:0…	346238	480981	385572	382067	321068	386484	281801	246344	242471	256863	70747.4	252588	304435	383735	225136	1.7045	up	0.0351118	0.0907893	1.07345
POS	POS_852.702_7.6938	852.702	7.6938	TG 13:1_18:2_20:4	100	C54H90O6	TG	Triacylglycerol				"TG(15:0/14:1(9Z)/22:6(4Z,7Z,10Z,13Z,16Z,19Z));TG(15:0/18:3(6Z,9Z,12Z)/18:4(6Z,9Z,12Z,15Z));TG(15:0/18:3(9Z,12Z,15Z)/18:4(6Z,9Z,12Z,15Z));TG(15:0/18:4(6Z,9Z,12Z,15Z)/18:3(6Z,9Z,12Z));TG(15:0/18:4(6Z,9Z,12Z,15Z)/18:3(9Z,12Z,15Z));TG(15:0/22:6(4Z,7Z,10Z,13Z,16Z,19Z)/14:1(9Z));TG(14:1(9Z)/15:0/22:6(4Z,7Z,10Z,13Z,16Z,19Z));TG(18:3(6Z,9Z,12Z)/15:0/18:4(6Z,9Z,12Z,15Z));TG(18:3(9Z,12Z,15Z)/15:0/18:4(6Z,…	40458.4	57437.1	42607	44979.2	58893	46376.4	25761.5	24059.3	27622.8	25745.1	38090.9	28770.6	38400.1	48458.5	28341.7	1.7098	up	0.000167886	0.001392	1.16123
POS	POS_820.732_8.207	820.732	8.207	TG(16:0/16:1(9Z)/16:1(9Z))[iso3]	76.93	C51H94O6	TG	Triacylglycerol	Triacylglycerols [GL0301]	Triradylglycerols [GL03]	Glycerolipids [GL]	"TG(16:0/16:1(9Z)/16:1(9Z));TG(16:0/14:0/18:2(9Z,12Z));TG(16:1(9Z)/14:0/18:1(11Z));TG(16:1(9Z)/14:0/18:1(9Z));SM(d18:0/23:0);15-Palmitoylsolamin;TG(14:0/14:0/20:2n6);TG(14:0/16:0/18:2(9Z,12Z));TG(14:0/14:1(9Z)/20:1(11Z));TG(14:0/16:1(9Z)/18:1(11Z));TG(14:0/16:1(9Z)/18:1(9Z));TG(14:0/18:1(11Z)/16:1(9Z));TG(14:0/18:1(9Z)/16:1(9Z));TG(14:0/20:1(11Z)/14:1(9Z));TG(14:0/18:2(9Z,12Z)/16:0);TG(14:0/20:2n…	2.27088e+06	2.83561e+06	2.46535e+06	2.38756e+06	2.12153e+06	2.50493e+06	1.20485e+06	1.3811e+06	1.45634e+06	1.38592e+06	1.6959e+06	1.3929e+06	1.92524e+06	2.43098e+06	1.4195e+06	1.7126	up	4.78325e-06	9.01274e-05	1.20235
POS	POS_993.827_7.7152	993.827	7.7152	SM 54:4;O2	88.8	C59H113N2O7P	SM	Sphingomyelin				"TG(15:0/24:0/20:3(5Z,8Z,11Z));TG(15:0/24:0/20:3n6);TG(15:0/20:3(5Z,8Z,11Z)/24:0);TG(15:0/22:1(13Z)/22:2(13Z,16Z));TG(15:0/24:1(15Z)/20:2n6);TG(15:0/20:2n6/24:1(15Z));TG(15:0/20:3n6/24:0);TG(15:0/22:2(13Z,16Z)/22:1(13Z));TG(24:0/15:0/20:3(5Z,8Z,11Z));TG(24:0/15:0/20:3n6);TG(22:1(13Z)/15:0/22:2(13Z,16Z));TG(22:4(7Z,10Z,13Z,16Z)/22:5(4Z,7Z,10Z,13Z,16Z)/O-18:0);TG(22:4(7Z,10Z,13Z,16Z)/22:5(7Z,10Z,13…	53394.6	75262.1	55280.5	58693.2	25923	57871.7	33379.5	27367.9	29911.7	30964.9	45891	22699.2	43053.3	54404.2	31702.4	1.7161	up	0.0173195	0.0524025	1.00458
POS	POS_928.812_8.562	928.812	8.562	TG 18:1_18:1_20:2	100	C59H106O6	TG	Triacylglycerol					1.38206e+06	1.9096e+06	1.54126e+06	2.03603e+06	1.39613e+06	1.70184e+06	756930	931130	1.08859e+06	1.00297e+06	1.1025e+06	918506	1.31396e+06	1.66115e+06	966770	1.7182	up	0.000112829	0.00102118	1.16739
POS	POS_802.532_5.3841	802.532	5.3841	PC(16:1(9Z)/5-iso PGF2VI)	77.12	C42H76NO11P	PC	Phosphatidylcholine	Diacylglycerophosphocholines [GP0101]	Glycerophosphocholines [GP01]	Glycerophospholipids [GP]	"PC(18:3(6Z,9Z,12Z)/20:5(5Z,8Z,11Z,14Z,17Z));PC(18:3(9Z,12Z,15Z)/20:5(5Z,8Z,11Z,14Z,17Z));PC(18:4(6Z,9Z,12Z,15Z)/20:4(5Z,8Z,11Z,14Z));PC(18:4(6Z,9Z,12Z,15Z)/20:4(8Z,11Z,14Z,17Z));PC(20:4(5Z,8Z,11Z,14Z)/18:4(6Z,9Z,12Z,15Z));PC(20:4(8Z,11Z,14Z,17Z)/18:4(6Z,9Z,12Z,15Z));PC(20:5(5Z,8Z,11Z,14Z,17Z)/18:3(6Z,9Z,12Z));PC(20:5(5Z,8Z,11Z,14Z,17Z)/18:3(9Z,12Z,15Z));PE-NMe(20:4(5Z,8Z,11Z,14Z)/20:4(5Z,8Z,11Z,…	94265.8	92247.2	111454	112288	76737.2	109893	39940.4	53944.2	52400.3	61910.9	69135.3	69974.5	78682.6	99481	57884.3	1.7186	up	0.000556425	0.00356821	1.15547
NEG	NEG_774.542_6.3912	774.542	6.3912	PE O-18:1_22:6	100	C45H78NO7P	EtherPE	Ether-linked phosphatidylethanolamine				"PE(22:5(4Z,7Z,10Z,13Z,16Z)/P-18:1(11Z));PE(22:5(4Z,7Z,10Z,13Z,16Z)/P-18:1(9Z));PE(22:5(7Z,10Z,13Z,16Z,19Z)/P-18:1(11Z));PE(22:5(7Z,10Z,13Z,16Z,19Z)/P-18:1(9Z));PE(22:6(4Z,7Z,10Z,13Z,16Z,19Z)/P-18:0);PE(P-18:0/22:6(4Z,7Z,10Z,13Z,16Z,19Z));PE(P-18:1(11Z)/22:5(4Z,7Z,10Z,13Z,16Z));PE(P-18:1(11Z)/22:5(7Z,10Z,13Z,16Z,19Z));PE(P-18:1(9Z)/22:5(4Z,7Z,10Z,13Z,16Z));PE(P-18:1(9Z)/22:5(7Z,10Z,13Z,16Z,19Z))"	40945.2	32986.3	42887.2	41633.2	32986.6	46978.9	22369.7	17419.8	24511.5	26867.5	25501.5	21696.2	31398.6	39736.2	23061	1.7231	up	9.26502e-05	0.000878297	1.17593
POS	POS_960.756_7.6537	960.756	7.6537	ASG 27:1;O;Hex;FA 28:6	100	C61H98O7	AHexCS	Acylhexosyl cholesterol				PS(24:0/24:0)	17820.2	24788.6	23588.9	20296.9	23185.6	21335.2	11232	11654.4	12045.7	9911.71	17228.7	13845.2	17244.4	21835.9	12653	1.7258	up	0.000266655	0.00199468	1.18352
POS	POS_356.351_2.3676	356.351	2.3676	Arachidoyl Ethanolamide	83.26	C22H45NO2	NAE	N-acyl ethanolamines	N-acyl ethanolamides (endocannabinoids) [FA0804]	Fatty amides [FA08]	Fatty Acyls [FA]	"Arachidoyl Ethanolamide;Erucic acid;Cetoleic acid;Phytyl acetate;7,9-Docosanedione;6,8-Docosanedione;5,7-Docosanedione;4,6-Docosanedione;N-butyl Oleate;Brassidic acid;15-Docosenoic acid;Docosenic acid;Docosenoic acid"	267440	238250	309176	291665	288376	258927	173882	152985	157596	166248	174061	132880	217624	275639	159609	1.727	up	2.30589e-06	5.24429e-05	1.21508
POS	POS_936.788_8.2716	936.788	8.2716	TG 17:1_19:2_21:4	100	C60H102O6	TG	Triacylglycerol					131299	156578	144747	138538	227639	147190	62045.4	75473.4	101041	70072.3	96649.8	140784	124338	157665	91011.1	1.7324	up	0.00388649	0.0164112	1.12154
POS	POS_1349.14_6.4605	1349.14	6.4605	PC 37:0_40:8	74.32	C85H154NO8P	PC	Phosphatidylcholine	Diacylglycerophosphocholines [GP0101]	Glycerophosphocholines [GP01]	Glycerophospholipids [GP]		8531.87	12071.2	7741.17	8072.1	11009.3	5914.32	6043.67	2222.14	5921.83	4731.48	3912.95	7931.5	7008.63	8890	5127.26	1.7339	up	0.0214242	0.061615	1.06505
POS	POS_940.813_8.5131	940.813	8.5131	TG 19:1_19:2_19:2	100	C60H106O6	TG	Triacylglycerol					65849.8	73326.9	78046.9	77494.1	56303.4	82977.1	35040.8	43956.1	38412.4	47096.1	48039.2	37412	56996.2	72333	41659.4	1.7363	up	3.92378e-05	0.000449147	1.19418
POS	POS_759.632_6.6288	759.632	6.6288	SM 35:1;2O/3:0	91.96	C43H87N2O6P	SM	Sphingomyelin	Ceramide phosphocholines (sphingomyelins) [SP0301]	Phosphosphingolipids [SP03]	Sphingolipids [SP]	N-Linoleoyl Valine;SM(d18:1/20:0);SM(d16:1/22:0)	2.90086e+06	3.99537e+06	2.98584e+06	3.18157e+06	2.86593e+06	3.21284e+06	2.05859e+06	1.85e+06	1.97329e+06	1.89028e+06	1.59494e+06	1.65157e+06	2.51342e+06	3.1904e+06	1.83644e+06	1.7373	up	8.91253e-06	0.000145789	1.20998
POS	POS_768.697_8.1983	768.697	8.1983	TG 12:0_16:0_16:0	100	C47H90O6	TG	Triacylglycerol					110940	172107	124277	137182	172347	117728	60711	52294.7	85111.4	89868.5	99745.7	92270.7	109549	139097	80000.3	1.7387	up	0.00195654	0.00958564	1.1365
POS	POS_678.505_5.2917	678.505	5.2917	PC 28:0	80.32	C36H72NO8P	PC	Phosphatidylcholine	Diacylglycerophosphocholines [GP0101]	Glycerophosphocholines [GP01]	Glycerophospholipids [GP]	"PC(14:0/14:0);PE(15:0/16:0);PE(16:0/15:0);PE-NMe(15:0/15:0);PE-NMe(14:0/16:0);PE-NMe(16:0/14:0);PE-NMe2(14:0/15:0);PE-NMe2(15:0/14:0);Dimyristoylphosphatidylcholine, DL-;Cer(d18:0/PGF1alpha);DG(18:4(6Z,9Z,12Z,15Z)/22:6(4Z,7Z,10Z,13Z,16Z,19Z)/0:0);DG(20:5(5Z,8Z,11Z,14Z,17Z)/20:5(5Z,8Z,11Z,14Z,17Z)/0:0);DG(22:6(4Z,7Z,10Z,13Z,16Z,19Z)/18:4(6Z,9Z,12Z,15Z)/0:0);DG(18:4n3/0:0/22:6n3);DG(20:5n3/0:0/20:…	21093	15455.6	20777.1	23096.4	26546	21316.8	11453.5	12310.7	10698.1	12147	4497.79	22142.9	16794.6	21380.8	12208.3	1.7513	up	0.0256882	0.0709663	1.12315
POS	POS_838.556_4.3224	838.556	4.3224	"PC(DiMe(9,3)/20:3(6,8,11)-OH(5))"	71.31	C46H80NO10P	PC	Phosphatidylcholine	Diacylglycerophosphocholines [GP0101]	Glycerophosphocholines [GP01]	Glycerophospholipids [GP]	"PS(18:0/22:5(7Z,10Z,13Z,16Z,19Z));PE(DiMe(11,3)/MonoMe(11,5));PE(DiMe(11,5)/MonoMe(11,3));PE(DiMe(11,5)/MonoMe(9,5));PE(DiMe(9,3)/MonoMe(13,5));PE(DiMe(9,5)/MonoMe(11,5));PE(MonoMe(11,3)/DiMe(11,5));PE(MonoMe(11,5)/DiMe(11,3));PE(MonoMe(11,5)/DiMe(9,5));PE(MonoMe(13,5)/DiMe(9,3));PE(MonoMe(9,5)/DiMe(11,5));PS(18:0/22:5(4Z,7Z,10Z,13Z,16Z));PS(18:1(11Z)/22:4(7Z,10Z,13Z,16Z));PS(18:1(9Z)/22:4(7Z,10…	12213.8	12646.3	12961.7	10437	17007.4	10479.6	6073.72	5513.71	6692.22	6296.86	12389.7	6242.78	9912.91	12624.3	7201.49	1.753	up	0.00277676	0.0126303	1.15884
POS	POS_881.709_7.3358	881.709	7.3358	SM 30:1;2O(FA 16:2)	74.14	C51H97N2O7P	SM	Sphingomyelin	Ceramide phosphocholines (sphingomyelins) [SP0301]	Phosphosphingolipids [SP03]	Sphingolipids [SP]	Momordol	56122.1	59858.8	55385.9	57612.2	62009.3	50918.2	31211.5	12654.7	9765.82	76318.4	26483.4	37001	44611.8	56984.4	32239.1	1.7676	up	0.0479938	0.116195	1.19569
POS	POS_804.7_7.9495	804.7	7.9495	TG 13:1_17:1_17:1	100	C50H90O6	TG	Triacylglycerol				"SM(d18:0/22:1(13Z));SM(d18:1/22:0);TG(14:0/15:0/18:3(6Z,9Z,12Z));TG(14:0/15:0/18:3(9Z,12Z,15Z));TG(14:0/18:3(6Z,9Z,12Z)/15:0);TG(14:0/18:3(9Z,12Z,15Z)/15:0);TG(15:0/14:0/18:3(6Z,9Z,12Z));TG(15:0/14:0/18:3(9Z,12Z,15Z));TG(15:0/14:1(9Z)/18:2(9Z,12Z));TG(15:0/18:2(9Z,12Z)/14:1(9Z));TG(14:1(9Z)/15:0/18:2(9Z,12Z))"	142152	222174	148674	159562	163408	162420	78137.9	80906.3	97770.3	90701.3	114407	102285	130217	166398	94034.7	1.7695	up	6.88241e-05	0.000700865	1.20699
POS	POS_886.627_6.017	886.627	6.017	PC 22:4_22:4	75.89	C52H88NO8P	PC	Phosphatidylcholine	Diacylglycerophosphocholines [GP0101]	Glycerophosphocholines [GP01]	Glycerophospholipids [GP]	"PC(22:2(13Z,16Z)/22:6(4Z,7Z,10Z,13Z,16Z,19Z));PC(22:4(7Z,10Z,13Z,16Z)/22:4(7Z,10Z,13Z,16Z));PC(22:6(4Z,7Z,10Z,13Z,16Z,19Z)/22:2(13Z,16Z));PC(18:4(6Z,9Z,12Z,15Z)/24:1(15Z));PC(20:0/22:5(4Z,7Z,10Z,13Z,16Z));PC(20:0/22:5(7Z,10Z,13Z,16Z,19Z));PC(20:1(11Z)/22:4(7Z,10Z,13Z,16Z));PC(20:3(5Z,8Z,11Z)/22:2(13Z,16Z));PC(20:3(8Z,11Z,14Z)/22:2(13Z,16Z));PC(20:4(5Z,8Z,11Z,14Z)/22:1(13Z));PC(20:4(8Z,11Z,14Z,17…	19618	20253.2	20124.9	24063.4	26885.8	20388.3	13860.8	10760.8	16477.8	12817.6	5720.01	14556.7	17127.3	21888.9	12365.6	1.7701	up	0.0090301	0.0316127	1.16002
POS	POS_706.582_5.8295	706.582	5.8295	PC 31:0e	77.99	C39H80NO7P	PC	Phosphatidylcholine	Diacylglycerophosphocholines [GP0101]	Glycerophosphocholines [GP01]	Glycerophospholipids [GP]	SM(d18:1/15:0);SM(d16:1/17:0)	191714	373022	206102	207046	219900	192394	136594	121754	139003	144784	62207.8	177167	180974	231696	130252	1.7788	up	0.00935855	0.0325082	1.1031
POS	POS_778.686_7.9002	778.686	7.9002	TG 11:0_16:1_18:1	100	C48H88O6	TG	Triacylglycerol				"SM(d18:0/20:0);TG(15:0/14:1(9Z)/16:1(9Z));TG(15:0/16:1(9Z)/14:1(9Z));TG(14:1(9Z)/15:0/16:1(9Z));DG(a-25:0/20:3(6,8,11)-OH(5)/0:0);DG(20:3(6,8,11)-OH(5)/a-25:0/0:0);DG(a-25:0/0:0/20:3(6,8,11)-OH(5));DG(20:3(6,8,11)-OH(5)/0:0/a-25:0)"	112782	159441	113322	122191	138190	117958	50604.9	58434.1	64589.2	64916.2	122518	66699	99303.9	127314	71293.6	1.7858	up	0.00279207	0.0126723	1.20113
POS	POS_817.552_5.6688	817.552	5.6688	DG 50:13	93.2	C53H78O5	DG	Diacylglycerol				"Sinapoylspermine;PA(21:0/PGF2alpha);PA(PGF2alpha/21:0);PA(21:0/PGE1);PA(PGE1/21:0);PA(21:0/PGD1);PA(PGD1/21:0);PA(a-21:0/PGF2alpha);PA(PGF2alpha/a-21:0);PA(a-21:0/PGE1);PA(PGE1/a-21:0);PA(a-21:0/PGD1);PA(PGD1/a-21:0);PA(i-21:0/PGF2alpha);PA(PGF2alpha/i-21:0);PA(i-21:0/PGE1);PA(PGE1/i-21:0);PA(i-21:0/PGD1);PA(PGD1/i-21:0);PG(18:0/20:3(6,8,11)-OH(5));PG(20:3(6,8,11)-OH(5)/18:0);PG(20:1(11Z)/18:1(1…	30984.8	14635.6	32668.7	23503.1	18667.8	22516.5	14593.3	13330.1	14062.9	10209.7	12532.9	15071.7	18564.8	23829.4	13300.1	1.7917	up	0.00475937	0.0192446	1.11393
POS	POS_853.716_8.4151	853.716	8.4151	TG 16:0_16:0_18:2	71.99	C53H98O6	TG	Triacylglycerol	Triacylglycerols [GL0301]	Triradylglycerols [GL03]	Glycerolipids [GL]		44325.7	32072.9	69951.2	53238.8	76975.9	67387.9	38958.8	38930.7	25973.1	29821.3	25066.7	32032.3	44561.3	57325.4	31797.1	1.8028	up	0.00705854	0.0261588	1.09502
POS	POS_372.31_2.7881	372.31	2.7881	MG 18:2	100	C21H38O4	MG	Monoacylglycerol				"4-Methyltridecanoylcarnitine;11-Methyltridecanoylcarnitine;3-Methyltridecanoylcarnitine;5-Methyltridecanoylcarnitine;8-Methyltridecanoylcarnitine;7-Methyltridecanoylcarnitine;6-Methyltridecanoylcarnitine;9-Methyltridecanoylcarnitine;12-Methyltridecanoylcarnitine;10-methyltridecanoylcarnitine;N-Stearoyl Serine;Myristoylcarnitine;MG(0:0/18:2(9Z,12Z)/0:0);MG(18:2(9Z,12Z)/0:0/0:0);Glyceryl monolinol…	12497.1	15141.2	14664.4	11708.7	8036.03	13479.4	6496.82	6433.65	6949.33	7100.51	9670.53	5188.47	9780.51	12587.8	6973.22	1.8052	up	0.000891496	0.00514899	1.17878
POS	POS_676.595_8.4634	676.595	8.4634	CE 19:4	100	C46H74O2	CE	Cholesteryl ester				Cer(d18:0/23:0)	44686.2	48130.8	53888.2	49948.3	63529.1	61169.1	22375	29354.2	33530.8	30495	24967.1	37074	41595.6	53558.6	29632.7	1.8074	up	0.000124093	0.0010992	1.23268
POS	POS_736.516_3.0878	736.516	3.0878	PC O-34:6	85	C42H74NO7P	EtherPC	Ether-linked phosphatidylcholine				"PS(16:0/16:0);PS(14:0/18:0);PS(18:0/14:0);PE(15:0/18:1(12Z)-2OH(9,10));PE(18:1(12Z)-2OH(9,10)/15:0);N-[(4E,8Z)-1,3-dihydroxyoctadeca-4,8-dien-2-yl]hexadecanamide 1-glucoside;PG(16:1(9Z)/16:1(9Z))"	1433.61	2104.08	1851.09	872.527	1753.58	1616.74	1101.41	317.956	400.242	529.342	599.627	2379.92	1246.68	1605.27	888.083	1.8076	up	0.0437738	0.107964	1.19263
POS	POS_647.454_6.099	647.454	6.099	DG 37:7	98.1	C40H64O5	DG	Diacylglycerol				DG(13:0/PGF2alpha/0:0);DG(PGF2alpha/13:0/0:0);DG(13:0/0:0/PGF2alpha);DG(PGF2alpha/0:0/13:0);DG(13:0/PGE1/0:0);DG(PGE1/13:0/0:0);DG(13:0/0:0/PGE1);DG(PGE1/0:0/13:0);DG(13:0/PGD1/0:0);DG(PGD1/13:0/0:0);DG(13:0/0:0/PGD1);DG(PGD1/0:0/13:0);DG(15:0/5-iso PGF2VI/0:0);DG(5-iso PGF2VI/15:0/0:0);DG(15:0/0:0/5-iso PGF2VI);DG(5-iso PGF2VI/0:0/15:0);DG(a-13:0/PGF2alpha/0:0);DG(PGF2alpha/a-13:0/0:0);DG(a-13:0…	8087.04	7953.54	7603.74	6798.53	6271.1	8721.15	4682.92	3483.45	4948.77	3905.69	1594.65	6459.46	5875.83	7572.51	4179.15	1.812	up	0.0177126	0.0532447	1.17798
NEG	NEG_524.276_1.9671	524.276	1.9671	LPE 22:6	100	C27H44NO7P	LPE	Lysophosphatidylethanolamine				"LysoPE(0:0/22:6(4Z,7Z,10Z,13Z,16Z,19Z));LysoPE(22:6(4Z,7Z,10Z,13Z,16Z,19Z)/0:0)"	8272.72	7141.18	7541.29	8597.21	8049.33	9120.08	5133.55	5058.64	4228.17	4575.58	3986.32	3696.74	6283.4	8120.3	4446.5	1.8262	up	7.40719e-06	0.00012645	1.27722
POS	POS_634.535_6.4195	634.535	6.4195	DG 18:2_18:2	100	C39H68O5	DG	Diacylglycerol				"DG(14:0/22:4(7Z,10Z,13Z,16Z)/0:0);DG(16:0/20:4(5Z,8Z,11Z,14Z)/0:0);DG(16:0/20:4(8Z,11Z,14Z,17Z)/0:0);DG(16:1(9Z)/20:3(5Z,8Z,11Z)/0:0);DG(16:1(9Z)/20:3(8Z,11Z,14Z)/0:0);DG(18:0/18:4(6Z,9Z,12Z,15Z)/0:0);DG(18:1(11Z)/18:3(6Z,9Z,12Z)/0:0);DG(18:1(11Z)/18:3(9Z,12Z,15Z)/0:0);DG(18:1(9Z)/18:3(6Z,9Z,12Z)/0:0);DG(18:1(9Z)/18:3(9Z,12Z,15Z)/0:0);DG(18:2(9Z,12Z)/18:2(9Z,12Z)/0:0);DG(18:3(6Z,9Z,12Z)/18:1(11Z…	119162	93341	125396	109786	105164	110290	53125.7	43397.9	71432.9	43997.8	66420.5	84049.2	85463.6	110523	60404	1.8297	up	0.00144659	0.00754235	1.24073
NEG	NEG_311.295_5.4869	311.295	5.4869	FA 20:0	100	C20H40O2	FA	Fatty acyls	Straight chain fatty acids [FA0101]	Fatty Acids and Conjugates [FA01]	Fatty Acyls [FA]	"3D,7D,11D-Phytanic acid;3L,7D,11D-Phytanic acid;Phytanic acid;Arachidic acid;2,2,6,10,14-Pentamethylpentadecanoic acid;Ethyl stearate;5-Hydroxy-7-eicosanone;4-Hydroxy-6-eicosanone;3,7R,11R,15-tetramethyl-hexadecanoic acid;Emulphor;Butyl palmitate;Menthol;Decanal;(E)-3-decen-1-ol;2-Decanone;cis-4-Decenol;3-Decanone;3,7-Dimethyloctanal;(+/-)-4-Ethyloctanal;2-DECENOL;Menthanol;p-Menthan-4-ol;(+)-Ne…	5327.84	6417.02	5418.27	8892.5	6797.73	4908.48	2736.23	2905.4	4352.77	4489.27	2822.68	3295.69	4863.66	6293.64	3433.67	1.8329	up	0.00073238	0.00441357	1.19898
POS	POS_1066.94_7.4633	1066.94	7.4633	PC 56:2	70.2	C64H124NO8P	PC	Phosphatidylcholine					2530.31	3929.43	1997.08	2534.19	4862.94	2296.02	1172.15	1943.32	1679.31	1323.89	1058.73	2724.94	2337.69	3025	1650.39	1.8329	up	0.012801	0.0413647	1.09292
POS	POS_1155.04_6.8701	1155.04	6.8701	PC 25:0_37:0	70.24	C70H140NO8P	PC	Phosphatidylcholine	Diacylglycerophosphocholines [GP0101]	Glycerophosphocholines [GP01]	Glycerophospholipids [GP]		34933.4	34704.9	43793.4	31999.2	46557.1	24321.6	22723.9	15491.3	17934.4	16408	16362.6	29034.6	27855.4	36051.6	19659.1	1.8338	up	0.00129437	0.00691515	1.18831
POS	POS_797.622_6.4525	797.622	6.4525	SM 40:4;3O	83.07	C45H85N2O7P	SM	Sphingomyelin	Ceramide phosphocholines (sphingomyelins) [SP0301]	Phosphosphingolipids [SP03]	Sphingolipids [SP]	"SM(d20:1/20:3(6,8,11)-OH(5));DG(a-25:0/20:4(6Z,8E,10E,14Z)-2OH(5S,12R)/0:0);DG(20:4(6Z,8E,10E,14Z)-2OH(5S,12R)/a-25:0/0:0);DG(a-25:0/0:0/20:4(6Z,8E,10E,14Z)-2OH(5S,12R));DG(20:4(6Z,8E,10E,14Z)-2OH(5S,12R)/0:0/a-25:0);DG(a-25:0/20:4(6E,8Z,11Z,13E)-2OH(5S,15S)/0:0);DG(20:4(6E,8Z,11Z,13E)-2OH(5S,15S)/a-25:0/0:0);DG(a-25:0/0:0/20:4(6E,8Z,11Z,13E)-2OH(5S,15S));DG(20:4(6E,8Z,11Z,13E)-2OH(5S,15S)/0:0/a…	3.95246e+06	4.60464e+06	4.17502e+06	4.19492e+06	3.74714e+06	4.12757e+06	2.3466e+06	2.39849e+06	2.44643e+06	2.33449e+06	1.84112e+06	2.15053e+06	3.19328e+06	4.13363e+06	2.25294e+06	1.8348	up	1.37554e-06	3.54158e-05	1.29292
NEG	NEG_301.216_2.7562	301.216	2.7562	FA 20:5	100	C20H30O2	FA	Fatty acyls	Unsaturated fatty acids [FA0103]	Fatty Acids and Conjugates [FA01]	Fatty Acyls [FA]	"Eicosapentaenoic acid;Retinyl ester;Methyltestosterone;8,15-Isopimaradien-18-oic acid;Siderone;Yucalexin B14;Yucalexin A16;8(17),12-Labdadiene-15,16-dial;Cascarillone;8,13-Abietadien-18-oic acid;(ent-15beta,16beta)-15,16-Epoxy-3-kauranone;ent-8(17),13(16),14-Labdatrien-18-oic acid;Methenolone;(1R,4Ar,7S)-1,4a,7-Trimethyl-7-vinyl-1,2,3,4,4a,6,7,8,8a,9,10,10a-dodecahydro-phenanthrene-1-carboxylic …	8745.26	6558.91	7735.22	9082.08	6876.82	9662.62	4652.29	4767.95	4680.35	4624.32	4184.22	3590.13	6263.35	8110.15	4416.54	1.8363	up	3.08437e-05	0.000373333	1.25816
POS	POS_643.525_6.5015	643.525	6.5015	DG 36:2	100	C39H72O5	DG	Diacylglycerol	Diacylglycerols [GL0201]	Diradylglycerols [GL02]	Glycerolipids [GL]	"DG(16:0/22:5(4Z,7Z,10Z,13Z,16Z)/0:0);DG(16:0/22:5(7Z,10Z,13Z,16Z,19Z)/0:0);DG(16:1(9Z)/22:4(7Z,10Z,13Z,16Z)/0:0);DG(18:0/20:5(5Z,8Z,11Z,14Z,17Z)/0:0);DG(18:1(11Z)/20:4(5Z,8Z,11Z,14Z)/0:0);DG(18:1(11Z)/20:4(8Z,11Z,14Z,17Z)/0:0);DG(18:1(9Z)/20:4(5Z,8Z,11Z,14Z)/0:0);DG(18:1(9Z)/20:4(8Z,11Z,14Z,17Z)/0:0);DG(18:2(9Z,12Z)/20:3(5Z,8Z,11Z)/0:0);DG(18:2(9Z,12Z)/20:3(8Z,11Z,14Z)/0:0);DG(18:3(6Z,9Z,12Z)/20…	12676.5	11499.8	6740.86	9172.94	8668.89	12075.4	6259.71	6606.18	3048.44	7787.04	5619.33	3760.33	7826.29	10139.1	5513.51	1.839	up	0.00615375	0.0235426	1.16647
NEG	NEG_462.297_2.7886	462.297	2.7886	LPE O-18:2	100	C23H46NO6P	EtherLPE	Ether-linked lysophosphatidylethanolamine				LysoPE(P-18:1(9Z)/0:0);Gentamicin C2;Micronomicin;N-Linoleoyl Histidine	57613.4	45796.8	52658.2	60884.3	50242.1	66616	32616.3	33325.6	29436.3	31706.7	28843.8	24762.7	42875.2	55635.1	30115.2	1.8474	up	8.6713e-06	0.000142443	1.27585
POS	POS_842.784_8.8055	842.784	8.8055	SE 28:1/30:5	88	C58H96O2	CASE	Campesterol ester					4776.39	4737.19	5454.74	6818.38	7449.37	6752.92	2116.76	1911.9	3188.85	3217.48	4645.35	4379.7	4620.75	5998.17	3243.34	1.8494	up	0.005198	0.0206572	1.19791
NEG	NEG_581.525_6.4708	581.525	6.4708	FA 40:5	100	C40H70O2	FA	Fatty acyls					435475	303758	412905	354942	330150	338902	208815	202665	234712	183758	172522	173846	279371	362689	196053	1.85	up	1.05646e-05	0.000165934	1.27483
POS	POS_746.602_6.4601	746.602	6.4601	PC(16:0/P-18:0)	81.09	C42H84NO7P	PC	Phosphatidylcholine	Diacylglycerophosphocholines [GP0101]	Glycerophosphocholines [GP01]	Glycerophospholipids [GP]	PC(16:0/P-18:0);PC(18:0/P-16:0);PC(P-16:0/18:0);PC(P-18:0/16:0);PC(O-16:1(9Z)/18:0);PC(O-18:1(11Z)/16:0);PC(O-18:1(9Z)/16:0);Ubiquinol 8	4.24949e+06	4.95431e+06	4.45346e+06	4.42269e+06	3.70158e+06	4.43551e+06	2.5003e+06	2.3881e+06	2.53172e+06	2.46555e+06	2.02901e+06	2.24115e+06	3.36441e+06	4.36951e+06	2.35931e+06	1.852	up	3.59269e-07	1.328e-05	1.29965
POS	POS_703.572_5.829	703.572	5.829	SM(d18:1/16:0)	96.79	C39H79N2O6P	SM	Sphingomyelin	Ceramide phosphocholines (sphingomyelins) [SP0301]	Phosphosphingolipids [SP03]	Sphingolipids [SP]	"SM(d18:1/16:0);SM(d18:0/16:1(9Z));CE(PGJ2);Campesteryl elaidate;alpha-Amyrin palmitate;beta-Amyrin palmitate;Taraxasterol palmitate;Sambuculin A;5,5'-diferulic acid;8,5'-diferulic acid"	2.16417e+07	1.41887e+07	2.28615e+07	2.31151e+07	1.89849e+07	2.28606e+07	1.23947e+07	1.25717e+07	1.24554e+07	1.30731e+07	5.8326e+06	1.03922e+07	1.58643e+07	2.06088e+07	1.11199e+07	1.8533	up	0.00241918	0.0113449	1.21001
POS	POS_754.532_6.1209	754.532	6.1209	PC 17:2_17:2	70.08	C42H76NO8P	PC	Phosphatidylcholine	Diacylglycerophosphocholines [GP0101]	Glycerophosphocholines [GP01]	Glycerophospholipids [GP]	"PC(14:0/20:4(5Z,8Z,11Z,14Z));PC(14:0/20:4(8Z,11Z,14Z,17Z));PC(14:1(9Z)/20:3(5Z,8Z,11Z));PC(14:1(9Z)/20:3(8Z,11Z,14Z));PC(16:0/18:4(6Z,9Z,12Z,15Z));PC(16:1(9Z)/18:3(6Z,9Z,12Z));PC(16:1(9Z)/18:3(9Z,12Z,15Z));PC(18:3(6Z,9Z,12Z)/16:1(9Z));PC(18:3(9Z,12Z,15Z)/16:1(9Z));PC(18:4(6Z,9Z,12Z,15Z)/16:0);PC(20:3(5Z,8Z,11Z)/14:1(9Z));PC(20:3(8Z,11Z,14Z)/14:1(9Z));PC(20:4(5Z,8Z,11Z,14Z)/14:0);PC(20:4(8Z,11Z,1…	15703	12287.6	11912.7	11794.7	24999.7	13810.4	7304.16	7251.44	10264.4	8993.51	8111.68	6812.72	11603.8	15084.7	8122.99	1.857	up	0.00243951	0.0114161	1.16861
POS	POS_584.557_5.7301	584.557	5.7301	DG O-17:0_16:1	97.3	C36H70O4	EtherDG	Ether-linked diacylglycerol				FAHFA(18:0/9-O-18:0);FAHFA(18:0/12-O-18:0);FAHFA(18:0/5-O-18:0);FAHFA(18:0/7-O-18:0);FAHFA(18:0/8-O-18:0);FAHFA(18:0/10-O-18:0);FAHFA(18:0/11-O-18:0);FAHFA(18:0/13-O-18:0);FAHFA(18:0/6-O-18:0)	35347.8	31792.1	39101.3	30245.8	39654.5	32360.6	18559	20296.6	18036.7	22021.8	9763.64	23397.5	26714.8	34750.3	18679.2	1.8604	up	0.00279888	0.0126931	1.24438
POS	POS_927.732_8.1368	927.732	8.1368	MGDG O-20:2_26:2	89.04	C55H100O9	MGDG	Monogalactosyldiacylglycerol					129445	73241.2	136810	113478	115415	123454	51813.8	55441.5	66629.1	59632	56694.9	81638.1	88641	115307	61974.9	1.8605	up	0.000401924	0.00276925	1.22732
POS	POS_338.341_4.6755	338.341	4.6755	Erucamide	94.75	C22H43NO			Primary amides [FA0801]	Fatty amides [FA08]	Fatty Acyls [FA]	13-Docosenamide	2.66084e+07	2.61692e+07	1.98557e+07	1.86273e+07	1.39149e+07	1.39029e+07	8.90506e+06	1.14401e+07	1.27186e+07	1.45239e+07	6.54651e+06	9.76185e+06	1.52479e+07	1.98464e+07	1.06493e+07	1.8636	up	0.00369336	0.015747	1.16293
POS	POS_688.581_6.7767	688.581	6.7767	DG 18:1_22:4	100	C43H74O5	DG	Diacylglycerol				"DG(18:0/22:5(4Z,7Z,10Z,13Z,16Z)/0:0);DG(18:0/22:5(7Z,10Z,13Z,16Z,19Z)/0:0);DG(18:1(11Z)/22:4(7Z,10Z,13Z,16Z)/0:0);DG(18:1(9Z)/22:4(7Z,10Z,13Z,16Z)/0:0);DG(18:3(6Z,9Z,12Z)/22:2(13Z,16Z)/0:0);DG(18:3(9Z,12Z,15Z)/22:2(13Z,16Z)/0:0);DG(18:4(6Z,9Z,12Z,15Z)/22:1(13Z)/0:0);DG(20:0/20:5(5Z,8Z,11Z,14Z,17Z)/0:0);DG(20:1(11Z)/20:4(5Z,8Z,11Z,14Z)/0:0);DG(20:1(11Z)/20:4(8Z,11Z,14Z,17Z)/0:0);DG(20:2(11Z,14Z)/…	28867	16537.3	25075.3	23022.5	21268.9	20894.3	11187.7	10781.4	12121.1	11578.5	17611.4	9382.42	17360.6	22610.9	12110.4	1.8671	up	0.000298544	0.00218777	1.24452
POS	POS_482.367_2.2981	482.367	2.2981	PC(O-16:0/0:0)	85.84	C24H53N1O6P1	PC	Phosphatidylcholine				sphingosylphosphorylcholine	1306.64	1247	2014.33	522.719	1720.76	1226.64	788.975	824.351	355.636	666.928	408.774	1257.93	1028.39	1339.68	717.1	1.8682	up	0.0405556	0.101681	1.04073
POS	POS_844.612_5.9976	844.612	5.9976	LPC 42:8-SN1	75.21	C50H86NO7P	LPC	Lysophophatidylcholine	Monoacylglycerophosphocholines [GP0105]	Glycerophosphocholines [GP01]	Glycerophospholipids [GP]	"PS(16:1(9Z)/24:1(15Z));PS(18:0/22:2(13Z,16Z));PS(18:1(11Z)/22:1(13Z));PS(18:1(9Z)/22:1(13Z));PS(18:2(9Z,12Z)/22:0);PS(20:0/20:2(11Z,14Z));PS(20:1(11Z)/20:1(11Z));PS(20:2(11Z,14Z)/20:0);PS(22:0/18:2(9Z,12Z));PS(22:1(13Z)/18:1(11Z));PS(22:1(13Z)/18:1(9Z));PS(22:2(13Z,16Z)/18:0);PS(24:1(15Z)/16:1(9Z));PC(18:0/20:3(8Z,11Z,14Z)-2OH(5,6));PC(20:3(8Z,11Z,14Z)-2OH(5,6)/18:0);PC(20:2(11Z,14Z)/18:1(12Z)-2…	20441.7	15671.5	22240.3	17511.7	35072.5	19957.6	12814	13976.7	14265.1	14595.5	5828.36	8563.25	16744.8	21815.9	11673.8	1.8688	up	0.00783777	0.0283377	1.15562
NEG	NEG_716.521_6.3521	716.521	6.3521	PE 16:0_18:1	100	C39H76NO8P	PE	Phosphatidylethanolamine				"PC(15:0/16:1(9Z));PC(16:1(9Z)/15:0);PE(14:0/20:1(11Z));PE(14:1(9Z)/20:0);PE(16:0/18:1(11Z));PE(16:0/18:1(9Z));PE(16:1(9Z)/18:0);PE(18:0/16:1(9Z));PE(18:1(11Z)/16:0);PE(18:1(9Z)/16:0);PE(20:0/14:1(9Z));PE(20:1(11Z)/14:0);PE-NMe(15:0/18:1(9Z));PE-NMe(15:0/18:1(11Z));PE-NMe(18:1(11Z)/15:0);PE-NMe(18:1(9Z)/15:0);PE-NMe2(16:0/16:1(9Z));PE-NMe2(14:0/18:1(9Z));PE-NMe2(14:0/18:1(11Z));PE-NMe2(14:1(9Z)/1…	10135.8	9025.9	10666.1	10323.5	8661.38	12266.7	5501.23	4947.4	6186.44	5473.01	6079.78	4433.93	7808.43	10179.9	5436.96	1.8724	up	5.80139e-06	0.000103804	1.29397
NEG	NEG_436.281_2.7105	436.281	2.7105	LPE O-16:1	100	C21H44NO6P	EtherLPE	Ether-linked lysophosphatidylethanolamine				LysoPE(P-16:0/0:0);3-hydroxypentadecanoyl carnitine;10-Hydroxypentadecanoylcarnitine;7-Hydroxypentadecanoylcarnitine;9-Hydroxypentadecanoylcarnitine;6-Hydroxypentadecanoylcarnitine;5-Hydroxypentadecanoylcarnitine;Anisperimus	30535.9	24704.9	27477.3	30956	25701.9	33196.6	17200.6	15566.8	14230.1	17264.6	14939.6	12945.1	22059.9	28762.1	15357.8	1.8728	up	2.46796e-06	5.50661e-05	1.30022
POS	POS_755.557_4.4618	755.557	4.4618	DG 45:9	100	C48H76O5	DG	Diacylglycerol				"PA(18:1(11Z)/22:2(13Z,16Z));PA(18:1(9Z)/22:2(13Z,16Z));PA(18:2(9Z,12Z)/22:1(13Z));PA(18:3(6Z,9Z,12Z)/22:0);PA(18:3(9Z,12Z,15Z)/22:0);PA(20:0/20:3(5Z,8Z,11Z));PA(20:3(5Z,8Z,11Z)/20:0);PA(22:0/18:3(6Z,9Z,12Z));PA(22:0/18:3(9Z,12Z,15Z));PA(22:1(13Z)/18:2(9Z,12Z));PA(22:2(13Z,16Z)/18:1(11Z));PA(22:2(13Z,16Z)/18:1(9Z));PA(20:0/20:3(8Z,11Z,14Z));PA(20:1(11Z)/20:2(11Z,14Z));PA(20:2(11Z,14Z)/20:1(11Z));…	15395.5	12241.6	13380.6	16205.1	18535.9	14716.3	826.88	752.844	364.297	381.696	44859.4	922.333	11548.5	15079.2	8017.9	1.8807	up	0.0194315	0.0571074	2.28904
POS	POS_558.504_6.5503	558.504	6.5503	DG 14:0_16:0	100	C33H64O5	DG	Diacylglycerol					23232.1	19731.9	21231.7	20441.3	25657.7	26118.2	14496.4	10406.3	10237	9524.21	13363	14495.6	17411.3	22735.5	12087.1	1.881	up	9.11185e-05	0.000868336	1.28861
POS	POS_856.702_7.7583	856.702	7.7583	PC(24:1(15Z)/P-18:0)	75.26	C50H98NO7P	PC	Phosphatidylcholine	Diacylglycerophosphocholines [GP0101]	Glycerophosphocholines [GP01]	Glycerophospholipids [GP]	Isofucosterol 3-O-[6-O-(9-Octadecenoyl)-b-D-glucopyranoside];Sitosterol 3-O-(6'-O-linoleyl-beta-D-glucoside)	31177.2	46584.4	30089.5	35367.1	69645.4	43429.4	18721	18955.3	24574	18937.5	39140.8	15613.7	32686.3	42715.5	22657	1.8853	up	0.00611757	0.0234585	1.16434
POS	POS_857.702_7.4219	857.702	7.4219	SM 30:1;2O(FA 14:0)	74.72	C49H97N2O7P	SM	Sphingomyelin	Ceramide phosphocholines (sphingomyelins) [SP0301]	Phosphosphingolipids [SP03]	Sphingolipids [SP]	3-(Acetyloxy)-2-hydroxypropyl icosanoate;DG(8:0/14:0/0:0);DG(8:0/0:0/14:0);DG(8:0/i-14:0/0:0);DG(8:0/0:0/i-14:0);DG(10:0/12:0/0:0);DG(10:0/0:0/12:0);DG(10:0/i-12:0/0:0);DG(10:0/0:0/i-12:0);DG(12:0/10:0/0:0);DG(12:0/0:0/10:0);DG(i-12:0/10:0/0:0);DG(i-12:0/0:0/10:0);DG(14:0/8:0/0:0);DG(14:0/0:0/8:0);DG(i-14:0/8:0/0:0);DG(i-14:0/0:0/8:0);TG(15:0/18:1(9Z)/16:0);TG(15:0/20:0/14:1(9Z));TG(15:0/20:1(11Z…	64063	77786.9	61131.9	74540.4	69899	84342	41315.4	35500.7	29287.5	39225.1	56187.4	27311.5	55049.2	71960.5	38137.9	1.8869	up	0.000778096	0.00462275	1.28068
POS	POS_1198.02_7.4822	1198.02	7.4822	SM 69:6;O2	75.4	C74H137N2O7P	ASM	Acylsphingomyelin					4594.17	3388.99	4529.2	5109.36	5804.24	3880.47	2197.76	2523.42	2215.14	2143.08	1490.41	3890.25	3480.54	4551.07	2410.01	1.8884	up	0.00194174	0.00953116	1.23999
POS	POS_669.551_8.4563	669.551	8.4563	DG 38:3	100	C41H74O5	DG	Diacylglycerol				"DG(18:0/22:6(4Z,7Z,10Z,13Z,16Z,19Z)/0:0);DG(18:1(11Z)/22:5(4Z,7Z,10Z,13Z,16Z)/0:0);DG(18:1(11Z)/22:5(7Z,10Z,13Z,16Z,19Z)/0:0);DG(18:1(9Z)/22:5(4Z,7Z,10Z,13Z,16Z)/0:0);DG(18:1(9Z)/22:5(7Z,10Z,13Z,16Z,19Z)/0:0);DG(18:2(9Z,12Z)/22:4(7Z,10Z,13Z,16Z)/0:0);DG(18:4(6Z,9Z,12Z,15Z)/22:2(13Z,16Z)/0:0);DG(20:1(11Z)/20:5(5Z,8Z,11Z,14Z,17Z)/0:0);DG(20:2(11Z,14Z)/20:4(5Z,8Z,11Z,14Z)/0:0);DG(20:2(11Z,14Z)/20:4…	4157.4	2836.12	5125.43	4447.26	4794.97	5900.4	1686.01	2407.19	2537.02	1991.82	2238.6	3534.45	3471.39	4543.6	2399.18	1.8938	up	0.00125248	0.00673297	1.21837
POS	POS_715.539_7.4995	715.539	7.4995	DG 42:8	100	C45H72O5	DG	Diacylglycerol				"Leu-Leu-Leu;Pentolame;(5alpha)-23-Methyl-4-aza-21-norchol-1-ene-3,20-dione;SM(d16:1/18:1(12Z)-O(9S,10R));SM(d16:1/18:1(9Z)-O(12,13));CE(MonoMe(11,3));CE(MonoMe(9,5));CE(10D3);CE(11D2);CE(7D6);CE(8D5);CE(9D4);PE(18:3(6Z,9Z,12Z)/P-16:0);PE(18:3(9Z,12Z,15Z)/P-16:0);PE(P-16:0/18:3(6Z,9Z,12Z));PE(P-16:0/18:3(9Z,12Z,15Z))"	5901.1	6373.04	8661.63	8526.49	7594.55	8337.75	4650.22	3952.68	3285.35	4142.35	2174.67	5631.14	5769.25	7565.76	3972.73	1.9044	up	0.00244091	0.0114193	1.25486
POS	POS_570.505_5.5614	570.505	5.5614	Cer 18:1;O3/16:0(2OH)	100	C34H67NO5	Cer_AP	Ceramide alpha-hydroxy fatty acid-phytospingosine				DG(15:0/16:1(9Z)/0:0);DG(16:1(9Z)/15:0/0:0);DG(15:0/0:0/16:1n7)	1464.65	1269.6	1258.41	1758.87	1376.38	2377.03	788.726	384.868	924.765	789.122	1344.3	742.671	1206.62	1584.16	829.075	1.9108	up	0.00738102	0.0270944	1.20745
POS	POS_1183.04_9.032	1183.04	9.032	TG 18:0_18:0_18:2;O(FA 18:2)	100	C75H136O8	TG_EST	Triacylglycerol estolides					11057	10742.5	10724.7	10896.1	15346.7	11257.8	2679.09	4984.83	6373.55	6651.83	8034.08	7918.32	8888.88	11670.8	6106.95	1.9111	up	0.00731779	0.0269042	1.24481
POS	POS_594.373_2.4001	594.373	2.4001	PC(16:0/5:0(CHO))	85.35	C29H57N1O9P1	PC	Phosphatidylcholine	Diacylglycerophosphocholines [GP0101]	Glycerophosphocholines [GP01]	Glycerophospholipids [GP]	"Povpc;PA(8:0/18:1(12Z)-O(9S,10R));PA(18:1(12Z)-O(9S,10R)/8:0);PA(8:0/18:1(9Z)-O(12,13));PA(18:1(9Z)-O(12,13)/8:0)"	74959	128845	135027	51098.7	142549	83229.6	25723.1	33793.9	45894	38639.4	46115.2	131519	78116.1	102618	53614.1	1.914	up	0.0277899	0.0755092	1.15685
POS	POS_796.616_6.4538	796.616	6.4538	"PC(20:3(5Z,8Z,11Z)/P-18:0)"	72.42	C46H86NO7P	PC	Phosphatidylcholine	Diacylglycerophosphocholines [GP0101]	Glycerophosphocholines [GP01]	Glycerophospholipids [GP]	"PC(20:2(11Z,14Z)/P-18:1(11Z));PC(20:2(11Z,14Z)/P-18:1(9Z));PC(20:3(5Z,8Z,11Z)/P-18:0);PC(20:3(8Z,11Z,14Z)/P-18:0);PC(P-18:0/20:3(5Z,8Z,11Z));PC(P-18:0/20:3(8Z,11Z,14Z));PC(P-18:1(11Z)/20:2(11Z,14Z));PC(P-18:1(9Z)/20:2(11Z,14Z));PC(O-18:0/20:4(8Z,11Z,14Z,17Z));PC(18:0/P-18:0);PC(20:0/P-16:0);PC(P-16:0/20:0);PC(P-18:0/18:0);PC(O-16:1(9Z)/20:0);PC(O-18:1(9Z)/18:0)"	8.95525e+06	1.03288e+07	9.52108e+06	9.63562e+06	7.5246e+06	9.2245e+06	5.17988e+06	5.11348e+06	5.22347e+06	5.0382e+06	3.98455e+06	4.28327e+06	7.00106e+06	9.19831e+06	4.80381e+06	1.9148	up	1.52107e-06	3.8214e-05	1.32753
POS	POS_702.61_8.3991	702.61	8.3991	SE 28:2/20:4	71.1	C48H76O2	SE					arachidyl amido cholanoic acid;Cer(d18:1/25:0)	65126.3	63303.7	73195.8	71945.9	77164.2	77807.8	24523.8	38783.1	40814	39582.3	34929.9	44641.2	54318.2	71423.9	37212.4	1.9194	up	0.000242076	0.00184814	1.31533
POS	POS_958.778_7.9685	958.778	7.9685	TG 21:2_17:3_21:5	100	C62H100O6	TG	Triacylglycerol				"TG(15:0/22:4(7Z,10Z,13Z,16Z)/22:6(4Z,7Z,10Z,13Z,16Z,19Z));TG(15:0/22:5(4Z,7Z,10Z,13Z,16Z)/22:5(4Z,7Z,10Z,13Z,16Z));TG(15:0/22:5(4Z,7Z,10Z,13Z,16Z)/22:5(7Z,10Z,13Z,16Z,19Z));TG(15:0/22:5(7Z,10Z,13Z,16Z,19Z)/22:5(4Z,7Z,10Z,13Z,16Z));TG(15:0/22:5(7Z,10Z,13Z,16Z,19Z)/22:5(7Z,10Z,13Z,16Z,19Z));TG(15:0/22:6(4Z,7Z,10Z,13Z,16Z,19Z)/22:4(7Z,10Z,13Z,16Z));TG(22:4(7Z,10Z,13Z,16Z)/15:0/22:6(4Z,7Z,10Z,13Z,16…	23352.1	31056.5	23096.3	24364.6	51112.5	26248	12146.6	14978.1	16223.1	16539	16733.2	16540.4	22699.2	29871.6	15526.7	1.9239	up	0.00288965	0.0130115	1.20184
POS	POS_748.58_6.3434	748.58	6.3434	PC(18:0/15:0)	78.54	C41H82NO8P	PC	Phosphatidylcholine	Diacylglycerophosphocholines [GP0101]	Glycerophosphocholines [GP01]	Glycerophospholipids [GP]	"PC(15:0/18:0);PC(18:0/15:0);PE(14:0/22:0);PE(16:0/20:0);PE(18:0/18:0);PE(20:0/16:0);PE(22:0/14:0);Phosphatidylethanolamine;PE-NMe(15:0/20:0);PE-NMe(20:0/15:0);PE-NMe2(16:0/18:0);PE-NMe2(14:0/20:0);PE-NMe2(18:0/16:0);PE-NMe2(20:0/14:0);1,2-Distearoylphosphatidylethanolamine;PA(14:0/24:1(15Z));PA(14:1(9Z)/24:0);PA(16:0/22:1(13Z));PA(16:1(9Z)/22:0);PA(18:0/20:1(11Z));PA(18:1(11Z)/20:0);PA(18:1(9Z)/…	64536.8	59029	72023.7	71707	70876.3	77584.4	28232	36641.6	35195.1	36676.9	32424	45730.9	52554.8	69292.9	35816.7	1.9346	up	1.87185e-05	0.000257189	1.33469
POS	POS_832.731_8.1195	832.731	8.1195	TG 13:0_17:1_19:2	100	C52H94O6	TG	Triacylglycerol				"SM(d18:1/24:0);SM(d18:0/24:1(15Z));TG(14:0/15:0/20:3(5Z,8Z,11Z));TG(14:0/15:0/20:3n6);TG(14:0/20:3(5Z,8Z,11Z)/15:0);TG(14:0/20:3n6/15:0);TG(15:0/14:0/20:3(5Z,8Z,11Z));TG(15:0/14:0/20:3n6);TG(15:0/16:0/18:3(6Z,9Z,12Z));TG(15:0/16:0/18:3(9Z,12Z,15Z));TG(15:0/14:1(9Z)/20:2n6);TG(15:0/16:1(9Z)/18:2(9Z,12Z));TG(15:0/18:2(9Z,12Z)/16:1(9Z));TG(15:0/18:3(6Z,9Z,12Z)/16:0);TG(15:0/20:2n6/14:1(9Z));TG(15:0…	251479	380927	271643	277606	348404	286627	117853	130731	170457	147707	188386	183734	229630	302781	156478	1.935	up	7.6596e-05	0.000764398	1.30349
POS	POS_796.619_6.45	796.619	6.45	"PC(P-18:0/20:3(8Z,11Z,14Z))"	90.56	C46H86NO7P	PC	Phosphatidylcholine	"1Z-alkenyl,2-acylglycerophosphocholines [GP0103]"	Glycerophosphocholines [GP01]	Glycerophospholipids [GP]	"PC(20:2(11Z,14Z)/P-18:1(11Z));PC(20:2(11Z,14Z)/P-18:1(9Z));PC(20:3(5Z,8Z,11Z)/P-18:0);PC(20:3(8Z,11Z,14Z)/P-18:0);PC(P-18:0/20:3(5Z,8Z,11Z));PC(P-18:0/20:3(8Z,11Z,14Z));PC(P-18:1(11Z)/20:2(11Z,14Z));PC(P-18:1(9Z)/20:2(11Z,14Z));PC(O-18:0/20:4(8Z,11Z,14Z,17Z));PC(18:0/P-18:0);PC(20:0/P-16:0);PC(P-16:0/20:0);PC(P-18:0/18:0);PC(O-16:1(9Z)/20:0);PC(O-18:1(9Z)/18:0)"	8.99535e+06	1.00888e+07	9.42116e+06	9.66489e+06	7.69279e+06	9.31526e+06	5.12459e+06	5.07661e+06	5.1665e+06	4.96558e+06	3.95615e+06	4.21479e+06	6.97354e+06	9.19637e+06	4.7507e+06	1.9358	up	1.02201e-06	2.85843e-05	1.34401
POS	POS_354.335_2.0842	354.335	2.0842	NAE 20:1	100	C22H43NO2	NAE	N-acyl ethanolamines	N-acyl ethanolamides (endocannabinoids) [FA0804]	Fatty amides [FA08]	Fatty Acyls [FA]	"Docosadienoate (22:2n6);13,16-Docosadienoic acid;Docosadienoic acid;5Z,13Z-Docosadienoic acid"	21886.1	14557.3	23519.6	23546.4	28958.3	22316.2	12590	11301.6	11858.3	9143.34	12241.5	12435.5	17029.5	22464	11595	1.9374	up	0.000319589	0.00230166	1.27932
NEG	NEG_505.497_7.8507	505.497	7.8507	FA 34:1	100	C34H66O2	FA	Fatty acyls					1557.28	1496.22	1755.05	1925.22	1219.35	1813.83	854.079	904.061	800.818	892.457	881.397	707.292	1233.92	1627.82	840.017	1.9378	up	3.29734e-05	0.000392355	1.31892
POS	POS_836.61_6.1665	836.61	6.1665	"PC(20:5(5Z,8Z,11Z,14Z,17Z)/20:0)"	96.99	C48H86NO8P	PC	Phosphatidylcholine	Diacylglycerophosphocholines [GP0101]	Glycerophosphocholines [GP01]	Glycerophospholipids [GP]	"PC(18:0/22:5(4Z,7Z,10Z,13Z,16Z));PC(18:0/22:5(7Z,10Z,13Z,16Z,19Z));PC(18:1(11Z)/22:4(7Z,10Z,13Z,16Z));PC(18:1(9Z)/22:4(7Z,10Z,13Z,16Z));PC(18:3(6Z,9Z,12Z)/22:2(13Z,16Z));PC(18:3(9Z,12Z,15Z)/22:2(13Z,16Z));PC(18:4(6Z,9Z,12Z,15Z)/22:1(13Z));PC(20:0/20:5(5Z,8Z,11Z,14Z,17Z));PC(20:1(11Z)/20:4(5Z,8Z,11Z,14Z));PC(20:1(11Z)/20:4(8Z,11Z,14Z,17Z));PC(20:2(11Z,14Z)/20:3(5Z,8Z,11Z));PC(20:2(11Z,14Z)/20:3(8…	4.15713e+06	4.4628e+06	1.19534e+07	7.32356e+06	9.68078e+06	1.17744e+07	4.31725e+06	4.34236e+06	4.12812e+06	4.28338e+06	4.45745e+06	3.91536e+06	6.233e+06	8.22535e+06	4.24065e+06	1.9396	up	0.0294961	0.0791909	1.06222
POS	POS_832.577_6.1604	832.577	6.1604	"PC(P-18:1(9Z)/22:5(4Z,7Z,10Z,13Z,19Z)-O(16,17))"	97.88	C48H82NO8P	PC	Phosphatidylcholine	Diacylglycerophosphocholines [GP0101]	Glycerophosphocholines [GP01]	Glycerophospholipids [GP]	"PC(18:1(11Z)/22:6(4Z,7Z,10Z,13Z,16Z,19Z));PC(18:1(9Z)/22:6(4Z,7Z,10Z,13Z,16Z,19Z));PC(18:2(9Z,12Z)/22:5(4Z,7Z,10Z,13Z,16Z));PC(18:2(9Z,12Z)/22:5(7Z,10Z,13Z,16Z,19Z));PC(18:3(6Z,9Z,12Z)/22:4(7Z,10Z,13Z,16Z));PC(18:3(9Z,12Z,15Z)/22:4(7Z,10Z,13Z,16Z));PC(20:2(11Z,14Z)/20:5(5Z,8Z,11Z,14Z,17Z));PC(20:3(5Z,8Z,11Z)/20:4(5Z,8Z,11Z,14Z));PC(20:3(5Z,8Z,11Z)/20:4(8Z,11Z,14Z,17Z));PC(20:3(8Z,11Z,14Z)/20:4(5…	140507	103165	206543	144945	201490	154388	79718.8	83397.9	92334.6	84168.4	56875.2	92861.5	120033	158506	81559.4	1.9434	up	0.000683278	0.00417716	1.25357
POS	POS_737.572_6.1795	737.572	6.1795	SM 18:3;2O/19:2	80.93	C42H77N2O6P	SM	Sphingomyelin	Ceramide phosphocholines (sphingomyelins) [SP0301]	Phosphosphingolipids [SP03]	Sphingolipids [SP]	"DG(22:0/20:4(6E,8Z,11Z,14Z)+=O(5)/0:0);DG(20:4(6E,8Z,11Z,14Z)+=O(5)/22:0/0:0);DG(22:0/0:0/20:4(6E,8Z,11Z,14Z)+=O(5));DG(20:4(6E,8Z,11Z,14Z)+=O(5)/0:0/22:0);DG(22:0/20:4(5Z,8Z,11Z,13E)+=O(15)/0:0);DG(20:4(5Z,8Z,11Z,13E)+=O(15)/22:0/0:0);DG(22:0/0:0/20:4(5Z,8Z,11Z,13E)+=O(15));DG(20:4(5Z,8Z,11Z,13E)+=O(15)/0:0/22:0);DG(22:0/20:5(5Z,8Z,11Z,14Z,16E)-OH(18R)/0:0);DG(20:5(5Z,8Z,11Z,14Z,16E)-OH(18R)/22…	38787	48017.2	44404.1	38846	76733.9	33912.8	25236.8	22508.9	23448.6	22231.9	19880.2	31054.6	35421.9	46783.5	24060.2	1.9444	up	0.00156892	0.00805003	1.22934
NEG	NEG_498.288_0.991	498.288	0.991	BA 24:1;O3;T	89.7	C26H45NO6S	BileAcid	Cholic acid	Taurine conjugates [ST0504]	Steroid conjugates [ST05]	Sterols [ST]	Tauroursodeoxycholic acid;Taurodeoxycholic acid;Chenodeoxycholyltaurine;Beloranib;LysoPE(0:0/16:0);LysoPE(16:0/0:0);Sambutoxin;[3-[2-Aminoethoxy(hydroxy)phosphoryl]oxy-2-hydroxypropyl] hexadecanoate;LysoPE(0:0/15:0);LysoPE(15:0/0:0);Dodecanoyl-sn-glycero-3-phosphocholine (isomer 1) (LPC(12:0) i1) &#8224; &#8225;;Dodecanoyl-sn-glycero-3-phosphocholine	1215.74	974.81	1367.2	1594.39	814.471	1446.35	596.425	661.084	738.842	797.238	494.175	511.71	934.37	1235.49	633.246	1.951	up	0.000639216	0.00397187	1.2579
POS	POS_1034.98_4.6655	1034.98	4.6655	Cer 22:1;O2/47:4;O2	79.5	C69H129NO5	Cer_EOS	Ceramide Esterified omega-hydroxy fatty acid-sphingosine					24199.5	26415	18969.3	16548.8	23303	9299.75	8460.94	10986	12190.2	13537.1	4476.84	11176.2	14963.6	19789.2	10137.9	1.952	up	0.0143561	0.0452536	1.14624
POS	POS_810.743_8.4831	810.743	8.4831	TG 15:0_16:0_16:0	100	C50H96O6	TG	Triacylglycerol					85435.9	43289.3	103758	55725.6	114325	59726.4	35694.4	34165.5	40823.6	35319.6	51674.4	38984	58243.4	77043.2	39443.6	1.9533	up	0.00887794	0.0312021	1.15523
POS	POS_644.449_5.0766	644.449	5.0766	MGDG 9:0_16:3	100	C34H58O10	MGDG	Monogalactosyldiacylglycerol					4248.48	5532.96	4630.56	4725.91	3638.21	5338.29	2571.27	2849.19	2721.22	2809.51	996.916	2412.1	3539.55	4685.74	2393.37	1.9578	up	0.00590878	0.0228107	1.26925
POS	POS_860.609_6.4702	860.609	6.4702	PC 18:3_24:4	77.39	C50H86NO8P	PC	Phosphatidylcholine	Diacylglycerophosphocholines [GP0101]	Glycerophosphocholines [GP01]	Glycerophospholipids [GP]	"PC(20:1(11Z)/22:6(4Z,7Z,10Z,13Z,16Z,19Z));PC(20:2(11Z,14Z)/22:5(4Z,7Z,10Z,13Z,16Z));PC(20:2(11Z,14Z)/22:5(7Z,10Z,13Z,16Z,19Z));PC(20:3(5Z,8Z,11Z)/22:4(7Z,10Z,13Z,16Z));PC(20:3(8Z,11Z,14Z)/22:4(7Z,10Z,13Z,16Z));PC(20:5(5Z,8Z,11Z,14Z,17Z)/22:2(13Z,16Z));PC(22:2(13Z,16Z)/20:5(5Z,8Z,11Z,14Z,17Z));PC(22:4(7Z,10Z,13Z,16Z)/20:3(5Z,8Z,11Z));PC(22:4(7Z,10Z,13Z,16Z)/20:3(8Z,11Z,14Z));PC(22:5(4Z,7Z,10Z,13Z…	45428.6	31173.1	58711.3	48683.6	63842.8	48995.2	23359.8	24353.8	24908.9	23821.5	17217.2	37551.9	37337.3	49472.4	25202.2	1.963	up	0.000840752	0.00491725	1.26484
POS	POS_732.604_6.2543	732.604	6.2543	PC(P-18:0/15:0)	98.97	C41H82NO7P	PC	Phosphatidylcholine	"1Z-alkenyl,2-acylglycerophosphocholines [GP0103]"	Glycerophosphocholines [GP01]	Glycerophospholipids [GP]		1.36815e+06	1.54496e+06	1.45613e+06	1.38587e+06	1.45419e+06	1.38963e+06	765014	770161	795967	799275	661832	586356	1.08146e+06	1.43315e+06	729768	1.9639	up	1.09373e-05	0.000170108	1.36871
POS	POS_950.807_8.3147	950.807	8.3147	"TG(18:2(9Z,12Z)/18:1(9Z)/22:4(7Z,10Z,13Z,16Z))"	73.44	C61H104O6	TG	Triacylglycerol	Triacylglycerols [GL0301]	Triradylglycerols [GL03]	Glycerolipids [GL]	Triricinolein;Castor oil	1.86392e+06	2.29643e+06	2.00566e+06	2.1165e+06	1.9039e+06	2.15148e+06	825917	1.02962e+06	1.08531e+06	1.06911e+06	1.26449e+06	1.00115e+06	1.55112e+06	2.05631e+06	1.04593e+06	1.966	up	6.2029e-06	0.000109851	1.36175
POS	POS_870.807_9.0078	870.807	9.0078	SE 28:1/32:5	100	C60H100O2	CASE	Campesterol ester					18621.8	21498.3	18705.2	17600	22537.1	21891.2	6088.11	9438.28	10419.4	11423.2	13344.5	10756.4	15193.6	20142.3	10245	1.9661	up	0.000752561	0.00450512	1.32497
POS	POS_256.262_3.086	256.262	3.086	Hexadecanamide	74.99	C16H33NO			Primary amides [FA0801]	Fatty amides [FA08]	Fatty Acyls [FA]	"Palmitic amide;3-Methylcyclopentadecanone;(&#177;)-2-Dodecylcyclobutanone;Hexadecenal;(Z)-11-Hexadecenal;Hexadec-2-enal;9-Hexadecenal, (9Z)-"	109074	183209	155554	159789	190411	129984	132728	127952	88398.3	41960.7	42456.5	38383.9	116658	154670	78646.6	1.9666	up	0.01854	0.0551632	1.26459
POS	POS_1159.04_9.1446	1159.04	9.1446	TG 16:0_18:1_18:1;O(FA 18:0)	100	C73H136O8	TG_EST	Triacylglycerol estolides					10217.4	11416.6	11190	11808.1	16641.1	10757.4	1883.96	5617.64	6791.69	6828.11	8191.84	7144.7	9040.71	12005.1	6076.32	1.9757	up	0.0168172	0.0512422	1.24684
POS	POS_912.758_7.8691	912.758	7.8691	TG 18:1_22:4_14:1;O	97.2	C57H98O7	OxTG	Oxidized triglyceride					119215	182872	109107	144160	140634	140504	73533.8	71108.7	88341.6	36679.5	112830	40875.2	104988	139415	70561.5	1.9758	up	0.00708472	0.0262125	1.2843
POS	POS_696.656_9.0694	696.656	9.0694	SE 29:1/18:1	100	C47H82O2	SISE	Sitosterol ester				DG(16:0/24:1(15Z)/0:0);DG(16:1(9Z)/24:0/0:0);DG(18:0/22:1(13Z)/0:0);DG(18:1(11Z)/22:0/0:0);DG(18:1(9Z)/22:0/0:0);DG(20:0/20:1(11Z)/0:0);DG(20:1(11Z)/20:0/0:0);DG(22:0/18:1(11Z)/0:0);DG(22:0/18:1(9Z)/0:0);DG(22:1(13Z)/18:0/0:0);DG(24:0/16:1(9Z)/0:0);DG(24:1(15Z)/16:0/0:0);DG(16:0/0:0/24:1n9);DG(18:0/0:0/22:1n9);DG(20:0/0:0/20:1n9);DG(22:0/0:0/18:1n7);DG(22:0/0:0/18:1n9);DG(24:0/0:0/16:1n7)	96365.1	96630.4	88778.1	89628.9	125336	93587.8	35659.7	50639.7	39830.4	53292.9	60397	58417.6	74047	98387.8	49706.2	1.9794	up	0.000118574	0.00106211	1.33804
POS	POS_739.509_5.3867	739.509	5.3867	DG 44:10	97.9	C47H72O5	DG	Diacylglycerol				"3-Hydroxytrideca-4,6-dienoylcarnitine;3-Hydroxytrideca-6,9-dienoylcarnitine;(5E,9E)-3-Hydroxytrideca-5,9-dienoylcarnitine;5-Hydroxytrideca-7,9-dienoylcarnitine;5-Hydroxytrideca-8,11-dienoylcarnitine;4-Hydroxytrideca-6,8-dienoylcarnitine;3-Hydroxytrideca-5,8-dienoylcarnitine;3-Hydroxytrideca-5,7-dienoylcarnitine;6-Hydroxytrideca-8,10-dienoylcarnitine;4-Hydroxytrideca-7,10-dienoylcarnitine;7-Hydro…	21448	12481.4	23740.5	24238.7	20650.8	28236.8	8896.2	9337.19	6057.39	8729.68	10650.3	22375	16403.5	21799.4	11007.6	1.9804	up	0.00706188	0.0261674	1.25189
POS	POS_762.587_6.1947	762.587	6.1947	"1,2-Diheptadecanoyl-sn-glycero-3-phosphocholine"	86.04	C42H84NO8P			Diacylglycerophosphocholines [GP0101]	Glycerophosphocholines [GP01]	Glycerophospholipids [GP]		3.14725e+06	3.42341e+06	3.23701e+06	3.05509e+06	2.19558e+06	3.17292e+06	1.48233e+06	1.5528e+06	1.59257e+06	1.53469e+06	1.66081e+06	1.37654e+06	2.28592e+06	3.03854e+06	1.53329e+06	1.9817	up	3.94306e-05	0.000450697	1.35102
NEG	NEG_909.548_5.6569	909.548	5.6569	PI(18:0/22:6)	70.47	C49H82O13P1	PI	Sphingolipids	Diacylglycerophosphoinositols [GP0601]	Glycerophosphoinositols [GP06]	Glycerophospholipids [GP]	"PG(20:1(11Z)/22:6(5Z,7Z,10Z,13Z,16Z,19Z)-OH(4));PG(22:6(5Z,7Z,10Z,13Z,16Z,19Z)-OH(4)/20:1(11Z));PG(20:1(11Z)/22:6(4Z,8Z,10Z,13Z,16Z,19Z)-OH(7));PG(22:6(4Z,8Z,10Z,13Z,16Z,19Z)-OH(7)/20:1(11Z));PG(20:1(11Z)/22:6(4Z,7Z,10Z,12E,16Z,19Z)-OH(14));PG(22:6(4Z,7Z,10Z,12E,16Z,19Z)-OH(14)/20:1(11Z));PG(20:1(11Z)/22:6(4Z,7Z,10Z,13E,15E,19Z)-OH(17));PG(22:6(4Z,7Z,10Z,13E,15E,19Z)-OH(17)/20:1(11Z));PG(20:1(11…	10551.8	9555.74	11582	11542.2	9944.37	13217.7	5761.71	5981.45	5329.86	6324.11	5246.74	4730.28	8313.99	11065.6	5562.36	1.9894	up	1.02781e-06	2.86537e-05	1.36692
POS	POS_1152.1_6.8207	1152.1	6.8207	SM 66:1;O2	91.2	C71H143N2O6P	SM	Sphingomyelin					13768.7	13406.5	14254	12978.1	19841.4	10634.2	8657.44	6403.73	10401.5	7209.3	2761.46	7226.45	10628.6	14147.2	7109.98	1.9898	up	0.00869557	0.0307027	1.26543
POS	POS_796.732_8.4144	796.732	8.4144	TG 14:0_16:0_16:0	100	C49H94O6	TG	Triacylglycerol				TG(16:0/14:0/16:0);TG(14:0/14:0/18:0);TG(14:0/16:0/16:0);TG(14:0/18:0/14:0);TG(15:0/15:0/16:0);TG(15:0/16:0/15:0);TG(i-20:0/14:0/12:0);TG(20:0/14:0/12:0);TG(20:0/a-13:0/13:0);TG(20:0/i-14:0/i-12:0);TG(20:0/i-13:0/i-13:0);TG(20:0/i-12:0/i-14:0);TG(20:0/i-13:0/13:0);TG(20:0/8:0/i-18:0);TG(i-20:0/8:0/18:0);TG(20:0/12:0/i-14:0);TG(20:0/i-14:0/12:0);TG(20:0/16:0/10:0);TG(i-20:0/12:0/14:0);TG(20:0/a-13…	317217	354988	348195	331252	256058	361183	142005	152453	178969	162165	215152	135807	246287	328149	164425	1.9957	up	1.69829e-05	0.000239563	1.35859
POS	POS_962.806_8.3076	962.806	8.3076	TG 19:2_19:2_21:4	100	C62H104O6	TG	Triacylglycerol					38580.6	34811.1	43308.6	37385.3	30186.8	44162.3	17983	17148.4	21967.2	17402.5	19992.4	19839.1	28563.9	38072.4	19055.4	1.998	up	4.84303e-06	9.07919e-05	1.36354
POS	POS_531.404_5.3677	531.404	5.3677	DG 28:2	100	C31H56O5	DG	Diacylglycerol				alpha-Tocopherol succinate;DG(14:1(9Z)/14:1(9Z)/0:0);DG(14:1n5/0:0/14:1n5)	20238.5	38903.2	27136.3	21854.1	29249.1	22494.7	12152.7	13706.3	14628.5	14617	18291.5	6569.09	19986.8	26646	13327.5	1.9993	up	0.00277337	0.0126171	1.26881
POS	POS_692.551_6.0685	692.551	6.0685	PC O-30:0	83.38	C38H78NO7P	PC	Phosphatidylcholine				DG(18:0/PGJ2/0:0);DG(PGJ2/18:0/0:0);DG(18:0/0:0/PGJ2);DG(PGJ2/0:0/18:0);DG(i-18:0/PGJ2/0:0);DG(PGJ2/i-18:0/0:0);DG(i-18:0/0:0/PGJ2);DG(PGJ2/0:0/i-18:0)	49719.4	56933	47796.5	53299.2	76638.9	46936.2	28532.4	31647.9	35489.3	33256.7	15172.8	21175	41383.1	55220.5	27545.7	2.0047	up	0.00159649	0.00815129	1.3049
POS	POS_928.591_5.6623	928.591	5.6623	PI 40:6	100	C49H83O13P	PI	Sphingolipids				"PE(DiMe(13,5)/6 keto-PGF1alpha);PE(6 keto-PGF1alpha/DiMe(13,5));PE(DiMe(13,5)/TXB2);PE(TXB2/DiMe(13,5));3-O-Sulfogalactosylceramide (d18:1/24:1(15Z));PE(24:1(15Z)/22:6(5Z,7Z,10Z,13Z,16Z,19Z)-OH(4));PE(22:6(5Z,7Z,10Z,13Z,16Z,19Z)-OH(4)/24:1(15Z));PE(24:1(15Z)/22:6(4Z,8Z,10Z,13Z,16Z,19Z)-OH(7));PE(22:6(4Z,8Z,10Z,13Z,16Z,19Z)-OH(7)/24:1(15Z));PE(24:1(15Z)/22:6(4Z,7Z,10Z,12E,16Z,19Z)-OH(14));PE(22:6…	36052.1	42319	36368.6	28414.5	39015.2	38867	20833.8	21086.7	17160	15405.4	13156.3	22183.7	27571.9	36839.4	18304.3	2.0126	up	7.69727e-05	0.000767566	1.3549
POS	POS_846.629_6.7367	846.629	6.7367	PC(P-18:0/PGF1alpha)	76.89	C46H88NO10P	PC	Phosphatidylcholine	Diacylglycerophosphocholines [GP0101]	Glycerophosphocholines [GP01]	Glycerophospholipids [GP]	"PS(16:0/24:1(15Z));PS(16:1(9Z)/24:0);PS(18:0/22:1(13Z));PS(18:1(11Z)/22:0);PS(18:1(9Z)/22:0);PS(20:0/20:1(11Z));PS(20:1(11Z)/20:0);PS(22:0/18:1(11Z));PS(22:0/18:1(9Z));PS(22:1(13Z)/18:0);PS(24:0/16:1(9Z));PS(24:1(15Z)/16:0);PC(20:1(11Z)/18:1(12Z)-2OH(9,10));PC(18:1(12Z)-2OH(9,10)/20:1(11Z));PC(P-18:0/PGF1alpha);PC(PGF1alpha/P-18:0);PC(22:2(13Z,16Z)/P-18:1(11Z));PC(22:2(13Z,16Z)/P-18:1(9Z));PC(P-…	33640.5	32712.9	40944.5	37499	52318.1	36554	20245.5	20605.2	23047.6	23200.7	8469.46	19268.1	29042.1	38944.8	19139.4	2.0348	up	0.00333779	0.0145395	1.31479
POS	POS_681.467_5.4852	681.467	5.4852	DG 40:11	95.5	C43H62O5	DG	Diacylglycerol				"PG(a-13:0/i-16:0);PG(i-12:0/a-17:0);PG(i-12:0/i-17:0);PG(i-13:0/i-16:0);PG(i-14:0/a-15:0);PG(i-14:0/i-15:0);DG(11M3/9D3/0:0);DG(9D3/11M3/0:0);DG(9D3/9M5/0:0);DG(9M5/9D3/0:0);DG(15:0/22:6(5Z,8E,10Z,13Z,15E,19Z)-2OH(7S, 17S)/0:0);DG(22:6(5Z,8E,10Z,13Z,15E,19Z)-2OH(7S, 17S)/15:0/0:0);DG(15:0/0:0/22:6(5Z,8E,10Z,13Z,15E,19Z)-2OH(7S, 17S));DG(22:6(5Z,8E,10Z,13Z,15E,19Z)-2OH(7S, 17S)/0:0/15:0);DG(15:0/…	18759.1	13439.9	17415.8	9323.84	11629.2	15719.2	9418.46	7029.28	5540.56	6531.62	3412.12	9983.94	10683.6	14381.2	6986	2.0586	up	0.00378366	0.0160533	1.29101
POS	POS_936.757_7.7767	936.757	7.7767	ASG 27:1;O;Hex;FA 26:4	100	C59H98O7	AHexCS	Acylhexosyl cholesterol					54974.6	49957.6	50593.7	56641.5	77377.1	59825.3	19911.7	22412.8	29683.9	25882.2	36635.7	34856.9	43229.4	58228.3	28230.5	2.0626	up	0.000184044	0.00149536	1.3661
POS	POS_1237.12_7.1968	1237.12	7.1968	PC 30:0_38:1	71.67	C76H150NO8P	PC	Phosphatidylcholine	Diacylglycerophosphocholines [GP0101]	Glycerophosphocholines [GP01]	Glycerophospholipids [GP]	Heptacarboxyporphyrin	21074.1	29925.8	23041.6	22827.4	34732.9	20919.5	13056.9	12280.4	12239	10996.2	10396	14787.3	18856.4	25420.2	12292.6	2.0679	up	8.11494e-05	0.000796954	1.36296
NEG	NEG_880.605_6.1848	880.605	6.1848	PC 40:5	74.48	C48H86NO8P	PC	Phosphatidylcholine	Diacylglycerophosphocholines [GP0101]	Glycerophosphocholines [GP01]	Glycerophospholipids [GP]	"PE(24:0/PGJ2);PE(PGJ2/24:0);PE(24:1(15Z)/20:4(6Z,8E,10E,14Z)-2OH(5S,12R));PE(20:4(6Z,8E,10E,14Z)-2OH(5S,12R)/24:1(15Z));PE(24:1(15Z)/20:4(6E,8Z,11Z,13E)-2OH(5S,15S));PE(20:4(6E,8Z,11Z,13E)-2OH(5S,15S)/24:1(15Z));PE(24:1(15Z)/20:4(8Z,11Z,14Z,17Z)-2OH(5S,6R));PE(20:4(8Z,11Z,14Z,17Z)-2OH(5S,6R)/24:1(15Z));PC(18:0/22:5(4Z,7Z,10Z,13Z,16Z));PC(18:0/22:5(7Z,10Z,13Z,16Z,19Z));PC(18:1(11Z)/22:4(7Z,10Z,13…	647022	560158	697737	632263	553036	763220	290497	316917	314163	336536	311894	289149	476049	642239	309859	2.0727	up	3.74813e-06	7.53316e-05	1.41286
POS	POS_798.634_6.6688	798.634	6.6688	PC O-38:3	81.2	C46H88NO7P	PC	Phosphatidylcholine				"PC(20:1(11Z)/P-18:1(11Z));PC(20:1(11Z)/P-18:1(9Z));PC(20:2(11Z,14Z)/P-18:0);PC(22:2(13Z,16Z)/P-16:0);PC(P-16:0/22:2(13Z,16Z));PC(P-18:0/20:2(11Z,14Z));PC(P-18:1(11Z)/20:1(11Z));PC(P-18:1(9Z)/20:1(11Z));PC(O-20:0/18:3(6Z,9Z,12Z));PC(O-20:0/18:3(9Z,12Z,15Z));PC(O-16:0/20:0);PC(O-18:0/18:0);3-Demethylubiquinone-9"	939101	996157	841176	925892	652056	690825	475869	455737	424637	414983	373385	286659	623040	840868	405212	2.0751	up	3.45059e-05	0.000405546	1.37674
POS	POS_706.59_6.0154	706.59	6.0154	LPC 31:0-SN1	81.95	C39H80NO7P	LPC	Lysophophatidylcholine	Monoacylglycerophosphocholines [GP0105]	Glycerophosphocholines [GP01]	Glycerophospholipids [GP]	SM(d18:1/15:0);SM(d16:1/17:0)	284420	357602	350651	330684	115515	320515	161071	132358	164400	172124	99104.1	116915	217113	293231	140995	2.0797	up	0.00945774	0.0327559	1.20296
NEG	NEG_772.527_6.0251	772.527	6.0251	PE O-18:2_22:6	100	C45H76NO7P	EtherPE	Ether-linked phosphatidylethanolamine				"PE(22:6(4Z,7Z,10Z,13Z,16Z,19Z)/P-18:1(11Z));PE(22:6(4Z,7Z,10Z,13Z,16Z,19Z)/P-18:1(9Z));PE(P-18:1(11Z)/22:6(4Z,7Z,10Z,13Z,16Z,19Z));PE(P-18:1(9Z)/22:6(4Z,7Z,10Z,13Z,16Z,19Z))"	12351.9	9850.59	14155.7	13109.1	11301.4	16795.6	5958.93	5936.15	6416.29	6211.1	6259.37	6410.78	9563.07	12927.4	6198.77	2.0855	up	0.000157399	0.0013241	1.39349
POS	POS_780.699_8.0939	780.699	8.0939	TG 13:0_16:0_16:1	100	C48H90O6	TG	Triacylglycerol					91593.8	142124	100424	116701	151327	105385	33444.7	49040.7	38231.1	61507.6	99166.4	57534.8	87206.7	117926	56487.5	2.0876	up	0.0026203	0.0120626	1.34945
POS	POS_792.701_8.0083	792.701	8.0083	TG 12:0_16:0_18:2	100	C49H90O6	TG	Triacylglycerol				"TG(16:1(9Z)/14:0/16:1(9Z));TG(14:0/14:0/18:2(9Z,12Z));TG(14:0/14:1(9Z)/18:1(11Z));TG(14:0/14:1(9Z)/18:1(9Z));TG(14:0/16:1(9Z)/16:1(9Z));TG(14:0/18:1(11Z)/14:1(9Z));TG(14:0/18:1(9Z)/14:1(9Z));TG(14:0/18:2(9Z,12Z)/14:0);TG(16:0/14:1(9Z)/16:1(9Z));TG(16:0/16:1(9Z)/14:1(9Z));TG(18:0/14:1(9Z)/14:1(9Z));TG(14:1(9Z)/14:0/18:1(11Z));TG(14:1(9Z)/14:0/18:1(9Z));TG(14:1(9Z)/16:0/16:1(9Z));TG(14:1(9Z)/18:0/…	927830	1.25709e+06	937270	989565	873347	1.02841e+06	392418	434081	523721	469480	684869	373439	740960	1.00225e+06	479668	2.0895	up	9.31179e-05	0.000881569	1.40016
POS	POS_786.645_6.649	786.645	6.649	PC O-37:2	95.48	C45H88NO7P	PC	Phosphatidylcholine					740731	626680	860727	771525	518449	802355	304582	203095	299634	208840	476207	575182	532334	720078	344590	2.0897	up	0.00405824	0.0169926	1.34874
POS	POS_1001.75_7.9579	1001.75	7.9579	TG 12:0_22:6_28:6	100	C65H102O6	TG	Triacylglycerol				"TG(22:5(7Z,10Z,13Z,16Z,19Z)/20:4(5Z,8Z,11Z,14Z)/22:6(4Z,7Z,10Z,13Z,16Z,19Z));TG(22:5(7Z,10Z,13Z,16Z,19Z)/20:5(5Z,8Z,11Z,14Z,17Z)/22:5(7Z,10Z,13Z,16Z,19Z));TG(20:3(5Z,8Z,11Z)/22:6(4Z,7Z,10Z,13Z,16Z,19Z)/22:6(4Z,7Z,10Z,13Z,16Z,19Z));TG(20:3n6/22:6(4Z,7Z,10Z,13Z,16Z,19Z)/22:6(4Z,7Z,10Z,13Z,16Z,19Z));TG(20:4(5Z,8Z,11Z,14Z)/22:5(4Z,7Z,10Z,13Z,16Z)/22:6(4Z,7Z,10Z,13Z,16Z,19Z));TG(20:4(5Z,8Z,11Z,14Z)/2…	6560.96	4497.73	7784.17	7970.73	5561.77	8526.53	826.653	3474.69	3639.5	789.905	5743.42	5058.84	5036.24	6816.98	3255.5	2.094	up	0.042499	0.105473	1.33073
POS	POS_718.642_8.7406	718.642	8.7406	SE 29:1/20:4	100	C49H80O2	SISE	Sitosterol ester				Cer(d18:0/26:0)	64193.2	78952.2	115409	98362.4	102065	106726	33966	50033.1	40241.1	44903.8	41662	59286.8	69650	94284.6	45015.5	2.0945	up	0.00011236	0.00101859	1.36388
POS	POS_690.596_7.0417	690.596	7.0417	DG 18:0_22:4	96.2	C43H76O5	DG	Diacylglycerol					28127.3	32152.4	24184	25078.9	56485.7	27945.4	15957.7	14399.3	14834.5	15125.4	20920.5	11339.8	23879.2	32329	15429.5	2.0953	up	0.00132116	0.00702559	1.29653
POS	POS_612.54_6.5942	612.54	6.5942	DG(16:0_18:1_0:0) - 1-(hexadecanoyloxy)-3-hydroxypropan-2-yl-octadec-9-enoate	70.24	C37H70O5	DG	Diacylglycerol					36271.8	58296.7	40851.6	74546.7	46295.8	55595.4	22942.7	19871.8	26691.6	24942.1	20465.1	33866	38386.4	51976.3	24796.6	2.0961	up	0.000369811	0.0025991	1.3368
POS	POS_688.596_8.3282	688.596	8.3282	CE 20:5	83.56	C47H74O2	CE	Cholesteryl ester				"Cer(d18:1/24:0);Cer(d18:0/24:1(15Z));CE(20:5(5Z,8Z,11Z,14Z,17Z));Cholesteryl (5Z,8Z,11Z,14Z,17Z-eicosapentaenoate)"	1.56872e+06	1.78045e+06	1.65461e+06	1.6669e+06	1.38174e+06	1.59222e+06	553450	819142	860146	787592	837595	739440	1.18683e+06	1.60744e+06	766228	2.0979	up	1.33038e-05	0.000196988	1.42334
POS	POS_676.654_7.5626	676.654	7.5626	Cer(d18:1/26:1)	83.27	C44H86N1O3	Cer						50148.5	73032.5	50683.7	61186.7	53195.2	60592.8	26594.7	20393.8	25793.2	25015.5	42861.2	25558.6	42921.4	58139.9	27702.8	2.0987	up	0.000177187	0.00144965	1.39724
POS	POS_1167.05_7.4777	1167.05	7.4777	PC 39:0_24:1	92	C71H140NO8P	PC	Phosphatidylcholine					16557.8	22203.4	14635.7	16594.5	16731	12092.7	7796.33	8744.93	8377.85	8845.29	8702.66	4615.25	12158.1	16469.2	7847.05	2.0988	up	0.00024337	0.00185366	1.36447
POS	POS_818.601_5.9757	818.601	5.9757	"PC(P-18:1(11Z)/22:5(4Z,7Z,10Z,13Z,16Z))"	75.6	C48H84NO7P	PC	Phosphatidylcholine	Diacylglycerophosphocholines [GP0101]	Glycerophosphocholines [GP01]	Glycerophospholipids [GP]	"PC(22:5(4Z,7Z,10Z,13Z,16Z)/P-18:1(11Z));PC(22:5(4Z,7Z,10Z,13Z,16Z)/P-18:1(9Z));PC(22:5(7Z,10Z,13Z,16Z,19Z)/P-18:1(11Z));PC(22:5(7Z,10Z,13Z,16Z,19Z)/P-18:1(9Z));PC(22:6(4Z,7Z,10Z,13Z,16Z,19Z)/P-18:0);PC(P-18:0/22:6(4Z,7Z,10Z,13Z,16Z,19Z));PC(P-18:1(11Z)/22:5(4Z,7Z,10Z,13Z,16Z));PC(P-18:1(11Z)/22:5(7Z,10Z,13Z,16Z,19Z));PC(P-18:1(9Z)/22:5(4Z,7Z,10Z,13Z,16Z));PC(P-18:1(9Z)/22:5(7Z,10Z,13Z,16Z,19Z));…	358658	355017	377690	367238	534602	365191	206589	208660	212055	210004	81140.2	204068	290076	393066	187086	2.101	up	0.0028629	0.0129134	1.35426
POS	POS_752.514_5.4367	752.514	5.4367	"PC(14:1(9Z)/20:4(5Z,8Z,11Z,14Z))"	89.53	C42H74NO8P	PC	Phosphatidylcholine	Diacylglycerophosphocholines [GP0101]	Glycerophosphocholines [GP01]	Glycerophospholipids [GP]	"Octachlorostyrene;DG(16:0/LTE4/0:0);DG(LTE4/16:0/0:0);DG(16:0/0:0/LTE4);DG(LTE4/0:0/16:0);DG(i-16:0/LTE4/0:0);DG(LTE4/i-16:0/0:0);DG(i-16:0/0:0/LTE4);DG(LTE4/0:0/i-16:0);Soyacerebroside I;PC(14:0/18:2(9Z,12Z));PC(14:1(9Z)/18:1(11Z));PC(14:1(9Z)/18:1(9Z));PC(16:1(9Z)/16:1(9Z));PC(18:1(11Z)/14:1(9Z));PC(18:1(9Z)/14:1(9Z));PC(18:2(9Z,12Z)/14:0);PE(15:0/20:2(11Z,14Z));PE(20:2(11Z,14Z)/15:0);PE-NMe(1…	44052.7	19233.9	51065.2	46447.5	40698.3	47207	17988.3	21436.5	24207.2	24241.2	18335	12049.1	30580.2	41450.8	19709.6	2.1031	up	0.00316511	0.0139537	1.26895
POS	POS_720.548_5.9966	720.548	5.9966	PC(15:0/16:0)	85.25	C39H78NO8P	PC	Phosphatidylcholine	Diacylglycerophosphocholines [GP0101]	Glycerophosphocholines [GP01]	Glycerophospholipids [GP]	PC(15:0/16:0);PC(16:0/15:0);PE(14:0/20:0);PE(16:0/18:0);PE(18:0/16:0);PE(20:0/14:0);PE-NMe2(16:0/16:0);PE-NMe(15:0/18:0);PE-NMe(18:0/15:0);PE-NMe2(14:0/18:0);PE-NMe2(18:0/14:0);PA(14:0/22:1(13Z));PA(18:1(11Z)/18:0);PA(18:1(9Z)/18:0);PA(20:0/16:1(9Z));PA(20:1(11Z)/16:0);PA(22:0/14:1(9Z));PA(22:1(13Z)/14:0)	48011	41562.9	55567.5	49251.8	40348.1	44977.6	27105.8	24602.6	24706.7	17711.5	4136.4	34531.3	34376.1	46619.8	22132.4	2.1064	up	0.032931	0.0863473	1.32837
POS	POS_856.695_7.4206	856.695	7.4206	PC O-28:1_14:1	100	C50H98NO7P	EtherPC	Ether-linked phosphatidylcholine				Isofucosterol 3-O-[6-O-(9-Octadecenoyl)-b-D-glucopyranoside];Sitosterol 3-O-(6'-O-linoleyl-beta-D-glucoside)	118399	188572	147902	158057	85547.8	129722	63859.5	58760.2	69092.3	64805.8	94403.3	41234.8	101696	138033	65359.3	2.1119	up	0.000730226	0.004406	1.3342
POS	POS_731.601_6.2539	731.601	6.2539	SM 34:1;2O/2:0	79.37	C41H83N2O6P	SM	Sphingomyelin	Ceramide phosphocholines (sphingomyelins) [SP0301]	Phosphosphingolipids [SP03]	Sphingolipids [SP]	SM(d18:1/18:0);SM(d18:0/18:1(11Z));SM(d18:0/18:1(9Z));ubiquinol-8	3.65696e+06	3.95338e+06	3.87751e+06	3.59074e+06	3.23748e+06	3.65794e+06	1.83289e+06	1.84122e+06	1.87463e+06	1.79644e+06	1.55566e+06	1.45566e+06	2.69421e+06	3.66233e+06	1.72608e+06	2.1218	up	2.09073e-07	9.07978e-06	1.44728
POS	POS_912.623_2.932	912.623	2.932	PC(PGD2/22:1(13Z))	72.6	C50H90NO11P	PC	Phosphatidylcholine	Diacylglycerophosphocholines [GP0101]	Glycerophosphocholines [GP01]	Glycerophospholipids [GP]	3-O-Sulfogalactosylceramide (d18:1/24:1(15Z));PC(20:0/PGF1alpha);PC(PGF1alpha/20:0)	154.304	256.545	89.5306	114.537	142.067	147.873	42.3088	42.8956	49.0208	35.3406	227.745	28.8797	110.921	150.809	71.0318	2.1231	up	0.0197454	0.0578283	1.41634
POS	POS_734.565_6.1755	734.565	6.1755	PC 32:0	71.82	C40H80NO8P	PC	Phosphatidylcholine	Diacylglycerophosphocholines [GP0101]	Glycerophosphocholines [GP01]	Glycerophospholipids [GP]	"PC(16:0/16:0);PC(14:0/18:0);PC(18:0/14:0);PE(15:0/20:0);PE(20:0/15:0);PE-NMe(16:0/18:0);PE-NMe(14:0/20:0);PE-NMe(18:0/16:0);PE-NMe(20:0/14:0);PE-NMe2(15:0/18:0);PE-NMe2(18:0/15:0);1,2-Dipalmitoylphosphatidylcholine;DG(22:4(7Z,10Z,13Z,16Z)/22:6(4Z,7Z,10Z,13Z,16Z,19Z)/0:0);DG(22:5(4Z,7Z,10Z,13Z,16Z)/22:5(4Z,7Z,10Z,13Z,16Z)/0:0);DG(22:5(4Z,7Z,10Z,13Z,16Z)/22:5(7Z,10Z,13Z,16Z,19Z)/0:0);DG(22:5(7Z,10…	1.72789e+06	1.90854e+06	1.75136e+06	1.69413e+06	1.48249e+06	1.70536e+06	785566	807586	811452	842948	658318	928319	1.25866e+06	1.71163e+06	805698	2.1244	up	2.80798e-07	1.1166e-05	1.44516
POS	POS_850.663_6.7495	850.663	6.7495	PC 42:5e	77.64	C50H92NO7P	PC	Phosphatidylcholine	Diacylglycerophosphocholines [GP0101]	Glycerophosphocholines [GP01]	Glycerophospholipids [GP]	"PC(O-22:1(13Z)/20:4(8Z,11Z,14Z,17Z));PC(22:0/P-18:1(11Z));PC(22:0/P-18:1(9Z));PC(22:1(13Z)/P-18:0);PC(24:1(15Z)/P-16:0);PC(P-16:0/24:1(15Z));PC(P-18:0/22:1(13Z));PC(P-18:1(11Z)/22:0);PC(P-18:1(9Z)/22:0);PC(O-18:2(9Z,12Z)/22:0)"	714974	996177	727366	780930	736603	776241	378623	352599	376765	338224	428809	346371	579474	788715	370232	2.1303	up	6.51649e-07	2.04791e-05	1.44023
POS	POS_820.613_6.3557	820.613	6.3557	"PC(22:4(7Z,10Z,13Z,16Z)/P-18:1(9Z))"	76.84	C48H86NO7P	PC	Phosphatidylcholine	Diacylglycerophosphocholines [GP0101]	Glycerophosphocholines [GP01]	Glycerophospholipids [GP]	"PS(18:0/20:0);PS(14:0/24:0);PS(16:0/22:0);PS(20:0/18:0);PS(22:0/16:0);PS(24:0/14:0);PC(18:0/18:1(12Z)-2OH(9,10));PC(18:1(12Z)-2OH(9,10)/18:0);PC(20:1(11Z)/P-18:1(11Z));PC(20:1(11Z)/P-18:1(9Z));PC(20:2(11Z,14Z)/P-18:0);PC(22:2(13Z,16Z)/P-16:0);PC(P-16:0/22:2(13Z,16Z));PC(P-18:0/20:2(11Z,14Z));PC(P-18:1(11Z)/20:1(11Z));PC(P-18:1(9Z)/20:1(11Z));PC(O-20:0/18:3(6Z,9Z,12Z));PC(O-20:0/18:3(9Z,12Z,15Z))…	367322	426861	388589	345525	566684	360135	209755	193018	203023	197908	180844	167952	300634	409186	192083	2.1303	up	4.1022e-05	0.000464039	1.41338
POS	POS_820.581_5.8602	820.581	5.8602	PC(17:0/22:6)	82.01	C47H83N1O8P1	PC	Phosphatidylcholine	Diacylglycerophosphocholines [GP0101]	Glycerophosphocholines [GP01]	Glycerophospholipids [GP]	"PE(20:0/22:6(4Z,7Z,10Z,13Z,16Z,19Z));PE(20:1(11Z)/22:5(4Z,7Z,10Z,13Z,16Z));PE(20:1(11Z)/22:5(7Z,10Z,13Z,16Z,19Z));PE(20:2(11Z,14Z)/22:4(7Z,10Z,13Z,16Z));PE(20:4(5Z,8Z,11Z,14Z)/22:2(13Z,16Z));PE(20:4(8Z,11Z,14Z,17Z)/22:2(13Z,16Z));PE(20:5(5Z,8Z,11Z,14Z,17Z)/22:1(13Z));PE(22:1(13Z)/20:5(5Z,8Z,11Z,14Z,17Z));PE(22:2(13Z,16Z)/20:4(5Z,8Z,11Z,14Z));PE(22:2(13Z,16Z)/20:4(8Z,11Z,14Z,17Z));PE(22:4(7Z,10Z,…	137574	101420	186021	170126	160748	145830	50827.5	54846.9	42611	71700.2	107809	95073.2	110382	150286	70477.9	2.1324	up	0.00176061	0.00880045	1.36484
POS	POS_794.712_8.1924	794.712	8.1924	TG(14:0/16:0/16:1(9Z))	73.47	C49H92O6	TG	Triacylglycerol	Triacylglycerols [GL0301]	Triradylglycerols [GL03]	Glycerolipids [GL]		605200	776240	594477	639825	589334	638670	230324	251147	289555	264376	363871	402477	470458	640624	300291	2.1333	up	9.74727e-05	0.000914318	1.428
NEG	NEG_769.621_7.0071	769.621	7.0071	"SM(d16:2(4E,8Z)/23:0)"	74.32	C44H87N2O6P	SM	Sphingomyelin	Ceramide phosphocholines (sphingomyelins) [SP0301]	Phosphosphingolipids [SP03]	Sphingolipids [SP]	"SM(d16:2(4E,8Z)/23:0);DG(22:0/18:1(12Z)-2OH(9,10)/0:0);DG(18:1(12Z)-2OH(9,10)/22:0/0:0);DG(22:0/0:0/18:1(12Z)-2OH(9,10));DG(18:1(12Z)-2OH(9,10)/0:0/22:0);DG(i-22:0/18:1(12Z)-2OH(9,10)/0:0);DG(18:1(12Z)-2OH(9,10)/i-22:0/0:0);DG(i-22:0/0:0/18:1(12Z)-2OH(9,10));DG(18:1(12Z)-2OH(9,10)/0:0/i-22:0)"	22963.7	20071.3	22306.6	24118.6	19733	26465.5	10565.9	11324.2	10464.1	11509.1	10378.3	9309.99	16600.9	22609.8	10591.9	2.1346	up	2.98391e-07	1.16512e-05	1.44605
POS	POS_848.647_6.6723	848.647	6.6723	"PC(20:0/18:1(12Z)-2OH(9,10))"	78.95	C46H90NO10P	PC	Phosphatidylcholine	Diacylglycerophosphocholines [GP0101]	Glycerophosphocholines [GP01]	Glycerophospholipids [GP]	"PC(22:1(13Z)/P-18:1(11Z));PC(22:1(13Z)/P-18:1(9Z));PC(22:2(13Z,16Z)/P-18:0);PC(P-18:0/22:2(13Z,16Z));PC(P-18:1(11Z)/22:1(13Z));PC(P-18:1(9Z)/22:1(13Z));PC(O-22:0/18:3(6Z,9Z,12Z));PC(O-22:0/18:3(9Z,12Z,15Z));SM(d20:1/PGF1alpha)"	219456	298436	245336	141434	362335	136179	95003.5	77954.9	89199	83722.4	89101.7	222128	171690	233863	109518	2.1354	up	0.00667777	0.0250491	1.2674
POS	POS_322.272_3.2075	322.272	3.2075	NAE 18:3	100	C20H35NO2	NAE	N-acyl ethanolamines	N-acyl ethanolamides (endocannabinoids) [FA0804]	Fatty amides [FA08]	Fatty Acyls [FA]	"Alpha-Linolenoyl ethanolamide;3-Dehydrosphinganine;Palmitoylethanolamide;L-Threo-Sphingosine C-18;Palmitoylethanolamine;Arachidonic acid;Cis-8,11,14,17-Eicosatetraenoic acid;Mesterolone;Drostanolone;Sideridiol;ent-17-Hydroxy-16beta-kauran-19-al;Yucalexin P21;Copalic acid;Junicedral;7,13-Eperudien-15-oic acid;Oryzalexin S;Oryzalexin E;2,6,10,14-Hexadecatetraenoic acid, 3,7,11,15-tetramethyl-, (Z,…	18668.2	22640.2	15923.2	16351.6	13508.9	15010.3	8609.52	7189.47	7602.2	6334.43	10062	7706.67	12467.2	17017.1	7917.39	2.1493	up	1.7086e-05	0.000240435	1.41729
POS	POS_860.6_6.4685	860.6	6.4685	PC(P-18:0/TXB2)	70.18	C46H86NO11P	PC	Phosphatidylcholine	Diacylglycerophosphocholines [GP0101]	Glycerophosphocholines [GP01]	Glycerophospholipids [GP]	"PS(22:0/18:1(12Z)-O(9S,10R));PS(18:1(12Z)-O(9S,10R)/22:0);PS(22:0/18:1(9Z)-O(12,13));PS(18:1(9Z)-O(12,13)/22:0);PC(18:0/PGF2alpha);PC(PGF2alpha/18:0);PC(18:0/PGE1);PC(PGE1/18:0);PC(18:0/PGD1);PC(PGD1/18:0);PC(18:1(11Z)/PGF1alpha);PC(PGF1alpha/18:1(11Z));PC(18:1(9Z)/PGF1alpha);PC(PGF1alpha/18:1(9Z));PC(20:0/5-iso PGF2VI);PC(5-iso PGF2VI/20:0);PC(P-18:0/6 keto-PGF1alpha);PC(6 keto-PGF1alpha/P-18:0…	50052.9	32691.1	62990.6	49643.8	42910.3	52085.7	23204	24132	24989.7	23504.9	16258.3	22346.4	35400.8	48395.7	22405.9	2.16	up	7.06686e-05	0.000715433	1.40154
POS	POS_1131.01_9.0387	1131.01	9.0387	TG 16:0_16:0_18:2;O(FA 18:0)	93	C71H132O8	TG_EST	Triacylglycerol estolides					12434.5	10437.8	14150.3	12710.8	20646.4	12811.4	2054.05	5734.12	6340.06	5949.66	9696.38	8739.11	10142	13865.2	6418.9	2.1601	up	0.010941	0.0365693	1.33741
POS	POS_725.551_5.8286	725.551	5.8286	SM 19:3;2O/17:1	77.07	C41H77N2O6P	SM	Sphingomyelin	Ceramide phosphocholines (sphingomyelins) [SP0301]	Phosphosphingolipids [SP03]	Sphingolipids [SP]	DG(19:0/6 keto-PGF1alpha/0:0);DG(6 keto-PGF1alpha/19:0/0:0);DG(19:0/0:0/6 keto-PGF1alpha);DG(6 keto-PGF1alpha/0:0/19:0);DG(19:0/TXB2/0:0);DG(TXB2/19:0/0:0);DG(19:0/0:0/TXB2);DG(TXB2/0:0/19:0);DG(i-19:0/6 keto-PGF1alpha/0:0);DG(6 keto-PGF1alpha/i-19:0/0:0);DG(i-19:0/0:0/6 keto-PGF1alpha);DG(6 keto-PGF1alpha/0:0/i-19:0);DG(i-19:0/TXB2/0:0);DG(TXB2/i-19:0/0:0);DG(i-19:0/0:0/TXB2);DG(TXB2/0:0/i-19:0)…	31163.6	38807.5	31506	24978.1	22394.4	26230.5	8461.7	7183.09	10165.8	10914.3	23106.7	20818.7	21310.9	29180	13441.7	2.1709	up	0.00544731	0.0214151	1.38785
POS	POS_1298.09_5.9069	1298.09	5.9069	SM 34:0;2O/44:12	73.79	C83H145N2O6P	SM	Sphingomyelin	Ceramide phosphocholines (sphingomyelins) [SP0301]	Phosphosphingolipids [SP03]	Sphingolipids [SP]		7768.03	6588.97	6967.3	7237.16	13706.1	8872.32	4452.04	4685.1	3248.83	4477.8	929.571	5702.26	6219.62	8523.32	3915.93	2.1766	up	0.021203	0.0611217	1.31688
POS	POS_682.641_8.9972	682.641	8.9972	SE 28:1/18:1	99.6	C46H80O2	CASE	Campesterol ester				DG(15:0/24:1(15Z)/0:0);DG(24:1(15Z)/15:0/0:0);DG(15:0/0:0/24:1n9)	72118.9	58804.6	64723	58935.3	111214	66305	27780.5	33713.2	24261.1	28382	34142.2	49819.6	52516.7	72016.9	33016.4	2.1812	up	0.000251521	0.001904	1.38816
POS	POS_641.506_6.6803	641.506	6.6803	DG 36:3	70.47	C39H70O5	DG	Diacylglycerol	Diacylglycerols [GL0201]	Diradylglycerols [GL02]	Glycerolipids [GL]	"DG(14:1(9Z)/22:2(13Z,16Z)/0:0);DG(16:0/20:3(5Z,8Z,11Z)/0:0);DG(16:0/20:3(8Z,11Z,14Z)/0:0);DG(16:1(9Z)/20:2(11Z,14Z)/0:0);DG(18:0/18:3(6Z,9Z,12Z)/0:0);DG(18:0/18:3(9Z,12Z,15Z)/0:0);DG(18:1(11Z)/18:2(9Z,12Z)/0:0);DG(18:1(9Z)/18:2(9Z,12Z)/0:0);DG(18:2(9Z,12Z)/18:1(11Z)/0:0);DG(18:2(9Z,12Z)/18:1(9Z)/0:0);DG(18:3(6Z,9Z,12Z)/18:0/0:0);DG(18:3(9Z,12Z,15Z)/18:0/0:0);DG(20:2(11Z,14Z)/16:1(9Z)/0:0);DG(20:…	11258.8	4839.64	13321.7	10400	16150	11730.8	4428.5	6825.61	5681.78	4194.95	1960.88	7939.02	8227.64	11283.5	5171.79	2.1817	up	0.0124255	0.0403836	1.27059
POS	POS_492.342_3.4924	492.342	3.4924	LPE O-20:2	100	C25H50NO6P	EtherLPE	Ether-linked lysophosphatidylethanolamine					4701.05	4180.31	4947.49	4862.84	6275.85	4605.69	2311.98	1894.27	2167.11	2002.78	2503.79	2673.76	3593.91	4928.87	2258.95	2.1819	up	1.46068e-06	3.70921e-05	1.45356
POS	POS_903.64_7.4652	903.64	7.4652	SM 8:1;2O/42:12	77.35	C55H87N2O6P	SM	Sphingomyelin	Ceramide phosphocholines (sphingomyelins) [SP0301]	Phosphosphingolipids [SP03]	Sphingolipids [SP]	"Teleocidin B 2;PS(22:0/20:3(6,8,11)-OH(5));PS(20:3(6,8,11)-OH(5)/22:0);PS(24:0/18:2(10E,12Z)+=O(9));PS(18:2(10E,12Z)+=O(9)/24:0);PS(24:0/18:2(9Z,11E)+=O(13));PS(18:2(9Z,11E)+=O(13)/24:0);PS(24:0/18:3(10,12,15)-OH(9));PS(18:3(10,12,15)-OH(9)/24:0);PS(24:0/18:3(9,11,15)-OH(13));PS(18:3(9,11,15)-OH(13)/24:0);PC(20:0/PGE2);PC(PGE2/20:0);PC(20:0/PGD2);PC(PGD2/20:0);PC(20:0/20:4(7E,9E,11Z,13E)-3OH(5S,…	4504.38	2710.56	4986.26	4379.36	3948.68	6265.97	2765.11	2298.57	2301.76	2546.88	1829.3	534.647	3255.96	4465.87	2046.04	2.1827	up	0.0165223	0.0505874	1.31713
POS	POS_970.78_7.9516	970.78	7.9516	"TG(20:4(8Z,11Z,14Z,17Z)/20:3(5Z,8Z,11Z)/20:4(8Z,11Z,14Z,17Z))"	70.24	C63H100O6	TG	Triacylglycerol	Triacylglycerols [GL0301]	Triradylglycerols [GL03]	Glycerolipids [GL]	"TG(20:4(5Z,8Z,11Z,14Z)/18:1(9Z)/22:6(4Z,7Z,10Z,13Z,16Z,19Z));TG(20:4(5Z,8Z,11Z,14Z)/18:2(9Z,12Z)/22:5(7Z,10Z,13Z,16Z,19Z));TG(20:5(5Z,8Z,11Z,14Z,17Z)/18:1(9Z)/22:5(7Z,10Z,13Z,16Z,19Z));TG(22:5(7Z,10Z,13Z,16Z,19Z)/16:0/22:6(4Z,7Z,10Z,13Z,16Z,19Z));TG(16:0/22:5(4Z,7Z,10Z,13Z,16Z)/22:6(4Z,7Z,10Z,13Z,16Z,19Z));TG(16:0/22:5(7Z,10Z,13Z,16Z,19Z)/22:6(4Z,7Z,10Z,13Z,16Z,19Z));TG(16:0/22:6(4Z,7Z,10Z,13Z,1…	700693	977133	719498	770663	724487	806134	264166	308874	356106	346319	460945	409137	570346	783101	357591	2.1899	up	2.45112e-05	0.00031321	1.4528
POS	POS_771.638_7.9724	771.638	7.9724	1-Dodecanoyl-2-hexadecanoyl-3-(9Z-hexadecenoyl)-sn-glycerol	72.3	C47H88O6			Triacylglycerols [GL0301]	Triradylglycerols [GL03]	Glycerolipids [GL]	"Pentadecanoylcarnitine;13-Methyltetradecanoylcarnitine;11-Methyltetradecanoylcarnitine;10-Methyltetradecanoylcarnitine;8-Methyltetradecanoylcarnitine;9-Methyltetradecanoylcarnitine;7-Methyltetradecanoylcarnitine;3-Methyltetradecanoylcarnitine;4-Methyltetradecanoylcarnitine;5-Methyltetradecanoylcarnitine;6-Methyltetradecanoylcarnitine;12-Methyltetradecanoylcarnitine;N-Stearoyl Threonine;4,4-Dimet…	12742	10911.7	16951.6	12105	11347.6	14955.4	6017.65	5383.53	6226.27	6490.14	6478.13	5229.75	9569.9	13168.9	5970.91	2.2055	up	1.15341e-05	0.000176646	1.45441
POS	POS_833.635_6.6691	833.635	6.6691	SM 18:1;2O/26:5	84.67	C49H89N2O6P	SM	Sphingomyelin	Ceramide phosphocholines (sphingomyelins) [SP0301]	Phosphosphingolipids [SP03]	Sphingolipids [SP]	"DG(a-25:0/PGF1alpha/0:0);DG(PGF1alpha/a-25:0/0:0);DG(a-25:0/0:0/PGF1alpha);DG(PGF1alpha/0:0/a-25:0);PE(22:0/18:1(12Z)-O(9S,10R));PE(18:1(12Z)-O(9S,10R)/22:0);PE(22:0/18:1(9Z)-O(12,13));PE(18:1(9Z)-O(12,13)/22:0)"	108819	69904.3	193817	182134	123151	136479	35975	56237.3	100129	111413	10017.7	54695	98564.3	135717	61411.3	2.21	up	0.040285	0.10114	1.3352
POS	POS_769.551_6.3337	769.551	6.3337	"SM(d17:1/20:4(6Z,8E,10E,14Z)-2OH(5S,12R))"	71.47	C42H77N2O8P	SM	Sphingomyelin	Ceramide phosphocholines (sphingomyelins) [SP0301]	Phosphosphingolipids [SP03]	Sphingolipids [SP]	"SM(d17:1/20:4(6Z,8E,10E,14Z)-2OH(5S,12R));SM(d17:1/20:4(6E,8Z,11Z,13E)-2OH(5S,15S));SM(d17:1/20:4(8Z,11Z,14Z,17Z)-2OH(5S,6R));SM(d17:2(4E,8Z)/20:3(8Z,11Z,14Z)-2OH(5,6));ubiquinol-8;SM(d17:1/18:1(12Z)-2OH(9,10));PC(14:0/20:5(5Z,8Z,11Z,14Z,17Z));PC(14:1(9Z)/20:4(5Z,8Z,11Z,14Z));PC(14:1(9Z)/20:4(8Z,11Z,14Z,17Z));PC(16:1(9Z)/18:4(6Z,9Z,12Z,15Z));PC(18:4(6Z,9Z,12Z,15Z)/16:1(9Z));PC(20:4(5Z,8Z,11Z,14Z…	358308	416575	378010	341940	539686	379310	170353	176166	213663	185075	142934	203106	292094	402305	181883	2.2119	up	5.08714e-06	9.40758e-05	1.45443
POS	POS_940.733_7.5578	940.733	7.5578	TG 18:3_20:4_20:5	100	C61H94O6	TG	Triacylglycerol				"TG(18:3(9Z,12Z,15Z)/18:3(9Z,12Z,15Z)/22:6(4Z,7Z,10Z,13Z,16Z,19Z));TG(18:3(9Z,12Z,15Z)/20:4(5Z,8Z,11Z,14Z)/20:5(5Z,8Z,11Z,14Z,17Z));TG(20:5(5Z,8Z,11Z,14Z,17Z)/18:2(9Z,12Z)/20:5(5Z,8Z,11Z,14Z,17Z));TG(14:0/22:6(4Z,7Z,10Z,13Z,16Z,19Z)/22:6(4Z,7Z,10Z,13Z,16Z,19Z));TG(14:1(9Z)/22:5(4Z,7Z,10Z,13Z,16Z)/22:6(4Z,7Z,10Z,13Z,16Z,19Z));TG(14:1(9Z)/22:5(7Z,10Z,13Z,16Z,19Z)/22:6(4Z,7Z,10Z,13Z,16Z,19Z));TG(14:…	12930.2	13256.1	10670.2	12874.3	12650.9	13541.7	2392.38	2407.09	2285.82	2327.53	8412.42	15910.5	9138.26	12653.9	5622.62	2.2505	up	0.0207356	0.0600616	1.53671
POS	POS_619.523_7.1942	619.523	7.1942	DG 8:0_26:0	95.56	C37H72O5	DG	Diacylglycerol				DG(14:0/20:0/0:0);DG(16:0/18:0/0:0);DG(18:0/16:0/0:0);DG(20:0/14:0/0:0);DG(14:0/0:0/20:0);DG(16:0/0:0/18:0);DG(10:0/i-24:0/0:0);DG(10:0/0:0/i-24:0);DG(12:0/22:0/0:0);DG(12:0/0:0/22:0);DG(i-12:0/22:0/0:0);DG(i-12:0/0:0/22:0);DG(i-12:0/i-22:0/0:0);DG(i-12:0/0:0/i-22:0);DG(12:0/i-22:0/0:0);DG(12:0/0:0/i-22:0);DG(13:0/21:0/0:0);DG(13:0/0:0/21:0);DG(i-13:0/21:0/0:0);DG(i-13:0/0:0/21:0);DG(a-13:0/i-21:…	397532	275666	548026	461203	417162	476548	163231	188600	187280	207702	152514	244939	310034	429356	190711	2.2513	up	7.65517e-05	0.000764386	1.4377
POS	POS_591.49_6.8609	591.49	6.8609	DG(16:0/16:0/0:0)	87.61	C35H68O5	DG	Diacylglycerol	Diacylglycerols [GL0201]	Diradylglycerols [GL02]	Glycerolipids [GL]	"DG(14:0/18:0/0:0);DG(16:0/16:0/0:0);DG(18:0/14:0/0:0);Glycerol 1,3-dihexadecanoate;DG(14:0/0:0/18:0);DG(8:0/i-24:0/0:0);DG(8:0/0:0/i-24:0);DG(10:0/22:0/0:0);DG(10:0/0:0/22:0);DG(10:0/i-22:0/0:0);DG(10:0/0:0/i-22:0);DG(12:0/20:0/0:0);DG(12:0/0:0/20:0);DG(i-12:0/20:0/0:0);DG(i-12:0/0:0/20:0);DG(i-12:0/i-20:0/0:0);DG(i-12:0/0:0/i-20:0);DG(12:0/i-20:0/0:0);DG(12:0/0:0/i-20:0);DG(13:0/19:0/0:0);DG(13…	50953.5	27276.4	126660	63915.8	54927.1	57367.4	20968.2	26202.7	25933.6	34746	29456.4	31629.5	45836.4	63516.8	28156.1	2.2559	up	0.0136329	0.0434922	1.22764
POS	POS_974.806_8.2228	974.806	8.2228	"TG(18:3(9Z,12Z,15Z)/20:1(11Z)/22:5(7Z,10Z,13Z,16Z,19Z))"	75.56	C63H104O6	TG	Triacylglycerol	Triacylglycerols [GL0301]	Triradylglycerols [GL03]	Glycerolipids [GL]		510279	598791	538308	561476	665621	590015	191522	182765	253059	246989	302647	354729	416350	577415	255285	2.2618	up	0.00022367	0.00173521	1.48364
POS	POS_760.582_6.195	760.582	6.195	PC(20:0/14:1(9Z))	94.12	C42H82NO8P	PC	Phosphatidylcholine	Diacylglycerophosphocholines [GP0101]	Glycerophosphocholines [GP01]	Glycerophospholipids [GP]	PC(14:0/20:1(11Z));PC(14:1(9Z)/20:0);PC(16:0/18:1(11Z));PC(16:0/18:1(9Z));PC(16:1(9Z)/18:0);PC(18:0/16:1(9Z));PC(18:1(11Z)/16:0);PC(18:1(9Z)/16:0);PC(20:0/14:1(9Z));PC(20:1(11Z)/14:0);PE(15:0/22:1(13Z));PE(22:1(13Z)/15:0);PE-NMe(18:0/18:1(9Z));PE-NMe(18:0/18:1(11Z));PE-NMe(14:1(9Z)/22:0);PE-NMe(16:0/20:1(11Z));PE-NMe(16:1(9Z)/20:0);PE-NMe(14:0/22:1(13Z));PE-NMe(18:1(11Z)/18:0);PE-NMe(18:1(9Z)/18:…	3.37548e+07	3.62671e+07	3.47625e+07	3.23466e+07	2.69148e+07	3.31324e+07	1.44894e+07	1.53702e+07	1.55939e+07	1.59592e+07	1.28867e+07	1.28606e+07	2.36949e+07	3.2863e+07	1.45267e+07	2.2623	up	6.53351e-08	4.03085e-06	1.50365
POS	POS_866.657_6.7188	866.657	6.7188	"PC(22:0/20:4(5Z,8Z,11Z,14Z))"	98.22	C50H92NO8P	PC	Phosphatidylcholine	Diacylglycerophosphocholines [GP0101]	Glycerophosphocholines [GP01]	Glycerophospholipids [GP]	"PC(18:3(6Z,9Z,12Z)/24:1(15Z));PC(18:3(9Z,12Z,15Z)/24:1(15Z));PC(18:4(6Z,9Z,12Z,15Z)/24:0);PC(20:0/22:4(7Z,10Z,13Z,16Z));PC(20:2(11Z,14Z)/22:2(13Z,16Z));PC(20:3(5Z,8Z,11Z)/22:1(13Z));PC(20:3(8Z,11Z,14Z)/22:1(13Z));PC(20:4(5Z,8Z,11Z,14Z)/22:0);PC(20:4(8Z,11Z,14Z,17Z)/22:0);PC(22:0/20:4(5Z,8Z,11Z,14Z));PC(22:0/20:4(8Z,11Z,14Z,17Z));PC(22:1(13Z)/20:3(5Z,8Z,11Z));PC(22:1(13Z)/20:3(8Z,11Z,14Z));PC(22:…	488792	675192	497847	545398	425941	523499	272769	67989.4	248141	249237	249276	303510	378966	526112	231821	2.2695	up	0.00939893	0.0326068	1.40985
NEG	NEG_881.52_5.1746	881.52	5.1746	PI(18:2/20:4)	70.67	C47H78O13P1	PI	Sphingolipids	Diacylglycerophosphoinositols [GP0601]	Glycerophosphoinositols [GP06]	Glycerophospholipids [GP]	"Pentanoic acid, 5-(dipentylamino)-5-oxo-4-((3-quinolinylcarbonyl)amino)-, (R)-;Roxithromycin;Amitenone;PG(18:1(11Z)/22:6(5Z,7Z,10Z,13Z,16Z,19Z)-OH(4));PG(22:6(5Z,7Z,10Z,13Z,16Z,19Z)-OH(4)/18:1(11Z));PG(18:1(11Z)/22:6(4Z,8Z,10Z,13Z,16Z,19Z)-OH(7));PG(22:6(4Z,8Z,10Z,13Z,16Z,19Z)-OH(7)/18:1(11Z));PG(18:1(11Z)/22:6(4Z,7Z,10Z,12E,16Z,19Z)-OH(14));PG(22:6(4Z,7Z,10Z,12E,16Z,19Z)-OH(14)/18:1(11Z));PG(18…	13540.9	12175.8	13017.6	15194.9	11895.6	16360.8	6230.9	6668.65	6027.11	6335.93	5805.85	5077.88	9860.99	13697.6	6024.39	2.2737	up	3.3299e-07	1.26035e-05	1.50215
POS	POS_1094.97_9.4576	1094.97	9.4576	PC 58:2	82.1	C66H128NO8P	PC	Phosphatidylcholine					11550.7	17662.7	12107.2	14135	10261.2	14074.3	1540.09	5932.34	5118.71	5243.15	12005.6	5251.11	9573.5	13298.5	5848.5	2.2738	up	0.0146071	0.0458718	1.4221
POS	POS_1232.02_7.1998	1232.02	7.1998	SM 72:10;O2	74.4	C77H135N2O7P	ASM	Acylsphingomyelin					51254.8	46713.4	53188.1	72949.4	45805.5	45570.7	26377.9	28123.3	16834.3	25944.1	21393.8	19853.6	37834.1	52580.3	23087.8	2.2774	up	2.0539e-05	0.000274679	1.46992
POS	POS_622.405_2.5251	622.405	2.5251	PC(16:0/7:0(CHO))	87.06	C31H61N1O9P1	PC	Phosphatidylcholine	Diacylglycerophosphocholines [GP0101]	Glycerophosphocholines [GP01]	Glycerophospholipids [GP]	"PA(10:0/18:1(12Z)-O(9S,10R));PA(18:1(12Z)-O(9S,10R)/10:0);PA(10:0/18:1(9Z)-O(12,13));PA(18:1(9Z)-O(12,13)/10:0)"	12651	13148.5	22318.5	8473.96	15423	12547.3	4219.23	6037.03	6220.85	5538.77	5943.36	8879.76	10116.8	14093.7	6139.83	2.2955	up	0.000636081	0.00395953	1.39854
POS	POS_711.539_5.6056	711.539	5.6056	SM 19:3;2O/16:1	85.05	C40H75N2O6P	SM	Sphingomyelin	Ceramide phosphocholines (sphingomyelins) [SP0301]	Phosphosphingolipids [SP03]	Sphingolipids [SP]	"DG(18:0/6 keto-PGF1alpha/0:0);DG(6 keto-PGF1alpha/18:0/0:0);DG(18:0/0:0/6 keto-PGF1alpha);DG(6 keto-PGF1alpha/0:0/18:0);DG(18:0/TXB2/0:0);DG(TXB2/18:0/0:0);DG(18:0/0:0/TXB2);DG(TXB2/0:0/18:0);DG(i-18:0/6 keto-PGF1alpha/0:0);DG(6 keto-PGF1alpha/i-18:0/0:0);DG(i-18:0/0:0/6 keto-PGF1alpha);DG(6 keto-PGF1alpha/0:0/i-18:0);DG(i-18:0/TXB2/0:0);DG(TXB2/i-18:0/0:0);DG(i-18:0/0:0/TXB2);DG(TXB2/0:0/i-18:0…	48140.1	41855.4	58763.4	53635.5	63420.2	56500.9	19109.1	22453.8	23858.8	24597.6	6737.65	43136	38517.4	53719.2	23315.5	2.304	up	0.0110403	0.036825	1.4454
POS	POS_797.655_7.984	797.655	7.984	SM 18:2;O2/23:1	100	C46H89N2O6P	SM	Sphingomyelin				"SM(d18:2(4E,14Z)/23:1(9Z));TG(16:1(9Z)/14:0/16:1(9Z));TG(14:0/14:0/18:2(9Z,12Z));TG(14:0/14:1(9Z)/18:1(11Z));TG(14:0/14:1(9Z)/18:1(9Z));TG(14:0/16:1(9Z)/16:1(9Z));TG(14:0/18:1(11Z)/14:1(9Z));TG(14:0/18:1(9Z)/14:1(9Z));TG(14:0/18:2(9Z,12Z)/14:0);TG(16:0/14:1(9Z)/16:1(9Z));TG(16:0/16:1(9Z)/14:1(9Z));TG(18:0/14:1(9Z)/14:1(9Z));TG(14:1(9Z)/14:0/18:1(11Z));TG(14:1(9Z)/14:0/18:1(9Z));TG(14:1(9Z)/16:0/…	18057.9	16342.5	20560.7	19718.6	17771.4	21145.9	8059.03	8022.92	7406.01	10275	8199.6	7124.95	13557	18932.8	8181.25	2.3142	up	2.9132e-07	1.14095e-05	1.52373
POS	POS_647.554_7.4976	647.554	7.4976	DG 36:0	96.96	C39H76O5	DG	Diacylglycerol				"DG(14:0/22:0/0:0);DG(16:0/20:0/0:0);DG(18:0/18:0/0:0);DG(20:0/16:0/0:0);DG(22:0/14:0/0:0);Glycerol 1,2-dioctadecanoate;DG(14:0/0:0/22:0);DG(16:0/0:0/20:0);DG(18:0/0:0/18:0);DG(i-12:0/i-24:0/0:0);DG(i-12:0/0:0/i-24:0);DG(12:0/i-24:0/0:0);DG(12:0/0:0/i-24:0);DG(i-14:0/22:0/0:0);DG(i-14:0/0:0/22:0);DG(i-14:0/i-22:0/0:0);DG(i-14:0/0:0/i-22:0);DG(14:0/i-22:0/0:0);DG(14:0/0:0/i-22:0);DG(15:0/21:0/0:0)…	354962	253616	447006	402404	368948	406099	163585	160965	157446	168119	139205	171542	266158	372173	160144	2.324	up	4.92208e-05	0.000535972	1.49691
POS	POS_352.319_2.553	352.319	2.553	NAE 20:2	100	C22H41NO2	NAE	N-acyl ethanolamines	N-acyl ethanolamides (endocannabinoids) [FA0804]	Fatty amides [FA08]	Fatty Acyls [FA]	"Docosatrienoic acid;(all-Z)-7,10,13-Docosatrienoic acid;13,16,19-Docosatrienoic acid"	39748.4	37300.2	34920.9	34139.2	34415.4	22954.4	9455.02	13002.8	12768.5	19528.6	9305.67	23267.8	24233.9	33913.1	14554.7	2.33	up	0.00103584	0.00579925	1.47124
POS	POS_842.624_5.9196	842.624	5.9196	PC O-42:9	83.9	C50H84NO7P	EtherPC	Ether-linked phosphatidylcholine				"PE(22:0/20:3(6,8,11)-OH(5));PE(20:3(6,8,11)-OH(5)/22:0);PE(24:0/18:2(10E,12Z)+=O(9));PE(18:2(10E,12Z)+=O(9)/24:0);PE(24:0/18:2(9Z,11E)+=O(13));PE(18:2(9Z,11E)+=O(13)/24:0);PE(24:0/18:3(10,12,15)-OH(9));PE(18:3(10,12,15)-OH(9)/24:0);PE(24:0/18:3(9,11,15)-OH(13));PE(18:3(9,11,15)-OH(13)/24:0);PE(24:1(15Z)/18:1(12Z)-O(9S,10R));PE(18:1(12Z)-O(9S,10R)/24:1(15Z));PE(24:1(15Z)/18:1(9Z)-O(12,13));PE(18:…	21942.5	26655.8	25970.3	26150.4	48299.2	23905.2	12955.3	11851.4	14156.2	16727	3772.7	14368	20562.8	28820.6	12305.1	2.3422	up	0.00751917	0.0274693	1.39824
POS	POS_768.549_6.3331	768.549	6.3331	"PE(18:0/20:4(5Z,8Z,11Z,14Z))"	85.12	C43H78NO8P	PE	Phosphatidylethanolamine	Diacylglycerophosphoethanolamines [GP0201]	Glycerophosphoethanolamines [GP02]	Glycerophospholipids [GP]	"PC(15:0/20:4(5Z,8Z,11Z,14Z));PC(15:0/20:4(8Z,11Z,14Z,17Z));PC(20:4(5Z,8Z,11Z,14Z)/15:0);PC(20:4(8Z,11Z,14Z,17Z)/15:0);PE(16:0/22:4(7Z,10Z,13Z,16Z));PE(16:1(9Z)/20:3(8Z,11Z,14Z));PE(18:0/20:4(5Z,8Z,11Z,14Z));PE(18:0/20:4(8Z,11Z,14Z,17Z));PE(18:1(11Z)/20:3(5Z,8Z,11Z));PE(18:1(11Z)/20:3(8Z,11Z,14Z));PE(18:1(9Z)/20:3(5Z,8Z,11Z));PE(18:1(9Z)/20:3(8Z,11Z,14Z));PE(18:2(9Z,12Z)/20:2(11Z,14Z));PE(18:3(6Z…	913036	1.00213e+06	924729	922553	844707	898138	364887	364022	418149	408145	294357	500455	654609	917549	391669	2.3427	up	2.87982e-05	0.000353527	1.53676
NEG	NEG_744.553_6.2044	744.553	6.2044	PC(15:0/18:1(11Z))	70.47	C41H80NO8P	PC	Phosphatidylcholine	Diacylglycerophosphocholines [GP0101]	Glycerophosphocholines [GP01]	Glycerophospholipids [GP]	PC(15:0/18:1(11Z));PC(15:0/18:1(9Z));PC(18:1(11Z)/15:0);PC(18:1(9Z)/15:0);PE(14:0/22:1(13Z));PE(14:1(9Z)/22:0);PE(16:0/20:1(11Z));PE(16:1(9Z)/20:0);PE(18:0/18:1(11Z));PE(18:0/18:1(9Z));PE(18:1(11Z)/18:0);PE(18:1(9Z)/18:0);PE(20:0/16:1(9Z));PE(20:1(11Z)/16:0);PE(22:0/14:1(9Z));PE(22:1(13Z)/14:0);PE-NMe2(16:0/18:1(9Z));PE-NMe(15:0/20:1(11Z));PE-NMe(20:1(11Z)/15:0);PE-NMe2(14:0/20:1(11Z));PE-NMe2(14…	32431.4	36799.7	39047.1	40931.9	38029	37899.6	15490.5	16261	15811.5	15607.3	16922.8	15985.5	26768.1	37523.1	16013.1	2.3433	up	9.51728e-08	5.1837e-06	1.54696
POS	POS_1237.11_7.2043	1237.11	7.2043	PC 42:0_26:1	74.02	C76H150NO8P	PC	Phosphatidylcholine	Diacylglycerophosphocholines [GP0101]	Glycerophosphocholines [GP01]	Glycerophospholipids [GP]	Heptacarboxyporphyrin	28286.3	39482.2	26905.4	29186.8	19880.3	23816.3	14320.2	12693	12879.5	11551.3	12270.2	7580.6	19904.3	27926.2	11882.5	2.3502	up	6.61368e-05	0.000678832	1.47626
POS	POS_908.73_7.5617	908.73	7.5617	TG 19:3_19:3_16:2;O	100	C57H94O7	OxTG	Oxidized triglyceride					74935.5	120926	44356.5	81265.3	115506	80545.2	29052.7	29347.7	35515	35595.6	31115.6	58728.7	61407.4	86255.6	36559.2	2.3593	up	0.00124608	0.00670966	1.40208
POS	POS_898.847_9.1401	898.847	9.1401	SE 28:1/34:5	100	C62H104O2	CASE	Campesterol ester					26281.6	39865	27636.6	27507.9	33432.4	29336.6	8527.6	8334.94	10534.4	14339.2	16908	19208.8	21826.1	30676.7	12975.5	2.3642	up	0.00079721	0.00471901	1.49675
POS	POS_1236.02_6.8405	1236.02	6.8405	SM 72:8;O2	72.5	C77H139N2O7P	ASM	Acylsphingomyelin				"Cer(d18:0/PGJ2);Cer(d18:1/20:4(6Z,8E,10E,14Z)-2OH(5S,12R));Cer(d18:1/20:4(6E,8Z,11Z,13E)-2OH(5S,15S));Cer(d18:1/20:4(8Z,11Z,14Z,17Z)-2OH(5S,6R));Cer(d18:2(4E,14Z)/20:3(8Z,11Z,14Z)-2OH(5,6));Cer(t18:0/20:4(6E,8Z,11Z,14Z)+=O(5));Cer(t18:0/20:4(5Z,8Z,11Z,13E)+=O(15));Cer(t18:0/20:5(5Z,8Z,11Z,14Z,16E)-OH(18R));Cer(t18:0/20:5(5Z,8Z,11Z,14Z,16E)-OH(18));Cer(t18:0/20:5(5Z,8Z,10E,14Z,17Z)-OH(12));Cer(t1…	4003.58	2554.36	5731.52	3855.33	4927	4372.38	1619.26	1917.48	1756.96	2556.11	987.977	1846.55	3010.71	4240.7	1780.72	2.3814	up	0.000445412	0.00300623	1.45884
POS	POS_1242.07_7.1941	1242.07	7.1941	SM 44:5;O2(FA 28:0)	96.9	C77H145N2O7P	ASM	Acylsphingomyelin					20601.2	13153.4	24232.4	22720.2	17015.8	21847.2	5478.24	7706.48	6537.94	8427.4	6329.28	15557.1	14133.9	19928.4	8339.41	2.3897	up	0.000759134	0.00453295	1.48945
POS	POS_826.756_7.8363	826.756	7.8363	Cer 20:1;O2/34:4;O	95.8	C54H99NO4	Cer_HS	Ceramide hydroxy fatty acid-sphingosine					14861.9	18866.6	16298.5	16909.1	24773.6	17867.2	5925.78	4068.41	4604.53	6432.88	6024.49	18598.1	12935.9	18262.8	7609.04	2.4001	up	0.00470171	0.0190568	1.52315
POS	POS_968.768_7.7982	968.768	7.7982	"TG(20:5(5Z,8Z,11Z,14Z,17Z)/18:2(9Z,12Z)/22:5(7Z,10Z,13Z,16Z,19Z))"	70.88	C63H98O6	TG	Triacylglycerol	Triacylglycerols [GL0301]	Triradylglycerols [GL03]	Glycerolipids [GL]		485361	701535	477135	548653	490181	551757	164144	204360	215490	224229	328333	218787	384164	542437	225891	2.4013	up	2.60402e-05	0.000327644	1.53601
POS	POS_1160_6.852	1160	6.852	SM 66:4;O2	75.6	C71H135N2O7P	ASM	Acylsphingomyelin					22957.8	6893.4	39425.6	25513.3	32270.2	23270.1	7499.84	10856.4	9315.56	11762.1	3661.6	19301.4	17727.3	25055.1	10399.5	2.4093	up	0.0266219	0.0729394	1.26717
POS	POS_628.584_5.4476	628.584	5.4476	DG(15:0/20:0/0:0)	70.42	C38H74O5	DG	Diacylglycerol	Diacylglycerols [GL0201]	Diradylglycerols [GL02]	Glycerolipids [GL]	DG(15:0/20:0/0:0);DG(20:0/15:0/0:0);DG(15:0/0:0/20:0);DG(10:0/a-25:0/0:0);DG(10:0/0:0/a-25:0);DG(13:0/22:0/0:0);DG(13:0/0:0/22:0);DG(i-13:0/22:0/0:0);DG(i-13:0/0:0/22:0);DG(a-13:0/i-22:0/0:0);DG(a-13:0/0:0/i-22:0);DG(a-13:0/22:0/0:0);DG(a-13:0/0:0/22:0);DG(i-13:0/i-22:0/0:0);DG(i-13:0/0:0/i-22:0);DG(13:0/i-22:0/0:0);DG(13:0/0:0/i-22:0);DG(14:0/21:0/0:0);DG(14:0/0:0/21:0);DG(i-14:0/21:0/0:0);DG(i-…	5780.37	8063.98	4259.85	4197.23	6027.66	4857.89	4220.51	2769.93	1365.18	1840.26	1283.95	2144.1	3900.91	5531.17	2270.65	2.4359	up	0.00202383	0.00984833	1.48945
POS	POS_914.766_8.0636	914.766	8.0636	TG 18:1_18:1_18:3;O	100	C57H100O7	OxTG	Oxidized triglyceride				PE(24:0/24:1(15Z));PE(24:1(15Z)/24:0);PE-NMe2(22:0/24:1(15Z));PE-NMe2(22:1(13Z)/24:0);PE-NMe2(24:0/22:1(13Z));PE-NMe2(24:1(15Z)/22:0)	98800.9	98917.5	127414	108643	77072	140245	31205.6	33814.5	40444.9	68705.7	58019	33835.8	76426.5	108515	44337.6	2.4475	up	0.000301732	0.0022049	1.51811
POS	POS_799.632_6.599	799.632	6.599	"SM(d18:0/22:2(13Z,16Z)(OH))"	78.31	C45H87N2O7P	SM	Sphingomyelin	Ceramide phosphocholines (sphingomyelins) [SP0301]	Phosphosphingolipids [SP03]	Sphingolipids [SP]	"SM(d18:0/22:2(13Z,16Z)(OH));CE(15M5);PE(22:2(13Z,16Z)/P-18:1(11Z));PE(22:2(13Z,16Z)/P-18:1(9Z));PE(P-18:1(11Z)/22:2(13Z,16Z));PE(P-18:1(9Z)/22:2(13Z,16Z))"	451163	340855	460565	523783	451754	515490	165423	132437	142825	288425	132135	257205	321838	457268	186408	2.453	up	0.000525673	0.00341668	1.5394
POS	POS_946.701_2.3079	946.701	2.3079	PC(PGF1alpha/24:0)	72.6	C52H100NO11P	PC	Phosphatidylcholine	Diacylglycerophosphocholines [GP0101]	Glycerophosphocholines [GP01]	Glycerophospholipids [GP]		51.4337	27.46	33.3944	63.8358	50.5703	71.1515	41.0211	17.1495	16.0366	8.98166	20.841	17.1155	34.9159	49.641	20.1909	2.4586	up	0.00402616	0.0168855	1.44162
POS	POS_640.583_7.2045	640.583	7.2045	DG 18:0_18:1	100	C39H74O5	DG	Diacylglycerol				DG(14:0/22:1(13Z)/0:0);DG(14:1(9Z)/22:0/0:0);DG(16:0/20:1(11Z)/0:0);DG(16:1(9Z)/20:0/0:0);DG(18:0/18:1(11Z)/0:0);DG(18:0/18:1(9Z)/0:0);DG(18:1(11Z)/18:0/0:0);DG(18:1(9Z)/18:0/0:0);DG(20:0/16:1(9Z)/0:0);DG(20:1(11Z)/16:0/0:0);DG(22:0/14:1(9Z)/0:0);DG(22:1(13Z)/14:0/0:0);DG(14:0/0:0/22:1n9);DG(16:0/0:0/20:1n9);DG(18:0/0:0/18:1n7);DG(18:0/0:0/18:1n9);DG(20:0/0:0/16:1n7);DG(22:0/0:0/14:1n5)	245401	385874	265974	292059	272865	295223	103956	97963.8	115271	104087	169612	123732	206002	292899	119104	2.4592	up	7.82723e-06	0.000131351	1.55889
POS	POS_955.762_8.2998	955.762	8.2998	TG 18:2_18:2_22:3	100	C61H104O6	TG	Triacylglycerol					24861.5	13133.8	22024.4	19182.8	29677.9	27101.9	5208.7	4275.78	10793.7	10671.5	9581.5	14680.2	15932.8	22663.7	9201.89	2.4629	up	0.00282055	0.0127601	1.47048
POS	POS_697.582_8.4134	697.582	8.4134	DG 40:3	100	C43H78O5	DG	Diacylglycerol				"DG(20:0/22:6(4Z,7Z,10Z,13Z,16Z,19Z)/0:0);DG(20:1(11Z)/22:5(4Z,7Z,10Z,13Z,16Z)/0:0);DG(20:1(11Z)/22:5(7Z,10Z,13Z,16Z,19Z)/0:0);DG(20:2(11Z,14Z)/22:4(7Z,10Z,13Z,16Z)/0:0);DG(20:4(5Z,8Z,11Z,14Z)/22:2(13Z,16Z)/0:0);DG(20:4(8Z,11Z,14Z,17Z)/22:2(13Z,16Z)/0:0);DG(20:5(5Z,8Z,11Z,14Z,17Z)/22:1(13Z)/0:0);DG(22:1(13Z)/20:5(5Z,8Z,11Z,14Z,17Z)/0:0);DG(22:2(13Z,16Z)/20:4(5Z,8Z,11Z,14Z)/0:0);DG(22:2(13Z,16Z)/2…	26732	32157.5	36533.1	33213.5	49542.4	35515	4712.9	15437.1	12418.2	16853.3	15158.7	22147.4	25035.1	35615.6	14454.6	2.464	up	0.00496461	0.0199099	1.49104
NEG	NEG_303.234_3.2056	303.234	3.2056	FA 20:4	100	C20H32O2	FA	Fatty acyls	Unsaturated fatty acids [FA0103]	Fatty Acids and Conjugates [FA01]	Fatty Acyls [FA]	"Arachidonic acid;Cis-8,11,14,17-Eicosatetraenoic acid;Mesterolone;Drostanolone;Sideridiol;ent-17-Hydroxy-16beta-kauran-19-al;Yucalexin P21;Copalic acid;Junicedral;7,13-Eperudien-15-oic acid;Oryzalexin S;Oryzalexin E;2,6,10,14-Hexadecatetraenoic acid, 3,7,11,15-tetramethyl-, (Z,E,E)-;5,8,11,14-Icosatetraenoic Acid;Eicosatetraenoic acid;Mestaline;Methandriol;Oryzalexin D;Oryzalexin F;abietadiene-d…	1.19228e+06	935353	1.05695e+06	1.30831e+06	900136	1.32019e+06	495002	489234	468471	503999	411102	352909	786162	1.11887e+06	453453	2.4674	up	1.73348e-06	4.22804e-05	1.56184
POS	POS_912.863_9.2053	912.863	9.2053	CE 36:5	100	C63H106O2	CE	Cholesteryl ester					33781.7	47030.4	30288.2	28195.3	41231.2	38083.9	3114.05	13106.9	12049.1	15685.6	20627.5	23947.6	25595.1	36435.1	14755.1	2.4693	up	0.0152855	0.0476044	1.48326
POS	POS_951.735_8.0577	951.735	8.0577	TG 16:4_20:4_22:1	78.03	C61H100O6	TG	Triacylglycerol	Triacylglycerols [GL0301]	Triradylglycerols [GL03]	Glycerolipids [GL]		41630.2	27112.6	45947.7	39784.5	111646	47361.2	13170.4	13667.8	18602.3	16918.2	16453.1	47029.2	36610.3	52247	20973.5	2.4911	up	0.00675486	0.0252579	1.38358
POS	POS_856.702_7.4226	856.702	7.4226	PC(24:0/P-18:1(11Z))	71.64	C50H98NO7P	PC	Phosphatidylcholine	Diacylglycerophosphocholines [GP0101]	Glycerophosphocholines [GP01]	Glycerophospholipids [GP]	Isofucosterol 3-O-[6-O-(9-Octadecenoyl)-b-D-glucopyranoside];Sitosterol 3-O-(6'-O-linoleyl-beta-D-glucoside)	182942	263174	170524	199160	224402	194376	75295	69549	77722.6	76597.7	111793	84087	144135	205763	82507.4	2.4939	up	1.88852e-06	4.50034e-05	1.57563
POS	POS_914.841_8.9979	914.841	8.9979	TG O-18:0_18:0_20:4	100	C59H108O5	EtherTG	Ether-linked triacylglycerol					31609.4	27519.4	30993	37561.8	20053	37588	5494	11071.6	12136.5	17631.3	15353.2	12612.9	21635.3	30887.4	12383.2	2.4943	up	0.00108293	0.00601354	1.51079
NEG	NEG_279.196_1.4942	279.196	1.4942	FA 17:3;O	100	C17H28O3	OxFA	Oxidized fatty acid				"12S-HHT;Dihydropanaxacol;Fauronyl acetate;Valeracetate;3-Methyl-5-propyl-2-furannonanoic acid;5-Heptyl-3-methyl-2-furanpentanoic acid;3-Methyl-5-pentyl-2-furanheptanoic acid;5-Pentyl-2-furanoctanoic acid;12-Hydroxyheptadeca-5,8,10-trienoic acid;2,6-Di-tert-butyl-4-ethylphenol;4-Ethyl-7,11-dimethyldodeca-trans-2-trans-6-1-o-trien-1-al;Nootkatol;(2R,6S,7S,10Z)-beta-Santala-3(15),10-dien-12-ol;Dihy…	71830	49753.1	61313.4	71979.8	54898.2	72840.2	30006.9	29093.9	26469.8	26141.5	22705.7	18957.9	44665.9	63769.1	25562.6	2.4946	up	2.58443e-06	5.71512e-05	1.5704
POS	POS_1175.97_6.8506	1175.97	6.8506	SM 33:0;2O/36:10	71.13	C74H131N2O6P	SM	Sphingomyelin	Ceramide phosphocholines (sphingomyelins) [SP0301]	Phosphosphingolipids [SP03]	Sphingolipids [SP]		2970.22	1275.72	4346.08	2881.99	4429.96	2173.54	1066.29	1173.11	913.923	1017.54	189.747	2865.65	2108.65	3012.92	1204.38	2.5016	up	0.0284692	0.0768876	1.43447
POS	POS_1288.1_7.4886	1288.1	7.4886	SM 76:10;O2	70.3	C81H143N2O7P	ASM	Acylsphingomyelin					8391.78	6440.73	8764.77	8063.19	13405.7	7251.34	3845.91	2809.98	2599.66	3014.93	3038.15	5595.97	6101.84	8719.58	3484.1	2.5027	up	0.000138423	0.0011951	1.52491
POS	POS_724.687_9.2483	724.687	9.2483	CE 22:1	100	C49H86O2	CE	Cholesteryl ester				DG(18:0/24:1(15Z)/0:0);DG(18:1(11Z)/24:0/0:0);DG(18:1(9Z)/24:0/0:0);DG(20:0/22:1(13Z)/0:0);DG(20:1(11Z)/22:0/0:0);DG(22:0/20:1(11Z)/0:0);DG(22:1(13Z)/20:0/0:0);DG(24:0/18:1(11Z)/0:0);DG(24:0/18:1(9Z)/0:0);DG(24:1(15Z)/18:0/0:0);DG(18:0/0:0/24:1n9);DG(20:0/0:0/22:1n9);DG(22:0/0:0/20:1n9);DG(24:0/0:0/18:1n7);DG(24:0/0:0/18:1n9)	22077.3	27984.2	20626.2	23894.7	22352	22265.8	3348.17	7780.18	7469.95	10966.5	13182.5	12838.2	16232.1	23200	9264.25	2.5043	up	0.00433463	0.017867	1.54058
POS	POS_972.794_8.0668	972.794	8.0668	"TG(20:4(8Z,11Z,14Z,17Z)/18:0/22:6(4Z,7Z,10Z,13Z,16Z,19Z))"	73.03	C63H102O6	TG	Triacylglycerol	Triacylglycerols [GL0301]	Triradylglycerols [GL03]	Glycerolipids [GL]	"TG(20:4(5Z,8Z,11Z,14Z)/18:1(9Z)/22:5(7Z,10Z,13Z,16Z,19Z));TG(22:5(7Z,10Z,13Z,16Z,19Z)/16:0/22:5(7Z,10Z,13Z,16Z,19Z));TG(16:0/22:4(7Z,10Z,13Z,16Z)/22:6(4Z,7Z,10Z,13Z,16Z,19Z));TG(16:0/22:5(4Z,7Z,10Z,13Z,16Z)/22:5(4Z,7Z,10Z,13Z,16Z));TG(16:0/22:5(4Z,7Z,10Z,13Z,16Z)/22:5(7Z,10Z,13Z,16Z,19Z));TG(16:0/22:5(7Z,10Z,13Z,16Z,19Z)/22:5(4Z,7Z,10Z,13Z,16Z));TG(16:0/22:5(7Z,10Z,13Z,16Z,19Z)/22:5(7Z,10Z,13Z,1…	910408	1.12817e+06	933729	908227	992574	1.04058e+06	275269	354710	408330	361064	492165	468060	689441	985615	393266	2.5062	up	3.17445e-05	0.000382099	1.59066
POS	POS_536.405_3.4197	536.405	3.4197	LPC O-20:1	72.18	C28H58NO6P	LPC	Lysophophatidylcholine				Vitamin E Nicotinate;12-Methyldocosanoylcarnitine;19-Methyldocosanoylcarnitine;21-Methyldocosanoylcarnitine;13-Methyldocosanoylcarnitine;9-Methyldocosanoylcarnitine;7-Methyldocosanoylcarnitine;17-Methyldocosanoylcarnitine;10-Methyldocosanoylcarnitine;5-Methyldocosanoylcarnitine;15-Methyldocosanoylcarnitine;6-Methyldocosanoylcarnitine;20-Methyldocosanoylcarnitine;16-Methyldocosanoylcarnitine;8-Met…	25321.2	22625.9	24157.4	27777.3	28944.3	26982.5	10579.3	9287.82	9502.74	9337.79	12975.6	9413.27	18075.4	25968.1	10182.7	2.5502	up	1.77996e-07	8.01506e-06	1.61577
POS	POS_782.713_8.2826	782.713	8.2826	TG 13:0_16:0_16:0	100	C48H92O6	TG	Triacylglycerol					52642.6	86175.7	58423.6	45192.1	106804	59445.6	20678.6	22346.1	23249.5	25373.1	44376.8	23914.9	47385.2	68113.9	26656.5	2.5552	up	0.000349685	0.00248323	1.51
POS	POS_610.368_2.3337	610.368	2.3337	2-O-Glutaroyl-1-O-palmitoyl-sn-glycero-3-phosphocholine	92.65	C29H56NO10P			Oxidized glycerophosphocholines [GP2001]	Oxidized glycerophospholipids [GP20]	Glycerophospholipids [GP]	2-O-Glutaroyl-1-O-palmitoyl-sn-glycero-3-phosphocholine;3-(N-n-Octadecylcarbamoyloxy)-2-methoxypropyl-2-thiazolinium ethyl phosphate	5288.31	7702.1	11701.9	2141.13	7632.57	8242.86	920.961	1741.28	4194.11	2666.51	1947.41	5154.17	4944.44	7118.14	2770.74	2.569	up	0.019206	0.0565792	1.3582
POS	POS_777.559_6.3849	777.559	6.3849	"SM(d17:1/22:6(5Z,7Z,10Z,13Z,16Z,19Z)-OH(4))"	70.75	C44H77N2O7P	SM	Sphingomyelin	Ceramide phosphocholines (sphingomyelins) [SP0301]	Phosphosphingolipids [SP03]	Sphingolipids [SP]	"PG(18:0/18:1(11Z));PG(18:0/18:1(9Z));PG(18:1(11Z)/18:0);PG(18:1(9Z)/18:0);PA(21:0/18:1(12Z)-2OH(9,10));PA(18:1(12Z)-2OH(9,10)/21:0);PA(a-21:0/18:1(12Z)-2OH(9,10));PA(18:1(12Z)-2OH(9,10)/a-21:0);PA(i-21:0/18:1(12Z)-2OH(9,10));PA(18:1(12Z)-2OH(9,10)/i-21:0);SM(d17:1/22:6(5Z,7Z,10Z,13Z,16Z,19Z)-OH(4));SM(d17:1/22:6(4Z,8Z,10Z,13Z,16Z,19Z)-OH(7));SM(d17:1/22:6(4Z,7Z,10Z,12E,16Z,19Z)-OH(14));SM(d17:1/…	86857.3	83446.5	95339	86881.8	139769	90928.7	37041.3	36486.8	38235.7	42195.7	16300.4	54164.4	67303.9	97203.7	37404.1	2.5987	up	0.000904031	0.00520285	1.56669
POS	POS_718.635_8.7104	718.635	8.7104	CE 22:4	82.33	C49H80O2	CE	Cholesteryl ester				"DG(18:3(6Z,9Z,12Z)/24:1(15Z)/0:0);DG(18:3(9Z,12Z,15Z)/24:1(15Z)/0:0);DG(18:4(6Z,9Z,12Z,15Z)/24:0/0:0);DG(20:0/22:4(7Z,10Z,13Z,16Z)/0:0);DG(20:2(11Z,14Z)/22:2(13Z,16Z)/0:0);DG(20:3(5Z,8Z,11Z)/22:1(13Z)/0:0);DG(20:3(8Z,11Z,14Z)/22:1(13Z)/0:0);DG(20:4(5Z,8Z,11Z,14Z)/22:0/0:0);DG(20:4(8Z,11Z,14Z,17Z)/22:0/0:0);DG(22:0/20:4(5Z,8Z,11Z,14Z)/0:0);DG(22:0/20:4(8Z,11Z,14Z,17Z)/0:0);DG(22:1(13Z)/20:3(5Z,8Z…	91103.2	66988	90518.5	106129	187329	130100	18649	24629.2	58306.9	37525.7	81258.1	33601.9	77178.2	112028	42328.5	2.6466	up	0.00369176	0.0157436	1.52144
POS	POS_958.743_7.4805	958.743	7.4805	ASG 27:1;O;Hex;FA 28:7	100	C61H96O7	AHexCS	Acylhexosyl cholesterol				PS(24:0/24:1(15Z));PS(24:1(15Z)/24:0)	8705.3	8676.99	9949.2	8582.5	13803.8	10464.9	4083.96	4283.09	4311.85	4497.51	2380.75	3096.89	6903.06	10030.5	3775.67	2.6566	up	2.64181e-05	0.00033105	1.61084
POS	POS_848.608_6.244	848.608	6.244	PC 19:2_22:4	76.93	C49H86NO8P	PC	Phosphatidylcholine	Diacylglycerophosphocholines [GP0101]	Glycerophosphocholines [GP01]	Glycerophospholipids [GP]	"PE(20:5(5Z,8Z,11Z,14Z,17Z)/24:1(15Z));PE(22:0/22:6(4Z,7Z,10Z,13Z,16Z,19Z));PE(22:1(13Z)/22:5(4Z,7Z,10Z,13Z,16Z));PE(22:1(13Z)/22:5(7Z,10Z,13Z,16Z,19Z));PE(22:2(13Z,16Z)/22:4(7Z,10Z,13Z,16Z));PE(22:4(7Z,10Z,13Z,16Z)/22:2(13Z,16Z));PE(22:5(4Z,7Z,10Z,13Z,16Z)/22:1(13Z));PE(22:5(7Z,10Z,13Z,16Z,19Z)/22:1(13Z));PE(22:6(4Z,7Z,10Z,13Z,16Z,19Z)/22:0);PE(24:1(15Z)/20:5(5Z,8Z,11Z,14Z,17Z));PE-NMe2(20:0/22:…	33808.8	26209.6	50317.7	30904.2	117036	59430.7	23209.2	16962.1	13785.9	20331.3	25242.2	19840.7	36423.2	52951.2	19895.2	2.6615	up	0.0104118	0.0352228	1.3507
POS	POS_784.575_3.0584	784.575	3.0584	PC 18:0_18:3	100	C44H82NO8P	PC	Phosphatidylcholine				PC(14:0/20:0);PC(16:0/18:0);PC(18:0/16:0);PC(20:0/14:0);PE(15:0/22:0);PE(22:0/15:0);PE-NMe(18:0/18:0);PE-NMe(14:0/22:0);PE-NMe(16:0/20:0);PE-NMe(20:0/16:0);PE-NMe(22:0/14:0);PE-NMe2(15:0/20:0);PE-NMe2(20:0/15:0)	4290.9	2691.67	3518.23	3235.71	4584.99	2436.09	874.355	725.836	1306.46	1129.16	2609.25	1103.51	2375.51	3459.6	1291.43	2.6789	up	0.000993522	0.00561322	1.59268
NEG	NEG_1544.08_5.7882	1544.08	5.7882	CL 41:2_38:7	74.4	C88H154O17P2	CL	Cardiolipin				"SM(d16:1/PGF2alpha);SM(d16:1/PGE1);SM(d16:1/PGD1);SM(d16:2(4E,8Z)/PGF1alpha);SM(d18:1/5-iso PGF2VI);CL(14:0/18:2(9Z,11Z)/18:2(9Z,11Z)/25:0);CL(14:0/18:2(9Z,11Z)/18:2(9Z,11Z)/a-25:0);CL(i-14:0/18:2(9Z,11Z)/18:2(9Z,11Z)/25:0);CL(i-14:0/18:2(9Z,11Z)/18:2(9Z,11Z)/a-25:0);CL(15:0/18:2(9Z,11Z)/18:2(9Z,11Z)/24:0);CL(15:0/18:2(9Z,11Z)/18:2(9Z,11Z)/i-24:0);CL(a-15:0/18:2(9Z,11Z)/18:2(9Z,11Z)/24:0);CL(a-1…	5332.39	5187.1	5792.53	5625.24	4301.49	6521.47	2234.76	2253.32	1926.58	2253.47	1890.85	1656.57	3747.98	5460.04	2035.92	2.6818	up	1.62761e-07	7.4821e-06	1.64847
POS	POS_1186.01_6.8506	1186.01	6.8506	SM 42:4;2O(FA 26:1)	79.86	C73H137N2O7P	SM	Sphingomyelin	Ceramide phosphocholines (sphingomyelins) [SP0301]	Phosphosphingolipids [SP03]	Sphingolipids [SP]	"DG(14:0/20:2(11Z,14Z)/0:0);DG(14:1(9Z)/20:1(11Z)/0:0);DG(16:0/18:2(9Z,12Z)/0:0);DG(16:1(9Z)/18:1(11Z)/0:0);DG(16:1(9Z)/18:1(9Z)/0:0);DG(18:1(11Z)/16:1(9Z)/0:0);DG(18:1(9Z)/16:1(9Z)/0:0);DG(18:2(9Z,12Z)/16:0/0:0);DG(20:1(11Z)/14:1(9Z)/0:0);DG(20:2(11Z,14Z)/14:0/0:0);cis-Uvariamicin IB;Reticulatain 2;cis-Uvariamicin IV;Neoreticulatacin A;DG(14:0/0:0/20:2n6);DG(15:0/0:0/18:2n6);DG(14:1n5/0:0/20:1n9…	5368.98	1637.65	8612.11	5498.65	14620.6	6614.77	2510.29	2351.56	2060.84	3089.41	979.746	4707.09	4837.64	7058.79	2616.49	2.6978	up	0.0341296	0.0888255	1.27143
POS	POS_948.793_8.2562	948.793	8.2562	"TG(18:2(9Z,12Z)/18:1(11Z)/22:5(7Z,10Z,13Z,16Z,19Z))"	76.23	C61H102O6	TG	Triacylglycerol	Triacylglycerols [GL0301]	Triradylglycerols [GL03]	Glycerolipids [GL]	"TG(18:0/20:4(5Z,8Z,11Z,14Z)/20:4(5Z,8Z,11Z,14Z));TG(18:1(9Z)/18:1(9Z)/22:6(4Z,7Z,10Z,13Z,16Z,19Z));TG(18:2(9Z,12Z)/18:0/22:6(4Z,7Z,10Z,13Z,16Z,19Z));TG(18:2(9Z,12Z)/18:1(9Z)/22:5(7Z,10Z,13Z,16Z,19Z));TG(18:2(9Z,12Z)/18:2(9Z,12Z)/22:4(7Z,10Z,13Z,16Z));TG(14:0/22:2(13Z,16Z)/22:6(4Z,7Z,10Z,13Z,16Z,19Z));TG(14:0/22:4(7Z,10Z,13Z,16Z)/22:4(7Z,10Z,13Z,16Z));TG(14:0/22:6(4Z,7Z,10Z,13Z,16Z,19Z)/22:2(13Z,…	2.93627e+06	3.54271e+06	2.67032e+06	2.36234e+06	2.74663e+06	3.39561e+06	615871	1.88544e+06	1.23823e+06	1.15686e+06	889380	757095	2.0164e+06	2.94231e+06	1.09048e+06	2.6982	up	0.000719893	0.00435175	1.62551
POS	POS_940.891_9.334	940.891	9.334	CE 38:5	93.3	C65H110O2	CE	Cholesteryl ester					11715.3	15873.6	10617.6	12852.6	17375	13329.8	684.782	3897.09	4059.45	4360.61	7926.57	9271.7	9330.35	13627.3	5033.37	2.7074	up	0.0212533	0.0612193	1.58384
POS	POS_682.631_8.7566	682.631	8.7566	CE 19:1	78.92	C46H80O2	CE	Cholesteryl ester				DG(15:0/24:1(15Z)/0:0);DG(24:1(15Z)/15:0/0:0);DG(15:0/0:0/24:1n9)	21064.9	19224.7	22128.5	65059.8	18147	19914	6736.6	7425.09	12522.9	11835.9	3134.29	19274	18872.3	27589.8	10154.8	2.7169	up	0.0110771	0.0368939	1.43887
POS	POS_1172.01_7.4766	1172.01	7.4766	SM 67:5;O2	88.7	C72H135N2O7P	ASM	Acylsphingomyelin					16146.1	10885	15077.6	14385.6	17782.4	14031.1	4449.53	5525.12	5608.91	5268.62	3435.33	8070.63	10055.5	14718	5393.03	2.7291	up	5.55392e-05	0.000589908	1.64232
POS	POS_804.669_7.3674	804.669	7.3674	LPC 38:0-SN1	74.85	C46H94NO7P	LPC	Lysophophatidylcholine	Monoacylglycerophosphocholines [GP0105]	Glycerophosphocholines [GP01]	Glycerophospholipids [GP]		64331.2	101961	52044.5	60625.9	46080.2	73543.8	25914.1	22859.3	24711.2	23950.8	29616.5	18710.2	45362.4	66431.1	24293.7	2.7345	up	7.86432e-05	0.000779323	1.60608
POS	POS_1263.13_7.1937	1263.13	7.1937	PC 70:2	71	C78H152NO8P	PC	Phosphatidylcholine					4934.64	4544.45	5698.26	5560.61	9533.84	4427.47	2312.31	1713.72	1844	2322.28	2325.96	2144.08	3946.8	5783.21	2110.39	2.7403	up	0.000108269	0.000992252	1.60309
POS	POS_978.832_8.4611	978.832	8.4611	TG 18:1_20:2_22:4	100	C63H108O6	TG	Triacylglycerol					177773	171407	175208	182515	299180	183188	47637.5	61597.6	58101.1	54363.8	83497.1	128059	135211	198212	72209.3	2.745	up	0.000270246	0.00201689	1.62617
POS	POS_884.719_7.4498	884.719	7.4498	PC 22:0_21:2	73.44	C51H98NO8P	PC	Phosphatidylcholine	Diacylglycerophosphocholines [GP0101]	Glycerophosphocholines [GP01]	Glycerophospholipids [GP]	"PE(22:1(13Z)/24:1(15Z));PE(22:2(13Z,16Z)/24:0);PE(24:0/22:2(13Z,16Z));PE(24:1(15Z)/22:1(13Z));PE-NMe2(20:1(11Z)/24:1(15Z));PE-NMe2(20:2(11Z,14Z)/24:0);PE-NMe2(22:0/22:2(13Z,16Z));PE-NMe2(22:1(13Z)/22:1(13Z));PE-NMe2(22:2(13Z,16Z)/22:0);PE-NMe2(24:0/20:2(11Z,14Z));PE-NMe2(24:1(15Z)/20:1(11Z))"	59440.5	86455.9	63721.2	71572.6	55654.5	68398.6	21577.9	21828.7	25133.3	22391.4	38539.1	17998	46059.3	67540.5	24578.1	2.748	up	2.71798e-05	0.000338956	1.65763
POS	POS_862.619_6.4111	862.619	6.4111	PC(PGF1alpha/18:0)	72.1	C46H88NO11P	PC	Phosphatidylcholine	Diacylglycerophosphocholines [GP0101]	Glycerophosphocholines [GP01]	Glycerophospholipids [GP]	"Galabiosylceramide (d18:1/16:0);LacCer(d18:1/16:0);PC(18:0/PGF1alpha);PC(PGF1alpha/18:0);PA(a-25:0/5-iso PGF2VI);PA(5-iso PGF2VI/a-25:0);PG(i-20:0/20:3(6,8,11)-OH(5));PG(20:3(6,8,11)-OH(5)/i-20:0);PG(i-22:0/18:2(10E,12Z)+=O(9));PG(18:2(10E,12Z)+=O(9)/i-22:0);PG(i-22:0/18:2(9Z,11E)+=O(13));PG(18:2(9Z,11E)+=O(13)/i-22:0);PG(i-22:0/18:3(10,12,15)-OH(9));PG(18:3(10,12,15)-OH(9)/i-22:0);PG(i-22:0/18:…	65949.8	67370.9	70938.9	41609	80454.7	37593.8	29585.6	28346.9	1912.18	24555	27515.1	20408.1	41353.3	60652.8	22053.8	2.7502	up	0.0346515	0.089895	1.52664
POS	POS_818.592_5.9864	818.592	5.9864	PC(P-16:0/PGF1alpha)	80.22	C44H84NO10P	PC	Phosphatidylcholine	Diacylglycerophosphocholines [GP0101]	Glycerophosphocholines [GP01]	Glycerophospholipids [GP]	"PS(14:0/24:1(15Z));PS(14:1(9Z)/24:0);PS(16:0/22:1(13Z));PS(16:1(9Z)/22:0);PS(18:0/20:1(11Z));PS(18:1(11Z)/20:0);PS(18:1(9Z)/20:0);PS(20:0/18:1(11Z));PS(20:0/18:1(9Z));PS(20:1(11Z)/18:0);PS(22:0/16:1(9Z));PS(22:1(13Z)/16:0);PS(24:0/14:1(9Z));PS(24:1(15Z)/14:0);PC(18:1(11Z)/18:1(12Z)-2OH(9,10));PC(18:1(12Z)-2OH(9,10)/18:1(11Z));PC(18:1(9Z)/18:1(12Z)-2OH(9,10));PC(18:1(12Z)-2OH(9,10)/18:1(9Z));PC(P…	539534	561666	561085	574597	462674	565130	223346	226504	229350	216841	99812.9	183495	370336	544114	196558	2.7682	up	0.000339426	0.00242033	1.66393
POS	POS_807.631_6.0952	807.631	6.0952	SM 23:3;2O/19:2	82.95	C47H87N2O6P	SM	Sphingomyelin	Ceramide phosphocholines (sphingomyelins) [SP0301]	Phosphosphingolipids [SP03]	Sphingolipids [SP]	"N-Palmitoyl phenylalanine;N-Arachidonoyl Valine;SM(d16:1/24:1(15Z));SM(d18:1/22:1(13Z));SM(d18:2(4E,14Z)/22:0)"	37578.7	45511.7	43523.2	42186.4	97103.5	46173.1	14904	19761.2	19857.6	20799.3	10859.9	24670.7	35244.1	52012.8	18475.4	2.8152	up	0.00028238	0.0020894	1.57864
POS	POS_660.587_6.8155	660.587	6.8155	Cer 18:1;O2/24:3;O	100	C42H77NO4	Cer_HS	Ceramide hydroxy fatty acid-sphingosine					40240.4	53152.5	44415	48582.7	52845.9	43458.2	16456.9	16588.7	18834.2	15734.6	17965.6	13793.4	31839	47115.8	16562.2	2.8448	up	1.54248e-08	1.49782e-06	1.70761
POS	POS_973.718_7.7893	973.718	7.7893	TG 20:4_20:4_20:4	100	C63H98O6	TG	Triacylglycerol				"TG(20:4(5Z,8Z,11Z,14Z)/20:4(5Z,8Z,11Z,14Z)/20:4(5Z,8Z,11Z,14Z));TG(18:3(9Z,12Z,15Z)/20:4(5Z,8Z,11Z,14Z)/22:5(7Z,10Z,13Z,16Z,19Z));TG(20:4(5Z,8Z,11Z,14Z)/18:2(9Z,12Z)/22:6(4Z,7Z,10Z,13Z,16Z,19Z));TG(20:5(5Z,8Z,11Z,14Z,17Z)/18:1(9Z)/22:6(4Z,7Z,10Z,13Z,16Z,19Z));TG(20:5(5Z,8Z,11Z,14Z,17Z)/18:2(9Z,12Z)/22:5(7Z,10Z,13Z,16Z,19Z));TG(16:0/22:6(4Z,7Z,10Z,13Z,16Z,19Z)/22:6(4Z,7Z,10Z,13Z,16Z,19Z));TG(16:1…	25063.7	16155.9	28705.9	24699	26601	29055.3	5670.26	6916.32	7430.53	7916.99	6099.22	18714.2	16919	25046.8	8791.26	2.8491	up	0.000637513	0.00396374	1.66957
POS	POS_658.534_6.2146	658.534	6.2146	DG 18:2_20:4	100	C41H68O5	DG	Diacylglycerol				"DG(16:0/22:6(4Z,7Z,10Z,13Z,16Z,19Z)/0:0);DG(16:1(9Z)/22:5(4Z,7Z,10Z,13Z,16Z)/0:0);DG(16:1(9Z)/22:5(7Z,10Z,13Z,16Z,19Z)/0:0);DG(18:1(11Z)/20:5(5Z,8Z,11Z,14Z,17Z)/0:0);DG(18:1(9Z)/20:5(5Z,8Z,11Z,14Z,17Z)/0:0);DG(18:2(9Z,12Z)/20:4(5Z,8Z,11Z,14Z)/0:0);DG(18:2(9Z,12Z)/20:4(8Z,11Z,14Z,17Z)/0:0);DG(18:3(6Z,9Z,12Z)/20:3(5Z,8Z,11Z)/0:0);DG(18:3(6Z,9Z,12Z)/20:3(8Z,11Z,14Z)/0:0);DG(18:3(9Z,12Z,15Z)/20:3(5Z…	33055.1	35109.5	43876	46640.3	53015.8	29439.7	9185.69	14890.6	14183.1	13318.4	10766.9	21976.5	27121.5	40189.4	14053.5	2.8597	up	5.58097e-05	0.000592296	1.66196
POS	POS_886.742_7.8796	886.742	7.8796	TG 16:0_18:2_18:3;O	100	C55H96O7	OxTG	Oxidized triglyceride				1-O-(6-Acetamido-6-deoxy-alpha-D-galactosyl)-N-[(15Z)-tetracos-15-enoyl]phytosphingosine	350403	414139	278209	318065	297696	400361	80030.9	105459	123476	115698	179627	112275	231287	343146	119428	2.8732	up	2.13933e-05	0.000282271	1.69347
POS	POS_806.715_8.1075	806.715	8.1075	TG 13:0_16:1_18:1	100	C50H92O6	TG	Triacylglycerol				SM(d18:0/22:0)	274199	377275	281909	298106	163390	304624	67313.9	76778.2	84612.8	75992.9	163734	123024	190913	283251	98576	2.8734	up	0.000161384	0.0013493	1.6475
POS	POS_885.668_7.9467	885.668	7.9467	SM 48:8;O2	80.1	C53H93N2O6P	SM	Sphingomyelin				"2,3-Diacetoxypropyl stearate;Ensorb;PE(24:0/20:3(5Z,8Z,11Z)-O(14R,15S));PE(20:3(5Z,8Z,11Z)-O(14R,15S)/24:0);PE(24:0/20:3(5Z,8Z,14Z)-O(11S,12R));PE(20:3(5Z,8Z,14Z)-O(11S,12R)/24:0);PE(24:0/20:3(5Z,11Z,14Z)-O(8,9));PE(20:3(5Z,11Z,14Z)-O(8,9)/24:0);PE(24:0/20:3(8Z,11Z,14Z)-O(5,6));PE(20:3(8Z,11Z,14Z)-O(5,6)/24:0);PE(24:0/20:4(5Z,8Z,11Z,14Z)-OH(20));PE(20:4(5Z,8Z,11Z,14Z)-OH(20)/24:0);PE(24:0/20:4(6…	12984.9	6665.87	14284.1	12532	30461.9	13409	2173.44	1220.3	4704.11	4521.51	6621.39	12198.2	10148.1	15056.3	5239.83	2.8734	up	0.0139745	0.0443145	1.55066
POS	POS_910.686_6.9242	910.686	6.9242	TG 15:4_15:4_22:1;O3	95.4	C55H88O9	OxTG	Oxidized triglyceride				"PC(24:0/20:3(5Z,8Z,11Z)-O(14R,15S));PC(20:3(5Z,8Z,11Z)-O(14R,15S)/24:0);PC(24:0/20:3(5Z,8Z,14Z)-O(11S,12R));PC(20:3(5Z,8Z,14Z)-O(11S,12R)/24:0);PC(24:0/20:3(5Z,11Z,14Z)-O(8,9));PC(20:3(5Z,11Z,14Z)-O(8,9)/24:0);PC(24:0/20:3(8Z,11Z,14Z)-O(5,6));PC(20:3(8Z,11Z,14Z)-O(5,6)/24:0);PC(24:0/20:4(5Z,8Z,11Z,14Z)-OH(20));PC(20:4(5Z,8Z,11Z,14Z)-OH(20)/24:0);PC(24:0/20:4(6E,8Z,11Z,14Z)-OH(5S));PC(20:4(6E,8Z,…	16298.8	15457.1	18327.9	16369.4	13083.9	16452.7	7960.14	6641.69	7975	3117.8	2159.68	5394.61	10769.9	15998.3	5541.49	2.887	up	0.00278496	0.0126527	1.67838
POS	POS_864.641_6.5208	864.641	6.5208	PC 20:1_22:4	83.3	C50H90NO8P	PC	Phosphatidylcholine	Diacylglycerophosphocholines [GP0101]	Glycerophosphocholines [GP01]	Glycerophospholipids [GP]	"PC(18:4(6Z,9Z,12Z,15Z)/24:1(15Z));PC(20:0/22:5(4Z,7Z,10Z,13Z,16Z));PC(20:0/22:5(7Z,10Z,13Z,16Z,19Z));PC(20:1(11Z)/22:4(7Z,10Z,13Z,16Z));PC(20:3(5Z,8Z,11Z)/22:2(13Z,16Z));PC(20:3(8Z,11Z,14Z)/22:2(13Z,16Z));PC(20:4(5Z,8Z,11Z,14Z)/22:1(13Z));PC(20:4(8Z,11Z,14Z,17Z)/22:1(13Z));PC(20:5(5Z,8Z,11Z,14Z,17Z)/22:0);PC(22:0/20:5(5Z,8Z,11Z,14Z,17Z));PC(22:1(13Z)/20:4(5Z,8Z,11Z,14Z));PC(22:1(13Z)/20:4(8Z,11Z…	245753	369744	290872	291569	261029	295392	78026.5	91435.3	101074	96277.1	95961.7	143956	196757	292393	101122	2.8915	up	2.32626e-06	5.27672e-05	1.708
POS	POS_808.73_8.2953	808.73	8.2953	TG 13:0_16:0_18:1	100	C50H94O6	TG	Triacylglycerol					167311	217786	164791	177326	245964	184485	48734.2	51328	56154.8	71334.7	106151	66551.7	129826	192944	66709.1	2.8923	up	4.36687e-05	0.000486814	1.6987
POS	POS_976.821_8.3447	976.821	8.3447	TG 18:1_20:3_22:4	100	C63H106O6	TG	Triacylglycerol					359880	401236	404565	432431	584313	434110	122135	143478	92577.9	157876	101935	279928	292872	436089	149655	2.914	up	0.000430155	0.00291725	1.69704
POS	POS_909.664_7.4548	909.664	7.4548	SM 49:10;O2	79.2	C54H89N2O7P	ASM	Acylsphingomyelin				"27-Norcholestanehexol;PA(24:0/24:1(15Z));PA(24:1(15Z)/24:0);PE(24:0/22:6(5Z,7Z,10Z,13Z,16Z,19Z)-OH(4));PE(22:6(5Z,7Z,10Z,13Z,16Z,19Z)-OH(4)/24:0);PE(24:0/22:6(4Z,8Z,10Z,13Z,16Z,19Z)-OH(7));PE(22:6(4Z,8Z,10Z,13Z,16Z,19Z)-OH(7)/24:0);PE(24:0/22:6(4Z,7Z,10Z,12E,16Z,19Z)-OH(14));PE(22:6(4Z,7Z,10Z,12E,16Z,19Z)-OH(14)/24:0);PE(24:0/22:6(4Z,7Z,10Z,13E,15E,19Z)-OH(17));PE(22:6(4Z,7Z,10Z,13E,15E,19Z)-OH(…	20401	27878.2	23922.8	22205.1	21652.8	26234.1	6659.32	7226.33	5899.34	6332.55	10615.2	11866.1	15907.7	23715.7	8099.8	2.9279	up	7.70944e-05	0.000767894	1.71732
POS	POS_379.28_3.3432	379.28	3.3432	Monoolein	70.47	C21H40O4	MG	Monoacylglycerol	Monoacylglycerols [GL0101]	Monoradylglycerols [GL01]	Glycerolipids [GL]	"Diethylaminoethyl-Sephacel;MG(0:0/18:1(11Z)/0:0);MG(0:0/18:1(9Z)/0:0);MG(18:1(11Z)/0:0/0:0);MG(18:1(9Z)/0:0/0:0);Stearoyllactic acid;3-(2-Heptenyloxy)-2-hydroxypropyl undecanoate;1,3-Dihydroxypropan-2-yl oleate;Monoelaidin;1,2,3-Trihydroxyhenicos-12-en-4-one"	31514.3	29164.8	32850.3	34428.5	29478.7	33345.7	13487.1	10102.5	12505.1	12211	7281.14	9214.57	21298.7	31797.1	10800.2	2.9441	up	3.67992e-05	0.000426315	1.73303
POS	POS_528.494_5.3858	528.494	5.3858	DG O-15:0_14:1	100	C32H62O4	EtherDG	Ether-linked diacylglycerol				Gallamine Triethiodide;Propylene glycol mono- and diesters of fats and fatty acids;Nb-Lignoceroyltryptamine;FAHFA(16:0/9-O-16:0);FAHFA(16:0/5-O-16:0);FAHFA(16:0/7-O-16:0);FAHFA(16:0/8-O-16:0);FAHFA(16:0/10-O-16:0);FAHFA(16:0/11-O-16:0);FAHFA(16:0/12-O-16:0);FAHFA(16:0/13-O-16:0);FAHFA(16:0/6-O-16:0)	4978.26	3378.49	4662.87	3837.9	3458.84	5143.71	1823.65	1039.53	991.019	1185.16	840.161	2741.84	2840.12	4243.35	1436.89	2.9531	up	0.000724942	0.00437819	1.70218
POS	POS_950.655_2.9899	950.655	2.9899	PC 49:11	78.1	C57H92NO8P	PC	Phosphatidylcholine				"PC(24:0/20:3(6,8,11)-OH(5));PC(20:3(6,8,11)-OH(5)/24:0)"	3079.95	1013.02	4749.94	2839.34	2178.03	3543.44	1094.56	1237.55	859.867	910.138	801.752	946.773	1937.86	2900.62	975.105	2.9747	up	0.00470304	0.0190568	1.5199
POS	POS_682.536_6.097	682.536	6.097	DG 20:4_20:4	100	C43H68O5	DG	Diacylglycerol				"3-octaprenyl-4-hydroxybenzoate;DG(18:2(9Z,12Z)/22:6(4Z,7Z,10Z,13Z,16Z,19Z)/0:0);DG(18:3(6Z,9Z,12Z)/22:5(4Z,7Z,10Z,13Z,16Z)/0:0);DG(18:3(6Z,9Z,12Z)/22:5(7Z,10Z,13Z,16Z,19Z)/0:0);DG(18:3(9Z,12Z,15Z)/22:5(4Z,7Z,10Z,13Z,16Z)/0:0);DG(18:3(9Z,12Z,15Z)/22:5(7Z,10Z,13Z,16Z,19Z)/0:0);DG(18:4(6Z,9Z,12Z,15Z)/22:4(7Z,10Z,13Z,16Z)/0:0);DG(20:3(5Z,8Z,11Z)/20:5(5Z,8Z,11Z,14Z,17Z)/0:0);DG(20:3(8Z,11Z,14Z)/20:5(…	15652.8	10507.1	17274.3	17132.9	24114.5	16136	3962.64	3781.28	6943.22	4976.66	4686.71	9104.52	11189.4	16802.9	5575.84	3.0135	up	0.000105633	0.000973255	1.69232
POS	POS_1000.82_8.2588	1000.82	8.2588	TG 20:3_20:3_22:4	100	C65H106O6	TG	Triacylglycerol					98918.6	91236.3	85539	97567.2	104066	104289	18547.7	21971	29420.5	30697.6	35943.3	55290.5	64457.3	96936.1	31978.4	3.0313	up	0.000529171	0.00343425	1.74641
POS	POS_768.513_4.1186	768.513	4.1186	"PC(14:1(9Z)/20:4(5Z,8Z,11Z,14Z)-OH(16R))"	71.41	C42H74NO9P	PC	Phosphatidylcholine	Diacylglycerophosphocholines [GP0101]	Glycerophosphocholines [GP01]	Glycerophospholipids [GP]	"PC(14:0/20:4(6E,8Z,11Z,14Z)+=O(5));PC(20:4(6E,8Z,11Z,14Z)+=O(5)/14:0);PC(14:0/20:4(5Z,8Z,11Z,13E)+=O(15));PC(20:4(5Z,8Z,11Z,13E)+=O(15)/14:0);PC(14:0/20:5(5Z,8Z,11Z,14Z,16E)-OH(18R));PC(20:5(5Z,8Z,11Z,14Z,16E)-OH(18R)/14:0);PC(14:0/20:5(5Z,8Z,11Z,14Z,16E)-OH(18));PC(20:5(5Z,8Z,11Z,14Z,16E)-OH(18)/14:0);PC(14:0/20:5(5Z,8Z,10E,14Z,17Z)-OH(12));PC(20:5(5Z,8Z,10E,14Z,17Z)-OH(12)/14:0);PC(14:0/20:5(6…	2915.03	6852.43	5729.21	1814.19	4379.63	3197.92	413.173	407.704	714.767	617.873	4622.52	1399.09	2755.3	4148.07	1362.52	3.0444	up	0.0102633	0.0348385	1.74247
POS	POS_872.643_6.7494	872.643	6.7494	PC 44:8e	76	C52H90NO7P	PC	Phosphatidylcholine	Diacylglycerophosphocholines [GP0101]	Glycerophosphocholines [GP01]	Glycerophospholipids [GP]	"PS(18:1(11Z)/24:1(15Z));PS(18:1(9Z)/24:1(15Z));PS(18:2(9Z,12Z)/24:0);PS(20:0/22:2(13Z,16Z));PS(20:1(11Z)/22:1(13Z));PS(20:2(11Z,14Z)/22:0);PS(22:0/20:2(11Z,14Z));PS(22:1(13Z)/20:1(11Z));PS(22:2(13Z,16Z)/20:0);PS(24:0/18:2(9Z,12Z));PS(24:1(15Z)/18:1(11Z));PS(24:1(15Z)/18:1(9Z));PC(20:0/20:3(8Z,11Z,14Z)-2OH(5,6));PC(20:3(8Z,11Z,14Z)-2OH(5,6)/20:0);PC(22:2(13Z,16Z)/18:1(12Z)-2OH(9,10));PC(18:1(12Z)…	15081.9	14942.6	22093.3	18564.2	30372.9	21419.7	5290.37	7849.37	8583.07	5530.49	1583.71	11298	13550.8	20412.4	6689.16	3.0516	up	0.00540129	0.0212736	1.67481
POS	POS_376.317_2.5371	376.317	2.5371	NAE 22:4	100	C24H41NO2	NAE	N-acyl ethanolamines					4470.78	5747.04	4786.79	3245.91	5902.91	3084.48	1096.72	1500.13	1674.16	1681.54	1653.79	1193.77	3003.17	4539.65	1466.69	3.0952	up	2.19772e-05	0.000288361	1.71675
POS	POS_374.301_2.5764	374.301	2.5764	NAE 22:5	100	C24H39NO2	NAE	N-acyl ethanolamines				N-Myristoyl Glutamine	3688.77	3500.44	2525.72	2191.65	1187.67	1200.07	154.722	384.136	523.646	1280.76	179.526	2068.75	1573.82	2382.39	765.258	3.1132	up	0.0160517	0.0494299	1.7198
POS	POS_946.904_9.3229	946.904	9.3229	TG 21:0_18:1_18:1	100	C60H112O6	TG	Triacylglycerol					8898.24	13130.8	9064.64	9934.5	24286.8	10635.6	2280.67	2595.32	4374.21	4909.72	6452.64	3720.9	8357	12658.4	4055.58	3.1212	up	0.000485175	0.00320488	1.65319
POS	POS_766.532_5.9078	766.532	5.9078	PC 19:2_16:3	71.99	C43H76NO8P	PC	Phosphatidylcholine	Diacylglycerophosphocholines [GP0101]	Glycerophosphocholines [GP01]	Glycerophospholipids [GP]	"PC(15:0/20:5(5Z,8Z,11Z,14Z,17Z));PC(20:5(5Z,8Z,11Z,14Z,17Z)/15:0);PE(16:0/22:5(4Z,7Z,10Z,13Z,16Z));PE(16:0/22:5(7Z,10Z,13Z,16Z,19Z));PE(16:1(9Z)/22:4(7Z,10Z,13Z,16Z));PE(18:0/20:5(5Z,8Z,11Z,14Z,17Z));PE(18:1(11Z)/20:4(5Z,8Z,11Z,14Z));PE(18:1(11Z)/20:4(8Z,11Z,14Z,17Z));PE(18:1(9Z)/20:4(5Z,8Z,11Z,14Z));PE(18:1(9Z)/20:4(8Z,11Z,14Z,17Z));PE(18:2(9Z,12Z)/20:3(5Z,8Z,11Z));PE(18:2(9Z,12Z)/20:3(8Z,11Z,1…	31661	13391.1	35124.4	46420.6	21453	37520.5	3092.26	5144.88	5215.55	8786.68	3217.94	33951.9	20415	30928.4	9901.53	3.1236	up	0.00776342	0.028116	1.77946
POS	POS_910.742_7.7201	910.742	7.7201	TG 18:2_18:2_18:3;O	100	C57H96O7	OxTG	Oxidized triglyceride					139608	206824	124324	140917	177050	145652	37570.2	41792.7	47614	46322.6	63999.4	58035	102476	155729	49222.3	3.1638	up	1.19093e-06	3.19972e-05	1.77137
POS	POS_793.627_3.3735	793.627	3.3735	SM 41:5;O2	92.9	C46H85N2O6P	SM	Sphingomyelin				"TG(14:1(9Z)/14:1(9Z)/20:5(5Z,8Z,11Z,14Z,17Z));TG(14:1(9Z)/20:5(5Z,8Z,11Z,14Z,17Z)/14:1(9Z));Cholesterol cholate;TG(14:0/14:0/18:4(6Z,9Z,12Z,15Z));TG(14:0/14:1(9Z)/18:3(6Z,9Z,12Z));TG(14:0/14:1(9Z)/18:3(9Z,12Z,15Z));TG(14:0/18:3(6Z,9Z,12Z)/14:1(9Z));TG(14:0/18:3(9Z,12Z,15Z)/14:1(9Z));TG(14:0/18:4(6Z,9Z,12Z,15Z)/14:0);TG(14:1(9Z)/14:0/18:3(6Z,9Z,12Z));TG(14:1(9Z)/14:0/18:3(9Z,12Z,15Z));TG(14:1(9Z)…	9969.84	2376.4	8713.42	4908.88	14426.1	16509.2	2240.07	1538.71	2246.3	2057.99	5620.98	4276.59	6240.38	9483.98	2996.77	3.1647	up	0.0153609	0.0477935	1.44955
POS	POS_374.324_3.3082	374.324	3.3082	MG 18:1	100	C21H40O4	MG	Monoacylglycerol				"MG(0:0/18:1(11Z)/0:0);MG(0:0/18:1(9Z)/0:0);MG(18:1(11Z)/0:0/0:0);MG(18:1(9Z)/0:0/0:0);Stearoyllactic acid;3-(2-Heptenyloxy)-2-hydroxypropyl undecanoate;1,3-Dihydroxypropan-2-yl oleate;Monoelaidin;1,2,3-Trihydroxyhenicos-12-en-4-one"	8203.44	8147.76	7032.53	7603.99	8241.27	7097.87	2826.65	2349.4	2471.13	2230.07	2722.14	2029.12	5079.61	7721.14	2438.08	3.1669	up	3.95189e-08	2.8304e-06	1.80182
POS	POS_888.757_8.044	888.757	8.044	TG 16:0_18:1_18:3;O	100	C55H98O7	OxTG	Oxidized triglyceride				Aluminum oleate	248447	261864	241875	207606	520095	219255	85314.5	90672.2	81359.7	25710	150728	97207.7	185845	283190	88498.6	3.1999	up	0.00227779	0.0108083	1.68629
POS	POS_880.713_7.9556	880.713	7.9556	Ubidecarenone	75	C59H90O4			Ubiquinones [PR0201]	Quinones and hydroquinones [PR02]	Prenol Lipids [PR]	"PC(O-22:1(13Z)/22:3(10Z,13Z,16Z));PC(O-22:2(13Z,16Z)/22:2(13Z,16Z));PC(O-24:0/20:4(8Z,11Z,14Z,17Z));PC(24:0/P-18:0);PC(P-18:0/24:0);PC(O-18:1(9Z)/24:0);PC(O-22:0/20:1(11Z));N-[(2S,3S,4R)-3,4-Dihydroxy-1-[3,4,5-trihydroxy-6-(hydroxymethyl)oxan-2-yl]oxyoctadecan-2-yl]hexacosanamide;Ensorb"	916005	1.21715e+06	914825	993650	838878	1.01591e+06	220795	282622	313220	299253	404000	317195	644458	982735	306181	3.2097	up	9.08739e-07	2.60341e-05	1.79867
POS	POS_754.648_7.4106	754.648	7.4106	TG 13:0_15:0_14:1;O	91.8	C45H84O7	OxTG	Oxidized triglyceride				"2-methyl-6-solanyl-1,4-benzoquinol"	19742.8	28218.3	33923.3	28002.4	44913.1	21585.5	9182.69	8383.25	3435.13	8735.29	16512.1	8120.64	19229.6	29397.6	9061.52	3.2442	up	0.000803854	0.0047475	1.73293
POS	POS_843.715_7.2126	843.715	7.2126	SM(d18:1/26:0)	77.67	C49H99N2O6P	SM	Sphingomyelin	Ceramide phosphocholines (sphingomyelins) [SP0301]	Phosphosphingolipids [SP03]	Sphingolipids [SP]	Sitosterol 3-O-(6'-O-stearyl-beta-D-glucoside);TG(15:0/16:1(9Z)/O-18:0);TG(15:0/O-18:0/16:1(9Z));TG(16:1(9Z)/15:0/O-18:0)	163063	256544	159198	176572	156468	178653	60675.5	42709.4	47088.4	46934.3	96026.8	42624.6	118880	181750	56009.8	3.245	up	3.71076e-05	0.000429504	1.79166
POS	POS_680.625_8.7739	680.625	8.7739	CE 19:2	80.69	C46H78O2	CE	Cholesteryl ester				DG(20:0/0:0/18:2n6)	150609	132049	185482	160874	210660	192672	40174.1	44542.8	48245.1	55780.3	51984.4	77046.4	112510	172058	52962.2	3.2487	up	2.1882e-06	5.0251e-05	1.79535
POS	POS_994.78_7.8159	994.78	7.8159	"TG(20:4(8Z,11Z,14Z,17Z)/22:4(7Z,10Z,13Z,16Z)/20:5(5Z,8Z,11Z,14Z,17Z))"	71.37	C65H100O6	TG	Triacylglycerol	Triacylglycerols [GL0301]	Triradylglycerols [GL03]	Glycerolipids [GL]	"TG(22:5(7Z,10Z,13Z,16Z,19Z)/18:2(9Z,12Z)/22:6(4Z,7Z,10Z,13Z,16Z,19Z));TG(22:5(7Z,10Z,13Z,16Z,19Z)/18:3(9Z,12Z,15Z)/22:5(7Z,10Z,13Z,16Z,19Z));TG(18:1(11Z)/22:6(4Z,7Z,10Z,13Z,16Z,19Z)/22:6(4Z,7Z,10Z,13Z,16Z,19Z));TG(18:1(9Z)/22:6(4Z,7Z,10Z,13Z,16Z,19Z)/22:6(4Z,7Z,10Z,13Z,16Z,19Z));TG(20:3(5Z,8Z,11Z)/20:4(5Z,8Z,11Z,14Z)/22:6(4Z,7Z,10Z,13Z,16Z,19Z));TG(20:3(5Z,8Z,11Z)/22:5(4Z,7Z,10Z,13Z,16Z)/20:5(5Z…	121025	170784	119187	133535	167909	134172	28386.4	35330.6	39093	38287.7	52270.6	64071.2	92004.3	141102	42906.6	3.2886	up	2.33704e-05	0.000302158	1.80569
POS	POS_912.699_6.9438	912.699	6.9438	PC O-47:9	84.44	C55H94NO7P	PC	Phosphatidylcholine				"PC(24:0/20:3(6,8,11)-OH(5));PC(20:3(6,8,11)-OH(5)/24:0);TG(14:1(9Z)/20:5(5Z,8Z,11Z,14Z,17Z)/22:6(4Z,7Z,10Z,13Z,16Z,19Z));TG(14:1(9Z)/22:6(4Z,7Z,10Z,13Z,16Z,19Z)/20:5(5Z,8Z,11Z,14Z,17Z));TG(18:3(6Z,9Z,12Z)/18:4(6Z,9Z,12Z,15Z)/20:5(5Z,8Z,11Z,14Z,17Z));TG(18:3(6Z,9Z,12Z)/20:5(5Z,8Z,11Z,14Z,17Z)/18:4(6Z,9Z,12Z,15Z));TG(20:4(5Z,8Z,11Z,14Z)/18:4(6Z,9Z,12Z,15Z)/18:4(6Z,9Z,12Z,15Z));TG(18:3(9Z,12Z,15Z)/…	16472.6	19118.2	17663.7	17914.9	15672.7	17847.8	4104.11	5256.5	3897.14	6531.53	5985.61	5959	11368.7	17448.3	5288.98	3.299	up	1.11242e-05	0.000172086	1.82821
POS	POS_746.671_8.9251	746.671	8.9251	CE 24:4	74.2	C51H84O2	CE	Cholesteryl ester				"DG(20:3(5Z,8Z,11Z)/24:1(15Z)/0:0);DG(20:3(8Z,11Z,14Z)/24:1(15Z)/0:0);DG(20:4(5Z,8Z,11Z,14Z)/24:0/0:0);DG(20:4(8Z,11Z,14Z,17Z)/24:0/0:0);DG(22:0/22:4(7Z,10Z,13Z,16Z)/0:0);DG(22:2(13Z,16Z)/22:2(13Z,16Z)/0:0);DG(22:4(7Z,10Z,13Z,16Z)/22:0/0:0);DG(24:0/20:4(5Z,8Z,11Z,14Z)/0:0);DG(24:0/20:4(8Z,11Z,14Z,17Z)/0:0);DG(24:1(15Z)/20:3(5Z,8Z,11Z)/0:0);DG(24:1(15Z)/20:3(8Z,11Z,14Z)/0:0);DG(22:0/0:0/22:4n6);DG…	5195.33	4551.88	5294.7	6059.78	12546.5	6176.62	854.267	1271.53	1761.58	2398.4	2684.36	2766.65	4296.8	6637.47	1956.13	3.3932	up	0.000538692	0.00348099	1.73345
POS	POS_716.627_8.5832	716.627	8.5832	CE 22:5	94.36	C49H78O2	CE	Cholesteryl ester				"Cer(d18:1/26:0);Cer(d18:0/26:1(17Z));CE(22:5(4Z,7Z,10Z,13Z,16Z));CE(22:5(7Z,10Z,13Z,16Z,19Z));cholest-5-en-3beta-yl (7Z,10Z,13Z,16Z,19Z-docosapentaenoate)"	172708	170349	218986	199514	232962	249482	52358.8	52488.9	65382.3	70757.5	63666.7	59672.7	134027	207333	60721.2	3.4145	up	6.61592e-08	4.03602e-06	1.84441
POS	POS_872.55_6.0854	872.55	6.0854	SM(d17:1/LTE4)	75.89	C45H82N3O9PS	SM	Sphingomyelin	Ceramide phosphocholines (sphingomyelins) [SP0301]	Phosphosphingolipids [SP03]	Sphingolipids [SP]	"PE(22:4(7Z,10Z,13Z,16Z)/22:6(5Z,8E,10Z,13Z,15E,19Z)-2OH(7S, 17S));PE(22:6(5Z,8E,10Z,13Z,15E,19Z)-2OH(7S, 17S)/22:4(7Z,10Z,13Z,16Z));PE(22:4(7Z,10Z,13Z,16Z)/22:6(4Z,7Z,11E,13Z,15E,19Z)-2OH(10S,17));PE(22:6(4Z,7Z,11E,13Z,15E,19Z)-2OH(10S,17)/22:4(7Z,10Z,13Z,16Z));SM(d17:1/LTE4);PC(18:0/22:6(4Z,7Z,10Z,13Z,16Z,19Z));PC(18:1(11Z)/22:5(4Z,7Z,10Z,13Z,16Z));PC(18:1(11Z)/22:5(7Z,10Z,13Z,16Z,19Z));PC(18:1…	13019.9	7499.88	13152.9	13680.8	14398.1	13445.2	3441.42	3413.57	3531.05	3173.97	2334.55	5999.27	8090.88	12532.8	3648.97	3.4346	up	1.80859e-05	0.000250221	1.81778
POS	POS_908.638_7.1214	908.638	7.1214	PC O-47:11	76.9	C55H90NO7P	EtherPC	Ether-linked phosphatidylcholine				"PE(DiMe(11,5)/DiMe(13,5));PE(DiMe(13,5)/DiMe(11,5));PE(MonoMe(13,5)/MonoMe(13,5));PE-NMe(11D5/13M5);PE-NMe(11M5/13D5);PE-NMe(13D5/11M5);PE-NMe(13M5/11D5);PE-NMe2(11D3/13D5);PE-NMe2(11D5/11D5);PE-NMe2(11M5/13M5);PE-NMe2(13D5/11D3);PE-NMe2(13D5/9D5);PE-NMe2(13M5/11M5);PE-NMe2(9D5/13D5);PE(24:0/22:6(5Z,8E,10Z,13Z,15E,19Z)-2OH(7S, 17S));PE(22:6(5Z,8E,10Z,13Z,15E,19Z)-2OH(7S, 17S)/24:0);PE(24:0/22:6(…	7555.17	2890.76	6933.64	7178.74	3624.9	5789.76	2016.63	1057.54	650.639	2979.73	155.398	2905.43	3644.86	5662.16	1627.56	3.4789	up	0.017674	0.0531409	1.78712
POS	POS_1020.79_7.8674	1020.79	7.8674	TG 20:4_22:5_22:5	100	C67H102O6	TG	Triacylglycerol					21895.6	22240	22409.6	20656.6	27178.5	22968.4	6965.33	2190.4	7613.69	3329.76	11449.7	7541.95	14703.3	22891.5	6515.14	3.5136	up	0.00240704	0.0113036	1.85188
POS	POS_778.652_7.6556	778.652	7.6556	TG 11:0_18:2_15:1;O	97.2	C47H84O7	OxTG	Oxidized triglyceride					11258	17438.3	13759.2	12683	42973.4	12262.9	5253.15	5036.82	5555.41	4550.79	6991.16	3975.57	11811.5	18395.8	5227.15	3.5193	up	0.00156983	0.00805165	1.67108
POS	POS_746.53_5.0126	746.53	5.0126	"PC(18:1(12Z)-O(9S,10R)/14:0)"	71.75	C40H76NO9P	PC	Phosphatidylcholine	Diacylglycerophosphocholines [GP0101]	Glycerophosphocholines [GP01]	Glycerophospholipids [GP]	"PC(14:0/18:1(12Z)-O(9S,10R));PC(18:1(12Z)-O(9S,10R)/14:0);PC(14:0/18:1(9Z)-O(12,13));PC(18:1(9Z)-O(12,13)/14:0);PA(17:0/20:3(6,8,11)-OH(5));PA(20:3(6,8,11)-OH(5)/17:0);PA(19:0/18:2(10E,12Z)+=O(9));PA(18:2(10E,12Z)+=O(9)/19:0);PA(19:0/18:2(9Z,11E)+=O(13));PA(18:2(9Z,11E)+=O(13)/19:0);PA(19:0/18:3(10,12,15)-OH(9));PA(18:3(10,12,15)-OH(9)/19:0);PA(19:0/18:3(9,11,15)-OH(13));PA(18:3(9,11,15)-OH(13)/…	10279.8	9197.45	8661.02	8028.9	12823.8	8223.75	3242.16	1929.58	3993.54	3453.57	571.902	2712.91	6093.2	9535.79	2650.61	3.5976	up	0.00391179	0.016502	1.83665
POS	POS_617.504_6.8729	617.504	6.8729	DG(16:0/18:1(9Z)/0:0)	77.82	C37H70O5	DG	Diacylglycerol	Diacylglycerols [GL0201]	Diradylglycerols [GL02]	Glycerolipids [GL]		21461.5	13831.2	28756.9	26879.5	25339.2	24374.1	6905.95	7115.17	9566.3	537.955	8766.63	6031.61	14963.8	23440.4	6487.27	3.6133	up	0.0168527	0.0513022	1.78966
POS	POS_834.598_6.0881	834.598	6.0881	"PC(22:5(7Z,10Z,13Z,16Z,19Z)/18:1(9Z))"	95.95	C48H84NO8P	PC	Phosphatidylcholine	Diacylglycerophosphocholines [GP0101]	Glycerophosphocholines [GP01]	Glycerophospholipids [GP]	"PC(18:0/22:6(4Z,7Z,10Z,13Z,16Z,19Z));PC(18:1(11Z)/22:5(4Z,7Z,10Z,13Z,16Z));PC(18:1(11Z)/22:5(7Z,10Z,13Z,16Z,19Z));PC(18:1(9Z)/22:5(4Z,7Z,10Z,13Z,16Z));PC(18:1(9Z)/22:5(7Z,10Z,13Z,16Z,19Z));PC(18:2(9Z,12Z)/22:4(7Z,10Z,13Z,16Z));PC(18:4(6Z,9Z,12Z,15Z)/22:2(13Z,16Z));PC(20:1(11Z)/20:5(5Z,8Z,11Z,14Z,17Z));PC(20:2(11Z,14Z)/20:4(5Z,8Z,11Z,14Z));PC(20:2(11Z,14Z)/20:4(8Z,11Z,14Z,17Z));PC(20:3(5Z,8Z,11Z)…	26292936	2.81824e+07	2.89178e+07	2.84414e+07	2.30534e+07	2.81494e+07	8.42068e+06	8.32914e+06	8.82447e+06	8.52133e+06	3.71293e+06	7.20316e+06	1.73374e+07	2.71729e+07	7.50195e+06	3.6221	up	0.000113872	0.00102869	1.88773
POS	POS_954.831_8.6057	954.831	8.6057	TG 18:0_18:1_22:4	100	C61H108O6	TG	Triacylglycerol					297964	335961	340045	369350	587038	398455	75640.6	59472.3	182730	98229.5	99037.7	123933	247321	388136	106507	3.6442	up	8.22612e-05	0.000804117	1.86068
POS	POS_723.537_5.3834	723.537	5.3834	SM 17:3;2O/19:2	82.92	C41H75N2O6P	SM	Sphingomyelin	Ceramide phosphocholines (sphingomyelins) [SP0301]	Phosphosphingolipids [SP03]	Sphingolipids [SP]	"6-(6-(3r-Hydroxy-1e,5z-undecadien-1-yl)-2-pyridinyl)-1,5s-hexanediol;Cer(d18:0/LTE4);SM(d18:1/16:1(9Z));SM(d18:2(4E,14Z)/16:0)"	283079	122231	326983	337022	282587	346410	70112.9	82622.3	86801.8	89616.1	14105.2	122596	180347	283052	77642.4	3.6456	up	0.00466129	0.0189247	1.77932
POS	POS_863.692_7.2135	863.692	7.2135	SM 27:3;2O/19:2	73.72	C51H95N2O6P	SM	Sphingomyelin	Ceramide phosphocholines (sphingomyelins) [SP0301]	Phosphosphingolipids [SP03]	Sphingolipids [SP]	Solanocardinol;N-Stearoyl phenylalanine;Peimine;Ensorb;SM(d18:1/26:1(17Z))	20428	16085.3	21816.4	20111.5	78449.3	23024.9	2241	3691.89	4686.18	10347.1	5690.66	22651.5	19102	29985.9	8218.05	3.6488	up	0.00681444	0.025425	1.73066
POS	POS_909.73_7.5669	909.73	7.5669	TG O-16:1_20:4_20:4	100	C59H98O5	EtherTG	Ether-linked triacylglycerol				"TG(15:0/18:0/20:3(5Z,8Z,11Z));TG(15:0/18:0/20:3n6);TG(15:0/20:0/18:3(6Z,9Z,12Z));TG(15:0/20:0/18:3(9Z,12Z,15Z));TG(15:0/16:1(9Z)/22:2(13Z,16Z));TG(15:0/18:1(11Z)/20:2n6);TG(15:0/18:1(9Z)/20:2n6);TG(15:0/20:1(11Z)/18:2(9Z,12Z));TG(15:0/20:3(5Z,8Z,11Z)/18:0);TG(15:0/18:2(9Z,12Z)/20:1(11Z));TG(15:0/18:3(6Z,9Z,12Z)/20:0);TG(15:0/20:2n6/18:1(11Z));TG(15:0/20:2n6/18:1(9Z));TG(15:0/20:3n6/18:0);TG(15:0…	74787.2	100043	50487.7	80545.7	116920	80991.1	25997.8	691.109	26970.2	27641.5	36877	19519.1	53456	83962.4	22949.5	3.6586	up	0.0378416	0.0962071	1.79054
POS	POS_834.6_6.0851	834.6	6.0851	"PC(P-18:0/22:6(4Z,7Z,10Z,13E,15E,19Z)-OH(17))"	97.69	C48H84NO8P	PC	Phosphatidylcholine	Diacylglycerophosphocholines [GP0101]	Glycerophosphocholines [GP01]	Glycerophospholipids [GP]	"PC(18:0/22:6(4Z,7Z,10Z,13Z,16Z,19Z));PC(18:1(11Z)/22:5(4Z,7Z,10Z,13Z,16Z));PC(18:1(11Z)/22:5(7Z,10Z,13Z,16Z,19Z));PC(18:1(9Z)/22:5(4Z,7Z,10Z,13Z,16Z));PC(18:1(9Z)/22:5(7Z,10Z,13Z,16Z,19Z));PC(18:2(9Z,12Z)/22:4(7Z,10Z,13Z,16Z));PC(18:4(6Z,9Z,12Z,15Z)/22:2(13Z,16Z));PC(20:1(11Z)/20:5(5Z,8Z,11Z,14Z,17Z));PC(20:2(11Z,14Z)/20:4(5Z,8Z,11Z,14Z));PC(20:2(11Z,14Z)/20:4(8Z,11Z,14Z,17Z));PC(20:3(5Z,8Z,11Z)…	2.65605e+07	2.76015e+07	2.91759e+07	2.94498e+07	2.3237e+07	2.81606e+07	8.41012e+06	8.37487e+06	8.75033e+06	8.44079e+06	3.75383e+06	6.89024e+06	1.74004e+07	2.73642e+07	7.4367e+06	3.6796	up	9.47228e-05	0.000894022	1.90055
POS	POS_996.794_7.974	996.794	7.974	"TG(22:5(4Z,7Z,10Z,13Z,16Z)/22:4(7Z,10Z,13Z,16Z)/18:3(9Z,12Z,15Z))"	72.76	C65H102O6	TG	Triacylglycerol	Triacylglycerols [GL0301]	Triradylglycerols [GL03]	Glycerolipids [GL]	"TG(22:5(7Z,10Z,13Z,16Z,19Z)/18:1(9Z)/22:6(4Z,7Z,10Z,13Z,16Z,19Z));TG(22:5(7Z,10Z,13Z,16Z,19Z)/18:2(9Z,12Z)/22:5(7Z,10Z,13Z,16Z,19Z));TG(22:6(4Z,7Z,10Z,13Z,16Z,19Z)/18:0/22:6(4Z,7Z,10Z,13Z,16Z,19Z));TG(18:0/22:6(4Z,7Z,10Z,13Z,16Z,19Z)/22:6(4Z,7Z,10Z,13Z,16Z,19Z));TG(18:1(11Z)/22:5(4Z,7Z,10Z,13Z,16Z)/22:6(4Z,7Z,10Z,13Z,16Z,19Z));TG(18:1(11Z)/22:5(7Z,10Z,13Z,16Z,19Z)/22:6(4Z,7Z,10Z,13Z,16Z,19Z));TG…	157292	219068	155324	162282	201372	170607	22853.9	34058.3	38881.1	61003.6	53409.8	79014.5	112930	177657	48203.5	3.6856	up	0.000363537	0.00256474	1.89069
NEG	NEG_850.563_5.6769	850.563	5.6769	Hex2Cer 29:1;2O	70.52	C41H77NO13	Hex2Cer	Dihexosylceramide				"PE(DiMe(11,3)/DiMe(11,5));PE(DiMe(11,5)/DiMe(11,3));PE(DiMe(11,5)/DiMe(9,5));PE(DiMe(13,5)/DiMe(9,3));PE(DiMe(9,3)/DiMe(13,5));PE(DiMe(9,5)/DiMe(11,5));PE(MonoMe(11,3)/MonoMe(13,5));PE(MonoMe(11,5)/MonoMe(11,5));PE(MonoMe(13,5)/MonoMe(11,3));PE(MonoMe(13,5)/MonoMe(9,5));PE(MonoMe(9,5)/MonoMe(13,5));PE-NMe(11D3/11M5);PE-NMe(11D5/11M3);PE-NMe(11D5/9M5);PE-NMe(11M3/11D5);PE-NMe(11M5/11D3);PE-NMe(11…	1.86807e+06	1.61446e+06	1.84611e+06	1.92244e+06	1.60358e+06	2.11271e+06	514863	546378	482982	531186	478801	402184	1.16031e+06	1.82789e+06	492732	3.7097	up	1.36244e-09	2.72921e-07	1.91896
POS	POS_791.676_7.074	791.676	7.074	SM 39:0;O2	82.6	C44H91N2O7P	SM	Sphingomyelin				b-Cryptoxanthin palmitate	7347.09	9265.77	5051.22	8623.11	9096.31	8992.87	606.842	984.243	730.782	835.823	935.864	8874.2	5112.01	8062.73	2161.29	3.7305	up	0.00490693	0.0197152	2.09173
POS	POS_367.332_8.4396	367.332	8.4396	ST 27:2;O	100	C27H44O	ST	Sterol Lipids				Dihomo-gamma-linolenoylethanolamide	378179	381200	396665	356572	410964	341090	60772.1	117086	107803	107521	75019.2	126247	238260	377445	99074.7	3.8097	up	4.61558e-05	0.000508577	1.93432
POS	POS_806.597_6.788	806.597	6.788	PC O-39:6	89.7	C47H84NO7P	EtherPC	Ether-linked phosphatidylcholine				"PS(15:0/22:0);PS(22:0/15:0);PE(20:0/18:1(12Z)-2OH(9,10));PE(18:1(12Z)-2OH(9,10)/20:0);PC(17:0/18:1(12Z)-2OH(9,10));PC(18:1(12Z)-2OH(9,10)/17:0);PE(22:1(13Z)/P-18:1(11Z));PE(22:1(13Z)/P-18:1(9Z));PE(22:2(13Z,16Z)/P-18:0);PE(P-18:0/22:2(13Z,16Z));PE(P-18:1(11Z)/22:1(13Z));PE(P-18:1(9Z)/22:1(13Z));PA(22:1(13Z)/18:1(12Z)-2OH(9,10));PA(18:1(12Z)-2OH(9,10)/22:1(13Z));SM(d17:1/PGF1alpha);SM(d19:0/5-iso…	46741.3	67937.7	51053.5	53300.4	112919	47938.6	15037.7	14479.2	14068	12664.8	15394.5	27777.1	39942.6	63315	16570.2	3.821	up	2.76499e-05	0.000343498	1.85971
POS	POS_992.763_7.7055	992.763	7.7055	TG 20:4_20:4_22:6	100	C65H98O6	TG	Triacylglycerol				"TG(20:4(5Z,8Z,11Z,14Z)/20:4(5Z,8Z,11Z,14Z)/22:6(4Z,7Z,10Z,13Z,16Z,19Z));TG(22:5(7Z,10Z,13Z,16Z,19Z)/18:3(9Z,12Z,15Z)/22:6(4Z,7Z,10Z,13Z,16Z,19Z));TG(22:6(4Z,7Z,10Z,13Z,16Z,19Z)/18:2(9Z,12Z)/22:6(4Z,7Z,10Z,13Z,16Z,19Z));TG(20:3(5Z,8Z,11Z)/20:5(5Z,8Z,11Z,14Z,17Z)/22:6(4Z,7Z,10Z,13Z,16Z,19Z));TG(20:3(5Z,8Z,11Z)/22:6(4Z,7Z,10Z,13Z,16Z,19Z)/20:5(5Z,8Z,11Z,14Z,17Z));TG(18:2(9Z,12Z)/22:6(4Z,7Z,10Z,13Z,…	79055.1	107305	72724.6	83055.2	88693.2	83478.2	18756.9	16161	18706.4	16760.1	34017.6	29541.6	54021.2	85718.5	22323.9	3.8398	up	2.96351e-05	0.000361577	1.93508
NEG	NEG_895.58_6.092	895.58	6.092	DGGA 22:4_22:4	100	C53H84O11	DGGA	Diacylglyceryl glucuronide				"PA(24:0/PGF1alpha);PA(PGF1alpha/24:0);PA(i-24:0/PGF1alpha);PA(PGF1alpha/i-24:0);5,8-Epoxy-5,8-dihydro-3-hydroxy-8'-apo-b,y-carotenal;beta-Citraurin epoxide;Apo-8'-capsorubinal;(3S,5R,6S)-5,6-Epoxy-5,6-dihydro-3-hydroxy-8'-apo-beta,psi-carotenal"	14226.5	11877.4	18740.7	13520.5	12657.3	16892.3	3002.23	3791.05	4160.36	4094.57	3530	3680.12	9181.09	14652.5	3709.72	3.9497	up	8.9391e-08	4.99164e-06	1.95061
POS	POS_856.577_6.0884	856.577	6.0884	PC 20:4_22:5	72.91	C50H82NO8P	PC	Phosphatidylcholine	Diacylglycerophosphocholines [GP0101]	Glycerophosphocholines [GP01]	Glycerophospholipids [GP]	"PC(20:3(5Z,8Z,11Z)/22:6(4Z,7Z,10Z,13Z,16Z,19Z));PC(20:3(8Z,11Z,14Z)/22:6(4Z,7Z,10Z,13Z,16Z,19Z));PC(20:4(5Z,8Z,11Z,14Z)/22:5(4Z,7Z,10Z,13Z,16Z));PC(20:4(5Z,8Z,11Z,14Z)/22:5(7Z,10Z,13Z,16Z,19Z));PC(20:4(8Z,11Z,14Z,17Z)/22:5(4Z,7Z,10Z,13Z,16Z));PC(20:4(8Z,11Z,14Z,17Z)/22:5(7Z,10Z,13Z,16Z,19Z));PC(20:5(5Z,8Z,11Z,14Z,17Z)/22:4(7Z,10Z,13Z,16Z));PC(22:4(7Z,10Z,13Z,16Z)/20:5(5Z,8Z,11Z,14Z,17Z));PC(22:5…	75350.4	44051.2	97242.6	83591.2	115111	88671.7	17305.5	19306.2	20380.9	25202.2	8356.26	36257.1	52568.9	84003.1	21134.7	3.9747	up	0.000234937	0.00180546	1.89568
NEG	NEG_319.227_2.01	319.227	2.01	FA 20:4;O	100	C20H32O3	OxFA	Oxidized fatty acid				"5,6-Epoxy-8,11,14-eicosatrienoic acid;8,9-Epoxyeicosatrienoic acid;14R,15S-EpETrE;14,15-Epoxy-5,8,11-eicosatrienoic acid;8-HETE;16(R)-HETE;11(R)-HETE;18-Hydroxyarachidonic acid;9-HETE;19(S)-HETE;10-HETE;13-HETE;17-HETE;Annoglabasin E;Ucriol;8alpha,13R-Epoxy-14-labden-19-oic acid;2-Hydroxy-6-tridecylbenzoic acid;(ent-2alpha,3beta,15beta,16beta)-15,16-Epoxy-2,3-kauranediol;(ent-2alpha,3beta,15beta…	312430	239684	266195	323505	244620	371464	78226.3	77474.2	75521.7	80234.2	68451.9	59800.8	183134	292983	73284.9	3.9979	up	1.00171e-07	5.36096e-06	1.96022
POS	POS_806.567_5.672	806.567	5.672	"PC(P-18:1(9Z)/20:5(5Z,8Z,10E,14Z,17Z)-OH(12))"	97.72	C46H80NO8P	PC	Phosphatidylcholine	Diacylglycerophosphocholines [GP0101]	Glycerophosphocholines [GP01]	Glycerophospholipids [GP]	"LacCer(d18:1/12:0);PC(16:0/22:6(4Z,7Z,10Z,13Z,16Z,19Z));PC(16:1(9Z)/22:5(4Z,7Z,10Z,13Z,16Z));PC(16:1(9Z)/22:5(7Z,10Z,13Z,16Z,19Z));PC(18:1(11Z)/20:5(5Z,8Z,11Z,14Z,17Z));PC(18:1(9Z)/20:5(5Z,8Z,11Z,14Z,17Z));PC(18:2(9Z,12Z)/20:4(5Z,8Z,11Z,14Z));PC(18:2(9Z,12Z)/20:4(8Z,11Z,14Z,17Z));PC(18:3(6Z,9Z,12Z)/20:3(5Z,8Z,11Z));PC(18:3(6Z,9Z,12Z)/20:3(8Z,11Z,14Z));PC(18:3(9Z,12Z,15Z)/20:3(5Z,8Z,11Z));PC(18:3…	4.73983e+07	6.0048e+07	4.82686e+07	4.81283e+07	4.26094e+07	5.22024e+07	1.56082e+07	1.36939e+07	1.35161e+07	1.2915e+07	7.68709e+06	1.09677e+07	3.10869e+07	4.97759e+07	1.2398e+07	4.0148	up	4.59463e-06	8.74632e-05	1.96923
POS	POS_693.551_8.3246	693.551	8.3246	DG 40:5	72.24	C43H74O5	DG	Diacylglycerol				"DG(20:2(11Z,14Z)/22:6(4Z,7Z,10Z,13Z,16Z,19Z)/0:0);DG(20:3(5Z,8Z,11Z)/22:5(4Z,7Z,10Z,13Z,16Z)/0:0);DG(20:3(5Z,8Z,11Z)/22:5(7Z,10Z,13Z,16Z,19Z)/0:0);DG(20:3(8Z,11Z,14Z)/22:5(4Z,7Z,10Z,13Z,16Z)/0:0);DG(20:3(8Z,11Z,14Z)/22:5(7Z,10Z,13Z,16Z,19Z)/0:0);DG(20:4(5Z,8Z,11Z,14Z)/22:4(7Z,10Z,13Z,16Z)/0:0);DG(20:4(8Z,11Z,14Z,17Z)/22:4(7Z,10Z,13Z,16Z)/0:0);DG(22:4(7Z,10Z,13Z,16Z)/20:4(5Z,8Z,11Z,14Z)/0:0);DG(2…	5050.29	6164.9	8021.53	6997.06	11279	6140.95	743.536	2526.83	1262.22	692.222	1262.83	4328.21	4539.14	7275.63	1802.64	4.0361	up	0.00179923	0.00896919	1.95471
POS	POS_720.538_4.8761	720.538	4.8761	TG 8:0_15:2_16:3;O2	90.7	C42H70O8	OxTG	Oxidized triglyceride				"N-[(4E,8Z)-1,3-dihydroxyoctadeca-4,8-dien-2-yl]hexadecanamide 1-glucoside"	6051.74	5949.86	6085.7	6251.26	6363.18	6468.17	1418.36	1196.64	1256.31	1288.24	1456.19	2586.32	3864.33	6194.99	1533.68	4.0393	up	5.39346e-05	0.000575932	1.98572
NEG	NEG_704.58_6.8037	704.58	6.8037	Cer 41:4;3O	72.8	C41H75NO4	Cer_NP	Ceramide non-hydroxyfatty acid-phytospingosine					8821.11	6997.83	8566	9690.95	7504.82	10331	2342.84	2362.78	2394.7	2153.18	1860.78	1705.41	5394.28	8651.96	2136.61	4.0494	up	1.28341e-08	1.32043e-06	1.97478
POS	POS_704.625_8.596	704.625	8.596	SE 28:1/20:4	71.25	C48H78O2	SE					Cer(d18:0/25:0);DG(18:2n6/0:0/22:2n6)	64199.7	53275	69423.5	58530.8	107431	63857.9	14340	12665.5	15089.5	14576.2	13557.6	30925.5	43156	69452.9	16859.1	4.1196	up	1.03159e-05	0.000162525	1.96007
POS	POS_920.887_9.3125	920.887	9.3125	TG O-22:1_14:0_20:0	100	C59H114O5	EtherTG	Ether-linked triacylglycerol					21040	27627	12632.6	23751.2	35026.1	23454.7	304.665	2656.13	39.9137	3431.56	8277.34	19827.2	14839	23921.9	5756.13	4.1559	up	0.0362898	0.0931386	2.23457
POS	POS_834.593_6.4811	834.593	6.4811	"PC(22:5(4Z,7Z,10Z,13Z,16Z)/18:1(9Z))"	95.9	C48H84NO8P	PC	Phosphatidylcholine	Diacylglycerophosphocholines [GP0101]	Glycerophosphocholines [GP01]	Glycerophospholipids [GP]	"PC(18:0/22:6(4Z,7Z,10Z,13Z,16Z,19Z));PC(18:1(11Z)/22:5(4Z,7Z,10Z,13Z,16Z));PC(18:1(11Z)/22:5(7Z,10Z,13Z,16Z,19Z));PC(18:1(9Z)/22:5(4Z,7Z,10Z,13Z,16Z));PC(18:1(9Z)/22:5(7Z,10Z,13Z,16Z,19Z));PC(18:2(9Z,12Z)/22:4(7Z,10Z,13Z,16Z));PC(18:4(6Z,9Z,12Z,15Z)/22:2(13Z,16Z));PC(20:1(11Z)/20:5(5Z,8Z,11Z,14Z,17Z));PC(20:2(11Z,14Z)/20:4(5Z,8Z,11Z,14Z));PC(20:2(11Z,14Z)/20:4(8Z,11Z,14Z,17Z));PC(20:3(5Z,8Z,11Z)…	696824	815158	678856	717070	541153	653709	139434	175759	159935	170444	129685	210930	424080	683795	164365	4.1602	up	4.00044e-08	2.85728e-06	1.99642
POS	POS_740.517_5.9374	740.517	5.9374	"PE(16:0/20:4(5Z,8Z,11Z,14Z))"	87.87	C41H74NO8P	PE	Phosphatidylethanolamine	Diacylglycerophosphoethanolamines [GP0201]	Glycerophosphoethanolamines [GP02]	Glycerophospholipids [GP]	"PC(15:0/18:4(6Z,9Z,12Z,15Z));PC(18:4(6Z,9Z,12Z,15Z)/15:0);PE(14:0/22:4(7Z,10Z,13Z,16Z));PE(16:0/20:4(5Z,8Z,11Z,14Z));PE(16:0/20:4(8Z,11Z,14Z,17Z));PE(16:1(9Z)/20:3(5Z,8Z,11Z));PE(18:0/18:4(6Z,9Z,12Z,15Z));PE(18:1(11Z)/18:3(6Z,9Z,12Z));PE(18:1(11Z)/18:3(9Z,12Z,15Z));PE(18:1(9Z)/18:3(6Z,9Z,12Z));PE(18:1(9Z)/18:3(9Z,12Z,15Z));PE(18:2(9Z,12Z)/18:2(9Z,12Z));PE(18:3(6Z,9Z,12Z)/18:1(11Z));PE(18:3(6Z,9Z…	268662	349662	303489	296471	358552	288018	67296.8	76654.1	76750.1	67854.9	35149.1	112752	191776	310809	72742.8	4.2727	up	9.84637e-05	0.000920616	2.00974
POS	POS_841.71_7.2145	841.71	7.2145	SM 31:2;2O/13:0	94.75	C49H97N2O6P	SM	Sphingomyelin	Ceramide phosphocholines (sphingomyelins) [SP0301]	Phosphosphingolipids [SP03]	Sphingolipids [SP]	SM(d18:1/26:1(17Z))	1.33161e+06	2.09226e+06	1.31311e+06	1.44708e+06	1.31251e+06	1.49966e+06	326629	297771	311370	302842	546023	291506	922698	1.49937e+06	346024	4.3332	up	5.59028e-07	1.84167e-05	2.01817
POS	POS_714.611_8.4113	714.611	8.4113	CE 22:6	92.57	C49H76O2	CE	Cholesteryl ester	Cholesteryl esters [ST0102]	Sterols [ST01]	Sterols [ST]		2.88903e+06	3.0121e+06	3.23984e+06	3.17823e+06	2.48412e+06	3.15457e+06	515444	742019	770699	745560	710824	639193	1.84014e+06	2.99298e+06	687290	4.3548	up	1.61899e-08	1.54777e-06	2.03509
POS	POS_832.697_7.5552	832.697	7.5552	TG 15:1_18:1_15:2;O	93.1	C51H90O7	OxTG	Oxidized triglyceride				Sitoindoside I;Sitosterol 3-O-(6'-O-palmitoyl-beta-D-glucoside)	260071	384877	245668	275582	285598	288874	68166.7	58072.5	66038.7	55186.3	95094	54982	178184	290112	66256.7	4.3786	up	1.4588e-07	6.8847e-06	2.03039
POS	POS_828.548_5.6801	828.548	5.6801	"PC(20:4(8Z,11Z,14Z,17Z)/20:5(5Z,8Z,11Z,14Z,17Z))"	76.46	C48H78NO8P	PC	Phosphatidylcholine	Diacylglycerophosphocholines [GP0101]	Glycerophosphocholines [GP01]	Glycerophospholipids [GP]	"PC(18:3(6Z,9Z,12Z)/22:6(4Z,7Z,10Z,13Z,16Z,19Z));PC(18:3(9Z,12Z,15Z)/22:6(4Z,7Z,10Z,13Z,16Z,19Z));PC(18:4(6Z,9Z,12Z,15Z)/22:5(4Z,7Z,10Z,13Z,16Z));PC(18:4(6Z,9Z,12Z,15Z)/22:5(7Z,10Z,13Z,16Z,19Z));PC(20:4(5Z,8Z,11Z,14Z)/20:5(5Z,8Z,11Z,14Z,17Z));PC(20:4(8Z,11Z,14Z,17Z)/20:5(5Z,8Z,11Z,14Z,17Z));PC(20:5(5Z,8Z,11Z,14Z,17Z)/20:4(5Z,8Z,11Z,14Z));PC(20:5(5Z,8Z,11Z,14Z,17Z)/20:4(8Z,11Z,14Z,17Z));PC(22:5(4Z…	249374	177277	317093	294169	272589	290127	47948.2	67291.6	74489.9	69923.2	15580.2	88435.7	163692	266772	60611.5	4.4013	up	0.00108132	0.00600588	1.99683
POS	POS_396.309_2.6577	396.309	2.6577	CAR 16:2	100	C23H41NO4	CAR	Acylcarnitine					4546.13	4154.83	4187.62	4856.11	4789.64	4737.75	1236.57	923.419	1000.87	1106.01	1108.24	803.188	2787.53	4545.35	1029.72	4.4142	up	1.24997e-07	6.18472e-06	2.04853
POS	POS_998.806_8.1053	998.806	8.1053	TG 20:3_20:4_22:4	100	C65H104O6	TG	Triacylglycerol					151178	187794	153644	144949	113302	152788	11985.7	21194.6	20636.6	41727	25516.5	81355.4	92172.6	150609	33736	4.4644	up	0.00120341	0.00652464	2.05683
POS	POS_1002.83_8.3552	1002.83	8.3552	TG 20:2_22:3_20:4	100	C65H108O6	TG	Triacylglycerol					58064.7	68712.1	71490.7	61470.7	128419	72264.8	14404	15357.1	14700.7	21070.9	17458.9	18481.1	46824.5	76737	16912.1	4.5374	up	5.22278e-06	9.59288e-05	2.01474
POS	POS_719.566_8.4153	719.566	8.4153	"DG(i-21:0/18:1(12Z)-2OH(9,10)/0:0)"	72.27	C42H80O7	DG	Diacylglycerol				"DG(22:4(7Z,10Z,13Z,16Z)/22:5(4Z,7Z,10Z,13Z,16Z)/0:0);DG(22:4(7Z,10Z,13Z,16Z)/22:5(7Z,10Z,13Z,16Z,19Z)/0:0);DG(22:5(4Z,7Z,10Z,13Z,16Z)/22:4(7Z,10Z,13Z,16Z)/0:0);DG(22:5(7Z,10Z,13Z,16Z,19Z)/22:4(7Z,10Z,13Z,16Z)/0:0);DG(22:4n6/0:0/22:5n6);DG(22:4n6/0:0/22:5n3);PE(16:0/P-18:1(11Z));PE(16:0/P-18:1(9Z));PE(16:1(9Z)/P-18:0);PE(18:1(11Z)/P-16:0);PE(18:1(9Z)/P-16:0);PEP-16:0/18:1(11Z));PE(P-16:0/18:1(9Z)…	7269.3	6493.12	12454.6	9001.96	23765.1	10851.8	2971.3	1896.36	1792.36	1978.13	2455.49	4110.43	7086.66	11639.3	2534.01	4.5932	up	0.000139919	0.00120481	1.93347
POS	POS_1022.81_7.981	1022.81	7.981	TG 20:2_22:5_22:6	100	C67H104O6	TG	Triacylglycerol				"TG(20:1(11Z)/22:6(4Z,7Z,10Z,13Z,16Z,19Z)/22:6(4Z,7Z,10Z,13Z,16Z,19Z));TG(20:3(5Z,8Z,11Z)/22:4(7Z,10Z,13Z,16Z)/22:6(4Z,7Z,10Z,13Z,16Z,19Z));TG(20:3(5Z,8Z,11Z)/22:5(4Z,7Z,10Z,13Z,16Z)/22:5(4Z,7Z,10Z,13Z,16Z));TG(20:3(5Z,8Z,11Z)/22:5(4Z,7Z,10Z,13Z,16Z)/22:5(7Z,10Z,13Z,16Z,19Z));TG(20:3(5Z,8Z,11Z)/22:5(7Z,10Z,13Z,16Z,19Z)/22:5(4Z,7Z,10Z,13Z,16Z));TG(20:3(5Z,8Z,11Z)/22:5(7Z,10Z,13Z,16Z,19Z)/22:5(7Z,1…	24738.6	27837.6	25438.5	25550.6	30708.2	27827.4	2283.82	2251.46	5829.65	2755.51	3279.43	17920.2	16368.4	27016.8	5720.02	4.7232	up	0.00214332	0.0103266	2.16094
POS	POS_806.681_7.5171	806.681	7.5171	TG 14:1_18:1_14:1;O	92.7	C49H88O7	OxTG	Oxidized triglyceride					168836	259111	158809	196645	146047	189885	31120.1	30472.5	34491.8	29115.1	57432.7	48005.8	112498	186555	38439.7	4.8532	up	1.13376e-06	3.09385e-05	2.0911
POS	POS_884.729_7.6889	884.729	7.6889	TG 19:2_19:3_14:1;O	100	C55H94O7	OxTG	Oxidized triglyceride					442050	649053	419496	479413	402959	498002	81708	80516.5	95080	81340.7	144751	108563	290244	481829	98659.9	4.8837	up	2.10801e-07	9.12428e-06	2.10299
NEG	NEG_337.31_5.471	337.31	5.471	FA 22:1	100	C22H42O2	FA	Fatty acyls	Unsaturated fatty acids [FA0103]	Fatty Acids and Conjugates [FA01]	Fatty Acyls [FA]	"Erucic acid;Cetoleic acid;Phytyl acetate;7,9-Docosanedione;6,8-Docosanedione;5,7-Docosanedione;4,6-Docosanedione;N-butyl Oleate;Brassidic acid;15-Docosenoic acid;Docosenic acid;Docosenoic acid;3-Eicosyne;5-Eicosyne;9-Icosyne;Labdane;Neophytadiene"	12334	9671.07	13076.5	13071	9257.25	12947.6	2250.28	2482.04	2713.83	2382.47	2453.23	1928.58	7047.31	11726.2	2368.4	4.9511	up	8.81065e-09	9.9319e-07	2.11476
POS	POS_377.264_2.7751	377.264	2.7751	2-Linoleoyl Glycerol	70.47	C21H38O4			Monoacylglycerols [GL0101]	Monoradylglycerols [GL01]	Glycerolipids [GL]	"L-Targinine;Methylarginine;delta-N-Methylarginine;Methyl L-argininate;N2-Methyl-L-arginine;(2S)-2-Amino-5-(diaminomethylideneamino)-4-methylpentanoic acid;4,7,13,16,21,24-Hexaoxa-1,10-diazabicyclo[8.8.8]hexacosane;MG(0:0/18:2(9Z,12Z)/0:0);MG(18:2(9Z,12Z)/0:0/0:0);Glyceryl monolinoleate;2-Linoleoyl Glycerol;RIOPROSTIL;Undecanedioylcarnitine;Gepirone;Glycyllysylarginine;Lavoltidine"	43358.9	38782.6	42441.4	46470.6	37801.2	49922.3	9367.02	7912.41	9425.15	8257.99	8000.26	8421.46	25846.8	43129.5	8564.05	5.0361	up	1.75578e-10	8.27675e-08	2.1355
POS	POS_401.264_2.6573	401.264	2.6573	"Eicosa-5,8,11,14-tetraenoic acid 1,3-dihydroxypropan-2-yl ester"	70.47	C23H38O4						"Ecgoninium Methyl Ester(1+);1-Pyrrolidinyloxy, 3-(methoxycarbonyl)-2,2,5,5-tetramethyl-;Tetraethylene glycol monododecyl ether;MG(0:0/20:4(5Z,8Z,11Z,14Z)/0:0);MG(0:0/20:4(8Z,11Z,14Z,17Z)/0:0);MG(20:4(5Z,8Z,11Z,14Z)/0:0/0:0);MG(20:4(8Z,11Z,14Z,17Z)/0:0/0:0);1-Acetoxy-2-hydroxy-5,12,15-heneicosatrien-4-one;[12]-Gingerol;Persenone A;1-Arachidonoylglycerol;Eicosa-5,8,11,14-tetraenoic acid 1,3-dihydr…	10636.1	9488.78	11079.9	11827.6	12420.9	11782	1304.42	1525.21	838.32	1020.14	6866.96	1777.98	6714.02	11205.9	2222.17	5.0428	up	0.00141344	0.00739246	2.20159
POS	POS_779.558_3.9859	779.558	3.9859	DG 47:11	100	C50H76O5	DG	Diacylglycerol				"PA(18:4(6Z,9Z,12Z,15Z)/24:1(15Z));PA(20:0/22:5(4Z,7Z,10Z,13Z,16Z));PA(20:1(11Z)/22:4(7Z,10Z,13Z,16Z));PA(20:3(5Z,8Z,11Z)/22:2(13Z,16Z));PA(20:4(5Z,8Z,11Z,14Z)/22:1(13Z));PA(20:4(8Z,11Z,14Z,17Z)/22:1(13Z));PA(20:5(5Z,8Z,11Z,14Z,17Z)/22:0);PA(22:0/20:5(5Z,8Z,11Z,14Z,17Z));PA(22:1(13Z)/20:4(5Z,8Z,11Z,14Z));PA(22:1(13Z)/20:4(8Z,11Z,14Z,17Z));PA(22:2(13Z,16Z)/20:3(5Z,8Z,11Z));PA(22:4(7Z,10Z,13Z,16Z)/…	5826.93	5052.85	6158.14	7255.63	9777.05	7181.12	1609.61	1420.25	934.609	1000.84	1967.51	1121.09	4108.8	6875.29	1342.32	5.122	up	1.15022e-06	3.11616e-05	2.12105
POS	POS_302.303_2.328	302.303	2.328	SPB 18:0;O2	100	C18H39NO2	DHSph	Sphinganine					11128.2	10479	12204.8	11535.5	17832.3	11861.8	3498.28	1703	2136.64	2513.55	2017.7	2525.12	7453	12507	2399.05	5.2133	up	2.45209e-07	1.01757e-05	2.1414
POS	POS_778.65_7.1777	778.65	7.1777	TG 13:0_14:0_17:3;O	90.1	C47H84O7	OxTG	Oxidized triglyceride					72504.6	64964.4	44006.1	52762.4	54816.8	46969.1	10014.8	9771.64	10740.6	9526.11	13244.1	7535.15	33071.3	56003.9	10138.7	5.5238	up	2.06954e-08	1.80663e-06	2.18199
POS	POS_820.695_7.6108	820.695	7.6108	TG 14:1_19:1_14:1;O	83.6	C50H90O7	OxTG	Oxidized triglyceride					20537.5	28683.4	17379.8	22182.4	17099.7	19170.9	3083.4	2890.6	2118.87	1984.62	7406.98	4802.42	12278.4	20842.3	3714.48	5.6111	up	0.000118528	0.00106211	2.20144
POS	POS_780.665_7.477	780.665	7.477	TG 15:0_15:1_14:1;O	92.2	C47H86O7	OxTG	Oxidized triglyceride				"3,5-Diiodosalicylic acid"	51015.8	78171.3	53647.3	53436.7	63104.6	52382.9	5506.17	9209.92	10756.1	8161.88	20108	7784.4	34440.4	58626.4	10254.4	5.7172	up	4.84247e-05	0.000528857	2.21591
POS	POS_771.639_3.4038	771.639	3.4038	SM 23:2;O2/16:0	91.6	C44H87N2O6P	SM	Sphingomyelin				"Pentadecanoylcarnitine;13-Methyltetradecanoylcarnitine;11-Methyltetradecanoylcarnitine;10-Methyltetradecanoylcarnitine;8-Methyltetradecanoylcarnitine;9-Methyltetradecanoylcarnitine;7-Methyltetradecanoylcarnitine;3-Methyltetradecanoylcarnitine;4-Methyltetradecanoylcarnitine;5-Methyltetradecanoylcarnitine;6-Methyltetradecanoylcarnitine;12-Methyltetradecanoylcarnitine;N-Stearoyl Threonine;4,4-Dimet…	24293.3	12114	20671.3	10781	37444.1	33989.2	6182.06	2670.6	3408.04	3022.58	1097.2	7608.19	13606.8	23215.5	3998.11	5.8066	up	0.000497165	0.00326577	2.1094
POS	POS_792.547_6.2046	792.547	6.2046	"PE(18:0/22:6(4Z,7Z,10Z,13Z,16Z,19Z))"	89.88	C45H78NO8P	PE	Phosphatidylethanolamine	Diacylglycerophosphoethanolamines [GP0201]	Glycerophosphoethanolamines [GP02]	Glycerophospholipids [GP]	"PC(15:0/22:6(4Z,7Z,10Z,13Z,16Z,19Z));PC(22:6(4Z,7Z,10Z,13Z,16Z,19Z)/15:0);PE(18:0/22:6(4Z,7Z,10Z,13Z,16Z,19Z));PE(18:1(11Z)/22:5(4Z,7Z,10Z,13Z,16Z));PE(18:1(11Z)/22:5(7Z,10Z,13Z,16Z,19Z));PE(18:1(9Z)/22:5(4Z,7Z,10Z,13Z,16Z));PE(18:1(9Z)/22:5(7Z,10Z,13Z,16Z,19Z));PE(18:2(9Z,12Z)/22:4(7Z,10Z,13Z,16Z));PE(18:4(6Z,9Z,12Z,15Z)/22:2(13Z,16Z));PE(20:1(11Z)/20:5(5Z,8Z,11Z,14Z,17Z));PE(20:2(11Z,14Z)/20:4…	144489	133367	154111	154149	239734	150388	33435.2	36613.3	31795.3	4805.87	35619.7	23900.9	95200.7	162706	27695	5.8749	up	0.00140381	0.00736027	2.19178
POS	POS_764.518_5.7897	764.518	5.7897	"PE(20:3(8Z,11Z,14Z)/18:3(6Z,9Z,12Z))"	74.79	C43H74NO8P	PE	Phosphatidylethanolamine	Diacylglycerophosphoethanolamines [GP0201]	Glycerophosphoethanolamines [GP02]	Glycerophospholipids [GP]	"PE(16:0/22:6(4Z,7Z,10Z,13Z,16Z,19Z));PE(16:1(9Z)/22:5(4Z,7Z,10Z,13Z,16Z));PE(16:1(9Z)/22:5(7Z,10Z,13Z,16Z,19Z));PE(18:1(11Z)/20:5(5Z,8Z,11Z,14Z,17Z));PE(18:1(9Z)/20:5(5Z,8Z,11Z,14Z,17Z));PE(18:2(9Z,12Z)/20:4(5Z,8Z,11Z,14Z));PE(18:2(9Z,12Z)/20:4(8Z,11Z,14Z,17Z));PE(18:3(6Z,9Z,12Z)/20:3(5Z,8Z,11Z));PE(18:3(6Z,9Z,12Z)/20:3(8Z,11Z,14Z));PE(18:3(9Z,12Z,15Z)/20:3(5Z,8Z,11Z));PE(18:3(9Z,12Z,15Z)/20:3(8…	211683	114472	237104	231758	247731	228427	19214.7	21808.6	17203.9	27772.1	45799.3	81710.9	123724	211862	35584.9	5.9537	up	0.000172858	0.00142502	2.23043
POS	POS_397.378_9.0442	397.378	9.0442	ST 29:1;O	83.4	C29H50O	ST	Sterol Lipids				Guanethidine	30485.9	36507.7	37822.1	37002.3	30868.8	44825.7	3278.38	4250.63	4232.31	4860.03	11839.9	7885.32	21154.9	36252.1	6057.76	5.9844	up	9.86045e-05	0.000921268	2.25104
POS	POS_772.576_2.016	772.576	2.016	PC(P-18:0/18:1(9Z))	78.99	C44H86NO7P	PC	Phosphatidylcholine	"1Z-alkenyl,2-acylglycerophosphocholines [GP0103]"	Glycerophosphocholines [GP01]	Glycerophospholipids [GP]	nonaprenyl-4-hydroxybenzoate	287.809	84.9915	182.816	282.068	262.12	247.164	32.8805	24.5688	35.2018	51.2714	26.7867	50.9106	130.716	224.495	36.9366	6.0778	up	3.6195e-05	0.000420254	2.15685
NEG	NEG_329.247_3.4894	329.247	3.4894	FA 22:5	100	C22H34O2	FA	Fatty acyls		Docosanoids [FA04]	Fatty Acyls [FA]	"Docosapentaenoic acid (22n-6);Docosapentaenoic acid (22n-3);Ethyl abietate;ent-16-Kauren-19-ol acetate;1-Phenyl-1,3-hexadecanedione;2-Methyl-5-(8,11-pentadecadienyl)-1,3-benzenediol;4,8,12,15,19-Docosapentaenoic acid;Ethyl icosapentate;4,7,10,13,16-Docosapentaenoic acid;7,10,13,16,19-Docosapentaenoic acid;Eicosapentaenoic acid ethyl ester;Docosa-2,4,6,8,10-pentaenoic acid;Eicosapentaenoic ethyl …	50408.1	40282.6	45052.8	50411	36748.3	52746.2	8115.56	7749.26	6810.82	7724.44	7183.23	5994.76	26602.3	45941.5	7263.01	6.3254	up	6.97752e-10	1.94044e-07	2.27766
POS	POS_1132.84_6.0358	1132.84	6.0358	PC 62:11	77	C70H118NO8P	PC	Phosphatidylcholine				"2,3-(C14-O-C14)Galactosamine-4-phosphate"	817.469	617.192	4780.98	294.02	3526.25	378.556	879.427	110.764	75.2519	76.7262	391.645	79.3005	1002.3	1735.75	268.852	6.4561	up	0.0174485	0.0526674	1.86025
POS	POS_300.288_2.1805	300.288	2.1805	SPB 18:1;O2	100	C18H37NO2	Sph	Sphingosine				3-Dehydrosphinganine;Palmitoylethanolamide;L-Threo-Sphingosine C-18;Palmitoylethanolamine;Oleic acid;Elaidic acid;Petroselinic acid;Vaccenic acid;(Z)-13-Octadecenoic acid;Ethyl 9-hexadecenoate;7Z-octadecenoic acid;Octadec-9-enoic Acid;cis-Vaccenic acid;11-Aoctadecenoic acid;Octadecenoic acid;Octadec-5-enoic acid;7-Octadecenoic acid;trans-10-Octadecenoic acid;6-Octadecenoic acid;cis-12-Octadecenoi…	30460	52510.9	30535.7	33381.5	30031	35083.6	5789.83	3930.84	5108.69	5847.55	6023.47	5870.09	20381.1	35333.8	5428.41	6.5091	up	2.36367e-08	1.95168e-06	2.28129
POS	POS_894.871_9.3229	894.871	9.3229	TG O-18:0_18:0_18:0	100	C57H112O5	EtherTG	Ether-linked triacylglycerol					43240.8	53808.6	28377.7	46732.4	39968.2	43433	44.0733	5564.89	63.0185	8191.63	15566.1	9321.63	24526	42593.5	6458.56	6.5949	up	0.0309739	0.0822807	2.51335
POS	POS_782.681_7.6967	782.681	7.6967	TG 15:0_15:0_14:1;O	93.8	C47H88O7	OxTG	Oxidized triglyceride					42797.4	57141.5	37571.6	40701	55290.9	40863	5894.24	5588.07	5730.34	5480.29	13289.4	4306.28	26221.2	45727.5	6714.78	6.81	up	9.21169e-06	0.000149644	2.32958
POS	POS_561.448_5.4666	561.448	5.4666	DG 30:1	100	C33H62O5	DG	Diacylglycerol				"DG(14:0/18:4(6Z,9Z,12Z,15Z)/0:0);DG(14:1(9Z)/18:3(6Z,9Z,12Z)/0:0);DG(14:1(9Z)/18:3(9Z,12Z,15Z)/0:0);DG(18:3(6Z,9Z,12Z)/14:1(9Z)/0:0);DG(18:3(9Z,12Z,15Z)/14:1(9Z)/0:0);DG(18:4(6Z,9Z,12Z,15Z)/14:0/0:0);Corepoxylone;DG(14:0/0:0/18:4n3);DG(14:1n5/0:0/18:3n6);DG(14:1n5/0:0/18:3n3);Neurosporene;DG(14:0/16:1(9Z)/0:0);DG(14:1(9Z)/16:0/0:0);DG(16:0/14:1(9Z)/0:0);DG(16:1(9Z)/14:0/0:0);beta-Zeacarotene;alp…	11771.8	6358.7	10922	12229.7	15637.1	13249.9	1775.42	1593.08	1315.72	1585.6	2032.85	1688.35	6680.02	11694.9	1665.17	7.0232	up	2.08618e-06	4.85751e-05	2.30762
POS	POS_1024.82_8.1238	1024.82	8.1238	TG 20:4_22:4_22:4	100	C67H106O6	TG	Triacylglycerol					14012.4	16070.6	16156.1	16451.7	20294.7	14158.2	87.5684	493.043	677.193	963.994	282.511	10090.6	9144.88	16190.6	2099.16	7.7129	up	0.00415026	0.0172932	2.76662
POS	POS_808.696_7.7514	808.696	7.7514	TG 15:0_17:1_14:1;O	95.3	C49H90O7	OxTG	Oxidized triglyceride				b-Cryptoxanthin palmitate	138536	213751	140018	155890	144969	159395	16874.5	17301.7	21045.9	18707.1	32647.8	14506.1	89470.2	158760	20180.5	7.867	up	2.71891e-07	1.09974e-05	2.41236
POS	POS_728.625_8.4654	728.625	8.4654	SE 28:1/22:6	100	C50H78O2	CASE	Campesterol ester					5253.73	6982.82	10466.6	8414.4	18023.7	9291.23	966.589	1330.25	899.523	1006.55	2265.06	871.326	5480.98	9738.74	1223.22	7.9616	up	4.10831e-06	8.0633e-05	2.35354
POS	POS_858.713_7.5783	858.713	7.5783	TG 18:2_18:2_14:1;O	98.7	C53H92O7	OxTG	Oxidized triglyceride				Isofucosterol 3-O-[6-O-Octadecanoyl-b-D-glucopyranoside];Sitoindoside II;Sitosterol 3-O-(6'-O-oleyl-beta-D-glucoside)	668597	991024	637825	726201	595912	752786	70653.7	68558.9	71147	74983.6	118444	134344	409206	728724	89688.4	8.1251	up	3.221e-07	1.23172e-05	2.42783
POS	POS_303.231_2.008	303.231	2.008	8(S)-HETE	78.97	C20H32O3			Hydroxy/hydroperoxyeicosatetraenoic acids [FA0306]	Eicosanoids [FA03]	Fatty Acyls [FA]	"Eicosapentaenoic acid;Retinyl ester;Methyltestosterone;8,15-Isopimaradien-18-oic acid;Siderone;Yucalexin B14;Yucalexin A16;8(17),12-Labdadiene-15,16-dial;Cascarillone;8,13-Abietadien-18-oic acid;(ent-15beta,16beta)-15,16-Epoxy-3-kauranone;ent-8(17),13(16),14-Labdatrien-18-oic acid;Methenolone;(1R,4Ar,7S)-1,4a,7-Trimethyl-7-vinyl-1,2,3,4,4a,6,7,8,8a,9,10,10a-dodecahydro-phenanthrene-1-carboxylic …	867162	1.20125e+06	818254	928300	730433	932902	111399	100886	122731	108003	122203	106552	512506	913049	111962	8.155	up	1.69196e-08	1.57796e-06	2.42851
NEG	NEG_327.232_3.0213	327.232	3.0213	FA 22:6	100	C22H32O2	FA	Fatty acyls	Unsaturated fatty acids [FA0103]	Fatty Acids and Conjugates [FA01]	Fatty Acyls [FA]	"Docosahexaenoic acid;Neogrifolin;Grifolin;Retinol acetate;(Z,Z)-2-Methyl-5-(8,11,14-pentadecatrienyl)-1,3-benzenediol;N-Lauroyl Glutamine;Docosahexaenoicacid(DHA);9-cis Retinol Acetate;(4E,7E,10Z,13E,16E,19E)-Docosa-4,7,10,13,16,19-hexaenoic acid;Promestrienum;1-(1-Methoxy-1-methylethyl)-4-methylbenzene;Benzyl butyl ether;trans-Jasmone;5-Phenyl-1-pentanol;1-Phenyl-2-pentanol;2-Methyl-4-phenyl-2-…	111240	80917.8	95594.9	114602	80703	119430	13905.1	12454.2	12714.9	12701.7	10816.5	10363.6	56287	100415	12159.3	8.2582	up	3.41134e-09	5.23348e-07	2.43446
NEG	NEG_762.507_5.7973	762.507	5.7973	"PE(16:0/22:6(4Z,7Z,10Z,13Z,16Z,19Z))"	73.4	C43H74NO8P	PE	Phosphatidylethanolamine	Diacylglycerophosphoethanolamines [GP0201]	Glycerophosphoethanolamines [GP02]	Glycerophospholipids [GP]	"PE(16:0/22:6(4Z,7Z,10Z,13Z,16Z,19Z));PE(16:1(9Z)/22:5(4Z,7Z,10Z,13Z,16Z));PE(16:1(9Z)/22:5(7Z,10Z,13Z,16Z,19Z));PE(18:1(11Z)/20:5(5Z,8Z,11Z,14Z,17Z));PE(18:1(9Z)/20:5(5Z,8Z,11Z,14Z,17Z));PE(18:2(9Z,12Z)/20:4(5Z,8Z,11Z,14Z));PE(18:2(9Z,12Z)/20:4(8Z,11Z,14Z,17Z));PE(18:3(6Z,9Z,12Z)/20:3(5Z,8Z,11Z));PE(18:3(6Z,9Z,12Z)/20:3(8Z,11Z,14Z));PE(18:3(9Z,12Z,15Z)/20:3(5Z,8Z,11Z));PE(18:3(9Z,12Z,15Z)/20:3(8…	73037.8	61646.2	77714.3	78263.2	62897	87207.2	4868	13353.1	10741.6	7967.24	7982.46	6021.37	40975	73460.9	8488.96	8.6537	up	5.90663e-06	0.000105397	2.47134
POS	POS_428.37_2.6818	428.37	2.6818	C18Octadecanoyl-L-Carnitine	86.62	C25H49NO4			Fatty acyl carnitines [FA0707]	Fatty esters [FA07]	Fatty Acyls [FA]	"5-Methylheptadecanoylcarnitine;11-Methylheptadecanoylcarnitine;14-Methylheptadecanoylcarnitine;9-Methylheptadecanoylcarnitine;8-Methylheptadecanoylcarnitine;15-Methylheptadecanoylcarnitine;10-Methylheptadecanoylcarnitine;7-Methylheptadecanoylcarnitine;13-Methylheptadecanoylcarnitine;3-Methylheptadecanoylcarnitine;16-Methylheptadecanoylcarnitine;4-Methylheptadecanoylcarnitine;6-Methylheptadecanoy…	19635.2	16088.4	18217.6	20532.1	19705.6	20392.2	2195.73	1804.34	1944.86	1861.82	2881.69	1699.68	10579.9	19095.2	2064.69	9.2485	up	2.30079e-08	1.93989e-06	2.51205
POS	POS_840.746_8.1395	840.746	8.1395	TG 14:0_20:0_14:0;O	85.7	C51H98O7	OxTG	Oxidized triglyceride					28433.6	38587.6	30242	32960.1	85092.8	34704	3811.98	3876.6	4302.59	3814.69	6465.21	3775.55	23005.6	41670	4341.1	9.5989	up	3.84809e-06	7.66503e-05	2.45897
POS	POS_860.729_7.7746	860.729	7.7746	ASG 27:1;O;Hex;FA 20:0	100	C53H94O7	AHexCS	Acylhexosyl cholesterol				Sitosterol 3-O-(6'-O-stearyl-beta-D-glucoside)	1.60563e+06	2.38455e+06	1.54494e+06	1.77375e+06	1.44403e+06	1.83808e+06	137567	140868	153341	149213	267759	109156	962407	1.76516e+06	159651	11.0564	up	1.11932e-07	5.74664e-06	2.60685
POS	POS_810.703_7.9366	810.703	7.9366	TG 16:0_16:0_14:1;O	100	C49H92O7	OxTG	Oxidized triglyceride					154952	231349	156379	177826	104124	10081.4	8560.95	10814.8	12536	10830.7	22542.1	9678.15	75806.2	139119	12493.8	11.135	up	0.00509344	0.0203353	2.21889
NEG	NEG_790.537_6.2043	790.537	6.2043	PE 18:0_22:6	100	C45H78NO8P	PE	Phosphatidylethanolamine				"PC(15:0/22:6(4Z,7Z,10Z,13Z,16Z,19Z));PC(22:6(4Z,7Z,10Z,13Z,16Z,19Z)/15:0);PE(18:0/22:6(4Z,7Z,10Z,13Z,16Z,19Z));PE(18:1(11Z)/22:5(4Z,7Z,10Z,13Z,16Z));PE(18:1(11Z)/22:5(7Z,10Z,13Z,16Z,19Z));PE(18:1(9Z)/22:5(4Z,7Z,10Z,13Z,16Z));PE(18:1(9Z)/22:5(7Z,10Z,13Z,16Z,19Z));PE(18:2(9Z,12Z)/22:4(7Z,10Z,13Z,16Z));PE(18:4(6Z,9Z,12Z,15Z)/22:2(13Z,16Z));PE(20:1(11Z)/20:5(5Z,8Z,11Z,14Z,17Z));PE(20:2(11Z,14Z)/20:4…	40500.5	32560.7	41965.3	40211.6	35342.5	46473.8	3297.57	3569.71	3863.8	3743.88	3501.1	3021.82	21504.4	39509.1	3499.65	11.2894	up	3.02408e-11	2.70363e-08	2.61744
POS	POS_834.712_7.7661	834.712	7.7661	TG 17:1_17:1_14:1;O	100	C51H92O7	OxTG	Oxidized triglyceride					1.01036e+06	1.46269e+06	947379	1.0791e+06	909262	1.13162e+06	64330.5	69529.9	80654.9	74121.2	116951	77355.1	585279	1.09007e+06	80490.4	13.5428	up	7.23348e-10	1.94044e-07	2.71301
POS	POS_864.754_8.1698	864.754	8.1698	TG 16:0_18:2_16:0;O	100	C53H98O7	OxTG	Oxidized triglyceride					545292	752961	349225	376297	666255	379690	27465.1	29683.9	49043.6	33134.8	45821.3	29587.9	273705	511620	35789.4	14.2953	up	5.27661e-08	3.53506e-06	2.71236
POS	POS_862.741_7.975	862.741	7.975	TG 18:1_18:1_14:1;O	100	C53H96O7	OxTG	Oxidized triglyceride					1.27322e+06	1.77013e+06	1.25304e+06	1.40923e+06	1.17617e+06	1.49731e+06	71815.4	78196.1	94995.2	86443.5	130695	114025	746272	1.39652e+06	96028.4	14.5427	up	3.2267e-09	5.13243e-07	2.7528
POS	POS_411.36_5.2101	411.36	5.2101	"Stigmasta-4,22-Dien-3-One"	70.22	C29H46O						"4,4-Dimethylcholesta-8,14,24-trienol;delta8,14-Sterol;28-Norcyclomusalenone;(4alpha,5alpha)-4,14-Dimethyl-9,19-cyclocholest-20-en-3-one;Corbisterol;22-Dehydroclerosterol;(3beta,5alpha,22E,24S)-Stigmasta-7,22,25-trien-3-ol;(3beta,22E,24R)-23-Methylergosta-5,7,22-trien-3-ol;Stigmasta-4,6-dien-3-one;2,4-Methylene cholesterol;25(27)-Dehydrochondrillasterol;25(27)-Dehydroporiferasterol;Stigmasta-4-22…	29267.5	24740.7	31218.8	29977.2	26504.6	32180.8	1918.65	1858.07	1945.51	1896.84	2162.43	1968.14	15469.9	28981.6	1958.27	14.7996	up	2.58533e-11	2.49065e-08	2.76292
POS	POS_582.506_6.1051	582.506	6.1051	DG 14:0_18:2	100	C35H64O5	DG	Diacylglycerol				"Cer(d17:1/18:1(12Z)-2OH(9,10));DG(14:0/18:2(9Z,12Z)/0:0);DG(14:1(9Z)/18:1(11Z)/0:0);DG(14:1(9Z)/18:1(9Z)/0:0);DG(16:1(9Z)/16:1(9Z)/0:0);DG(18:1(11Z)/14:1(9Z)/0:0);DG(18:1(9Z)/14:1(9Z)/0:0);DG(18:2(9Z,12Z)/14:0/0:0);Annotemoyin 1;Panatellin;cis-Solamin;DG(14:1n5/0:0/18:1n7);DG(14:1n5/0:0/18:1n9);DG(16:1n7/0:0/16:1n7)"	22519.6	19502	22394.2	25594.9	29521.6	24200.1	743.015	1916.02	984.538	767.42	2927.83	655.69	12643.9	23955.4	1332.42	17.9789	up	3.52832e-05	0.000412066	2.89489
POS	POS_836.725_7.9708	836.725	7.9708	TG 16:0_18:1_14:1;O	99.5	C51H94O7	OxTG	Oxidized triglyceride					819860	1.1919e+06	806710	906649	754341	1.14938e+06	37597.6	41497.4	47039.9	42410.6	67960.2	74772.8	495010	938141	51879.7	18.083	up	8.56035e-09	9.82054e-07	2.86094
POS	POS_663.455_1.9982	663.455	1.9982	"5-[(1S,2R,4aR)-1,2,4a,5-tetramethyl-7-oxo-3,4,8,8a-tetrahydro-2H-naphthalen-1-yl]-3-methylpentanoic acid"	70.82	C20H32O3						Rollinecin A;Annomutacin;Squamoxinone;Annoglacin A;Asitrilobin D;Asitrilobin C	18771.8	22087.4	15720.3	18489.3	18746.2	16998.9	592.481	247.919	408.477	214.174	472.197	268.451	9418.13	18469	367.283	50.2854	up	6.19754e-07	1.97694e-05	3.34787
POS	POS_605.453_1.9977	605.453	1.9977	SM 27:1;O2	87.8	C32H65N2O6P	SM	Sphingomyelin				"Eicosapentaenoic acid;Retinyl ester;Methyltestosterone;8,15-Isopimaradien-18-oic acid;Siderone;Yucalexin B14;Yucalexin A16;8(17),12-Labdadiene-15,16-dial;Cascarillone;8,13-Abietadien-18-oic acid;(ent-15beta,16beta)-15,16-Epoxy-3-kauranone;ent-8(17),13(16),14-Labdatrien-18-oic acid;Methenolone;(1R,4Ar,7S)-1,4a,7-Trimethyl-7-vinyl-1,2,3,4,4a,6,7,8,8a,9,10,10a-dodecahydro-phenanthrene-1-carboxylic …	14793.1	24034.4	11490.1	14603.6	13956.8	13108.8	32.428	133.475	287.09	101.093	262.572	219.619	7751.92	15331.1	172.713	88.7665	up	1.19082e-05	0.000181295	3.59421
POS	POS_781.581_2.7537	781.581	2.7537	"SM(d19:1/20:4(5Z,8Z,11Z,14Z)-OH(19S))"	89.38	C44H81N2O7P	SM	Sphingomyelin	Ceramide phosphocholines (sphingomyelins) [SP0301]	Phosphosphingolipids [SP03]	Sphingolipids [SP]	"1-Phenyl-2-decanoylamino-3-morpholino-1-propanol;PA(18:3(6Z,9Z,12Z)/24:1(15Z));PA(18:3(9Z,12Z,15Z)/24:1(15Z));PA(18:4(6Z,9Z,12Z,15Z)/24:0);PA(20:0/22:4(7Z,10Z,13Z,16Z));PA(20:3(5Z,8Z,11Z)/22:1(13Z));PA(20:4(5Z,8Z,11Z,14Z)/22:0);PA(20:4(8Z,11Z,14Z,17Z)/22:0);PA(22:0/20:4(5Z,8Z,11Z,14Z));PA(22:0/20:4(8Z,11Z,14Z,17Z));PA(22:1(13Z)/20:3(5Z,8Z,11Z));PA(22:4(7Z,10Z,13Z,16Z)/20:0);PA(24:0/18:4(6Z,9Z,12…	350.357	46.4758	126.253	152.116	513.692	182.196	98.2176	153.927	59.3784	41.2331	295624	247.8	24799.6	228.515	49370.7	0.0046	down	0.611141	0.744249	0.693198
POS	POS_830.618_2.122	830.618	2.122	"PC(20:0/18:1(9Z)-O(12,13))"	78.2	C46H88NO9P	PC	Phosphatidylcholine	Diacylglycerophosphocholines [GP0101]	Glycerophosphocholines [GP01]	Glycerophospholipids [GP]		110.529	826.495	124.921	95.1816	268.971	114.58	82.5074	11.0062	11.1081	104.181	289801	58.5796	24300.8	256.78	48344.7	0.0053	down	0.949683	0.971221	0.460541
POS	POS_773.554_5.5504	773.554	5.5504	SM 40:8;O2	77.4	C45H77N2O6P	SM	Sphingomyelin					2736.52	6889.13	2979.07	3360.01	3090.43	3133.83	4817.56	3347.38	3061.88	3081.15	1.55868e+06	2620.37	133150	3698.16	262602	0.0141	down	0.390974	0.554984	0.954295
POS	POS_780.546_3.0486	780.546	3.0486	"PC(P-16:0/20:5(5Z,8Z,11Z,14Z,16E)-OH(18))"	86.46	C44H78NO8P	PC	Phosphatidylcholine	Diacylglycerophosphocholines [GP0101]	Glycerophosphocholines [GP01]	Glycerophospholipids [GP]	"PC(14:0/22:5(4Z,7Z,10Z,13Z,16Z));PC(14:0/22:5(7Z,10Z,13Z,16Z,19Z));PC(14:1(9Z)/22:4(7Z,10Z,13Z,16Z));PC(16:0/20:5(5Z,8Z,11Z,14Z,17Z));PC(16:1(9Z)/20:4(5Z,8Z,11Z,14Z));PC(16:1(9Z)/20:4(8Z,11Z,14Z,17Z));PC(18:1(11Z)/18:4(6Z,9Z,12Z,15Z));PC(18:1(9Z)/18:4(6Z,9Z,12Z,15Z));PC(18:2(9Z,12Z)/18:3(6Z,9Z,12Z));PC(18:2(9Z,12Z)/18:3(9Z,12Z,15Z));PC(18:3(6Z,9Z,12Z)/18:2(9Z,12Z));PC(18:3(9Z,12Z,15Z)/18:2(9Z,12…	706.624	1799.47	1301.73	420.397	839.378	917.072	207.624	265.899	262.987	393.035	391345	668.121	33260.6	997.444	65523.8	0.0152	down	0.892987	0.937765	0.383305
POS	POS_707.529_4.3263	707.529	4.3263	SM 35:6;O2	87.6	C40H71N2O6P	SM	Sphingomyelin				"Isopropamide;DG(19:0/18:1(12Z)-2OH(9,10)/0:0);DG(18:1(12Z)-2OH(9,10)/19:0/0:0);DG(19:0/0:0/18:1(12Z)-2OH(9,10));DG(18:1(12Z)-2OH(9,10)/0:0/19:0);DG(i-19:0/18:1(12Z)-2OH(9,10)/0:0);DG(18:1(12Z)-2OH(9,10)/i-19:0/0:0);DG(i-19:0/0:0/18:1(12Z)-2OH(9,10));DG(18:1(12Z)-2OH(9,10)/0:0/i-19:0);DG(18:0/22:6(5Z,7Z,10Z,13Z,16Z,19Z)-OH(4)/0:0);DG(22:6(5Z,7Z,10Z,13Z,16Z,19Z)-OH(4)/18:0/0:0);DG(18:0/0:0/22:6(5Z…	597.602	803.51	515.439	628.301	599.997	655.654	1619.47	1376.58	1409.04	1431.24	160883	2216.68	14394.7	633.417	28156	0.0225	down	0.0799045	0.172712	1.67427
POS	POS_705.551_4.7985	705.551	4.7985	SM 33:1;O2	100	C38H77N2O7P	SM	Sphingomyelin				PC(14:1(9Z)/P-16:0);PE(15:0/P-18:1(11Z));PE(15:0/P-18:1(9Z));PC(P-16:0/14:1(9Z));PE(P-18:1(11Z)/15:0);PE(P-18:1(9Z)/15:0);PC(O-16:1(9Z)/14:1(9Z))	2017.85	3818.64	2178.78	2169.86	2311.54	2727.75	5675.96	4681.39	5211.92	4165.13	621373	2485.09	54901.4	2537.4	107265	0.0237	down	0.162036	0.294732	1.37273
POS	POS_766.552_5.339	766.552	5.339	PC 13:1_22:4	88.26	C43H76NO8P	PC	Phosphatidylcholine	Diacylglycerophosphocholines [GP0101]	Glycerophosphocholines [GP01]	Glycerophospholipids [GP]	"GlcCer(d18:1/18:0);CerP(d18:1/24:1(15Z));Galactosylceramide (d18:1/18:0);PC(P-16:0/P-18:1(11Z));PC(P-16:0/P-18:1(9Z));PC(P-18:1(11Z)/P-16:0);PC(P-18:1(9Z)/P-16:0);PG(16:0/18:1(11Z));PG(16:0/18:1(9Z));PG(16:1(9Z)/18:0);PG(18:0/16:1(9Z));PG(18:1(11Z)/16:0);PG(18:1(9Z)/16:0);20-Deoxynarasin;1-Palmitoyl-2-oleoylglycero-3-phosphoglycerol;PA(19:0/18:1(12Z)-2OH(9,10));PA(18:1(12Z)-2OH(9,10)/19:0);PA(i-…	10947.7	7254.78	10998.2	13258.2	24836.9	11525.1	29037.4	14927.5	10278.6	19345.9	3.02318e+06	33660	267437	13136.8	521738	0.0252	down	0.189133	0.329459	1.29365
POS	POS_778.527_2.7471	778.527	2.7471	"PC(18:3(9Z,12Z,15Z)/18:3(9Z,12Z,15Z))"	84.61	C44H76NO8P	PC	Phosphatidylcholine	Diacylglycerophosphocholines [GP0101]	Glycerophosphocholines [GP01]	Glycerophospholipids [GP]	"PE(15:0/PGF1alpha);PE(PGF1alpha/15:0);PA(17:0/PGF2alpha);PA(PGF2alpha/17:0);PA(17:0/PGE1);PA(PGE1/17:0);PA(17:0/PGD1);PA(PGD1/17:0);PA(19:0/5-iso PGF2VI);PA(5-iso PGF2VI/19:0);PA(a-17:0/PGF2alpha);PA(PGF2alpha/a-17:0);PA(a-17:0/PGE1);PA(PGE1/a-17:0);PA(a-17:0/PGD1);PA(PGD1/a-17:0);PA(i-17:0/PGF2alpha);PA(PGF2alpha/i-17:0);PA(i-17:0/PGE1);PA(PGE1/i-17:0);PA(i-17:0/PGD1);PA(PGD1/i-17:0);PA(i-19:0/…	825.163	956.103	1311.53	666.08	1174.69	989.249	1055.89	977.039	1271.21	1248.57	185183	1793.93	16454.3	987.135	31921.6	0.0309	down	0.253041	0.408709	1.11033
[truncated: 974 more rows]
