# Supplementary material for: Spatial transcriptomic atlas of murine neurotoxocariasis reveals region-specific host responses and dysfunction in the brain
Source: Research Square preprint supplement (doi:10.21203/rs.3.rs-6743037/v1), 2025-06-09
Supplement: Supplementary file 5 [file 9ef614699d10c3b650f34525.xlsx]

## Sheet: Table S5
Table S5. Oligonucleotide primers used in quantitative real-time PCR, molecular cloning, small interfering RNA annealing and prokaryotic expression of recombinant proteins.
Experiement	Target region/gene	Forward primer/sense (5’-3’)	Reverse primer/antisense (5’-3’)	Vector
Molecular identification	ITS	TTGAGGGGAAATGGGTGAC	TGCTGGAGGCCATATCGT	N/A
Molecular cloning	Tc-daf-9	GGTGATATATTTGCTGGTCGCCCAATG	TTAGTCGCGTTCCTTTATGAGACAT	N/A
Molecular cloning	Tc-daf-12	ATGAATGTGATGGACGAGCTTGGACT	TCACTCTGTAGTTTTGAAGAATTCCTTCGG	N/A
Molecular cloning	Tc-pebp-1	ATGTCAGTTGTACACAAAG	GATGCTAGCGTCCGGATT	N/A
Prokaryotic expression	Tc-daf-9	ctcggtaccctcgagggatccGGTGATATATTTGCTGGTCGCCCAATG	agactgcaggtcgacaagcttTTAGTCGCGTTCCTTTATGAGACAT	pCold vector
Prokaryotic expression	Tc-daf-12	cagcaaatgggtcgcggatccGGAATGAATGTGATGGACGAGCTTGGACT	ctcgagtgcggccgcaagcttCTCTGTAGTTTTGAAGAATTCCTTCGG	PET28a vector
Prokaryotic expression	Tc-pebp-1	GGggtaccATGTCAGTTGTACACAAA	GgaattcTTAGGCCTGCGATCGATAGAA	pCold vector
qRT-PCR	Tc-daf-9	CATGTCTTGGTGAGGCTCTAGCT	GTACAGAGGCCATACCCGGT	N/A
qRT-PCR	Tc-daf-12	GATTCGAACCGTGAGGCACT	CGACTCCGGCAACGTCTCAT	N/A
qRT-PCR	Tc-gapdh	CTAAGGCTGTCGGCAAGGT	GACGAATGCGAGTCACCAAC	N/A
qRT-PCR	iNOS	CTATGGCCGCTTTGATGTGC	TTGGGATGCTCCATGGTCAC	N/A
qRT-PCR	Ccl3	CCATATGGAGCTGACACCCC	AAATGACACCTGGCTGGGAG	N/A
qRT-PCR	Tnfa	TTCTATGGCCCAGACCCTCA	AAGGTACAACCCATCGGCTG	N/A
qRT-PCR	Il1b	GGAGAGTGTGGATCCCAAGC	CTCTGCTTGTGAGGTGCTGA	N/A
qRT-PCR	Arg1	ACATTGGCTTGCGAGACGTA	ATCACCTTGCCAATCCCCAG	N/A
qRT-PCR	Pparg	ATCCAAGACAACCTGCTGCA	CGATCTGCCTGAGGTCTGTC	N/A
qRT-PCR	Tgfb	CTTTGTACAACAGCACCCGC	CATAGATGGCGTTGTTGCGG	N/A
qRT-PCR	Il10	CAGAGAAGCATGGCCCAGAA	GCTCCACTGCCTTGCTCTTA	N/A
qRT-PCR	Mouse Gapdh	TGATGGGTGTGAACCACGAG	AGTGATGGCATGGACTGTGG	N/A
RNAi	Nod1	GCGAGACUGUCUUCGUGUUTT	AACACGAAGACAGUCUCGCTT	N/A
RNAi	Nod2	GGUAUAUUCUCUCGCAGAATT	UUCUGCGAGAGAAUAUACCTT	N/A
RNAi	Rip2	CAGAGUUCCUCAAGUACUATT	UAGUACUUGAGGAACUCUGTT	N/A
RNAi	Irrelative control	UUCUCCGAACGUGUCACGUTT	ACGUGACACGUUCGGAGAATT	N/A
Note: Lowercase letters indicates restricted endonuclease site
